# Supplementary material for: Probiotics synergized with conventional regimen in managing Parkinson’s disease
Source: PubMed Central journal article supplement (PMC9130297; doi:10.1038/s41531-022-00327-6), 2022-05-24
Supplement: 41531_2022_327_MOESM1_ESM.pdf [file 41531_2022_327_MOESM1_ESM.pdf]

Supplementary Figure 1. Flowchart of patient recruitment and study process

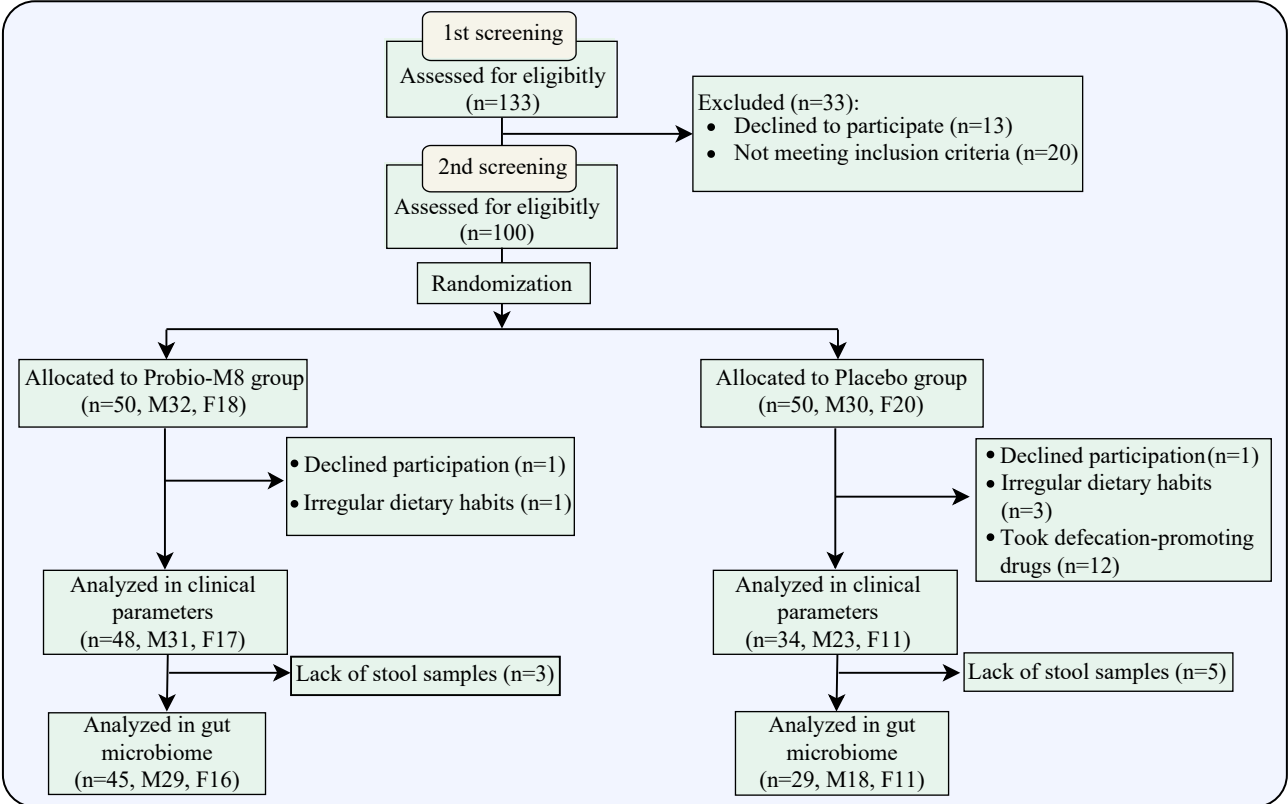

Supplementary Figure 2. The effect of age on the gut microbiota structure

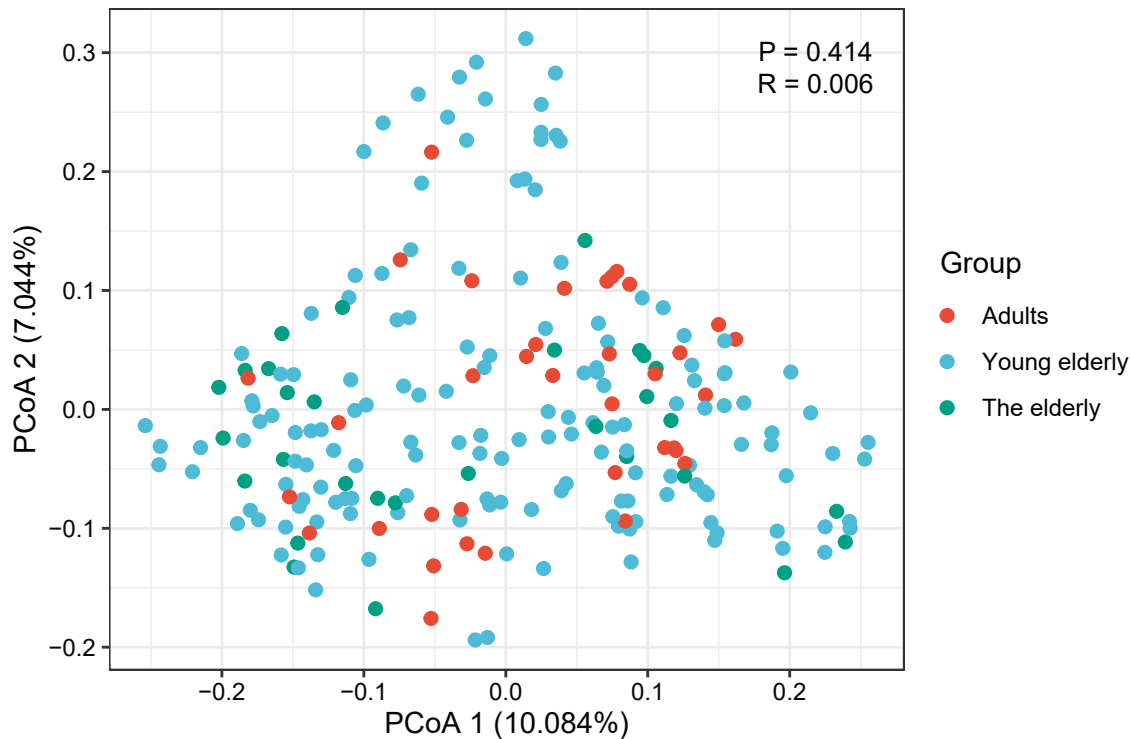

Supplementary Table 1 Information of subjects and Parkinson's disease related questionnaire scores

| <b>Subject Information</b> |        |            |                       |                    |                                         |                   |            |
|----------------------------|--------|------------|-----------------------|--------------------|-----------------------------------------|-------------------|------------|
| Sample_ID                  | Gender | Age (year) | Duration of PD (year) | Hoehn-Yahr grading | Levodopa equivalent daily dosage (mg/d) | Dopamine agonists | Group      |
| Sample_SPA03               |        |            |                       |                    |                                         |                   |            |
| Sample_SPB03               | Female | 72         | 2                     | 1                  | 300                                     | -                 | Probiotics |
| Sample_SPC03               |        |            |                       |                    |                                         |                   |            |
| Sample_SPA04               |        |            |                       |                    |                                         |                   |            |
| Sample_SPB04               | Female | 58         | 2.5                   | 1                  | 375                                     | √                 | Probiotics |
| Sample_SPC04               |        |            |                       |                    |                                         |                   |            |
| Sample_SPA06               |        |            |                       |                    |                                         |                   |            |
| Sample_SPB06               | Male   | 58         | 5                     | 1.5                | 375                                     | √                 | Probiotics |
| Sample_SPC06               |        |            |                       |                    |                                         |                   |            |
| Sample_SPA07               |        |            |                       |                    |                                         |                   |            |
| Sample_SPB07               | Female | 62         | 9                     | 2.5                | 750                                     | -                 | Probiotics |
| Sample_SPC07               |        |            |                       |                    |                                         |                   |            |
| Sample_SPA08               |        |            |                       |                    |                                         |                   |            |
| Sample_SPB08               | Female | 67         | 7                     | 2.5                | 750                                     | √                 | Probiotics |
| Sample_SPC08               |        |            |                       |                    |                                         |                   |            |
| Sample_SPA09               |        |            |                       |                    |                                         |                   |            |
| Sample_SPB09               | Female | 59         | 6                     | 1.5                | 500                                     | √                 | Probiotics |
| Sample_SPC09               |        |            |                       |                    |                                         |                   |            |
| Sample_SPA10               |        |            |                       |                    |                                         |                   |            |
| Sample_SPB10               | Female | 72         | 3                     | 3                  | 1250                                    | -                 | Probiotics |
| Sample_SPC10               |        |            |                       |                    |                                         |                   |            |
| Sample_SPA11               |        |            |                       |                    |                                         |                   |            |
| Sample_SPB11               | Male   | 56         | 3                     | 1                  | 500                                     | -                 | Probiotics |
| Sample_SPC11               |        |            |                       |                    |                                         |                   |            |
| Sample_SPA12               |        |            |                       |                    |                                         |                   |            |
| Sample_SPB12               | Male   | 60         | 9                     | 2.5                | 750                                     | √                 | Probiotics |
| Sample_SPC12               |        |            |                       |                    |                                         |                   |            |
| Sample_SPA13               |        |            |                       |                    |                                         |                   |            |
| Sample_SPB13               | Female | 62         | 2.5                   | 1                  | 750                                     | √                 | Probiotics |
| Sample_SPC13               |        |            |                       |                    |                                         |                   |            |
| Sample_SPA15               |        |            |                       |                    |                                         |                   |            |
| Sample_SPB15               | Female | 68         | 8                     | 2.5                | 1125                                    | -                 | Probiotics |
| Sample_SPC15               |        |            |                       |                    |                                         |                   |            |
| Sample_SPA16               |        |            |                       |                    |                                         |                   |            |
| Sample_SPB16               | Male   | 66         | 2                     | 1                  | 225                                     | -                 | Probiotics |
| Sample_SPC16               |        |            |                       |                    |                                         |                   |            |

|              |        |    |     |     |      |   |            |
|--------------|--------|----|-----|-----|------|---|------------|
| Sample_SPA17 |        |    |     |     |      |   |            |
| Sample_SPB17 | Female | 69 | 9   | 2.5 | 750  | √ | Probiotics |
| Sample_SPC17 |        |    |     |     |      |   |            |
| Sample_SPA20 |        |    |     |     |      |   |            |
| Sample_SPB20 | Female | 74 | 3   | 1   | 500  | √ | Probiotics |
| Sample_SPC20 |        |    |     |     |      |   |            |
| Sample_SPA21 |        |    |     |     |      |   |            |
| Sample_SPB21 | Male   | 59 | 4   | 2.5 | 1250 | - | Probiotics |
| Sample_SPC21 |        |    |     |     |      |   |            |
| Sample_SPA22 |        |    |     |     |      |   |            |
| Sample_SPB22 | Female | 65 | 8   | 2.5 | 750  | √ | Probiotics |
| Sample_SPC22 |        |    |     |     |      |   |            |
| Sample_SPA24 |        |    |     |     |      |   |            |
| Sample_SPB24 | Male   | 58 | 2.5 | 1.5 | 500  | √ | Probiotics |
| Sample_SPC24 |        |    |     |     |      |   |            |
| Sample_SPA25 |        |    |     |     |      |   |            |
| Sample_SPB25 | Male   | 77 | 7   | 1.5 | 750  | √ | Probiotics |
| Sample_SPC25 |        |    |     |     |      |   |            |
| Sample_SPA26 |        |    |     |     |      |   |            |
| Sample_SPB26 | Male   | 70 | 6   | 1.5 | 750  | √ | Probiotics |
| Sample_SPC26 |        |    |     |     |      |   |            |
| Sample_SPA27 |        |    |     |     |      |   |            |
| Sample_SPB27 | Male   | 70 | 3   | 1   | 500  | - | Probiotics |
| Sample_SPC27 |        |    |     |     |      |   |            |
| Sample_SPA28 |        |    |     |     |      |   |            |
| Sample_SPB28 | Male   | 61 | 5   | 2.5 | 1250 | √ | Probiotics |
| Sample_SPC28 |        |    |     |     |      |   |            |
| Sample_SPA30 |        |    |     |     |      |   |            |
| Sample_SPB30 | Female | 61 | 7   | 1.5 | 750  | - | Probiotics |
| Sample_SPC30 |        |    |     |     |      |   |            |
| Sample_SPA31 |        |    |     |     |      |   |            |
| Sample_SPB31 | Male   | 73 | 3   | 2.5 | 1250 | √ | Probiotics |
| Sample_SPC31 |        |    |     |     |      |   |            |
| Sample_SPA32 |        |    |     |     |      |   |            |
| Sample_SPB32 | Male   | 62 | 3.5 | 1   | 375  | - | Probiotics |
| Sample_SPC32 |        |    |     |     |      |   |            |
| Sample_SPA33 |        |    |     |     |      |   |            |
| Sample_SPB33 | Female | 64 | 3   | 2.5 | 500  | - | Probiotics |
| Sample_SPC33 |        |    |     |     |      |   |            |
| Sample_SPA34 |        |    |     |     |      |   |            |
| Sample_SPB34 | Male   | 65 | 2   | 2   | 750  | √ | Probiotics |
| Sample_SPC34 |        |    |     |     |      |   |            |
| Sample_SPA35 |        |    |     |     |      |   |            |
| Sample_SPB35 | Male   | 67 | 3   | 2.5 | 1000 | - | Probiotics |

|              |        |    |    |     |      |   |            |
|--------------|--------|----|----|-----|------|---|------------|
| Sample_SPC35 |        |    |    |     |      |   |            |
| Sample_SPA36 |        |    |    |     |      |   |            |
| Sample_SPB36 | Male   | 55 | 8  | 2.5 | 300  | √ | Probiotics |
| Sample_SPC36 |        |    |    |     |      |   |            |
| Sample_SPA37 |        |    |    |     |      |   |            |
| Sample_SPB37 | Male   | 65 | 4  | 1.5 | 375  | √ | Probiotics |
| Sample_SPC37 |        |    |    |     |      |   |            |
| Sample_SPA38 |        |    |    |     |      |   |            |
| Sample_SPB38 | Male   | 63 | 4  | 2   | 500  | √ | Probiotics |
| Sample_SPC38 |        |    |    |     |      |   |            |
| Sample_SPA39 |        |    |    |     |      |   |            |
| Sample_SPB39 | Male   | 71 | 3  | 2   | 375  | - | Probiotics |
| Sample_SPC39 |        |    |    |     |      |   |            |
| Sample_SPA41 |        |    |    |     |      |   |            |
| Sample_SPB41 | Male   | 77 | 7  | 3   | 1250 | √ | Probiotics |
| Sample_SPC41 |        |    |    |     |      |   |            |
| Sample_SPA42 |        |    |    |     |      |   |            |
| Sample_SPB42 | Male   | 71 | 10 | 3   | 225  | - | Probiotics |
| Sample_SPC42 |        |    |    |     |      |   |            |
| Sample_SPA45 |        |    |    |     |      |   |            |
| Sample_SPB45 | Male   | 63 | 2  | 1.5 | 375  | √ | Probiotics |
| Sample_SPC45 |        |    |    |     |      |   |            |
| Sample_SPA47 |        |    |    |     |      |   |            |
| Sample_SPB47 | Male   | 73 | 2  | 1   | 300  | √ | Probiotics |
| Sample_SPC47 |        |    |    |     |      |   |            |
| Sample_LPA01 |        |    |    |     |      |   |            |
| Sample_LPB01 | Male   | 52 | 2  | 2   | 500  | - | Probiotics |
| Sample_LPC01 |        |    |    |     |      |   |            |
| Sample_LPA02 |        |    |    |     |      |   |            |
| Sample_LPB02 | Male   | 58 | 2  | 1.5 | 500  | √ | Probiotics |
| Sample_LPC02 |        |    |    |     |      |   |            |
| Sample_LPA03 |        |    |    |     |      |   |            |
| Sample_LPB03 | Male   | 72 | 5  | 3   | 750  | - | Probiotics |
| Sample_LPC03 |        |    |    |     |      |   |            |
| Sample_LPA04 |        |    |    |     |      |   |            |
| Sample_LPB04 | Female | 87 | 6  | 2.5 | 750  | √ | Probiotics |
| Sample_LPC04 |        |    |    |     |      |   |            |
| Sample_LPA05 |        |    |    |     |      |   |            |
| Sample_LPB05 | Female | 70 | 5  | 1.5 | 500  | √ | Probiotics |
| Sample_LPC05 |        |    |    |     |      |   |            |
| Sample_LPA08 |        |    |    |     |      |   |            |
| Sample_LPB08 | Female | 68 | 3  | 2.5 | 1125 | - | Probiotics |
| Sample_LPC08 |        |    |    |     |      |   |            |
| Sample_YPA1  |        |    |    |     |      |   |            |

|              |        |    |   |     |      |   |            |
|--------------|--------|----|---|-----|------|---|------------|
| Sample_YPB1  | Male   | 77 | 8 | 2.5 | 1125 | - | Probiotics |
| Sample_YPC1  |        |    |   |     |      |   |            |
| Sample_YPA2  |        |    |   |     |      |   |            |
| Sample_YPB2  | Male   | 65 | 4 | 1   | 0    | √ | Probiotics |
| Sample_YPC2  |        |    |   |     |      |   |            |
| Sample_YPA3  |        |    |   |     |      |   |            |
| Sample_YPB3  | Male   | 72 | 5 | 2.5 | 750  | √ | Probiotics |
| Sample_YPC3  |        |    |   |     |      |   |            |
| Sample_YPA4  |        |    |   |     |      |   |            |
| Sample_YPB4  | Male   | 69 | 6 | 3   | 1250 | - | Probiotics |
| Sample_YPC4  |        |    |   |     |      |   |            |
| Sample_YPA5  |        |    |   |     |      |   |            |
| Sample_YPB5  | Male   | 59 | 5 | 2   | 500  | √ | Probiotics |
| Sample_YPC5  |        |    |   |     |      |   |            |
| Sample_YPA6  |        |    |   |     |      |   |            |
| Sample_YPB6  | Male   | 72 | 7 | 2.5 | 750  | - | Probiotics |
| Sample_YPC6  |        |    |   |     |      |   |            |
| Sample_YPA7  |        |    |   |     |      |   |            |
| Sample_YPB7  | Male   | 76 | 2 | 2.5 | 750  | √ | Probiotics |
| Sample_YPC7  |        |    |   |     |      |   |            |
| Sample_SCA55 |        |    |   |     |      |   |            |
| Sample_SCB55 | Male   | 70 | 7 | 3   | 1000 | √ | placebo    |
| Sample_SCC55 |        |    |   |     |      |   |            |
| Sample_SCA56 |        |    |   |     |      |   |            |
| Sample_SCB56 | Male   | 77 | 5 | 1.5 | 500  | - | placebo    |
| Sample_SCC56 |        |    |   |     |      |   |            |
| Sample_SCA57 |        |    |   |     |      |   |            |
| Sample_SCB57 | Male   | 64 | 3 | 1.5 | 750  | √ | placebo    |
| Sample_SCC57 |        |    |   |     |      |   |            |
| Sample_SCA58 |        |    |   |     |      |   |            |
| Sample_SCB58 | Female | 65 | 2 | 2   | 750  | √ | placebo    |
| Sample_SCC58 |        |    |   |     |      |   |            |
| Sample_SCA59 |        |    |   |     |      |   |            |
| Sample_SCB59 | Male   | 62 | 2 | 3   | 1250 | √ | placebo    |
| Sample_SCC59 |        |    |   |     |      |   |            |
| Sample_SCA60 |        |    |   |     |      |   |            |
| Sample_SCB60 | Male   | 75 | 5 | 2.5 | 750  | - | placebo    |
| Sample_SCC60 |        |    |   |     |      |   |            |
| Sample_SCA61 |        |    |   |     |      |   |            |
| Sample_SCB61 | Male   | 62 | 3 | 2.5 | 500  | √ | placebo    |
| Sample_SCC61 |        |    |   |     |      |   |            |
| Sample_SCA62 |        |    |   |     |      |   |            |
| Sample_SCB62 | Female | 64 | 5 | 2   | 375  | - | placebo    |
| Sample_SCC62 |        |    |   |     |      |   |            |

|              |        |    |     |     |      |   |         |
|--------------|--------|----|-----|-----|------|---|---------|
| Sample_SCA63 |        |    |     |     |      |   |         |
| Sample_SCB63 | Male   | 80 | 7   | 2   | 750  | - | placebo |
| Sample_SCC63 |        |    |     |     |      |   |         |
| Sample_SCA64 |        |    |     |     |      |   |         |
| Sample_SCB64 | Female | 62 | 5   | 2   | 500  | √ | placebo |
| Sample_SCC64 |        |    |     |     |      |   |         |
| Sample_SCA65 |        |    |     |     |      |   |         |
| Sample_SCB65 | Male   | 70 | 5   | 2   | 375  | √ | placebo |
| Sample_SCC65 |        |    |     |     |      |   |         |
| Sample_SCA66 |        |    |     |     |      |   |         |
| Sample_SCB66 | Male   | 68 | 3   | 2   | 500  | - | placebo |
| Sample_SCC66 |        |    |     |     |      |   |         |
| Sample_SCA67 |        |    |     |     |      |   |         |
| Sample_SCB67 | Female | 71 | 6   | 1   | 300  | - | placebo |
| Sample_SCC67 |        |    |     |     |      |   |         |
| Sample_SCA68 |        |    |     |     |      |   |         |
| Sample_SCB68 | Female | 66 | 4   | 2   | 500  | √ | placebo |
| Sample_SCC68 |        |    |     |     |      |   |         |
| Sample_SCA69 |        |    |     |     |      |   |         |
| Sample_SCB69 | Female | 80 | 11  | 3   | 1250 | - | placebo |
| Sample_SCC69 |        |    |     |     |      |   |         |
| Sample_SCA70 |        |    |     |     |      |   |         |
| Sample_SCB70 | Male   | 75 | 7   | 2   | 375  | √ | placebo |
| Sample_SCC70 |        |    |     |     |      |   |         |
| Sample_LCA06 |        |    |     |     |      |   |         |
| Sample_LCB06 | Female | 65 | 2.5 | 2   | 375  | √ | placebo |
| Sample_LCC06 |        |    |     |     |      |   |         |
| Sample_LCA07 |        |    |     |     |      |   |         |
| Sample_LCB07 | Female | 69 | 4   | 3   | 750  | √ | placebo |
| Sample_LCC07 |        |    |     |     |      |   |         |
| Sample_LCA09 |        |    |     |     |      |   |         |
| Sample_LCB09 | Male   | 74 | 4   | 1.5 | 300  | - | placebo |
| Sample_LCC09 |        |    |     |     |      |   |         |
| Sample_LCA10 |        |    |     |     |      |   |         |
| Sample_LCB10 | Male   | 55 | 4   | 1   | 225  | √ | placebo |
| Sample_LCC10 |        |    |     |     |      |   |         |
| Sample_LCA11 |        |    |     |     |      |   |         |
| Sample_LCB11 | Male   | 70 | 9   | 3   | 1000 | - | placebo |
| Sample_LCC11 |        |    |     |     |      |   |         |
| Sample_LCA12 |        |    |     |     |      |   |         |
| Sample_LCB12 | Male   | 69 | 2.5 | 1.5 | 375  | √ | placebo |
| Sample_LCC12 |        |    |     |     |      |   |         |
| Sample_LCA13 |        |    |     |     |      |   |         |
| Sample_LCB13 | Male   | 70 | 8   | 2.5 | 500  | - | placebo |

|              |        |    |     |     |      |   |         |
|--------------|--------|----|-----|-----|------|---|---------|
| Sample_LCC13 |        |    |     |     |      |   |         |
| Sample_LCA14 |        |    |     |     |      |   |         |
| Sample_LCB14 | Male   | 79 | 5   | 3   | 1000 | - | placebo |
| Sample_LCC14 |        |    |     |     |      |   |         |
| Sample_LCA15 |        |    |     |     |      |   |         |
| Sample_LCB15 | Male   | 75 | 5   | 3   | 1125 | - | placebo |
| Sample_LCC15 |        |    |     |     |      |   |         |
| Sample_LCA16 |        |    |     |     |      |   |         |
| Sample_LCB16 | Male   | 74 | 5   | 3   | 750  | √ | placebo |
| Sample_LCC16 |        |    |     |     |      |   |         |
| Sample_LCA17 |        |    |     |     |      |   |         |
| Sample_LCB17 | Female | 73 | 2   | 3   | 750  | - | placebo |
| Sample_LCC17 |        |    |     |     |      |   |         |
| Sample_LCA19 |        |    |     |     |      |   |         |
| Sample_LCB19 | Male   | 68 | 2.5 | 2   | 375  | √ | placebo |
| Sample_LCC19 |        |    |     |     |      |   |         |
| Sample_LCA20 |        |    |     |     |      |   |         |
| Sample_LCB20 | Female | 69 | 2   | 1.5 | 300  | √ | placebo |
| Sample_LCC20 |        |    |     |     |      |   |         |
| Sample_LCA21 |        |    |     |     |      |   |         |
| Sample_LCB21 | Male   | 70 | 7   | 2.5 | 300  | √ | placebo |
| Sample_LCC21 |        |    |     |     |      |   |         |
| Sample_LCA22 |        |    |     |     |      |   |         |
| Sample_LCB22 | Male   | 46 | 2.5 | 2   | 375  | √ | placebo |
| Sample_LCC22 |        |    |     |     |      |   |         |
| Sample_LCA23 |        |    |     |     |      |   |         |
| Sample_LCB23 | Male   | 66 | 3   | 2.5 | 500  | - | placebo |
| Sample_LCC23 |        |    |     |     |      |   |         |
| Sample_LCA24 |        |    |     |     |      |   |         |
| Sample_LCB24 | Female | 73 | 5   | 3   | 1000 | √ | placebo |
| Sample_LCC24 |        |    |     |     |      |   |         |
| Sample_LCA25 |        |    |     |     |      |   |         |
| Sample_LCB25 | Male   | 62 | 2   | 1.5 | 375  | - | placebo |
| Sample_LCC25 |        |    |     |     |      |   |         |



**Parkinson's disease related questionnaire scores**

| Group_time<br>(P: probiotic;<br>C: placebo; A:<br>0d; B: 1M; C:<br>3M) | MMSE | HAMA | HAMD-17 | PDSS | VSA | UPDRS-III |
|------------------------------------------------------------------------|------|------|---------|------|-----|-----------|
| PA                                                                     | 29   | 18   | 6       | 104  | 0   | 6         |
| PB                                                                     | 30   | 12   | 4       | 112  | 0   | 6         |
| PC                                                                     | 30   | 11   | 4       | 112  | 0   | 6         |
| PA                                                                     | 26   | 12   | 11      | 100  | 0   | 9         |
| PB                                                                     | 28   | 13   | 11      | 97   | 0   | 9         |
| PC                                                                     | 29   | 12   | 9       | 98   | 0   | 9         |
| PA                                                                     | 29   | 21   | 14      | 128  | 1   | 4         |
| PB                                                                     | 26   | 17   | 11      | 130  | 1   | 4         |
| PC                                                                     | 26   | 16   | 11      | 130  | 1   | 4         |
| PA                                                                     | 30   | 12   | 4       | 117  | 0   | 14        |
| PB                                                                     | 29   | 9    | 3       | 116  | 0   | 16        |
| PC                                                                     | 30   | 8    | 3       | 116  | 0   | 16        |
| PA                                                                     | 24   | 22   | 12      | 73   | 4   | 32        |
| PB                                                                     | 28   | 21   | 12      | 72   | 4   | 32        |
| PC                                                                     | 28   | 17   | 11      | 99   | 3   | 31        |
| PA                                                                     | 20   | 24   | 7       | 83   | 4   | 22        |
| PB                                                                     | 20   | 17   | 7       | 95   | 4   | 22        |
| PC                                                                     | 20   | 10   | 7       | 105  | 2   | 22        |
| PA                                                                     | 24   | 17   | 9       | 67   | 1   | 43        |
| PB                                                                     | 26   | 17   | 8       | 67   | 1   | 43        |
| PC                                                                     | 24   | 10   | 6       | 81   | 1   | 43        |
| PA                                                                     | 19   | 12   | 6       | 137  | 0   | 14        |
| PB                                                                     | 24   | 8    | 5       | 139  | 0   | 14        |
| PC                                                                     | 28   | 7    | 4       | 145  | 0   | 12        |
| PA                                                                     | 28   | 15   | 7       | 116  | 0   | 24        |
| PB                                                                     | 30   | 14   | 5       | 115  | 0   | 24        |
| PC                                                                     | 29   | 12   | 2       | 114  | 0   | 22        |
| PA                                                                     | 26   | 10   | 3       | 135  | 0   | 7         |
| PB                                                                     | 29   | 10   | 3       | 142  | 0   | 7         |
| PC                                                                     | 29   | 10   | 3       | 142  | 0   | 7         |
| PA                                                                     | 25   | 21   | 8       | 136  | 0   | 28        |
| PB                                                                     | 25   | 21   | 7       | 136  | 0   | 28        |
| PC                                                                     | 27   | 16   | 7       | 137  | 0   | 29        |
| PA                                                                     | 25   | 11   | 1       | 120  | 0   | 6         |
| PB                                                                     | 25   | 11   | 1       | 122  | 0   | 6         |
| PC                                                                     | 25   | 11   | 1       | 121  | 0   | 6         |

|    |      |    |    |     |   |      |
|----|------|----|----|-----|---|------|
| PA | 24   | 11 | 9  | 117 | 0 | 25   |
| PB | 26   | 11 | 9  | 106 | 0 | 25   |
| PC | 26   | 11 | 9  | 106 | 0 | 25   |
| PA | 19   | 22 | 14 | 111 | 4 | 11   |
| PB | 21   | 22 | 13 | 114 | 4 | 11   |
| PC | 21   | 17 | 13 | 127 | 3 | 11   |
| PA | 29   | 23 | 8  | 92  | 0 | 32   |
| PB | 30   | 21 | 8  | 92  | 0 | 32   |
| PC | 30   | 17 | 7  | 107 | 0 | 32   |
| PA | 21   | 24 | 11 | 78  | 4 | 21   |
| PB | 21   | 22 | 11 | 84  | 4 | 21   |
| PC | 22   | 19 | 9  | 84  | 4 | 21   |
| PA | 29   | 3  | 0  | 138 | 0 | 19   |
| PB | 30   | 3  | 0  | 144 | 0 | 18   |
| PC | 30   | 3  | 0  | 140 | 0 | 17   |
| PA | 26   | 37 | 9  | 91  | 0 | 19   |
| PB | 29   | 36 | 9  | 102 | 0 | 19   |
| PC | 29   | 29 | 9  | 100 | 0 | 19   |
| PA | 24   | 12 | 3  | 133 | 0 | 12   |
| PB | 24   | 11 | 3  | 131 | 0 | 12   |
| PC | 23   | 10 | 3  | 134 | 0 | 12   |
| PA | 28   | 7  | 0  | 137 | 0 | 7    |
| PB | 26   | 7  | 0  | 134 | 0 | 7    |
| PC | 26   | 7  | 0  | 134 | 0 | 7    |
| PA | 26   | 9  | 5  | 107 | 0 | 34.5 |
| PB | 26   | 9  | 5  | 107 | 0 | 34.5 |
| PC | 26   | 9  | 5  | 117 | 0 | 32.5 |
| PA | 28   | 14 | 7  | 83  | 0 | 11   |
| PB | 27   | 14 | 7  | 85  | 0 | 12   |
| PC | 27   | 12 | 6  | 87  | 0 | 12   |
| PA | 17   | 24 | 11 | 115 | 0 | 31   |
| PB | 19   | 20 | 9  | 117 | 0 | 30   |
| PC | 19   | 11 | 9  | 117 | 4 | 30   |
| PA | 28   | 15 | 7  | 137 | 0 | 12   |
| PB | 28   | 15 | 7  | 147 | 0 | 12   |
| PC | 28   | 13 | 7  | 147 | 0 | 14   |
| PA | 23   | 10 | 14 | 102 | 0 | 32   |
| PB | 23   | 8  | 14 | 100 | 0 | 32   |
| PC | 23   | 7  | 12 | 103 | 0 | 32   |
| PA | 17.5 | 21 | 10 | 117 | 0 | 17   |
| PB | 17   | 18 | 10 | 135 | 0 | 17   |
| PC | 17   | 15 | 9  | 136 | 0 | 17   |
| PA | 28   | 11 | 6  | 91  | 0 | 24.5 |
| PB | 26   | 11 | 7  | 86  | 0 | 28   |

|    |    |    |    |     |   |    |
|----|----|----|----|-----|---|----|
| PC | 26 | 10 | 7  | 107 | 0 | 28 |
| PA | 22 | 25 | 20 | 82  | 0 | 26 |
| PB | 26 | 24 | 16 | 82  | 0 | 19 |
| PC | 29 | 21 | 16 | 116 | 0 | 19 |
| PA | 30 | 7  | 7  | 100 | 0 | 13 |
| PB | 30 | 7  | 6  | 100 | 0 | 13 |
| PC | 30 | 7  | 6  | 103 | 0 | 13 |
| PA | 27 | 18 | 8  | 83  | 4 | 18 |
| PB | 30 | 17 | 8  | 87  | 1 | 20 |
| PC | 30 | 13 | 7  | 111 | 1 | 20 |
| PA | 30 | 3  | 2  | 122 | 0 | 18 |
| PB | 30 | 3  | 2  | 140 | 0 | 18 |
| PC | 30 | 3  | 2  | 133 | 0 | 18 |
| PA | 23 | 5  | 4  | 109 | 0 | 37 |
| PB | 26 | 5  | 4  | 108 | 0 | 37 |
| PC | 26 | 3  | 4  | 108 | 0 | 37 |
| PA | 26 | 10 | 5  | 136 | 4 | 10 |
| PB | 27 | 7  | 3  | 136 | 3 | 10 |
| PC | 28 | 6  | 3  | 130 | 3 | 10 |
| PA | 28 | 1  | 3  | 129 | 0 | 14 |
| PB | 30 | 1  | 2  | 133 | 0 | 14 |
| PC | 30 | 1  | 2  | 135 | 0 | 14 |
| PA | 19 | 9  | 5  | 124 | 1 | 10 |
| PB | 20 | 8  | 5  | 124 | 1 | 10 |
| PC | 21 | 7  | 4  | 124 | 1 | 10 |
| PA | 30 | 16 | 7  | 125 | 0 | 13 |
| PB | 30 | 13 | 6  | 131 | 0 | 10 |
| PC | 30 | 11 | 2  | 131 | 0 | 10 |
| PA | 30 | 5  | 6  | 138 | 0 | 15 |
| PB | 30 | 5  | 6  | 144 | 0 | 15 |
| PC | 30 | 4  | 5  | 144 | 0 | 15 |
| PA | 29 | 12 | 8  | 138 | 0 | 22 |
| PB | 29 | 10 | 8  | 138 | 0 | 22 |
| PC | 30 | 9  | 6  | 138 | 0 | 19 |
| PA | 19 | 3  | 4  | 113 | 0 | 13 |
| PB | 19 | 3  | 4  | 113 | 0 | 10 |
| PC | 19 | 1  | 0  | 138 | 0 | 10 |
| PA | 21 | 28 | 26 | 110 | 0 | 35 |
| PB | 21 | 20 | 16 | 124 | 0 | 28 |
| PC | 20 | 12 | 8  | 128 | 0 | 21 |
| PA | 18 | 23 | 14 | 133 | 0 | 13 |
| PB | 20 | 21 | 14 | 133 | 0 | 13 |
| PC | 21 | 21 | 14 | 133 | 0 | 13 |
| PA | 30 | 14 | 11 | 79  | 0 | 16 |

|    |    |    |    |     |   |    |
|----|----|----|----|-----|---|----|
| PB | 30 | 7  | 6  | 133 | 0 | 10 |
| PC | 30 | 6  | 6  | 134 | 0 | 10 |
| PA | 30 | 6  | 10 | 136 | 1 | 26 |
| PB | 30 | 6  | 4  | 125 | 0 | 11 |
| PC | 30 | 1  | 1  | 146 | 0 | 9  |
| PA | 27 | 23 | 12 | 106 | 1 | 31 |
| PB | 30 | 14 | 7  | 119 | 4 | 16 |
| PC | 30 | 12 | 7  | 121 | 2 | 15 |
| PA | 20 | 34 | 25 | 109 | 0 | 28 |
| PB | 28 | 28 | 14 | 121 | 0 | 13 |
| PC | 28 | 24 | 12 | 133 | 0 | 11 |
| PA | 30 | 29 | 26 | 78  | 7 | 24 |
| PB | 29 | 8  | 18 | 118 | 0 | 14 |
| PC | 30 | 18 | 18 | 103 | 3 | 9  |
| PA | 28 | 19 | 18 | 111 | 1 | 19 |
| PB | 28 | 16 | 11 | 124 | 0 | 29 |
| PC | 30 | 14 | 14 | 112 | 0 | 29 |
| PA | 23 | 23 | 17 | 106 | 0 | 12 |
| PB | 28 | 14 | 9  | 138 | 0 | 9  |
| PC | 28 | 12 | 8  | 142 | 0 | 9  |
| CA | 30 | 19 | 10 | 130 | 4 | 33 |
| CB | 30 | 16 | 10 | 125 | 4 | 33 |
| CC | 30 | 16 | 10 | 125 | 4 | 33 |
| CA | 30 | 18 | 8  | 141 | 0 | 17 |
| CB | 30 | 18 | 7  | 140 | 0 | 17 |
| CC | 30 | 17 | 7  | 140 | 0 | 19 |
| CA | 24 | 16 | 6  | 132 | 0 | 16 |
| CB | 25 | 26 | 6  | 132 | 0 | 16 |
| CC | 24 | 16 | 6  | 140 | 0 | 16 |
| CA | 25 | 20 | 11 | 125 | 2 | 32 |
| CB | 25 | 21 | 11 | 120 | 2 | 32 |
| CC | 26 | 19 | 11 | 120 | 2 | 32 |
| CA | 23 | 15 | 5  | 135 | 0 | 18 |
| CB | 24 | 15 | 5  | 135 | 0 | 18 |
| CC | 24 | 14 | 5  | 135 | 0 | 20 |
| CA | 23 | 17 | 6  | 118 | 0 | 22 |
| CB | 23 | 17 | 6  | 118 | 0 | 22 |
| CC | 24 | 16 | 6  | 124 | 0 | 22 |
| CA | 28 | 24 | 8  | 120 | 0 | 22 |
| CB | 28 | 24 | 8  | 120 | 0 | 22 |
| CC | 28 | 23 | 8  | 125 | 0 | 26 |
| CA | 28 | 16 | 5  | 140 | 0 | 16 |
| CB | 28 | 15 | 5  | 140 | 0 | 16 |
| CC | 28 | 15 | 5  | 140 | 0 | 16 |

|    |    |    |    |     |   |    |
|----|----|----|----|-----|---|----|
| CA | 20 | 16 | 5  | 138 | 0 | 16 |
| CB | 20 | 16 | 5  | 138 | 0 | 16 |
| CC | 20 | 16 | 5  | 140 | 0 | 16 |
| CA | 30 | 19 | 7  | 117 | 0 | 16 |
| CB | 29 | 18 | 6  | 116 | 0 | 16 |
| CC | 30 | 18 | 6  | 116 | 0 | 16 |
| CA | 26 | 13 | 4  | 136 | 0 | 18 |
| CB | 26 | 13 | 4  | 136 | 0 | 18 |
| CC | 28 | 13 | 4  | 136 | 0 | 18 |
| CA | 27 | 15 | 5  | 128 | 0 | 16 |
| CB | 28 | 14 | 5  | 130 | 0 | 16 |
| CC | 27 | 14 | 5  | 130 | 0 | 16 |
| CA | 26 | 17 | 8  | 136 | 4 | 10 |
| CB | 27 | 16 | 7  | 136 | 3 | 10 |
| CC | 27 | 16 | 7  | 130 | 3 | 10 |
| CA | 26 | 13 | 6  | 138 | 0 | 16 |
| CB | 26 | 13 | 6  | 135 | 0 | 16 |
| CC | 27 | 13 | 5  | 130 | 0 | 16 |
| CA | 24 | 24 | 12 | 105 | 3 | 30 |
| CB | 24 | 13 | 12 | 110 | 3 | 30 |
| CC | 25 | 23 | 12 | 108 | 3 | 30 |
| CA | 30 | 11 | 4  | 118 | 0 | 16 |
| CB | 30 | 11 | 4  | 118 | 0 | 16 |
| CC | 29 | 11 | 4  | 120 | 0 | 16 |
| CA | 20 | 22 | 25 | 106 | 0 | 17 |
| CB | 20 | 18 | 22 | 103 | 0 | 17 |
| CC | 19 | 14 | 21 | 100 | 0 | 17 |
| CA | 15 | 13 | 13 | 150 | 0 | 15 |
| CB | 15 | 12 | 11 | 144 | 0 | 15 |
| CC | 15 | 12 | 11 | 144 | 0 | 15 |
| CA | 28 | 16 | 6  | 131 | 0 | 15 |
| CB | 28 | 16 | 6  | 140 | 0 | 15 |
| CC | 28 | 16 | 4  | 131 | 0 | 15 |
| CA | 30 | 10 | 7  | 120 | 0 | 5  |
| CB | 30 | 8  | 5  | 120 | 0 | 4  |
| CC | 30 | 8  | 5  | 130 | 0 | 6  |
| CA | 29 | 15 | 20 | 130 | 0 | 11 |
| CB | 30 | 13 | 19 | 125 | 0 | 10 |
| CC | 30 | 14 | 19 | 138 | 0 | 11 |
| CA | 27 | 21 | 13 | 79  | 0 | 14 |
| CB | 28 | 21 | 13 | 90  | 0 | 16 |
| CC | 28 | 21 | 13 | 90  | 0 | 16 |
| CA | 29 | 13 | 11 | 150 | 0 | 22 |
| CB | 28 | 13 | 11 | 150 | 0 | 22 |

|    |    |    |    |     |   |    |
|----|----|----|----|-----|---|----|
| CC | 29 | 13 | 11 | 150 | 0 | 22 |
| CA | 17 | 23 | 17 | 130 | 0 | 29 |
| CB | 18 | 22 | 15 | 128 | 0 | 29 |
| CC | 17 | 22 | 15 | 126 | 0 | 32 |
| CA | 29 | 6  | 3  | 104 | 1 | 16 |
| CB | 29 | 6  | 3  | 110 | 1 | 16 |
| CC | 30 | 6  | 3  | 106 | 1 | 18 |
| CA | 23 | 5  | 3  | 106 | 0 | 18 |
| CB | 22 | 5  | 3  | 110 | 0 | 18 |
| CC | 23 | 5  | 3  | 110 | 0 | 18 |
| CA | 24 | 8  | 7  | 145 | 1 | 26 |
| CB | 24 | 7  | 6  | 145 | 1 | 26 |
| CC | 26 | 7  | 6  | 145 | 1 | 26 |
| CA | 27 | 4  | 5  | 141 | 1 | 9  |
| CB | 28 | 4  | 5  | 145 | 1 | 9  |
| CC | 28 | 4  | 5  | 145 | 1 | 9  |
| CA | 16 | 7  | 7  | 132 | 1 | 15 |
| CB | 16 | 7  | 7  | 140 | 1 | 15 |
| CC | 16 | 7  | 7  | 140 | 1 | 15 |
| CA | 29 | 16 | 12 | 130 | 0 | 24 |
| CB | 30 | 14 | 11 | 135 | 0 | 24 |
| CC | 30 | 14 | 11 | 135 | 0 | 25 |
| CA | 30 | 3  | 6  | 147 | 0 | 5  |
| CB | 30 | 3  | 6  | 145 | 0 | 5  |
| CC | 30 | 3  | 6  | 145 | 0 | 5  |
| CA | 26 | 19 | 19 | 111 | 0 | 20 |
| CB | 27 | 17 | 17 | 117 | 0 | 16 |
| CC | 26 | 17 | 17 | 117 | 0 | 16 |
| CA | 17 | 23 | 22 | 106 | 0 | 28 |
| CB | 18 | 21 | 21 | 110 | 0 | 28 |
| CC | 18 | 20 | 21 | 110 | 0 | 28 |
| CA | 30 | 10 | 7  | 123 | 0 | 13 |
| CB | 30 | 10 | 7  | 128 | 0 | 13 |
| CC | 30 | 8  | 7  | 126 | 0 | 14 |

**Constipation-related Symptoms scores**

| ADL | PAC-QCL | Bristol scores | Difficulty in defecation | Hardness of feces | Incomplete defecation | Assisted defecation by hand | spontaneous defecation | completed defecation |
|-----|---------|----------------|--------------------------|-------------------|-----------------------|-----------------------------|------------------------|----------------------|
| 17  | 78      | 3              | 2                        | 2                 | 3                     | 1                           | 6                      | 0                    |
| 17  | 73      | 3              | 2                        | 1                 | 2                     | 1                           | 7                      | 2                    |
| 17  | 61      | 4              | 2                        | 1                 | 1                     | 1                           | 7                      | 3.5                  |
| 18  | 78      | 3              | 2                        | 3                 | 0                     | 1                           | 3                      | 3                    |
| 18  | 68      | 3              | 1                        | 1                 | 0                     | 0                           | 3                      | 3                    |
| 18  | 64      | 4              | 1                        | 1                 | 0                     | 0                           | 3.5                    | 3.5                  |
| 14  | 83      | 4              | 2                        | 2                 | 3                     | 1                           | 3                      | 0                    |
| 14  | 64      | 4              | 1                        | 1                 | 1                     | 0                           | 3.5                    | 2                    |
| 14  | 50      | 4              | 1                        | 1                 | 1                     | 0                           | 3.5                    | 3                    |
| 15  | 59      | 4              | 3                        | 2                 | 1                     | 2                           | 6                      | 4                    |
| 14  | 55      | 4              | 2                        | 1                 | 1                     | 1                           | 6                      | 5                    |
| 14  | 52      | 4              | 1                        | 0                 | 1                     | 1                           | 7                      | 5.5                  |
| 24  | 90      | 1              | 3                        | 3                 | 2                     | 3                           | 1.5                    | 0                    |
| 24  | 70      | 2              | 3                        | 2                 | 1                     | 1                           | 2                      | 1                    |
| 24  | 59      | 4              | 2                        | 1                 | 0                     | 0                           | 2                      | 2                    |
| 15  | 76      | 5              | 2                        | 1                 | 3                     | 1                           | 6                      | 0                    |
| 15  | 56      | 5              | 1                        | 1                 | 2                     | 0                           | 6                      | 1                    |
| 15  | 46      | 4              | 1                        | 1                 | 1                     | 0                           | 6                      | 3.5                  |
| 31  | 87      | 2              | 3                        | 3                 | 3                     | 3                           | 5                      | 0                    |
| 31  | 75      | 3              | 2                        | 2                 | 2                     | 2                           | 7                      | 2                    |
| 31  | 61      | 3              | 2                        | 2                 | 1                     | 2                           | 7                      | 3                    |
| 16  | 59      | 3              | 3                        | 1                 | 0                     | 1                           | 5.5                    | 5.5                  |
| 16  | 50      | 3              | 2                        | 1                 | 0                     | 1                           | 6.5                    | 6.5                  |
| 16  | 45      | 4              | 1                        | 1                 | 0                     | 0                           | 7                      | 7                    |
| 14  | 95      | 2              | 3                        | 3                 | 2                     | 2                           | 4                      | 1                    |
| 14  | 58      | 4              | 2                        | 1                 | 1                     | 0                           | 4                      | 2                    |
| 14  | 51      | 4              | 2                        | 1                 | 0                     | 0                           | 4                      | 4                    |
| 15  | 55      | 4              | 1                        | 1                 | 0                     | 0                           | 2                      | 2                    |
| 15  | 58      | 4              | 1                        | 1                 | 1                     | 0                           | 1.5                    | 0.5                  |
| 15  | 48      | 4              | 1                        | 1                 | 1                     | 0                           | 2.5                    | 2                    |
| 20  | 82      | 2              | 3                        | 3                 | 0                     | 0                           | 2.5                    | 2.5                  |
| 20  | 65      | 3              | 2                        | 1                 | 0                     | 0                           | 3                      | 3                    |
| 20  | 46      | 4              | 1                        | 1                 | 0                     | 0                           | 3.5                    | 3.5                  |
| 14  | 75      | 3              | 3                        | 2                 | 3                     | 0                           | 7                      | 0                    |
| 14  | 49      | 4              | 2                        | 1                 | 2                     | 0                           | 7                      | 2                    |
| 14  | 43      | 4              | 1                        | 1                 | 2                     | 0                           | 7                      | 3.5                  |

|    |    |   |   |   |   |   |     |     |
|----|----|---|---|---|---|---|-----|-----|
| 14 | 78 | 3 | 2 | 3 | 1 | 1 | 2.5 | 2.5 |
| 14 | 49 | 4 | 0 | 0 | 0 | 0 | 7   | 7   |
| 14 | 41 | 4 | 0 | 0 | 0 | 0 | 7   | 7   |
| 14 | 69 | 3 | 2 | 2 | 3 | 0 | 2.5 | 1   |
| 14 | 58 | 4 | 1 | 1 | 2 | 0 | 3.5 | 2.5 |
| 14 | 63 | 4 | 1 | 1 | 1 | 0 | 3.5 | 2.5 |
| 14 | 78 | 1 | 3 | 3 | 0 | 1 | 1   | 1   |
| 14 | 70 | 3 | 2 | 2 | 0 | 1 | 2   | 2   |
| 14 | 66 | 4 | 3 | 1 | 0 | 0 | 3   | 3   |
| 17 | 79 | 4 | 3 | 1 | 1 | 1 | 2   | 1.5 |
| 17 | 71 | 4 | 2 | 2 | 0 | 0 | 3   | 3   |
| 17 | 65 | 3 | 1 | 1 | 1 | 0 | 3   | 3   |
| 14 | 65 | 2 | 3 | 3 | 2 | 3 | 2   | 1   |
| 14 | 56 | 3 | 2 | 2 | 2 | 2 | 2   | 1.5 |
| 14 | 54 | 3 | 2 | 2 | 1 | 1 | 3   | 2   |
| 14 | 91 | 2 | 3 | 3 | 3 | 1 | 1.5 | 0   |
| 14 | 80 | 3 | 2 | 2 | 1 | 1 | 3   | 1   |
| 14 | 73 | 3 | 2 | 2 | 1 | 0 | 3   | 2   |
| 18 | 77 | 3 | 3 | 3 | 2 | 1 | 2.5 | 1.5 |
| 18 | 66 | 4 | 2 | 2 | 2 | 1 | 3   | 2.5 |
| 18 | 64 | 4 | 2 | 2 | 1 | 1 | 3   | 2.5 |
| 15 | 85 | 2 | 3 | 3 | 0 | 1 | 2.5 | 2.5 |
| 15 | 66 | 3 | 2 | 2 | 0 | 1 | 4   | 4   |
| 15 | 50 | 4 | 1 | 2 | 0 | 0 | 4   | 4   |
| 14 | 92 | 3 | 3 | 3 | 1 | 1 | 2.5 | 2   |
| 14 | 78 | 3 | 2 | 2 | 1 | 1 | 3.5 | 3   |
| 14 | 74 | 3 | 2 | 2 | 0 | 0 | 3   | 3   |
| 17 | 52 | 3 | 3 | 2 | 3 | 0 | 1.5 | 0   |
| 17 | 58 | 4 | 2 | 1 | 2 | 0 | 3   | 1   |
| 17 | 54 | 4 | 2 | 1 | 2 | 0 | 3   | 1   |
| 42 | 79 | 2 | 2 | 3 | 2 | 1 | 2.5 | 1   |
| 42 | 72 | 3 | 2 | 2 | 0 | 0 | 4.5 | 4.5 |
| 42 | 70 | 3 | 2 | 1 | 0 | 0 | 4.5 | 4.5 |
| 17 | 88 | 3 | 3 | 3 | 0 | 2 | 3   | 3   |
| 17 | 75 | 4 | 2 | 2 | 0 | 0 | 6   | 6   |
| 16 | 74 | 4 | 2 | 2 | 0 | 0 | 6   | 6   |
| 18 | 74 | 4 | 2 | 2 | 2 | 0 | 7   | 4   |
| 17 | 66 | 4 | 2 | 2 | 0 | 0 | 7   | 7   |
| 17 | 60 | 4 | 2 | 2 | 0 | 0 | 7   | 7   |
| 17 | 75 | 3 | 3 | 3 | 3 | 2 | 1.5 | 0   |
| 17 | 68 | 3 | 2 | 3 | 1 | 2 | 3   | 1   |
| 17 | 65 | 3 | 2 | 2 | 1 | 1 | 2   | 1.5 |
| 36 | 46 | 1 | 3 | 3 | 1 | 1 | 3.5 | 3   |
| 36 | 47 | 2 | 2 | 3 | 1 | 1 | 3   | 1.5 |



|    |     |   |   |   |   |   |     |     |
|----|-----|---|---|---|---|---|-----|-----|
| 43 | 46  | 2 | 2 | 3 | 1 | 1 | 3   | 2   |
| 17 | 70  | 4 | 2 | 0 | 3 | 0 | 3.5 | 0   |
| 17 | 67  | 4 | 2 | 1 | 1 | 0 | 4   | 2   |
| 17 | 66  | 4 | 2 | 1 | 1 | 0 | 3.5 | 1.5 |
| 14 | 81  | 3 | 3 | 3 | 2 | 1 | 1.5 | 0.5 |
| 14 | 77  | 3 | 2 | 2 | 1 | 1 | 3   | 2   |
| 14 | 73  | 3 | 2 | 2 | 1 | 1 | 2.5 | 1.5 |
| 23 | 64  | 4 | 2 | 1 | 1 | 0 | 3.5 | 3.5 |
| 23 | 62  | 4 | 2 | 1 | 0 | 0 | 4   | 4   |
| 23 | 59  | 4 | 2 | 1 | 0 | 0 | 4   | 4   |
| 14 | 84  | 2 | 3 | 3 | 1 | 0 | 1   | 0.5 |
| 14 | 75  | 3 | 2 | 2 | 0 | 0 | 3   | 3   |
| 14 | 74  | 3 | 2 | 1 | 0 | 0 | 2.5 | 2.5 |
| 36 | 85  | 1 | 3 | 3 | 3 | 0 | 1   | 0   |
| 36 | 77  | 3 | 2 | 1 | 0 | 0 | 3   | 3   |
| 36 | 75  | 3 | 2 | 2 | 0 | 0 | 3   | 3   |
| 18 | 57  | 3 | 2 | 2 | 0 | 0 | 3   | 3   |
| 18 | 52  | 3 | 2 | 2 | 0 | 0 | 4   | 4   |
| 18 | 50  | 4 | 2 | 2 | 0 | 0 | 5   | 5   |
| 14 | 49  | 5 | 3 | 2 | 0 | 0 | 2.5 | 2.5 |
| 14 | 55  | 4 | 2 | 2 | 0 | 0 | 4   | 4   |
| 14 | 50  | 4 | 2 | 2 | 0 | 0 | 5   | 5   |
| 16 | 86  | 1 | 2 | 2 | 2 | 0 | 2   | 0.5 |
| 16 | 71  | 3 | 2 | 2 | 1 | 0 | 3   | 2   |
| 16 | 70  | 4 | 1 | 1 | 0 | 0 | 4   | 4   |
| 14 | 41  | 1 | 2 | 1 | 3 | 0 | 3.5 | 0   |
| 14 | 40  | 3 | 2 | 1 | 3 | 0 | 3.5 | 2   |
| 14 | 33  | 3 | 1 | 0 | 3 | 0 | 5.5 | 3   |
| 16 | 60  | 4 | 2 | 2 | 0 | 0 | 3   | 1.5 |
| 16 | 58  | 4 | 2 | 1 | 0 | 0 | 3   | 2   |
| 16 | 58  | 3 | 2 | 1 | 0 | 0 | 3   | 2.5 |
| 24 | 69  | 2 | 2 | 2 | 1 | 1 | 3.5 | 0   |
| 24 | 45  | 3 | 1 | 1 | 0 | 0 | 3.5 | 1.5 |
| 24 | 54  | 3 | 2 | 2 | 1 | 1 | 5   | 3   |
| 29 | 46  | 2 | 2 | 3 | 2 | 2 | 6   | 2   |
| 29 | 46  | 3 | 2 | 3 | 2 | 2 | 6   | 4   |
| 29 | 34  | 4 | 1 | 1 | 0 | 0 | 8.5 | 5   |
| 38 | 110 | 3 | 3 | 3 | 3 | 3 | 1.5 | 0   |
| 38 | 78  | 4 | 2 | 2 | 3 | 2 | 1.5 | 0.5 |
| 36 | 36  | 4 | 1 | 1 | 0 | 0 | 2.5 | 0.5 |
| 24 | 51  | 2 | 0 | 0 | 0 | 0 | 2.5 | 1   |
| 24 | 51  | 3 | 0 | 0 | 0 | 0 | 2.5 | 1   |
| 24 | 51  | 3 | 0 | 0 | 0 | 0 | 2.5 | 1   |
| 20 | 54  | 3 | 3 | 2 | 3 | 0 | 1.5 | 0   |

|    |     |   |   |   |   |   |     |     |
|----|-----|---|---|---|---|---|-----|-----|
| 15 | 33  | 3 | 2 | 2 | 1 | 1 | 3.5 | 3   |
| 14 | 37  | 4 | 2 | 1 | 2 | 0 | 3   | 1   |
| 24 | 86  | 3 | 2 | 3 | 2 | 1 | 2.5 | 1   |
| 15 | 29  | 4 | 2 | 1 | 2 | 0 | 3   | 1   |
| 14 | 33  | 3 | 2 | 1 | 0 | 0 | 4.5 | 4.5 |
| 20 | 68  | 2 | 3 | 3 | 0 | 2 | 3   | 3   |
| 19 | 42  | 3 | 2 | 2 | 0 | 0 | 4.5 | 4.5 |
| 17 | 45  | 4 | 2 | 2 | 0 | 0 | 6   | 6   |
| 35 | 129 | 3 | 2 | 2 | 2 | 0 | 7   | 4   |
| 20 | 77  | 4 | 2 | 2 | 0 | 0 | 6   | 6   |
| 19 | 61  | 4 | 2 | 2 | 0 | 0 | 7   | 7   |
| 39 | 49  | 4 | 3 | 3 | 3 | 2 | 1.5 | 0   |
| 32 | 38  | 4 | 2 | 2 | 0 | 0 | 7   | 7   |
| 25 | 42  | 3 | 2 | 2 | 1 | 1 | 2   | 1.5 |
| 28 | 45  | 3 | 3 | 3 | 1 | 1 | 3.5 | 3   |
| 36 | 45  | 3 | 2 | 3 | 1 | 2 | 3   | 1   |
| 31 | 48  | 2 | 2 | 3 | 1 | 1 | 3   | 2   |
| 21 | 52  | 1 | 2 | 0 | 3 | 0 | 3.5 | 0   |
| 21 | 42  | 2 | 2 | 3 | 1 | 1 | 3   | 1.5 |
| 24 | 40  | 4 | 2 | 1 | 1 | 0 | 3.5 | 1.5 |
| 25 | 82  | 2 | 3 | 3 | 1 | 1 | 1.5 | 1   |
| 25 | 76  | 2 | 3 | 3 | 1 | 1 | 2   | 1   |
| 25 | 75  | 2 | 3 | 3 | 1 | 1 | 2   | 1   |
| 15 | 78  | 1 | 3 | 3 | 1 | 0 | 1.5 | 0.5 |
| 15 | 82  | 2 | 3 | 3 | 1 | 0 | 1.5 | 0.5 |
| 15 | 80  | 2 | 3 | 3 | 1 | 0 | 1.5 | 0.5 |
| 16 | 79  | 3 | 3 | 2 | 1 | 0 | 1   | 0.5 |
| 16 | 79  | 3 | 3 | 2 | 1 | 0 | 2   | 1   |
| 16 | 79  | 3 | 3 | 2 | 1 | 0 | 2   | 1   |
| 25 | 76  | 5 | 2 | 1 | 3 | 1 | 6   | 0   |
| 25 | 83  | 4 | 2 | 2 | 2 | 1 | 4   | 0   |
| 25 | 80  | 4 | 2 | 2 | 2 | 1 | 4   | 2   |
| 16 | 87  | 2 | 3 | 3 | 3 | 3 | 5   | 0   |
| 16 | 85  | 3 | 3 | 3 | 2 | 3 | 6   | 0   |
| 16 | 83  | 3 | 2 | 3 | 2 | 3 | 6   | 2   |
| 18 | 59  | 3 | 3 | 1 | 0 | 1 | 5.5 | 5.5 |
| 18 | 72  | 3 | 3 | 2 | 0 | 1 | 6   | 6   |
| 18 | 70  | 3 | 3 | 2 | 0 | 1 | 6   | 6   |
| 16 | 88  | 3 | 3 | 3 | 0 | 2 | 3   | 3   |
| 16 | 79  | 3 | 3 | 3 | 0 | 2 | 3   | 3   |
| 20 | 80  | 3 | 3 | 3 | 0 | 2 | 3   | 3   |
| 14 | 69  | 3 | 2 | 2 | 3 | 0 | 2.5 | 1   |
| 14 | 90  | 4 | 3 | 2 | 2 | 0 | 3   | 1   |
| 14 | 88  | 4 | 3 | 2 | 2 | 0 | 3   | 1   |

|    |    |   |   |   |   |   |     |     |
|----|----|---|---|---|---|---|-----|-----|
| 20 | 65 | 2 | 3 | 3 | 2 | 3 | 2   | 1   |
| 20 | 76 | 2 | 2 | 3 | 2 | 2 | 2   | 1   |
| 20 | 76 | 3 | 2 | 3 | 1 | 2 | 2   | 1   |
| 14 | 59 | 4 | 3 | 2 | 1 | 2 | 6   | 4   |
| 14 | 67 | 3 | 3 | 2 | 1 | 2 | 5   | 4   |
| 14 | 67 | 3 | 3 | 2 | 1 | 2 | 5   | 4   |
| 14 | 70 | 4 | 2 | 0 | 3 | 0 | 3.5 | 0   |
| 14 | 72 | 3 | 2 | 0 | 2 | 0 | 4   | 0   |
| 14 | 70 | 3 | 2 | 0 | 2 | 0 | 4   | 1   |
| 14 | 81 | 3 | 3 | 3 | 2 | 1 | 1.5 | 0.5 |
| 14 | 83 | 3 | 3 | 3 | 2 | 1 | 1.5 | 0.5 |
| 14 | 83 | 3 | 3 | 3 | 1 | 1 | 1.5 | 0.5 |
| 18 | 84 | 2 | 3 | 3 | 1 | 0 | 1   | 0.5 |
| 18 | 83 | 3 | 3 | 3 | 1 | 0 | 2   | 0.5 |
| 18 | 83 | 3 | 3 | 3 | 1 | 0 | 2   | 0.5 |
| 14 | 64 | 4 | 2 | 1 | 1 | 0 | 3.5 | 3.5 |
| 14 | 80 | 4 | 2 | 2 | 1 | 0 | 3.5 | 3   |
| 14 | 86 | 4 | 2 | 2 | 1 | 0 | 3.5 | 3.5 |
| 42 | 85 | 1 | 3 | 3 | 3 | 0 | 1   | 0   |
| 42 | 80 | 1 | 3 | 3 | 2 | 0 | 2   | 0   |
| 42 | 78 | 2 | 2 | 3 | 2 | 0 | 2   | 0   |
| 15 | 86 | 1 | 3 | 3 | 0 | 0 | 1   | 1   |
| 15 | 77 | 2 | 3 | 3 | 0 | 0 | 1   | 1   |
| 15 | 79 | 2 | 3 | 2 | 0 | 0 | 1   | 1   |
| 15 | 80 | 2 | 2 | 2 | 1 | 1 | 2   | 1   |
| 15 | 61 | 2 | 1 | 1 | 1 | 0 | 2   | 1   |
| 15 | 50 | 2 | 1 | 0 | 0 | 0 | 3   | 1   |
| 33 | 62 | 1 | 2 | 2 | 0 | 0 | 3   | 0.5 |
| 33 | 60 | 2 | 2 | 2 | 0 | 0 | 3   | 1.5 |
| 33 | 50 | 2 | 2 | 2 | 0 | 0 | 3   | 1.5 |
| 34 | 66 | 3 | 2 | 2 | 2 | 3 | 3   | 0.5 |
| 34 | 60 | 3 | 2 | 2 | 2 | 3 | 3.5 | 0.5 |
| 34 | 66 | 3 | 2 | 2 | 2 | 3 | 3.5 | 1   |
| 14 | 55 | 5 | 2 | 3 | 2 | 0 | 2.5 | 1   |
| 14 | 55 | 4 | 2 | 2 | 2 | 0 | 2.5 | 1   |
| 14 | 50 | 4 | 2 | 2 | 2 | 0 | 2.5 | 1.5 |
| 19 | 54 | 2 | 2 | 2 | 2 | 0 | 2.5 | 1   |
| 19 | 50 | 3 | 2 | 2 | 1 | 0 | 2.5 | 1   |
| 19 | 58 | 3 | 2 | 1 | 1 | 0 | 3   | 0.5 |
| 15 | 66 | 3 | 2 | 2 | 2 | 2 | 2.5 | 1.5 |
| 15 | 64 | 3 | 2 | 2 | 2 | 2 | 2.5 | 1.5 |
| 15 | 64 | 3 | 2 | 2 | 2 | 1 | 2.5 | 1   |
| 14 | 87 | 3 | 2 | 2 | 0 | 0 | 1.5 | 1   |
| 14 | 87 | 3 | 1 | 2 | 0 | 0 | 1.5 | 0.5 |

|    |     |   |   |   |   |   |     |     |
|----|-----|---|---|---|---|---|-----|-----|
| 14 | 80  | 3 | 1 | 1 | 0 | 0 | 1.5 | 1.5 |
| 50 | 82  | 3 | 0 | 1 | 1 | 0 | 3.5 | 2   |
| 50 | 80  | 4 | 0 | 1 | 1 | 0 | 3.5 | 2   |
| 50 | 80  | 4 | 0 | 1 | 1 | 0 | 3.5 | 2   |
| 26 | 46  | 2 | 3 | 0 | 0 | 1 | 1   | 1   |
| 26 | 46  | 2 | 3 | 1 | 0 | 0 | 1   | 1   |
| 26 | 50  | 3 | 3 | 0 | 0 | 0 | 1   | 1   |
| 23 | 46  | 4 | 1 | 1 | 1 | 1 | 2   | 0   |
| 23 | 40  | 3 | 1 | 1 | 1 | 1 | 2   | 0   |
| 23 | 48  | 3 | 1 | 1 | 1 | 1 | 2   | 0.5 |
| 30 | 51  | 4 | 2 | 2 | 0 | 0 | 4.5 | 1   |
| 30 | 47  | 3 | 2 | 2 | 0 | 0 | 4   | 1   |
| 30 | 50  | 3 | 2 | 2 | 0 | 0 | 5   | 1   |
| 22 | 54  | 3 | 2 | 2 | 1 | 0 | 3.5 | 0.5 |
| 22 | 54  | 3 | 2 | 2 | 1 | 0 | 4   | 1   |
| 22 | 60  | 3 | 2 | 2 | 1 | 0 | 4   | 1   |
| 26 | 53  | 2 | 2 | 2 | 1 | 0 | 3.5 | 0.5 |
| 26 | 53  | 3 | 2 | 2 | 1 | 0 | 3.5 | 0.5 |
| 26 | 53  | 3 | 2 | 2 | 1 | 0 | 3.5 | 0.5 |
| 42 | 70  | 4 | 3 | 2 | 2 | 1 | 2.5 | 3.5 |
| 42 | 70  | 4 | 3 | 2 | 1 | 0 | 2.5 | 1.5 |
| 42 | 75  | 4 | 3 | 2 | 1 | 0 | 3   | 1   |
| 14 | 48  | 1 | 1 | 1 | 0 | 0 | 4.5 | 2   |
| 14 | 43  | 1 | 1 | 1 | 0 | 0 | 5   | 2   |
| 14 | 43  | 2 | 1 | 1 | 0 | 0 | 5   | 1.5 |
| 29 | 70  | 1 | 2 | 3 | 2 | 1 | 2.5 | 1   |
| 29 | 70  | 2 | 2 | 3 | 2 | 0 | 3   | 1   |
| 29 | 65  | 2 | 1 | 3 | 1 | 0 | 3   | 1   |
| 45 | 114 | 3 | 3 | 3 | 3 | 3 | 2   | 1   |
| 40 | 110 | 3 | 3 | 3 | 3 | 0 | 2   | 0.5 |
| 40 | 110 | 3 | 3 | 3 | 3 | 0 | 2   | 1   |
| 16 | 54  | 2 | 2 | 2 | 2 | 0 | 2.5 | 1.5 |
| 16 | 50  | 2 | 2 | 2 | 2 | 0 | 2.5 | 1.5 |
| 16 | 50  | 2 | 3 | 2 | 2 | 0 | 3   | 1   |















Supplementary Table 2 Metagenome sequencing and assembly statistics

| Sample ID    | Amount of generated data |                  | Assembly results  |                   |                 |                 |                 |
|--------------|--------------------------|------------------|-------------------|-------------------|-----------------|-----------------|-----------------|
|              | Raw data (Gbp)           | Clean data (Gbp) | Number of contigs | Total length (bp) | N50 length (bp) | N90 length (bp) | Max length (bp) |
| Sample_SPA03 | 6.11905                  | 6.02379          | 31362             | 287600850         | 22328           | 2989            | 538687          |
| Sample_SPB03 | 5.39588                  | 5.32104          | 30396             | 253910167         | 17160           | 2871            | 640918          |
| Sample_SPC03 | 4.78865                  | 4.72550          | 28146             | 220323249         | 17408           | 2699            | 670764          |
| Sample_SPA04 | 5.66678                  | 5.62312          | 34023             | 287141009         | 17135           | 2907            | 371797          |
| Sample_SPB04 | 5.30639                  | 5.24031          | 25494             | 170239853         | 10451           | 2587            | 446210          |
| Sample_SPC04 | 5.29330                  | 5.25554          | 29071             | 231274159         | 16240           | 2752            | 1332897         |
| Sample_SPA06 | 7.93244                  | 7.85500          | 30941             | 299952347         | 26392           | 3063            | 561709          |
| Sample_SPB06 | 7.04168                  | 6.96360          | 28443             | 302840408         | 28436           | 3333            | 637343          |
| Sample_SPC06 | 5.27148                  | 5.23029          | 18596             | 180302318         | 25052           | 3101            | 651458          |
| Sample_SPA07 | 4.49438                  | 4.45410          | 24635             | 221539434         | 20723           | 3019            | 534441          |
| Sample_SPB07 | 5.55655                  | 5.49638          | 28422             | 242868936         | 18898           | 2874            | 647783          |
| Sample_SPC07 | 5.93264                  | 5.84309          | 26968             | 270096764         | 27207           | 3165            | 914180          |
| Sample_SPA08 | 4.41275                  | 4.26606          | 34800             | 288405086         | 16985           | 2837            | 613077          |
| Sample_SPB08 | 4.90034                  | 4.80883          | 28422             | 242868936         | 18898           | 2874            | 647783          |
| Sample_SPC08 | 6.14048                  | 6.06589          | 35746             | 296218295         | 16858           | 2863            | 727784          |
| Sample_SPA09 | 5.66873                  | 5.49473          | 29814             | 240826223         | 16153           | 2844            | 631242          |
| Sample_SPB09 | 5.01635                  | 4.97242          | 25288             | 216332907         | 18774           | 2889            | 547901          |
| Sample_SPC09 | 4.25467                  | 4.22283          | 23756             | 199618492         | 17542           | 2884            | 889727          |
| Sample_SPA10 | 4.69581                  | 4.58175          | 14414             | 146501393         | 26855           | 3204            | 516591          |
| Sample_SPB10 | 4.39159                  | 4.16542          | 17604             | 173339557         | 27876           | 3144            | 752205          |
| Sample_SPC10 | 6.21059                  | 5.04686          | 15001             | 151045615         | 30026           | 3080            | 579622          |
| Sample_SPA11 | 5.83793                  | 5.76419          | 31922             | 291858365         | 19226           | 3093            | 584568          |
| Sample_SPB11 | 3.85383                  | 3.82304          | 22205             | 194186373         | 17414           | 3008            | 512289          |
| Sample_SPC11 | 5.63395                  | 5.56997          | 29382             | 286780153         | 23392           | 3185            | 657157          |
| Sample_SPA12 | 4.97186                  | 4.91577          | 52076             | 356691221         | 10473           | 2680            | 528650          |
| Sample_SPB12 | 5.42410                  | 5.38088          | 43355             | 318936801         | 12464           | 2711            | 804386          |
| Sample_SPC12 | 5.00531                  | 4.94353          | 38423             | 303572703         | 14829           | 2813            | 720644          |
| Sample_SPA13 | 5.41307                  | 5.34968          | 20526             | 199474980         | 32832           | 2970            | 514140          |
| Sample_SPB13 | 4.84955                  | 4.80911          | 17762             | 196225198         | 34644           | 3302            | 545232          |
| Sample_SPC13 | 4.59426                  | 4.54097          | 20520             | 225885770         | 38595           | 3229            | 778278          |
| Sample_SPA15 | 6.62812                  | 6.56276          | 31328             | 231478958         | 13270           | 2672            | 588242          |
| Sample_SPB15 | 4.87495                  | 4.82137          | 20389             | 150403900         | 13474           | 2702            | 440108          |
| Sample_SPC15 | 5.08030                  | 5.03515          | 24925             | 184418160         | 12898           | 2702            | 468562          |
| Sample_SPA16 | 6.74309                  | 6.57961          | 28365             | 226882299         | 14153           | 2927            | 604059          |
| Sample_SPB16 | 4.94674                  | 4.42473          | 17534             | 130885947         | 13245           | 2714            | 570725          |
| Sample_SPC16 | 6.57864                  | 6.44286          | 21944             | 179237839         | 16757           | 2839            | 530796          |
| Sample_SPA17 | 5.77959                  | 5.72146          | 16084             | 174978804         | 32372           | 3325            | 640900          |
| Sample_SPB17 | 6.26904                  | 6.20665          | 4098              | 64641746          | 57143           | 4625            | 473258          |
| Sample_SPC17 | 4.98291                  | 4.91383          | 11911             | 143509542         | 32298           | 3912            | 473176          |
| Sample_SPA20 | 4.96702                  | 4.91722          | 17336             | 134367844         | 14097           | 2773            | 392510          |
| Sample_SPB20 | 6.63130                  | 6.56431          | 29588             | 242905031         | 16145           | 2862            | 568666          |
| Sample_SPC20 | 6.29785                  | 6.23142          | 26522             | 206616295         | 14653           | 2799            | 718767          |
| Sample_SPA21 | 5.92004                  | 5.86939          | 31096             | 269935593         | 19417           | 2920            | 588090          |
| Sample_SPB21 | 5.26843                  | 5.21165          | 31513             | 270031679         | 21199           | 2806            | 535190          |
| Sample_SPC21 | 5.14612                  | 5.07907          | 27303             | 248513152         | 23952           | 2912            | 541533          |
| Sample_SPA22 | 7.09997                  | 6.99320          | 38141             | 287623454         | 14539           | 2698            | 546495          |
| Sample_SPB22 | 5.35952                  | 5.29867          | 28695             | 242419471         | 19154           | 2833            | 670013          |
| Sample_SPC22 | 5.20169                  | 5.13825          | 35429             | 311604639         | 20296           | 2943            | 539027          |
| Sample_SPA25 | 5.87692                  | 5.78603          | 26362             | 226191344         | 20439           | 2843            | 601534          |

|              |         |         |       |           |       |      |         |
|--------------|---------|---------|-------|-----------|-------|------|---------|
| Sample_SPB25 | 5.23351 | 5.17066 | 29967 | 242159764 | 15495 | 2837 | 593898  |
| Sample_SPC25 | 5.83388 | 5.78171 | 39574 | 285467168 | 11802 | 2734 | 712304  |
| Sample_SPA26 | 5.03873 | 4.97847 | 32734 | 260977975 | 15758 | 2797 | 563709  |
| Sample_SPB26 | 6.14677 | 6.05499 | 28198 | 263474305 | 23552 | 3003 | 558789  |
| Sample_SPC26 | 6.11784 | 6.04073 | 27476 | 246621985 | 20555 | 2986 | 1002984 |
| Sample_SPA27 | 4.84508 | 4.76920 | 14070 | 139257982 | 21303 | 3400 | 569089  |
| Sample_SPB27 | 5.00797 | 4.95554 | 18871 | 190201333 | 29892 | 3185 | 591822  |
| Sample_SPC27 | 7.04562 | 6.94502 | 20936 | 249409118 | 34460 | 3640 | 582550  |
| Sample_SPA28 | 4.43888 | 4.39652 | 25447 | 186684221 | 12256 | 2742 | 530745  |
| Sample_SPB28 | 5.28296 | 5.09149 | 29633 | 219741453 | 13174 | 2730 | 647641  |
| Sample_SPC28 | 5.53903 | 5.46823 | 26318 | 214393553 | 15421 | 2876 | 673704  |
| Sample_SPA30 | 5.12908 | 5.02513 | 26294 | 210821343 | 16611 | 2805 | 726593  |
| Sample_SPB30 | 5.10252 | 5.04170 | 26899 | 233501616 | 18316 | 2984 | 856709  |
| Sample_SPC30 | 6.21337 | 6.04110 | 25225 | 236724348 | 18212 | 3231 | 526173  |
| Sample_SPA31 | 6.89938 | 6.78475 | 18171 | 165375500 | 24875 | 2871 | 1495245 |
| Sample_SPB31 | 0.30665 | 0.30336 | 27755 | 229325634 | 16692 | 2874 | 505922  |
| Sample_SPC31 | 5.82225 | 5.74211 | 25795 | 212665991 | 17107 | 2828 | 785241  |
| Sample_SPA32 | 5.75777 | 5.64613 | 22744 | 228893932 | 23721 | 3282 | 733045  |
| Sample_SPB32 | 5.52080 | 5.47252 | 16545 | 193456620 | 32369 | 3636 | 732480  |
| Sample_SPC32 | 5.60657 | 5.52733 | 16383 | 181350567 | 31148 | 3382 | 688307  |
| Sample_SPA34 | 5.29960 | 5.23697 | 29248 | 269454600 | 22569 | 3001 | 637805  |
| Sample_SPB34 | 4.78909 | 4.70892 | 30703 | 262138691 | 18110 | 2906 | 689143  |
| Sample_SPC34 | 5.41456 | 5.33344 | 26735 | 230256435 | 21176 | 2852 | 727839  |
| Sample_SPA35 | 5.02834 | 4.96619 | 28641 | 240810518 | 17526 | 2872 | 713013  |
| Sample_SPB35 | 6.37430 | 6.25767 | 28641 | 240810518 | 17526 | 2872 | 713013  |
| Sample_SPC35 | 4.80776 | 4.75310 | 27662 | 248510764 | 24171 | 2855 | 803478  |
| Sample_SPA36 | 5.17088 | 5.12028 | 24773 | 191014725 | 14521 | 2733 | 637637  |
| Sample_SPB36 | 6.08668 | 5.86982 | 31011 | 218090559 | 11890 | 2621 | 385966  |
| Sample_SPC36 | 4.75531 | 4.69854 | 20036 | 168959706 | 17453 | 2867 | 612701  |
| Sample_SPA37 | 4.97749 | 4.92431 | 33603 | 250972268 | 13254 | 2727 | 512656  |
| Sample_SPB37 | 6.21078 | 6.15053 | 30100 | 281356756 | 21618 | 3089 | 737234  |
| Sample_SPC37 | 4.75548 | 4.68911 | 26006 | 210317766 | 15604 | 2815 | 592231  |
| Sample_SPA38 | 6.35352 | 6.29898 | 33862 | 300768361 | 18459 | 3037 | 588540  |
| Sample_SPB38 | 4.87385 | 4.83918 | 23324 | 211738263 | 20418 | 3030 | 528401  |
| Sample_SPC38 | 5.79927 | 5.74806 | 24463 | 210115175 | 19088 | 2872 | 898532  |
| Sample_SPA39 | 6.90167 | 6.79357 | 26820 | 278676431 | 31373 | 3267 | 649968  |
| Sample_SPB39 | 5.62322 | 5.58573 | 29928 | 242904969 | 15345 | 2876 | 691090  |
| Sample_SPC39 | 4.01862 | 3.97120 | 26463 | 227246747 | 19378 | 2903 | 720051  |
| Sample_SPA41 | 5.21061 | 5.15502 | 27894 | 229423557 | 15981 | 2884 | 637625  |
| Sample_SPB41 | 6.41134 | 6.31435 | 25262 | 214911447 | 19633 | 2842 | 599109  |
| Sample_SPC41 | 4.41800 | 4.35426 | 26042 | 194055326 | 14192 | 2678 | 470454  |
| Sample_SPA42 | 4.80907 | 4.76389 | 35647 | 242104533 | 10448 | 2628 | 1025369 |
| Sample_SPB42 | 6.36975 | 6.30231 | 39176 | 296975967 | 13070 | 2784 | 999242  |
| Sample_SPC42 | 5.07576 | 5.02414 | 37546 | 263797147 | 11432 | 2654 | 681630  |
| Sample_SPA45 | 5.15868 | 5.07465 | 30553 | 288564612 | 21825 | 3145 | 610536  |
| Sample_SPB45 | 7.06092 | 6.99089 | 25270 | 231624063 | 22849 | 2970 | 594125  |
| Sample_SPC45 | 4.65015 | 4.58890 | 32037 | 275419778 | 17568 | 2940 | 407948  |
| Sample_SPA47 | 6.45666 | 6.36672 | 26176 | 260916878 | 25494 | 3141 | 638445  |
| Sample_SPB47 | 6.32749 | 6.26077 | 28969 | 274349691 | 21354 | 3125 | 772588  |
| Sample_SPC47 | 4.31934 | 4.19383 | 28315 | 230915240 | 16319 | 2846 | 545984  |
| Sample_LPA01 | 4.95202 | 4.91610 | 26286 | 226506087 | 19056 | 2920 | 687625  |
| Sample_LPB01 | 5.67695 | 5.62033 | 24271 | 214693541 | 19242 | 2976 | 819899  |
| Sample_LPC01 | 5.81072 | 5.76807 | 30101 | 253803772 | 17913 | 2900 | 428691  |
| Sample_LPA02 | 4.92592 | 4.85973 | 37420 | 290625431 | 14664 | 2783 | 672968  |
| Sample_LPB02 | 5.55606 | 5.50548 | 34023 | 285127761 | 18007 | 2868 | 667645  |
| Sample_LPC02 | 5.10960 | 5.07883 | 32589 | 284832936 | 18850 | 2973 | 573420  |

|              |         |         |       |           |       |      |         |
|--------------|---------|---------|-------|-----------|-------|------|---------|
| Sample_LPA03 | 3.56784 | 3.53768 | 15390 | 144775837 | 21763 | 3033 | 575014  |
| Sample_LPB03 | 3.81948 | 3.78623 | 20490 | 188296226 | 20356 | 3013 | 623011  |
| Sample_LPC03 | 5.58913 | 5.54438 | 31542 | 253417541 | 16958 | 2793 | 875092  |
| Sample_LPA04 | 5.54553 | 5.40647 | 23698 | 195352512 | 18602 | 2751 | 564635  |
| Sample_LPB04 | 5.04616 | 5.00140 | 24891 | 227709006 | 20673 | 3057 | 500033  |
| Sample_LPC04 | 5.42732 | 5.37866 | 23962 | 242209248 | 26664 | 3168 | 534856  |
| Sample_LPA05 | 3.03681 | 2.99817 | 29132 | 205485834 | 11152 | 2703 | 545162  |
| Sample_LPB05 | 5.84765 | 5.78552 | 29722 | 272079459 | 21574 | 3013 | 696611  |
| Sample_LPC05 | 6.22720 | 6.17341 | 30605 | 257516672 | 18456 | 2873 | 584318  |
| Sample_LPA08 | 3.39861 | 3.37200 | 14993 | 161381522 | 27327 | 3442 | 725380  |
| Sample_LPB08 | 3.82301 | 3.78752 | 16323 | 167647647 | 26562 | 3270 | 487224  |
| Sample_LPC08 | 2.71452 | 2.69578 | 16277 | 150726907 | 19478 | 3163 | 637475  |
| Sample_YPA1  | 3.54469 | 3.50839 | 3043  | 44256935  | 49540 | 4406 | 615990  |
| Sample_YPB1  | 3.49147 | 3.43547 | 14611 | 154923020 | 36697 | 3230 | 527301  |
| Sample_YPC1  | 3.20038 | 3.14965 | 9838  | 119776911 | 40957 | 3514 | 696195  |
| Sample_YPA2  | 2.99763 | 2.96819 | 27381 | 209852179 | 13362 | 2788 | 675479  |
| Sample_YPB2  | 3.05706 | 3.00736 | 27036 | 221306912 | 16751 | 2816 | 737555  |
| Sample_YPC2  | 3.14535 | 3.08502 | 25024 | 200729173 | 18339 | 2715 | 737509  |
| Sample_YPA3  | 2.76192 | 2.71064 | 15389 | 132482099 | 26648 | 2711 | 1069624 |
| Sample_YPB3  | 3.05539 | 2.98992 | 12669 | 115148665 | 19915 | 3078 | 565635  |
| Sample_YPC3  | 2.94181 | 2.88929 | 14154 | 123165158 | 22673 | 2825 | 753688  |
| Sample_YPA4  | 2.81988 | 2.78296 | 17413 | 143437510 | 21520 | 2718 | 909276  |
| Sample_YPB4  | 3.12534 | 3.07533 | 13033 | 128053043 | 26370 | 3122 | 834859  |
| Sample_YPC4  | 3.49460 | 3.43224 | 22079 | 173100739 | 15696 | 2750 | 909276  |
| Sample_YPA5  | 3.04797 | 3.01843 | 20647 | 207058421 | 28927 | 3089 | 464348  |
| Sample_YPB5  | 2.71121 | 2.66974 | 19458 | 190709821 | 23429 | 3211 | 381643  |
| Sample_YPC5  | 3.12284 | 3.07066 | 21130 | 199447533 | 24951 | 3007 | 493609  |
| Sample_YPA6  | 3.42441 | 3.37704 | 21643 | 166265624 | 14104 | 2753 | 572825  |
| Sample_YPB6  | 2.83400 | 2.80178 | 11139 | 121968998 | 38258 | 3324 | 799050  |
| Sample_YPC6  | 2.85756 | 2.80396 | 21125 | 166053880 | 14513 | 2818 | 575344  |
| Sample_YPA7  | 3.29505 | 3.25941 | 21576 | 204108473 | 23590 | 3073 | 612517  |
| Sample_YPB7  | 3.49932 | 3.42928 | 22680 | 183688045 | 15148 | 2880 | 560875  |
| Sample_YPC7  | 3.02865 | 2.97722 | 21444 | 158535129 | 13681 | 2674 | 909276  |
| Sample_SCA55 | 6.16560 | 6.10961 | 28740 | 221031419 | 14530 | 2739 | 778371  |
| Sample_SCB55 | 6.18423 | 6.10581 | 34915 | 248664164 | 12563 | 2612 | 778381  |
| Sample_SCC55 | 4.59738 | 4.53112 | 22724 | 164798599 | 13877 | 2596 | 778381  |
| Sample_SCA58 | 6.73700 | 6.67523 | 34103 | 287645695 | 18222 | 2866 | 921518  |
| Sample_SCB58 | 6.27298 | 6.20058 | 40618 | 345711137 | 16863 | 2981 | 691450  |
| Sample_SCC58 | 5.57315 | 5.52080 | 31987 | 264411708 | 16458 | 2873 | 477837  |
| Sample_SCA59 | 4.50208 | 4.46951 | 39351 | 306792532 | 14609 | 2784 | 743981  |
| Sample_SCB59 | 5.18800 | 5.12868 | 39530 | 312561966 | 15320 | 2795 | 832455  |
| Sample_SCC59 | 2.77841 | 2.75937 | 27882 | 201502233 | 12410 | 2682 | 411272  |
| Sample_SCA60 | 5.43013 | 5.38058 | 34550 | 264425856 | 14829 | 2727 | 416625  |
| Sample_SCB60 | 6.59234 | 6.44059 | 35138 | 294459219 | 17422 | 2886 | 552690  |
| Sample_SCC60 | 5.29149 | 5.15822 | 32287 | 252608786 | 15435 | 2773 | 493566  |
| Sample_SCA61 | 6.11455 | 6.02166 | 21170 | 213322483 | 23793 | 3282 | 675371  |
| Sample_SCB61 | 6.26271 | 6.20607 | 20989 | 217119614 | 27117 | 3238 | 688370  |
| Sample_SCC61 | 5.86879 | 5.81642 | 16634 | 191653159 | 33008 | 3489 | 688153  |
| Sample_SCA64 | 4.63295 | 4.59869 | 18803 | 210123166 | 32386 | 3453 | 739522  |
| Sample_SCB64 | 5.54598 | 5.48302 | 25604 | 241819901 | 21843 | 3133 | 749244  |
| Sample_SCC64 | 4.91693 | 4.85065 | 16469 | 175032706 | 32259 | 3246 | 558487  |
| Sample_SCA65 | 6.31261 | 6.24944 | 22889 | 204311165 | 22517 | 2892 | 519561  |
| Sample_SCB65 | 5.10966 | 5.05709 | 20735 | 187572756 | 22464 | 2936 | 533258  |
| Sample_SCC65 | 3.97393 | 3.93438 | 18219 | 163902622 | 25447 | 2847 | 539740  |
| Sample_SCA66 | 5.29863 | 5.24365 | 26010 | 221002250 | 18464 | 2887 | 648588  |
| Sample_SCB66 | 5.22126 | 5.13344 | 25396 | 243699695 | 21512 | 3181 | 606694  |

|              |         |         |       |           |       |      |         |
|--------------|---------|---------|-------|-----------|-------|------|---------|
| Sample_SCC66 | 4.97205 | 4.92579 | 29311 | 250032514 | 17130 | 2944 | 602763  |
| Sample_SCA67 | 5.84483 | 5.78412 | 38352 | 258620913 | 10501 | 2615 | 609133  |
| Sample_SCB67 | 6.21176 | 6.12640 | 45018 | 324113458 | 11959 | 2723 | 649447  |
| Sample_SCC67 | 4.60453 | 4.56204 | 38172 | 260530148 | 10503 | 2650 | 495751  |
| Sample_SCA68 | 5.00330 | 4.89207 | 21601 | 176219759 | 18326 | 2784 | 416167  |
| Sample_SCB68 | 5.71359 | 5.67924 | 18925 | 152898609 | 16945 | 2830 | 372379  |
| Sample_SCC68 | 4.65627 | 4.61367 | 22593 | 170921862 | 13404 | 2773 | 397531  |
| Sample_SCA69 | 6.03514 | 5.93103 | 26332 | 231723996 | 20322 | 2935 | 424840  |
| Sample_SCB69 | 6.43796 | 6.34207 | 28539 | 264111796 | 22415 | 3000 | 467102  |
| Sample_SCC69 | 6.24317 | 6.17781 | 22552 | 197598242 | 23505 | 2833 | 392926  |
| Sample_SCA70 | 5.17107 | 5.10476 | 40010 | 296033288 | 13960 | 2653 | 319191  |
| Sample_SCB70 | 5.10562 | 5.06185 | 31566 | 252977971 | 15504 | 2812 | 437715  |
| Sample_SCC70 | 4.17968 | 4.13227 | 31625 | 256171187 | 16791 | 2813 | 772168  |
| Sample_LCA09 | 5.86811 | 5.82479 | 26496 | 246121050 | 20855 | 3109 | 566805  |
| Sample_LCB09 | 5.40434 | 5.34145 | 21834 | 204018319 | 19428 | 3203 | 516264  |
| Sample_LCC09 | 6.99543 | 6.93432 | 27893 | 264542425 | 22013 | 3122 | 784595  |
| Sample_LCA10 | 3.94486 | 3.89814 | 12937 | 161816777 | 35798 | 3982 | 704097  |
| Sample_LCB10 | 5.37054 | 5.30861 | 23480 | 221129530 | 22948 | 3067 | 566783  |
| Sample_LCC10 | 5.01276 | 4.68807 | 19876 | 195740550 | 25270 | 3099 | 566785  |
| Sample_LCA11 | 5.88014 | 5.81806 | 29219 | 262969582 | 21038 | 2965 | 612280  |
| Sample_LCB11 | 3.53140 | 3.50877 | 21492 | 188671639 | 19670 | 2916 | 603123  |
| Sample_LCC11 | 4.56206 | 4.53279 | 23889 | 174512500 | 11767 | 2763 | 432633  |
| Sample_LCA12 | 5.76344 | 5.71106 | 38729 | 336269038 | 18831 | 2935 | 502089  |
| Sample_LCB12 | 5.61032 | 5.55313 | 37675 | 306108709 | 15518 | 2879 | 714828  |
| Sample_LCC12 | 5.84876 | 5.79452 | 32642 | 239502485 | 14590 | 2623 | 501974  |
| Sample_LCA13 | 5.57239 | 5.43423 | 29852 | 257631488 | 20535 | 2832 | 606829  |
| Sample_LCB13 | 5.11191 | 5.07214 | 28908 | 258953916 | 21726 | 2944 | 768510  |
| Sample_LCC13 | 4.80126 | 4.76368 | 29142 | 257353356 | 20423 | 2948 | 873667  |
| Sample_LCA14 | 4.81958 | 4.67082 | 12849 | 149951394 | 36761 | 3540 | 841953  |
| Sample_LCB14 | 5.70649 | 5.66741 | 11910 | 153017382 | 43384 | 3860 | 931079  |
| Sample_LCC14 | 6.06208 | 6.01939 | 14115 | 159568629 | 33985 | 3460 | 1135479 |
| Sample_LCA15 | 4.88008 | 4.85734 | 13736 | 137522989 | 27703 | 3114 | 595262  |
| Sample_LCB15 | 5.72317 | 5.68147 | 9797  | 96944063  | 24365 | 3177 | 435789  |
| Sample_LCC15 | 3.77199 | 3.75584 | 14297 | 62676084  | 4662  | 2332 | 138378  |
| Sample_LCA16 | 5.19521 | 5.14576 | 21549 | 183421882 | 19672 | 2840 | 532124  |
| Sample_LCB16 | 5.79259 | 5.75604 | 13978 | 136109476 | 21362 | 3241 | 680236  |
| Sample_LCC16 | 5.49451 | 5.45521 | 10363 | 99334334  | 29678 | 3014 | 683062  |
| Sample_LCA17 | 4.86522 | 4.84350 | 25575 | 210900324 | 16688 | 2893 | 372928  |
| Sample_LCB17 | 5.78310 | 5.74656 | 31978 | 282138117 | 22896 | 2884 | 498784  |
| Sample_LCC17 | 7.51697 | 7.44964 | 34214 | 286350295 | 17088 | 2889 | 570219  |
| Sample_LCA19 | 5.46298 | 5.43028 | 17550 | 170136065 | 23547 | 3155 | 687809  |
| Sample_LCB19 | 5.83150 | 5.78767 | 17373 | 173794512 | 28750 | 3070 | 655697  |
| Sample_LCC19 | 5.64435 | 5.61510 | 18153 | 175547771 | 23148 | 3214 | 615950  |
| Sample_LCA20 | 5.45989 | 5.40579 | 18308 | 187706392 | 22985 | 3417 | 596940  |
| Sample_LCB20 | 4.89808 | 4.87453 | 21826 | 178289311 | 17640 | 2809 | 597183  |
| Sample_LCC20 | 5.57042 | 5.52573 | 21973 | 187344340 | 18953 | 2856 | 625817  |
| Sample_LCA21 | 5.02321 | 4.97515 | 27085 | 225652776 | 18675 | 2814 | 393533  |
| Sample_LCB21 | 4.86050 | 4.82928 | 27447 | 230255405 | 18526 | 2840 | 533517  |
| Sample_LCC21 | 3.55386 | 3.52532 | 27854 | 194542321 | 11096 | 2656 | 650607  |
| Sample_LCA22 | 5.89769 | 5.85144 | 27894 | 236031107 | 17020 | 2946 | 663631  |
| Sample_LCB22 | 6.13303 | 6.08032 | 27951 | 242383383 | 18558 | 2941 | 549211  |
| Sample_LCC22 | 5.80640 | 5.76945 | 26556 | 233359388 | 19274 | 2985 | 549211  |
| Sample_LCA23 | 5.66367 | 5.61054 | 23844 | 211270894 | 19282 | 2989 | 649551  |
| Sample_LCB23 | 5.91758 | 5.87234 | 25059 | 219028742 | 18734 | 3000 | 673543  |
| Sample_LCC23 | 5.49954 | 5.46784 | 27438 | 215171213 | 14549 | 2835 | 649890  |
| Sample_LCA24 | 2.06275 | 2.05399 | 11744 | 107543484 | 22137 | 3009 | 464477  |

|              |         |         |       |           |       |      |        |
|--------------|---------|---------|-------|-----------|-------|------|--------|
| Sample_LCB24 | 5.67757 | 5.64406 | 20282 | 179152636 | 20649 | 2966 | 389762 |
| Sample_LCC24 | 3.50606 | 3.48863 | 18111 | 159392974 | 18871 | 2984 | 472566 |
| Sample_LCA25 | 5.30054 | 5.25982 | 14284 | 135142719 | 23713 | 3071 | 736183 |
| Sample_LCB25 | 7.54966 | 7.48044 | 14293 | 157918983 | 29582 | 3554 | 736183 |
| Sample_LCC25 | 5.74066 | 5.69490 | 15394 | 144118870 | 23151 | 3132 | 736183 |

Supplementary Table 3 Genomic information of 7538 high-quality metagenome-assembled genomes (MAGs)

| MAG ID                          | Completeness (%) | Contamination (%) | Number of contigs |
|---------------------------------|------------------|-------------------|-------------------|
| Sample_LCA09.Cluster12306       | 92.41            | 4.494             | 7                 |
| Sample_LCA09.Cluster1389cbin.1  | 94.35            | 0.806             | 105               |
| Sample_LCA09.Cluster103         | 89.76            | 4.026             | 55                |
| Sample_LCA09.Cluster29cbin.1    | 86.25            | 3.467             | 244               |
| Sample_LCA09.Cluster9849cbin.1  | 85.76            | 2.908             | 334               |
| Sample_LCA09.Cluster3712cbin.1  | 97.04            | 1.265             | 61                |
| Sample_LCA09.Cluster3578        | 97.31            | 0.000             | 38                |
| Sample_LCA09.mb.109             | 95.30            | 2.684             | 137               |
| Sample_LCA09.mb.101cbin.1       | 93.95            | 4.138             | 74                |
| Sample_LCA09.Cluster1791        | 94.96            | 0.000             | 11                |
| Sample_LCA09.mb.39cbin.1        | 88.50            | 1.148             | 245               |
| Sample_LCA09.mb.16cbin.1        | 97.31            | 0.826             | 147               |
| Sample_LCA09.Cluster770cbin.1   | 94.93            | 2.003             | 334               |
| Sample_LCA09.Cluster11946cbin.1 | 99.47            | 0.000             | 23                |
| Sample_LCA09.mb.10              | 93.19            | 0.680             | 212               |
| Sample_LCA09.Cluster9301        | 99.32            | 0.671             | 16                |
| Sample_LCA09.mb.2cbin.1         | 97.76            | 0.671             | 88                |
| Sample_LCA09.Cluster11194cbin.1 | 97.98            | 0.041             | 54                |
| Sample_LCA09.Cluster961         | 98.18            | 0.303             | 22                |
| Sample_LCA09.mb.53cbin.1        | 92.93            | 2.013             | 52                |
| Sample_LCA09.mb.127             | 87.07            | 0.566             | 72                |
| Sample_LCA09.Cluster74cbin.1    | 97.69            | 1.900             | 43                |
| Sample_LCA09.mb.73              | 96.64            | 1.565             | 183               |
| Sample_LCA09.mb.103             | 98.00            | 3.743             | 65                |
| Sample_LCA09.mb.15cbin.1        | 96.93            | 2.013             | 29                |
| Sample_LCA09.mb.45              | 90.25            | 2.684             | 306               |
| Sample_LCA09.mb.75              | 96.81            | 2.684             | 91                |
| Sample_LCA09.mb.17cbin.1        | 95.89            | 3.424             | 28                |
| Sample_LCA09.mb.106cbin.1       | 99.27            | 3.846             | 32                |
| Sample_LCA09.mb.66              | 84.84            | 2.531             | 183               |
| Sample_LCA09.mb.79              | 97.76            | 0.000             | 73                |
| Sample_LCA09.mb.82cbin.1        | 80.44            | 0.335             | 47                |
| Sample_LCA09.Cluster3917        | 98.58            | 3.923             | 43                |
| Sample_LCA09.mb.31cbin.1        | 98.65            | 0.000             | 47                |
| Sample_LCA09.mb.99              | 86.57            | 2.726             | 119               |
| Sample_LCA09.Cluster1997        | 97.69            | 0.128             | 57                |
| Sample_LCA09.mb.64              | 94.47            | 2.073             | 141               |
| Sample_LCA09.Cluster2032        | 96.23            | 0.537             | 222               |
| Sample_LCA09.Cluster6035cbin.1  | 97.88            | 1.610             | 75                |
| Sample_LCA09.Cluster9790cbin.1  | 92.48            | 1.127             | 123               |
| Sample_LCA09.mb.86cbin.1        | 95.75            | 3.955             | 114               |
| Sample_LCA09.mb.63              | 99.36            | 0.316             | 218               |
| Sample_LCA09.mb.98cbin.1        | 98.79            | 0.724             | 86                |
| Sample_LCA10.mb.27cbin.1        | 96.49            | 4.465             | 415               |
| Sample_LCA10.Cluster26cbin.1    | 80.06            | 0.671             | 281               |
| Sample_LCA10.Cluster330cbin.1   | 97.65            | 0.389             | 125               |
| Sample_LCA10.Cluster54          | 100.00           | 0.000             | 17                |
| Sample_LCA10.mb.10              | 92.61            | 2.013             | 29                |
| Sample_LCA10.Cluster1853cbin.1  | 98.31            | 1.054             | 73                |
| Sample_LCA10.Cluster2071cbin.1  | 99.18            | 0.000             | 21                |
| Sample_LCA10.Cluster140         | 97.98            | 0.713             | 28                |
| Sample_LCA10.mb.18              | 94.63            | 1.677             | 63                |
| Sample_LCA10.mb.32cbin.1        | 98.73            | 0.021             | 112               |
| Sample_LCA10.mb.1               | 97.95            | 0.680             | 242               |



|                                 |        |       |     |
|---------------------------------|--------|-------|-----|
| Sample_LCA10.Cluster1516cbin.1  | 93.91  | 0.000 | 11  |
| Sample_LCA10.mb.60cbin.1        | 87.90  | 0.806 | 36  |
| Sample_LCA10.Cluster160cbin.1   | 92.15  | 1.041 | 264 |
| Sample_LCA10.mb.51cbin.1        | 91.82  | 0.961 | 32  |
| Sample_LCA10.mb.52              | 88.83  | 0.226 | 232 |
| Sample_LCA10.mb.47              | 94.23  | 0.026 | 44  |
| Sample_LCA10.Cluster63          | 99.53  | 0.000 | 21  |
| Sample_LCA10.mb.55cbin.1        | 96.31  | 0.000 | 27  |
| Sample_LCA10.Cluster332         | 97.24  | 0.961 | 22  |
| Sample_LCA10.mb.39cbin.1        | 94.06  | 3.735 | 154 |
| Sample_LCA10.mb.37cbin.1        | 99.36  | 0.105 | 191 |
| Sample_LCA10.mb.44cbin.1        | 99.41  | 0.000 | 69  |
| Sample_LCA10.Cluster399         | 99.79  | 1.923 | 23  |
| Sample_LCA10.Cluster2087        | 97.04  | 1.075 | 252 |
| Sample_LCA10.Cluster1830cbin.1  | 98.11  | 0.000 | 240 |
| Sample_LCA10.Cluster1398cbin.1  | 98.71  | 2.848 | 114 |
| Sample_LCA10.mb.48              | 81.82  | 3.295 | 127 |
| Sample_LCA10.Cluster2295cbin.1  | 99.03  | 0.384 | 63  |
| Sample_LCA10.mb.67              | 99.07  | 0.037 | 62  |
| Sample_LCA11.mb.110cbin.1       | 87.60  | 1.612 | 22  |
| Sample_LCA11.Cluster5845        | 98.52  | 0.000 | 13  |
| Sample_LCA11.Cluster295         | 92.61  | 1.901 | 45  |
| Sample_LCA11.mb.27              | 90.91  | 0.000 | 81  |
| Sample_LCA11.mb.4               | 92.41  | 2.247 | 49  |
| Sample_LCA11.Cluster7780cbin.1  | 94.14  | 1.796 | 217 |
| Sample_LCA11.Cluster4752        | 81.10  | 2.348 | 15  |
| Sample_LCA11.Cluster10191       | 98.65  | 1.006 | 18  |
| Sample_LCA11.Cluster7430        | 93.95  | 1.342 | 31  |
| Sample_LCA11.Cluster11756cbin.1 | 97.31  | 0.000 | 21  |
| Sample_LCA11.Cluster2198        | 97.27  | 0.000 | 32  |
| Sample_LCA11.Cluster12733cbin.1 | 82.77  | 2.784 | 417 |
| Sample_LCA11.mb.24cbin.1        | 88.29  | 3.243 | 87  |
| Sample_LCA11.mb.113             | 100.00 | 0.000 | 26  |
| Sample_LCA11.mb.22              | 83.21  | 1.342 | 268 |
| Sample_LCA11.mb.74              | 91.57  | 4.131 | 43  |
| Sample_LCA11.Cluster9799cbin.1  | 93.27  | 0.000 | 245 |
| Sample_LCA11.Cluster13155       | 100.00 | 0.943 | 80  |
| Sample_LCA11.mb.37              | 83.44  | 1.677 | 208 |
| Sample_LCA11.mb.39cbin.1        | 94.94  | 4.496 | 185 |
| Sample_LCA11.mb.60cbin.1        | 82.38  | 1.367 | 176 |
| Sample_LCA11.mb.88              | 80.02  | 1.342 | 22  |
| Sample_LCA11.Cluster6942cbin.1  | 95.34  | 0.537 | 468 |
| Sample_LCA11.Cluster9181cbin.1  | 97.15  | 1.265 | 461 |
| Sample_LCA11.mb.96              | 92.95  | 1.006 | 44  |
| Sample_LCA11.mb.44              | 95.49  | 0.335 | 83  |
| Sample_LCA11.Cluster6646        | 95.64  | 0.000 | 44  |
| Sample_LCA11.mb.62cbin.1        | 87.34  | 1.886 | 197 |
| Sample_LCA11.mb.89cbin.1        | 97.04  | 2.109 | 240 |
| Sample_LCA11.mb.85cbin.1        | 87.02  | 0.671 | 60  |
| Sample_LCA11.Cluster9182cbin.1  | 97.83  | 0.897 | 94  |
| Sample_LCA11.mb.29cbin.1        | 89.26  | 0.991 | 74  |
| Sample_LCA11.mb.105cbin.1       | 99.24  | 0.188 | 72  |
| Sample_LCA11.mb.81cbin.1        | 98.85  | 4.967 | 112 |
| Sample_LCA11.mb.55              | 88.14  | 1.951 | 184 |
| Sample_LCA11.Cluster4813cbin.1  | 98.67  | 0.192 | 57  |
| Sample_LCA11.mb.75              | 96.47  | 0.660 | 303 |
| Sample_LCA12.Cluster17512       | 85.81  | 0.111 | 108 |
| Sample_LCA12.Cluster10145       | 96.64  | 0.000 | 23  |

|                                 |       |       |     |
|---------------------------------|-------|-------|-----|
| Sample_LCA12.Cluster16605       | 87.24 | 0.000 | 44  |
| Sample_LCA12.Cluster6897cbin.1  | 96.37 | 0.000 | 16  |
| Sample_LCA12.mb.139cbin.1       | 91.29 | 1.685 | 27  |
| Sample_LCA12.mb.111             | 99.30 | 1.165 | 95  |
| Sample_LCA12.mb.136             | 98.38 | 0.000 | 41  |
| Sample_LCA12.Cluster4404cbin.1  | 95.94 | 0.371 | 41  |
| Sample_LCA12.mb.3               | 91.57 | 2.247 | 26  |
| Sample_LCA12.Cluster12909       | 84.56 | 0.000 | 38  |
| Sample_LCA12.Cluster3695cbin.1  | 81.25 | 0.480 | 34  |
| Sample_LCA12.Cluster4266cbin.1  | 99.00 | 0.000 | 40  |
| Sample_LCA12.mb.116             | 92.44 | 3.243 | 95  |
| Sample_LCA12.Cluster10369       | 97.09 | 0.000 | 26  |
| Sample_LCA12.Cluster3601        | 96.97 | 0.000 | 13  |
| Sample_LCA12.Cluster10cbin.1    | 94.40 | 0.776 | 305 |
| Sample_LCA12.Cluster4880cbin.1  | 92.57 | 0.671 | 27  |
| Sample_LCA12.Cluster9314        | 98.99 | 0.000 | 45  |
| Sample_LCA12.Cluster10866       | 84.62 | 0.000 | 21  |
| Sample_LCA12.Cluster15          | 98.69 | 0.591 | 94  |
| Sample_LCA12.Cluster717         | 97.95 | 1.020 | 86  |
| Sample_LCA12.mb.49              | 90.99 | 2.419 | 87  |
| Sample_LCA12.mb.22              | 86.68 | 3.467 | 149 |
| Sample_LCA12.mb.112             | 98.07 | 1.442 | 20  |
| Sample_LCA12.Cluster13856cbin.1 | 92.05 | 4.856 | 513 |
| Sample_LCA12.mb.124cbin.1       | 94.55 | 2.040 | 297 |
| Sample_LCA12.mb.129cbin.1       | 96.37 | 0.188 | 25  |
| Sample_LCA12.mb.58cbin.1        | 97.84 | 0.000 | 53  |
| Sample_LCA12.mb.110             | 87.34 | 0.099 | 72  |
| Sample_LCA12.Cluster8154cbin.1  | 97.97 | 2.646 | 95  |
| Sample_LCA12.mb.43              | 89.53 | 2.013 | 94  |
| Sample_LCA12.mb.52cbin.1        | 88.36 | 1.845 | 100 |
| Sample_LCA12.mb.4               | 96.04 | 0.894 | 158 |
| Sample_LCA12.Cluster7146cbin.1  | 96.77 | 1.254 | 313 |
| Sample_LCA12.mb.88              | 90.82 | 2.013 | 28  |
| Sample_LCA12.mb.83              | 88.43 | 2.796 | 158 |
| Sample_LCA12.mb.67              | 89.74 | 0.000 | 38  |
| Sample_LCA12.mb.25cbin.1        | 83.04 | 0.000 | 58  |
| Sample_LCA12.mb.95              | 90.60 | 0.000 | 35  |
| Sample_LCA12.mb.85              | 95.65 | 0.640 | 64  |
| Sample_LCA12.mb.65cbin.1        | 99.19 | 1.612 | 63  |
| Sample_LCA12.mb.34              | 80.12 | 0.290 | 80  |
| Sample_LCA12.mb.46              | 95.50 | 0.721 | 63  |
| Sample_LCA12.mb.6               | 98.65 | 0.335 | 44  |
| Sample_LCA12.mb.78              | 92.17 | 1.082 | 110 |
| Sample_LCA12.mb.79cbin.1        | 98.88 | 0.370 | 42  |
| Sample_LCA12.mb.143             | 94.72 | 2.756 | 340 |
| Sample_LCA12.mb.76              | 96.09 | 0.671 | 74  |
| Sample_LCA12.mb.97              | 98.23 | 0.961 | 38  |
| Sample_LCA12.mb.69              | 97.76 | 2.560 | 60  |
| Sample_LCA12.Cluster3297cbin.1  | 96.86 | 4.787 | 288 |
| Sample_LCA12.mb.42cbin.1        | 98.33 | 0.128 | 167 |
| Sample_LCA12.mb.47cbin.1        | 96.82 | 4.615 | 111 |
| Sample_LCA12.Cluster256cbin.1   | 94.52 | 0.827 | 125 |
| Sample_LCA13.Cluster6321cbin.1  | 95.69 | 1.075 | 43  |
| Sample_LCA13.Cluster450cbin.1   | 80.01 | 0.732 | 55  |
| Sample_LCA13.Cluster63cbin.1    | 86.88 | 1.677 | 41  |
| Sample_LCA13.mb.105             | 90.62 | 2.848 | 362 |
| Sample_LCA13.mb.14cbin.1        | 84.67 | 4.215 | 252 |
| Sample_LCA13.Cluster97cbin.1    | 87.45 | 3.225 | 192 |

|                                 |       |       |     |
|---------------------------------|-------|-------|-----|
| Sample_LCA13.Cluster5880        | 93.99 | 0.748 | 81  |
| Sample_LCA13.Cluster4024        | 94.26 | 1.342 | 9   |
| Sample_LCA13.mb.118             | 86.40 | 1.510 | 110 |
| Sample_LCA13.mb.110cbin.1       | 87.71 | 1.400 | 359 |
| Sample_LCA13.mb.27              | 85.19 | 3.914 | 211 |
| Sample_LCA13.Cluster11949       | 99.32 | 1.006 | 27  |
| Sample_LCA13.Cluster5089cbin.1  | 96.26 | 1.677 | 42  |
| Sample_LCA13.Cluster9916cbin.1  | 97.98 | 0.335 | 45  |
| Sample_LCA13.Cluster28          | 96.92 | 0.591 | 71  |
| Sample_LCA13.mb.66              | 97.09 | 0.000 | 39  |
| Sample_LCA13.mb.53              | 82.52 | 1.565 | 290 |
| Sample_LCA13.mb.19              | 94.63 | 0.559 | 153 |
| Sample_LCA13.Cluster10737       | 96.57 | 0.000 | 28  |
| Sample_LCA13.Cluster57          | 99.94 | 0.000 | 34  |
| Sample_LCA13.mb.4               | 87.11 | 3.766 | 374 |
| Sample_LCA13.mb.22cbin.1        | 95.11 | 0.961 | 107 |
| Sample_LCA13.mb.36              | 99.20 | 0.000 | 92  |
| Sample_LCA13.mb.61              | 89.93 | 0.000 | 37  |
| Sample_LCA13.Cluster3740cbin.1  | 97.54 | 4.310 | 228 |
| Sample_LCA13.Cluster9471        | 96.28 | 0.362 | 181 |
| Sample_LCA13.mb.74              | 89.55 | 1.510 | 59  |
| Sample_LCA13.mb.107             | 97.31 | 2.684 | 60  |
| Sample_LCA13.mb.116             | 98.24 | 0.000 | 58  |
| Sample_LCA13.mb.86              | 95.30 | 0.671 | 45  |
| Sample_LCA13.mb.63              | 91.82 | 4.195 | 255 |
| Sample_LCA13.mb.109             | 98.49 | 0.377 | 44  |
| Sample_LCA13.mb.65              | 86.06 | 1.360 | 372 |
| Sample_LCA13.mb.78              | 99.03 | 1.698 | 83  |
| Sample_LCA13.mb.90cbin.1        | 90.36 | 4.823 | 135 |
| Sample_LCA13.Cluster8570        | 98.65 | 0.384 | 33  |
| Sample_LCA13.Cluster12558cbin.1 | 96.52 | 1.321 | 106 |
| Sample_LCA13.mb.102cbin.1       | 95.73 | 2.537 | 186 |
| Sample_LCA13.mb.44              | 97.85 | 1.538 | 150 |
| Sample_LCA13.mb.9cbin.1         | 99.46 | 0.000 | 67  |
| Sample_LCA13.mb.67              | 98.14 | 1.115 | 30  |
| Sample_LCA13.Cluster1780cbin.1  | 97.17 | 2.109 | 320 |
| Sample_LCA13.mb.100cbin.1       | 96.98 | 0.939 | 173 |
| Sample_LCA14.Cluster1346        | 93.95 | 0.832 | 16  |
| Sample_LCA14.Cluster2622        | 99.18 | 0.000 | 25  |
| Sample_LCA14.Cluster1004        | 95.30 | 0.000 | 29  |
| Sample_LCA14.Cluster815cbin.1   | 87.87 | 4.026 | 80  |
| Sample_LCA14.mb.51              | 94.63 | 0.020 | 32  |
| Sample_LCA14.mb.61cbin.1        | 97.31 | 0.000 | 56  |
| Sample_LCA14.Cluster4930        | 97.90 | 0.000 | 44  |
| Sample_LCA14.Cluster1036cbin.1  | 99.18 | 0.546 | 63  |
| Sample_LCA14.Cluster351cbin.1   | 98.80 | 0.000 | 70  |
| Sample_LCA14.Cluster5           | 99.65 | 0.460 | 75  |
| Sample_LCA14.mb.67              | 92.51 | 0.680 | 213 |
| Sample_LCA14.mb.22              | 99.22 | 0.000 | 9   |
| Sample_LCA14.Cluster964cbin.1   | 87.49 | 0.065 | 568 |
| Sample_LCA14.Cluster308cbin.1   | 95.23 | 0.226 | 38  |
| Sample_LCA14.mb.2               | 94.47 | 0.704 | 170 |
| Sample_LCA14.mb.26              | 83.63 | 3.990 | 99  |
| Sample_LCA14.Cluster362         | 98.79 | 0.480 | 20  |
| Sample_LCA14.mb.14              | 92.39 | 0.000 | 57  |
| Sample_LCA14.Cluster1967cbin.1  | 96.65 | 0.000 | 35  |
| Sample_LCA14.mb.15cbin.1        | 92.56 | 0.000 | 34  |
| Sample_LCA14.mb.65cbin.1        | 97.36 | 0.705 | 226 |

|                                |       |       |     |
|--------------------------------|-------|-------|-----|
| Sample_LCA14.mb.12             | 93.70 | 4.162 | 531 |
| Sample_LCA14.mb.60             | 97.06 | 2.824 | 27  |
| Sample_LCA15.mb.47             | 94.62 | 0.000 | 70  |
| Sample_LCA15.mb.39cbin.1       | 85.43 | 2.684 | 260 |
| Sample_LCA15.mb.46             | 99.32 | 0.671 | 32  |
| Sample_LCA15.Cluster1357cbin.1 | 94.51 | 0.632 | 35  |
| Sample_LCA15.mb.24             | 98.10 | 0.000 | 80  |
| Sample_LCA15.mb.53cbin.1       | 82.20 | 0.680 | 353 |
| Sample_LCA15.mb.12             | 97.31 | 0.000 | 10  |
| Sample_LCA15.Cluster1569       | 91.61 | 1.497 | 54  |
| Sample_LCA15.mb.20cbin.1       | 97.34 | 0.680 | 268 |
| Sample_LCA15.Cluster3639       | 99.32 | 0.671 | 15  |
| Sample_LCA15.Cluster2898cbin.1 | 88.62 | 1.971 | 393 |
| Sample_LCA15.Cluster41cbin.1   | 89.65 | 1.670 | 295 |
| Sample_LCA15.mb.1              | 84.03 | 2.674 | 112 |
| Sample_LCA15.mb.45cbin.1       | 98.48 | 0.000 | 39  |
| Sample_LCA15.Cluster5216cbin.1 | 97.31 | 0.000 | 30  |
| Sample_LCA15.mb.18cbin.1       | 90.69 | 2.531 | 126 |
| Sample_LCA15.Cluster3291       | 97.74 | 0.000 | 63  |
| Sample_LCA15.mb.48             | 89.88 | 1.107 | 101 |
| Sample_LCA15.mb.69             | 90.56 | 1.509 | 119 |
| Sample_LCA15.mb.59             | 88.40 | 0.724 | 40  |
| Sample_LCA15.Cluster1253cbin.1 | 95.92 | 0.867 | 75  |
| Sample_LCA15.mb.33             | 95.98 | 1.486 | 152 |
| Sample_LCA15.Cluster753cbin.1  | 97.73 | 1.981 | 209 |
| Sample_LCA15.mb.61cbin.1       | 96.87 | 0.409 | 45  |
| Sample_LCA15.Cluster35         | 89.05 | 0.768 | 51  |
| Sample_LCA16.Cluster2110       | 96.77 | 0.000 | 47  |
| Sample_LCA16.mb.26             | 93.93 | 1.342 | 37  |
| Sample_LCA16.mb.32cbin.1       | 99.30 | 1.398 | 136 |
| Sample_LCA16.Cluster1219       | 89.23 | 2.027 | 363 |
| Sample_LCA16.Cluster252cbin.1  | 93.91 | 2.702 | 77  |
| Sample_LCA16.mb.13             | 96.13 | 2.460 | 54  |
| Sample_LCA16.Cluster6403cbin.1 | 92.56 | 1.789 | 234 |
| Sample_LCA16.mb.56             | 96.97 | 0.335 | 99  |
| Sample_LCA16.Cluster7169       | 97.98 | 0.671 | 22  |
| Sample_LCA16.mb.14cbin.1       | 85.43 | 0.335 | 263 |
| Sample_LCA16.mb.29             | 98.97 | 0.984 | 108 |
| Sample_LCA16.mb.61             | 97.31 | 0.000 | 15  |
| Sample_LCA16.mb.75cbin.1       | 98.14 | 0.509 | 59  |
| Sample_LCA16.mb.6              | 99.32 | 0.000 | 26  |
| Sample_LCA16.Cluster2784cbin.1 | 81.76 | 3.763 | 695 |
| Sample_LCA16.Cluster4602       | 99.24 | 0.000 | 27  |
| Sample_LCA16.Cluster3983cbin.1 | 94.05 | 0.185 | 27  |
| Sample_LCA16.Cluster7377       | 99.62 | 0.187 | 26  |
| Sample_LCA16.mb.9cbin.1        | 99.51 | 0.724 | 67  |
| Sample_LCA16.Cluster3119cbin.1 | 94.62 | 2.150 | 376 |
| Sample_LCA16.mb.12cbin.1       | 89.50 | 1.923 | 576 |
| Sample_LCA16.Cluster777cbin.1  | 99.31 | 1.128 | 104 |
| Sample_LCA16.mb.1cbin.1        | 98.75 | 0.551 | 53  |
| Sample_LCA17.mb.41cbin.1       | 97.84 | 0.000 | 97  |
| Sample_LCA17.mb.49             | 80.48 | 1.342 | 242 |
| Sample_LCA17.Cluster8456cbin.1 | 97.98 | 0.518 | 95  |
| Sample_LCA17.Cluster550cbin.1  | 92.61 | 4.316 | 88  |
| Sample_LCA17.Cluster3336cbin.1 | 84.59 | 0.925 | 216 |
| Sample_LCA17.Cluster2742cbin.1 | 92.42 | 0.000 | 58  |
| Sample_LCA17.Cluster8642cbin.1 | 92.61 | 0.671 | 15  |
| Sample_LCA17.mb.88             | 92.41 | 1.123 | 41  |

|                                 |       |       |     |
|---------------------------------|-------|-------|-----|
| Sample_LCA17.mb.70              | 97.90 | 1.165 | 104 |
| Sample_LCA17.mb.62cbin.1        | 85.41 | 0.447 | 278 |
| Sample_LCA17.mb.56cbin.1        | 91.55 | 2.348 | 233 |
| Sample_LCA17.Cluster10970cbin.1 | 93.30 | 4.107 | 423 |
| Sample_LCA17.mb.60cbin.1        | 89.66 | 0.671 | 40  |
| Sample_LCA17.mb.46              | 83.86 | 1.442 | 427 |
| Sample_LCA17.mb.96              | 97.58 | 0.000 | 44  |
| Sample_LCA17.mb.22cbin.1        | 96.90 | 1.303 | 175 |
| Sample_LCA17.mb.38cbin.1        | 90.86 | 2.884 | 56  |
| Sample_LCA17.Cluster49cbin.1    | 88.99 | 0.966 | 437 |
| Sample_LCA17.mb.54cbin.1        | 97.58 | 3.019 | 69  |
| Sample_LCA17.mb.58              | 98.79 | 1.442 | 84  |
| Sample_LCA17.Cluster8124cbin.1  | 99.51 | 2.608 | 152 |
| Sample_LCA17.Cluster8958cbin.1  | 97.35 | 3.207 | 198 |
| Sample_LCA17.mb.61              | 87.92 | 0.000 | 41  |
| Sample_LCA17.mb.24              | 97.44 | 2.798 | 53  |
| Sample_LCA17.mb.76cbin.1        | 97.06 | 0.370 | 82  |
| Sample_LCA17.mb.79cbin.1        | 90.82 | 0.671 | 243 |
| Sample_LCA17.mb.73              | 91.94 | 1.342 | 64  |
| Sample_LCA17.mb.97              | 87.01 | 2.016 | 270 |
| Sample_LCA17.mb.80              | 92.61 | 0.335 | 46  |
| Sample_LCA17.mb.94              | 96.63 | 1.415 | 35  |
| Sample_LCA17.mb.9               | 97.27 | 0.000 | 22  |
| Sample_LCA17.mb.50cbin.1        | 95.16 | 0.000 | 154 |
| Sample_LCA17.mb.74cbin.1        | 89.12 | 3.713 | 174 |
| Sample_LCA17.mb.3cbin.1         | 97.88 | 2.115 | 264 |
| Sample_LCA17.mb.40              | 94.87 | 1.526 | 240 |
| Sample_LCA17.Cluster534cbin.1   | 84.22 | 1.967 | 668 |
| Sample_LCA19.Cluster6802cbin.1  | 86.16 | 1.123 | 147 |
| Sample_LCA19.Cluster1769cbin.1  | 94.62 | 0.000 | 63  |
| Sample_LCA19.Cluster1748        | 81.85 | 1.898 | 30  |
| Sample_LCA19.mb.77cbin.1        | 90.26 | 0.000 | 23  |
| Sample_LCA19.Cluster1073        | 94.96 | 0.000 | 5   |
| Sample_LCA19.Cluster674cbin.1   | 94.39 | 3.365 | 36  |
| Sample_LCA19.mb.41cbin.1        | 87.18 | 3.846 | 375 |
| Sample_LCA19.mb.50cbin.1        | 80.47 | 0.403 | 347 |
| Sample_LCA19.Cluster4112        | 99.32 | 3.355 | 17  |
| Sample_LCA19.Cluster201cbin.1   | 94.89 | 2.040 | 239 |
| Sample_LCA19.Cluster314cbin.1   | 92.50 | 1.770 | 243 |
| Sample_LCA19.mb.60              | 93.98 | 0.000 | 70  |
| Sample_LCA19.mb.88              | 89.21 | 2.777 | 129 |
| Sample_LCA19.Cluster6064        | 97.31 | 0.000 | 26  |
| Sample_LCA19.mb.39cbin.1        | 97.65 | 0.000 | 33  |
| Sample_LCA19.Cluster4036cbin.1  | 97.09 | 0.966 | 100 |
| Sample_LCA19.mb.75cbin.1        | 91.21 | 0.340 | 109 |
| Sample_LCA19.mb.85              | 96.34 | 0.000 | 123 |
| Sample_LCA19.mb.47              | 93.68 | 0.929 | 78  |
| Sample_LCA19.mb.58cbin.1        | 94.72 | 3.415 | 200 |
| Sample_LCA19.mb.48              | 98.11 | 1.257 | 186 |
| Sample_LCA19.Cluster1508        | 86.02 | 0.371 | 67  |
| Sample_LCA19.mb.52              | 85.74 | 4.384 | 253 |
| Sample_LCA19.mb.23cbin.1        | 90.76 | 0.833 | 438 |
| Sample_LCA19.mb.36              | 90.36 | 0.693 | 43  |
| Sample_LCA20.mb.10cbin.1        | 91.57 | 2.247 | 11  |
| Sample_LCA20.mb.30              | 90.66 | 0.000 | 29  |
| Sample_LCA20.mb.57              | 91.57 | 2.247 | 19  |
| Sample_LCA20.Cluster427cbin.1   | 95.45 | 2.564 | 91  |
| Sample_LCA20.mb.34cbin.1        | 93.73 | 0.894 | 41  |

|                                |        |       |     |
|--------------------------------|--------|-------|-----|
| Sample_LCA20.mb.12             | 97.31  | 0.000 | 26  |
| Sample_LCA20.Cluster408        | 90.60  | 0.671 | 82  |
| Sample_LCA20.mb.104            | 83.27  | 0.671 | 97  |
| Sample_LCA20.Cluster1109cbin.1 | 88.03  | 0.000 | 113 |
| Sample_LCA20.mb.59             | 88.96  | 3.164 | 262 |
| Sample_LCA20.Cluster2172cbin.1 | 93.28  | 3.355 | 25  |
| Sample_LCA20.Cluster6765       | 97.09  | 0.000 | 22  |
| Sample_LCA20.Cluster8336cbin.1 | 89.26  | 1.006 | 50  |
| Sample_LCA20.Cluster5171       | 95.63  | 0.335 | 17  |
| Sample_LCA20.mb.1cbin.1        | 92.85  | 1.020 | 224 |
| Sample_LCA20.mb.6cbin.1        | 91.94  | 0.000 | 21  |
| Sample_LCA20.mb.36             | 86.81  | 0.838 | 206 |
| Sample_LCA20.Cluster6794cbin.1 | 99.32  | 2.013 | 26  |
| Sample_LCA20.Cluster2547       | 95.26  | 4.362 | 18  |
| Sample_LCA20.mb.43             | 99.51  | 0.961 | 30  |
| Sample_LCA20.mb.44cbin.1       | 95.91  | 0.000 | 30  |
| Sample_LCA20.Cluster133cbin.1  | 96.15  | 1.682 | 63  |
| Sample_LCA20.mb.13             | 97.31  | 0.671 | 37  |
| Sample_LCA20.mb.7              | 92.46  | 1.013 | 47  |
| Sample_LCA20.mb.75cbin.1       | 100.00 | 0.000 | 48  |
| Sample_LCA20.mb.98             | 87.57  | 2.203 | 428 |
| Sample_LCA20.mb.102            | 99.62  | 0.000 | 19  |
| Sample_LCA20.mb.56             | 82.72  | 2.168 | 184 |
| Sample_LCA20.mb.66cbin.1       | 85.01  | 1.881 | 591 |
| Sample_LCA20.Cluster4859cbin.1 | 96.04  | 1.730 | 360 |
| Sample_LCA20.Cluster2539cbin.1 | 99.37  | 0.210 | 56  |
| Sample_LCA20.mb.55             | 99.35  | 0.079 | 44  |
| Sample_LCA21.mb.26cbin.1       | 94.35  | 1.075 | 74  |
| Sample_LCA21.mb.108            | 91.92  | 2.034 | 273 |
| Sample_LCA21.Cluster3243cbin.1 | 88.14  | 0.074 | 45  |
| Sample_LCA21.Cluster461cbin.1  | 89.70  | 4.697 | 114 |
| Sample_LCA21.mb.35             | 89.93  | 0.838 | 46  |
| Sample_LCA21.mb.10             | 89.87  | 1.898 | 191 |
| Sample_LCA21.Cluster4740       | 94.30  | 1.793 | 46  |
| Sample_LCA21.Cluster3612cbin.1 | 91.77  | 0.021 | 84  |
| Sample_LCA21.Cluster4672cbin.1 | 98.78  | 1.497 | 75  |
| Sample_LCA21.mb.79             | 91.92  | 1.342 | 34  |
| Sample_LCA21.mb.12             | 99.32  | 0.671 | 33  |
| Sample_LCA21.mb.51             | 92.75  | 1.465 | 36  |
| Sample_LCA21.mb.107            | 95.74  | 0.000 | 31  |
| Sample_LCA21.mb.13             | 100.00 | 0.316 | 120 |
| Sample_LCA21.mb.88cbin.1       | 91.72  | 1.342 | 79  |
| Sample_LCA21.Cluster4089cbin.1 | 93.54  | 0.724 | 49  |
| Sample_LCA21.mb.71cbin.1       | 82.90  | 0.671 | 370 |
| Sample_LCA21.mb.61cbin.1       | 93.58  | 0.335 | 24  |
| Sample_LCA21.mb.93             | 88.81  | 0.707 | 96  |
| Sample_LCA21.mb.103cbin.1      | 93.67  | 0.632 | 66  |
| Sample_LCA21.mb.59cbin.1       | 96.97  | 2.181 | 119 |
| Sample_LCA21.mb.98             | 95.80  | 1.510 | 50  |
| Sample_LCA21.mb.21             | 97.46  | 0.105 | 76  |
| Sample_LCA21.mb.9              | 95.49  | 2.995 | 45  |
| Sample_LCA21.mb.17cbin.1       | 89.58  | 3.915 | 133 |
| Sample_LCA21.mb.66cbin.1       | 98.79  | 0.737 | 37  |
| Sample_LCA21.mb.95cbin.1       | 83.06  | 1.578 | 259 |
| Sample_LCA21.mb.90             | 100.00 | 1.499 | 176 |
| Sample_LCA21.mb.99cbin.1       | 98.55  | 1.610 | 67  |
| Sample_LCA21.mb.112cbin.1      | 99.42  | 0.961 | 150 |
| Sample_LCA21.mb.69             | 94.66  | 4.115 | 206 |

|                                |        |       |     |
|--------------------------------|--------|-------|-----|
| Sample_LCA21.mb.67cbin.1       | 89.73  | 4.275 | 366 |
| Sample_LCA21.Cluster5531cbin.1 | 98.95  | 2.581 | 260 |
| Sample_LCA22.Cluster2200       | 96.77  | 0.161 | 33  |
| Sample_LCA22.mb.26             | 91.85  | 1.123 | 88  |
| Sample_LCA22.Cluster2096cbin.1 | 93.98  | 2.900 | 245 |
| Sample_LCA22.Cluster321        | 89.93  | 0.335 | 53  |
| Sample_LCA22.mb.21             | 95.63  | 0.335 | 113 |
| Sample_LCA22.Cluster251        | 100.00 | 0.921 | 30  |
| Sample_LCA22.mb.29             | 93.62  | 0.671 | 37  |
| Sample_LCA22.Cluster3338       | 99.40  | 0.898 | 40  |
| Sample_LCA22.Cluster5574       | 95.97  | 2.013 | 10  |
| Sample_LCA22.mb.79             | 88.88  | 0.854 | 35  |
| Sample_LCA22.Cluster227        | 97.95  | 0.000 | 30  |
| Sample_LCA22.mb.74             | 80.08  | 2.848 | 493 |
| Sample_LCA22.mb.93             | 94.35  | 1.478 | 130 |
| Sample_LCA22.Cluster274cbin.1  | 99.44  | 0.795 | 80  |
| Sample_LCA22.mb.73             | 90.26  | 1.067 | 24  |
| Sample_LCA22.Cluster119cbin.1  | 96.75  | 1.250 | 84  |
| Sample_LCA22.mb.58cbin.1       | 94.85  | 0.000 | 144 |
| Sample_LCA22.mb.20cbin.1       | 81.20  | 1.510 | 23  |
| Sample_LCA22.mb.92             | 93.15  | 1.165 | 286 |
| Sample_LCA22.mb.45             | 91.78  | 2.173 | 64  |
| Sample_LCA22.mb.36cbin.1       | 96.64  | 0.335 | 40  |
| Sample_LCA22.mb.81cbin.1       | 96.07  | 1.201 | 84  |
| Sample_LCA22.mb.44             | 95.65  | 1.690 | 56  |
| Sample_LCA22.Cluster5426cbin.1 | 87.62  | 1.321 | 102 |
| Sample_LCA22.Cluster8517cbin.1 | 98.68  | 3.091 | 104 |
| Sample_LCA22.mb.77             | 95.97  | 0.000 | 14  |
| Sample_LCA22.Cluster3734cbin.1 | 92.22  | 0.537 | 225 |
| Sample_LCA22.mb.51             | 93.45  | 2.215 | 263 |
| Sample_LCA22.mb.33cbin.1       | 98.07  | 0.128 | 89  |
| Sample_LCA22.mb.22cbin.1       | 98.17  | 2.692 | 223 |
| Sample_LCA22.mb.91cbin.1       | 90.38  | 3.141 | 192 |
| Sample_LCA22.mb.15cbin.1       | 99.29  | 0.037 | 54  |
| Sample_LCA23.mb.29cbin.1       | 80.48  | 0.894 | 343 |
| Sample_LCA23.mb.11cbin.1       | 90.60  | 0.692 | 68  |
| Sample_LCA23.Cluster2542       | 82.77  | 0.000 | 40  |
| Sample_LCA23.Cluster263        | 100.00 | 0.806 | 29  |
| Sample_LCA23.mb.33cbin.1       | 95.80  | 3.562 | 199 |
| Sample_LCA23.Cluster3080cbin.1 | 98.40  | 0.898 | 104 |
| Sample_LCA23.mb.28             | 91.87  | 2.215 | 138 |
| Sample_LCA23.mb.54             | 90.60  | 1.677 | 48  |
| Sample_LCA23.Cluster406        | 90.95  | 0.680 | 238 |
| Sample_LCA23.Cluster8070       | 99.32  | 1.006 | 20  |
| Sample_LCA23.mb.59             | 95.34  | 3.355 | 334 |
| Sample_LCA23.Cluster213cbin.1  | 90.43  | 0.199 | 285 |
| Sample_LCA23.Cluster5816cbin.1 | 98.65  | 0.755 | 24  |
| Sample_LCA23.mb.53             | 98.55  | 0.961 | 30  |
| Sample_LCA23.Cluster5538cbin.1 | 92.08  | 0.316 | 87  |
| Sample_LCA23.Cluster8409cbin.1 | 96.08  | 0.558 | 132 |
| Sample_LCA23.mb.67cbin.1       | 97.98  | 0.335 | 16  |
| Sample_LCA23.mb.68             | 97.19  | 4.166 | 183 |
| Sample_LCA23.Cluster3820cbin.1 | 91.27  | 3.188 | 162 |
| Sample_LCA23.Cluster4195cbin.1 | 82.00  | 3.225 | 621 |
| Sample_LCA23.mb.86             | 87.70  | 0.000 | 248 |
| Sample_LCA23.mb.4cbin.1        | 96.27  | 0.621 | 85  |
| Sample_LCA23.mb.70cbin.1       | 97.54  | 0.377 | 50  |
| Sample_LCA23.mb.30             | 98.55  | 0.966 | 113 |

|                                |        |       |     |
|--------------------------------|--------|-------|-----|
| Sample_LCA23.mb.84             | 97.66  | 3.450 | 46  |
| Sample_LCA23.mb.76cbin.1       | 88.32  | 2.721 | 238 |
| Sample_LCA23.Cluster6963cbin.1 | 91.82  | 0.512 | 329 |
| Sample_LCA23.mb.74cbin.1       | 94.69  | 2.153 | 249 |
| Sample_LCA23.mb.40cbin.1       | 99.06  | 1.282 | 93  |
| Sample_LCA23.mb.85cbin.1       | 99.45  | 1.146 | 195 |
| Sample_LCA24.mb.24             | 83.39  | 3.571 | 106 |
| Sample_LCA24.Cluster446cbin.1  | 90.93  | 0.000 | 292 |
| Sample_LCA24.mb.16             | 97.04  | 1.728 | 116 |
| Sample_LCA24.Cluster4405cbin.1 | 88.41  | 0.542 | 293 |
| Sample_LCA24.Cluster1988cbin.1 | 96.64  | 0.335 | 17  |
| Sample_LCA24.mb.42cbin.1       | 97.97  | 0.021 | 126 |
| Sample_LCA24.mb.25             | 94.19  | 1.298 | 137 |
| Sample_LCA24.mb.38cbin.1       | 88.51  | 1.166 | 115 |
| Sample_LCA24.Cluster4798       | 99.47  | 1.570 | 28  |
| Sample_LCA24.mb.40             | 99.07  | 1.612 | 18  |
| Sample_LCA24.Cluster11         | 98.13  | 0.745 | 110 |
| Sample_LCA24.mb.55             | 100.00 | 0.000 | 50  |
| Sample_LCA24.mb.9              | 94.73  | 2.880 | 132 |
| Sample_LCA24.mb.19             | 91.34  | 4.086 | 27  |
| Sample_LCA24.mb.20             | 90.48  | 1.019 | 159 |
| Sample_LCA24.Cluster1580cbin.1 | 81.45  | 0.681 | 50  |
| Sample_LCA24.mb.33cbin.1       | 99.27  | 0.236 | 73  |
| Sample_LCA24.mb.7              | 80.57  | 0.755 | 52  |
| Sample_LCA25.mb.50             | 98.65  | 0.000 | 15  |
| Sample_LCA25.mb.8              | 81.55  | 2.320 | 325 |
| Sample_LCA25.mb.20             | 88.59  | 0.671 | 18  |
| Sample_LCA25.Cluster2783       | 99.98  | 1.497 | 21  |
| Sample_LCA25.mb.15             | 96.87  | 1.057 | 160 |
| Sample_LCA25.mb.7              | 97.59  | 1.442 | 28  |
| Sample_LCA25.Cluster326cbin.1  | 80.24  | 1.360 | 88  |
| Sample_LCA25.mb.19cbin.1       | 82.65  | 1.698 | 429 |
| Sample_LCA25.mb.35cbin.1       | 99.21  | 0.476 | 121 |
| Sample_LCA25.Cluster1744cbin.1 | 87.81  | 0.000 | 60  |
| Sample_LCA25.Cluster3706cbin.1 | 97.87  | 0.370 | 109 |
| Sample_LCA25.Cluster6469       | 98.87  | 1.123 | 55  |
| Sample_LCA25.mb.6cbin.1        | 91.27  | 1.942 | 130 |
| Sample_LCA25.Cluster2442cbin.1 | 98.79  | 1.932 | 120 |
| Sample_LCA25.mb.18cbin.1       | 100.00 | 0.632 | 72  |
| Sample_LCA25.mb.26             | 99.03  | 0.845 | 78  |
| Sample_LCA25.Cluster1321cbin.1 | 83.34  | 2.775 | 674 |
| Sample_LCA25.Cluster192        | 98.70  | 0.418 | 99  |
| Sample_LCB09.Cluster10320      | 92.41  | 4.494 | 8   |
| Sample_LCB09.mb.33             | 99.19  | 1.075 | 75  |
| Sample_LCB09.Cluster9274cbin.1 | 87.97  | 1.476 | 332 |
| Sample_LCB09.mb.34             | 92.59  | 1.342 | 38  |
| Sample_LCB09.mb.22             | 82.86  | 2.348 | 121 |
| Sample_LCB09.mb.57             | 83.79  | 0.000 | 147 |
| Sample_LCB09.Cluster2908cbin.1 | 97.31  | 0.000 | 56  |
| Sample_LCB09.mb.19cbin.1       | 82.18  | 2.210 | 183 |
| Sample_LCB09.Cluster66cbin.1   | 87.79  | 0.226 | 74  |
| Sample_LCB09.mb.46cbin.1       | 92.22  | 4.629 | 292 |
| Sample_LCB09.Cluster1827       | 85.86  | 0.000 | 15  |
| Sample_LCB09.mb.58cbin.1       | 93.06  | 0.000 | 59  |
| Sample_LCB09.Cluster7974       | 99.32  | 0.854 | 18  |
| Sample_LCB09.mb.49cbin.1       | 95.56  | 3.481 | 182 |
| Sample_LCB09.Cluster9335       | 81.83  | 1.287 | 281 |
| Sample_LCB09.mb.78             | 89.11  | 0.000 | 54  |



|                                |       |       |     |
|--------------------------------|-------|-------|-----|
| Sample_LCB09.mb.65cbin.1       | 88.19 | 0.000 | 72  |
| Sample_LCB09.Cluster862cbin.1  | 89.54 | 0.795 | 18  |
| Sample_LCB09.mb.31cbin.1       | 95.63 | 1.360 | 276 |
| Sample_LCB09.mb.70             | 86.91 | 3.825 | 89  |
| Sample_LCB09.mb.42cbin.1       | 98.79 | 1.025 | 135 |
| Sample_LCB09.mb.69cbin.1       | 90.60 | 0.671 | 64  |
| Sample_LCB09.mb.18             | 97.76 | 2.013 | 72  |
| Sample_LCB09.mb.90             | 90.32 | 0.782 | 316 |
| Sample_LCB09.mb.2              | 86.64 | 2.046 | 262 |
| Sample_LCB09.mb.54             | 98.24 | 1.932 | 72  |
| Sample_LCB09.Cluster6670cbin.1 | 98.30 | 0.966 | 98  |
| Sample_LCB09.mb.6              | 96.59 | 0.680 | 222 |
| Sample_LCB09.Cluster345cbin.1  | 98.01 | 0.961 | 36  |
| Sample_LCB09.mb.67             | 96.58 | 1.743 | 90  |
| Sample_LCB09.mb.82cbin.1       | 96.97 | 0.000 | 13  |
| Sample_LCB09.Cluster3531       | 93.47 | 2.354 | 45  |
| Sample_LCB09.mb.73cbin.1       | 96.57 | 4.109 | 33  |
| Sample_LCB09.Cluster3297cbin.1 | 95.36 | 0.123 | 81  |
| Sample_LCB09.mb.50cbin.1       | 98.46 | 0.128 | 59  |
| Sample_LCB09.mb.51cbin.1       | 98.49 | 1.127 | 112 |
| Sample_LCB10.Cluster10459      | 92.41 | 4.494 | 7   |
| Sample_LCB10.mb.100            | 94.40 | 0.167 | 49  |
| Sample_LCB10.Cluster43cbin.1   | 80.18 | 4.089 | 292 |
| Sample_LCB10.mb.113            | 87.91 | 1.006 | 116 |
| Sample_LCB10.mb.30             | 98.38 | 0.000 | 46  |
| Sample_LCB10.mb.20             | 95.30 | 1.342 | 44  |
| Sample_LCB10.Cluster2571cbin.1 | 97.31 | 0.000 | 111 |
| Sample_LCB10.mb.104cbin.1      | 97.09 | 0.000 | 73  |
| Sample_LCB10.Cluster2169cbin.1 | 93.03 | 0.021 | 104 |
| Sample_LCB10.Cluster49         | 95.04 | 0.921 | 32  |
| Sample_LCB10.mb.71             | 93.71 | 1.677 | 100 |
| Sample_LCB10.mb.8              | 92.94 | 4.545 | 425 |
| Sample_LCB10.mb.58             | 88.54 | 1.304 | 203 |
| Sample_LCB10.Cluster7878       | 97.98 | 0.671 | 16  |
| Sample_LCB10.Cluster362        | 95.23 | 0.000 | 35  |
| Sample_LCB10.mb.120cbin.1      | 97.15 | 0.632 | 69  |
| Sample_LCB10.mb.106            | 95.23 | 0.680 | 216 |
| Sample_LCB10.Cluster2330cbin.1 | 97.27 | 0.000 | 18  |
| Sample_LCB10.Cluster10213      | 99.47 | 0.000 | 22  |
| Sample_LCB10.mb.11             | 97.31 | 0.335 | 12  |
| Sample_LCB10.mb.19cbin.1       | 91.72 | 2.380 | 174 |
| Sample_LCB10.Cluster1270cbin.1 | 94.77 | 0.454 | 28  |
| Sample_LCB10.mb.31cbin.1       | 92.62 | 2.415 | 273 |
| Sample_LCB10.mb.67             | 98.94 | 0.632 | 85  |
| Sample_LCB10.mb.63cbin.1       | 92.61 | 3.187 | 74  |
| Sample_LCB10.Cluster7401cbin.1 | 98.65 | 0.000 | 56  |
| Sample_LCB10.mb.89             | 99.19 | 1.075 | 74  |
| Sample_LCB10.mb.52             | 92.31 | 3.628 | 190 |
| Sample_LCB10.Cluster2199cbin.1 | 92.94 | 1.851 | 136 |
| Sample_LCB10.mb.40cbin.1       | 99.51 | 1.201 | 113 |
| Sample_LCB10.Cluster5231cbin.1 | 98.88 | 1.690 | 87  |
| Sample_LCB10.mb.82cbin.1       | 99.10 | 0.732 | 71  |
| Sample_LCB10.mb.44cbin.1       | 98.89 | 0.000 | 67  |
| Sample_LCB10.mb.116cbin.1      | 96.51 | 1.054 | 211 |
| Sample_LCB10.mb.81             | 91.57 | 2.380 | 129 |
| Sample_LCB10.Cluster3344       | 98.52 | 0.371 | 43  |
| Sample_LCB10.Cluster5766cbin.1 | 88.91 | 2.150 | 554 |
| Sample_LCB10.Cluster2061       | 97.69 | 0.128 | 59  |

|                                 |        |       |     |
|---------------------------------|--------|-------|-----|
| Sample_LCB10.mb.93              | 93.45  | 0.000 | 55  |
| Sample_LCB10.mb.97cbin.1        | 98.63  | 1.369 | 28  |
| Sample_LCB10.mb.99              | 99.27  | 0.961 | 27  |
| Sample_LCB10.mb.75              | 93.79  | 0.123 | 56  |
| Sample_LCB10.mb.61cbin.1        | 99.24  | 0.939 | 122 |
| Sample_LCB11.mb.22cbin.1        | 89.88  | 3.981 | 106 |
| Sample_LCB11.Cluster4735        | 92.93  | 1.342 | 22  |
| Sample_LCB11.mb.57cbin.1        | 99.05  | 2.507 | 230 |
| Sample_LCB11.Cluster68          | 84.73  | 2.348 | 128 |
| Sample_LCB11.mb.30              | 95.56  | 3.117 | 104 |
| Sample_LCB11.Cluster4219cbin.1  | 91.24  | 1.371 | 296 |
| Sample_LCB11.Cluster626cbin.1   | 86.57  | 2.460 | 100 |
| Sample_LCB11.mb.51              | 88.50  | 0.671 | 217 |
| Sample_LCB11.mb.34              | 80.20  | 2.684 | 40  |
| Sample_LCB11.mb.62              | 96.77  | 0.403 | 42  |
| Sample_LCB11.mb.36cbin.1        | 87.02  | 0.000 | 42  |
| Sample_LCB11.mb.55              | 99.26  | 0.000 | 26  |
| Sample_LCB11.mb.45              | 97.31  | 1.342 | 50  |
| Sample_LCB11.mb.47              | 97.98  | 0.671 | 119 |
| Sample_LCB11.Cluster9145cbin.1  | 98.65  | 0.671 | 19  |
| Sample_LCB11.Cluster802         | 100.00 | 0.000 | 25  |
| Sample_LCB11.Cluster1742        | 97.27  | 0.000 | 30  |
| Sample_LCB11.Cluster7542cbin.1  | 100.00 | 0.167 | 69  |
| Sample_LCB11.mb.52              | 90.60  | 3.691 | 46  |
| Sample_LCB11.mb.19cbin.1        | 94.63  | 1.342 | 57  |
| Sample_LCB11.mb.35cbin.1        | 99.32  | 1.738 | 26  |
| Sample_LCB11.Cluster7794cbin.1  | 87.84  | 3.801 | 422 |
| Sample_LCB11.mb.77cbin.1        | 81.01  | 4.530 | 214 |
| Sample_LCB11.mb.63              | 100.00 | 0.000 | 44  |
| Sample_LCB11.mb.17              | 86.91  | 1.486 | 217 |
| Sample_LCB11.Cluster6984cbin.1  | 94.35  | 1.025 | 412 |
| Sample_LCB11.Cluster5870cbin.1  | 98.71  | 2.307 | 72  |
| Sample_LCB11.mb.32              | 94.17  | 2.075 | 68  |
| Sample_LCB11.mb.29              | 98.66  | 0.064 | 84  |
| Sample_LCB12.Cluster2504cbin.1  | 97.76  | 0.000 | 32  |
| Sample_LCB12.Cluster6052cbin.1  | 86.29  | 0.000 | 21  |
| Sample_LCB12.mb.110             | 91.57  | 3.370 | 31  |
| Sample_LCB12.Cluster14970cbin.1 | 100.00 | 0.671 | 29  |
| Sample_LCB12.Cluster30          | 80.58  | 1.342 | 142 |
| Sample_LCB12.mb.1               | 98.38  | 0.000 | 40  |
| Sample_LCB12.mb.30              | 91.90  | 0.000 | 203 |
| Sample_LCB12.mb.42              | 91.29  | 1.685 | 18  |
| Sample_LCB12.mb.16              | 91.92  | 1.342 | 39  |
| Sample_LCB12.mb.113cbin.1       | 96.97  | 0.671 | 41  |
| Sample_LCB12.mb.116cbin.1       | 88.77  | 3.148 | 107 |
| Sample_LCB12.Cluster8572cbin.1  | 98.99  | 0.000 | 47  |
| Sample_LCB12.Cluster347cbin.1   | 97.59  | 0.370 | 58  |
| Sample_LCB12.mb.125cbin.1       | 90.93  | 1.789 | 48  |
| Sample_LCB12.Cluster6           | 91.91  | 0.591 | 215 |
| Sample_LCB12.mb.13cbin.1        | 89.43  | 0.433 | 59  |
| Sample_LCB12.Cluster3428cbin.1  | 88.05  | 4.026 | 31  |
| Sample_LCB12.Cluster725         | 95.91  | 0.000 | 101 |
| Sample_LCB12.Cluster10251cbin.1 | 98.24  | 2.898 | 48  |
| Sample_LCB12.Cluster11873cbin.1 | 98.98  | 1.970 | 105 |
| Sample_LCB12.mb.124             | 96.97  | 0.335 | 85  |
| Sample_LCB12.mb.105cbin.1       | 98.65  | 0.427 | 19  |
| Sample_LCB12.Cluster13525cbin.1 | 92.48  | 1.710 | 437 |
| Sample_LCB12.mb.91              | 87.69  | 1.342 | 85  |

|                                 |       |       |     |
|---------------------------------|-------|-------|-----|
| Sample_LCB12.mb.37              | 95.30 | 1.118 | 88  |
| Sample_LCB12.mb.101             | 94.80 | 2.403 | 233 |
| Sample_LCB12.mb.90              | 84.56 | 0.000 | 32  |
| Sample_LCB12.mb.45              | 87.98 | 1.442 | 97  |
| Sample_LCB12.mb.8               | 89.97 | 0.000 | 64  |
| Sample_LCB12.mb.55cbin.1        | 91.40 | 2.721 | 295 |
| Sample_LCB12.mb.54              | 99.32 | 0.671 | 67  |
| Sample_LCB12.mb.75              | 98.38 | 1.612 | 60  |
| Sample_LCB12.mb.77              | 88.25 | 0.000 | 9   |
| Sample_LCB12.mb.92              | 89.21 | 0.640 | 38  |
| Sample_LCB12.Cluster6103        | 86.44 | 1.858 | 85  |
| Sample_LCB12.mb.32              | 94.73 | 0.000 | 61  |
| Sample_LCB12.mb.93              | 80.54 | 2.013 | 248 |
| Sample_LCB12.mb.82              | 90.84 | 2.551 | 128 |
| Sample_LCB12.mb.80cbin.1        | 92.31 | 1.442 | 256 |
| Sample_LCB12.mb.7cbin.1         | 93.06 | 0.000 | 30  |
| Sample_LCB12.mb.94cbin.1        | 98.10 | 0.021 | 83  |
| Sample_LCB12.mb.95              | 85.30 | 1.565 | 224 |
| Sample_LCB12.mb.86cbin.1        | 99.03 | 3.846 | 20  |
| Sample_LCB12.mb.56cbin.1        | 99.03 | 4.287 | 106 |
| Sample_LCB12.mb.25              | 95.47 | 1.823 | 272 |
| Sample_LCB12.mb.74              | 94.54 | 0.128 | 297 |
| Sample_LCB12.mb.136cbin.1       | 96.24 | 1.440 | 281 |
| Sample_LCB12.mb.33cbin.1        | 91.84 | 1.111 | 308 |
| Sample_LCB13.Cluster4317cbin.1  | 96.77 | 1.075 | 44  |
| Sample_LCB13.Cluster6252cbin.1  | 93.93 | 1.342 | 27  |
| Sample_LCB13.mb.110             | 96.37 | 0.879 | 145 |
| Sample_LCB13.mb.12              | 90.38 | 1.363 | 191 |
| Sample_LCB13.Cluster228         | 86.99 | 1.342 | 42  |
| Sample_LCB13.Cluster308cbin.1   | 89.28 | 4.697 | 52  |
| Sample_LCB13.Cluster7562cbin.1  | 93.56 | 0.671 | 220 |
| Sample_LCB13.mb.18cbin.1        | 87.58 | 2.929 | 249 |
| Sample_LCB13.Cluster12208       | 94.36 | 0.335 | 31  |
| Sample_LCB13.Cluster567cbin.1   | 97.58 | 1.209 | 43  |
| Sample_LCB13.Cluster3631        | 94.63 | 0.671 | 9   |
| Sample_LCB13.Cluster11305cbin.1 | 96.37 | 1.006 | 21  |
| Sample_LCB13.mb.70              | 89.32 | 1.123 | 26  |
| Sample_LCB13.Cluster799cbin.1   | 91.22 | 2.782 | 85  |
| Sample_LCB13.mb.111cbin.1       | 90.77 | 1.172 | 280 |
| Sample_LCB13.Cluster219cbin.1   | 96.15 | 0.480 | 112 |
| Sample_LCB13.mb.112             | 98.40 | 0.000 | 63  |
| Sample_LCB13.mb.41              | 91.04 | 1.342 | 53  |
| Sample_LCB13.mb.105cbin.1       | 99.08 | 1.497 | 84  |
| Sample_LCB13.mb.46              | 83.62 | 3.309 | 327 |
| Sample_LCB13.Cluster10074cbin.1 | 83.77 | 2.830 | 561 |
| Sample_LCB13.mb.27              | 96.15 | 1.442 | 96  |
| Sample_LCB13.mb.68              | 87.91 | 0.671 | 30  |
| Sample_LCB13.mb.72              | 80.51 | 2.425 | 252 |
| Sample_LCB13.mb.71              | 94.78 | 0.671 | 88  |
| Sample_LCB13.mb.34cbin.1        | 95.73 | 0.591 | 135 |
| Sample_LCB13.mb.15              | 97.66 | 0.000 | 51  |
| Sample_LCB13.mb.31              | 99.03 | 0.221 | 43  |
| Sample_LCB13.mb.19              | 90.56 | 0.377 | 39  |
| Sample_LCB13.mb.83              | 85.23 | 2.135 | 44  |
| Sample_LCB13.Cluster7062        | 99.46 | 0.000 | 71  |
| Sample_LCB13.mb.98              | 94.93 | 1.582 | 112 |
| Sample_LCB13.mb.28              | 91.25 | 1.305 | 85  |
| Sample_LCB13.mb.69              | 88.82 | 1.267 | 203 |

|                                |       |       |     |
|--------------------------------|-------|-------|-----|
| Sample_LCB13.mb.80             | 94.29 | 1.525 | 55  |
| Sample_LCB13.mb.9cbin.1        | 98.63 | 0.000 | 46  |
| Sample_LCB13.mb.36cbin.1       | 98.51 | 1.635 | 39  |
| Sample_LCB13.mb.43             | 98.46 | 0.384 | 27  |
| Sample_LCB13.mb.60             | 98.23 | 0.961 | 140 |
| Sample_LCB13.Cluster5307cbin.1 | 98.40 | 1.029 | 193 |
| Sample_LCB13.Cluster5606cbin.1 | 98.31 | 1.384 | 192 |
| Sample_LCB14.mb.6              | 93.95 | 0.832 | 14  |
| Sample_LCB14.Cluster696        | 85.90 | 0.000 | 27  |
| Sample_LCB14.mb.43             | 97.98 | 0.000 | 57  |
| Sample_LCB14.Cluster2207       | 99.18 | 0.000 | 22  |
| Sample_LCB14.mb.45             | 93.17 | 1.363 | 296 |
| Sample_LCB14.Cluster11cbin.1   | 97.29 | 0.671 | 52  |
| Sample_LCB14.Cluster1090cbin.1 | 88.62 | 2.913 | 364 |
| Sample_LCB14.mb.4cbin.1        | 92.51 | 0.680 | 226 |
| Sample_LCB14.mb.63cbin.1       | 97.98 | 1.342 | 65  |
| Sample_LCB14.Cluster704cbin.1  | 98.08 | 0.000 | 61  |
| Sample_LCB14.mb.5              | 99.22 | 0.000 | 9   |
| Sample_LCB14.Cluster16cbin.1   | 90.64 | 4.256 | 144 |
| Sample_LCB14.Cluster238cbin.1  | 97.00 | 0.000 | 73  |
| Sample_LCB14.mb.46cbin.1       | 98.95 | 0.000 | 33  |
| Sample_LCB14.mb.55             | 82.16 | 0.000 | 583 |
| Sample_LCB14.mb.65             | 91.83 | 0.000 | 47  |
| Sample_LCB14.Cluster4494       | 96.47 | 0.704 | 25  |
| Sample_LCB14.mb.52cbin.1       | 96.51 | 1.140 | 363 |
| Sample_LCB14.Cluster247        | 99.27 | 0.480 | 23  |
| Sample_LCB14.mb.36             | 84.35 | 1.858 | 103 |
| Sample_LCB14.mb.21cbin.1       | 95.32 | 0.584 | 64  |
| Sample_LCB14.Cluster1916cbin.1 | 91.79 | 0.000 | 77  |
| Sample_LCB14.Cluster1757       | 98.18 | 0.185 | 26  |
| Sample_LCB14.mb.3              | 88.10 | 0.000 | 20  |
| Sample_LCB14.Cluster2653cbin.1 | 83.81 | 1.488 | 128 |
| Sample_LCB14.Cluster2742cbin.1 | 99.03 | 0.320 | 149 |
| Sample_LCB14.mb.50             | 90.84 | 0.000 | 25  |
| Sample_LCB14.mb.25cbin.1       | 94.15 | 0.526 | 156 |
| Sample_LCB14.mb.37             | 96.93 | 4.727 | 313 |
| Sample_LCB15.mb.1              | 94.62 | 0.000 | 56  |
| Sample_LCB15.mb.32             | 87.69 | 3.330 | 493 |
| Sample_LCB15.mb.3cbin.1        | 91.63 | 1.442 | 24  |
| Sample_LCB15.mb.28             | 92.39 | 4.006 | 287 |
| Sample_LCB15.mb.48cbin.1       | 96.15 | 3.628 | 332 |
| Sample_LCB15.mb.50cbin.1       | 96.64 | 2.369 | 129 |
| Sample_LCB15.mb.24cbin.1       | 81.59 | 4.101 | 103 |
| Sample_LCB15.mb.20cbin.1       | 97.82 | 1.060 | 142 |
| Sample_LCB15.mb.23cbin.1       | 86.33 | 1.476 | 261 |
| Sample_LCB15.mb.18cbin.1       | 92.39 | 1.342 | 215 |
| Sample_LCB15.mb.43             | 85.02 | 0.000 | 44  |
| Sample_LCB15.Cluster42cbin.1   | 90.64 | 0.850 | 110 |
| Sample_LCB15.mb.33             | 91.57 | 3.988 | 305 |
| Sample_LCB15.Cluster1020       | 93.03 | 0.495 | 74  |
| Sample_LCB15.mb.31             | 92.49 | 3.345 | 204 |
| Sample_LCB15.mb.49cbin.1       | 95.22 | 2.327 | 233 |
| Sample_LCB15.mb.17cbin.1       | 89.64 | 0.409 | 44  |
| Sample_LCB15.mb.34cbin.1       | 88.08 | 0.673 | 48  |
| Sample_LCB16.mb.50cbin.1       | 85.24 | 1.075 | 253 |
| Sample_LCB16.mb.28             | 83.30 | 1.265 | 259 |
| Sample_LCB16.mb.41cbin.1       | 85.80 | 0.000 | 352 |
| Sample_LCB16.Cluster692cbin.1  | 94.39 | 0.961 | 30  |

|                                 |        |       |     |
|---------------------------------|--------|-------|-----|
| Sample_LCB16.Cluster819         | 93.23  | 0.898 | 60  |
| Sample_LCB16.Cluster2885        | 98.65  | 0.671 | 16  |
| Sample_LCB16.mb.54              | 91.83  | 0.850 | 56  |
| Sample_LCB16.Cluster43          | 89.82  | 0.460 | 234 |
| Sample_LCB16.mb.57              | 83.30  | 0.316 | 326 |
| Sample_LCB16.mb.66cbin.1        | 98.41  | 1.020 | 238 |
| Sample_LCB16.mb.14              | 92.93  | 2.499 | 66  |
| Sample_LCB16.Cluster4450cbin.1  | 98.65  | 0.671 | 26  |
| Sample_LCB16.Cluster4274cbin.1  | 99.03  | 1.207 | 71  |
| Sample_LCB16.mb.64cbin.1        | 96.53  | 4.931 | 106 |
| Sample_LCB16.mb.5cbin.1         | 86.63  | 1.889 | 381 |
| Sample_LCB16.mb.26cbin.1        | 91.94  | 0.673 | 44  |
| Sample_LCB17.Cluster2017        | 80.35  | 0.097 | 251 |
| Sample_LCB17.Cluster12880cbin.1 | 98.65  | 0.000 | 12  |
| Sample_LCB17.Cluster11076cbin.1 | 97.31  | 2.181 | 309 |
| Sample_LCB17.mb.100             | 98.92  | 0.000 | 44  |
| Sample_LCB17.Cluster58          | 83.17  | 0.469 | 169 |
| Sample_LCB17.Cluster228         | 80.53  | 0.000 | 37  |
| Sample_LCB17.Cluster2810        | 91.27  | 0.000 | 22  |
| Sample_LCB17.Cluster5688        | 89.42  | 0.000 | 49  |
| Sample_LCB17.mb.10cbin.1        | 100.00 | 0.335 | 22  |
| Sample_LCB17.Cluster10309cbin.1 | 92.61  | 0.000 | 17  |
| Sample_LCB17.Cluster3559cbin.1  | 92.42  | 0.632 | 81  |
| Sample_LCB17.Cluster3277cbin.1  | 99.03  | 0.961 | 31  |
| Sample_LCB17.Cluster245cbin.1   | 97.40  | 0.555 | 50  |
| Sample_LCB17.mb.11              | 80.53  | 0.671 | 53  |
| Sample_LCB17.Cluster13887cbin.1 | 92.60  | 2.508 | 455 |
| Sample_LCB17.mb.4               | 92.41  | 1.123 | 16  |
| Sample_LCB17.Cluster4           | 97.02  | 1.267 | 230 |
| Sample_LCB17.mb.23              | 94.29  | 0.671 | 86  |
| Sample_LCB17.mb.27              | 81.87  | 2.013 | 39  |
| Sample_LCB17.Cluster5194cbin.1  | 88.70  | 1.932 | 257 |
| Sample_LCB17.Cluster14164cbin.1 | 86.07  | 0.632 | 61  |
| Sample_LCB17.Cluster4975        | 96.28  | 1.689 | 85  |
| Sample_LCB17.mb.128             | 85.23  | 0.000 | 59  |
| Sample_LCB17.Cluster8299        | 90.33  | 1.449 | 75  |
| Sample_LCB17.mb.127             | 93.75  | 0.480 | 49  |
| Sample_LCB17.mb.126             | 89.35  | 3.596 | 134 |
| Sample_LCB17.mb.26              | 100.00 | 0.961 | 25  |
| Sample_LCB17.mb.131cbin.1       | 99.54  | 0.075 | 28  |
| Sample_LCB17.Cluster686cbin.1   | 97.92  | 0.345 | 242 |
| Sample_LCB17.mb.67              | 85.24  | 2.828 | 187 |
| Sample_LCB17.mb.108             | 90.23  | 0.000 | 37  |
| Sample_LCB17.Cluster12249cbin.1 | 98.38  | 1.612 | 123 |
| Sample_LCB17.mb.65              | 93.95  | 0.000 | 83  |
| Sample_LCB17.mb.106             | 97.54  | 0.000 | 77  |
| Sample_LCB17.mb.24cbin.1        | 87.35  | 0.000 | 37  |
| Sample_LCB17.mb.94cbin.1        | 97.90  | 1.296 | 130 |
| Sample_LCB17.mb.83cbin.1        | 88.24  | 2.118 | 137 |
| Sample_LCB17.mb.59cbin.1        | 99.51  | 3.381 | 74  |
| Sample_LCB17.Cluster5491cbin.1  | 97.15  | 1.153 | 164 |
| Sample_LCB17.mb.21              | 89.81  | 1.865 | 51  |
| Sample_LCB17.mb.88              | 95.69  | 2.580 | 195 |
| Sample_LCB17.mb.71              | 97.27  | 1.342 | 26  |
| Sample_LCB17.mb.73              | 97.78  | 1.360 | 250 |
| Sample_LCB17.mb.80cbin.1        | 91.61  | 0.671 | 123 |
| Sample_LCB17.mb.86cbin.1        | 92.48  | 1.006 | 45  |
| Sample_LCB17.mb.84              | 97.98  | 0.503 | 40  |

|                                |       |       |     |
|--------------------------------|-------|-------|-----|
| Sample_LCB17.mb.98             | 96.97 | 0.671 | 21  |
| Sample_LCB17.mb.118cbin.1      | 92.56 | 3.290 | 586 |
| Sample_LCB17.mb.81cbin.1       | 92.74 | 0.746 | 99  |
| Sample_LCB17.mb.62             | 97.20 | 1.185 | 374 |
| Sample_LCB19.mb.11cbin.1       | 95.69 | 0.000 | 50  |
| Sample_LCB19.Cluster50cbin.1   | 89.93 | 0.061 | 17  |
| Sample_LCB19.mb.17cbin.1       | 86.77 | 2.013 | 273 |
| Sample_LCB19.Cluster1720       | 97.04 | 0.632 | 38  |
| Sample_LCB19.mb.91             | 81.76 | 1.237 | 78  |
| Sample_LCB19.Cluster2356       | 99.40 | 0.967 | 18  |
| Sample_LCB19.Cluster833        | 94.96 | 0.000 | 5   |
| Sample_LCB19.mb.47cbin.1       | 91.03 | 0.210 | 71  |
| Sample_LCB19.Cluster1786       | 92.49 | 1.497 | 40  |
| Sample_LCB19.Cluster23cbin.1   | 86.79 | 3.766 | 337 |
| Sample_LCB19.Cluster270cbin.1  | 94.11 | 1.250 | 189 |
| Sample_LCB19.Cluster4285cbin.1 | 99.32 | 0.671 | 20  |
| Sample_LCB19.mb.44cbin.1       | 93.58 | 0.671 | 215 |
| Sample_LCB19.mb.49             | 83.75 | 0.181 | 36  |
| Sample_LCB19.Cluster3608       | 96.57 | 0.000 | 27  |
| Sample_LCB19.mb.65             | 81.03 | 0.680 | 76  |
| Sample_LCB19.mb.58             | 94.59 | 3.639 | 228 |
| Sample_LCB19.Cluster2409cbin.1 | 88.07 | 1.006 | 333 |
| Sample_LCB19.mb.34             | 99.21 | 1.357 | 48  |
| Sample_LCB19.mb.87             | 94.55 | 0.680 | 206 |
| Sample_LCB19.mb.38             | 93.54 | 0.806 | 51  |
| Sample_LCB19.mb.67             | 91.13 | 0.969 | 84  |
| Sample_LCB19.mb.75cbin.1       | 97.31 | 0.000 | 30  |
| Sample_LCB19.Cluster4209cbin.1 | 98.42 | 2.898 | 77  |
| Sample_LCB19.Cluster3027cbin.1 | 92.45 | 0.557 | 82  |
| Sample_LCB19.mb.41             | 91.72 | 2.241 | 228 |
| Sample_LCB19.mb.1              | 86.10 | 2.407 | 150 |
| Sample_LCB19.mb.61cbin.1       | 97.10 | 4.347 | 95  |
| Sample_LCB19.Cluster959cbin.1  | 96.18 | 0.384 | 148 |
| Sample_LCB19.mb.5              | 89.24 | 0.700 | 48  |
| Sample_LCB20.Cluster10120      | 91.57 | 2.247 | 13  |
| Sample_LCB20.Cluster9862       | 91.57 | 1.123 | 11  |
| Sample_LCB20.mb.6              | 92.69 | 2.247 | 18  |
| Sample_LCB20.mb.46             | 83.02 | 1.230 | 363 |
| Sample_LCB20.Cluster531cbin.1  | 90.50 | 0.671 | 101 |
| Sample_LCB20.mb.31cbin.1       | 80.53 | 0.209 | 36  |
| Sample_LCB20.mb.55cbin.1       | 98.60 | 2.192 | 124 |
| Sample_LCB20.mb.32             | 93.67 | 0.671 | 180 |
| Sample_LCB20.mb.17             | 91.14 | 4.450 | 178 |
| Sample_LCB20.Cluster3757cbin.1 | 89.55 | 2.365 | 293 |
| Sample_LCB20.mb.52cbin.1       | 85.01 | 0.000 | 40  |
| Sample_LCB20.mb.37             | 80.70 | 1.067 | 271 |
| Sample_LCB20.mb.78             | 85.90 | 3.041 | 138 |
| Sample_LCB20.Cluster7747       | 97.09 | 0.671 | 21  |
| Sample_LCB20.mb.10cbin.1       | 97.98 | 0.335 | 16  |
| Sample_LCB20.Cluster552cbin.1  | 97.93 | 1.013 | 52  |
| Sample_LCB20.mb.64             | 84.22 | 1.812 | 394 |
| Sample_LCB20.mb.20             | 91.73 | 1.121 | 106 |
| Sample_LCB20.Cluster3414       | 96.60 | 1.006 | 18  |
| Sample_LCB20.mb.16             | 97.38 | 0.671 | 105 |
| Sample_LCB20.mb.68cbin.1       | 89.93 | 1.677 | 32  |
| Sample_LCB20.mb.79cbin.1       | 95.97 | 0.000 | 21  |
| Sample_LCB20.mb.19             | 91.05 | 0.523 | 28  |
| Sample_LCB20.mb.65             | 99.51 | 0.961 | 27  |

|                                 |        |       |     |
|---------------------------------|--------|-------|-----|
| Sample_LCB20.mb.54cbin.1        | 94.11  | 2.564 | 83  |
| Sample_LCB20.Cluster5370cbin.1  | 99.62  | 0.000 | 20  |
| Sample_LCB20.Cluster5551cbin.1  | 98.38  | 0.000 | 98  |
| Sample_LCB20.Cluster6220cbin.1  | 91.09  | 0.769 | 497 |
| Sample_LCB20.mb.30              | 98.52  | 0.384 | 70  |
| Sample_LCB20.mb.23cbin.1        | 97.35  | 3.018 | 194 |
| Sample_LCB20.mb.83              | 93.65  | 4.197 | 209 |
| Sample_LCB20.Cluster2174        | 95.80  | 0.106 | 48  |
| Sample_LCB20.mb.3               | 93.65  | 0.109 | 47  |
| Sample_LCB21.Cluster12270cbin.1 | 90.66  | 1.333 | 150 |
| Sample_LCB21.Cluster33cbin.1    | 83.60  | 3.205 | 308 |
| Sample_LCB21.mb.108             | 93.93  | 2.013 | 34  |
| Sample_LCB21.Cluster348         | 83.28  | 0.671 | 48  |
| Sample_LCB21.Cluster3886cbin.1  | 86.20  | 0.733 | 178 |
| Sample_LCB21.mb.18cbin.1        | 81.22  | 0.185 | 55  |
| Sample_LCB21.Cluster3188cbin.1  | 95.97  | 1.342 | 16  |
| Sample_LCB21.Cluster771cbin.1   | 91.94  | 3.020 | 142 |
| Sample_LCB21.mb.95cbin.1        | 96.77  | 1.075 | 72  |
| Sample_LCB21.Cluster9179        | 99.32  | 0.671 | 17  |
| Sample_LCB21.Cluster6899cbin.1  | 89.13  | 1.845 | 215 |
| Sample_LCB21.mb.56cbin.1        | 92.41  | 2.684 | 179 |
| Sample_LCB21.Cluster7124cbin.1  | 99.05  | 0.949 | 166 |
| Sample_LCB21.mb.76              | 86.92  | 0.707 | 91  |
| Sample_LCB21.mb.98cbin.1        | 95.56  | 2.013 | 55  |
| Sample_LCB21.mb.77              | 98.55  | 2.673 | 51  |
| Sample_LCB21.mb.50cbin.1        | 96.93  | 0.335 | 29  |
| Sample_LCB21.mb.70              | 93.14  | 2.531 | 73  |
| Sample_LCB21.Cluster4525cbin.1  | 96.83  | 0.105 | 79  |
| Sample_LCB21.mb.102cbin.1       | 98.79  | 1.442 | 36  |
| Sample_LCB21.mb.36cbin.1        | 90.93  | 2.046 | 213 |
| Sample_LCB21.Cluster8836cbin.1  | 97.58  | 2.415 | 263 |
| Sample_LCB21.Cluster84cbin.1    | 91.94  | 2.315 | 180 |
| Sample_LCB21.mb.9cbin.1         | 95.78  | 1.497 | 84  |
| Sample_LCB21.mb.91              | 97.09  | 0.000 | 30  |
| Sample_LCB21.mb.96              | 100.00 | 1.380 | 139 |
| Sample_LCB21.mb.53cbin.1        | 92.81  | 4.232 | 236 |
| Sample_LCB21.Cluster7184cbin.1  | 97.09  | 0.961 | 140 |
| Sample_LCB21.mb.68              | 88.93  | 2.230 | 183 |
| Sample_LCB21.mb.87              | 91.37  | 3.557 | 173 |
| Sample_LCB21.mb.66              | 94.70  | 1.347 | 206 |
| Sample_LCB21.Cluster4135cbin.1  | 99.81  | 0.477 | 94  |
| Sample_LCB22.Cluster2302cbin.1  | 96.77  | 2.121 | 39  |
| Sample_LCB22.mb.44              | 80.95  | 3.327 | 127 |
| Sample_LCB22.Cluster11885       | 84.61  | 0.000 | 21  |
| Sample_LCB22.mb.4cbin.1         | 93.93  | 2.684 | 37  |
| Sample_LCB22.Cluster494cbin.1   | 98.43  | 1.006 | 160 |
| Sample_LCB22.mb.92              | 91.29  | 1.123 | 60  |
| Sample_LCB22.Cluster190cbin.1   | 92.47  | 0.806 | 155 |
| Sample_LCB22.mb.15              | 94.12  | 0.671 | 110 |
| Sample_LCB22.mb.7               | 99.30  | 1.165 | 100 |
| Sample_LCB22.Cluster4801cbin.1  | 89.85  | 1.449 | 64  |
| Sample_LCB22.Cluster3595        | 99.40  | 0.898 | 41  |
| Sample_LCB22.mb.50cbin.1        | 97.98  | 0.671 | 44  |
| Sample_LCB22.Cluster6899        | 95.97  | 0.000 | 10  |
| Sample_LCB22.mb.16              | 93.95  | 1.006 | 85  |
| Sample_LCB22.Cluster127         | 97.95  | 0.000 | 28  |
| Sample_LCB22.mb.31              | 85.38  | 1.077 | 236 |
| Sample_LCB22.Cluster9445        | 97.98  | 0.335 | 29  |

|                                 |       |       |     |
|---------------------------------|-------|-------|-----|
| Sample_LCB22.mb.10              | 98.65 | 0.000 | 20  |
| Sample_LCB22.mb.64cbin.1        | 94.95 | 1.805 | 90  |
| Sample_LCB22.Cluster10629cbin.1 | 95.61 | 3.304 | 363 |
| Sample_LCB22.Cluster7041cbin.1  | 91.30 | 1.560 | 82  |
| Sample_LCB22.mb.24              | 93.28 | 0.000 | 21  |
| Sample_LCB22.Cluster5886        | 95.49 | 0.784 | 76  |
| Sample_LCB22.mb.74              | 97.37 | 1.250 | 86  |
| Sample_LCB22.mb.58              | 85.50 | 1.449 | 84  |
| Sample_LCB22.mb.71cbin.1        | 92.56 | 3.490 | 153 |
| Sample_LCB22.Cluster2133cbin.1  | 84.53 | 3.522 | 175 |
| Sample_LCB22.Cluster4267        | 99.23 | 0.512 | 74  |
| Sample_LCB22.mb.63cbin.1        | 94.02 | 0.836 | 184 |
| Sample_LCB22.mb.13cbin.1        | 97.15 | 2.371 | 215 |
| Sample_LCB22.mb.91cbin.1        | 96.68 | 0.537 | 153 |
| Sample_LCB22.mb.46cbin.1        | 99.29 | 0.079 | 57  |
| Sample_LCB23.Cluster8702        | 97.98 | 1.677 | 14  |
| Sample_LCB23.Cluster351cbin.1   | 94.63 | 0.020 | 39  |
| Sample_LCB23.Cluster597cbin.1   | 94.36 | 2.348 | 113 |
| Sample_LCB23.Cluster4176cbin.1  | 94.01 | 1.497 | 111 |
| Sample_LCB23.Cluster153         | 98.92 | 3.225 | 27  |
| Sample_LCB23.Cluster1202cbin.1  | 91.56 | 0.223 | 151 |
| Sample_LCB23.mb.15cbin.1        | 90.00 | 0.000 | 53  |
| Sample_LCB23.Cluster750cbin.1   | 98.55 | 1.923 | 50  |
| Sample_LCB23.Cluster5199        | 84.56 | 0.000 | 21  |
| Sample_LCB23.Cluster540         | 97.27 | 0.000 | 83  |
| Sample_LCB23.Cluster10099cbin.1 | 85.47 | 2.034 | 280 |
| Sample_LCB23.Cluster7723        | 99.32 | 4.362 | 22  |
| Sample_LCB23.Cluster10438       | 91.50 | 0.000 | 121 |
| Sample_LCB23.mb.5cbin.1         | 96.41 | 0.126 | 113 |
| Sample_LCB23.Cluster37          | 96.27 | 0.621 | 81  |
| Sample_LCB23.mb.87cbin.1        | 86.66 | 1.363 | 372 |
| Sample_LCB23.mb.35              | 91.49 | 0.000 | 96  |
| Sample_LCB23.Cluster527         | 97.20 | 0.718 | 74  |
| Sample_LCB23.Cluster6112cbin.1  | 94.90 | 0.377 | 49  |
| Sample_LCB23.Cluster647cbin.1   | 98.46 | 0.377 | 61  |
| Sample_LCB23.mb.72              | 94.92 | 1.518 | 36  |
| Sample_LCB23.mb.67cbin.1        | 91.13 | 1.898 | 77  |
| Sample_LCB23.mb.73cbin.1        | 96.45 | 2.173 | 127 |
| Sample_LCB23.mb.90cbin.1        | 96.37 | 0.584 | 76  |
| Sample_LCB23.Cluster2610        | 99.06 | 0.897 | 72  |
| Sample_LCB23.Cluster3712cbin.1  | 96.49 | 2.114 | 230 |
| Sample_LCB23.mb.20cbin.1        | 99.37 | 1.218 | 185 |
| Sample_LCB24.Cluster810         | 81.20 | 0.000 | 144 |
| Sample_LCB24.Cluster528cbin.1   | 87.66 | 0.000 | 111 |
| Sample_LCB24.mb.60cbin.1        | 88.04 | 0.671 | 122 |
| Sample_LCB24.Cluster1115cbin.1  | 87.97 | 0.021 | 67  |
| Sample_LCB24.Cluster162cbin.1   | 96.37 | 1.587 | 227 |
| Sample_LCB24.Cluster253cbin.1   | 90.28 | 0.806 | 48  |
| Sample_LCB24.Cluster3220cbin.1  | 97.98 | 0.671 | 15  |
| Sample_LCB24.mb.56              | 98.38 | 1.612 | 92  |
| Sample_LCB24.Cluster7479        | 99.47 | 0.000 | 30  |
| Sample_LCB24.Cluster52          | 98.13 | 0.776 | 72  |
| Sample_LCB24.Cluster4368cbin.1  | 99.27 | 0.966 | 64  |
| Sample_LCB24.mb.61              | 98.63 | 0.546 | 47  |
| Sample_LCB24.mb.70cbin.1        | 99.07 | 0.576 | 51  |
| Sample_LCB24.Cluster4504cbin.1  | 81.67 | 3.812 | 578 |
| Sample_LCB24.Cluster5212cbin.1  | 95.84 | 3.144 | 152 |
| Sample_LCB24.mb.77              | 94.57 | 2.067 | 85  |



|                                 |        |       |     |
|---------------------------------|--------|-------|-----|
| Sample_LCB24.mb.81cbin.1        | 98.80  | 0.000 | 44  |
| Sample_LCB24.mb.50              | 93.82  | 1.461 | 185 |
| Sample_LCB24.mb.7               | 95.10  | 2.818 | 97  |
| Sample_LCB24.mb.71cbin.1        | 98.26  | 2.884 | 220 |
| Sample_LCB24.mb.17cbin.1        | 97.72  | 1.347 | 397 |
| Sample_LCB25.mb.71cbin.1        | 86.60  | 0.632 | 331 |
| Sample_LCB25.Cluster768cbin.1   | 90.72  | 1.133 | 363 |
| Sample_LCB25.Cluster4305cbin.1  | 89.51  | 0.838 | 269 |
| Sample_LCB25.mb.21cbin.1        | 90.17  | 0.000 | 119 |
| Sample_LCB25.Cluster468         | 94.83  | 0.961 | 36  |
| Sample_LCB25.Cluster2594        | 99.98  | 1.497 | 22  |
| Sample_LCB25.Cluster6031cbin.1  | 95.07  | 0.000 | 336 |
| Sample_LCB25.Cluster2cbin.1     | 80.34  | 3.537 | 184 |
| Sample_LCB25.mb.17              | 94.25  | 1.250 | 214 |
| Sample_LCB25.mb.59              | 96.59  | 1.020 | 72  |
| Sample_LCB25.mb.25              | 95.30  | 0.000 | 41  |
| Sample_LCB25.mb.72              | 85.23  | 0.671 | 18  |
| Sample_LCB25.Cluster14          | 99.76  | 0.000 | 20  |
| Sample_LCB25.mb.65              | 96.04  | 0.000 | 38  |
| Sample_LCB25.mb.70cbin.1        | 91.75  | 2.111 | 158 |
| Sample_LCB25.mb.20cbin.1        | 87.69  | 3.762 | 77  |
| Sample_LCB25.mb.22              | 80.28  | 2.898 | 104 |
| Sample_LCB25.Cluster6084        | 98.87  | 1.123 | 58  |
| Sample_LCB25.mb.45              | 95.28  | 0.566 | 117 |
| Sample_LCB25.mb.58cbin.1        | 99.51  | 1.368 | 157 |
| Sample_LCB25.mb.2cbin.1         | 100.00 | 0.632 | 68  |
| Sample_LCB25.mb.10              | 96.52  | 0.362 | 74  |
| Sample_LCB25.Cluster4572cbin.1  | 98.92  | 0.000 | 100 |
| Sample_LCB25.Cluster1584cbin.1  | 97.05  | 3.793 | 227 |
| Sample_LCB25.Cluster779cbin.1   | 99.44  | 0.381 | 111 |
| Sample_LCC09.Cluster2953cbin.1  | 97.17  | 0.000 | 14  |
| Sample_LCC09.Cluster1771cbin.1  | 95.84  | 1.612 | 150 |
| Sample_LCC09.Cluster10253cbin.1 | 92.43  | 1.342 | 260 |
| Sample_LCC09.mb.103cbin.1       | 97.42  | 0.335 | 51  |
| Sample_LCC09.Cluster1325cbin.1  | 94.46  | 2.013 | 116 |
| Sample_LCC09.Cluster32cbin.1    | 97.36  | 2.684 | 183 |
| Sample_LCC09.mb.108cbin.1       | 94.40  | 0.000 | 71  |
| Sample_LCC09.Cluster1576cbin.1  | 95.54  | 0.680 | 211 |
| Sample_LCC09.Cluster1143cbin.1  | 91.92  | 3.401 | 190 |
| Sample_LCC09.mb.110cbin.1       | 97.04  | 2.848 | 75  |
| Sample_LCC09.mb.125             | 92.91  | 3.164 | 149 |
| Sample_LCC09.Cluster11861       | 99.47  | 0.000 | 25  |
| Sample_LCC09.Cluster2611        | 96.13  | 0.552 | 65  |
| Sample_LCC09.mb.106cbin.1       | 94.63  | 0.000 | 15  |
| Sample_LCC09.Cluster7300cbin.1  | 97.17  | 4.926 | 290 |
| Sample_LCC09.Cluster9141        | 99.32  | 2.684 | 19  |
| Sample_LCC09.mb.29cbin.1        | 87.24  | 0.000 | 71  |
| Sample_LCC09.mb.59              | 93.93  | 1.342 | 34  |
| Sample_LCC09.Cluster8951cbin.1  | 94.33  | 0.713 | 302 |
| Sample_LCC09.mb.18              | 90.26  | 2.348 | 209 |
| Sample_LCC09.mb.46cbin.1        | 90.60  | 1.764 | 52  |
| Sample_LCC09.mb.128             | 95.71  | 3.623 | 45  |
| Sample_LCC09.mb.137cbin.1       | 93.18  | 2.954 | 33  |
| Sample_LCC09.Cluster898         | 95.43  | 2.003 | 31  |
| Sample_LCC09.mb.49cbin.1        | 90.60  | 1.006 | 51  |
| Sample_LCC09.mb.1cbin.1         | 96.57  | 0.000 | 29  |
| Sample_LCC09.mb.41cbin.1        | 89.11  | 0.000 | 80  |
| Sample_LCC09.Cluster5114cbin.1  | 89.61  | 2.366 | 40  |

|                                |       |       |     |
|--------------------------------|-------|-------|-----|
| Sample_LCC09.mb.96             | 94.02 | 1.342 | 199 |
| Sample_LCC09.mb.79             | 85.51 | 3.322 | 380 |
| Sample_LCC09.Cluster2591cbin.1 | 97.34 | 0.000 | 54  |
| Sample_LCC09.mb.93             | 99.32 | 0.671 | 89  |
| Sample_LCC09.mb.6              | 90.61 | 4.191 | 203 |
| Sample_LCC09.mb.45             | 91.10 | 1.000 | 76  |
| Sample_LCC09.mb.27cbin.1       | 98.73 | 1.371 | 129 |
| Sample_LCC09.Cluster6301cbin.1 | 99.46 | 0.000 | 68  |
| Sample_LCC09.mb.60cbin.1       | 94.00 | 1.382 | 29  |
| Sample_LCC09.mb.20             | 80.19 | 0.123 | 62  |
| Sample_LCC09.mb.56cbin.1       | 97.98 | 2.013 | 55  |
| Sample_LCC09.mb.104            | 94.13 | 1.486 | 69  |
| Sample_LCC09.mb.61cbin.1       | 96.49 | 0.292 | 77  |
| Sample_LCC09.mb.64cbin.1       | 99.03 | 3.852 | 108 |
| Sample_LCC09.mb.77             | 94.63 | 0.610 | 99  |
| Sample_LCC10.Cluster8948       | 92.41 | 4.494 | 7   |
| Sample_LCC10.mb.16             | 93.06 | 0.671 | 138 |
| Sample_LCC10.Cluster705cbin.1  | 85.94 | 2.818 | 331 |
| Sample_LCC10.Cluster634cbin.1  | 86.35 | 0.000 | 69  |
| Sample_LCC10.mb.70             | 98.38 | 0.000 | 45  |
| Sample_LCC10.mb.101cbin.1      | 95.74 | 3.489 | 82  |
| Sample_LCC10.Cluster2822cbin.1 | 85.51 | 1.275 | 280 |
| Sample_LCC10.mb.75             | 93.93 | 1.342 | 37  |
| Sample_LCC10.mb.60cbin.1       | 91.94 | 3.020 | 236 |
| Sample_LCC10.mb.46             | 93.28 | 0.167 | 66  |
| Sample_LCC10.Cluster99         | 84.23 | 3.009 | 177 |
| Sample_LCC10.Cluster1836cbin.1 | 89.24 | 0.065 | 74  |
| Sample_LCC10.Cluster742        | 82.40 | 3.636 | 27  |
| Sample_LCC10.mb.65cbin.1       | 88.79 | 1.687 | 273 |
| Sample_LCC10.mb.102            | 93.21 | 2.040 | 155 |
| Sample_LCC10.Cluster6772cbin.1 | 99.32 | 0.671 | 23  |
| Sample_LCC10.Cluster620cbin.1  | 95.19 | 0.961 | 73  |
| Sample_LCC10.mb.14cbin.1       | 87.43 | 1.690 | 37  |
| Sample_LCC10.mb.47             | 87.18 | 0.680 | 348 |
| Sample_LCC10.Cluster272        | 95.23 | 0.000 | 38  |
| Sample_LCC10.mb.93             | 93.70 | 0.932 | 83  |
| Sample_LCC10.Cluster8756cbin.1 | 99.47 | 0.000 | 24  |
| Sample_LCC10.Cluster1767cbin.1 | 94.23 | 0.000 | 123 |
| Sample_LCC10.Cluster6632cbin.1 | 89.48 | 2.263 | 381 |
| Sample_LCC10.mb.63cbin.1       | 97.27 | 4.362 | 49  |
| Sample_LCC10.mb.29             | 94.47 | 0.988 | 19  |
| Sample_LCC10.mb.82cbin.1       | 97.31 | 0.000 | 12  |
| Sample_LCC10.mb.84cbin.1       | 99.01 | 1.086 | 108 |
| Sample_LCC10.Cluster5474cbin.1 | 96.72 | 2.957 | 44  |
| Sample_LCC10.mb.89cbin.1       | 96.57 | 0.000 | 42  |
| Sample_LCC10.Cluster3676cbin.1 | 96.08 | 0.123 | 72  |
| Sample_LCC10.mb.83             | 99.36 | 0.105 | 125 |
| Sample_LCC10.Cluster7124cbin.1 | 98.35 | 0.563 | 120 |
| Sample_LCC10.mb.50cbin.1       | 96.50 | 0.000 | 234 |
| Sample_LCC10.mb.38cbin.1       | 88.47 | 3.009 | 616 |
| Sample_LCC10.mb.95             | 88.07 | 0.000 | 54  |
| Sample_LCC10.mb.98cbin.1       | 92.75 | 4.757 | 167 |
| Sample_LCC11.Cluster6383       | 89.91 | 1.342 | 23  |
| Sample_LCC11.Cluster3915cbin.1 | 97.21 | 0.806 | 45  |
| Sample_LCC11.mb.16cbin.1       | 81.50 | 1.944 | 228 |
| Sample_LCC11.mb.47cbin.1       | 93.01 | 0.735 | 247 |
| Sample_LCC11.mb.41cbin.1       | 96.37 | 2.956 | 183 |
| Sample_LCC11.mb.11             | 82.66 | 0.000 | 39  |

|                                 |       |       |     |
|---------------------------------|-------|-------|-----|
| Sample_LCC11.mb.64              | 85.39 | 1.398 | 431 |
| Sample_LCC11.mb.33              | 86.29 | 3.355 | 134 |
| Sample_LCC11.mb.52              | 87.58 | 0.671 | 48  |
| Sample_LCC11.Cluster11053       | 97.31 | 0.000 | 35  |
| Sample_LCC11.Cluster25cbin.1    | 94.95 | 0.268 | 175 |
| Sample_LCC11.Cluster10094cbin.1 | 98.65 | 1.006 | 25  |
| Sample_LCC11.Cluster10060cbin.1 | 97.31 | 0.111 | 53  |
| Sample_LCC11.mb.62cbin.1        | 88.52 | 3.355 | 175 |
| Sample_LCC11.Cluster5200        | 95.26 | 0.335 | 17  |
| Sample_LCC11.Cluster2495        | 97.95 | 0.000 | 30  |
| Sample_LCC11.mb.70              | 88.25 | 2.936 | 80  |
| Sample_LCC11.mb.29              | 98.48 | 0.769 | 214 |
| Sample_LCC11.mb.9cbin.1         | 87.02 | 2.839 | 202 |
| Sample_LCC11.Cluster937         | 99.54 | 0.000 | 23  |
| Sample_LCC11.Cluster8812        | 99.32 | 0.000 | 24  |
| Sample_LCC11.Cluster8336cbin.1  | 84.78 | 2.309 | 477 |
| Sample_LCC11.mb.80              | 82.51 | 4.697 | 435 |
| Sample_LCC11.mb.54cbin.1        | 96.49 | 0.000 | 49  |
| Sample_LCC11.Cluster6780        | 95.64 | 0.000 | 52  |
| Sample_LCC11.mb.2               | 93.31 | 1.022 | 233 |
| Sample_LCC11.mb.10              | 96.60 | 0.188 | 67  |
| Sample_LCC12.Cluster3883        | 97.84 | 0.000 | 62  |
| Sample_LCC12.Cluster3277        | 91.93 | 0.000 | 30  |
| Sample_LCC12.mb.114             | 91.57 | 2.247 | 41  |
| Sample_LCC12.Cluster5768        | 84.27 | 0.073 | 12  |
| Sample_LCC12.mb.20              | 91.29 | 1.685 | 28  |
| Sample_LCC12.Cluster12140       | 90.60 | 0.000 | 17  |
| Sample_LCC12.mb.104             | 84.54 | 2.529 | 410 |
| Sample_LCC12.Cluster15287cbin.1 | 98.65 | 1.447 | 43  |
| Sample_LCC12.mb.117             | 90.87 | 0.671 | 119 |
| Sample_LCC12.Cluster59cbin.1    | 88.92 | 4.870 | 208 |
| Sample_LCC12.Cluster836cbin.1   | 93.47 | 4.194 | 78  |
| Sample_LCC12.Cluster8334cbin.1  | 98.99 | 0.000 | 53  |
| Sample_LCC12.Cluster1827        | 88.39 | 0.507 | 47  |
| Sample_LCC12.mb.103cbin.1       | 88.36 | 0.041 | 49  |
| Sample_LCC12.Cluster3878cbin.1  | 95.56 | 0.021 | 81  |
| Sample_LCC12.mb.34cbin.1        | 80.53 | 1.174 | 176 |
| Sample_LCC12.Cluster3959        | 90.67 | 2.013 | 18  |
| Sample_LCC12.mb.111             | 98.38 | 2.419 | 70  |
| Sample_LCC12.mb.91cbin.1        | 96.39 | 2.194 | 98  |
| Sample_LCC12.mb.13              | 88.51 | 0.092 | 369 |
| Sample_LCC12.mb.108cbin.1       | 96.77 | 0.000 | 115 |
| Sample_LCC12.mb.58              | 87.08 | 0.061 | 48  |
| Sample_LCC12.mb.16cbin.1        | 88.59 | 0.671 | 33  |
| Sample_LCC12.mb.119             | 94.12 | 1.342 | 170 |
| Sample_LCC12.mb.62cbin.1        | 83.89 | 4.250 | 50  |
| Sample_LCC12.mb.19cbin.1        | 99.03 | 3.365 | 31  |
| Sample_LCC12.mb.42              | 87.89 | 0.680 | 348 |
| Sample_LCC12.mb.24              | 85.90 | 0.671 | 22  |
| Sample_LCC12.Cluster4565cbin.1  | 87.86 | 2.487 | 280 |
| Sample_LCC12.mb.29              | 97.20 | 0.000 | 83  |
| Sample_LCC12.Cluster9948cbin.1  | 99.11 | 3.209 | 103 |
| Sample_LCC12.mb.99              | 95.07 | 0.915 | 108 |
| Sample_LCC12.mb.49cbin.1        | 95.74 | 0.000 | 80  |
| Sample_LCC12.mb.6               | 93.71 | 1.207 | 51  |
| Sample_LCC12.mb.69              | 93.04 | 2.380 | 266 |
| Sample_LCC12.mb.72              | 89.71 | 1.020 | 168 |
| Sample_LCC12.mb.77              | 96.64 | 0.335 | 52  |

|                                |        |       |     |
|--------------------------------|--------|-------|-----|
| Sample_LCC12.mb.47cbin.1       | 94.44  | 3.723 | 100 |
| Sample_LCC12.mb.81             | 95.44  | 1.282 | 142 |
| Sample_LCC12.mb.22             | 94.77  | 4.010 | 319 |
| Sample_LCC12.mb.35cbin.1       | 98.71  | 1.486 | 79  |
| Sample_LCC12.Cluster134cbin.1  | 97.06  | 0.619 | 249 |
| Sample_LCC12.mb.68cbin.1       | 97.53  | 2.049 | 307 |
| Sample_LCC13.Cluster3327cbin.1 | 96.77  | 1.075 | 42  |
| Sample_LCC13.mb.15             | 81.03  | 3.448 | 129 |
| Sample_LCC13.mb.10cbin.1       | 93.93  | 1.447 | 54  |
| Sample_LCC13.Cluster148cbin.1  | 89.10  | 2.747 | 126 |
| Sample_LCC13.Cluster203cbin.1  | 87.80  | 3.355 | 54  |
| Sample_LCC13.mb.24             | 99.30  | 1.165 | 92  |
| Sample_LCC13.mb.102cbin.1      | 83.30  | 2.013 | 77  |
| Sample_LCC13.mb.107cbin.1      | 88.38  | 4.255 | 74  |
| Sample_LCC13.mb.108cbin.1      | 86.35  | 0.488 | 46  |
| Sample_LCC13.mb.2              | 88.92  | 1.510 | 60  |
| Sample_LCC13.Cluster521cbin.1  | 98.38  | 0.806 | 51  |
| Sample_LCC13.mb.22             | 81.44  | 1.812 | 292 |
| Sample_LCC13.Cluster1228cbin.1 | 98.79  | 0.961 | 71  |
| Sample_LCC13.Cluster2671       | 97.31  | 0.894 | 11  |
| Sample_LCC13.mb.29             | 91.21  | 3.355 | 87  |
| Sample_LCC13.Cluster13355      | 100.00 | 0.000 | 17  |
| Sample_LCC13.Cluster9468cbin.1 | 85.90  | 1.921 | 41  |
| Sample_LCC13.mb.20cbin.1       | 98.01  | 0.862 | 100 |
| Sample_LCC13.Cluster283cbin.1  | 94.58  | 0.000 | 45  |
| Sample_LCC13.mb.18             | 96.63  | 0.000 | 34  |
| Sample_LCC13.Cluster6965cbin.1 | 81.40  | 1.364 | 319 |
| Sample_LCC13.Cluster9914       | 98.65  | 1.006 | 20  |
| Sample_LCC13.mb.1cbin.1        | 91.68  | 1.360 | 310 |
| Sample_LCC13.Cluster19cbin.1   | 96.92  | 0.591 | 67  |
| Sample_LCC13.Cluster477cbin.1  | 99.94  | 1.701 | 33  |
| Sample_LCC13.Cluster8306       | 97.94  | 0.000 | 29  |
| Sample_LCC13.mb.71cbin.1       | 94.74  | 2.013 | 60  |
| Sample_LCC13.mb.53cbin.1       | 82.49  | 2.000 | 306 |
| Sample_LCC13.mb.3              | 97.31  | 1.342 | 88  |
| Sample_LCC13.mb.39cbin.1       | 93.99  | 1.497 | 81  |
| Sample_LCC13.mb.36cbin.1       | 99.05  | 0.000 | 96  |
| Sample_LCC13.mb.74             | 84.29  | 1.006 | 153 |
| Sample_LCC13.Cluster5527       | 99.46  | 0.537 | 64  |
| Sample_LCC13.mb.25             | 87.73  | 0.377 | 40  |
| Sample_LCC13.mb.60             | 92.85  | 2.040 | 149 |
| Sample_LCC13.mb.42cbin.1       | 95.23  | 0.000 | 231 |
| Sample_LCC13.mb.69             | 95.19  | 2.964 | 49  |
| Sample_LCC13.mb.96             | 84.22  | 0.671 | 95  |
| Sample_LCC13.mb.93             | 86.32  | 0.648 | 207 |
| Sample_LCC13.Cluster8065cbin.1 | 91.58  | 2.079 | 320 |
| Sample_LCC13.mb.99cbin.1       | 96.42  | 1.923 | 113 |
| Sample_LCC13.mb.30             | 95.57  | 0.384 | 28  |
| Sample_LCC13.mb.75             | 98.24  | 0.584 | 59  |
| Sample_LCC13.mb.47             | 93.49  | 0.512 | 92  |
| Sample_LCC13.Cluster2164cbin.1 | 99.78  | 0.431 | 113 |
| Sample_LCC13.mb.70             | 96.32  | 1.858 | 45  |
| Sample_LCC13.mb.91cbin.1       | 83.42  | 2.125 | 687 |
| Sample_LCC14.Cluster1275       | 93.95  | 0.832 | 14  |
| Sample_LCC14.Cluster2550       | 99.18  | 0.000 | 22  |
| Sample_LCC14.Cluster964        | 92.61  | 0.000 | 30  |
| Sample_LCC14.mb.40             | 96.64  | 0.000 | 53  |
| Sample_LCC14.mb.3              | 98.65  | 0.671 | 32  |

|                                 |       |       |     |
|---------------------------------|-------|-------|-----|
| Sample_LCC14.mb.37              | 97.31 | 0.671 | 53  |
| Sample_LCC14.mb.50cbin.1        | 89.06 | 4.746 | 598 |
| Sample_LCC14.Cluster677cbin.1   | 83.12 | 0.345 | 398 |
| Sample_LCC14.Cluster315cbin.1   | 94.55 | 0.680 | 224 |
| Sample_LCC14.mb.58cbin.1        | 96.19 | 1.946 | 287 |
| Sample_LCC14.Cluster994         | 99.18 | 0.000 | 61  |
| Sample_LCC14.mb.10              | 83.10 | 1.700 | 67  |
| Sample_LCC14.mb.23cbin.1        | 98.80 | 0.000 | 108 |
| Sample_LCC14.mb.42cbin.1        | 98.95 | 0.000 | 32  |
| Sample_LCC14.mb.83              | 99.22 | 0.000 | 9   |
| Sample_LCC14.mb.62cbin.1        | 91.15 | 0.907 | 59  |
| Sample_LCC14.Cluster234         | 99.27 | 0.480 | 22  |
| Sample_LCC14.mb.48cbin.1        | 94.73 | 0.000 | 62  |
| Sample_LCC14.mb.81cbin.1        | 95.30 | 1.665 | 371 |
| Sample_LCC14.Cluster2264cbin.1  | 83.47 | 0.373 | 67  |
| Sample_LCC14.mb.14cbin.1        | 91.33 | 1.898 | 566 |
| Sample_LCC14.Cluster2175        | 98.51 | 0.185 | 25  |
| Sample_LCC14.mb.64cbin.1        | 95.57 | 0.128 | 121 |
| Sample_LCC14.Cluster2329cbin.1  | 93.13 | 0.000 | 23  |
| Sample_LCC14.mb.27              | 96.61 | 2.364 | 211 |
| Sample_LCC14.mb.72cbin.1        | 96.12 | 4.131 | 380 |
| Sample_LCC15.mb.27cbin.1        | 96.84 | 0.177 | 168 |
| Sample_LCC15.mb.14cbin.1        | 85.25 | 2.764 | 431 |
| Sample_LCC15.Cluster403cbin.1   | 94.83 | 2.325 | 205 |
| Sample_LCC15.mb.9               | 98.40 | 0.104 | 122 |
| Sample_LCC16.mb.28              | 80.31 | 0.671 | 227 |
| Sample_LCC16.Cluster1073cbin.1  | 96.41 | 1.323 | 39  |
| Sample_LCC16.mb.15              | 87.26 | 1.916 | 337 |
| Sample_LCC16.mb.34cbin.1        | 85.26 | 0.000 | 84  |
| Sample_LCC16.mb.29cbin.1        | 97.31 | 0.000 | 18  |
| Sample_LCC16.Cluster2701cbin.1  | 99.32 | 0.671 | 23  |
| Sample_LCC16.mb.5cbin.1         | 94.39 | 0.961 | 36  |
| Sample_LCC16.mb.1cbin.1         | 98.41 | 2.040 | 236 |
| Sample_LCC16.Cluster75cbin.1    | 97.27 | 0.606 | 43  |
| Sample_LCC16.mb.25              | 93.28 | 1.342 | 34  |
| Sample_LCC16.mb.32              | 95.83 | 1.759 | 43  |
| Sample_LCC16.Cluster2570        | 97.10 | 1.449 | 71  |
| Sample_LCC16.Cluster2870cbin.1  | 91.77 | 1.611 | 102 |
| Sample_LCC16.mb.30              | 88.31 | 1.486 | 154 |
| Sample_LCC17.Cluster16446       | 93.82 | 0.000 | 21  |
| Sample_LCC17.Cluster16367       | 91.57 | 4.494 | 13  |
| Sample_LCC17.Cluster16722       | 92.41 | 1.123 | 13  |
| Sample_LCC17.Cluster15858       | 89.33 | 2.777 | 136 |
| Sample_LCC17.Cluster1862cbin.1  | 84.35 | 0.161 | 308 |
| Sample_LCC17.Cluster3097cbin.1  | 93.70 | 0.932 | 65  |
| Sample_LCC17.Cluster15226cbin.1 | 98.65 | 0.000 | 11  |
| Sample_LCC17.Cluster4190cbin.1  | 98.38 | 0.000 | 44  |
| Sample_LCC17.Cluster2315cbin.1  | 94.17 | 2.348 | 88  |
| Sample_LCC17.Cluster180         | 83.68 | 1.342 | 131 |
| Sample_LCC17.Cluster8838        | 97.84 | 0.000 | 41  |
| Sample_LCC17.Cluster12879       | 89.93 | 0.000 | 16  |
| Sample_LCC17.Cluster3989cbin.1  | 96.64 | 1.879 | 28  |
| Sample_LCC17.Cluster15123       | 87.91 | 0.000 | 46  |
| Sample_LCC17.Cluster15926       | 99.20 | 0.000 | 68  |
| Sample_LCC17.Cluster8364        | 94.32 | 0.709 | 53  |
| Sample_LCC17.mb.12cbin.1        | 87.39 | 0.671 | 44  |
| Sample_LCC17.Cluster317         | 98.26 | 0.016 | 131 |
| Sample_LCC17.Cluster4955cbin.1  | 98.55 | 0.961 | 31  |

|                                 |       |       |     |
|---------------------------------|-------|-------|-----|
| Sample_LCC17.Cluster4788cbin.1  | 93.95 | 0.335 | 66  |
| Sample_LCC17.mb.131cbin.1       | 94.07 | 2.013 | 83  |
| Sample_LCC17.mb.36cbin.1        | 96.97 | 4.697 | 20  |
| Sample_LCC17.Cluster44cbin.1    | 94.79 | 2.366 | 207 |
| Sample_LCC17.mb.119             | 92.68 | 2.027 | 199 |
| Sample_LCC17.Cluster9633cbin.1  | 99.03 | 0.961 | 39  |
| Sample_LCC17.mb.74              | 86.66 | 0.000 | 21  |
| Sample_LCC17.Cluster13321cbin.1 | 90.66 | 1.207 | 87  |
| Sample_LCC17.Cluster750cbin.1   | 94.71 | 0.000 | 42  |
| Sample_LCC17.Cluster16120cbin.1 | 99.68 | 1.582 | 96  |
| Sample_LCC17.mb.52cbin.1        | 80.26 | 2.684 | 328 |
| Sample_LCC17.mb.25cbin.1        | 93.40 | 4.260 | 235 |
| Sample_LCC17.mb.53              | 89.11 | 3.243 | 179 |
| Sample_LCC17.Cluster13753cbin.1 | 99.05 | 0.000 | 75  |
| Sample_LCC17.mb.59cbin.1        | 95.30 | 3.477 | 28  |
| Sample_LCC17.mb.22              | 90.73 | 1.057 | 265 |
| Sample_LCC17.mb.120             | 92.61 | 0.671 | 49  |
| Sample_LCC17.Cluster11558cbin.1 | 95.60 | 0.000 | 347 |
| Sample_LCC17.mb.78              | 91.15 | 1.006 | 104 |
| Sample_LCC17.mb.26              | 90.00 | 0.125 | 39  |
| Sample_LCC17.mb.68              | 92.95 | 0.000 | 61  |
| Sample_LCC17.Cluster14361cbin.1 | 87.55 | 1.089 | 533 |
| Sample_LCC17.mb.86              | 87.13 | 0.671 | 268 |
| Sample_LCC17.mb.67cbin.1        | 94.99 | 1.360 | 234 |
| Sample_LCC17.mb.70              | 90.60 | 0.335 | 17  |
| Sample_LCC17.mb.8cbin.1         | 93.23 | 1.449 | 63  |
| Sample_LCC17.mb.88              | 94.63 | 0.000 | 56  |
| Sample_LCC17.mb.95cbin.1        | 91.98 | 4.621 | 261 |
| Sample_LCC17.mb.92cbin.1        | 93.91 | 1.342 | 25  |
| Sample_LCC17.mb.94cbin.1        | 93.85 | 0.894 | 211 |
| Sample_LCC17.mb.112cbin.1       | 95.20 | 2.614 | 163 |
| Sample_LCC17.mb.82              | 96.05 | 0.097 | 143 |
| Sample_LCC17.mb.73              | 96.93 | 0.631 | 37  |
| Sample_LCC19.mb.44              | 93.54 | 0.000 | 50  |
| Sample_LCC19.mb.64              | 91.57 | 3.370 | 42  |
| Sample_LCC19.Cluster45cbin.1    | 90.60 | 0.734 | 18  |
| Sample_LCC19.Cluster2436cbin.1  | 94.83 | 1.265 | 40  |
| Sample_LCC19.mb.43              | 93.67 | 1.265 | 116 |
| Sample_LCC19.Cluster744cbin.1   | 90.08 | 1.682 | 29  |
| Sample_LCC19.Cluster1101        | 94.96 | 0.000 | 8   |
| Sample_LCC19.mb.35              | 90.58 | 1.360 | 219 |
| Sample_LCC19.mb.48cbin.1        | 89.07 | 0.572 | 103 |
| Sample_LCC19.Cluster24cbin.1    | 81.54 | 1.766 | 315 |
| Sample_LCC19.mb.19cbin.1        | 99.32 | 2.684 | 22  |
| Sample_LCC19.Cluster3872cbin.1  | 88.35 | 0.000 | 54  |
| Sample_LCC19.mb.17cbin.1        | 99.84 | 0.113 | 36  |
| Sample_LCC19.Cluster5834cbin.1  | 99.32 | 0.503 | 51  |
| Sample_LCC19.mb.90cbin.1        | 98.76 | 0.000 | 124 |
| Sample_LCC19.mb.45              | 95.96 | 2.320 | 191 |
| Sample_LCC19.mb.85cbin.1        | 90.25 | 1.276 | 41  |
| Sample_LCC19.Cluster1741        | 82.07 | 0.000 | 54  |
| Sample_LCC19.mb.49              | 88.34 | 0.929 | 82  |
| Sample_LCC19.Cluster3286cbin.1  | 95.90 | 2.552 | 344 |
| Sample_LCC19.mb.79              | 88.60 | 1.127 | 129 |
| Sample_LCC19.mb.53cbin.1        | 97.54 | 4.616 | 193 |
| Sample_LCC19.Cluster1812cbin.1  | 80.26 | 1.230 | 472 |
| Sample_LCC19.mb.31cbin.1        | 96.94 | 1.067 | 46  |
| Sample_LCC19.Cluster32          | 96.39 | 0.766 | 74  |

|                                 |        |       |     |
|---------------------------------|--------|-------|-----|
| Sample_LCC20.Cluster10333       | 85.95  | 2.247 | 13  |
| Sample_LCC20.mb.3               | 92.69  | 2.247 | 19  |
| Sample_LCC20.Cluster8196cbin.1  | 97.31  | 0.134 | 23  |
| Sample_LCC20.Cluster247cbin.1   | 97.31  | 0.671 | 45  |
| Sample_LCC20.Cluster427cbin.1   | 92.39  | 1.006 | 100 |
| Sample_LCC20.mb.57              | 93.47  | 0.537 | 216 |
| Sample_LCC20.mb.21              | 99.32  | 0.000 | 26  |
| Sample_LCC20.mb.43cbin.1        | 85.88  | 2.460 | 158 |
| Sample_LCC20.Cluster3708        | 93.28  | 0.000 | 20  |
| Sample_LCC20.mb.60              | 99.30  | 2.284 | 105 |
| Sample_LCC20.mb.44              | 88.92  | 2.852 | 121 |
| Sample_LCC20.Cluster2912cbin.1  | 95.91  | 0.000 | 29  |
| Sample_LCC20.Cluster3319cbin.1  | 98.69  | 1.796 | 202 |
| Sample_LCC20.Cluster689cbin.1   | 97.59  | 1.013 | 46  |
| Sample_LCC20.Cluster5995        | 97.09  | 0.041 | 21  |
| Sample_LCC20.mb.63              | 86.46  | 0.000 | 225 |
| Sample_LCC20.mb.51              | 85.01  | 0.000 | 42  |
| Sample_LCC20.mb.22              | 99.51  | 0.961 | 29  |
| Sample_LCC20.mb.29cbin.1        | 97.98  | 0.335 | 16  |
| Sample_LCC20.mb.75              | 93.40  | 0.000 | 198 |
| Sample_LCC20.mb.32cbin.1        | 98.03  | 0.800 | 143 |
| Sample_LCC20.mb.18              | 93.99  | 0.961 | 62  |
| Sample_LCC20.mb.36cbin.1        | 95.67  | 1.531 | 146 |
| Sample_LCC20.mb.56              | 95.57  | 1.360 | 221 |
| Sample_LCC20.mb.92cbin.1        | 89.93  | 2.999 | 70  |
| Sample_LCC20.Cluster5529        | 97.35  | 0.000 | 18  |
| Sample_LCC20.Cluster5535        | 96.41  | 1.612 | 282 |
| Sample_LCC20.mb.34cbin.1        | 96.60  | 1.376 | 225 |
| Sample_LCC20.mb.62              | 96.04  | 4.429 | 204 |
| Sample_LCC20.mb.94cbin.1        | 97.47  | 2.365 | 345 |
| Sample_LCC20.Cluster3175        | 98.47  | 0.989 | 43  |
| Sample_LCC20.Cluster625         | 96.07  | 0.106 | 43  |
| Sample_LCC21.Cluster13810cbin.1 | 87.35  | 2.247 | 152 |
| Sample_LCC21.Cluster163         | 88.04  | 2.016 | 160 |
| Sample_LCC21.mb.33cbin.1        | 94.75  | 1.075 | 72  |
| Sample_LCC21.mb.50cbin.1        | 85.04  | 0.854 | 179 |
| Sample_LCC21.mb.31              | 88.01  | 3.355 | 314 |
| Sample_LCC21.Cluster4626        | 89.25  | 0.074 | 45  |
| Sample_LCC21.mb.43              | 93.28  | 0.000 | 47  |
| Sample_LCC21.Cluster10978cbin.1 | 99.51  | 2.797 | 51  |
| Sample_LCC21.Cluster4492cbin.1  | 87.67  | 0.747 | 247 |
| Sample_LCC21.Cluster5920        | 96.21  | 0.898 | 93  |
| Sample_LCC21.mb.104             | 94.63  | 0.000 | 38  |
| Sample_LCC21.Cluster11322       | 99.32  | 2.013 | 20  |
| Sample_LCC21.mb.92cbin.1        | 92.59  | 1.342 | 34  |
| Sample_LCC21.Cluster5138cbin.1  | 96.93  | 1.677 | 24  |
| Sample_LCC21.mb.79cbin.1        | 84.31  | 4.026 | 32  |
| Sample_LCC21.mb.57cbin.1        | 90.18  | 3.571 | 224 |
| Sample_LCC21.mb.107cbin.1       | 98.65  | 0.000 | 18  |
| Sample_LCC21.mb.46              | 97.09  | 0.000 | 27  |
| Sample_LCC21.mb.70              | 84.09  | 4.308 | 216 |
| Sample_LCC21.mb.75              | 98.99  | 0.000 | 76  |
| Sample_LCC21.Cluster8966cbin.1  | 98.63  | 0.000 | 42  |
| Sample_LCC21.Cluster1186cbin.1  | 98.31  | 3.605 | 42  |
| Sample_LCC21.Cluster13247cbin.1 | 100.00 | 0.632 | 79  |
| Sample_LCC21.Cluster9689cbin.1  | 98.50  | 3.960 | 455 |
| Sample_LCC21.mb.99cbin.1        | 89.65  | 2.040 | 460 |
| Sample_LCC21.Cluster1714cbin.1  | 92.50  | 2.307 | 556 |

|                                |        |       |     |
|--------------------------------|--------|-------|-----|
| Sample_LCC21.mb.71cbin.1       | 99.58  | 1.184 | 162 |
| Sample_LCC22.Cluster11576      | 85.33  | 0.000 | 33  |
| Sample_LCC22.Cluster2424       | 96.77  | 0.097 | 35  |
| Sample_LCC22.mb.22cbin.1       | 91.75  | 1.677 | 135 |
| Sample_LCC22.mb.27             | 88.88  | 0.854 | 31  |
| Sample_LCC22.mb.18cbin.1       | 99.30  | 1.165 | 83  |
| Sample_LCC22.Cluster385        | 91.27  | 0.335 | 52  |
| Sample_LCC22.mb.11cbin.1       | 96.64  | 0.000 | 72  |
| Sample_LCC22.mb.40cbin.1       | 95.61  | 2.348 | 137 |
| Sample_LCC22.Cluster128        | 99.19  | 1.612 | 51  |
| Sample_LCC22.mb.35             | 91.96  | 0.671 | 65  |
| Sample_LCC22.Cluster6998       | 95.97  | 0.000 | 9   |
| Sample_LCC22.Cluster3715       | 99.40  | 0.898 | 41  |
| Sample_LCC22.mb.47             | 89.81  | 0.000 | 198 |
| Sample_LCC22.Cluster9158       | 94.63  | 0.335 | 27  |
| Sample_LCC22.mb.16             | 88.81  | 3.911 | 110 |
| Sample_LCC22.mb.46cbin.1       | 95.97  | 0.000 | 130 |
| Sample_LCC22.mb.36             | 88.40  | 2.342 | 65  |
| Sample_LCC22.Cluster278        | 97.95  | 0.000 | 27  |
| Sample_LCC22.mb.2cbin.1        | 86.12  | 3.152 | 438 |
| Sample_LCC22.Cluster8027cbin.1 | 98.63  | 0.000 | 46  |
| Sample_LCC22.mb.19             | 96.61  | 0.000 | 46  |
| Sample_LCC22.mb.37             | 92.61  | 0.894 | 21  |
| Sample_LCC22.mb.76             | 93.95  | 0.671 | 30  |
| Sample_LCC22.Cluster6899cbin.1 | 80.24  | 2.065 | 79  |
| Sample_LCC22.mb.34cbin.1       | 95.86  | 2.364 | 137 |
| Sample_LCC22.mb.62cbin.1       | 95.43  | 2.644 | 94  |
| Sample_LCC22.mb.58             | 97.37  | 1.250 | 83  |
| Sample_LCC22.mb.81cbin.1       | 82.80  | 2.154 | 238 |
| Sample_LCC22.mb.31cbin.1       | 88.06  | 0.371 | 87  |
| Sample_LCC22.mb.29cbin.1       | 98.73  | 4.236 | 380 |
| Sample_LCC22.Cluster8294cbin.1 | 89.04  | 2.389 | 180 |
| Sample_LCC22.mb.87             | 99.32  | 0.000 | 26  |
| Sample_LCC22.mb.38             | 90.25  | 2.820 | 78  |
| Sample_LCC22.mb.50             | 94.45  | 0.769 | 139 |
| Sample_LCC22.mb.5cbin.1        | 94.71  | 1.971 | 276 |
| Sample_LCC22.mb.92cbin.1       | 93.08  | 0.588 | 193 |
| Sample_LCC22.mb.90cbin.1       | 99.59  | 0.037 | 56  |
| Sample_LCC23.mb.89cbin.1       | 98.24  | 4.784 | 137 |
| Sample_LCC23.mb.18cbin.1       | 87.19  | 4.865 | 294 |
| Sample_LCC23.Cluster156        | 95.67  | 0.806 | 28  |
| Sample_LCC23.mb.47             | 88.92  | 1.342 | 34  |
| Sample_LCC23.Cluster3cbin.1    | 100.00 | 0.806 | 56  |
| Sample_LCC23.Cluster976cbin.1  | 92.29  | 0.740 | 56  |
| Sample_LCC23.Cluster311cbin.1  | 97.95  | 0.000 | 114 |
| Sample_LCC23.Cluster8057       | 96.64  | 1.006 | 19  |
| Sample_LCC23.mb.17             | 82.16  | 2.599 | 107 |
| Sample_LCC23.Cluster9143       | 98.65  | 0.335 | 14  |
| Sample_LCC23.mb.93cbin.1       | 93.95  | 0.000 | 35  |
| Sample_LCC23.mb.26             | 93.92  | 2.237 | 126 |
| Sample_LCC23.mb.55             | 98.61  | 0.961 | 59  |
| Sample_LCC23.Cluster44cbin.1   | 93.78  | 0.621 | 97  |
| Sample_LCC23.mb.19             | 88.52  | 2.021 | 337 |
| Sample_LCC23.mb.83cbin.1       | 96.55  | 1.497 | 116 |
| Sample_LCC23.Cluster7957cbin.1 | 94.62  | 1.582 | 66  |
| Sample_LCC23.mb.54cbin.1       | 89.43  | 0.754 | 42  |
| Sample_LCC23.mb.57             | 93.47  | 3.450 | 45  |
| Sample_LCC23.mb.14             | 87.00  | 2.375 | 153 |



|                                |        |       |     |
|--------------------------------|--------|-------|-----|
| Sample_LCC23.mb.72cbin.1       | 85.07  | 0.377 | 52  |
| Sample_LCC23.mb.98             | 98.65  | 0.000 | 24  |
| Sample_LCC23.mb.87cbin.1       | 85.84  | 2.267 | 186 |
| Sample_LCC23.mb.6              | 98.55  | 0.000 | 83  |
| Sample_LCC23.mb.23cbin.1       | 92.30  | 0.897 | 92  |
| Sample_LCC23.Cluster310cbin.1  | 96.44  | 1.268 | 339 |
| Sample_LCC24.Cluster5757       | 87.72  | 0.732 | 372 |
| Sample_LCC24.Cluster3364cbin.1 | 93.09  | 2.572 | 242 |
| Sample_LCC24.Cluster82cbin.1   | 94.63  | 2.446 | 154 |
| Sample_LCC24.Cluster946        | 90.60  | 0.000 | 111 |
| Sample_LCC24.mb.18             | 92.74  | 0.806 | 64  |
| Sample_LCC24.mb.53cbin.1       | 92.51  | 3.817 | 259 |
| Sample_LCC24.Cluster172cbin.1  | 90.96  | 1.548 | 193 |
| Sample_LCC24.Cluster78cbin.1   | 92.21  | 1.136 | 121 |
| Sample_LCC24.mb.31             | 89.55  | 0.793 | 366 |
| Sample_LCC24.mb.15             | 95.96  | 0.961 | 52  |
| Sample_LCC24.mb.21             | 97.22  | 1.776 | 148 |
| Sample_LCC24.Cluster6435cbin.1 | 99.47  | 0.000 | 29  |
| Sample_LCC24.mb.23cbin.1       | 97.98  | 0.671 | 16  |
| Sample_LCC24.Cluster44         | 98.13  | 0.621 | 79  |
| Sample_LCC24.mb.4              | 93.08  | 2.684 | 165 |
| Sample_LCC24.mb.50cbin.1       | 98.50  | 0.000 | 43  |
| Sample_LCC24.Cluster2026cbin.1 | 91.50  | 0.062 | 75  |
| Sample_LCC24.mb.26             | 96.79  | 2.163 | 36  |
| Sample_LCC24.Cluster4973cbin.1 | 93.69  | 3.922 | 300 |
| Sample_LCC24.mb.42             | 88.04  | 3.954 | 190 |
| Sample_LCC24.mb.40cbin.1       | 99.27  | 1.378 | 57  |
| Sample_LCC24.mb.60             | 88.99  | 4.272 | 296 |
| Sample_LCC24.Cluster1831       | 91.41  | 0.384 | 159 |
| Sample_LCC25.mb.22cbin.1       | 97.78  | 2.215 | 194 |
| Sample_LCC25.mb.1              | 80.22  | 2.109 | 344 |
| Sample_LCC25.Cluster6741cbin.1 | 86.38  | 1.408 | 345 |
| Sample_LCC25.mb.2              | 98.92  | 0.806 | 111 |
| Sample_LCC25.mb.31cbin.1       | 86.43  | 1.836 | 405 |
| Sample_LCC25.mb.35             | 91.83  | 0.722 | 57  |
| Sample_LCC25.Cluster2894       | 99.38  | 1.497 | 20  |
| Sample_LCC25.Cluster5887       | 86.91  | 1.677 | 171 |
| Sample_LCC25.mb.12             | 99.32  | 2.684 | 23  |
| Sample_LCC25.mb.3cbin.1        | 92.75  | 1.709 | 293 |
| Sample_LCC25.mb.73             | 97.59  | 1.442 | 25  |
| Sample_LCC25.Cluster1411cbin.1 | 96.00  | 1.604 | 135 |
| Sample_LCC25.mb.37cbin.1       | 98.06  | 0.644 | 109 |
| Sample_LCC25.Cluster4290       | 85.99  | 0.362 | 46  |
| Sample_LCC25.Cluster6913       | 98.87  | 1.123 | 82  |
| Sample_LCC25.mb.5cbin.1        | 100.00 | 0.000 | 19  |
| Sample_LCC25.Cluster2423cbin.1 | 86.47  | 1.492 | 53  |
| Sample_LCC25.Cluster2907cbin.1 | 98.79  | 1.932 | 122 |
| Sample_LCC25.mb.59cbin.1       | 100.00 | 0.632 | 68  |
| Sample_LCC25.Cluster976cbin.1  | 93.67  | 2.631 | 161 |
| Sample_LCC25.mb.21cbin.1       | 99.92  | 0.562 | 117 |
| Sample_LPA01.Cluster5570cbin.1 | 87.81  | 1.956 | 311 |
| Sample_LPA01.Cluster9393       | 98.65  | 0.000 | 13  |
| Sample_LPA01.Cluster3463cbin.1 | 97.98  | 0.000 | 49  |
| Sample_LPA01.mb.8              | 81.03  | 1.724 | 102 |
| Sample_LPA01.mb.54             | 89.70  | 1.342 | 52  |
| Sample_LPA01.Cluster1315cbin.1 | 98.10  | 0.021 | 83  |
| Sample_LPA01.Cluster658cbin.1  | 92.30  | 0.961 | 27  |
| Sample_LPA01.Cluster90cbin.1   | 98.65  | 0.020 | 39  |

|                                 |        |       |     |
|---------------------------------|--------|-------|-----|
| Sample_LPA01.mb.57cbin.1        | 89.96  | 2.307 | 253 |
| Sample_LPA01.Cluster9888        | 87.91  | 0.335 | 48  |
| Sample_LPA01.mb.13              | 88.74  | 2.517 | 145 |
| Sample_LPA01.mb.27cbin.1        | 96.25  | 0.680 | 240 |
| Sample_LPA01.mb.87cbin.1        | 95.10  | 2.564 | 109 |
| Sample_LPA01.mb.61cbin.1        | 87.67  | 2.551 | 200 |
| Sample_LPA01.mb.21cbin.1        | 96.12  | 1.250 | 150 |
| Sample_LPA01.mb.78cbin.1        | 96.72  | 1.898 | 106 |
| Sample_LPA01.Cluster9248cbin.1  | 94.63  | 1.342 | 23  |
| Sample_LPA01.Cluster10199cbin.1 | 100.00 | 0.632 | 80  |
| Sample_LPA01.mb.74              | 99.19  | 1.075 | 87  |
| Sample_LPA01.mb.34              | 97.27  | 2.040 | 162 |
| Sample_LPA01.mb.67              | 95.65  | 1.449 | 59  |
| Sample_LPA01.mb.15cbin.1        | 94.72  | 4.106 | 48  |
| Sample_LPA01.mb.16              | 93.88  | 1.690 | 54  |
| Sample_LPA01.Cluster1542cbin.1  | 95.52  | 0.464 | 140 |
| Sample_LPA01.mb.23              | 92.45  | 0.377 | 30  |
| Sample_LPA01.mb.20cbin.1        | 99.29  | 0.105 | 107 |
| Sample_LPA01.mb.81cbin.1        | 97.94  | 0.000 | 30  |
| Sample_LPA01.Cluster3577cbin.1  | 96.99  | 0.000 | 85  |
| Sample_LPA01.mb.101             | 95.45  | 0.576 | 143 |
| Sample_LPA01.mb.90              | 91.02  | 0.512 | 33  |
| Sample_LPA02.Cluster15863       | 92.69  | 2.808 | 21  |
| Sample_LPA02.Cluster6186        | 84.11  | 2.404 | 397 |
| Sample_LPA02.Cluster7901        | 92.17  | 0.000 | 25  |
| Sample_LPA02.Cluster4739cbin.1  | 94.39  | 2.531 | 265 |
| Sample_LPA02.Cluster184cbin.1   | 94.29  | 0.671 | 79  |
| Sample_LPA02.Cluster3382        | 97.31  | 0.000 | 11  |
| Sample_LPA02.Cluster5710        | 96.98  | 0.898 | 25  |
| Sample_LPA02.mb.63              | 93.53  | 0.000 | 6   |
| Sample_LPA02.Cluster2508cbin.1  | 99.54  | 0.454 | 24  |
| Sample_LPA02.mb.101             | 92.22  | 1.602 | 261 |
| Sample_LPA02.mb.103cbin.1       | 95.94  | 0.370 | 63  |
| Sample_LPA02.mb.116             | 89.28  | 1.454 | 154 |
| Sample_LPA02.mb.104cbin.1       | 97.27  | 1.230 | 41  |
| Sample_LPA02.mb.36              | 87.69  | 1.342 | 46  |
| Sample_LPA02.mb.129             | 96.42  | 2.348 | 123 |
| Sample_LPA02.mb.57              | 88.44  | 3.264 | 91  |
| Sample_LPA02.mb.97              | 87.50  | 0.000 | 33  |
| Sample_LPA02.mb.17              | 95.97  | 0.671 | 26  |
| Sample_LPA02.mb.16              | 95.30  | 0.671 | 26  |
| Sample_LPA02.mb.45cbin.1        | 99.53  | 0.245 | 33  |
| Sample_LPA02.mb.39              | 96.61  | 2.415 | 97  |
| Sample_LPA02.mb.44              | 98.79  | 2.227 | 115 |
| Sample_LPA02.mb.88              | 89.70  | 3.225 | 198 |
| Sample_LPA02.mb.52              | 86.03  | 3.081 | 115 |
| Sample_LPA02.mb.28              | 85.82  | 0.000 | 60  |
| Sample_LPA02.mb.81              | 94.29  | 1.342 | 154 |
| Sample_LPA02.mb.83              | 97.09  | 0.000 | 33  |
| Sample_LPA02.mb.59              | 97.46  | 0.194 | 68  |
| Sample_LPA02.mb.91              | 99.32  | 1.006 | 33  |
| Sample_LPA02.mb.80cbin.1        | 89.98  | 4.170 | 301 |
| Sample_LPA02.mb.92              | 89.87  | 1.898 | 150 |
| Sample_LPA02.Cluster2225cbin.1  | 97.75  | 0.782 | 276 |
| Sample_LPA02.mb.50cbin.1        | 96.34  | 0.769 | 102 |
| Sample_LPA03.mb.38              | 91.29  | 1.123 | 24  |
| Sample_LPA03.mb.44              | 92.69  | 3.370 | 21  |
| Sample_LPA03.mb.48              | 91.57  | 2.407 | 21  |

|                                 |        |       |     |
|---------------------------------|--------|-------|-----|
| Sample_LPA03.mb.24              | 98.38  | 1.148 | 80  |
| Sample_LPA03.mb.52              | 94.38  | 3.566 | 42  |
| Sample_LPA03.mb.36              | 99.19  | 0.806 | 33  |
| Sample_LPA03.mb.21              | 93.93  | 1.342 | 32  |
| Sample_LPA03.mb.15              | 92.63  | 2.797 | 113 |
| Sample_LPA03.mb.7               | 93.82  | 2.407 | 34  |
| Sample_LPA03.Cluster989cbin.1   | 86.35  | 2.684 | 247 |
| Sample_LPA03.Cluster907cbin.1   | 98.38  | 2.248 | 61  |
| Sample_LPA03.mb.55cbin.1        | 97.36  | 0.000 | 28  |
| Sample_LPA03.mb.66              | 92.74  | 1.677 | 208 |
| Sample_LPA03.mb.42cbin.1        | 92.28  | 2.348 | 38  |
| Sample_LPA03.Cluster245cbin.1   | 86.74  | 1.342 | 98  |
| Sample_LPA03.mb.30              | 90.12  | 1.476 | 322 |
| Sample_LPA03.mb.23cbin.1        | 84.53  | 4.535 | 629 |
| Sample_LPA03.mb.67              | 85.79  | 3.523 | 47  |
| Sample_LPA03.Cluster2348        | 92.70  | 0.000 | 25  |
| Sample_LPA03.Cluster1473        | 97.95  | 0.000 | 17  |
| Sample_LPA03.mb.10cbin.1        | 97.98  | 0.335 | 34  |
| Sample_LPA03.mb.57cbin.1        | 99.32  | 0.671 | 65  |
| Sample_LPA03.mb.53              | 93.19  | 1.360 | 123 |
| Sample_LPA03.mb.40              | 99.90  | 1.136 | 20  |
| Sample_LPA03.mb.17cbin.1        | 93.18  | 0.555 | 400 |
| Sample_LPA03.Cluster5054cbin.1  | 91.28  | 4.216 | 593 |
| Sample_LPA03.mb.50cbin.1        | 98.99  | 0.621 | 188 |
| Sample_LPA04.Cluster13204       | 93.93  | 0.111 | 129 |
| Sample_LPA04.Cluster7577        | 91.23  | 1.398 | 12  |
| Sample_LPA04.mb.3               | 98.38  | 0.000 | 44  |
| Sample_LPA04.Cluster724         | 96.77  | 0.000 | 23  |
| Sample_LPA04.mb.54cbin.1        | 91.57  | 4.494 | 37  |
| Sample_LPA04.Cluster12181cbin.1 | 84.27  | 0.671 | 332 |
| Sample_LPA04.mb.23              | 91.21  | 0.840 | 109 |
| Sample_LPA04.mb.52cbin.1        | 87.33  | 2.688 | 16  |
| Sample_LPA04.Cluster612cbin.1   | 88.56  | 1.510 | 66  |
| Sample_LPA04.mb.58              | 93.06  | 3.020 | 199 |
| Sample_LPA04.mb.16              | 85.47  | 1.380 | 325 |
| Sample_LPA04.mb.19              | 90.15  | 1.833 | 118 |
| Sample_LPA04.mb.76              | 99.19  | 1.075 | 47  |
| Sample_LPA04.mb.79cbin.1        | 80.70  | 0.000 | 16  |
| Sample_LPA04.mb.51              | 95.95  | 0.000 | 98  |
| Sample_LPA04.mb.75              | 92.05  | 1.677 | 173 |
| Sample_LPA04.Cluster5076        | 95.98  | 1.347 | 77  |
| Sample_LPA04.mb.63              | 81.36  | 1.812 | 286 |
| Sample_LPA04.Cluster1103cbin.1  | 100.00 | 0.000 | 41  |
| Sample_LPA04.mb.59              | 86.24  | 2.379 | 157 |
| Sample_LPA04.mb.37              | 94.31  | 0.625 | 93  |
| Sample_LPA04.Cluster3136        | 97.95  | 1.360 | 29  |
| Sample_LPA04.mb.72              | 84.30  | 2.852 | 180 |
| Sample_LPA04.mb.57              | 98.38  | 1.075 | 87  |
| Sample_LPA04.Cluster12331       | 92.93  | 0.020 | 68  |
| Sample_LPA04.mb.30              | 97.35  | 0.335 | 41  |
| Sample_LPA04.mb.80              | 95.63  | 2.013 | 457 |
| Sample_LPA04.mb.42cbin.1        | 98.63  | 1.183 | 194 |
| Sample_LPA04.mb.87              | 86.82  | 0.671 | 95  |
| Sample_LPA04.mb.70              | 92.08  | 1.342 | 230 |
| Sample_LPA04.Cluster1856        | 90.38  | 1.442 | 32  |
| Sample_LPA04.Cluster9609        | 97.73  | 0.000 | 16  |
| Sample_LPA04.mb.92cbin.1        | 98.40  | 1.702 | 135 |
| Sample_LPA04.Cluster8097cbin.1  | 99.41  | 0.487 | 178 |

|                                 |        |       |     |
|---------------------------------|--------|-------|-----|
| Sample_LPA04.mb.95cbin.1        | 87.73  | 2.122 | 200 |
| Sample_LPA04.mb.5cbin.1         | 90.92  | 2.307 | 365 |
| Sample_LPA04.Cluster7322cbin.1  | 97.06  | 0.150 | 59  |
| Sample_LPA04.mb.2               | 98.77  | 0.093 | 35  |
| Sample_LPA05.mb.13              | 90.44  | 4.494 | 47  |
| Sample_LPA05.mb.17              | 96.77  | 0.000 | 58  |
| Sample_LPA05.Cluster12739cbin.1 | 88.45  | 4.362 | 375 |
| Sample_LPA05.Cluster2994cbin.1  | 93.77  | 3.500 | 335 |
| Sample_LPA05.Cluster147cbin.1   | 86.46  | 4.070 | 491 |
| Sample_LPA05.Cluster1752cbin.1  | 86.31  | 2.908 | 265 |
| Sample_LPA05.mb.3               | 99.30  | 1.165 | 113 |
| Sample_LPA05.Cluster11436cbin.1 | 94.27  | 2.095 | 232 |
| Sample_LPA05.mb.44cbin.1        | 95.58  | 3.691 | 227 |
| Sample_LPA05.mb.16              | 90.54  | 2.533 | 297 |
| Sample_LPA05.mb.38cbin.1        | 84.56  | 1.565 | 267 |
| Sample_LPA05.mb.22              | 97.06  | 1.612 | 149 |
| Sample_LPA05.Cluster10884       | 99.32  | 0.671 | 26  |
| Sample_LPA05.mb.46              | 97.58  | 1.706 | 42  |
| Sample_LPA05.Cluster625cbin.1   | 100.00 | 0.681 | 19  |
| Sample_LPA05.Cluster223cbin.1   | 81.45  | 1.490 | 435 |
| Sample_LPA05.Cluster8593        | 99.32  | 0.000 | 19  |
| Sample_LPA05.mb.62cbin.1        | 97.31  | 0.671 | 141 |
| Sample_LPA05.mb.50cbin.1        | 94.28  | 1.476 | 410 |
| Sample_LPA05.mb.55              | 95.46  | 0.680 | 319 |
| Sample_LPA05.mb.2               | 98.06  | 0.483 | 55  |
| Sample_LPA05.mb.45cbin.1        | 89.35  | 2.270 | 168 |
| Sample_LPA05.mb.59cbin.1        | 99.53  | 0.115 | 86  |
| Sample_LPA05.mb.25              | 94.33  | 0.000 | 46  |
| Sample_LPA05.mb.14cbin.1        | 96.30  | 1.115 | 169 |
| Sample_LPA05.Cluster3925cbin.1  | 96.50  | 1.807 | 207 |
| Sample_LPA05.mb.84              | 99.34  | 0.747 | 27  |
| Sample_LPA08.mb.35cbin.1        | 81.03  | 0.000 | 105 |
| Sample_LPA08.mb.19              | 93.73  | 2.684 | 134 |
| Sample_LPA08.Cluster126cbin.1   | 95.98  | 0.000 | 150 |
| Sample_LPA08.Cluster13cbin.1    | 88.81  | 2.796 | 148 |
| Sample_LPA08.Cluster103         | 95.97  | 0.671 | 47  |
| Sample_LPA08.mb.41              | 90.93  | 0.559 | 94  |
| Sample_LPA08.mb.34cbin.1        | 90.93  | 0.000 | 27  |
| Sample_LPA08.mb.43              | 92.61  | 2.348 | 56  |
| Sample_LPA08.mb.65cbin.1        | 92.11  | 1.140 | 236 |
| Sample_LPA08.Cluster1168cbin.1  | 94.15  | 0.961 | 21  |
| Sample_LPA08.Cluster449         | 97.31  | 0.000 | 8   |
| Sample_LPA08.Cluster3810cbin.1  | 99.98  | 1.497 | 27  |
| Sample_LPA08.mb.30cbin.1        | 99.32  | 1.006 | 17  |
| Sample_LPA08.Cluster818cbin.1   | 96.40  | 0.000 | 36  |
| Sample_LPA08.mb.23cbin.1        | 96.71  | 0.545 | 111 |
| Sample_LPA08.Cluster111cbin.1   | 97.11  | 0.000 | 36  |
| Sample_LPA08.mb.63              | 94.07  | 1.739 | 141 |
| Sample_LPA08.mb.67              | 90.70  | 0.000 | 117 |
| Sample_LPA08.mb.17              | 97.26  | 0.000 | 44  |
| Sample_LPA08.mb.37              | 99.05  | 0.000 | 82  |
| Sample_LPA08.Cluster2626cbin.1  | 80.12  | 1.509 | 469 |
| Sample_LPA08.mb.47              | 97.55  | 0.588 | 144 |
| Sample_LPA08.Cluster24cbin.1    | 98.22  | 0.000 | 314 |
| Sample_LPA08.mb.49              | 92.64  | 0.000 | 39  |
| Sample_LPA08.Cluster5160cbin.1  | 99.03  | 4.347 | 82  |
| Sample_LPA08.Cluster2236cbin.1  | 97.66  | 0.292 | 66  |
| Sample_LPA08.Cluster548cbin.1   | 99.20  | 0.738 | 191 |

|                                 |       |       |     |
|---------------------------------|-------|-------|-----|
| Sample_LPA08.Cluster1301        | 95.38 | 0.000 | 51  |
| Sample_LPB01.Cluster213cbin.1   | 90.60 | 0.671 | 28  |
| Sample_LPB01.mb.30cbin.1        | 88.23 | 4.087 | 308 |
| Sample_LPB01.mb.21cbin.1        | 99.32 | 3.125 | 128 |
| Sample_LPB01.mb.41              | 91.75 | 0.000 | 224 |
| Sample_LPB01.Cluster1684cbin.1  | 90.44 | 0.100 | 110 |
| Sample_LPB01.mb.63cbin.1        | 92.64 | 2.340 | 296 |
| Sample_LPB01.mb.84              | 98.65 | 0.000 | 7   |
| Sample_LPB01.Cluster3819cbin.1  | 97.10 | 2.705 | 68  |
| Sample_LPB01.mb.27              | 93.75 | 1.442 | 24  |
| Sample_LPB01.Cluster1675        | 96.60 | 0.000 | 21  |
| Sample_LPB01.Cluster5666        | 85.50 | 2.367 | 25  |
| Sample_LPB01.mb.22              | 94.63 | 0.000 | 24  |
| Sample_LPB01.mb.59cbin.1        | 93.28 | 1.006 | 64  |
| Sample_LPB01.mb.61cbin.1        | 94.55 | 4.761 | 240 |
| Sample_LPB01.Cluster9682        | 92.95 | 4.026 | 25  |
| Sample_LPB01.Cluster1317cbin.1  | 90.79 | 4.086 | 176 |
| Sample_LPB01.Cluster7622cbin.1  | 97.10 | 0.724 | 86  |
| Sample_LPB01.Cluster10035       | 97.46 | 0.632 | 89  |
| Sample_LPB01.mb.18              | 96.79 | 0.000 | 28  |
| Sample_LPB01.Cluster4014cbin.1  | 96.48 | 0.537 | 374 |
| Sample_LPB01.Cluster1905cbin.1  | 93.95 | 0.000 | 114 |
| Sample_LPB01.mb.95              | 95.51 | 2.358 | 199 |
| Sample_LPB01.mb.42              | 92.29 | 4.377 | 226 |
| Sample_LPB01.mb.94cbin.1        | 94.39 | 0.000 | 23  |
| Sample_LPB01.Cluster1739cbin.1  | 97.56 | 0.792 | 188 |
| Sample_LPB01.mb.75              | 97.45 | 3.365 | 42  |
| Sample_LPB02.Cluster13993       | 98.65 | 0.000 | 12  |
| Sample_LPB02.Cluster7087        | 92.17 | 0.000 | 27  |
| Sample_LPB02.Cluster1263cbin.1  | 90.53 | 1.342 | 258 |
| Sample_LPB02.Cluster10625cbin.1 | 96.64 | 0.000 | 44  |
| Sample_LPB02.mb.18cbin.1        | 88.48 | 0.000 | 15  |
| Sample_LPB02.Cluster215cbin.1   | 82.82 | 3.061 | 372 |
| Sample_LPB02.Cluster3912cbin.1  | 97.03 | 0.370 | 54  |
| Sample_LPB02.Cluster10803cbin.1 | 91.98 | 1.677 | 23  |
| Sample_LPB02.Cluster440         | 94.13 | 2.800 | 26  |
| Sample_LPB02.Cluster5269cbin.1  | 86.32 | 2.815 | 253 |
| Sample_LPB02.Cluster12684       | 96.17 | 0.000 | 33  |
| Sample_LPB02.Cluster4672        | 90.32 | 0.289 | 59  |
| Sample_LPB02.mb.116             | 97.31 | 0.000 | 12  |
| Sample_LPB02.Cluster13006cbin.1 | 97.27 | 3.243 | 67  |
| Sample_LPB02.Cluster5645cbin.1  | 88.80 | 0.000 | 54  |
| Sample_LPB02.mb.117             | 89.55 | 3.970 | 157 |
| Sample_LPB02.mb.32              | 96.25 | 0.671 | 121 |
| Sample_LPB02.mb.28cbin.1        | 97.67 | 1.898 | 38  |
| Sample_LPB02.mb.111             | 95.07 | 0.000 | 25  |
| Sample_LPB02.Cluster9005cbin.1  | 93.58 | 1.702 | 86  |
| Sample_LPB02.mb.126             | 98.07 | 0.961 | 54  |
| Sample_LPB02.mb.129             | 99.32 | 1.006 | 38  |
| Sample_LPB02.mb.56              | 88.79 | 1.026 | 26  |
| Sample_LPB02.Cluster4541cbin.1  | 93.27 | 0.806 | 419 |
| Sample_LPB02.mb.48              | 80.11 | 4.919 | 284 |
| Sample_LPB02.mb.134             | 94.63 | 0.000 | 26  |
| Sample_LPB02.mb.33cbin.1        | 95.80 | 0.299 | 33  |
| Sample_LPB02.mb.47              | 98.65 | 0.335 | 38  |
| Sample_LPB02.mb.67              | 93.95 | 2.953 | 134 |
| Sample_LPB02.Cluster5495        | 96.00 | 0.524 | 78  |
| Sample_LPB02.mb.89              | 84.22 | 1.647 | 69  |

|                                 |        |       |     |
|---------------------------------|--------|-------|-----|
| Sample_LPB02.mb.86              | 96.08  | 0.000 | 90  |
| Sample_LPB02.mb.26cbin.1        | 91.25  | 0.543 | 131 |
| Sample_LPB02.mb.96cbin.1        | 96.42  | 0.000 | 162 |
| Sample_LPB02.mb.57cbin.1        | 89.24  | 0.000 | 45  |
| Sample_LPB02.mb.49              | 95.97  | 2.013 | 41  |
| Sample_LPB02.mb.51              | 88.60  | 4.113 | 206 |
| Sample_LPB02.mb.4               | 88.51  | 0.000 | 78  |
| Sample_LPB02.mb.68              | 98.55  | 2.403 | 49  |
| Sample_LPB02.mb.62              | 90.83  | 2.485 | 235 |
| Sample_LPB02.mb.83              | 93.50  | 3.508 | 269 |
| Sample_LPB03.mb.17              | 87.07  | 1.123 | 11  |
| Sample_LPB03.mb.18              | 93.82  | 1.284 | 35  |
| Sample_LPB03.mb.24              | 87.93  | 2.407 | 21  |
| Sample_LPB03.Cluster8614cbin.1  | 80.74  | 2.887 | 329 |
| Sample_LPB03.Cluster557cbin.1   | 98.38  | 4.032 | 37  |
| Sample_LPB03.mb.38              | 91.93  | 1.881 | 91  |
| Sample_LPB03.Cluster949cbin.1   | 98.60  | 0.466 | 96  |
| Sample_LPB03.mb.4               | 83.17  | 0.671 | 88  |
| Sample_LPB03.Cluster155         | 87.61  | 1.677 | 189 |
| Sample_LPB03.mb.13              | 90.60  | 0.671 | 48  |
| Sample_LPB03.mb.71cbin.1        | 92.41  | 1.123 | 23  |
| Sample_LPB03.mb.61              | 91.66  | 1.638 | 131 |
| Sample_LPB03.mb.53cbin.1        | 87.25  | 2.796 | 269 |
| Sample_LPB03.Cluster637cbin.1   | 85.65  | 4.697 | 41  |
| Sample_LPB03.Cluster4384cbin.1  | 82.23  | 2.705 | 376 |
| Sample_LPB03.mb.39              | 99.19  | 0.115 | 26  |
| Sample_LPB03.mb.74              | 94.38  | 3.370 | 41  |
| Sample_LPB03.mb.48              | 98.65  | 0.671 | 98  |
| Sample_LPB03.mb.27              | 100.00 | 0.806 | 23  |
| Sample_LPB03.Cluster2870        | 95.70  | 0.000 | 21  |
| Sample_LPB03.mb.79              | 92.59  | 1.342 | 32  |
| Sample_LPB03.Cluster2773cbin.1  | 96.60  | 0.000 | 24  |
| Sample_LPB03.mb.60              | 93.12  | 3.796 | 262 |
| Sample_LPB03.Cluster1336        | 97.95  | 0.000 | 31  |
| Sample_LPB03.mb.28              | 98.65  | 1.738 | 115 |
| Sample_LPB03.Cluster466         | 98.66  | 2.543 | 25  |
| Sample_LPB03.mb.46              | 88.12  | 0.894 | 145 |
| Sample_LPB03.mb.75              | 91.15  | 0.357 | 134 |
| Sample_LPB03.mb.83              | 82.36  | 4.530 | 243 |
| Sample_LPB03.Cluster375         | 81.49  | 0.507 | 52  |
| Sample_LPB03.mb.82cbin.1        | 84.66  | 2.416 | 235 |
| Sample_LPB03.Cluster632         | 99.90  | 0.909 | 15  |
| Sample_LPB03.mb.93              | 96.77  | 0.000 | 42  |
| Sample_LPB03.mb.40              | 87.99  | 3.210 | 300 |
| Sample_LPB03.mb.31              | 95.35  | 2.486 | 93  |
| Sample_LPB03.mb.55cbin.1        | 96.91  | 0.335 | 49  |
| Sample_LPB03.mb.86              | 93.28  | 0.894 | 335 |
| Sample_LPB03.mb.78              | 94.23  | 1.201 | 10  |
| Sample_LPB03.mb.50              | 98.11  | 1.103 | 60  |
| Sample_LPB03.mb.45cbin.1        | 93.64  | 0.788 | 345 |
| Sample_LPB03.mb.47              | 99.25  | 0.929 | 99  |
| Sample_LPB03.Cluster4744cbin.1  | 99.38  | 0.808 | 228 |
| Sample_LPB04.Cluster13416cbin.1 | 89.88  | 4.654 | 105 |
| Sample_LPB04.Cluster2924cbin.1  | 96.43  | 0.806 | 206 |
| Sample_LPB04.mb.12              | 95.74  | 0.671 | 29  |
| Sample_LPB04.Cluster395         | 87.24  | 0.671 | 58  |
| Sample_LPB04.mb.54              | 85.59  | 1.612 | 332 |
| Sample_LPB04.mb.25              | 99.26  | 0.000 | 34  |

|                                 |        |       |     |
|---------------------------------|--------|-------|-----|
| Sample_LPB04.mb.41              | 93.06  | 0.000 | 33  |
| Sample_LPB04.Cluster591cbin.1   | 82.66  | 1.520 | 352 |
| Sample_LPB04.Cluster636         | 91.10  | 4.026 | 63  |
| Sample_LPB04.mb.60              | 99.19  | 1.075 | 49  |
| Sample_LPB04.mb.49              | 82.71  | 0.671 | 109 |
| Sample_LPB04.mb.27              | 94.29  | 0.671 | 19  |
| Sample_LPB04.Cluster6113        | 96.64  | 0.000 | 23  |
| Sample_LPB04.mb.36cbin.1        | 95.04  | 4.113 | 314 |
| Sample_LPB04.mb.56cbin.1        | 87.55  | 4.697 | 33  |
| Sample_LPB04.Cluster4480        | 93.62  | 0.000 | 8   |
| Sample_LPB04.Cluster8893        | 99.51  | 0.480 | 14  |
| Sample_LPB04.Cluster4cbin.1     | 80.73  | 1.020 | 503 |
| Sample_LPB04.mb.32cbin.1        | 98.65  | 1.006 | 19  |
| Sample_LPB04.Cluster13352       | 100.00 | 0.000 | 21  |
| Sample_LPB04.Cluster2894cbin.1  | 91.60  | 2.344 | 242 |
| Sample_LPB04.Cluster24          | 97.21  | 1.873 | 148 |
| Sample_LPB04.Cluster12970cbin.1 | 98.32  | 0.000 | 139 |
| Sample_LPB04.Cluster2445        | 97.95  | 1.360 | 34  |
| Sample_LPB04.mb.47              | 80.57  | 0.671 | 398 |
| Sample_LPB04.mb.76cbin.1        | 99.30  | 1.864 | 99  |
| Sample_LPB04.mb.33              | 93.78  | 1.522 | 152 |
| Sample_LPB04.mb.6cbin.1         | 81.65  | 0.000 | 41  |
| Sample_LPB04.mb.53              | 92.56  | 2.419 | 51  |
| Sample_LPB04.mb.61              | 92.39  | 0.625 | 104 |
| Sample_LPB04.Cluster10566       | 99.62  | 0.000 | 15  |
| Sample_LPB04.mb.29cbin.1        | 94.15  | 1.454 | 171 |
| Sample_LPB04.mb.67              | 94.44  | 2.514 | 131 |
| Sample_LPB04.Cluster7411cbin.1  | 83.06  | 0.806 | 680 |
| Sample_LPB04.mb.68              | 95.75  | 2.173 | 156 |
| Sample_LPB04.mb.69cbin.1        | 90.97  | 1.814 | 55  |
| Sample_LPB04.mb.88              | 84.35  | 3.306 | 425 |
| Sample_LPB04.mb.73              | 86.54  | 4.474 | 275 |
| Sample_LPB04.Cluster7566        | 84.87  | 1.602 | 148 |
| Sample_LPB04.mb.90              | 97.43  | 0.360 | 22  |
| Sample_LPB04.mb.64              | 98.77  | 3.541 | 36  |
| Sample_LPB04.mb.18cbin.1        | 95.31  | 1.730 | 222 |
| Sample_LPB04.mb.51cbin.1        | 83.70  | 0.314 | 81  |
| Sample_LPB04.mb.9cbin.1         | 98.65  | 0.000 | 21  |
| Sample_LPB04.mb.91cbin.1        | 98.65  | 0.000 | 45  |
| Sample_LPB04.mb.7               | 97.74  | 2.334 | 211 |
| Sample_LPB04.mb.100cbin.1       | 90.27  | 4.696 | 230 |
| Sample_LPB05.Cluster2433cbin.1  | 85.02  | 0.000 | 250 |
| Sample_LPB05.Cluster13939       | 96.72  | 0.111 | 19  |
| Sample_LPB05.Cluster4858        | 92.37  | 0.671 | 23  |
| Sample_LPB05.Cluster4851cbin.1  | 91.59  | 0.000 | 198 |
| Sample_LPB05.mb.12cbin.1        | 92.69  | 4.494 | 15  |
| Sample_LPB05.mb.112             | 96.77  | 1.075 | 63  |
| Sample_LPB05.Cluster7796cbin.1  | 95.14  | 3.006 | 265 |
| Sample_LPB05.Cluster6861        | 91.21  | 0.675 | 11  |
| Sample_LPB05.Cluster12286cbin.1 | 97.15  | 1.265 | 189 |
| Sample_LPB05.mb.3               | 96.50  | 0.000 | 93  |
| Sample_LPB05.mb.54cbin.1        | 94.89  | 0.000 | 136 |
| Sample_LPB05.mb.47              | 97.76  | 0.000 | 71  |
| Sample_LPB05.Cluster11235       | 99.32  | 0.671 | 23  |
| Sample_LPB05.mb.50              | 90.79  | 2.714 | 281 |
| Sample_LPB05.Cluster7261        | 99.98  | 1.497 | 22  |
| Sample_LPB05.mb.109cbin.1       | 87.91  | 4.853 | 236 |
| Sample_LPB05.mb.16cbin.1        | 90.60  | 3.355 | 42  |

|                                 |        |       |     |
|---------------------------------|--------|-------|-----|
| Sample_LPB05.Cluster3159        | 97.59  | 0.961 | 20  |
| Sample_LPB05.mb.100             | 88.92  | 0.000 | 130 |
| Sample_LPB05.mb.66              | 91.57  | 0.561 | 27  |
| Sample_LPB05.mb.37cbin.1        | 93.95  | 0.335 | 140 |
| Sample_LPB05.mb.17              | 95.25  | 1.265 | 101 |
| Sample_LPB05.Cluster3708cbin.1  | 98.65  | 0.000 | 24  |
| Sample_LPB05.Cluster9022        | 95.97  | 2.013 | 20  |
| Sample_LPB05.Cluster10054       | 99.32  | 0.000 | 18  |
| Sample_LPB05.Cluster4298cbin.1  | 97.95  | 0.000 | 28  |
| Sample_LPB05.mb.117             | 97.85  | 2.745 | 78  |
| Sample_LPB05.mb.119             | 94.63  | 0.671 | 69  |
| Sample_LPB05.Cluster5602        | 97.70  | 4.310 | 80  |
| Sample_LPB05.mb.29cbin.1        | 96.92  | 2.512 | 68  |
| Sample_LPB05.Cluster11890cbin.1 | 97.73  | 1.886 | 197 |
| Sample_LPB05.mb.69              | 87.24  | 0.671 | 40  |
| Sample_LPB05.mb.62              | 93.99  | 0.000 | 40  |
| Sample_LPB05.mb.26              | 97.31  | 1.342 | 67  |
| Sample_LPB05.mb.96cbin.1        | 93.06  | 0.000 | 47  |
| Sample_LPB05.mb.71              | 88.36  | 1.174 | 45  |
| Sample_LPB05.mb.65              | 88.63  | 1.209 | 134 |
| Sample_LPB05.mb.7               | 84.25  | 2.300 | 342 |
| Sample_LPB05.mb.82              | 94.29  | 0.335 | 70  |
| Sample_LPB05.mb.84              | 85.41  | 1.682 | 82  |
| Sample_LPB05.Cluster6812cbin.1  | 99.10  | 3.831 | 63  |
| Sample_LPB05.mb.75              | 98.65  | 0.671 | 52  |
| Sample_LPB05.mb.93cbin.1        | 98.40  | 2.937 | 128 |
| Sample_LPB05.mb.94              | 97.86  | 1.205 | 230 |
| Sample_LPB05.mb.64cbin.1        | 87.94  | 2.820 | 418 |
| Sample_LPB05.mb.95              | 87.12  | 4.368 | 268 |
| Sample_LPB05.mb.48cbin.1        | 99.37  | 0.314 | 95  |
| Sample_LPB08.Cluster5246cbin.1  | 97.09  | 0.671 | 62  |
| Sample_LPB08.mb.71              | 92.13  | 1.845 | 21  |
| Sample_LPB08.Cluster4938        | 95.30  | 3.579 | 141 |
| Sample_LPB08.mb.16              | 98.65  | 0.000 | 52  |
| Sample_LPB08.mb.20              | 90.31  | 2.427 | 157 |
| Sample_LPB08.mb.57              | 90.93  | 0.671 | 23  |
| Sample_LPB08.Cluster730         | 92.22  | 0.961 | 21  |
| Sample_LPB08.mb.49              | 86.62  | 3.533 | 348 |
| Sample_LPB08.Cluster4192        | 86.84  | 1.006 | 16  |
| Sample_LPB08.mb.28cbin.1        | 93.62  | 0.671 | 96  |
| Sample_LPB08.Cluster14cbin.1    | 94.49  | 1.381 | 69  |
| Sample_LPB08.mb.33              | 92.75  | 2.898 | 60  |
| Sample_LPB08.mb.67              | 93.68  | 2.242 | 152 |
| Sample_LPB08.mb.13cbin.1        | 99.98  | 1.497 | 26  |
| Sample_LPB08.mb.9cbin.1         | 89.93  | 1.342 | 34  |
| Sample_LPB08.mb.12              | 96.40  | 0.598 | 89  |
| Sample_LPB08.mb.3               | 96.15  | 0.000 | 35  |
| Sample_LPB08.mb.10cbin.1        | 88.09  | 4.219 | 145 |
| Sample_LPB08.Cluster93          | 100.00 | 1.818 | 26  |
| Sample_LPB08.Cluster6413cbin.1  | 89.60  | 0.671 | 370 |
| Sample_LPB08.mb.41cbin.1        | 80.75  | 0.000 | 43  |
| Sample_LPB08.Cluster4247        | 99.51  | 0.000 | 61  |
| Sample_LPB08.mb.6               | 93.25  | 2.399 | 518 |
| Sample_LPB08.mb.25              | 99.24  | 0.125 | 90  |
| Sample_LPB08.Cluster4577cbin.1  | 99.41  | 0.000 | 82  |
| Sample_LPB08.mb.15cbin.1        | 99.64  | 0.105 | 82  |
| Sample_LPB08.mb.36cbin.1        | 96.57  | 0.000 | 265 |
| Sample_LPB08.Cluster3074cbin.1  | 97.12  | 1.189 | 58  |



|                                 |       |       |     |
|---------------------------------|-------|-------|-----|
| Sample_LPB08.mb.60cbin.1        | 98.84 | 0.384 | 50  |
| Sample_LPB08.mb.8               | 85.24 | 1.610 | 47  |
| Sample_LPC01.Cluster3588        | 92.28 | 0.000 | 37  |
| Sample_LPC01.Cluster12          | 88.74 | 0.671 | 209 |
| Sample_LPC01.mb.111             | 98.65 | 0.000 | 38  |
| Sample_LPC01.Cluster2751        | 97.67 | 0.632 | 36  |
| Sample_LPC01.mb.112             | 97.79 | 0.000 | 31  |
| Sample_LPC01.mb.119             | 97.48 | 0.000 | 102 |
| Sample_LPC01.mb.116             | 86.60 | 1.510 | 208 |
| Sample_LPC01.Cluster1033cbin.1  | 91.82 | 0.961 | 23  |
| Sample_LPC01.mb.68              | 80.71 | 0.892 | 88  |
| Sample_LPC01.mb.30cbin.1        | 86.93 | 1.235 | 368 |
| Sample_LPC01.mb.2cbin.1         | 94.63 | 4.697 | 51  |
| Sample_LPC01.Cluster396cbin.1   | 87.27 | 0.850 | 191 |
| Sample_LPC01.Cluster1744        | 97.27 | 0.671 | 25  |
| Sample_LPC01.mb.109cbin.1       | 95.56 | 0.021 | 68  |
| Sample_LPC01.Cluster11550cbin.1 | 90.83 | 0.167 | 186 |
| Sample_LPC01.Cluster5424        | 96.57 | 0.000 | 23  |
| Sample_LPC01.mb.28cbin.1        | 95.56 | 2.215 | 121 |
| Sample_LPC01.mb.124cbin.1       | 95.06 | 2.721 | 237 |
| Sample_LPC01.Cluster6136        | 95.97 | 3.140 | 69  |
| Sample_LPC01.mb.105cbin.1       | 94.15 | 0.966 | 42  |
| Sample_LPC01.mb.90              | 91.27 | 1.342 | 53  |
| Sample_LPC01.Cluster10977cbin.1 | 99.36 | 1.265 | 116 |
| Sample_LPC01.mb.118             | 97.86 | 0.020 | 28  |
| Sample_LPC01.mb.96              | 98.43 | 1.342 | 63  |
| Sample_LPC01.mb.110cbin.1       | 88.67 | 0.105 | 214 |
| Sample_LPC01.mb.61              | 94.30 | 2.061 | 155 |
| Sample_LPC01.mb.45              | 89.93 | 0.000 | 31  |
| Sample_LPC01.mb.41              | 97.55 | 1.774 | 72  |
| Sample_LPC01.mb.76cbin.1        | 94.71 | 2.830 | 262 |
| Sample_LPC01.mb.89cbin.1        | 92.61 | 0.335 | 69  |
| Sample_LPC01.mb.91              | 89.30 | 3.381 | 169 |
| Sample_LPC01.mb.128cbin.1       | 93.15 | 2.611 | 82  |
| Sample_LPC01.mb.67cbin.1        | 86.21 | 1.143 | 396 |
| Sample_LPC01.mb.34cbin.1        | 96.80 | 0.557 | 94  |
| Sample_LPC01.mb.27cbin.1        | 97.56 | 0.769 | 100 |
| Sample_LPC02.Cluster15787       | 90.66 | 0.000 | 29  |
| Sample_LPC02.Cluster15690       | 98.66 | 0.111 | 9   |
| Sample_LPC02.Cluster14689       | 98.65 | 0.671 | 11  |
| Sample_LPC02.Cluster9279cbin.1  | 96.73 | 2.483 | 130 |
| Sample_LPC02.Cluster130cbin.1   | 93.45 | 1.610 | 59  |
| Sample_LPC02.mb.123             | 91.58 | 1.342 | 35  |
| Sample_LPC02.Cluster3115        | 98.32 | 0.671 | 27  |
| Sample_LPC02.Cluster3628        | 93.28 | 0.000 | 10  |
| Sample_LPC02.Cluster8220cbin.1  | 91.94 | 1.006 | 29  |
| Sample_LPC02.mb.24              | 92.74 | 0.342 | 96  |
| Sample_LPC02.Cluster3411cbin.1  | 93.04 | 0.186 | 238 |
| Sample_LPC02.Cluster4862        | 97.27 | 0.335 | 20  |
| Sample_LPC02.Cluster12100       | 98.65 | 0.000 | 28  |
| Sample_LPC02.Cluster2482        | 97.95 | 0.680 | 23  |
| Sample_LPC02.mb.52              | 89.32 | 0.000 | 30  |
| Sample_LPC02.Cluster596cbin.1   | 86.80 | 2.534 | 211 |
| Sample_LPC02.mb.122             | 96.76 | 1.481 | 52  |
| Sample_LPC02.mb.23              | 90.93 | 0.671 | 59  |
| Sample_LPC02.Cluster9367cbin.1  | 94.40 | 0.000 | 27  |
| Sample_LPC02.mb.17              | 92.11 | 0.335 | 66  |
| Sample_LPC02.mb.47              | 87.01 | 1.923 | 305 |

|                                 |        |       |     |
|---------------------------------|--------|-------|-----|
| Sample_LPC02.mb.21              | 85.52  | 3.355 | 231 |
| Sample_LPC02.mb.12              | 100.00 | 0.000 | 15  |
| Sample_LPC02.mb.125             | 99.19  | 0.961 | 26  |
| Sample_LPC02.mb.109             | 96.42  | 0.671 | 86  |
| Sample_LPC02.mb.15              | 89.26  | 0.335 | 34  |
| Sample_LPC02.mb.76              | 86.34  | 0.335 | 251 |
| Sample_LPC02.mb.70cbin.1        | 92.17  | 0.000 | 30  |
| Sample_LPC02.mb.60              | 95.07  | 0.901 | 172 |
| Sample_LPC02.Cluster5884        | 92.23  | 0.000 | 86  |
| Sample_LPC02.mb.69cbin.1        | 89.76  | 1.898 | 129 |
| Sample_LPC02.mb.127             | 93.34  | 1.091 | 257 |
| Sample_LPC02.mb.80cbin.1        | 94.74  | 2.013 | 112 |
| Sample_LPC02.mb.7cbin.1         | 91.61  | 2.908 | 148 |
| Sample_LPC02.mb.58              | 89.66  | 2.708 | 121 |
| Sample_LPC02.Cluster8316        | 95.00  | 1.282 | 52  |
| Sample_LPC02.mb.87              | 100.00 | 0.480 | 33  |
| Sample_LPC02.mb.90cbin.1        | 99.11  | 0.360 | 43  |
| Sample_LPC02.mb.51              | 96.02  | 0.000 | 122 |
| Sample_LPC02.mb.79              | 97.75  | 2.641 | 193 |
| Sample_LPC02.mb.99              | 96.43  | 0.512 | 54  |
| Sample_LPC03.Cluster13638       | 98.65  | 0.000 | 8   |
| Sample_LPC03.Cluster353cbin.1   | 96.50  | 1.515 | 88  |
| Sample_LPC03.Cluster11360cbin.1 | 95.30  | 0.671 | 29  |
| Sample_LPC03.mb.122             | 97.94  | 0.000 | 58  |
| Sample_LPC03.Cluster8563        | 85.45  | 0.671 | 10  |
| Sample_LPC03.Cluster8725        | 92.17  | 0.671 | 21  |
| Sample_LPC03.Cluster12660cbin.1 | 98.65  | 3.020 | 149 |
| Sample_LPC03.Cluster211cbin.1   | 87.24  | 1.342 | 115 |
| Sample_LPC03.Cluster213cbin.1   | 84.33  | 2.404 | 91  |
| Sample_LPC03.Cluster1592cbin.1  | 93.59  | 4.219 | 146 |
| Sample_LPC03.Cluster1220cbin.1  | 89.05  | 4.026 | 107 |
| Sample_LPC03.mb.128cbin.1       | 84.61  | 0.335 | 44  |
| Sample_LPC03.mb.3               | 97.84  | 0.000 | 44  |
| Sample_LPC03.mb.35              | 100.00 | 0.111 | 42  |
| Sample_LPC03.Cluster9996cbin.1  | 80.99  | 3.511 | 530 |
| Sample_LPC03.mb.29cbin.1        | 86.26  | 2.348 | 206 |
| Sample_LPC03.Cluster5010cbin.1  | 99.03  | 1.442 | 14  |
| Sample_LPC03.Cluster2175        | 97.95  | 0.680 | 23  |
| Sample_LPC03.mb.94              | 80.34  | 0.000 | 140 |
| Sample_LPC03.Cluster1576cbin.1  | 98.93  | 0.000 | 54  |
| Sample_LPC03.mb.33cbin.1        | 83.06  | 0.335 | 178 |
| Sample_LPC03.mb.19              | 95.96  | 0.953 | 173 |
| Sample_LPC03.mb.124             | 97.31  | 0.000 | 14  |
| Sample_LPC03.mb.111cbin.1       | 85.23  | 2.684 | 38  |
| Sample_LPC03.Cluster11cbin.1    | 86.70  | 0.698 | 465 |
| Sample_LPC03.mb.40              | 90.60  | 0.671 | 148 |
| Sample_LPC03.Cluster653         | 88.54  | 1.439 | 14  |
| Sample_LPC03.mb.108             | 96.28  | 0.240 | 57  |
| Sample_LPC03.mb.51cbin.1        | 81.02  | 1.510 | 121 |
| Sample_LPC03.Cluster4989cbin.1  | 94.25  | 0.675 | 44  |
| Sample_LPC03.mb.56              | 92.36  | 4.642 | 373 |
| Sample_LPC03.mb.126             | 97.98  | 1.342 | 20  |
| Sample_LPC03.mb.117cbin.1       | 98.86  | 0.377 | 34  |
| Sample_LPC03.mb.50cbin.1        | 97.31  | 1.342 | 90  |
| Sample_LPC03.mb.28              | 86.23  | 2.093 | 47  |
| Sample_LPC03.mb.24cbin.1        | 84.15  | 0.880 | 56  |
| Sample_LPC03.mb.9cbin.1         | 96.42  | 1.342 | 67  |
| Sample_LPC03.mb.71              | 95.19  | 1.923 | 41  |

|                                 |        |       |     |
|---------------------------------|--------|-------|-----|
| Sample_LPC03.mb.90cbin.1        | 90.22  | 1.425 | 193 |
| Sample_LPC03.mb.86cbin.1        | 94.25  | 0.000 | 62  |
| Sample_LPC03.mb.11              | 91.03  | 3.738 | 173 |
| Sample_LPC03.mb.77              | 83.54  | 1.243 | 100 |
| Sample_LPC04.Cluster12914       | 91.33  | 0.111 | 145 |
| Sample_LPC04.Cluster148         | 85.86  | 1.612 | 24  |
| Sample_LPC04.Cluster8345        | 94.38  | 1.398 | 4   |
| Sample_LPC04.Cluster6011cbin.1  | 92.93  | 2.237 | 24  |
| Sample_LPC04.mb.111             | 89.51  | 0.000 | 61  |
| Sample_LPC04.mb.26              | 90.96  | 1.565 | 230 |
| Sample_LPC04.mb.12              | 89.70  | 0.000 | 29  |
| Sample_LPC04.mb.101cbin.1       | 86.45  | 1.526 | 133 |
| Sample_LPC04.mb.106             | 90.51  | 1.236 | 60  |
| Sample_LPC04.mb.30              | 96.90  | 1.209 | 355 |
| Sample_LPC04.mb.104             | 88.99  | 2.074 | 176 |
| Sample_LPC04.Cluster1226cbin.1  | 89.26  | 0.838 | 90  |
| Sample_LPC04.mb.57              | 91.29  | 1.123 | 36  |
| Sample_LPC04.mb.67              | 94.94  | 2.407 | 21  |
| Sample_LPC04.Cluster6453        | 91.96  | 0.898 | 75  |
| Sample_LPC04.mb.70              | 90.44  | 2.247 | 31  |
| Sample_LPC04.mb.22              | 97.58  | 0.806 | 61  |
| Sample_LPC04.mb.51cbin.1        | 93.88  | 0.699 | 54  |
| Sample_LPC04.Cluster1402cbin.1  | 100.00 | 0.000 | 38  |
| Sample_LPC04.Cluster10775       | 98.65  | 1.006 | 20  |
| Sample_LPC04.mb.47              | 85.32  | 4.215 | 279 |
| Sample_LPC04.Cluster12998       | 100.00 | 0.000 | 22  |
| Sample_LPC04.mb.55              | 97.79  | 0.000 | 60  |
| Sample_LPC04.mb.43cbin.1        | 87.24  | 2.768 | 95  |
| Sample_LPC04.Cluster10936cbin.1 | 99.32  | 0.000 | 20  |
| Sample_LPC04.Cluster554cbin.1   | 96.94  | 2.071 | 243 |
| Sample_LPC04.mb.6               | 94.59  | 1.342 | 169 |
| Sample_LPC04.mb.5               | 93.59  | 0.671 | 199 |
| Sample_LPC04.Cluster2788        | 97.95  | 1.360 | 34  |
| Sample_LPC04.mb.65cbin.1        | 96.42  | 0.335 | 106 |
| Sample_LPC04.mb.20              | 93.73  | 0.671 | 227 |
| Sample_LPC04.mb.58              | 86.57  | 0.671 | 40  |
| Sample_LPC04.mb.85              | 97.58  | 1.075 | 45  |
| Sample_LPC04.mb.32              | 98.63  | 1.677 | 37  |
| Sample_LPC04.mb.89              | 81.45  | 0.806 | 43  |
| Sample_LPC04.mb.40              | 90.86  | 1.006 | 265 |
| Sample_LPC04.mb.19cbin.1        | 95.30  | 0.000 | 38  |
| Sample_LPC04.mb.99              | 90.45  | 0.000 | 224 |
| Sample_LPC04.mb.90              | 96.40  | 0.268 | 79  |
| Sample_LPC04.Cluster1843cbin.1  | 98.79  | 0.507 | 40  |
| Sample_LPC04.mb.74              | 93.71  | 2.702 | 134 |
| Sample_LPC04.mb.8               | 81.18  | 4.250 | 150 |
| Sample_LPC04.Cluster6674cbin.1  | 91.95  | 1.075 | 482 |
| Sample_LPC04.mb.95              | 95.97  | 0.671 | 25  |
| Sample_LPC04.Cluster9196        | 99.24  | 0.000 | 25  |
| Sample_LPC04.mb.91cbin.1        | 94.25  | 3.624 | 43  |
| Sample_LPC04.mb.105             | 91.40  | 0.833 | 327 |
| Sample_LPC04.mb.80cbin.1        | 99.10  | 0.335 | 35  |
| Sample_LPC04.mb.87              | 95.75  | 0.496 | 59  |
| Sample_LPC04.mb.28cbin.1        | 93.46  | 0.576 | 199 |
| Sample_LPC04.mb.69              | 95.90  | 0.000 | 105 |
| Sample_LPC04.mb.54              | 95.70  | 1.774 | 115 |
| Sample_LPC05.Cluster7047        | 97.31  | 0.000 | 23  |
| Sample_LPC05.mb.119cbin.1       | 88.41  | 3.137 | 188 |

|                                 |        |       |     |
|---------------------------------|--------|-------|-----|
| Sample_LPC05.mb.14cbin.1        | 99.32  | 1.342 | 72  |
| Sample_LPC05.Cluster11595cbin.1 | 96.73  | 0.724 | 29  |
| Sample_LPC05.Cluster12425       | 95.97  | 0.335 | 38  |
| Sample_LPC05.Cluster11892cbin.1 | 99.98  | 2.095 | 22  |
| Sample_LPC05.mb.16cbin.1        | 99.77  | 0.671 | 64  |
| Sample_LPC05.Cluster10737       | 95.30  | 0.000 | 22  |
| Sample_LPC05.Cluster8509        | 95.97  | 0.244 | 19  |
| Sample_LPC05.Cluster141cbin.1   | 97.73  | 2.348 | 143 |
| Sample_LPC05.mb.69cbin.1        | 97.84  | 0.000 | 54  |
| Sample_LPC05.mb.102             | 96.63  | 0.961 | 35  |
| Sample_LPC05.Cluster9730        | 87.32  | 0.025 | 81  |
| Sample_LPC05.mb.100             | 96.64  | 0.335 | 17  |
| Sample_LPC05.Cluster12574cbin.1 | 94.63  | 0.000 | 43  |
| Sample_LPC05.Cluster9183        | 97.76  | 0.000 | 26  |
| Sample_LPC05.mb.113cbin.1       | 98.55  | 1.682 | 92  |
| Sample_LPC05.mb.24              | 94.21  | 0.680 | 192 |
| Sample_LPC05.Cluster12851cbin.1 | 97.73  | 0.000 | 90  |
| Sample_LPC05.Cluster7412cbin.1  | 96.83  | 3.164 | 80  |
| Sample_LPC05.mb.117             | 87.14  | 1.342 | 279 |
| Sample_LPC05.Cluster13262cbin.1 | 87.26  | 2.777 | 637 |
| Sample_LPC05.mb.27cbin.1        | 93.28  | 1.342 | 67  |
| Sample_LPC05.mb.52              | 88.88  | 3.716 | 316 |
| Sample_LPC05.mb.2               | 91.36  | 2.223 | 243 |
| Sample_LPC05.Cluster4101cbin.1  | 88.16  | 3.810 | 130 |
| Sample_LPC05.Cluster726cbin.1   | 100.00 | 0.000 | 140 |
| Sample_LPC05.mb.76cbin.1        | 85.51  | 0.000 | 43  |
| Sample_LPC05.mb.49              | 93.22  | 4.459 | 173 |
| Sample_LPC05.mb.95cbin.1        | 93.73  | 2.348 | 40  |
| Sample_LPC05.mb.85              | 87.97  | 1.985 | 366 |
| Sample_LPC05.mb.112             | 96.98  | 0.000 | 91  |
| Sample_LPC05.mb.78              | 85.11  | 2.168 | 90  |
| Sample_LPC05.mb.20              | 91.94  | 0.700 | 85  |
| Sample_LPC05.Cluster10950cbin.1 | 95.84  | 2.391 | 227 |
| Sample_LPC05.mb.25cbin.1        | 97.76  | 0.371 | 107 |
| Sample_LPC08.mb.20cbin.1        | 81.89  | 0.000 | 243 |
| Sample_LPC08.mb.5               | 92.13  | 1.845 | 20  |
| Sample_LPC08.mb.17              | 94.50  | 0.000 | 187 |
| Sample_LPC08.mb.54cbin.1        | 95.74  | 0.671 | 63  |
| Sample_LPC08.mb.13              | 87.58  | 0.000 | 21  |
| Sample_LPC08.mb.55cbin.1        | 98.65  | 2.013 | 111 |
| Sample_LPC08.mb.15              | 92.51  | 1.549 | 95  |
| Sample_LPC08.mb.41cbin.1        | 92.46  | 0.480 | 20  |
| Sample_LPC08.mb.10              | 99.51  | 1.449 | 75  |
| Sample_LPC08.Cluster2113cbin.1  | 99.98  | 1.497 | 25  |
| Sample_LPC08.Cluster5547        | 84.69  | 1.094 | 257 |
| Sample_LPC08.Cluster147cbin.1   | 97.00  | 0.149 | 199 |
| Sample_LPC08.Cluster4552cbin.1  | 99.32  | 1.006 | 17  |
| Sample_LPC08.mb.26              | 98.11  | 0.000 | 106 |
| Sample_LPC08.Cluster227         | 98.63  | 0.000 | 19  |
| Sample_LPC08.mb.31cbin.1        | 98.07  | 0.000 | 36  |
| Sample_LPC08.mb.42              | 90.92  | 1.183 | 570 |
| Sample_LPC08.mb.44cbin.1        | 88.49  | 0.000 | 38  |
| Sample_LPC08.Cluster4945cbin.1  | 99.51  | 0.483 | 93  |
| Sample_LPC08.Cluster5239cbin.1  | 87.14  | 0.806 | 520 |
| Sample_LPC08.mb.1cbin.1         | 98.49  | 0.514 | 173 |
| Sample_LPC08.mb.33cbin.1        | 98.50  | 1.265 | 236 |
| Sample_LPC08.mb.49              | 94.93  | 0.584 | 64  |
| Sample_LPC08.Cluster2875cbin.1  | 96.83  | 2.998 | 48  |

|                                 |        |       |     |
|---------------------------------|--------|-------|-----|
| Sample_LPC08.Cluster1848cbin.1  | 98.84  | 0.000 | 53  |
| Sample_SCA55.Cluster12046       | 91.11  | 0.111 | 122 |
| Sample_SCA55.mb.104cbin.1       | 82.52  | 3.225 | 119 |
| Sample_SCA55.Cluster2874        | 90.61  | 0.000 | 29  |
| Sample_SCA55.Cluster7572cbin.1  | 94.91  | 0.223 | 196 |
| Sample_SCA55.Cluster4326cbin.1  | 87.05  | 0.000 | 49  |
| Sample_SCA55.Cluster3804cbin.1  | 95.67  | 2.215 | 249 |
| Sample_SCA55.Cluster3130cbin.1  | 94.60  | 2.142 | 50  |
| Sample_SCA55.Cluster2493        | 96.97  | 0.000 | 11  |
| Sample_SCA55.mb.44              | 97.60  | 0.000 | 15  |
| Sample_SCA55.Cluster10485       | 98.50  | 1.042 | 107 |
| Sample_SCA55.mb.27              | 84.88  | 1.698 | 271 |
| Sample_SCA55.mb.23              | 84.00  | 0.000 | 39  |
| Sample_SCA55.Cluster11573cbin.1 | 98.79  | 0.294 | 52  |
| Sample_SCA55.Cluster6699        | 97.09  | 0.000 | 38  |
| Sample_SCA55.Cluster790         | 99.43  | 0.077 | 21  |
| Sample_SCA55.Cluster12012       | 90.64  | 0.000 | 21  |
| Sample_SCA55.mb.7cbin.1         | 93.95  | 0.000 | 22  |
| Sample_SCA55.mb.4cbin.1         | 93.70  | 0.000 | 71  |
| Sample_SCA55.Cluster8267        | 98.95  | 0.483 | 61  |
| Sample_SCA55.mb.52cbin.1        | 96.77  | 2.419 | 78  |
| Sample_SCA55.mb.97              | 89.74  | 0.854 | 7   |
| Sample_SCA55.mb.38              | 88.18  | 3.140 | 157 |
| Sample_SCA55.mb.21cbin.1        | 85.14  | 1.911 | 311 |
| Sample_SCA55.mb.85              | 86.53  | 0.671 | 104 |
| Sample_SCA55.mb.45cbin.1        | 98.63  | 4.026 | 37  |
| Sample_SCA55.mb.60              | 91.89  | 2.721 | 89  |
| Sample_SCA55.mb.87              | 98.65  | 0.335 | 48  |
| Sample_SCA55.mb.110cbin.1       | 98.06  | 3.582 | 179 |
| Sample_SCA55.mb.95              | 95.10  | 2.040 | 112 |
| Sample_SCA55.mb.99cbin.1        | 96.41  | 2.098 | 44  |
| Sample_SCA58.Cluster16595       | 87.35  | 1.123 | 165 |
| Sample_SCA58.Cluster16706cbin.1 | 94.94  | 2.407 | 29  |
| Sample_SCA58.Cluster1102        | 88.70  | 1.075 | 39  |
| Sample_SCA58.Cluster4228cbin.1  | 95.39  | 1.342 | 64  |
| Sample_SCA58.mb.102             | 87.13  | 0.000 | 38  |
| Sample_SCA58.Cluster4693        | 100.00 | 0.115 | 8   |
| Sample_SCA58.Cluster15781       | 91.04  | 1.841 | 107 |
| Sample_SCA58.mb.118cbin.1       | 92.26  | 4.026 | 47  |
| Sample_SCA58.Cluster605         | 91.94  | 1.649 | 72  |
| Sample_SCA58.mb.25cbin.1        | 92.33  | 0.806 | 12  |
| Sample_SCA58.Cluster1069cbin.1  | 86.25  | 2.494 | 341 |
| Sample_SCA58.Cluster6503cbin.1  | 95.07  | 0.000 | 64  |
| Sample_SCA58.mb.121             | 84.66  | 4.697 | 140 |
| Sample_SCA58.Cluster13327       | 99.32  | 1.006 | 19  |
| Sample_SCA58.Cluster10143       | 87.56  | 2.013 | 23  |
| Sample_SCA58.Cluster1691        | 97.95  | 0.000 | 27  |
| Sample_SCA58.mb.20              | 80.16  | 2.593 | 261 |
| Sample_SCA58.Cluster10382cbin.1 | 97.31  | 0.000 | 68  |
| Sample_SCA58.mb.5               | 95.96  | 1.148 | 169 |
| Sample_SCA58.Cluster864         | 96.25  | 0.000 | 146 |
| Sample_SCA58.mb.129cbin.1       | 85.85  | 1.363 | 63  |
| Sample_SCA58.mb.31cbin.1        | 81.60  | 2.430 | 368 |
| Sample_SCA58.mb.35              | 99.30  | 1.515 | 93  |
| Sample_SCA58.mb.4cbin.1         | 88.81  | 0.000 | 64  |
| Sample_SCA58.mb.107             | 96.63  | 0.961 | 40  |
| Sample_SCA58.mb.80              | 92.41  | 2.247 | 29  |

|                                 |        |       |     |
|---------------------------------|--------|-------|-----|
| Sample_SCA58.mb.43              | 81.06  | 1.149 | 87  |
| Sample_SCA58.mb.15cbin.1        | 90.86  | 1.442 | 33  |
| Sample_SCA58.mb.120cbin.1       | 96.60  | 0.671 | 29  |
| Sample_SCA58.mb.46              | 91.61  | 1.006 | 272 |
| Sample_SCA58.Cluster11257       | 97.73  | 0.000 | 21  |
| Sample_SCA58.mb.103             | 91.88  | 0.480 | 23  |
| Sample_SCA58.mb.77              | 100.00 | 0.000 | 56  |
| Sample_SCA58.mb.27              | 90.02  | 2.040 | 185 |
| Sample_SCA58.mb.63cbin.1        | 91.27  | 4.194 | 48  |
| Sample_SCA58.mb.51              | 81.17  | 1.490 | 405 |
| Sample_SCA58.Cluster8627cbin.1  | 97.21  | 1.612 | 276 |
| Sample_SCA58.mb.123             | 96.29  | 0.487 | 162 |
| Sample_SCA58.mb.55cbin.1        | 99.19  | 3.225 | 145 |
| Sample_SCA58.Cluster8567        | 89.23  | 0.897 | 39  |
| Sample_SCA58.Cluster8833        | 98.84  | 0.000 | 50  |
| Sample_SCA58.mb.91cbin.1        | 92.56  | 2.348 | 156 |
| Sample_SCA58.mb.56cbin.1        | 100.00 | 2.176 | 47  |
| Sample_SCA58.mb.117cbin.1       | 85.08  | 4.584 | 424 |
| Sample_SCA58.mb.86              | 98.07  | 0.961 | 21  |
| Sample_SCA58.mb.38              | 88.97  | 2.230 | 146 |
| Sample_SCA58.Cluster8815        | 93.69  | 4.902 | 152 |
| Sample_SCA58.mb.135             | 98.09  | 0.870 | 123 |
| Sample_SCA59.Cluster5865cbin.1  | 88.23  | 1.342 | 28  |
| Sample_SCA59.Cluster17127       | 97.60  | 0.800 | 41  |
| Sample_SCA59.mb.106             | 81.17  | 2.247 | 17  |
| Sample_SCA59.mb.124             | 91.57  | 1.284 | 32  |
| Sample_SCA59.Cluster179         | 98.32  | 1.342 | 35  |
| Sample_SCA59.Cluster9717        | 99.19  | 0.115 | 16  |
| Sample_SCA59.Cluster17197cbin.1 | 100.00 | 0.000 | 21  |
| Sample_SCA59.Cluster10905       | 95.30  | 0.000 | 20  |
| Sample_SCA59.Cluster12937cbin.1 | 99.32  | 0.671 | 25  |
| Sample_SCA59.Cluster4667cbin.1  | 93.82  | 0.021 | 79  |
| Sample_SCA59.Cluster12108       | 92.49  | 0.523 | 204 |
| Sample_SCA59.Cluster3650cbin.1  | 97.27  | 0.671 | 29  |
| Sample_SCA59.Cluster3610cbin.1  | 81.66  | 0.200 | 194 |
| Sample_SCA59.Cluster227         | 95.91  | 0.340 | 218 |
| Sample_SCA59.mb.120cbin.1       | 82.36  | 4.570 | 212 |
| Sample_SCA59.mb.133cbin.1       | 91.94  | 3.020 | 32  |
| Sample_SCA59.mb.26              | 99.19  | 1.612 | 41  |
| Sample_SCA59.mb.15              | 96.64  | 1.342 | 61  |
| Sample_SCA59.Cluster9650cbin.1  | 89.93  | 0.671 | 86  |
| Sample_SCA59.Cluster6328cbin.1  | 93.54  | 3.810 | 342 |
| Sample_SCA59.mb.50              | 99.19  | 2.284 | 135 |
| Sample_SCA59.mb.102             | 97.31  | 0.000 | 103 |
| Sample_SCA59.mb.24              | 84.61  | 0.000 | 196 |
| Sample_SCA59.mb.30cbin.1        | 98.65  | 3.803 | 166 |
| Sample_SCA59.mb.121             | 91.54  | 1.759 | 31  |
| Sample_SCA59.mb.18              | 96.95  | 0.256 | 85  |
| Sample_SCA59.mb.65              | 98.38  | 1.075 | 96  |
| Sample_SCA59.mb.117cbin.1       | 95.62  | 0.681 | 196 |
| Sample_SCA59.mb.51              | 85.33  | 0.671 | 48  |
| Sample_SCA59.mb.48cbin.1        | 91.35  | 1.565 | 123 |
| Sample_SCA59.mb.115             | 94.75  | 4.093 | 175 |
| Sample_SCA59.mb.46              | 92.19  | 0.126 | 196 |
| Sample_SCA59.Cluster7336        | 97.31  | 1.075 | 93  |
| Sample_SCA59.mb.126             | 91.13  | 1.754 | 106 |
| Sample_SCA59.mb.81              | 84.09  | 3.691 | 108 |
| Sample_SCA59.mb.36              | 98.65  | 1.677 | 23  |

|                                 |        |       |     |
|---------------------------------|--------|-------|-----|
| Sample_SCA59.mb.130             | 100.00 | 0.000 | 74  |
| Sample_SCA59.Cluster8336        | 99.23  | 0.384 | 48  |
| Sample_SCA59.Cluster5138cbin.1  | 97.55  | 0.987 | 400 |
| Sample_SCA59.mb.69cbin.1        | 93.43  | 3.629 | 322 |
| Sample_SCA59.mb.52              | 95.30  | 1.342 | 169 |
| Sample_SCA59.mb.88              | 89.42  | 0.961 | 75  |
| Sample_SCA59.mb.86              | 100.00 | 0.000 | 8   |
| Sample_SCA59.mb.59cbin.1        | 90.91  | 0.788 | 461 |
| Sample_SCA59.mb.90cbin.1        | 91.78  | 0.929 | 283 |
| Sample_SCA60.Cluster15187       | 93.82  | 0.000 | 179 |
| Sample_SCA60.mb.102             | 95.30  | 0.671 | 48  |
| Sample_SCA60.mb.17cbin.1        | 95.80  | 1.864 | 87  |
| Sample_SCA60.mb.3               | 84.89  | 0.671 | 90  |
| Sample_SCA60.Cluster9736cbin.1  | 98.43  | 0.671 | 67  |
| Sample_SCA60.Cluster5985cbin.1  | 98.31  | 1.265 | 56  |
| Sample_SCA60.Cluster2624cbin.1  | 96.63  | 1.923 | 29  |
| Sample_SCA60.Cluster131         | 93.62  | 1.342 | 115 |
| Sample_SCA60.Cluster874         | 100.00 | 0.806 | 20  |
| Sample_SCA60.Cluster2331cbin.1  | 98.10  | 0.000 | 79  |
| Sample_SCA60.mb.22              | 97.98  | 1.677 | 98  |
| Sample_SCA60.Cluster560cbin.1   | 98.39  | 2.210 | 222 |
| Sample_SCA60.Cluster7540cbin.1  | 80.95  | 2.534 | 343 |
| Sample_SCA60.Cluster2720        | 97.95  | 0.000 | 23  |
| Sample_SCA60.Cluster11954cbin.1 | 97.31  | 1.006 | 35  |
| Sample_SCA60.mb.84              | 94.94  | 3.531 | 38  |
| Sample_SCA60.mb.24              | 91.75  | 2.531 | 347 |
| Sample_SCA60.Cluster11269cbin.1 | 82.35  | 2.237 | 433 |
| Sample_SCA60.Cluster9931        | 95.97  | 0.000 | 25  |
| Sample_SCA60.mb.25              | 95.19  | 0.480 | 49  |
| Sample_SCA60.mb.13cbin.1        | 95.97  | 0.000 | 48  |
| Sample_SCA60.mb.52cbin.1        | 80.98  | 2.049 | 347 |
| Sample_SCA60.mb.104cbin.1       | 94.23  | 0.961 | 112 |
| Sample_SCA60.Cluster10224cbin.1 | 99.51  | 2.495 | 63  |
| Sample_SCA60.mb.18              | 97.31  | 0.000 | 20  |
| Sample_SCA60.mb.81cbin.1        | 84.61  | 0.854 | 36  |
| Sample_SCA60.mb.96cbin.1        | 91.93  | 1.981 | 91  |
| Sample_SCA60.mb.86              | 92.38  | 0.671 | 235 |
| Sample_SCA60.Cluster10911       | 92.98  | 1.265 | 97  |
| Sample_SCA60.mb.67cbin.1        | 93.91  | 2.364 | 76  |
| Sample_SCA60.mb.77              | 95.30  | 0.671 | 90  |
| Sample_SCA60.Cluster5689cbin.1  | 90.24  | 2.416 | 78  |
| Sample_SCA60.mb.87              | 85.90  | 4.362 | 102 |
| Sample_SCA60.mb.91              | 95.04  | 0.675 | 71  |
| Sample_SCA60.mb.83cbin.1        | 81.66  | 3.020 | 95  |
| Sample_SCA60.mb.2cbin.1         | 98.86  | 0.651 | 31  |
| Sample_SCA60.mb.9cbin.1         | 95.97  | 1.342 | 54  |
| Sample_SCA60.mb.57cbin.1        | 97.98  | 0.000 | 86  |
| Sample_SCA60.Cluster3577cbin.1  | 88.74  | 2.317 | 558 |
| Sample_SCA60.mb.90cbin.1        | 93.63  | 3.045 | 92  |
| Sample_SCA60.mb.1               | 88.19  | 2.255 | 182 |
| Sample_SCA60.mb.48cbin.1        | 98.92  | 0.537 | 153 |
| Sample_SCA60.mb.92cbin.1        | 95.23  | 2.177 | 115 |
| Sample_SCA60.Cluster205cbin.1   | 96.31  | 0.725 | 274 |
| Sample_SCA61.mb.12              | 96.77  | 1.075 | 94  |
| Sample_SCA61.mb.105             | 95.80  | 1.165 | 86  |
| Sample_SCA61.mb.25              | 93.40  | 2.572 | 254 |
| Sample_SCA61.Cluster3845cbin.1  | 80.19  | 0.000 | 31  |
| Sample_SCA61.mb.2               | 81.29  | 0.134 | 33  |

|                                |        |       |     |
|--------------------------------|--------|-------|-----|
| Sample_SCA61.mb.27             | 94.07  | 1.118 | 63  |
| Sample_SCA61.Cluster430        | 99.51  | 0.016 | 32  |
| Sample_SCA61.mb.26             | 98.65  | 0.000 | 52  |
| Sample_SCA61.Cluster6157cbin.1 | 99.32  | 0.671 | 17  |
| Sample_SCA61.Cluster26cbin.1   | 82.60  | 4.657 | 298 |
| Sample_SCA61.Cluster7291cbin.1 | 97.98  | 0.000 | 20  |
| Sample_SCA61.mb.47             | 91.94  | 3.355 | 106 |
| Sample_SCA61.Cluster572        | 96.87  | 0.000 | 34  |
| Sample_SCA61.Cluster8403cbin.1 | 97.53  | 0.000 | 82  |
| Sample_SCA61.Cluster6202cbin.1 | 90.71  | 1.572 | 303 |
| Sample_SCA61.Cluster4540       | 90.89  | 1.222 | 231 |
| Sample_SCA61.mb.16             | 97.46  | 0.000 | 175 |
| Sample_SCA61.mb.52cbin.1       | 91.94  | 0.000 | 28  |
| Sample_SCA61.mb.73             | 89.70  | 2.013 | 118 |
| Sample_SCA61.mb.23cbin.1       | 97.80  | 0.000 | 21  |
| Sample_SCA61.mb.48             | 82.77  | 1.369 | 271 |
| Sample_SCA61.Cluster3533cbin.1 | 94.07  | 0.555 | 463 |
| Sample_SCA61.mb.63             | 97.95  | 0.000 | 20  |
| Sample_SCA61.mb.95cbin.1       | 91.35  | 2.531 | 45  |
| Sample_SCA61.mb.66cbin.1       | 92.14  | 0.000 | 24  |
| Sample_SCA61.mb.80cbin.1       | 100.00 | 0.480 | 31  |
| Sample_SCA61.Cluster3102cbin.1 | 91.15  | 2.168 | 63  |
| Sample_SCA61.Cluster3246       | 97.88  | 0.576 | 60  |
| Sample_SCA61.Cluster5366cbin.1 | 94.99  | 0.616 | 382 |
| Sample_SCA61.Cluster3521cbin.1 | 95.64  | 0.743 | 43  |
| Sample_SCA61.mb.96cbin.1       | 92.17  | 0.480 | 141 |
| Sample_SCA64.Cluster2709       | 81.52  | 0.671 | 30  |
| Sample_SCA64.Cluster428cbin.1  | 94.68  | 1.515 | 77  |
| Sample_SCA64.mb.101            | 88.24  | 0.000 | 157 |
| Sample_SCA64.mb.68cbin.1       | 96.55  | 3.605 | 113 |
| Sample_SCA64.Cluster4036       | 98.99  | 0.000 | 40  |
| Sample_SCA64.mb.25             | 91.27  | 1.510 | 65  |
| Sample_SCA64.mb.36cbin.1       | 98.09  | 0.994 | 138 |
| Sample_SCA64.mb.102            | 95.95  | 0.000 | 74  |
| Sample_SCA64.mb.33             | 89.93  | 0.335 | 44  |
| Sample_SCA64.Cluster5527cbin.1 | 99.32  | 0.671 | 23  |
| Sample_SCA64.Cluster1692cbin.1 | 99.90  | 0.000 | 93  |
| Sample_SCA64.mb.51             | 82.55  | 0.000 | 86  |
| Sample_SCA64.mb.13cbin.1       | 96.98  | 1.682 | 161 |
| Sample_SCA64.mb.1cbin.1        | 86.58  | 0.909 | 218 |
| Sample_SCA64.mb.43cbin.1       | 94.06  | 1.478 | 196 |
| Sample_SCA64.mb.10             | 90.22  | 1.778 | 34  |
| Sample_SCA64.Cluster336        | 97.95  | 0.000 | 35  |
| Sample_SCA64.Cluster4286cbin.1 | 97.98  | 0.335 | 63  |
| Sample_SCA64.Cluster981        | 98.75  | 0.625 | 27  |
| Sample_SCA64.Cluster6262cbin.1 | 98.20  | 0.000 | 94  |
| Sample_SCA64.mb.4cbin.1        | 98.37  | 2.412 | 69  |
| Sample_SCA64.Cluster4525       | 98.87  | 0.000 | 24  |
| Sample_SCA64.mb.91             | 93.58  | 2.237 | 117 |
| Sample_SCA64.mb.48             | 92.62  | 0.880 | 226 |
| Sample_SCA64.mb.99             | 97.76  | 0.335 | 80  |
| Sample_SCA64.mb.79cbin.1       | 92.79  | 0.921 | 289 |
| Sample_SCA64.Cluster3798cbin.1 | 98.79  | 1.610 | 144 |
| Sample_SCA64.mb.65cbin.1       | 98.79  | 2.898 | 69  |
| Sample_SCA64.mb.81             | 99.51  | 3.525 | 31  |
| Sample_SCA64.mb.75cbin.1       | 98.61  | 0.576 | 39  |
| Sample_SCA64.mb.60             | 93.58  | 0.961 | 85  |
| Sample_SCA64.Cluster2169cbin.1 | 93.63  | 1.319 | 172 |



|                                |        |       |     |
|--------------------------------|--------|-------|-----|
| Sample_SCA64.mb.9              | 85.60  | 0.510 | 126 |
| Sample_SCA64.Cluster2443       | 95.71  | 0.269 | 147 |
| Sample_SCA64.mb.93cbin.1       | 97.16  | 1.886 | 97  |
| Sample_SCA64.Cluster3337       | 98.65  | 0.512 | 36  |
| Sample_SCA64.mb.74cbin.1       | 81.98  | 0.646 | 74  |
| Sample_SCA64.mb.77             | 85.82  | 0.371 | 80  |
| Sample_SCA64.mb.44             | 87.41  | 2.267 | 92  |
| Sample_SCA65.Cluster3577cbin.1 | 97.84  | 0.000 | 36  |
| Sample_SCA65.mb.10             | 97.42  | 1.470 | 86  |
| Sample_SCA65.mb.19             | 93.95  | 1.342 | 84  |
| Sample_SCA65.Cluster164cbin.1  | 93.28  | 0.671 | 54  |
| Sample_SCA65.mb.27cbin.1       | 84.35  | 2.284 | 181 |
| Sample_SCA65.Cluster3800       | 89.13  | 2.531 | 35  |
| Sample_SCA65.mb.13             | 91.94  | 0.083 | 75  |
| Sample_SCA65.mb.7              | 91.38  | 2.516 | 324 |
| Sample_SCA65.Cluster1800cbin.1 | 96.71  | 0.961 | 26  |
| Sample_SCA65.Cluster3067cbin.1 | 90.99  | 1.696 | 282 |
| Sample_SCA65.mb.24cbin.1       | 92.61  | 0.000 | 45  |
| Sample_SCA65.mb.79             | 93.62  | 2.013 | 86  |
| Sample_SCA65.Cluster1344       | 97.95  | 0.680 | 22  |
| Sample_SCA65.mb.14cbin.1       | 89.26  | 0.000 | 32  |
| Sample_SCA65.mb.16             | 94.52  | 0.000 | 50  |
| Sample_SCA65.mb.62             | 93.95  | 0.000 | 21  |
| Sample_SCA65.mb.61             | 98.04  | 1.442 | 35  |
| Sample_SCA65.mb.82             | 94.23  | 1.602 | 155 |
| Sample_SCA65.mb.43             | 93.95  | 0.000 | 29  |
| Sample_SCA65.mb.71cbin.1       | 93.28  | 1.860 | 34  |
| Sample_SCA65.mb.56cbin.1       | 88.57  | 4.143 | 233 |
| Sample_SCA65.mb.92             | 97.31  | 0.000 | 11  |
| Sample_SCA65.mb.54cbin.1       | 97.98  | 1.342 | 54  |
| Sample_SCA65.mb.96             | 95.96  | 0.268 | 38  |
| Sample_SCA65.Cluster4304cbin.1 | 94.20  | 2.053 | 98  |
| Sample_SCA65.Cluster4074cbin.1 | 93.90  | 1.881 | 437 |
| Sample_SCA65.Cluster3562cbin.1 | 83.07  | 4.460 | 41  |
| Sample_SCA65.mb.66cbin.1       | 93.10  | 0.751 | 168 |
| Sample_SCA65.mb.37cbin.1       | 97.62  | 0.576 | 54  |
| Sample_SCA65.mb.25             | 88.17  | 0.631 | 63  |
| Sample_SCA66.mb.53             | 91.99  | 3.020 | 108 |
| Sample_SCA66.Cluster55cbin.1   | 92.61  | 1.698 | 133 |
| Sample_SCA66.Cluster1328cbin.1 | 89.26  | 0.000 | 70  |
| Sample_SCA66.mb.82             | 91.57  | 2.247 | 55  |
| Sample_SCA66.Cluster3505cbin.1 | 99.18  | 0.077 | 54  |
| Sample_SCA66.mb.64cbin.1       | 98.65  | 0.000 | 37  |
| Sample_SCA66.mb.24cbin.1       | 97.15  | 1.956 | 172 |
| Sample_SCA66.mb.49cbin.1       | 94.42  | 2.995 | 216 |
| Sample_SCA66.Cluster1226       | 96.15  | 0.961 | 23  |
| Sample_SCA66.Cluster241cbin.1  | 94.63  | 2.628 | 157 |
| Sample_SCA66.Cluster4855cbin.1 | 95.97  | 0.671 | 18  |
| Sample_SCA66.Cluster7665       | 99.32  | 0.335 | 15  |
| Sample_SCA66.Cluster283        | 97.95  | 0.000 | 22  |
| Sample_SCA66.mb.83cbin.1       | 96.50  | 1.165 | 85  |
| Sample_SCA66.Cluster963        | 97.72  | 0.568 | 25  |
| Sample_SCA66.mb.39cbin.1       | 95.67  | 1.497 | 168 |
| Sample_SCA66.mb.22cbin.1       | 97.26  | 0.000 | 61  |
| Sample_SCA66.mb.40             | 95.89  | 1.449 | 83  |
| Sample_SCA66.Cluster1132cbin.1 | 100.00 | 0.000 | 44  |
| Sample_SCA66.mb.7              | 97.98  | 0.000 | 66  |
| Sample_SCA66.Cluster5969       | 97.73  | 0.000 | 15  |

|                                 |       |       |     |
|---------------------------------|-------|-------|-----|
| Sample_SCA66.mb.57              | 94.78 | 4.840 | 130 |
| Sample_SCA66.mb.59cbin.1        | 99.13 | 0.338 | 182 |
| Sample_SCA66.mb.80cbin.1        | 99.46 | 2.692 | 35  |
| Sample_SCA66.mb.35              | 89.37 | 4.710 | 72  |
| Sample_SCA66.mb.71              | 92.54 | 3.846 | 86  |
| Sample_SCA66.Cluster6953cbin.1  | 97.58 | 0.000 | 82  |
| Sample_SCA66.mb.84              | 99.03 | 3.381 | 95  |
| Sample_SCA66.mb.44              | 95.18 | 1.410 | 125 |
| Sample_SCA66.Cluster4395cbin.1  | 99.61 | 0.769 | 87  |
| Sample_SCA66.mb.92cbin.1        | 90.76 | 2.145 | 112 |
| Sample_SCA66.mb.62cbin.1        | 87.53 | 3.159 | 154 |
| Sample_SCA66.mb.88cbin.1        | 88.39 | 1.146 | 250 |
| Sample_SCA67.mb.128cbin.1       | 96.54 | 1.101 | 198 |
| Sample_SCA67.mb.121             | 96.77 | 0.806 | 47  |
| Sample_SCA67.mb.106             | 90.88 | 0.671 | 44  |
| Sample_SCA67.mb.59              | 88.00 | 0.000 | 54  |
| Sample_SCA67.mb.103             | 95.07 | 0.223 | 180 |
| Sample_SCA67.mb.111cbin.1       | 83.47 | 1.006 | 192 |
| Sample_SCA67.Cluster5052        | 85.55 | 0.000 | 56  |
| Sample_SCA67.mb.29cbin.1        | 84.29 | 3.313 | 288 |
| Sample_SCA67.mb.112cbin.1       | 87.91 | 1.311 | 56  |
| Sample_SCA67.Cluster3344cbin.1  | 98.07 | 2.403 | 31  |
| Sample_SCA67.Cluster15592cbin.1 | 88.65 | 2.465 | 407 |
| Sample_SCA67.mb.68cbin.1        | 93.38 | 0.762 | 201 |
| Sample_SCA67.mb.52cbin.1        | 93.28 | 4.161 | 48  |
| Sample_SCA67.mb.124cbin.1       | 89.37 | 4.228 | 284 |
| Sample_SCA67.mb.21              | 83.42 | 1.442 | 340 |
| Sample_SCA67.mb.90              | 97.76 | 0.000 | 57  |
| Sample_SCA67.Cluster9603cbin.1  | 91.73 | 4.610 | 191 |
| Sample_SCA67.mb.11cbin.1        | 91.54 | 2.245 | 109 |
| Sample_SCA67.mb.13              | 95.46 | 0.062 | 133 |
| Sample_SCA67.mb.32              | 83.01 | 0.000 | 336 |
| Sample_SCA67.mb.78              | 95.63 | 0.469 | 116 |
| Sample_SCA67.mb.42cbin.1        | 97.31 | 1.677 | 31  |
| Sample_SCA67.mb.63              | 92.28 | 1.230 | 163 |
| Sample_SCA67.mb.88              | 91.94 | 0.939 | 51  |
| Sample_SCA67.mb.1               | 98.86 | 0.000 | 33  |
| Sample_SCA67.mb.96              | 90.93 | 0.000 | 44  |
| Sample_SCA67.mb.41              | 99.03 | 1.449 | 55  |
| Sample_SCA67.mb.6cbin.1         | 99.32 | 0.000 | 20  |
| Sample_SCA67.mb.91              | 98.65 | 0.469 | 41  |
| Sample_SCA67.mb.97              | 97.09 | 0.000 | 31  |
| Sample_SCA67.mb.92cbin.1        | 93.26 | 4.887 | 275 |
| Sample_SCA67.mb.81              | 97.31 | 1.789 | 60  |
| Sample_SCA68.Cluster11483       | 85.95 | 1.123 | 14  |
| Sample_SCA68.Cluster11308       | 98.66 | 0.111 | 35  |
| Sample_SCA68.Cluster1343cbin.1  | 93.70 | 0.932 | 58  |
| Sample_SCA68.Cluster215cbin.1   | 91.49 | 0.000 | 64  |
| Sample_SCA68.Cluster53          | 82.88 | 1.006 | 43  |
| Sample_SCA68.mb.76              | 85.95 | 4.494 | 61  |
| Sample_SCA68.mb.69              | 92.93 | 1.342 | 24  |
| Sample_SCA68.mb.34cbin.1        | 81.19 | 0.592 | 265 |
| Sample_SCA68.mb.74cbin.1        | 96.77 | 0.000 | 68  |
| Sample_SCA68.mb.17              | 88.92 | 1.006 | 63  |
| Sample_SCA68.mb.31              | 81.65 | 2.237 | 79  |
| Sample_SCA68.mb.39              | 92.93 | 0.335 | 94  |
| Sample_SCA68.mb.49              | 95.74 | 1.342 | 47  |
| Sample_SCA68.Cluster224cbin.1   | 89.93 | 0.671 | 32  |

|                                |        |       |     |
|--------------------------------|--------|-------|-----|
| Sample_SCA68.mb.27             | 93.95  | 0.335 | 177 |
| Sample_SCA68.Cluster615cbin.1  | 92.39  | 2.034 | 149 |
| Sample_SCA68.mb.62             | 94.25  | 2.027 | 120 |
| Sample_SCA68.Cluster1382cbin.1 | 97.31  | 0.503 | 17  |
| Sample_SCA68.mb.30cbin.1       | 99.36  | 0.632 | 106 |
| Sample_SCA68.mb.45             | 92.72  | 0.000 | 148 |
| Sample_SCA68.Cluster2827cbin.1 | 97.27  | 1.342 | 22  |
| Sample_SCA68.Cluster10198      | 98.94  | 0.000 | 25  |
| Sample_SCA68.mb.79             | 87.91  | 4.781 | 45  |
| Sample_SCA68.mb.64cbin.1       | 98.55  | 2.884 | 80  |
| Sample_SCA68.mb.38             | 97.98  | 1.342 | 56  |
| Sample_SCA68.Cluster8245       | 99.51  | 0.000 | 51  |
| Sample_SCA68.mb.6              | 98.02  | 1.201 | 63  |
| Sample_SCA68.mb.65cbin.1       | 98.65  | 2.181 | 93  |
| Sample_SCA68.mb.81             | 97.09  | 0.000 | 32  |
| Sample_SCA68.Cluster5605cbin.1 | 98.14  | 1.610 | 63  |
| Sample_SCA68.mb.72cbin.1       | 98.12  | 0.877 | 305 |
| Sample_SCA68.mb.51cbin.1       | 93.27  | 2.133 | 262 |
| Sample_SCA69.Cluster5198cbin.1 | 93.26  | 4.362 | 22  |
| Sample_SCA69.Cluster249cbin.1  | 87.80  | 1.759 | 54  |
| Sample_SCA69.Cluster361cbin.1  | 83.67  | 4.926 | 294 |
| Sample_SCA69.mb.20             | 97.90  | 0.932 | 162 |
| Sample_SCA69.Cluster65cbin.1   | 89.11  | 0.000 | 27  |
| Sample_SCA69.Cluster3856       | 91.94  | 0.000 | 19  |
| Sample_SCA69.Cluster1774cbin.1 | 92.86  | 1.677 | 144 |
| Sample_SCA69.Cluster851        | 82.57  | 1.682 | 419 |
| Sample_SCA69.Cluster974cbin.1  | 91.66  | 1.612 | 105 |
| Sample_SCA69.mb.34             | 86.89  | 1.265 | 175 |
| Sample_SCA69.Cluster6cbin.1    | 85.98  | 1.808 | 324 |
| Sample_SCA69.Cluster12637      | 100.00 | 0.000 | 23  |
| Sample_SCA69.Cluster2119       | 93.76  | 0.598 | 34  |
| Sample_SCA69.Cluster12106      | 83.93  | 1.570 | 254 |
| Sample_SCA69.Cluster1131cbin.1 | 94.37  | 0.833 | 33  |
| Sample_SCA69.mb.40cbin.1       | 92.12  | 2.348 | 96  |
| Sample_SCA69.mb.26cbin.1       | 90.60  | 1.006 | 83  |
| Sample_SCA69.Cluster171cbin.1  | 92.49  | 1.020 | 345 |
| Sample_SCA69.Cluster347        | 86.39  | 2.947 | 63  |
| Sample_SCA69.Cluster8586cbin.1 | 98.65  | 0.000 | 23  |
| Sample_SCA69.mb.42cbin.1       | 93.28  | 3.020 | 59  |
| Sample_SCA69.mb.24             | 94.25  | 1.677 | 29  |
| Sample_SCA69.mb.21cbin.1       | 98.56  | 3.333 | 35  |
| Sample_SCA69.mb.22             | 96.31  | 4.423 | 57  |
| Sample_SCA69.Cluster8764       | 96.69  | 0.966 | 166 |
| Sample_SCA69.Cluster6685cbin.1 | 98.04  | 1.351 | 99  |
| Sample_SCA69.mb.54             | 91.94  | 1.016 | 41  |
| Sample_SCA69.mb.31             | 98.73  | 1.265 | 108 |
| Sample_SCA69.mb.78             | 97.98  | 0.806 | 44  |
| Sample_SCA69.mb.100cbin.1      | 91.55  | 2.229 | 279 |
| Sample_SCA69.mb.46             | 92.31  | 0.998 | 75  |
| Sample_SCA69.mb.64cbin.1       | 90.09  | 1.351 | 305 |
| Sample_SCA69.mb.73             | 89.26  | 0.223 | 58  |
| Sample_SCA69.mb.66             | 80.40  | 3.061 | 451 |
| Sample_SCA69.mb.55cbin.1       | 82.02  | 0.552 | 248 |
| Sample_SCA69.Cluster7739cbin.1 | 97.31  | 0.000 | 114 |
| Sample_SCA69.Cluster7332       | 93.56  | 0.961 | 115 |
| Sample_SCA69.Cluster7186cbin.1 | 98.14  | 0.210 | 60  |
| Sample_SCA69.mb.52             | 99.36  | 1.665 | 118 |
| Sample_SCA69.mb.75cbin.1       | 95.04  | 4.339 | 118 |

|                                 |        |       |     |
|---------------------------------|--------|-------|-----|
| Sample_SCA69.mb.86              | 94.65  | 1.362 | 106 |
| Sample_SCA69.mb.87              | 97.10  | 0.680 | 133 |
| Sample_SCA69.Cluster1375cbin.1  | 93.48  | 0.997 | 207 |
| Sample_SCA69.mb.72              | 87.16  | 0.377 | 38  |
| Sample_SCA69.mb.76              | 93.23  | 0.187 | 70  |
| Sample_SCA69.Cluster810         | 93.00  | 4.682 | 68  |
| Sample_SCA70.Cluster4533cbin.1  | 95.96  | 0.000 | 75  |
| Sample_SCA70.Cluster1750cbin.1  | 88.53  | 4.423 | 125 |
| Sample_SCA70.Cluster362cbin.1   | 90.60  | 4.194 | 96  |
| Sample_SCA70.mb.109cbin.1       | 89.09  | 0.806 | 284 |
| Sample_SCA70.Cluster572cbin.1   | 98.43  | 0.000 | 143 |
| Sample_SCA70.Cluster4600cbin.1  | 97.98  | 0.671 | 52  |
| Sample_SCA70.Cluster10417cbin.1 | 96.45  | 2.995 | 53  |
| Sample_SCA70.Cluster4264cbin.1  | 91.99  | 0.138 | 183 |
| Sample_SCA70.mb.14              | 93.24  | 1.342 | 92  |
| Sample_SCA70.mb.132cbin.1       | 99.32  | 0.671 | 20  |
| Sample_SCA70.mb.103cbin.1       | 88.59  | 2.839 | 142 |
| Sample_SCA70.Cluster4846        | 95.70  | 0.000 | 29  |
| Sample_SCA70.Cluster7775        | 100.00 | 0.898 | 44  |
| Sample_SCA70.Cluster8429cbin.1  | 95.30  | 0.167 | 71  |
| Sample_SCA70.Cluster5559cbin.1  | 97.33  | 0.000 | 36  |
| Sample_SCA70.mb.112             | 92.06  | 0.634 | 96  |
| Sample_SCA70.mb.116             | 87.69  | 0.000 | 87  |
| Sample_SCA70.Cluster2459cbin.1  | 97.79  | 0.000 | 63  |
| Sample_SCA70.Cluster11952cbin.1 | 98.22  | 0.966 | 137 |
| Sample_SCA70.Cluster10895cbin.1 | 95.60  | 2.646 | 147 |
| Sample_SCA70.mb.37cbin.1        | 89.16  | 4.026 | 103 |
| Sample_SCA70.Cluster4626cbin.1  | 96.08  | 0.880 | 209 |
| Sample_SCA70.mb.34              | 85.46  | 2.745 | 265 |
| Sample_SCA70.mb.115             | 80.33  | 0.952 | 304 |
| Sample_SCA70.mb.43cbin.1        | 95.22  | 0.000 | 90  |
| Sample_SCA70.mb.87cbin.1        | 95.80  | 3.263 | 254 |
| Sample_SCA70.mb.28              | 93.03  | 1.014 | 87  |
| Sample_SCA70.Cluster8153cbin.1  | 81.65  | 1.612 | 653 |
| Sample_SCA70.mb.47              | 80.02  | 0.339 | 155 |
| Sample_SCA70.mb.18              | 96.30  | 0.000 | 46  |
| Sample_SCA70.mb.36cbin.1        | 87.19  | 3.763 | 454 |
| Sample_SCA70.mb.40cbin.1        | 95.42  | 3.401 | 299 |
| Sample_SCA70.mb.70cbin.1        | 98.56  | 2.415 | 88  |
| Sample_SCA70.mb.82cbin.1        | 100.00 | 0.000 | 34  |
| Sample_SCA70.mb.69cbin.1        | 88.36  | 1.351 | 117 |
| Sample_SCA70.mb.83cbin.1        | 98.76  | 0.000 | 44  |
| Sample_SCA70.mb.90              | 96.55  | 1.006 | 45  |
| Sample_SCA70.mb.84cbin.1        | 94.35  | 2.013 | 100 |
| Sample_SCA70.mb.7cbin.1         | 95.97  | 1.677 | 55  |
| Sample_SCA70.mb.86cbin.1        | 96.41  | 0.377 | 54  |
| Sample_SCA70.Cluster527cbin.1   | 97.95  | 1.265 | 326 |
| Sample_SCA70.mb.65cbin.1        | 96.35  | 3.101 | 246 |
| Sample_SCB55.Cluster15779       | 100.00 | 0.111 | 27  |
| Sample_SCB55.Cluster6784cbin.1  | 92.74  | 1.612 | 49  |
| Sample_SCB55.mb.132cbin.1       | 98.27  | 2.664 | 32  |
| Sample_SCB55.Cluster5577cbin.1  | 80.05  | 1.342 | 200 |
| Sample_SCB55.mb.26              | 93.10  | 2.821 | 300 |
| Sample_SCB55.Cluster142         | 81.13  | 1.006 | 170 |
| Sample_SCB55.Cluster15984       | 97.60  | 0.000 | 21  |
| Sample_SCB55.mb.128             | 89.74  | 0.854 | 7   |
| Sample_SCB55.mb.123             | 96.64  | 0.000 | 20  |
| Sample_SCB55.Cluster15282       | 97.16  | 0.042 | 132 |

|                                 |        |       |     |
|---------------------------------|--------|-------|-----|
| Sample_SCB55.Cluster5831        | 92.95  | 0.000 | 36  |
| Sample_SCB55.mb.2               | 87.91  | 0.671 | 184 |
| Sample_SCB55.mb.111             | 89.66  | 0.894 | 87  |
| Sample_SCB55.mb.62              | 92.40  | 0.699 | 10  |
| Sample_SCB55.mb.20              | 90.26  | 2.348 | 44  |
| Sample_SCB55.Cluster1195        | 99.43  | 0.077 | 20  |
| Sample_SCB55.Cluster13242       | 98.79  | 0.294 | 50  |
| Sample_SCB55.mb.39              | 93.28  | 1.342 | 45  |
| Sample_SCB55.Cluster9473cbin.1  | 97.09  | 0.000 | 41  |
| Sample_SCB55.Cluster13869cbin.1 | 98.63  | 0.671 | 47  |
| Sample_SCB55.mb.57              | 95.30  | 0.671 | 49  |
| Sample_SCB55.mb.49cbin.1        | 93.52  | 1.666 | 48  |
| Sample_SCB55.mb.52cbin.1        | 85.17  | 3.075 | 265 |
| Sample_SCB55.mb.25              | 97.31  | 0.738 | 16  |
| Sample_SCB55.mb.96              | 93.35  | 0.699 | 280 |
| Sample_SCB55.mb.1cbin.1         | 89.65  | 3.522 | 162 |
| Sample_SCB55.mb.107cbin.1       | 96.06  | 1.545 | 167 |
| Sample_SCB55.mb.58              | 92.50  | 4.283 | 193 |
| Sample_SCB55.mb.71              | 88.72  | 2.013 | 272 |
| Sample_SCB55.mb.7               | 90.64  | 0.000 | 24  |
| Sample_SCB55.mb.94cbin.1        | 95.03  | 1.677 | 60  |
| Sample_SCB55.mb.97              | 97.18  | 1.342 | 56  |
| Sample_SCB55.mb.83              | 95.84  | 0.943 | 170 |
| Sample_SCB55.mb.61cbin.1        | 93.23  | 3.562 | 319 |
| Sample_SCB55.mb.17cbin.1        | 97.60  | 3.487 | 48  |
| Sample_SCB58.Cluster2238cbin.1  | 91.10  | 1.235 | 264 |
| Sample_SCB58.Cluster251cbin.1   | 89.68  | 0.000 | 36  |
| Sample_SCB58.Cluster7841        | 92.33  | 0.806 | 8   |
| Sample_SCB58.Cluster17584cbin.1 | 94.18  | 4.270 | 59  |
| Sample_SCB58.Cluster323cbin.1   | 82.40  | 0.732 | 289 |
| Sample_SCB58.mb.102             | 84.21  | 1.754 | 291 |
| Sample_SCB58.Cluster16941cbin.1 | 91.04  | 2.519 | 112 |
| Sample_SCB58.Cluster4731        | 100.00 | 0.115 | 13  |
| Sample_SCB58.Cluster533         | 89.93  | 1.342 | 65  |
| Sample_SCB58.Cluster14393cbin.1 | 81.62  | 1.979 | 332 |
| Sample_SCB58.mb.100             | 86.96  | 3.189 | 245 |
| Sample_SCB58.Cluster14600cbin.1 | 99.32  | 1.677 | 17  |
| Sample_SCB58.mb.21              | 86.79  | 2.247 | 31  |
| Sample_SCB58.Cluster11721cbin.1 | 97.09  | 0.000 | 27  |
| Sample_SCB58.Cluster5432cbin.1  | 91.93  | 0.021 | 65  |
| Sample_SCB58.mb.10              | 81.87  | 2.318 | 40  |
| Sample_SCB58.Cluster1280        | 97.95  | 0.000 | 29  |
| Sample_SCB58.mb.103cbin.1       | 95.14  | 4.416 | 222 |
| Sample_SCB58.mb.135             | 98.38  | 0.403 | 45  |
| Sample_SCB58.mb.126cbin.1       | 98.60  | 2.331 | 117 |
| Sample_SCB58.Cluster3866cbin.1  | 100.00 | 0.480 | 40  |
| Sample_SCB58.mb.43              | 91.57  | 2.247 | 33  |
| Sample_SCB58.mb.15              | 87.80  | 0.000 | 40  |
| Sample_SCB58.Cluster6185        | 96.60  | 0.000 | 18  |
| Sample_SCB58.Cluster11768       | 80.27  | 3.559 | 100 |
| Sample_SCB58.Cluster725         | 98.04  | 0.921 | 21  |
| Sample_SCB58.mb.132cbin.1       | 94.40  | 3.382 | 249 |
| Sample_SCB58.mb.76              | 87.07  | 3.531 | 51  |
| Sample_SCB58.mb.116             | 91.90  | 0.907 | 247 |
| Sample_SCB58.mb.32cbin.1        | 93.26  | 2.572 | 127 |
| Sample_SCB58.mb.59              | 84.38  | 1.901 | 141 |
| Sample_SCB58.mb.9               | 89.24  | 0.806 | 68  |

|                                 |        |       |     |
|---------------------------------|--------|-------|-----|
| Sample_SCB58.mb.34cbin.1        | 95.80  | 3.020 | 150 |
| Sample_SCB58.mb.39cbin.1        | 96.15  | 0.961 | 22  |
| Sample_SCB58.mb.87cbin.1        | 97.98  | 2.684 | 244 |
| Sample_SCB58.mb.31              | 96.63  | 0.000 | 39  |
| Sample_SCB58.mb.35              | 96.41  | 0.000 | 94  |
| Sample_SCB58.Cluster11034cbin.1 | 91.88  | 1.127 | 146 |
| Sample_SCB58.mb.7               | 91.27  | 1.342 | 76  |
| Sample_SCB58.Cluster9840cbin.1  | 99.46  | 0.000 | 109 |
| Sample_SCB58.mb.49              | 88.12  | 0.000 | 82  |
| Sample_SCB58.mb.20              | 98.31  | 0.961 | 30  |
| Sample_SCB58.mb.66              | 96.42  | 0.061 | 113 |
| Sample_SCB58.mb.46              | 92.93  | 2.348 | 180 |
| Sample_SCB58.mb.48              | 98.65  | 0.302 | 61  |
| Sample_SCB58.Cluster6891cbin.1  | 93.98  | 1.433 | 438 |
| Sample_SCB58.Cluster9211        | 99.23  | 0.897 | 42  |
| Sample_SCB58.mb.111             | 93.97  | 0.384 | 56  |
| Sample_SCB58.mb.96cbin.1        | 89.78  | 1.881 | 339 |
| Sample_SCB58.mb.97cbin.1        | 98.49  | 0.000 | 23  |
| Sample_SCB58.mb.60              | 97.47  | 1.100 | 136 |
| Sample_SCB59.Cluster161cbin.1   | 90.96  | 2.852 | 160 |
| Sample_SCB59.Cluster480         | 98.09  | 0.671 | 35  |
| Sample_SCB59.Cluster11926cbin.1 | 97.31  | 0.000 | 20  |
| Sample_SCB59.mb.142             | 94.29  | 4.026 | 136 |
| Sample_SCB59.mb.28              | 85.79  | 0.894 | 258 |
| Sample_SCB59.Cluster12411       | 99.32  | 2.684 | 25  |
| Sample_SCB59.mb.135cbin.1       | 96.80  | 0.800 | 154 |
| Sample_SCB59.mb.124cbin.1       | 94.71  | 4.921 | 144 |
| Sample_SCB59.mb.43cbin.1        | 93.26  | 2.013 | 36  |
| Sample_SCB59.Cluster4224cbin.1  | 97.27  | 4.250 | 30  |
| Sample_SCB59.mb.49              | 93.75  | 1.075 | 83  |
| Sample_SCB59.mb.17cbin.1        | 99.19  | 0.115 | 14  |
| Sample_SCB59.mb.25              | 93.79  | 2.348 | 113 |
| Sample_SCB59.mb.107             | 97.11  | 0.000 | 13  |
| Sample_SCB59.mb.16cbin.1        | 91.17  | 2.410 | 269 |
| Sample_SCB59.mb.81              | 84.26  | 3.370 | 21  |
| Sample_SCB59.mb.127             | 95.30  | 3.091 | 272 |
| Sample_SCB59.mb.109             | 93.41  | 0.335 | 77  |
| Sample_SCB59.mb.118             | 100.00 | 0.000 | 21  |
| Sample_SCB59.mb.4cbin.1         | 88.60  | 0.000 | 78  |
| Sample_SCB59.mb.113cbin.1       | 97.45  | 0.000 | 173 |
| Sample_SCB59.mb.51              | 89.00  | 0.223 | 113 |
| Sample_SCB59.Cluster32cbin.1    | 96.74  | 0.515 | 349 |
| Sample_SCB59.mb.101cbin.1       | 99.43  | 0.772 | 115 |
| Sample_SCB59.mb.18              | 94.23  | 0.961 | 60  |
| Sample_SCB59.mb.133cbin.1       | 89.24  | 4.161 | 308 |
| Sample_SCB59.mb.94cbin.1        | 100.00 | 0.806 | 82  |
| Sample_SCB59.mb.63cbin.1        | 92.39  | 0.894 | 135 |
| Sample_SCB59.mb.62cbin.1        | 94.74  | 0.671 | 117 |
| Sample_SCB59.mb.44              | 89.93  | 1.677 | 135 |
| Sample_SCB59.Cluster9671cbin.1  | 96.77  | 0.000 | 99  |
| Sample_SCB59.mb.40              | 93.59  | 1.759 | 42  |
| Sample_SCB59.Cluster7227        | 97.30  | 1.538 | 52  |
| Sample_SCB59.mb.73cbin.1        | 93.67  | 0.021 | 83  |
| Sample_SCB59.mb.141cbin.1       | 87.86  | 1.858 | 299 |
| Sample_SCB59.mb.97              | 95.19  | 0.000 | 7   |
| Sample_SCB59.mb.68              | 97.16  | 0.000 | 76  |
| Sample_SCB59.mb.9cbin.1         | 99.03  | 0.897 | 255 |
| Sample_SCB60.Cluster14735cbin.1 | 96.62  | 2.247 | 55  |

|                                 |        |       |     |
|---------------------------------|--------|-------|-----|
| Sample_SCB60.Cluster14408       | 89.74  | 1.424 | 40  |
| Sample_SCB60.Cluster2146cbin.1  | 88.25  | 1.342 | 74  |
| Sample_SCB60.mb.15              | 94.94  | 2.407 | 39  |
| Sample_SCB60.mb.102cbin.1       | 88.03  | 0.854 | 30  |
| Sample_SCB60.mb.10              | 95.09  | 1.510 | 88  |
| Sample_SCB60.Cluster242         | 100.00 | 0.806 | 33  |
| Sample_SCB60.Cluster11239       | 87.91  | 0.000 | 16  |
| Sample_SCB60.mb.135             | 95.30  | 0.000 | 79  |
| Sample_SCB60.Cluster3500cbin.1  | 94.11  | 0.907 | 218 |
| Sample_SCB60.Cluster10627cbin.1 | 89.36  | 1.096 | 336 |
| Sample_SCB60.Cluster1947        | 97.46  | 0.000 | 73  |
| Sample_SCB60.Cluster10659       | 97.31  | 0.335 | 34  |
| Sample_SCB60.Cluster350cbin.1   | 86.98  | 1.250 | 275 |
| Sample_SCB60.Cluster568cbin.1   | 93.95  | 2.684 | 157 |
| Sample_SCB60.Cluster2276        | 97.95  | 0.000 | 23  |
| Sample_SCB60.mb.30cbin.1        | 93.24  | 1.864 | 79  |
| Sample_SCB60.mb.17              | 93.95  | 0.894 | 83  |
| Sample_SCB60.mb.100cbin.1       | 91.56  | 1.677 | 237 |
| Sample_SCB60.mb.76              | 85.95  | 2.247 | 33  |
| Sample_SCB60.mb.103cbin.1       | 94.63  | 0.000 | 61  |
| Sample_SCB60.mb.18cbin.1        | 94.63  | 0.000 | 64  |
| Sample_SCB60.mb.36              | 93.24  | 2.364 | 83  |
| Sample_SCB60.mb.129             | 91.68  | 0.000 | 106 |
| Sample_SCB60.mb.111cbin.1       | 99.51  | 0.641 | 124 |
| Sample_SCB60.mb.24              | 87.24  | 0.000 | 11  |
| Sample_SCB60.mb.57              | 90.91  | 3.020 | 76  |
| Sample_SCB60.mb.72              | 86.57  | 1.235 | 217 |
| Sample_SCB60.mb.67              | 80.53  | 0.000 | 50  |
| Sample_SCB60.mb.32              | 97.59  | 1.442 | 34  |
| Sample_SCB60.Cluster8880        | 95.09  | 0.000 | 29  |
| Sample_SCB60.mb.75              | 93.43  | 2.341 | 308 |
| Sample_SCB60.mb.49cbin.1        | 99.32  | 1.782 | 24  |
| Sample_SCB60.Cluster9407cbin.1  | 96.56  | 4.729 | 391 |
| Sample_SCB60.mb.12cbin.1        | 98.38  | 0.000 | 160 |
| Sample_SCB60.mb.82              | 95.03  | 0.961 | 168 |
| Sample_SCB60.mb.74cbin.1        | 95.30  | 2.684 | 73  |
| Sample_SCB60.mb.81              | 89.65  | 1.304 | 61  |
| Sample_SCB60.Cluster1292cbin.1  | 91.83  | 2.905 | 95  |
| Sample_SCB61.Cluster2650        | 96.77  | 0.000 | 56  |
| Sample_SCB61.mb.103             | 80.70  | 0.000 | 34  |
| Sample_SCB61.Cluster8139        | 99.32  | 1.342 | 15  |
| Sample_SCB61.mb.67cbin.1        | 82.75  | 0.000 | 217 |
| Sample_SCB61.mb.27              | 93.95  | 1.006 | 42  |
| Sample_SCB61.mb.34              | 88.97  | 2.331 | 383 |
| Sample_SCB61.mb.40cbin.1        | 89.59  | 0.894 | 332 |
| Sample_SCB61.mb.47              | 96.75  | 4.026 | 143 |
| Sample_SCB61.Cluster1101cbin.1  | 86.05  | 0.961 | 23  |
| Sample_SCB61.mb.114cbin.1       | 97.04  | 4.746 | 44  |
| Sample_SCB61.Cluster6209        | 97.98  | 0.000 | 28  |
| Sample_SCB61.Cluster5839        | 99.32  | 0.671 | 19  |
| Sample_SCB61.Cluster112         | 97.95  | 0.000 | 26  |
| Sample_SCB61.mb.45              | 93.15  | 0.000 | 181 |
| Sample_SCB61.mb.82              | 91.94  | 0.000 | 74  |
| Sample_SCB61.Cluster523         | 96.87  | 0.000 | 34  |
| Sample_SCB61.mb.50cbin.1        | 88.40  | 1.449 | 43  |
| Sample_SCB61.Cluster4479        | 98.65  | 0.000 | 21  |
| Sample_SCB61.mb.79              | 83.94  | 1.677 | 330 |
| Sample_SCB61.mb.109cbin.1       | 95.88  | 2.531 | 130 |

|                                |        |       |     |
|--------------------------------|--------|-------|-----|
| Sample_SCB61.mb.44cbin.1       | 88.67  | 4.761 | 111 |
| Sample_SCB61.mb.31cbin.1       | 92.39  | 3.485 | 61  |
| Sample_SCB61.mb.76cbin.1       | 85.70  | 4.081 | 167 |
| Sample_SCB61.mb.88             | 90.86  | 0.000 | 30  |
| Sample_SCB61.mb.3              | 81.33  | 0.716 | 526 |
| Sample_SCB61.mb.83             | 90.08  | 2.066 | 79  |
| Sample_SCB61.Cluster4578cbin.1 | 95.25  | 2.215 | 195 |
| Sample_SCB61.mb.91cbin.1       | 99.51  | 0.000 | 25  |
| Sample_SCB61.Cluster3478cbin.1 | 89.03  | 1.858 | 44  |
| Sample_SCB61.mb.94             | 95.84  | 0.000 | 25  |
| Sample_SCB61.mb.99cbin.1       | 91.06  | 3.461 | 119 |
| Sample_SCB61.mb.90             | 98.65  | 0.576 | 30  |
| Sample_SCB61.mb.28cbin.1       | 99.21  | 0.365 | 83  |
| Sample_SCB64.Cluster3052       | 81.85  | 1.342 | 31  |
| Sample_SCB64.mb.29cbin.1       | 82.45  | 0.000 | 119 |
| Sample_SCB64.Cluster4934cbin.1 | 92.58  | 0.335 | 254 |
| Sample_SCB64.Cluster7568       | 94.63  | 3.020 | 71  |
| Sample_SCB64.Cluster4325       | 98.32  | 1.342 | 43  |
| Sample_SCB64.Cluster7301cbin.1 | 88.97  | 4.749 | 200 |
| Sample_SCB64.mb.4              | 90.38  | 1.923 | 259 |
| Sample_SCB64.Cluster5490cbin.1 | 84.00  | 1.140 | 197 |
| Sample_SCB64.Cluster3178cbin.1 | 100.00 | 0.000 | 95  |
| Sample_SCB64.Cluster328cbin.1  | 90.14  | 0.480 | 38  |
| Sample_SCB64.Cluster1273       | 98.75  | 0.625 | 25  |
| Sample_SCB64.mb.31             | 85.63  | 1.510 | 178 |
| Sample_SCB64.mb.124cbin.1      | 98.65  | 2.848 | 112 |
| Sample_SCB64.Cluster4422cbin.1 | 97.58  | 3.864 | 78  |
| Sample_SCB64.mb.16             | 98.16  | 2.016 | 171 |
| Sample_SCB64.Cluster345        | 97.95  | 0.000 | 38  |
| Sample_SCB64.Cluster7227       | 99.32  | 0.671 | 24  |
| Sample_SCB64.mb.54cbin.1       | 92.55  | 2.237 | 121 |
| Sample_SCB64.mb.108cbin.1      | 86.17  | 3.225 | 34  |
| Sample_SCB64.mb.105cbin.1      | 96.64  | 0.671 | 35  |
| Sample_SCB64.mb.34             | 97.95  | 1.360 | 211 |
| Sample_SCB64.Cluster9343cbin.1 | 95.30  | 3.355 | 28  |
| Sample_SCB64.mb.18cbin.1       | 91.81  | 4.545 | 33  |
| Sample_SCB64.mb.67             | 80.57  | 1.207 | 298 |
| Sample_SCB64.mb.55             | 94.71  | 0.961 | 37  |
| Sample_SCB64.Cluster4386cbin.1 | 96.34  | 2.985 | 78  |
| Sample_SCB64.mb.28             | 97.23  | 0.591 | 430 |
| Sample_SCB64.Cluster4283cbin.1 | 98.46  | 0.512 | 37  |
| Sample_SCB64.mb.8cbin.1        | 94.25  | 2.203 | 183 |
| Sample_SCB64.mb.57cbin.1       | 89.39  | 3.401 | 101 |
| Sample_SCB64.mb.92             | 95.30  | 0.000 | 19  |
| Sample_SCB64.mb.89             | 86.38  | 0.283 | 123 |
| Sample_SCB64.mb.69cbin.1       | 97.99  | 0.724 | 115 |
| Sample_SCB64.mb.95cbin.1       | 85.15  | 1.054 | 299 |
| Sample_SCB64.mb.122            | 85.59  | 1.119 | 76  |
| Sample_SCB64.mb.46cbin.1       | 96.92  | 0.000 | 87  |
| Sample_SCB64.mb.58cbin.1       | 85.73  | 3.667 | 157 |
| Sample_SCB64.mb.72             | 88.10  | 0.371 | 42  |
| Sample_SCB64.mb.81cbin.1       | 97.82  | 1.545 | 185 |
| Sample_SCB65.Cluster2978       | 97.84  | 0.000 | 37  |
| Sample_SCB65.mb.19             | 95.25  | 0.537 | 204 |
| Sample_SCB65.mb.43cbin.1       | 82.29  | 1.677 | 320 |
| Sample_SCB65.mb.57             | 85.04  | 4.697 | 366 |
| Sample_SCB65.mb.27cbin.1       | 98.52  | 0.518 | 84  |
| Sample_SCB65.Cluster3240       | 92.63  | 0.632 | 33  |



|                                |        |       |     |
|--------------------------------|--------|-------|-----|
| Sample_SCB65.Cluster2325cbin.1 | 87.26  | 2.794 | 323 |
| Sample_SCB65.mb.34             | 83.11  | 0.988 | 391 |
| Sample_SCB65.mb.24cbin.1       | 95.97  | 0.000 | 59  |
| Sample_SCB65.Cluster6701       | 97.31  | 2.348 | 25  |
| Sample_SCB65.Cluster7656cbin.1 | 97.31  | 0.671 | 18  |
| Sample_SCB65.Cluster123        | 97.95  | 0.680 | 28  |
| Sample_SCB65.mb.70cbin.1       | 91.27  | 3.811 | 152 |
| Sample_SCB65.mb.54             | 85.20  | 1.372 | 277 |
| Sample_SCB65.Cluster4782cbin.1 | 98.65  | 0.692 | 33  |
| Sample_SCB65.Cluster98cbin.1   | 98.23  | 3.846 | 43  |
| Sample_SCB65.mb.10             | 93.95  | 0.000 | 42  |
| Sample_SCB65.mb.3              | 91.82  | 3.265 | 151 |
| Sample_SCB65.mb.66             | 100.00 | 0.268 | 47  |
| Sample_SCB65.mb.79             | 95.63  | 2.852 | 100 |
| Sample_SCB65.mb.84             | 88.78  | 1.682 | 102 |
| Sample_SCB65.Cluster4891cbin.1 | 95.00  | 1.811 | 66  |
| Sample_SCB65.mb.68cbin.1       | 86.15  | 0.000 | 53  |
| Sample_SCB65.mb.72cbin.1       | 89.88  | 3.571 | 229 |
| Sample_SCB65.mb.9cbin.1        | 90.41  | 0.000 | 57  |
| Sample_SCB65.Cluster4119cbin.1 | 93.81  | 0.017 | 506 |
| Sample_SCB65.mb.77cbin.1       | 96.83  | 0.105 | 108 |
| Sample_SCB65.mb.28cbin.1       | 95.92  | 1.503 | 199 |
| Sample_SCB65.mb.20             | 97.50  | 0.705 | 46  |
| Sample_SCB65.mb.37             | 91.89  | 4.288 | 127 |
| Sample_SCB65.mb.4cbin.1        | 89.30  | 1.346 | 658 |
| Sample_SCB65.mb.74cbin.1       | 95.01  | 0.185 | 42  |
| Sample_SCB65.mb.65cbin.1       | 95.81  | 1.499 | 59  |
| Sample_SCB66.Cluster9757cbin.1 | 82.02  | 0.000 | 37  |
| Sample_SCB66.Cluster3087       | 92.93  | 1.342 | 23  |
| Sample_SCB66.Cluster9832cbin.1 | 92.69  | 2.247 | 29  |
| Sample_SCB66.mb.113            | 92.13  | 1.284 | 9   |
| Sample_SCB66.Cluster314cbin.1  | 97.31  | 0.894 | 66  |
| Sample_SCB66.Cluster326cbin.1  | 93.28  | 1.342 | 67  |
| Sample_SCB66.Cluster6cbin.1    | 88.46  | 1.342 | 351 |
| Sample_SCB66.Cluster2065       | 92.61  | 1.230 | 18  |
| Sample_SCB66.Cluster3667cbin.1 | 99.18  | 0.000 | 33  |
| Sample_SCB66.Cluster3687cbin.1 | 95.56  | 1.265 | 22  |
| Sample_SCB66.Cluster2786cbin.1 | 92.55  | 1.671 | 267 |
| Sample_SCB66.Cluster7029       | 99.32  | 2.348 | 15  |
| Sample_SCB66.Cluster332        | 97.95  | 0.000 | 19  |
| Sample_SCB66.Cluster1226       | 93.01  | 0.795 | 21  |
| Sample_SCB66.Cluster7847cbin.1 | 95.97  | 0.671 | 18  |
| Sample_SCB66.mb.23cbin.1       | 95.46  | 1.265 | 124 |
| Sample_SCB66.mb.36cbin.1       | 99.59  | 0.115 | 33  |
| Sample_SCB66.mb.65             | 98.38  | 0.000 | 86  |
| Sample_SCB66.mb.5cbin.1        | 94.40  | 0.932 | 77  |
| Sample_SCB66.Cluster6263       | 99.47  | 0.261 | 74  |
| Sample_SCB66.Cluster5296cbin.1 | 93.25  | 0.120 | 92  |
| Sample_SCB66.Cluster5056       | 97.26  | 0.000 | 32  |
| Sample_SCB66.Cluster1256cbin.1 | 93.17  | 3.766 | 264 |
| Sample_SCB66.mb.107cbin.1      | 95.27  | 3.093 | 137 |
| Sample_SCB66.mb.84             | 98.65  | 0.000 | 22  |
| Sample_SCB66.Cluster9252cbin.1 | 94.33  | 2.500 | 100 |
| Sample_SCB66.Cluster1136cbin.1 | 100.00 | 0.000 | 45  |
| Sample_SCB66.Cluster3927cbin.1 | 91.36  | 0.806 | 424 |
| Sample_SCB66.mb.59             | 94.71  | 1.923 | 25  |
| Sample_SCB66.mb.51cbin.1       | 95.35  | 1.700 | 268 |
| Sample_SCB66.mb.85             | 90.81  | 1.006 | 128 |

|                                 |       |       |     |
|---------------------------------|-------|-------|-----|
| Sample_SCB66.Cluster5699        | 99.62 | 0.000 | 15  |
| Sample_SCB66.mb.95cbin.1        | 81.21 | 1.877 | 393 |
| Sample_SCB66.mb.40              | 99.03 | 1.250 | 30  |
| Sample_SCB66.mb.80              | 93.23 | 3.381 | 153 |
| Sample_SCB66.mb.89cbin.1        | 94.63 | 2.013 | 115 |
| Sample_SCB66.Cluster4043        | 99.61 | 3.230 | 71  |
| Sample_SCB66.mb.96              | 95.10 | 1.036 | 79  |
| Sample_SCB66.mb.62              | 94.03 | 2.056 | 115 |
| Sample_SCB66.mb.87              | 97.98 | 0.000 | 81  |
| Sample_SCB66.mb.76              | 94.23 | 0.909 | 49  |
| Sample_SCB66.mb.30              | 96.41 | 3.396 | 120 |
| Sample_SCB67.Cluster3713cbin.1  | 98.23 | 1.209 | 106 |
| Sample_SCB67.Cluster1428        | 95.97 | 0.000 | 22  |
| Sample_SCB67.mb.101             | 97.42 | 0.027 | 68  |
| Sample_SCB67.Cluster12262       | 98.99 | 0.000 | 53  |
| Sample_SCB67.Cluster6508        | 80.98 | 0.000 | 50  |
| Sample_SCB67.Cluster13396cbin.1 | 94.19 | 0.740 | 97  |
| Sample_SCB67.Cluster10940cbin.1 | 97.10 | 1.992 | 62  |
| Sample_SCB67.Cluster3518        | 93.99 | 0.961 | 24  |
| Sample_SCB67.Cluster19cbin.1    | 87.47 | 0.310 | 346 |
| Sample_SCB67.mb.121             | 92.61 | 1.957 | 70  |
| Sample_SCB67.Cluster6180cbin.1  | 95.85 | 0.185 | 138 |
| Sample_SCB67.Cluster2274cbin.1  | 99.03 | 0.721 | 87  |
| Sample_SCB67.Cluster15509       | 98.97 | 0.183 | 24  |
| Sample_SCB67.mb.24cbin.1        | 86.57 | 0.335 | 14  |
| Sample_SCB67.Cluster6745cbin.1  | 98.10 | 0.021 | 81  |
| Sample_SCB67.mb.123cbin.1       | 97.31 | 0.671 | 85  |
| Sample_SCB67.mb.59cbin.1        | 90.66 | 0.000 | 46  |
| Sample_SCB67.mb.142             | 97.42 | 0.488 | 57  |
| Sample_SCB67.Cluster17310cbin.1 | 93.02 | 0.805 | 410 |
| Sample_SCB67.mb.26              | 86.46 | 1.962 | 374 |
| Sample_SCB67.mb.61              | 89.11 | 2.822 | 174 |
| Sample_SCB67.mb.10              | 95.97 | 0.000 | 20  |
| Sample_SCB67.Cluster153cbin.1   | 97.65 | 2.013 | 148 |
| Sample_SCB67.mb.12              | 84.92 | 0.738 | 101 |
| Sample_SCB67.mb.138             | 96.21 | 1.778 | 142 |
| Sample_SCB67.mb.34              | 87.91 | 1.006 | 38  |
| Sample_SCB67.mb.45              | 85.57 | 0.000 | 135 |
| Sample_SCB67.mb.58cbin.1        | 87.24 | 0.134 | 38  |
| Sample_SCB67.mb.85              | 83.28 | 3.691 | 91  |
| Sample_SCB67.mb.113             | 99.24 | 0.000 | 16  |
| Sample_SCB67.mb.7cbin.1         | 80.01 | 2.705 | 287 |
| Sample_SCB67.mb.65cbin.1        | 94.79 | 4.697 | 243 |
| Sample_SCB67.Cluster7159        | 88.56 | 1.602 | 302 |
| Sample_SCB67.mb.44              | 92.33 | 0.000 | 48  |
| Sample_SCB67.mb.76cbin.1        | 98.05 | 0.000 | 56  |
| Sample_SCB67.mb.117             | 80.84 | 1.474 | 532 |
| Sample_SCB67.mb.64cbin.1        | 93.73 | 3.578 | 190 |
| Sample_SCB67.mb.80              | 98.65 | 0.335 | 44  |
| Sample_SCB67.mb.95cbin.1        | 83.89 | 0.335 | 16  |
| Sample_SCB67.mb.81              | 97.09 | 0.000 | 31  |
| Sample_SCB67.mb.87              | 88.35 | 0.062 | 69  |
| Sample_SCB68.mb.52              | 86.66 | 1.454 | 34  |
| Sample_SCB68.Cluster1534cbin.1  | 89.51 | 0.932 | 51  |
| Sample_SCB68.mb.42              | 94.15 | 2.089 | 208 |
| Sample_SCB68.mb.29              | 97.45 | 0.000 | 80  |
| Sample_SCB68.mb.8               | 91.57 | 1.123 | 14  |
| Sample_SCB68.mb.62cbin.1        | 88.70 | 3.230 | 157 |

|                                 |        |       |     |
|---------------------------------|--------|-------|-----|
| Sample_SCB68.mb.16cbin.1        | 95.22  | 2.348 | 100 |
| Sample_SCB68.mb.72              | 97.20  | 1.165 | 70  |
| Sample_SCB68.Cluster1151cbin.1  | 87.75  | 0.000 | 50  |
| Sample_SCB68.Cluster863cbin.1   | 88.59  | 0.335 | 54  |
| Sample_SCB68.Cluster1667cbin.1  | 85.46  | 2.013 | 255 |
| Sample_SCB68.mb.60cbin.1        | 95.58  | 0.671 | 67  |
| Sample_SCB68.mb.49              | 82.29  | 1.677 | 311 |
| Sample_SCB68.Cluster2701        | 88.25  | 0.000 | 13  |
| Sample_SCB68.mb.10              | 96.87  | 1.682 | 36  |
| Sample_SCB68.Cluster8682cbin.1  | 95.97  | 0.335 | 41  |
| Sample_SCB68.Cluster2582cbin.1  | 98.73  | 0.632 | 96  |
| Sample_SCB68.Cluster3722cbin.1  | 92.23  | 2.684 | 19  |
| Sample_SCB68.mb.77              | 82.28  | 2.348 | 502 |
| Sample_SCB68.Cluster290         | 91.82  | 0.993 | 50  |
| Sample_SCB68.mb.47              | 99.32  | 0.000 | 25  |
| Sample_SCB68.Cluster8783cbin.1  | 98.94  | 0.000 | 39  |
| Sample_SCB68.mb.51              | 98.38  | 0.045 | 66  |
| Sample_SCB68.mb.68              | 97.09  | 0.894 | 32  |
| Sample_SCB68.Cluster8615cbin.1  | 98.83  | 0.584 | 77  |
| Sample_SCB68.Cluster3863cbin.1  | 80.46  | 0.576 | 367 |
| Sample_SCB68.mb.2               | 93.98  | 1.524 | 201 |
| Sample_SCB68.mb.33              | 93.68  | 1.486 | 80  |
| Sample_SCB68.mb.27cbin.1        | 97.97  | 0.710 | 208 |
| Sample_SCB69.Cluster6357        | 91.25  | 1.677 | 21  |
| Sample_SCB69.Cluster69          | 89.51  | 3.629 | 25  |
| Sample_SCB69.mb.12              | 97.01  | 0.000 | 87  |
| Sample_SCB69.mb.110             | 83.89  | 0.447 | 34  |
| Sample_SCB69.mb.123cbin.1       | 93.35  | 2.215 | 143 |
| Sample_SCB69.mb.46              | 86.30  | 0.000 | 261 |
| Sample_SCB69.mb.127             | 87.91  | 0.671 | 33  |
| Sample_SCB69.mb.32              | 85.36  | 0.671 | 63  |
| Sample_SCB69.mb.108cbin.1       | 91.94  | 4.697 | 194 |
| Sample_SCB69.Cluster13611       | 100.00 | 0.000 | 23  |
| Sample_SCB69.Cluster2393        | 99.38  | 0.598 | 30  |
| Sample_SCB69.mb.10              | 89.39  | 0.528 | 108 |
| Sample_SCB69.mb.28              | 97.84  | 2.419 | 98  |
| Sample_SCB69.Cluster5203        | 98.89  | 0.000 | 67  |
| Sample_SCB69.mb.113             | 87.36  | 0.460 | 30  |
| Sample_SCB69.Cluster12889       | 99.47  | 2.094 | 168 |
| Sample_SCB69.Cluster10744cbin.1 | 97.36  | 0.671 | 263 |
| Sample_SCB69.Cluster9183        | 98.65  | 0.000 | 21  |
| Sample_SCB69.mb.25cbin.1        | 95.26  | 0.894 | 28  |
| Sample_SCB69.mb.111cbin.1       | 94.18  | 0.883 | 93  |
| Sample_SCB69.Cluster1157cbin.1  | 89.71  | 1.300 | 25  |
| Sample_SCB69.Cluster10340cbin.1 | 98.55  | 0.000 | 83  |
| Sample_SCB69.mb.116             | 91.78  | 1.077 | 57  |
| Sample_SCB69.Cluster13349cbin.1 | 86.53  | 3.059 | 539 |
| Sample_SCB69.mb.31              | 96.25  | 0.680 | 104 |
| Sample_SCB69.mb.78              | 80.42  | 0.000 | 33  |
| Sample_SCB69.mb.87cbin.1        | 98.38  | 0.806 | 44  |
| Sample_SCB69.mb.15              | 93.20  | 0.377 | 34  |
| Sample_SCB69.Cluster6631cbin.1  | 95.16  | 1.075 | 144 |
| Sample_SCB69.mb.122cbin.1       | 91.81  | 2.534 | 181 |
| Sample_SCB69.mb.66cbin.1        | 90.60  | 2.852 | 38  |
| Sample_SCB69.mb.72              | 94.63  | 0.092 | 173 |
| Sample_SCB69.mb.80cbin.1        | 91.89  | 2.702 | 405 |
| Sample_SCB69.mb.82cbin.1        | 89.26  | 4.209 | 70  |
| Sample_SCB69.mb.54              | 94.25  | 1.013 | 66  |

|                                 |        |       |     |
|---------------------------------|--------|-------|-----|
| Sample_SCB69.mb.97              | 85.44  | 3.914 | 48  |
| Sample_SCB69.mb.91cbin.1        | 92.61  | 1.525 | 25  |
| Sample_SCB69.mb.47              | 99.20  | 2.373 | 88  |
| Sample_SCB69.mb.101             | 93.40  | 2.097 | 142 |
| Sample_SCB69.mb.89cbin.1        | 94.56  | 0.961 | 316 |
| Sample_SCB69.mb.94              | 87.98  | 3.401 | 389 |
| Sample_SCB69.mb.99cbin.1        | 98.73  | 1.265 | 101 |
| Sample_SCB69.mb.74              | 93.55  | 4.567 | 275 |
| Sample_SCB69.mb.95cbin.1        | 91.23  | 0.496 | 93  |
| Sample_SCB69.mb.30              | 98.39  | 0.833 | 82  |
| Sample_SCB69.Cluster2719cbin.1  | 95.97  | 3.396 | 219 |
| Sample_SCB69.mb.96              | 94.28  | 1.972 | 233 |
| Sample_SCB69.mb.41cbin.1        | 95.99  | 1.115 | 64  |
| Sample_SCB69.mb.39              | 97.36  | 0.222 | 100 |
| Sample_SCB70.Cluster16715       | 89.32  | 1.284 | 15  |
| Sample_SCB70.Cluster16251       | 93.53  | 4.494 | 35  |
| Sample_SCB70.Cluster403cbin.1   | 98.38  | 0.000 | 46  |
| Sample_SCB70.Cluster14535       | 86.24  | 0.000 | 24  |
| Sample_SCB70.mb.28              | 91.01  | 0.000 | 32  |
| Sample_SCB70.mb.12              | 89.51  | 0.000 | 43  |
| Sample_SCB70.Cluster394         | 86.91  | 3.355 | 38  |
| Sample_SCB70.Cluster73cbin.1    | 86.01  | 0.223 | 59  |
| Sample_SCB70.Cluster3672        | 94.63  | 0.671 | 42  |
| Sample_SCB70.Cluster14944       | 90.85  | 1.314 | 174 |
| Sample_SCB70.Cluster16059cbin.1 | 86.40  | 1.333 | 17  |
| Sample_SCB70.mb.114             | 81.60  | 1.418 | 286 |
| Sample_SCB70.Cluster6337cbin.1  | 100.00 | 0.898 | 42  |
| Sample_SCB70.mb.54              | 91.66  | 4.032 | 320 |
| Sample_SCB70.Cluster8cbin.1     | 82.63  | 1.972 | 381 |
| Sample_SCB70.mb.74              | 99.19  | 1.075 | 57  |
| Sample_SCB70.Cluster4044        | 93.76  | 0.000 | 28  |
| Sample_SCB70.mb.16              | 88.28  | 1.478 | 272 |
| Sample_SCB70.mb.10              | 95.57  | 0.680 | 233 |
| Sample_SCB70.mb.37              | 85.96  | 3.020 | 106 |
| Sample_SCB70.Cluster8507cbin.1  | 97.09  | 0.000 | 39  |
| Sample_SCB70.mb.112             | 98.38  | 2.560 | 89  |
| Sample_SCB70.mb.17cbin.1        | 94.02  | 0.939 | 141 |
| Sample_SCB70.mb.14              | 98.38  | 3.961 | 53  |
| Sample_SCB70.mb.58              | 90.48  | 4.113 | 371 |
| Sample_SCB70.mb.27cbin.1        | 98.65  | 0.000 | 38  |
| Sample_SCB70.mb.52cbin.1        | 83.79  | 4.697 | 87  |
| Sample_SCB70.mb.44              | 97.58  | 2.688 | 171 |
| Sample_SCB70.mb.63              | 90.39  | 0.634 | 93  |
| Sample_SCB70.mb.77cbin.1        | 89.70  | 2.013 | 114 |
| Sample_SCB70.mb.34cbin.1        | 97.18  | 0.335 | 37  |
| Sample_SCB70.mb.29              | 94.66  | 0.579 | 58  |
| Sample_SCB70.mb.8               | 86.74  | 4.026 | 49  |
| Sample_SCB70.mb.96              | 90.60  | 0.671 | 30  |
| Sample_SCB70.mb.78cbin.1        | 97.42  | 0.000 | 59  |
| Sample_SCC55.mb.2               | 89.74  | 0.854 | 7   |
| Sample_SCC55.Cluster5346        | 96.10  | 0.838 | 155 |
| Sample_SCC55.Cluster1346cbin.1  | 95.97  | 0.671 | 112 |
| Sample_SCC55.Cluster2360        | 92.05  | 0.335 | 62  |
| Sample_SCC55.mb.25              | 86.01  | 2.684 | 195 |
| Sample_SCC55.Cluster2032cbin.1  | 94.60  | 1.666 | 57  |
| Sample_SCC55.Cluster37          | 92.47  | 1.612 | 81  |
| Sample_SCC55.Cluster1341        | 87.65  | 0.185 | 64  |
| Sample_SCC55.Cluster4708cbin.1  | 98.99  | 0.000 | 41  |

|                                 |        |       |     |
|---------------------------------|--------|-------|-----|
| Sample_SCC55.Cluster1689        | 92.72  | 0.632 | 52  |
| Sample_SCC55.mb.72cbin.1        | 97.60  | 0.000 | 45  |
| Sample_SCC55.mb.33cbin.1        | 87.06  | 0.671 | 271 |
| Sample_SCC55.Cluster3849        | 85.44  | 2.534 | 278 |
| Sample_SCC55.Cluster7696cbin.1  | 93.27  | 2.931 | 216 |
| Sample_SCC55.mb.24cbin.1        | 92.91  | 3.571 | 195 |
| Sample_SCC55.mb.19cbin.1        | 97.31  | 1.006 | 64  |
| Sample_SCC55.Cluster435         | 99.43  | 0.077 | 21  |
| Sample_SCC55.mb.28              | 98.65  | 1.342 | 24  |
| Sample_SCC55.mb.75              | 98.11  | 1.415 | 197 |
| Sample_SCC55.mb.3cbin.1         | 90.72  | 1.373 | 202 |
| Sample_SCC55.mb.66              | 95.94  | 0.000 | 12  |
| Sample_SCC55.mb.29              | 85.90  | 0.000 | 50  |
| Sample_SCC55.Cluster7720cbin.1  | 95.41  | 1.690 | 86  |
| Sample_SCC55.mb.55              | 83.77  | 0.994 | 131 |
| Sample_SCC55.mb.9               | 95.88  | 0.294 | 49  |
| Sample_SCC55.mb.41              | 93.48  | 4.577 | 99  |
| Sample_SCC55.mb.71              | 97.44  | 0.000 | 30  |
| Sample_SCC55.Cluster680cbin.1   | 96.41  | 1.354 | 42  |
| Sample_SCC58.mb.103             | 88.20  | 2.247 | 35  |
| Sample_SCC58.mb.108cbin.1       | 87.92  | 1.123 | 50  |
| Sample_SCC58.mb.31              | 93.82  | 2.407 | 33  |
| Sample_SCC58.Cluster37cbin.1    | 87.63  | 3.411 | 181 |
| Sample_SCC58.Cluster161         | 85.40  | 3.691 | 192 |
| Sample_SCC58.Cluster4392        | 100.00 | 0.115 | 10  |
| Sample_SCC58.mb.17cbin.1        | 93.96  | 0.671 | 153 |
| Sample_SCC58.mb.37cbin.1        | 98.38  | 1.075 | 89  |
| Sample_SCC58.mb.26cbin.1        | 88.70  | 1.881 | 45  |
| Sample_SCC58.Cluster13902cbin.1 | 91.60  | 2.670 | 93  |
| Sample_SCC58.mb.19              | 96.30  | 2.572 | 239 |
| Sample_SCC58.mb.20              | 97.90  | 0.932 | 93  |
| Sample_SCC58.mb.68              | 81.33  | 1.333 | 45  |
| Sample_SCC58.Cluster2946        | 96.15  | 0.961 | 20  |
| Sample_SCC58.Cluster11902cbin.1 | 99.32  | 1.006 | 17  |
| Sample_SCC58.mb.32cbin.1        | 93.95  | 3.355 | 130 |
| Sample_SCC58.mb.83              | 91.57  | 3.370 | 28  |
| Sample_SCC58.mb.109             | 81.73  | 0.000 | 23  |
| Sample_SCC58.mb.66              | 92.26  | 1.342 | 35  |
| Sample_SCC58.mb.63              | 95.33  | 3.225 | 325 |
| Sample_SCC58.Cluster5765cbin.1  | 96.60  | 0.671 | 24  |
| Sample_SCC58.mb.41cbin.1        | 96.94  | 4.957 | 293 |
| Sample_SCC58.mb.74              | 95.44  | 0.806 | 169 |
| Sample_SCC58.Cluster849         | 97.95  | 0.000 | 30  |
| Sample_SCC58.mb.95cbin.1        | 88.84  | 0.806 | 61  |
| Sample_SCC58.mb.80              | 86.12  | 0.000 | 43  |
| Sample_SCC58.mb.106             | 95.63  | 0.894 | 59  |
| Sample_SCC58.mb.79cbin.1        | 93.17  | 3.467 | 137 |
| Sample_SCC58.mb.72              | 91.56  | 2.648 | 208 |
| Sample_SCC58.Cluster10136       | 99.62  | 0.000 | 23  |
| Sample_SCC58.mb.34              | 97.10  | 2.769 | 63  |
| Sample_SCC58.mb.71              | 97.27  | 0.306 | 69  |
| Sample_SCC58.mb.87cbin.1        | 95.62  | 3.817 | 121 |
| Sample_SCC58.mb.78cbin.1        | 90.03  | 2.187 | 287 |
| Sample_SCC58.mb.90              | 95.96  | 1.360 | 238 |
| Sample_SCC58.Cluster4938cbin.1  | 96.75  | 0.993 | 359 |
| Sample_SCC58.Cluster7703cbin.1  | 98.43  | 0.096 | 133 |
| Sample_SCC58.mb.93cbin.1        | 89.70  | 0.000 | 27  |

|                                 |        |       |     |
|---------------------------------|--------|-------|-----|
| Sample_SCC58.mb.101             | 94.24  | 0.375 | 165 |
| Sample_SCC58.Cluster176cbin.1   | 89.17  | 0.949 | 553 |
| Sample_SCC59.mb.27cbin.1        | 83.23  | 1.411 | 288 |
| Sample_SCC59.mb.36              | 95.56  | 0.268 | 86  |
| Sample_SCC59.Cluster7017cbin.1  | 93.54  | 0.115 | 38  |
| Sample_SCC59.mb.12cbin.1        | 97.65  | 3.355 | 205 |
| Sample_SCC59.mb.84              | 81.03  | 1.724 | 208 |
| Sample_SCC59.mb.9               | 92.41  | 2.247 | 21  |
| Sample_SCC59.Cluster16cbin.1    | 91.51  | 2.684 | 262 |
| Sample_SCC59.mb.70cbin.1        | 97.60  | 0.800 | 71  |
| Sample_SCC59.Cluster8562        | 94.63  | 0.000 | 16  |
| Sample_SCC59.mb.93              | 89.91  | 1.342 | 35  |
| Sample_SCC59.mb.34              | 93.01  | 3.635 | 108 |
| Sample_SCC59.Cluster3093cbin.1  | 97.27  | 2.684 | 23  |
| Sample_SCC59.mb.48              | 96.31  | 0.000 | 58  |
| Sample_SCC59.Cluster9725        | 99.32  | 0.671 | 22  |
| Sample_SCC59.mb.24              | 100.00 | 0.000 | 20  |
| Sample_SCC59.mb.47cbin.1        | 81.09  | 2.348 | 377 |
| Sample_SCC59.mb.33              | 97.59  | 2.403 | 38  |
| Sample_SCC59.mb.87              | 84.89  | 1.875 | 287 |
| Sample_SCC59.mb.90              | 91.94  | 1.342 | 22  |
| Sample_SCC59.Cluster6670cbin.1  | 96.77  | 0.335 | 189 |
| Sample_SCC59.mb.10              | 94.73  | 1.988 | 129 |
| Sample_SCC59.Cluster4295cbin.1  | 92.53  | 2.664 | 222 |
| Sample_SCC59.mb.71cbin.1        | 100.00 | 0.000 | 160 |
| Sample_SCC59.Cluster6696cbin.1  | 97.50  | 1.282 | 272 |
| Sample_SCC60.Cluster16100       | 94.94  | 2.407 | 31  |
| Sample_SCC60.Cluster16043cbin.1 | 89.32  | 2.247 | 80  |
| Sample_SCC60.Cluster13861       | 97.75  | 0.000 | 61  |
| Sample_SCC60.mb.14              | 92.40  | 1.398 | 42  |
| Sample_SCC60.mb.32              | 97.33  | 0.000 | 85  |
| Sample_SCC60.mb.12              | 85.63  | 1.062 | 285 |
| Sample_SCC60.Cluster214cbin.1   | 92.13  | 0.806 | 220 |
| Sample_SCC60.mb.31              | 92.89  | 2.521 | 185 |
| Sample_SCC60.mb.56              | 96.37  | 2.419 | 108 |
| Sample_SCC60.mb.10              | 89.96  | 2.852 | 206 |
| Sample_SCC60.Cluster15816       | 100.00 | 0.061 | 15  |
| Sample_SCC60.Cluster12433       | 98.65  | 0.000 | 21  |
| Sample_SCC60.mb.24cbin.1        | 95.30  | 0.083 | 59  |
| Sample_SCC60.mb.65              | 97.90  | 1.165 | 88  |
| Sample_SCC60.mb.43              | 82.54  | 3.645 | 427 |
| Sample_SCC60.Cluster11285cbin.1 | 97.31  | 0.335 | 39  |
| Sample_SCC60.Cluster12028       | 99.32  | 0.000 | 23  |
| Sample_SCC60.Cluster236         | 97.95  | 0.000 | 25  |
| Sample_SCC60.mb.57              | 87.27  | 2.034 | 284 |
| Sample_SCC60.mb.28              | 92.09  | 1.003 | 172 |
| Sample_SCC60.mb.21              | 92.28  | 0.020 | 176 |
| Sample_SCC60.mb.51              | 93.91  | 4.093 | 114 |
| Sample_SCC60.mb.35cbin.1        | 87.58  | 1.342 | 56  |
| Sample_SCC60.mb.2               | 94.71  | 0.480 | 99  |
| Sample_SCC60.mb.76              | 93.73  | 0.000 | 34  |
| Sample_SCC60.mb.60              | 85.18  | 1.342 | 106 |
| Sample_SCC60.mb.48cbin.1        | 93.28  | 4.474 | 152 |
| Sample_SCC60.mb.45cbin.1        | 97.46  | 0.000 | 82  |
| Sample_SCC60.mb.64cbin.1        | 96.59  | 0.680 | 219 |
| Sample_SCC60.mb.84cbin.1        | 98.43  | 3.355 | 110 |
| Sample_SCC60.Cluster9124cbin.1  | 95.84  | 0.000 | 31  |
| Sample_SCC60.mb.67              | 95.59  | 0.671 | 31  |

|                                |        |       |     |
|--------------------------------|--------|-------|-----|
| Sample_SCC60.mb.87             | 93.28  | 0.000 | 41  |
| Sample_SCC60.mb.99             | 93.89  | 0.000 | 42  |
| Sample_SCC60.Cluster5145cbin.1 | 97.84  | 0.000 | 224 |
| Sample_SCC60.mb.13             | 91.73  | 4.746 | 177 |
| Sample_SCC60.mb.9              | 94.59  | 1.351 | 83  |
| Sample_SCC60.mb.75cbin.1       | 88.43  | 2.144 | 170 |
| Sample_SCC60.mb.86cbin.1       | 97.59  | 1.442 | 31  |
| Sample_SCC60.mb.81             | 91.05  | 1.342 | 102 |
| Sample_SCC60.Cluster6558cbin.1 | 93.00  | 4.770 | 144 |
| Sample_SCC60.mb.93             | 97.42  | 1.449 | 37  |
| Sample_SCC61.mb.33             | 95.69  | 0.000 | 58  |
| Sample_SCC61.Cluster4039       | 93.93  | 0.335 | 52  |
| Sample_SCC61.mb.94             | 82.45  | 2.631 | 139 |
| Sample_SCC61.mb.29cbin.1       | 95.97  | 3.020 | 191 |
| Sample_SCC61.Cluster213cbin.1  | 85.99  | 0.160 | 305 |
| Sample_SCC61.mb.79cbin.1       | 91.27  | 0.671 | 11  |
| Sample_SCC61.mb.12cbin.1       | 81.73  | 4.478 | 268 |
| Sample_SCC61.mb.42             | 92.30  | 0.632 | 210 |
| Sample_SCC61.mb.53cbin.1       | 97.67  | 0.949 | 43  |
| Sample_SCC61.Cluster175        | 100.00 | 0.480 | 29  |
| Sample_SCC61.Cluster3441cbin.1 | 87.42  | 1.481 | 140 |
| Sample_SCC61.mb.13             | 84.78  | 0.510 | 122 |
| Sample_SCC61.Cluster307cbin.1  | 97.95  | 0.000 | 27  |
| Sample_SCC61.Cluster4758cbin.1 | 99.32  | 0.671 | 19  |
| Sample_SCC61.Cluster3659       | 98.65  | 0.000 | 17  |
| Sample_SCC61.Cluster620        | 96.87  | 0.000 | 34  |
| Sample_SCC61.mb.32             | 95.25  | 3.164 | 105 |
| Sample_SCC61.mb.68             | 87.16  | 0.000 | 81  |
| Sample_SCC61.mb.69cbin.1       | 97.10  | 1.449 | 52  |
| Sample_SCC61.mb.23cbin.1       | 91.47  | 4.081 | 122 |
| Sample_SCC61.mb.78cbin.1       | 97.18  | 0.000 | 66  |
| Sample_SCC61.mb.92cbin.1       | 81.07  | 2.844 | 293 |
| Sample_SCC61.Cluster6030cbin.1 | 98.65  | 1.342 | 81  |
| Sample_SCC61.Cluster4061cbin.1 | 91.54  | 3.880 | 185 |
| Sample_SCC61.Cluster3270cbin.1 | 91.45  | 0.604 | 383 |
| Sample_SCC61.mb.85cbin.1       | 94.71  | 0.000 | 202 |
| Sample_SCC61.mb.41cbin.1       | 89.76  | 1.177 | 213 |
| Sample_SCC61.Cluster2650cbin.1 | 95.64  | 3.846 | 154 |
| Sample_SCC61.Cluster3036cbin.1 | 98.65  | 0.576 | 34  |
| Sample_SCC61.Cluster1752       | 97.69  | 0.682 | 138 |
| Sample_SCC64.mb.26             | 92.93  | 1.342 | 31  |
| Sample_SCC64.mb.22             | 96.32  | 1.165 | 72  |
| Sample_SCC64.Cluster3622cbin.1 | 96.97  | 0.000 | 53  |
| Sample_SCC64.mb.52cbin.1       | 86.55  | 3.137 | 256 |
| Sample_SCC64.mb.25             | 90.38  | 0.230 | 312 |
| Sample_SCC64.Cluster662cbin.1  | 85.24  | 0.632 | 335 |
| Sample_SCC64.Cluster61cbin.1   | 96.70  | 0.912 | 102 |
| Sample_SCC64.Cluster5107       | 97.31  | 0.671 | 25  |
| Sample_SCC64.Cluster7354cbin.1 | 93.08  | 0.471 | 117 |
| Sample_SCC64.Cluster276cbin.1  | 92.61  | 0.292 | 66  |
| Sample_SCC64.mb.13cbin.1       | 92.78  | 1.442 | 83  |
| Sample_SCC64.mb.11             | 97.23  | 0.000 | 36  |
| Sample_SCC64.Cluster820        | 98.75  | 0.625 | 26  |
| Sample_SCC64.Cluster6936cbin.1 | 93.24  | 0.000 | 19  |
| Sample_SCC64.mb.63             | 93.27  | 0.671 | 123 |
| Sample_SCC64.mb.18             | 97.44  | 0.000 | 73  |
| Sample_SCC64.mb.79             | 99.51  | 1.442 | 34  |
| Sample_SCC64.mb.67             | 99.51  | 4.106 | 74  |

|                                |        |       |     |
|--------------------------------|--------|-------|-----|
| Sample_SCC64.Cluster2663       | 80.29  | 0.000 | 40  |
| Sample_SCC64.Cluster7245       | 100.00 | 0.632 | 67  |
| Sample_SCC64.mb.43cbin.1       | 97.03  | 1.700 | 88  |
| Sample_SCC64.mb.54             | 96.68  | 4.739 | 39  |
| Sample_SCC64.mb.45             | 97.06  | 0.105 | 244 |
| Sample_SCC64.mb.24             | 91.66  | 0.901 | 94  |
| Sample_SCC64.mb.38             | 98.86  | 1.509 | 27  |
| Sample_SCC64.mb.47cbin.1       | 99.27  | 0.030 | 126 |
| Sample_SCC64.Cluster2242       | 97.69  | 0.000 | 69  |
| Sample_SCC64.Cluster3650cbin.1 | 91.03  | 1.971 | 150 |
| Sample_SCC64.Cluster3045       | 96.15  | 0.512 | 38  |
| Sample_SCC64.mb.46cbin.1       | 92.82  | 2.137 | 155 |
| Sample_SCC64.mb.29             | 90.55  | 1.115 | 56  |
| Sample_SCC65.Cluster2480cbin.1 | 97.84  | 0.000 | 35  |
| Sample_SCC65.mb.51cbin.1       | 98.27  | 4.075 | 36  |
| Sample_SCC65.Cluster781cbin.1  | 91.64  | 2.684 | 344 |
| Sample_SCC65.mb.22             | 97.31  | 1.677 | 68  |
| Sample_SCC65.mb.32             | 97.58  | 0.518 | 74  |
| Sample_SCC65.Cluster2641       | 91.98  | 2.531 | 35  |
| Sample_SCC65.mb.7cbin.1        | 85.82  | 1.486 | 320 |
| Sample_SCC65.Cluster5070       | 96.94  | 2.190 | 31  |
| Sample_SCC65.mb.69cbin.1       | 83.32  | 1.586 | 353 |
| Sample_SCC65.Cluster520        | 97.75  | 0.961 | 26  |
| Sample_SCC65.mb.2              | 83.99  | 0.907 | 394 |
| Sample_SCC65.Cluster5719       | 96.30  | 0.335 | 25  |
| Sample_SCC65.mb.70cbin.1       | 91.27  | 0.000 | 38  |
| Sample_SCC65.mb.58cbin.1       | 85.26  | 4.026 | 372 |
| Sample_SCC65.Cluster13cbin.1   | 100.00 | 1.075 | 84  |
| Sample_SCC65.mb.33cbin.1       | 99.32  | 0.000 | 27  |
| Sample_SCC65.Cluster6213cbin.1 | 95.30  | 0.335 | 57  |
| Sample_SCC65.mb.45             | 94.72  | 1.285 | 47  |
| Sample_SCC65.mb.77cbin.1       | 96.04  | 1.554 | 132 |
| Sample_SCC65.mb.28             | 100.00 | 0.105 | 139 |
| Sample_SCC65.mb.53cbin.1       | 81.70  | 0.483 | 665 |
| Sample_SCC65.mb.42cbin.1       | 91.60  | 0.939 | 171 |
| Sample_SCC65.Cluster3329cbin.1 | 95.91  | 0.000 | 46  |
| Sample_SCC65.mb.16             | 98.77  | 0.705 | 161 |
| Sample_SCC65.mb.52             | 93.68  | 0.631 | 63  |
| Sample_SCC66.Cluster3790       | 95.85  | 0.806 | 21  |
| Sample_SCC66.Cluster1441cbin.1 | 98.60  | 1.515 | 89  |
| Sample_SCC66.mb.15             | 92.69  | 2.247 | 20  |
| Sample_SCC66.Cluster294cbin.1  | 93.28  | 3.355 | 130 |
| Sample_SCC66.Cluster2799cbin.1 | 82.56  | 1.497 | 259 |
| Sample_SCC66.Cluster8cbin.1    | 91.42  | 2.146 | 260 |
| Sample_SCC66.mb.118            | 95.97  | 0.000 | 49  |
| Sample_SCC66.Cluster6670cbin.1 | 91.46  | 1.932 | 218 |
| Sample_SCC66.mb.6cbin.1        | 92.56  | 1.612 | 223 |
| Sample_SCC66.Cluster438        | 97.95  | 0.000 | 19  |
| Sample_SCC66.Cluster8261cbin.1 | 99.32  | 0.335 | 21  |
| Sample_SCC66.mb.57cbin.1       | 80.79  | 1.282 | 213 |
| Sample_SCC66.Cluster8780       | 93.26  | 0.805 | 120 |
| Sample_SCC66.mb.33             | 93.26  | 0.961 | 28  |
| Sample_SCC66.mb.54             | 99.18  | 0.000 | 31  |
| Sample_SCC66.Cluster5669cbin.1 | 80.12  | 4.975 | 364 |
| Sample_SCC66.Cluster1357       | 92.54  | 0.000 | 39  |
| Sample_SCC66.Cluster1223cbin.1 | 93.87  | 0.480 | 27  |
| Sample_SCC66.mb.32cbin.1       | 95.52  | 3.061 | 286 |
| Sample_SCC66.mb.90cbin.1       | 90.60  | 0.000 | 122 |



|                                 |       |       |     |
|---------------------------------|-------|-------|-----|
| Sample_SCC66.mb.114cbin.1       | 98.65 | 1.342 | 90  |
| Sample_SCC66.mb.87              | 97.25 | 1.054 | 145 |
| Sample_SCC66.mb.109cbin.1       | 99.31 | 0.000 | 60  |
| Sample_SCC66.mb.107cbin.1       | 95.67 | 1.265 | 198 |
| Sample_SCC66.Cluster5209        | 98.92 | 0.000 | 132 |
| Sample_SCC66.mb.100             | 91.25 | 2.788 | 118 |
| Sample_SCC66.mb.97cbin.1        | 97.31 | 0.000 | 20  |
| Sample_SCC66.mb.27              | 90.43 | 0.833 | 43  |
| Sample_SCC66.mb.2cbin.1         | 97.81 | 1.368 | 168 |
| Sample_SCC66.mb.88cbin.1        | 97.98 | 1.342 | 21  |
| Sample_SCC66.Cluster4739cbin.1  | 99.61 | 0.384 | 92  |
| Sample_SCC66.mb.82cbin.1        | 98.84 | 2.572 | 127 |
| Sample_SCC66.mb.86              | 91.48 | 2.884 | 79  |
| Sample_SCC66.mb.7               | 99.62 | 0.000 | 15  |
| Sample_SCC67.Cluster4189cbin.1  | 93.00 | 0.699 | 103 |
| Sample_SCC67.mb.12              | 93.33 | 0.000 | 39  |
| Sample_SCC67.Cluster3149cbin.1  | 80.15 | 0.000 | 145 |
| Sample_SCC67.Cluster11226cbin.1 | 92.28 | 0.000 | 55  |
| Sample_SCC67.mb.14              | 97.31 | 1.006 | 23  |
| Sample_SCC67.mb.114             | 95.99 | 2.348 | 170 |
| Sample_SCC67.mb.126             | 89.54 | 0.488 | 80  |
| Sample_SCC67.mb.69              | 83.92 | 3.225 | 290 |
| Sample_SCC67.mb.28              | 85.77 | 2.348 | 92  |
| Sample_SCC67.Cluster15193cbin.1 | 99.32 | 0.209 | 26  |
| Sample_SCC67.Cluster11439       | 97.09 | 0.000 | 20  |
| Sample_SCC67.mb.55cbin.1        | 88.57 | 0.245 | 236 |
| Sample_SCC67.Cluster15443       | 98.65 | 0.335 | 48  |
| Sample_SCC67.mb.105cbin.1       | 97.03 | 0.370 | 67  |
| Sample_SCC67.Cluster8360cbin.1  | 98.05 | 0.000 | 63  |
| Sample_SCC67.Cluster45cbin.1    | 93.86 | 2.500 | 332 |
| Sample_SCC67.mb.35              | 88.75 | 1.342 | 51  |
| Sample_SCC67.Cluster8834cbin.1  | 91.56 | 1.443 | 250 |
| Sample_SCC67.mb.26cbin.1        | 87.61 | 0.160 | 402 |
| Sample_SCC67.Cluster15804cbin.1 | 99.72 | 1.137 | 107 |
| Sample_SCC67.Cluster11250       | 85.37 | 2.189 | 498 |
| Sample_SCC67.mb.18              | 92.29 | 2.040 | 241 |
| Sample_SCC67.mb.5cbin.1         | 90.60 | 3.304 | 67  |
| Sample_SCC67.mb.62              | 86.55 | 4.854 | 350 |
| Sample_SCC67.mb.101cbin.1       | 99.32 | 0.671 | 24  |
| Sample_SCC67.Cluster12373cbin.1 | 99.38 | 1.159 | 143 |
| Sample_SCC67.mb.2               | 91.85 | 0.194 | 104 |
| Sample_SCC67.mb.45              | 87.18 | 0.671 | 239 |
| Sample_SCC67.mb.75              | 94.63 | 0.000 | 36  |
| Sample_SCC67.mb.52cbin.1        | 94.70 | 1.454 | 176 |
| Sample_SCC67.mb.103             | 97.31 | 0.671 | 217 |
| Sample_SCC67.mb.73cbin.1        | 95.01 | 1.845 | 202 |
| Sample_SCC67.mb.97cbin.1        | 89.73 | 1.677 | 70  |
| Sample_SCC67.mb.131             | 99.62 | 0.577 | 59  |
| Sample_SCC67.mb.90cbin.1        | 94.24 | 1.419 | 228 |
| Sample_SCC67.mb.63              | 80.55 | 2.534 | 366 |
| Sample_SCC67.mb.95cbin.1        | 98.07 | 1.923 | 36  |
| Sample_SCC67.mb.77cbin.1        | 93.65 | 3.366 | 207 |
| Sample_SCC67.mb.74cbin.1        | 98.63 | 1.369 | 79  |
| Sample_SCC68.mb.39              | 88.76 | 4.032 | 251 |
| Sample_SCC68.mb.17              | 91.60 | 0.932 | 71  |
| Sample_SCC68.Cluster3923        | 93.26 | 1.677 | 27  |
| Sample_SCC68.mb.58              | 91.57 | 1.123 | 17  |
| Sample_SCC68.mb.23cbin.1        | 80.73 | 0.671 | 230 |

|                                |        |       |     |
|--------------------------------|--------|-------|-----|
| Sample_SCC68.mb.22cbin.1       | 83.65  | 2.819 | 512 |
| Sample_SCC68.Cluster829cbin.1  | 90.93  | 4.530 | 64  |
| Sample_SCC68.mb.38             | 93.56  | 0.335 | 125 |
| Sample_SCC68.Cluster193cbin.1  | 81.73  | 0.671 | 56  |
| Sample_SCC68.mb.33             | 83.49  | 1.571 | 292 |
| Sample_SCC68.mb.18             | 85.90  | 0.000 | 115 |
| Sample_SCC68.Cluster4067cbin.1 | 96.66  | 0.380 | 138 |
| Sample_SCC68.mb.41             | 96.14  | 0.000 | 81  |
| Sample_SCC68.mb.61             | 93.95  | 0.671 | 48  |
| Sample_SCC68.mb.72cbin.1       | 100.00 | 0.111 | 60  |
| Sample_SCC68.Cluster6989cbin.1 | 80.47  | 0.457 | 367 |
| Sample_SCC68.mb.45cbin.1       | 89.59  | 3.355 | 179 |
| Sample_SCC68.mb.50             | 94.59  | 2.027 | 78  |
| Sample_SCC68.mb.19cbin.1       | 98.55  | 0.619 | 43  |
| Sample_SCC68.mb.28cbin.1       | 98.73  | 0.632 | 107 |
| Sample_SCC68.mb.35             | 96.64  | 1.454 | 175 |
| Sample_SCC68.Cluster9019cbin.1 | 84.81  | 2.516 | 463 |
| Sample_SCC68.mb.68cbin.1       | 83.22  | 3.355 | 59  |
| Sample_SCC68.mb.1              | 97.09  | 0.020 | 28  |
| Sample_SCC68.mb.44cbin.1       | 96.60  | 1.006 | 27  |
| Sample_SCC68.Cluster9947cbin.1 | 98.94  | 0.000 | 27  |
| Sample_SCC68.mb.59cbin.1       | 94.63  | 1.342 | 147 |
| Sample_SCC68.mb.66             | 96.86  | 0.335 | 59  |
| Sample_SCC68.mb.60             | 96.15  | 0.961 | 52  |
| Sample_SCC68.mb.20             | 99.51  | 0.966 | 96  |
| Sample_SCC68.mb.10             | 92.93  | 1.115 | 81  |
| Sample_SCC68.mb.49             | 98.49  | 2.464 | 184 |
| Sample_SCC68.mb.24cbin.1       | 96.67  | 1.144 | 257 |
| Sample_SCC69.mb.31             | 97.58  | 0.806 | 45  |
| Sample_SCC69.mb.56cbin.1       | 99.19  | 1.075 | 138 |
| Sample_SCC69.mb.37             | 99.30  | 0.932 | 87  |
| Sample_SCC69.Cluster248cbin.1  | 86.40  | 0.671 | 39  |
| Sample_SCC69.Cluster2319cbin.1 | 88.92  | 1.447 | 39  |
| Sample_SCC69.mb.28cbin.1       | 99.19  | 1.612 | 31  |
| Sample_SCC69.mb.15cbin.1       | 92.73  | 2.531 | 431 |
| Sample_SCC69.mb.29             | 92.42  | 0.000 | 42  |
| Sample_SCC69.Cluster3524cbin.1 | 93.95  | 0.671 | 41  |
| Sample_SCC69.mb.34cbin.1       | 84.36  | 1.363 | 405 |
| Sample_SCC69.mb.57             | 84.44  | 0.080 | 45  |
| Sample_SCC69.mb.30cbin.1       | 86.57  | 3.859 | 40  |
| Sample_SCC69.mb.32             | 84.16  | 1.363 | 320 |
| Sample_SCC69.mb.22cbin.1       | 98.38  | 2.419 | 90  |
| Sample_SCC69.Cluster3324cbin.1 | 99.30  | 1.265 | 103 |
| Sample_SCC69.Cluster10971      | 100.00 | 0.000 | 25  |
| Sample_SCC69.Cluster10644      | 86.71  | 2.770 | 283 |
| Sample_SCC69.mb.67             | 89.91  | 1.677 | 21  |
| Sample_SCC69.Cluster525cbin.1  | 90.45  | 0.681 | 24  |
| Sample_SCC69.Cluster1876       | 99.38  | 0.598 | 32  |
| Sample_SCC69.mb.25cbin.1       | 94.72  | 0.709 | 278 |
| Sample_SCC69.mb.62             | 87.69  | 0.000 | 51  |
| Sample_SCC69.mb.46cbin.1       | 87.79  | 0.184 | 261 |
| Sample_SCC69.Cluster9042cbin.1 | 97.82  | 0.000 | 88  |
| Sample_SCC69.mb.35             | 97.84  | 0.230 | 108 |
| Sample_SCC69.mb.68cbin.1       | 88.92  | 2.013 | 27  |
| Sample_SCC69.mb.55             | 94.54  | 0.460 | 25  |
| Sample_SCC69.Cluster6823cbin.1 | 97.63  | 1.388 | 121 |
| Sample_SCC69.mb.21             | 99.62  | 0.377 | 33  |
| Sample_SCC69.Cluster5299cbin.1 | 89.24  | 3.763 | 520 |

|                                 |        |       |     |
|---------------------------------|--------|-------|-----|
| Sample_SCC69.mb.58cbin.1        | 80.89  | 2.777 | 98  |
| Sample_SCC69.mb.70cbin.1        | 90.62  | 4.697 | 21  |
| Sample_SCC69.mb.52cbin.1        | 97.75  | 4.996 | 272 |
| Sample_SCC69.mb.60              | 98.73  | 0.632 | 70  |
| Sample_SCC69.mb.9               | 93.26  | 1.923 | 97  |
| Sample_SCC69.mb.75              | 98.65  | 0.671 | 27  |
| Sample_SCC69.mb.83              | 87.55  | 3.196 | 306 |
| Sample_SCC69.mb.69              | 97.25  | 1.559 | 182 |
| Sample_SCC69.mb.43cbin.1        | 90.56  | 1.995 | 162 |
| Sample_SCC69.mb.72cbin.1        | 93.30  | 0.000 | 47  |
| Sample_SCC69.mb.81cbin.1        | 93.42  | 0.601 | 112 |
| Sample_SCC69.Cluster668cbin.1   | 96.34  | 2.976 | 127 |
| Sample_SCC69.mb.7cbin.1         | 97.70  | 4.717 | 299 |
| Sample_SCC70.mb.18              | 93.82  | 1.284 | 20  |
| Sample_SCC70.Cluster7894        | 91.93  | 0.699 | 3   |
| Sample_SCC70.mb.33              | 88.48  | 1.404 | 38  |
| Sample_SCC70.Cluster12265cbin.1 | 98.65  | 0.000 | 25  |
| Sample_SCC70.mb.26              | 93.54  | 0.000 | 55  |
| Sample_SCC70.Cluster1298cbin.1  | 92.28  | 0.000 | 88  |
| Sample_SCC70.mb.49              | 96.62  | 1.123 | 11  |
| Sample_SCC70.Cluster4194cbin.1  | 80.54  | 1.486 | 454 |
| Sample_SCC70.mb.60              | 87.64  | 0.000 | 31  |
| Sample_SCC70.mb.15cbin.1        | 86.01  | 0.671 | 83  |
| Sample_SCC70.mb.110cbin.1       | 89.81  | 1.342 | 74  |
| Sample_SCC70.Cluster6984        | 90.86  | 0.966 | 62  |
| Sample_SCC70.Cluster6586        | 100.00 | 0.898 | 40  |
| Sample_SCC70.mb.28              | 93.17  | 0.634 | 97  |
| Sample_SCC70.Cluster12184       | 96.24  | 0.335 | 34  |
| Sample_SCC70.mb.69cbin.1        | 87.45  | 1.075 | 240 |
| Sample_SCC70.mb.48              | 82.48  | 1.006 | 177 |
| Sample_SCC70.Cluster8175cbin.1  | 98.24  | 0.185 | 111 |
| Sample_SCC70.mb.16              | 95.30  | 0.335 | 59  |
| Sample_SCC70.mb.58              | 95.10  | 4.778 | 230 |
| Sample_SCC70.Cluster4154        | 97.04  | 0.000 | 32  |
| Sample_SCC70.Cluster9642cbin.1  | 99.32  | 0.000 | 43  |
| Sample_SCC70.mb.105             | 100.00 | 0.000 | 25  |
| Sample_SCC70.Cluster12153cbin.1 | 97.09  | 0.000 | 42  |
| Sample_SCC70.mb.34              | 81.42  | 0.791 | 60  |
| Sample_SCC70.mb.20cbin.1        | 95.97  | 2.834 | 69  |
| Sample_SCC70.Cluster6180        | 84.98  | 2.082 | 199 |
| Sample_SCC70.Cluster11577cbin.1 | 98.87  | 0.724 | 159 |
| Sample_SCC70.mb.78cbin.1        | 98.65  | 0.671 | 17  |
| Sample_SCC70.mb.91cbin.1        | 85.52  | 1.075 | 211 |
| Sample_SCC70.mb.102             | 94.63  | 0.671 | 169 |
| Sample_SCC70.Cluster6980cbin.1  | 96.99  | 3.437 | 179 |
| Sample_SCC70.mb.50              | 90.90  | 1.360 | 337 |
| Sample_SCC70.mb.71              | 84.64  | 1.067 | 80  |
| Sample_SCC70.mb.109cbin.1       | 97.54  | 0.000 | 53  |
| Sample_SCC70.mb.52cbin.1        | 80.59  | 1.183 | 385 |
| Sample_SCC70.mb.77              | 93.07  | 4.530 | 190 |
| Sample_SCC70.mb.85              | 98.12  | 0.000 | 106 |
| Sample_SCC70.mb.40              | 84.13  | 0.566 | 343 |
| Sample_SCC70.mb.97              | 88.68  | 4.718 | 81  |
| Sample_SCC70.mb.76cbin.1        | 98.55  | 0.000 | 65  |
| Sample_SCC70.mb.81              | 97.06  | 3.043 | 105 |
| Sample_SCC70.mb.93cbin.1        | 97.31  | 0.671 | 71  |
| Sample_SCC70.mb.88              | 95.97  | 0.000 | 23  |
| Sample_SCC70.mb.92              | 94.66  | 1.858 | 120 |

|                                 |        |       |     |
|---------------------------------|--------|-------|-----|
| Sample_SPA03.Cluster14037cbin.1 | 92.69  | 3.370 | 16  |
| Sample_SPA03.Cluster11746cbin.1 | 99.32  | 0.000 | 21  |
| Sample_SPA03.mb.22              | 89.88  | 0.000 | 32  |
| Sample_SPA03.Cluster260cbin.1   | 91.27  | 1.342 | 59  |
| Sample_SPA03.Cluster4871cbin.1  | 91.23  | 2.215 | 43  |
| Sample_SPA03.mb.116             | 96.97  | 0.671 | 129 |
| Sample_SPA03.mb.39              | 97.84  | 0.097 | 50  |
| Sample_SPA03.Cluster8013cbin.1  | 99.10  | 2.684 | 138 |
| Sample_SPA03.Cluster1587        | 87.98  | 0.480 | 39  |
| Sample_SPA03.mb.23cbin.1        | 99.30  | 3.962 | 90  |
| Sample_SPA03.Cluster3083cbin.1  | 95.82  | 1.445 | 139 |
| Sample_SPA03.mb.18              | 97.15  | 1.845 | 154 |
| Sample_SPA03.Cluster3223cbin.1  | 86.87  | 1.301 | 41  |
| Sample_SPA03.Cluster35          | 97.98  | 1.552 | 103 |
| Sample_SPA03.mb.35              | 95.63  | 0.000 | 174 |
| Sample_SPA03.Cluster8475cbin.1  | 99.32  | 0.000 | 22  |
| Sample_SPA03.mb.118             | 90.05  | 1.006 | 129 |
| Sample_SPA03.mb.119cbin.1       | 100.00 | 2.403 | 46  |
| Sample_SPA03.mb.24              | 92.30  | 1.190 | 170 |
| Sample_SPA03.mb.2               | 94.40  | 1.006 | 133 |
| Sample_SPA03.mb.38              | 92.05  | 4.347 | 262 |
| Sample_SPA03.Cluster453cbin.1   | 92.52  | 2.691 | 362 |
| Sample_SPA03.mb.66cbin.1        | 97.98  | 0.335 | 120 |
| Sample_SPA03.mb.11              | 98.02  | 0.480 | 23  |
| Sample_SPA03.mb.50cbin.1        | 91.47  | 2.348 | 187 |
| Sample_SPA03.mb.19              | 98.65  | 2.013 | 25  |
| Sample_SPA03.Cluster6910cbin.1  | 99.62  | 0.000 | 12  |
| Sample_SPA03.mb.62cbin.1        | 88.79  | 3.612 | 74  |
| Sample_SPA03.mb.27              | 89.62  | 1.363 | 79  |
| Sample_SPA03.Cluster6052cbin.1  | 95.69  | 2.916 | 260 |
| Sample_SPA03.mb.93              | 94.94  | 1.845 | 144 |
| Sample_SPA03.mb.51cbin.1        | 93.02  | 4.761 | 256 |
| Sample_SPA03.mb.54              | 93.62  | 4.421 | 90  |
| Sample_SPA03.mb.69              | 90.20  | 3.947 | 125 |
| Sample_SPA03.mb.92cbin.1        | 98.99  | 0.000 | 45  |
| Sample_SPA03.mb.7               | 97.31  | 0.000 | 10  |
| Sample_SPA03.Cluster6964cbin.1  | 94.53  | 3.392 | 100 |
| Sample_SPA03.Cluster5354        | 97.17  | 2.884 | 76  |
| Sample_SPA03.mb.64              | 83.30  | 0.955 | 470 |
| Sample_SPA03.mb.77              | 93.75  | 0.000 | 34  |
| Sample_SPA03.Cluster5960        | 98.39  | 0.000 | 60  |
| Sample_SPA03.mb.98              | 97.94  | 4.026 | 89  |
| Sample_SPA03.mb.90              | 96.05  | 0.000 | 55  |
| Sample_SPA03.mb.40              | 91.75  | 0.375 | 147 |
| Sample_SPA03.mb.47cbin.1        | 99.10  | 1.953 | 120 |
| Sample_SPA04.Cluster15261cbin.1 | 82.05  | 1.754 | 157 |
| Sample_SPA04.mb.17              | 89.04  | 2.247 | 25  |
| Sample_SPA04.Cluster368cbin.1   | 96.64  | 1.531 | 70  |
| Sample_SPA04.Cluster7492cbin.1  | 98.65  | 1.677 | 125 |
| Sample_SPA04.mb.14cbin.1        | 90.58  | 1.342 | 29  |
| Sample_SPA04.Cluster1305cbin.1  | 93.89  | 0.961 | 93  |
| Sample_SPA04.Cluster6010cbin.1  | 92.99  | 1.932 | 106 |
| Sample_SPA04.Cluster1798cbin.1  | 90.00  | 0.625 | 87  |
| Sample_SPA04.Cluster5326        | 96.40  | 1.097 | 33  |
| Sample_SPA04.mb.42              | 90.66  | 1.333 | 26  |
| Sample_SPA04.Cluster12575       | 97.98  | 0.671 | 20  |
| Sample_SPA04.Cluster88          | 98.32  | 1.342 | 49  |
| Sample_SPA04.Cluster13556       | 98.53  | 0.671 | 42  |

|                                 |        |       |     |
|---------------------------------|--------|-------|-----|
| Sample_SPA04.Cluster13447cbin.1 | 99.36  | 0.656 | 46  |
| Sample_SPA04.mb.102             | 94.47  | 1.682 | 87  |
| Sample_SPA04.Cluster14222       | 80.09  | 1.305 | 410 |
| Sample_SPA04.mb.119cbin.1       | 88.82  | 4.697 | 200 |
| Sample_SPA04.mb.46              | 88.12  | 0.949 | 310 |
| Sample_SPA04.mb.115cbin.1       | 97.16  | 0.000 | 77  |
| Sample_SPA04.mb.79cbin.1        | 97.17  | 0.806 | 39  |
| Sample_SPA04.mb.31              | 98.38  | 0.000 | 74  |
| Sample_SPA04.mb.89              | 89.51  | 0.894 | 226 |
| Sample_SPA04.mb.71cbin.1        | 92.61  | 2.125 | 66  |
| Sample_SPA04.mb.61              | 87.42  | 0.000 | 132 |
| Sample_SPA04.mb.29              | 88.69  | 2.224 | 180 |
| Sample_SPA04.mb.5               | 93.60  | 3.061 | 132 |
| Sample_SPA04.mb.2               | 92.80  | 3.605 | 34  |
| Sample_SPA04.mb.85              | 100.00 | 0.115 | 16  |
| Sample_SPA04.mb.73cbin.1        | 95.83  | 2.684 | 110 |
| Sample_SPA04.mb.26              | 89.47  | 0.610 | 58  |
| Sample_SPA04.mb.88cbin.1        | 94.19  | 0.632 | 139 |
| Sample_SPA04.mb.57              | 96.93  | 0.000 | 18  |
| Sample_SPA04.mb.53cbin.1        | 98.38  | 2.403 | 48  |
| Sample_SPA04.mb.94              | 84.49  | 4.641 | 115 |
| Sample_SPA04.mb.43cbin.1        | 92.27  | 4.504 | 359 |
| Sample_SPA04.mb.75              | 87.90  | 1.708 | 130 |
| Sample_SPA04.mb.64cbin.1        | 97.43  | 1.666 | 165 |
| Sample_SPA06.Cluster13396       | 88.00  | 0.000 | 20  |
| Sample_SPA06.Cluster2511cbin.1  | 91.25  | 1.748 | 51  |
| Sample_SPA06.Cluster6148        | 100.00 | 0.000 | 24  |
| Sample_SPA06.Cluster317cbin.1   | 95.13  | 2.013 | 79  |
| Sample_SPA06.Cluster781         | 97.20  | 0.932 | 74  |
| Sample_SPA06.Cluster4378cbin.1  | 97.31  | 0.000 | 39  |
| Sample_SPA06.Cluster178cbin.1   | 96.30  | 0.671 | 43  |
| Sample_SPA06.Cluster476cbin.1   | 92.61  | 3.020 | 64  |
| Sample_SPA06.Cluster442         | 98.38  | 0.806 | 28  |
| Sample_SPA06.Cluster1690cbin.1  | 95.63  | 0.000 | 12  |
| Sample_SPA06.Cluster528cbin.1   | 89.93  | 2.348 | 82  |
| Sample_SPA06.mb.117             | 93.93  | 1.342 | 20  |
| Sample_SPA06.Cluster2162        | 97.27  | 0.000 | 24  |
| Sample_SPA06.Cluster346cbin.1   | 97.83  | 0.000 | 87  |
| Sample_SPA06.Cluster465cbin.1   | 100.00 | 0.268 | 34  |
| Sample_SPA06.mb.20              | 90.66  | 1.333 | 41  |
| Sample_SPA06.Cluster341cbin.1   | 96.59  | 0.226 | 62  |
| Sample_SPA06.mb.26              | 92.69  | 3.370 | 17  |
| Sample_SPA06.Cluster12015       | 93.95  | 0.000 | 25  |
| Sample_SPA06.mb.119             | 84.94  | 2.013 | 169 |
| Sample_SPA06.mb.114cbin.1       | 94.83  | 1.265 | 48  |
| Sample_SPA06.Cluster5570cbin.1  | 85.70  | 0.257 | 247 |
| Sample_SPA06.Cluster625         | 97.95  | 0.000 | 23  |
| Sample_SPA06.mb.133             | 94.48  | 1.698 | 154 |
| Sample_SPA06.Cluster6549cbin.1  | 98.34  | 0.000 | 47  |
| Sample_SPA06.Cluster7016        | 94.52  | 0.000 | 26  |
| Sample_SPA06.mb.134cbin.1       | 89.26  | 0.939 | 32  |
| Sample_SPA06.Cluster12358       | 99.36  | 1.898 | 114 |
| Sample_SPA06.mb.15              | 92.89  | 1.525 | 262 |
| Sample_SPA06.mb.70              | 92.23  | 1.531 | 265 |
| Sample_SPA06.mb.88cbin.1        | 83.62  | 1.724 | 285 |
| Sample_SPA06.mb.136cbin.1       | 99.53  | 0.308 | 89  |
| Sample_SPA06.mb.3cbin.1         | 90.60  | 1.006 | 34  |
| Sample_SPA06.mb.92              | 98.65  | 1.342 | 37  |

|                                 |        |       |     |
|---------------------------------|--------|-------|-----|
| Sample_SPA06.mb.27              | 92.11  | 0.000 | 63  |
| Sample_SPA06.mb.5               | 97.02  | 1.223 | 31  |
| Sample_SPA06.mb.35              | 91.48  | 1.006 | 229 |
| Sample_SPA06.Cluster5434        | 99.19  | 0.192 | 34  |
| Sample_SPA06.Cluster4291cbin.1  | 97.88  | 0.576 | 51  |
| Sample_SPA06.Cluster4973cbin.1  | 97.75  | 0.584 | 144 |
| Sample_SPA06.mb.93cbin.1        | 100.00 | 0.115 | 15  |
| Sample_SPA06.mb.95cbin.1        | 98.43  | 2.013 | 74  |
| Sample_SPA06.mb.77cbin.1        | 98.65  | 0.000 | 19  |
| Sample_SPA06.mb.7cbin.1         | 96.59  | 1.530 | 236 |
| Sample_SPA06.mb.72cbin.1        | 93.96  | 2.464 | 67  |
| Sample_SPA06.Cluster4990cbin.1  | 81.33  | 1.412 | 639 |
| Sample_SPA06.mb.99cbin.1        | 99.53  | 0.307 | 24  |
| Sample_SPA06.mb.59cbin.1        | 98.87  | 2.320 | 178 |
| Sample_SPA07.Cluster12085       | 93.82  | 2.407 | 16  |
| Sample_SPA07.Cluster12056       | 87.92  | 2.247 | 20  |
| Sample_SPA07.Cluster7043        | 96.42  | 0.000 | 47  |
| Sample_SPA07.Cluster958cbin.1   | 93.00  | 1.165 | 77  |
| Sample_SPA07.Cluster3082cbin.1  | 97.19  | 0.671 | 92  |
| Sample_SPA07.Cluster544cbin.1   | 89.93  | 1.006 | 57  |
| Sample_SPA07.mb.69cbin.1        | 83.96  | 1.612 | 202 |
| Sample_SPA07.Cluster99cbin.1    | 93.02  | 0.000 | 26  |
| Sample_SPA07.Cluster356cbin.1   | 93.28  | 2.684 | 106 |
| Sample_SPA07.mb.4               | 99.32  | 2.013 | 70  |
| Sample_SPA07.mb.50              | 89.32  | 0.671 | 62  |
| Sample_SPA07.mb.46cbin.1        | 95.20  | 1.230 | 205 |
| Sample_SPA07.Cluster10244       | 90.62  | 0.951 | 82  |
| Sample_SPA07.mb.9               | 85.95  | 1.123 | 31  |
| Sample_SPA07.Cluster6053cbin.1  | 89.26  | 0.335 | 20  |
| Sample_SPA07.mb.54              | 90.49  | 1.600 | 131 |
| Sample_SPA07.mb.30cbin.1        | 97.31  | 0.000 | 62  |
| Sample_SPA07.mb.32cbin.1        | 85.97  | 0.268 | 376 |
| Sample_SPA07.mb.7cbin.1         | 97.98  | 1.006 | 57  |
| Sample_SPA07.mb.37              | 99.03  | 0.961 | 38  |
| Sample_SPA07.mb.43cbin.1        | 90.82  | 2.173 | 59  |
| Sample_SPA07.Cluster10547cbin.1 | 96.64  | 0.020 | 104 |
| Sample_SPA07.mb.81cbin.1        | 90.84  | 4.261 | 206 |
| Sample_SPA07.mb.31              | 94.01  | 1.842 | 229 |
| Sample_SPA07.mb.62              | 99.05  | 0.000 | 130 |
| Sample_SPA07.mb.67              | 100.00 | 0.480 | 35  |
| Sample_SPA07.Cluster8392cbin.1  | 95.00  | 2.456 | 116 |
| Sample_SPA07.mb.99cbin.1        | 87.63  | 0.960 | 230 |
| Sample_SPA07.mb.20cbin.1        | 97.48  | 0.559 | 75  |
| Sample_SPA07.mb.57              | 89.66  | 0.000 | 41  |
| Sample_SPA07.mb.82              | 89.11  | 0.966 | 51  |
| Sample_SPA07.mb.92              | 97.98  | 0.000 | 20  |
| Sample_SPA07.Cluster5915cbin.1  | 99.61  | 0.984 | 79  |
| Sample_SPA07.mb.38cbin.1        | 92.20  | 1.595 | 227 |
| Sample_SPA07.mb.98cbin.1        | 99.51  | 0.120 | 93  |
| Sample_SPA08.Cluster4973        | 92.93  | 1.342 | 24  |
| Sample_SPA08.mb.10              | 91.57  | 1.685 | 14  |
| Sample_SPA08.mb.105             | 88.20  | 2.247 | 27  |
| Sample_SPA08.mb.123cbin.1       | 80.70  | 0.000 | 101 |
| Sample_SPA08.mb.108             | 87.65  | 0.671 | 48  |
| Sample_SPA08.Cluster744cbin.1   | 94.48  | 2.651 | 198 |
| Sample_SPA08.Cluster60cbin.1    | 96.97  | 0.894 | 110 |
| Sample_SPA08.Cluster216cbin.1   | 95.44  | 2.034 | 194 |
| Sample_SPA08.Cluster8154        | 99.19  | 0.806 | 8   |

|                                 |        |       |     |
|---------------------------------|--------|-------|-----|
| Sample_SPA08.mb.101cbin.1       | 89.61  | 2.539 | 85  |
| Sample_SPA08.mb.28cbin.1        | 97.75  | 0.000 | 92  |
| Sample_SPA08.mb.42              | 88.20  | 1.685 | 54  |
| Sample_SPA08.Cluster707cbin.1   | 88.51  | 3.253 | 235 |
| Sample_SPA08.Cluster10169       | 98.65  | 0.671 | 18  |
| Sample_SPA08.Cluster6153        | 100.00 | 0.480 | 10  |
| Sample_SPA08.Cluster5908        | 99.98  | 1.497 | 20  |
| Sample_SPA08.Cluster6101cbin.1  | 97.58  | 2.898 | 100 |
| Sample_SPA08.mb.37              | 80.93  | 0.671 | 140 |
| Sample_SPA08.Cluster1878        | 98.75  | 0.625 | 39  |
| Sample_SPA08.mb.119             | 99.19  | 0.806 | 90  |
| Sample_SPA08.mb.52              | 98.38  | 0.806 | 44  |
| Sample_SPA08.Cluster7637        | 97.09  | 0.000 | 23  |
| Sample_SPA08.mb.115             | 89.76  | 0.510 | 160 |
| Sample_SPA08.Cluster12217cbin.1 | 98.65  | 0.122 | 70  |
| Sample_SPA08.Cluster5941cbin.1  | 98.30  | 0.675 | 107 |
| Sample_SPA08.mb.72              | 100.00 | 0.111 | 25  |
| Sample_SPA08.mb.29              | 89.93  | 1.342 | 99  |
| Sample_SPA08.mb.13              | 81.29  | 1.530 | 30  |
| Sample_SPA08.mb.124             | 86.61  | 4.407 | 245 |
| Sample_SPA08.mb.40              | 91.93  | 0.061 | 93  |
| Sample_SPA08.mb.47cbin.1        | 87.05  | 2.590 | 335 |
| Sample_SPA08.mb.120             | 90.18  | 0.584 | 72  |
| Sample_SPA08.mb.65cbin.1        | 95.97  | 0.000 | 39  |
| Sample_SPA08.mb.17              | 97.31  | 0.000 | 15  |
| Sample_SPA08.mb.56              | 85.55  | 2.516 | 209 |
| Sample_SPA08.Cluster6551cbin.1  | 97.31  | 3.225 | 300 |
| Sample_SPA08.mb.75cbin.1        | 95.74  | 0.671 | 127 |
| Sample_SPA08.mb.83cbin.1        | 97.09  | 2.818 | 73  |
| Sample_SPA08.mb.70cbin.1        | 87.24  | 0.671 | 180 |
| Sample_SPA08.mb.68              | 90.60  | 1.565 | 127 |
| Sample_SPA08.mb.74              | 96.64  | 0.000 | 18  |
| Sample_SPA08.mb.14cbin.1        | 94.73  | 1.570 | 67  |
| Sample_SPA08.mb.66              | 95.57  | 0.000 | 43  |
| Sample_SPA08.mb.64cbin.1        | 90.16  | 3.463 | 158 |
| Sample_SPA08.mb.86              | 100.00 | 0.000 | 64  |
| Sample_SPA08.mb.4cbin.1         | 92.10  | 3.683 | 85  |
| Sample_SPA08.mb.90cbin.1        | 100.00 | 1.145 | 31  |
| Sample_SPA08.mb.125             | 98.51  | 1.486 | 41  |
| Sample_SPA08.mb.97cbin.1        | 97.83  | 4.342 | 31  |
| Sample_SPA08.mb.80cbin.1        | 95.06  | 2.150 | 333 |
| Sample_SPA09.mb.27cbin.1        | 80.70  | 3.508 | 57  |
| Sample_SPA09.mb.2cbin.1         | 81.03  | 0.000 | 87  |
| Sample_SPA09.Cluster5439cbin.1  | 90.73  | 0.671 | 334 |
| Sample_SPA09.mb.40cbin.1        | 88.94  | 3.020 | 270 |
| Sample_SPA09.mb.10cbin.1        | 88.59  | 0.000 | 23  |
| Sample_SPA09.mb.90              | 84.59  | 2.013 | 290 |
| Sample_SPA09.Cluster6961        | 85.90  | 0.000 | 42  |
| Sample_SPA09.Cluster404cbin.1   | 96.05  | 0.680 | 229 |
| Sample_SPA09.mb.93cbin.1        | 87.15  | 2.013 | 387 |
| Sample_SPA09.mb.63cbin.1        | 90.71  | 1.898 | 203 |
| Sample_SPA09.mb.91              | 98.18  | 1.286 | 102 |
| Sample_SPA09.Cluster1823        | 94.54  | 0.681 | 15  |
| Sample_SPA09.mb.58              | 90.70  | 3.164 | 130 |
| Sample_SPA09.mb.48              | 91.03  | 1.754 | 99  |
| Sample_SPA09.mb.38              | 96.62  | 0.153 | 76  |
| Sample_SPA09.mb.80cbin.1        | 92.30  | 2.777 | 79  |
| Sample_SPA09.mb.67              | 95.00  | 1.449 | 139 |

|                                 |       |       |     |
|---------------------------------|-------|-------|-----|
| Sample_SPA09.Cluster10012cbin.1 | 96.88 | 3.692 | 72  |
| Sample_SPA09.mb.15cbin.1        | 95.16 | 2.914 | 69  |
| Sample_SPA09.mb.39              | 93.75 | 2.430 | 25  |
| Sample_SPA09.Cluster6494cbin.1  | 97.73 | 0.000 | 26  |
| Sample_SPA09.mb.89              | 94.81 | 4.697 | 51  |
| Sample_SPA09.mb.99cbin.1        | 94.23 | 0.961 | 28  |
| Sample_SPA09.mb.20              | 87.46 | 0.000 | 39  |
| Sample_SPA09.mb.28              | 93.71 | 2.971 | 66  |
| Sample_SPA09.mb.88cbin.1        | 97.46 | 0.105 | 55  |
| Sample_SPA09.mb.82cbin.1        | 96.79 | 2.884 | 288 |
| Sample_SPA09.Cluster99cbin.1    | 95.49 | 1.580 | 171 |
| Sample_SPA10.mb.16cbin.1        | 98.94 | 1.265 | 35  |
| Sample_SPA10.mb.26              | 98.65 | 0.671 | 58  |
| Sample_SPA10.mb.36cbin.1        | 85.22 | 0.680 | 347 |
| Sample_SPA10.mb.42              | 97.46 | 0.000 | 68  |
| Sample_SPA10.mb.19              | 98.65 | 0.335 | 44  |
| Sample_SPA10.mb.53cbin.1        | 98.32 | 4.718 | 497 |
| Sample_SPA10.mb.20cbin.1        | 90.78 | 0.170 | 82  |
| Sample_SPA10.mb.29cbin.1        | 93.25 | 1.207 | 30  |
| Sample_SPA10.mb.61              | 97.98 | 0.335 | 39  |
| Sample_SPA10.Cluster4817        | 97.98 | 0.000 | 18  |
| Sample_SPA10.mb.48              | 92.49 | 1.988 | 147 |
| Sample_SPA10.mb.34              | 90.78 | 0.000 | 201 |
| Sample_SPA10.mb.31cbin.1        | 96.28 | 0.632 | 35  |
| Sample_SPA10.mb.55              | 86.93 | 1.169 | 59  |
| Sample_SPA10.Cluster1134cbin.1  | 96.83 | 0.105 | 55  |
| Sample_SPA10.mb.51cbin.1        | 97.66 | 0.000 | 49  |
| Sample_SPA10.Cluster25cbin.1    | 96.90 | 1.209 | 302 |
| Sample_SPA10.mb.15cbin.1        | 97.06 | 2.602 | 47  |
| Sample_SPA10.mb.18cbin.1        | 93.36 | 0.681 | 54  |
| Sample_SPA10.mb.17cbin.1        | 99.42 | 0.192 | 37  |
| Sample_SPA10.Cluster1582cbin.1  | 92.37 | 2.081 | 253 |
| Sample_SPA10.Cluster2898        | 97.74 | 2.819 | 42  |
| Sample_SPA11.Cluster4973cbin.1  | 94.05 | 2.684 | 358 |
| Sample_SPA11.Cluster127cbin.1   | 83.48 | 2.460 | 175 |
| Sample_SPA11.Cluster6814cbin.1  | 96.62 | 0.000 | 31  |
| Sample_SPA11.Cluster5732        | 99.19 | 0.115 | 15  |
| Sample_SPA11.Cluster231cbin.1   | 91.72 | 3.691 | 64  |
| Sample_SPA11.Cluster440cbin.1   | 94.62 | 0.000 | 43  |
| Sample_SPA11.Cluster6967cbin.1  | 93.24 | 0.632 | 36  |
| Sample_SPA11.Cluster79cbin.1    | 90.66 | 2.684 | 68  |
| Sample_SPA11.Cluster12075cbin.1 | 97.30 | 0.134 | 208 |
| Sample_SPA11.Cluster73cbin.1    | 98.32 | 3.087 | 40  |
| Sample_SPA11.Cluster5881cbin.1  | 94.68 | 1.449 | 73  |
| Sample_SPA11.Cluster3236        | 97.27 | 0.000 | 17  |
| Sample_SPA11.Cluster5039        | 99.40 | 0.898 | 45  |
| Sample_SPA11.Cluster1285        | 98.75 | 0.625 | 26  |
| Sample_SPA11.mb.118             | 82.55 | 0.000 | 139 |
| Sample_SPA11.Cluster2524cbin.1  | 98.65 | 1.006 | 42  |
| Sample_SPA11.Cluster10740       | 87.68 | 0.636 | 71  |
| Sample_SPA11.mb.55cbin.1        | 89.31 | 3.761 | 145 |
| Sample_SPA11.mb.39cbin.1        | 96.77 | 1.545 | 143 |
| Sample_SPA11.Cluster9675        | 97.98 | 1.006 | 17  |
| Sample_SPA11.mb.12cbin.1        | 84.62 | 1.898 | 349 |
| Sample_SPA11.mb.16cbin.1        | 82.31 | 1.700 | 77  |
| Sample_SPA11.mb.14              | 87.52 | 2.267 | 156 |
| Sample_SPA11.Cluster8660        | 88.04 | 0.402 | 72  |
| Sample_SPA11.mb.101cbin.1       | 95.95 | 0.671 | 98  |



|                                 |        |       |     |
|---------------------------------|--------|-------|-----|
| Sample_SPA11.mb.78cbin.1        | 98.60  | 3.263 | 102 |
| Sample_SPA11.mb.18cbin.1        | 94.48  | 0.000 | 102 |
| Sample_SPA11.Cluster4412cbin.1  | 97.84  | 0.779 | 205 |
| Sample_SPA11.Cluster4833cbin.1  | 96.59  | 2.338 | 109 |
| Sample_SPA11.mb.21              | 99.32  | 0.335 | 25  |
| Sample_SPA11.mb.111cbin.1       | 96.49  | 0.953 | 63  |
| Sample_SPA11.Cluster1799cbin.1  | 89.74  | 0.192 | 490 |
| Sample_SPA11.mb.41              | 95.19  | 0.961 | 29  |
| Sample_SPA11.Cluster5091        | 99.23  | 0.000 | 46  |
| Sample_SPA11.mb.43              | 90.88  | 2.040 | 250 |
| Sample_SPA11.mb.3               | 85.69  | 0.949 | 314 |
| Sample_SPA11.mb.37              | 91.94  | 0.000 | 20  |
| Sample_SPA11.mb.38cbin.1        | 97.26  | 0.000 | 34  |
| Sample_SPA11.mb.93              | 94.14  | 2.215 | 198 |
| Sample_SPA11.mb.85              | 91.10  | 1.433 | 103 |
| Sample_SPA11.mb.58cbin.1        | 81.21  | 4.988 | 343 |
| Sample_SPA11.mb.62              | 90.25  | 4.305 | 113 |
| Sample_SPA11.mb.36              | 99.62  | 0.000 | 17  |
| Sample_SPA11.mb.9cbin.1         | 100.00 | 0.480 | 26  |
| Sample_SPA11.mb.51cbin.1        | 90.70  | 4.480 | 377 |
| Sample_SPA11.mb.74cbin.1        | 90.74  | 1.119 | 69  |
| Sample_SPA11.mb.50              | 88.82  | 2.416 | 201 |
| Sample_SPA11.mb.92              | 94.10  | 0.827 | 193 |
| Sample_SPA12.Cluster24708cbin.1 | 92.41  | 2.247 | 29  |
| Sample_SPA12.Cluster11878       | 92.90  | 2.633 | 311 |
| Sample_SPA12.Cluster259         | 80.69  | 2.237 | 111 |
| Sample_SPA12.mb.127             | 100.00 | 1.444 | 58  |
| Sample_SPA12.Cluster10362       | 96.30  | 0.000 | 38  |
| Sample_SPA12.mb.124cbin.1       | 88.84  | 3.579 | 235 |
| Sample_SPA12.Cluster18234cbin.1 | 96.64  | 0.000 | 49  |
| Sample_SPA12.Cluster17354cbin.1 | 89.39  | 2.531 | 397 |
| Sample_SPA12.mb.101             | 83.66  | 1.342 | 277 |
| Sample_SPA12.Cluster23502cbin.1 | 99.05  | 0.471 | 128 |
| Sample_SPA12.mb.117             | 94.83  | 2.013 | 124 |
| Sample_SPA12.Cluster5511cbin.1  | 81.04  | 0.679 | 161 |
| Sample_SPA12.Cluster20418cbin.1 | 93.95  | 1.342 | 31  |
| Sample_SPA12.mb.27              | 98.38  | 0.806 | 48  |
| Sample_SPA12.mb.21cbin.1        | 93.59  | 0.115 | 214 |
| Sample_SPA12.mb.147             | 99.36  | 3.375 | 136 |
| Sample_SPA12.Cluster5034        | 97.95  | 0.000 | 17  |
| Sample_SPA12.mb.109cbin.1       | 92.61  | 0.671 | 150 |
| Sample_SPA12.mb.22cbin.1        | 86.95  | 4.593 | 153 |
| Sample_SPA12.mb.68cbin.1        | 92.17  | 0.671 | 35  |
| Sample_SPA12.mb.73              | 80.02  | 1.677 | 32  |
| Sample_SPA12.mb.52cbin.1        | 92.98  | 2.320 | 208 |
| Sample_SPA12.mb.31              | 85.02  | 2.607 | 256 |
| Sample_SPA12.mb.14cbin.1        | 80.13  | 2.348 | 381 |
| Sample_SPA12.mb.89              | 92.37  | 4.918 | 440 |
| Sample_SPA12.mb.34cbin.1        | 99.27  | 0.632 | 87  |
| Sample_SPA12.mb.95              | 87.89  | 0.805 | 237 |
| Sample_SPA12.mb.50              | 90.32  | 1.245 | 279 |
| Sample_SPA12.mb.36cbin.1        | 88.11  | 3.396 | 32  |
| Sample_SPA12.mb.80              | 94.65  | 3.020 | 245 |
| Sample_SPA12.mb.90              | 88.01  | 1.465 | 40  |
| Sample_SPA12.mb.59              | 91.19  | 3.131 | 202 |
| Sample_SPA12.mb.86              | 83.45  | 2.233 | 141 |
| Sample_SPA12.mb.96              | 95.80  | 0.898 | 92  |
| Sample_SPA12.mb.82              | 97.51  | 0.621 | 131 |

|                                 |        |       |     |
|---------------------------------|--------|-------|-----|
| Sample_SPA12.mb.94              | 95.57  | 0.000 | 41  |
| Sample_SPA12.mb.9cbin.1         | 97.27  | 0.000 | 22  |
| Sample_SPA12.mb.37              | 94.05  | 0.384 | 320 |
| Sample_SPA12.Cluster1195cbin.1  | 99.24  | 3.527 | 65  |
| Sample_SPA12.mb.65              | 98.06  | 2.958 | 113 |
| Sample_SPA13.Cluster985cbin.1   | 97.17  | 0.806 | 133 |
| Sample_SPA13.Cluster7268cbin.1  | 98.65  | 0.335 | 15  |
| Sample_SPA13.Cluster230         | 87.24  | 2.684 | 34  |
| Sample_SPA13.mb.38              | 95.74  | 0.671 | 53  |
| Sample_SPA13.mb.12              | 95.97  | 0.000 | 60  |
| Sample_SPA13.mb.61cbin.1        | 81.14  | 2.586 | 702 |
| Sample_SPA13.Cluster160         | 98.38  | 0.806 | 38  |
| Sample_SPA13.mb.46              | 99.19  | 0.115 | 32  |
| Sample_SPA13.mb.33              | 95.30  | 1.610 | 217 |
| Sample_SPA13.Cluster5892        | 96.64  | 1.006 | 16  |
| Sample_SPA13.mb.19cbin.1        | 95.55  | 2.095 | 184 |
| Sample_SPA13.Cluster518         | 91.50  | 0.681 | 49  |
| Sample_SPA13.Cluster288         | 99.54  | 3.598 | 32  |
| Sample_SPA13.Cluster281         | 100.00 | 0.076 | 18  |
| Sample_SPA13.Cluster824         | 98.75  | 0.625 | 34  |
| Sample_SPA13.mb.47cbin.1        | 81.02  | 0.000 | 296 |
| Sample_SPA13.mb.62cbin.1        | 92.61  | 0.671 | 44  |
| Sample_SPA13.Cluster4841        | 99.51  | 1.449 | 77  |
| Sample_SPA13.mb.3               | 97.93  | 0.136 | 121 |
| Sample_SPA13.Cluster428cbin.1   | 99.31  | 0.371 | 47  |
| Sample_SPA13.mb.74cbin.1        | 98.65  | 2.013 | 109 |
| Sample_SPA13.mb.6               | 97.11  | 0.000 | 26  |
| Sample_SPA13.mb.29              | 100.00 | 0.000 | 58  |
| Sample_SPA13.mb.36              | 96.04  | 0.161 | 237 |
| Sample_SPA13.Cluster2414cbin.1  | 96.52  | 1.610 | 51  |
| Sample_SPA13.mb.49              | 88.27  | 4.766 | 445 |
| Sample_SPA13.mb.24              | 98.39  | 1.160 | 107 |
| Sample_SPA13.Cluster3020        | 99.61  | 0.512 | 57  |
| Sample_SPA13.mb.50              | 99.62  | 0.000 | 19  |
| Sample_SPA13.Cluster2319cbin.1  | 95.34  | 0.371 | 57  |
| Sample_SPA13.mb.67cbin.1        | 97.49  | 3.481 | 93  |
| Sample_SPA13.mb.65              | 84.14  | 2.083 | 238 |
| Sample_SPA13.mb.86              | 98.30  | 1.518 | 35  |
| Sample_SPA13.mb.69              | 98.83  | 0.000 | 73  |
| Sample_SPA13.mb.64cbin.1        | 99.42  | 3.782 | 60  |
| Sample_SPA15.Cluster10137       | 91.73  | 0.806 | 26  |
| Sample_SPA15.mb.22              | 97.17  | 0.806 | 49  |
| Sample_SPA15.Cluster344         | 81.20  | 0.671 | 27  |
| Sample_SPA15.Cluster227cbin.1   | 90.17  | 2.071 | 208 |
| Sample_SPA15.mb.23              | 81.33  | 3.020 | 124 |
| Sample_SPA15.Cluster15391cbin.1 | 86.37  | 3.164 | 363 |
| Sample_SPA15.mb.4               | 91.92  | 3.355 | 27  |
| Sample_SPA15.mb.29              | 89.87  | 0.000 | 175 |
| Sample_SPA15.mb.102cbin.1       | 88.81  | 1.027 | 237 |
| Sample_SPA15.Cluster523         | 85.90  | 0.805 | 20  |
| Sample_SPA15.mb.24cbin.1        | 89.26  | 3.355 | 54  |
| Sample_SPA15.mb.38              | 94.09  | 1.342 | 131 |
| Sample_SPA15.mb.28              | 86.74  | 1.342 | 59  |
| Sample_SPA15.mb.59cbin.1        | 94.82  | 1.344 | 194 |
| Sample_SPA15.Cluster3881        | 96.37  | 0.671 | 17  |
| Sample_SPA15.mb.35              | 87.70  | 1.738 | 149 |
| Sample_SPA15.Cluster7678cbin.1  | 98.80  | 2.245 | 72  |
| Sample_SPA15.mb.58              | 92.05  | 3.691 | 92  |

|                                 |        |       |     |
|---------------------------------|--------|-------|-----|
| Sample_SPA15.mb.54              | 87.11  | 2.705 | 137 |
| Sample_SPA15.mb.65              | 88.63  | 1.342 | 42  |
| Sample_SPA15.mb.81              | 85.79  | 3.601 | 226 |
| Sample_SPA15.mb.91cbin.1        | 91.26  | 1.111 | 155 |
| Sample_SPA15.mb.63              | 91.94  | 0.000 | 87  |
| Sample_SPA15.mb.55              | 90.93  | 3.243 | 310 |
| Sample_SPA15.mb.66              | 97.27  | 0.000 | 24  |
| Sample_SPA15.mb.71              | 98.65  | 0.000 | 60  |
| Sample_SPA15.mb.88              | 96.64  | 0.223 | 26  |
| Sample_SPA15.Cluster8224cbin.1  | 96.39  | 0.743 | 236 |
| Sample_SPA15.Cluster10540cbin.1 | 97.39  | 1.486 | 102 |
| Sample_SPA15.mb.13cbin.1        | 93.14  | 1.762 | 652 |
| Sample_SPA15.Cluster1062cbin.1  | 92.71  | 0.307 | 44  |
| Sample_SPA15.mb.69cbin.1        | 97.86  | 0.508 | 69  |
| Sample_SPA16.Cluster3423cbin.1  | 80.90  | 0.632 | 144 |
| Sample_SPA16.Cluster10324cbin.1 | 91.64  | 2.594 | 65  |
| Sample_SPA16.Cluster9401cbin.1  | 81.01  | 1.898 | 93  |
| Sample_SPA16.Cluster3843        | 99.18  | 0.000 | 28  |
| Sample_SPA16.Cluster2004cbin.1  | 97.77  | 0.000 | 82  |
| Sample_SPA16.mb.2cbin.1         | 91.60  | 1.841 | 86  |
| Sample_SPA16.mb.1               | 98.65  | 2.016 | 71  |
| Sample_SPA16.mb.117cbin.1       | 84.83  | 3.117 | 221 |
| Sample_SPA16.mb.59              | 97.81  | 0.671 | 167 |
| Sample_SPA16.Cluster967cbin.1   | 90.62  | 0.000 | 102 |
| Sample_SPA16.mb.38              | 86.07  | 3.888 | 278 |
| Sample_SPA16.mb.46              | 85.88  | 1.898 | 207 |
| Sample_SPA16.mb.65cbin.1        | 99.32  | 4.194 | 212 |
| Sample_SPA16.mb.42              | 85.69  | 1.461 | 59  |
| Sample_SPA16.Cluster6977cbin.1  | 93.23  | 0.241 | 80  |
| Sample_SPA16.Cluster9846cbin.1  | 95.54  | 2.547 | 55  |
| Sample_SPA16.mb.77              | 90.66  | 2.531 | 170 |
| Sample_SPA16.Cluster3151cbin.1  | 94.48  | 0.000 | 85  |
| Sample_SPA16.mb.39cbin.1        | 95.11  | 0.000 | 51  |
| Sample_SPA16.mb.54              | 95.11  | 0.000 | 32  |
| Sample_SPA16.mb.88              | 88.31  | 1.006 | 217 |
| Sample_SPA16.mb.48              | 94.35  | 0.967 | 60  |
| Sample_SPA16.mb.14cbin.1        | 92.89  | 3.734 | 307 |
| Sample_SPA16.mb.9               | 90.72  | 2.210 | 191 |
| Sample_SPA16.mb.69              | 99.90  | 0.454 | 23  |
| Sample_SPA16.mb.99cbin.1        | 98.48  | 1.741 | 217 |
| Sample_SPA17.Cluster7053cbin.1  | 82.75  | 0.000 | 337 |
| Sample_SPA17.mb.52              | 92.61  | 0.000 | 19  |
| Sample_SPA17.Cluster449         | 92.61  | 0.671 | 40  |
| Sample_SPA17.mb.95cbin.1        | 81.37  | 1.724 | 49  |
| Sample_SPA17.Cluster1797        | 96.46  | 0.000 | 59  |
| Sample_SPA17.mb.44              | 96.51  | 2.004 | 126 |
| Sample_SPA17.mb.17              | 90.50  | 1.265 | 263 |
| Sample_SPA17.mb.79              | 85.90  | 2.348 | 205 |
| Sample_SPA17.Cluster1537        | 98.80  | 1.497 | 20  |
| Sample_SPA17.mb.41cbin.1        | 99.03  | 0.961 | 40  |
| Sample_SPA17.mb.3cbin.1         | 100.00 | 0.806 | 44  |
| Sample_SPA17.mb.39cbin.1        | 89.77  | 0.431 | 50  |
| Sample_SPA17.mb.78cbin.1        | 99.36  | 0.000 | 41  |
| Sample_SPA17.mb.36cbin.1        | 85.84  | 0.000 | 57  |
| Sample_SPA17.mb.24              | 83.20  | 0.000 | 61  |
| Sample_SPA17.Cluster883cbin.1   | 88.79  | 3.231 | 85  |
| Sample_SPA17.mb.33cbin.1        | 82.72  | 1.577 | 530 |
| Sample_SPA17.mb.76              | 82.55  | 2.534 | 73  |

|                                 |        |       |     |
|---------------------------------|--------|-------|-----|
| Sample_SPA17.Cluster6320        | 96.88  | 0.000 | 18  |
| Sample_SPA17.Cluster4831cbin.1  | 90.38  | 0.447 | 187 |
| Sample_SPA17.mb.75cbin.1        | 96.87  | 0.000 | 55  |
| Sample_SPA17.mb.98              | 89.44  | 0.000 | 60  |
| Sample_SPA17.mb.8cbin.1         | 99.47  | 0.000 | 19  |
| Sample_SPA17.Cluster6508        | 100.00 | 2.247 | 72  |
| Sample_SPA17.mb.114             | 94.92  | 2.657 | 136 |
| Sample_SPA17.mb.88cbin.1        | 87.34  | 0.738 | 150 |
| Sample_SPA17.mb.70              | 81.22  | 1.489 | 143 |
| Sample_SPA17.mb.16cbin.1        | 96.53  | 0.192 | 49  |
| Sample_SPA17.mb.108cbin.1       | 92.16  | 0.000 | 91  |
| Sample_SPA17.Cluster2740        | 99.42  | 0.384 | 33  |
| Sample_SPA17.mb.97cbin.1        | 80.59  | 0.539 | 31  |
| Sample_SPA20.mb.23              | 94.63  | 1.677 | 173 |
| Sample_SPA20.mb.12cbin.1        | 98.65  | 1.565 | 117 |
| Sample_SPA20.mb.36              | 99.32  | 1.230 | 69  |
| Sample_SPA20.Cluster2573        | 99.18  | 0.543 | 19  |
| Sample_SPA20.mb.5               | 88.00  | 1.078 | 80  |
| Sample_SPA20.mb.32cbin.1        | 97.17  | 3.225 | 90  |
| Sample_SPA20.Cluster1446cbin.1  | 95.59  | 0.000 | 83  |
| Sample_SPA20.mb.39cbin.1        | 86.95  | 0.894 | 239 |
| Sample_SPA20.mb.61cbin.1        | 92.72  | 1.265 | 274 |
| Sample_SPA20.Cluster130         | 99.53  | 0.230 | 16  |
| Sample_SPA20.mb.9               | 96.02  | 0.000 | 44  |
| Sample_SPA20.mb.6cbin.1         | 91.94  | 1.677 | 26  |
| Sample_SPA20.Cluster6883cbin.1  | 99.47  | 0.261 | 36  |
| Sample_SPA20.Cluster4938cbin.1  | 80.40  | 0.292 | 46  |
| Sample_SPA20.mb.24cbin.1        | 94.93  | 0.105 | 92  |
| Sample_SPA20.mb.43              | 93.92  | 0.949 | 71  |
| Sample_SPA20.Cluster2412cbin.1  | 96.62  | 0.621 | 103 |
| Sample_SPA21.Cluster2186cbin.1  | 95.69  | 0.097 | 139 |
| Sample_SPA21.mb.117             | 93.25  | 1.284 | 5   |
| Sample_SPA21.Cluster11127cbin.1 | 87.70  | 2.237 | 294 |
| Sample_SPA21.Cluster18          | 83.42  | 1.230 | 176 |
| Sample_SPA21.mb.25              | 92.41  | 0.000 | 19  |
| Sample_SPA21.mb.113cbin.1       | 92.06  | 1.515 | 90  |
| Sample_SPA21.Cluster4618cbin.1  | 97.20  | 0.000 | 78  |
| Sample_SPA21.mb.103             | 91.05  | 0.000 | 51  |
| Sample_SPA21.Cluster6505cbin.1  | 97.09  | 0.671 | 83  |
| Sample_SPA21.Cluster7151cbin.1  | 90.93  | 0.000 | 46  |
| Sample_SPA21.mb.65              | 82.45  | 0.000 | 272 |
| Sample_SPA21.Cluster10395cbin.1 | 92.61  | 0.335 | 39  |
| Sample_SPA21.mb.110             | 90.82  | 1.464 | 62  |
| Sample_SPA21.Cluster6611        | 94.29  | 3.355 | 25  |
| Sample_SPA21.mb.116cbin.1       | 97.99  | 0.961 | 54  |
| Sample_SPA21.mb.26              | 88.96  | 2.993 | 97  |
| Sample_SPA21.Cluster125cbin.1   | 98.65  | 1.342 | 63  |
| Sample_SPA21.Cluster7969        | 95.95  | 3.635 | 76  |
| Sample_SPA21.mb.70cbin.1        | 88.54  | 4.865 | 117 |
| Sample_SPA21.Cluster9049cbin.1  | 98.65  | 1.384 | 44  |
| Sample_SPA21.mb.75cbin.1        | 91.94  | 3.376 | 76  |
| Sample_SPA21.mb.118cbin.1       | 88.40  | 0.000 | 89  |
| Sample_SPA21.mb.11              | 90.78  | 0.527 | 259 |
| Sample_SPA21.mb.37cbin.1        | 100.00 | 0.480 | 44  |
| Sample_SPA21.mb.13cbin.1        | 94.93  | 0.000 | 74  |
| Sample_SPA21.mb.121             | 83.21  | 1.722 | 320 |
| Sample_SPA21.mb.53              | 97.16  | 0.000 | 79  |
| Sample_SPA21.mb.124             | 96.42  | 0.483 | 52  |

|                                 |        |       |     |
|---------------------------------|--------|-------|-----|
| Sample_SPA21.mb.61              | 92.87  | 1.016 | 64  |
| Sample_SPA21.mb.76              | 100.00 | 0.000 | 122 |
| Sample_SPA21.mb.84              | 96.41  | 0.881 | 184 |
| Sample_SPA21.mb.39cbin.1        | 92.34  | 0.000 | 45  |
| Sample_SPA21.mb.79              | 94.90  | 1.886 | 313 |
| Sample_SPA21.mb.2               | 95.66  | 1.883 | 91  |
| Sample_SPA21.mb.114cbin.1       | 96.12  | 0.371 | 51  |
| Sample_SPA21.mb.41cbin.1        | 94.80  | 1.923 | 136 |
| Sample_SPA21.mb.60              | 97.94  | 1.923 | 47  |
| Sample_SPA22.Cluster19998       | 94.94  | 2.407 | 26  |
| Sample_SPA22.Cluster19730       | 91.01  | 0.561 | 11  |
| Sample_SPA22.Cluster13759       | 98.87  | 1.123 | 33  |
| Sample_SPA22.Cluster19925       | 98.66  | 0.111 | 7   |
| Sample_SPA22.Cluster10053       | 92.17  | 0.671 | 17  |
| Sample_SPA22.Cluster10703cbin.1 | 96.35  | 1.364 | 112 |
| Sample_SPA22.Cluster19293cbin.1 | 89.74  | 1.139 | 28  |
| Sample_SPA22.mb.10cbin.1        | 84.61  | 4.464 | 82  |
| Sample_SPA22.Cluster18334cbin.1 | 83.12  | 3.113 | 290 |
| Sample_SPA22.mb.108cbin.1       | 98.79  | 3.494 | 100 |
| Sample_SPA22.mb.21              | 85.95  | 2.247 | 23  |
| Sample_SPA22.Cluster358cbin.1   | 84.56  | 3.691 | 91  |
| Sample_SPA22.mb.37              | 96.77  | 0.000 | 87  |
| Sample_SPA22.mb.28cbin.1        | 85.12  | 0.268 | 60  |
| Sample_SPA22.Cluster926cbin.1   | 87.36  | 1.342 | 36  |
| Sample_SPA22.Cluster221cbin.1   | 86.40  | 2.040 | 315 |
| Sample_SPA22.mb.14cbin.1        | 83.78  | 4.091 | 208 |
| Sample_SPA22.Cluster14389cbin.1 | 91.82  | 0.041 | 51  |
| Sample_SPA22.mb.8               | 93.82  | 2.247 | 10  |
| Sample_SPA22.Cluster14174cbin.1 | 91.63  | 2.769 | 229 |
| Sample_SPA22.Cluster8559        | 98.89  | 0.898 | 31  |
| Sample_SPA22.mb.4               | 87.02  | 0.671 | 47  |
| Sample_SPA22.mb.120             | 92.70  | 2.380 | 137 |
| Sample_SPA22.mb.32cbin.1        | 96.12  | 4.838 | 197 |
| Sample_SPA22.mb.36              | 97.87  | 0.000 | 62  |
| Sample_SPA22.mb.91              | 80.16  | 1.748 | 49  |
| Sample_SPA22.mb.2cbin.1         | 93.26  | 1.121 | 38  |
| Sample_SPA22.Cluster1203cbin.1  | 97.51  | 0.000 | 191 |
| Sample_SPA22.mb.77              | 95.97  | 0.671 | 44  |
| Sample_SPA22.mb.122             | 97.09  | 0.000 | 28  |
| Sample_SPA22.mb.58              | 88.05  | 1.342 | 35  |
| Sample_SPA22.mb.96              | 85.18  | 1.510 | 218 |
| Sample_SPA22.mb.53              | 91.44  | 3.368 | 245 |
| Sample_SPA22.mb.82              | 89.93  | 1.189 | 38  |
| Sample_SPA22.Cluster14732cbin.1 | 93.75  | 1.890 | 170 |
| Sample_SPA22.mb.84              | 91.19  | 2.621 | 288 |
| Sample_SPA22.mb.93              | 97.27  | 0.335 | 28  |
| Sample_SPA22.mb.98cbin.1        | 89.18  | 0.961 | 102 |
| Sample_SPA22.mb.41              | 99.62  | 0.000 | 38  |
| Sample_SPA22.mb.110             | 92.89  | 2.803 | 157 |
| Sample_SPA25.Cluster129cbin.1   | 90.36  | 3.322 | 195 |
| Sample_SPA25.Cluster3919cbin.1  | 93.14  | 0.806 | 43  |
| Sample_SPA25.Cluster11307       | 88.88  | 0.854 | 18  |
| Sample_SPA25.Cluster5997        | 99.19  | 0.115 | 22  |
| Sample_SPA25.Cluster1390cbin.1  | 86.95  | 2.818 | 357 |
| Sample_SPA25.Cluster3488        | 91.94  | 0.000 | 18  |
| Sample_SPA25.mb.57cbin.1        | 84.83  | 0.000 | 144 |
| Sample_SPA25.Cluster557         | 93.54  | 0.806 | 42  |
| Sample_SPA25.mb.13cbin.1        | 85.78  | 4.026 | 273 |

|                                 |        |       |     |
|---------------------------------|--------|-------|-----|
| Sample_SPA25.mb.30cbin.1        | 89.59  | 1.342 | 45  |
| Sample_SPA25.mb.42              | 89.00  | 4.194 | 202 |
| Sample_SPA25.mb.68              | 99.30  | 1.864 | 87  |
| Sample_SPA25.Cluster9308        | 95.03  | 0.335 | 32  |
| Sample_SPA25.Cluster26cbin.1    | 86.56  | 0.134 | 300 |
| Sample_SPA25.Cluster3311cbin.1  | 95.26  | 2.013 | 26  |
| Sample_SPA25.Cluster1972        | 97.95  | 0.000 | 21  |
| Sample_SPA25.Cluster5883        | 97.92  | 1.198 | 79  |
| Sample_SPA25.mb.7cbin.1         | 89.26  | 1.006 | 99  |
| Sample_SPA25.mb.41              | 94.55  | 0.480 | 128 |
| Sample_SPA25.mb.45cbin.1        | 87.62  | 0.671 | 306 |
| Sample_SPA25.mb.23cbin.1        | 99.42  | 3.117 | 169 |
| Sample_SPA25.mb.71              | 97.58  | 0.879 | 118 |
| Sample_SPA25.mb.28              | 96.10  | 0.000 | 58  |
| Sample_SPA25.mb.86              | 91.58  | 0.032 | 20  |
| Sample_SPA25.mb.92cbin.1        | 98.79  | 2.644 | 49  |
| Sample_SPA25.mb.46cbin.1        | 98.22  | 0.000 | 203 |
| Sample_SPA25.Cluster4646cbin.1  | 93.99  | 1.765 | 58  |
| Sample_SPA25.mb.81              | 94.04  | 0.483 | 36  |
| Sample_SPA25.mb.6cbin.1         | 99.27  | 0.523 | 24  |
| Sample_SPA25.mb.99              | 95.97  | 0.335 | 67  |
| Sample_SPA25.mb.95              | 98.49  | 1.132 | 26  |
| Sample_SPA26.Cluster15006       | 92.69  | 1.123 | 21  |
| Sample_SPA26.mb.104             | 92.41  | 2.247 | 32  |
| Sample_SPA26.Cluster14380cbin.1 | 89.74  | 1.424 | 80  |
| Sample_SPA26.Cluster6968cbin.1  | 85.19  | 0.671 | 30  |
| Sample_SPA26.mb.36              | 92.41  | 2.247 | 18  |
| Sample_SPA26.Cluster48cbin.1    | 93.95  | 2.852 | 185 |
| Sample_SPA26.mb.17              | 93.26  | 1.342 | 34  |
| Sample_SPA26.Cluster2066        | 97.14  | 0.000 | 28  |
| Sample_SPA26.Cluster2008cbin.1  | 80.58  | 1.589 | 338 |
| Sample_SPA26.mb.133             | 92.61  | 2.684 | 45  |
| Sample_SPA26.Cluster4054cbin.1  | 92.47  | 1.115 | 74  |
| Sample_SPA26.mb.20cbin.1        | 89.37  | 0.000 | 51  |
| Sample_SPA26.Cluster5890cbin.1  | 97.39  | 1.250 | 106 |
| Sample_SPA26.Cluster4627cbin.1  | 98.73  | 0.632 | 106 |
| Sample_SPA26.Cluster1527cbin.1  | 96.20  | 0.625 | 202 |
| Sample_SPA26.mb.130cbin.1       | 95.13  | 2.684 | 271 |
| Sample_SPA26.Cluster12075       | 99.32  | 0.000 | 25  |
| Sample_SPA26.mb.30              | 96.30  | 0.000 | 81  |
| Sample_SPA26.Cluster751         | 100.00 | 0.909 | 20  |
| Sample_SPA26.mb.27              | 100.00 | 1.612 | 41  |
| Sample_SPA26.Cluster9645        | 97.09  | 0.000 | 21  |
| Sample_SPA26.mb.13cbin.1        | 95.59  | 2.684 | 27  |
| Sample_SPA26.mb.79              | 98.16  | 4.704 | 148 |
| Sample_SPA26.mb.50              | 88.59  | 4.026 | 114 |
| Sample_SPA26.mb.95              | 82.11  | 0.671 | 378 |
| Sample_SPA26.Cluster986         | 90.00  | 2.596 | 31  |
| Sample_SPA26.mb.23cbin.1        | 81.32  | 0.000 | 32  |
| Sample_SPA26.Cluster10164cbin.1 | 99.41  | 0.076 | 77  |
| Sample_SPA26.mb.45              | 97.31  | 0.000 | 11  |
| Sample_SPA26.mb.15              | 98.80  | 0.000 | 28  |
| Sample_SPA26.mb.57cbin.1        | 97.31  | 0.020 | 119 |
| Sample_SPA26.mb.37              | 94.63  | 3.125 | 220 |
| Sample_SPA26.mb.54              | 90.62  | 0.000 | 37  |
| Sample_SPA26.mb.83              | 95.08  | 1.442 | 58  |
| Sample_SPA26.mb.78              | 92.61  | 0.000 | 27  |
| Sample_SPA26.mb.80cbin.1        | 98.65  | 0.335 | 46  |

|                                |       |       |     |
|--------------------------------|-------|-------|-----|
| Sample_SPA26.mb.89cbin.1       | 90.73 | 2.854 | 307 |
| Sample_SPA26.mb.74cbin.1       | 97.16 | 1.132 | 219 |
| Sample_SPA26.mb.59             | 96.18 | 0.836 | 116 |
| Sample_SPA26.mb.90             | 93.54 | 1.075 | 191 |
| Sample_SPA26.Cluster3042cbin.1 | 97.67 | 0.808 | 79  |
| Sample_SPA27.Cluster2470cbin.1 | 94.96 | 0.000 | 88  |
| Sample_SPA27.Cluster1062cbin.1 | 96.41 | 0.632 | 44  |
| Sample_SPA27.mb.21cbin.1       | 89.42 | 3.062 | 181 |
| Sample_SPA27.mb.27cbin.1       | 80.52 | 1.360 | 368 |
| Sample_SPA27.Cluster283        | 98.23 | 0.961 | 26  |
| Sample_SPA27.Cluster79cbin.1   | 80.33 | 0.454 | 240 |
| Sample_SPA27.Cluster925cbin.1  | 94.40 | 2.944 | 230 |
| Sample_SPA27.Cluster1827cbin.1 | 96.20 | 0.632 | 64  |
| Sample_SPA27.Cluster213cbin.1  | 96.44 | 0.000 | 88  |
| Sample_SPA27.Cluster2653cbin.1 | 99.51 | 0.483 | 83  |
| Sample_SPA27.Cluster135cbin.1  | 97.53 | 0.000 | 101 |
| Sample_SPA27.mb.37             | 90.09 | 3.197 | 378 |
| Sample_SPA27.mb.19             | 97.46 | 0.116 | 145 |
| Sample_SPA27.Cluster2782cbin.1 | 92.75 | 4.106 | 110 |
| Sample_SPA27.Cluster943        | 96.16 | 4.228 | 73  |
| Sample_SPA27.mb.1              | 93.84 | 0.000 | 61  |
| Sample_SPA27.mb.26             | 97.36 | 4.957 | 233 |
| Sample_SPA27.Cluster2785cbin.1 | 86.21 | 0.877 | 163 |
| Sample_SPA27.mb.25             | 95.47 | 0.769 | 123 |
| Sample_SPA27.Cluster632cbin.1  | 91.39 | 0.117 | 65  |
| Sample_SPA28.Cluster10584      | 92.13 | 1.845 | 16  |
| Sample_SPA28.Cluster9686cbin.1 | 89.09 | 1.342 | 216 |
| Sample_SPA28.mb.87             | 81.89 | 2.586 | 165 |
| Sample_SPA28.mb.17cbin.1       | 81.67 | 1.968 | 230 |
| Sample_SPA28.mb.61             | 91.11 | 3.146 | 428 |
| Sample_SPA28.mb.27             | 95.07 | 1.342 | 107 |
| Sample_SPA28.mb.19             | 95.55 | 1.342 | 128 |
| Sample_SPA28.mb.57             | 98.65 | 0.671 | 35  |
| Sample_SPA28.Cluster5010       | 95.41 | 0.000 | 50  |
| Sample_SPA28.mb.77             | 88.48 | 1.677 | 309 |
| Sample_SPA28.Cluster35cbin.1   | 81.00 | 2.267 | 371 |
| Sample_SPA28.Cluster9763cbin.1 | 91.64 | 0.707 | 74  |
| Sample_SPA28.mb.51             | 93.01 | 3.626 | 72  |
| Sample_SPA28.Cluster3006cbin.1 | 98.88 | 0.000 | 29  |
| Sample_SPA28.Cluster5286       | 88.59 | 0.671 | 14  |
| Sample_SPA28.mb.52             | 96.64 | 0.000 | 111 |
| Sample_SPA28.mb.20cbin.1       | 96.83 | 0.021 | 95  |
| Sample_SPA28.mb.24cbin.1       | 96.64 | 0.000 | 52  |
| Sample_SPA28.Cluster8696cbin.1 | 98.65 | 1.006 | 39  |
| Sample_SPA28.Cluster117        | 94.82 | 1.145 | 173 |
| Sample_SPA28.Cluster5599       | 84.96 | 3.021 | 379 |
| Sample_SPA28.mb.83cbin.1       | 94.36 | 2.900 | 247 |
| Sample_SPA28.Cluster6267cbin.1 | 95.83 | 2.516 | 55  |
| Sample_SPA28.Cluster9539       | 98.65 | 0.167 | 17  |
| Sample_SPA28.mb.21cbin.1       | 98.10 | 1.045 | 56  |
| Sample_SPA28.mb.70cbin.1       | 97.27 | 0.850 | 239 |
| Sample_SPA28.mb.64             | 99.32 | 0.000 | 21  |
| Sample_SPA28.mb.69             | 94.63 | 0.000 | 53  |
| Sample_SPA28.mb.8cbin.1        | 93.73 | 0.632 | 114 |
| Sample_SPA28.mb.37             | 86.28 | 3.035 | 322 |
| Sample_SPA28.mb.73cbin.1       | 87.29 | 0.765 | 582 |
| Sample_SPA30.Cluster12070      | 93.25 | 1.284 | 2   |
| Sample_SPA30.mb.13             | 97.98 | 0.000 | 19  |

|                                 |        |       |     |
|---------------------------------|--------|-------|-----|
| Sample_SPA30.mb.27              | 97.31  | 0.335 | 64  |
| Sample_SPA30.Cluster444cbin.1   | 89.93  | 4.026 | 52  |
| Sample_SPA30.mb.100             | 92.61  | 0.041 | 21  |
| Sample_SPA30.Cluster87cbin.1    | 81.52  | 2.364 | 88  |
| Sample_SPA30.Cluster1140cbin.1  | 96.97  | 0.671 | 95  |
| Sample_SPA30.Cluster372cbin.1   | 90.60  | 2.729 | 87  |
| Sample_SPA30.mb.41              | 97.90  | 1.165 | 75  |
| Sample_SPA30.mb.22              | 84.20  | 1.006 | 38  |
| Sample_SPA30.Cluster5439        | 99.40  | 0.998 | 21  |
| Sample_SPA30.Cluster218cbin.1   | 94.31  | 4.919 | 106 |
| Sample_SPA30.Cluster6069        | 99.98  | 1.497 | 18  |
| Sample_SPA30.Cluster10669cbin.1 | 86.83  | 1.901 | 420 |
| Sample_SPA30.mb.25              | 92.54  | 0.000 | 83  |
| Sample_SPA30.Cluster371cbin.1   | 97.95  | 0.000 | 23  |
| Sample_SPA30.mb.102cbin.1       | 94.58  | 1.845 | 50  |
| Sample_SPA30.Cluster5550cbin.1  | 99.32  | 1.689 | 88  |
| Sample_SPA30.Cluster7309cbin.1  | 96.57  | 0.000 | 59  |
| Sample_SPA30.Cluster3188cbin.1  | 97.46  | 1.242 | 289 |
| Sample_SPA30.Cluster11505cbin.1 | 95.56  | 0.632 | 75  |
| Sample_SPA30.Cluster4953        | 96.93  | 2.230 | 67  |
| Sample_SPA30.mb.63cbin.1        | 96.64  | 0.335 | 38  |
| Sample_SPA30.mb.80              | 83.17  | 0.671 | 287 |
| Sample_SPA30.mb.50              | 93.98  | 1.610 | 119 |
| Sample_SPA30.Cluster6094        | 98.07  | 0.384 | 41  |
| Sample_SPA30.mb.14cbin.1        | 95.89  | 1.127 | 116 |
| Sample_SPA31.Cluster8294cbin.1  | 88.20  | 3.370 | 54  |
| Sample_SPA31.mb.47              | 93.33  | 4.000 | 34  |
| Sample_SPA31.mb.15              | 94.75  | 1.075 | 197 |
| Sample_SPA31.mb.57cbin.1        | 96.37  | 2.150 | 134 |
| Sample_SPA31.Cluster1487cbin.1  | 83.50  | 2.125 | 390 |
| Sample_SPA31.mb.11cbin.1        | 87.58  | 0.671 | 65  |
| Sample_SPA31.mb.74              | 93.60  | 2.013 | 59  |
| Sample_SPA31.Cluster403cbin.1   | 97.07  | 0.806 | 81  |
| Sample_SPA31.Cluster110         | 100.00 | 0.000 | 104 |
| Sample_SPA31.mb.69              | 89.59  | 0.223 | 65  |
| Sample_SPA31.Cluster5253cbin.1  | 96.40  | 1.006 | 36  |
| Sample_SPA31.Cluster2324cbin.1  | 93.24  | 2.147 | 93  |
| Sample_SPA31.mb.40              | 89.66  | 1.442 | 63  |
| Sample_SPA31.mb.45cbin.1        | 91.94  | 1.342 | 182 |
| Sample_SPA31.Cluster4489cbin.1  | 95.30  | 2.013 | 74  |
| Sample_SPA31.mb.62              | 94.29  | 0.671 | 118 |
| Sample_SPA31.Cluster5882cbin.1  | 97.09  | 1.342 | 23  |
| Sample_SPA31.Cluster7476        | 98.29  | 0.261 | 97  |
| Sample_SPA31.Cluster6198        | 96.57  | 0.000 | 34  |
| Sample_SPA31.mb.79cbin.1        | 91.45  | 1.342 | 243 |
| Sample_SPA31.mb.83              | 87.98  | 0.000 | 15  |
| Sample_SPA31.mb.2cbin.1         | 98.83  | 0.584 | 81  |
| Sample_SPA31.mb.68              | 95.43  | 3.125 | 32  |
| Sample_SPA31.mb.7cbin.1         | 96.22  | 4.716 | 151 |
| Sample_SPA31.mb.60cbin.1        | 98.73  | 1.898 | 247 |
| Sample_SPA31.Cluster5757        | 98.88  | 0.743 | 59  |
| Sample_SPA31.mb.67              | 95.18  | 0.384 | 90  |
| Sample_SPA31.mb.82cbin.1        | 97.88  | 1.993 | 73  |
| Sample_SPA31.mb.56cbin.1        | 95.20  | 0.737 | 191 |
| Sample_SPA32.mb.10              | 93.54  | 0.000 | 48  |
| Sample_SPA32.Cluster8317cbin.1  | 98.65  | 1.342 | 10  |
| Sample_SPA32.Cluster6554        | 84.56  | 0.000 | 41  |
| Sample_SPA32.Cluster5430cbin.1  | 98.65  | 0.671 | 62  |



|                                 |       |       |     |
|---------------------------------|-------|-------|-----|
| Sample_SPA32.mb.41cbin.1        | 84.86 | 1.677 | 328 |
| Sample_SPA32.Cluster831cbin.1   | 97.31 | 0.000 | 49  |
| Sample_SPA32.Cluster3859        | 83.69 | 0.483 | 18  |
| Sample_SPA32.Cluster1745        | 96.83 | 0.000 | 45  |
| Sample_SPA32.mb.13              | 90.66 | 1.139 | 80  |
| Sample_SPA32.mb.59cbin.1        | 84.22 | 0.671 | 134 |
| Sample_SPA32.mb.79cbin.1        | 88.70 | 2.578 | 253 |
| Sample_SPA32.Cluster317cbin.1   | 99.54 | 1.969 | 75  |
| Sample_SPA32.mb.58cbin.1        | 91.44 | 1.956 | 230 |
| Sample_SPA32.mb.80              | 93.95 | 0.000 | 61  |
| Sample_SPA32.mb.53              | 96.13 | 1.932 | 73  |
| Sample_SPA32.mb.2cbin.1         | 96.12 | 2.348 | 191 |
| Sample_SPA32.mb.21              | 86.45 | 4.430 | 66  |
| Sample_SPA32.mb.29cbin.1        | 97.31 | 2.147 | 119 |
| Sample_SPA32.mb.57              | 99.03 | 0.000 | 24  |
| Sample_SPA32.mb.67cbin.1        | 95.46 | 0.000 | 226 |
| Sample_SPA32.Cluster37cbin.1    | 94.55 | 1.612 | 344 |
| Sample_SPA32.mb.35              | 93.17 | 3.639 | 114 |
| Sample_SPA32.mb.99cbin.1        | 96.31 | 0.961 | 25  |
| Sample_SPA32.mb.75              | 92.08 | 2.272 | 263 |
| Sample_SPA32.mb.92              | 94.64 | 0.483 | 327 |
| Sample_SPA32.mb.55cbin.1        | 98.46 | 0.690 | 49  |
| Sample_SPA34.Cluster14210       | 92.69 | 2.247 | 38  |
| Sample_SPA34.Cluster14283cbin.1 | 81.46 | 3.370 | 38  |
| Sample_SPA34.Cluster13844       | 88.88 | 0.854 | 20  |
| Sample_SPA34.Cluster13142cbin.1 | 95.19 | 1.677 | 190 |
| Sample_SPA34.Cluster236cbin.1   | 93.28 | 2.460 | 82  |
| Sample_SPA34.Cluster5308cbin.1  | 91.56 | 2.292 | 215 |
| Sample_SPA34.Cluster10977cbin.1 | 92.40 | 3.006 | 236 |
| Sample_SPA34.mb.100             | 85.23 | 0.894 | 45  |
| Sample_SPA34.Cluster2863        | 88.70 | 0.480 | 22  |
| Sample_SPA34.mb.104             | 92.63 | 0.671 | 67  |
| Sample_SPA34.Cluster3950cbin.1  | 97.31 | 0.000 | 21  |
| Sample_SPA34.mb.10cbin.1        | 95.74 | 1.342 | 46  |
| Sample_SPA34.mb.27cbin.1        | 94.18 | 0.000 | 97  |
| Sample_SPA34.Cluster1738cbin.1  | 96.87 | 0.625 | 180 |
| Sample_SPA34.mb.47              | 85.62 | 3.146 | 239 |
| Sample_SPA34.Cluster2567        | 97.95 | 0.680 | 29  |
| Sample_SPA34.mb.57cbin.1        | 96.10 | 2.083 | 156 |
| Sample_SPA34.Cluster8839        | 97.98 | 0.671 | 18  |
| Sample_SPA34.mb.106cbin.1       | 86.84 | 0.692 | 333 |
| Sample_SPA34.Cluster10225       | 93.96 | 0.075 | 35  |
| Sample_SPA34.mb.105cbin.1       | 96.64 | 0.335 | 29  |
| Sample_SPA34.mb.113             | 89.93 | 0.000 | 16  |
| Sample_SPA34.mb.40              | 89.93 | 0.671 | 50  |
| Sample_SPA34.mb.21              | 95.22 | 0.000 | 182 |
| Sample_SPA34.Cluster17cbin.1    | 96.82 | 1.612 | 355 |
| Sample_SPA34.mb.55              | 80.73 | 0.533 | 240 |
| Sample_SPA34.mb.62              | 86.56 | 3.747 | 134 |
| Sample_SPA34.mb.102             | 92.78 | 0.016 | 20  |
| Sample_SPA34.mb.93              | 82.43 | 0.000 | 43  |
| Sample_SPA34.mb.53              | 89.22 | 0.000 | 140 |
| Sample_SPA34.mb.94cbin.1        | 97.20 | 1.515 | 126 |
| Sample_SPA34.mb.83              | 88.27 | 1.363 | 150 |
| Sample_SPA34.mb.72cbin.1        | 90.60 | 3.355 | 99  |
| Sample_SPA34.Cluster4722cbin.1  | 95.51 | 2.564 | 364 |
| Sample_SPA34.Cluster6895cbin.1  | 98.21 | 0.495 | 62  |
| Sample_SPA34.mb.79              | 87.97 | 1.342 | 197 |

|                                 |        |       |     |
|---------------------------------|--------|-------|-----|
| Sample_SPA34.Cluster8898cbin.1  | 95.25  | 0.939 | 158 |
| Sample_SPA34.mb.90cbin.1        | 95.84  | 1.449 | 115 |
| Sample_SPA34.mb.92              | 99.32  | 0.671 | 50  |
| Sample_SPA34.mb.97              | 93.28  | 1.342 | 165 |
| Sample_SPA34.mb.56cbin.1        | 99.46  | 0.537 | 110 |
| Sample_SPA34.mb.61cbin.1        | 86.91  | 1.022 | 86  |
| Sample_SPA34.Cluster1818        | 99.10  | 0.112 | 28  |
| Sample_SPA35.Cluster18259       | 92.41  | 3.370 | 34  |
| Sample_SPA35.Cluster17834cbin.1 | 81.91  | 2.331 | 19  |
| Sample_SPA35.Cluster14601       | 97.76  | 1.230 | 44  |
| Sample_SPA35.Cluster14221cbin.1 | 94.79  | 2.055 | 142 |
| Sample_SPA35.mb.100cbin.1       | 93.54  | 2.471 | 219 |
| Sample_SPA35.Cluster9708        | 89.46  | 0.671 | 8   |
| Sample_SPA35.mb.113             | 94.81  | 0.635 | 154 |
| Sample_SPA35.Cluster432         | 81.94  | 1.565 | 102 |
| Sample_SPA35.mb.10              | 91.94  | 0.000 | 37  |
| Sample_SPA35.mb.32              | 88.23  | 0.940 | 119 |
| Sample_SPA35.mb.22              | 96.77  | 0.000 | 33  |
| Sample_SPA35.Cluster16310cbin.1 | 92.38  | 3.001 | 289 |
| Sample_SPA35.mb.103cbin.1       | 86.69  | 2.223 | 212 |
| Sample_SPA35.mb.47              | 90.45  | 0.000 | 22  |
| Sample_SPA35.Cluster13092       | 97.09  | 0.000 | 24  |
| Sample_SPA35.Cluster1826cbin.1  | 96.96  | 0.000 | 57  |
| Sample_SPA35.mb.66              | 83.42  | 0.000 | 123 |
| Sample_SPA35.mb.46              | 92.76  | 1.881 | 443 |
| Sample_SPA35.Cluster4290cbin.1  | 92.91  | 3.935 | 180 |
| Sample_SPA35.mb.50              | 83.28  | 1.398 | 410 |
| Sample_SPA35.Cluster3665        | 97.27  | 0.000 | 24  |
| Sample_SPA35.mb.65cbin.1        | 86.17  | 0.894 | 334 |
| Sample_SPA35.mb.71cbin.1        | 87.06  | 2.797 | 29  |
| Sample_SPA35.mb.102cbin.1       | 96.64  | 0.000 | 57  |
| Sample_SPA35.mb.30              | 96.77  | 1.612 | 56  |
| Sample_SPA35.mb.40cbin.1        | 94.26  | 3.355 | 138 |
| Sample_SPA35.mb.49              | 88.49  | 3.355 | 96  |
| Sample_SPA35.mb.58              | 85.06  | 0.838 | 204 |
| Sample_SPA35.mb.23              | 100.00 | 0.000 | 28  |
| Sample_SPA35.mb.3cbin.1         | 81.43  | 4.854 | 95  |
| Sample_SPA35.mb.25              | 94.07  | 3.579 | 184 |
| Sample_SPA35.mb.75cbin.1        | 85.77  | 2.109 | 325 |
| Sample_SPA35.mb.114cbin.1       | 98.65  | 1.090 | 133 |
| Sample_SPA35.mb.59              | 96.64  | 0.805 | 46  |
| Sample_SPA35.mb.73              | 83.94  | 1.530 | 356 |
| Sample_SPA35.mb.60cbin.1        | 99.54  | 0.000 | 14  |
| Sample_SPA35.mb.87              | 89.70  | 4.474 | 279 |
| Sample_SPA35.mb.93              | 95.04  | 0.781 | 95  |
| Sample_SPA35.mb.98cbin.1        | 88.44  | 4.706 | 477 |
| Sample_SPA35.Cluster1466        | 98.80  | 0.074 | 30  |
| Sample_SPA36.Cluster12603       | 98.66  | 0.111 | 11  |
| Sample_SPA36.mb.2               | 94.35  | 1.075 | 67  |
| Sample_SPA36.Cluster108         | 85.23  | 0.671 | 21  |
| Sample_SPA36.mb.40              | 88.69  | 0.774 | 128 |
| Sample_SPA36.Cluster1221cbin.1  | 88.28  | 2.348 | 80  |
| Sample_SPA36.mb.19cbin.1        | 80.27  | 1.740 | 401 |
| Sample_SPA36.Cluster1524cbin.1  | 88.28  | 1.102 | 147 |
| Sample_SPA36.Cluster1295cbin.1  | 93.73  | 1.342 | 87  |
| Sample_SPA36.Cluster5207cbin.1  | 92.91  | 1.026 | 107 |
| Sample_SPA36.mb.61              | 86.62  | 0.769 | 384 |
| Sample_SPA36.mb.20              | 87.43  | 4.935 | 154 |

|                                 |        |       |     |
|---------------------------------|--------|-------|-----|
| Sample_SPA36.Cluster6225cbin.1  | 94.63  | 0.335 | 79  |
| Sample_SPA36.mb.13cbin.1        | 89.26  | 0.000 | 34  |
| Sample_SPA36.Cluster8708cbin.1  | 98.99  | 0.000 | 69  |
| Sample_SPA36.Cluster10796       | 98.65  | 0.000 | 21  |
| Sample_SPA36.Cluster5539cbin.1  | 83.15  | 1.449 | 168 |
| Sample_SPA36.Cluster12513       | 100.00 | 0.000 | 19  |
| Sample_SPA36.Cluster3422        | 96.37  | 0.671 | 30  |
| Sample_SPA36.mb.44cbin.1        | 98.55  | 2.013 | 79  |
| Sample_SPA36.Cluster9710        | 99.32  | 0.671 | 19  |
| Sample_SPA36.mb.62              | 85.72  | 2.430 | 438 |
| Sample_SPA36.Cluster41          | 100.00 | 0.000 | 24  |
| Sample_SPA36.mb.31              | 99.32  | 0.000 | 20  |
| Sample_SPA36.mb.28cbin.1        | 93.91  | 0.000 | 18  |
| Sample_SPA36.mb.18cbin.1        | 93.28  | 2.013 | 109 |
| Sample_SPA36.mb.27              | 97.95  | 0.680 | 38  |
| Sample_SPA36.mb.36              | 97.31  | 0.000 | 22  |
| Sample_SPA36.Cluster10253cbin.1 | 98.64  | 1.689 | 87  |
| Sample_SPA36.Cluster1302cbin.1  | 84.10  | 3.528 | 250 |
| Sample_SPA36.mb.43              | 95.26  | 2.891 | 115 |
| Sample_SPA36.mb.7cbin.1         | 87.03  | 2.257 | 291 |
| Sample_SPA36.mb.68              | 97.60  | 1.097 | 54  |
| Sample_SPA36.mb.83cbin.1        | 86.07  | 0.632 | 57  |
| Sample_SPA36.mb.81              | 97.50  | 0.512 | 92  |
| Sample_SPA37.Cluster17704       | 87.07  | 2.808 | 30  |
| Sample_SPA37.Cluster17805       | 92.41  | 1.123 | 19  |
| Sample_SPA37.mb.113             | 88.48  | 0.000 | 18  |
| Sample_SPA37.mb.2               | 95.29  | 0.000 | 38  |
| Sample_SPA37.mb.41              | 88.20  | 1.284 | 38  |
| Sample_SPA37.mb.25              | 93.93  | 2.684 | 31  |
| Sample_SPA37.Cluster340cbin.1   | 82.77  | 2.617 | 295 |
| Sample_SPA37.mb.32              | 92.17  | 0.671 | 23  |
| Sample_SPA37.Cluster3961        | 93.75  | 2.804 | 35  |
| Sample_SPA37.Cluster15419cbin.1 | 97.58  | 0.335 | 40  |
| Sample_SPA37.mb.78cbin.1        | 94.42  | 3.091 | 188 |
| Sample_SPA37.Cluster6548        | 97.04  | 0.000 | 26  |
| Sample_SPA37.mb.16cbin.1        | 94.32  | 0.000 | 81  |
| Sample_SPA37.Cluster144cbin.1   | 80.30  | 4.370 | 318 |
| Sample_SPA37.Cluster11952cbin.1 | 83.87  | 0.768 | 406 |
| Sample_SPA37.Cluster18          | 93.48  | 1.303 | 316 |
| Sample_SPA37.mb.61              | 94.74  | 0.671 | 82  |
| Sample_SPA37.mb.69              | 99.32  | 2.055 | 145 |
| Sample_SPA37.mb.1               | 94.97  | 2.445 | 270 |
| Sample_SPA37.Cluster6932cbin.1  | 99.34  | 0.949 | 53  |
| Sample_SPA37.mb.40              | 97.98  | 1.006 | 37  |
| Sample_SPA37.mb.30              | 93.99  | 0.480 | 37  |
| Sample_SPA37.mb.108cbin.1       | 97.07  | 1.754 | 88  |
| Sample_SPA37.mb.8               | 97.09  | 1.923 | 227 |
| Sample_SPA37.Cluster8131cbin.1  | 83.51  | 2.939 | 832 |
| Sample_SPA37.mb.60cbin.1        | 99.35  | 2.898 | 135 |
| Sample_SPA37.mb.72              | 99.11  | 0.591 | 271 |
| Sample_SPA37.mb.75              | 98.86  | 1.509 | 42  |
| Sample_SPA37.Cluster15692cbin.1 | 96.92  | 3.719 | 94  |
| Sample_SPA37.mb.11cbin.1        | 93.24  | 4.679 | 486 |
| Sample_SPA37.mb.94              | 98.12  | 0.349 | 76  |
| Sample_SPA38.Cluster1699        | 90.82  | 1.342 | 90  |
| Sample_SPA38.Cluster605         | 88.59  | 2.348 | 42  |
| Sample_SPA38.Cluster9283cbin.1  | 92.72  | 0.969 | 224 |
| Sample_SPA38.Cluster9cbin.1     | 88.47  | 3.041 | 265 |

|                                 |        |       |     |
|---------------------------------|--------|-------|-----|
| Sample_SPA38.Cluster11102       | 99.32  | 1.006 | 15  |
| Sample_SPA38.Cluster7150        | 99.98  | 1.497 | 25  |
| Sample_SPA38.Cluster647cbin.1   | 96.59  | 0.000 | 248 |
| Sample_SPA38.Cluster3464        | 100.00 | 0.000 | 23  |
| Sample_SPA38.mb.113             | 97.58  | 2.016 | 86  |
| Sample_SPA38.Cluster14202cbin.1 | 90.01  | 2.215 | 162 |
| Sample_SPA38.mb.101cbin.1       | 93.62  | 0.000 | 56  |
| Sample_SPA38.mb.26cbin.1        | 93.77  | 0.632 | 183 |
| Sample_SPA38.mb.133             | 93.75  | 0.961 | 35  |
| Sample_SPA38.Cluster11496cbin.1 | 92.87  | 3.128 | 367 |
| Sample_SPA38.mb.134             | 94.63  | 0.000 | 20  |
| Sample_SPA38.Cluster8789cbin.1  | 98.79  | 0.579 | 171 |
| Sample_SPA38.mb.3cbin.1         | 86.80  | 1.342 | 58  |
| Sample_SPA38.mb.57cbin.1        | 93.17  | 1.324 | 143 |
| Sample_SPA38.mb.88              | 95.69  | 0.000 | 56  |
| Sample_SPA38.Cluster5590cbin.1  | 98.74  | 0.371 | 51  |
| Sample_SPA38.mb.38              | 98.07  | 0.961 | 34  |
| Sample_SPA38.mb.71cbin.1        | 91.71  | 3.355 | 75  |
| Sample_SPA38.mb.103cbin.1       | 97.66  | 2.317 | 137 |
| Sample_SPA38.mb.66              | 87.39  | 1.587 | 192 |
| Sample_SPA38.mb.70              | 85.99  | 1.677 | 238 |
| Sample_SPA38.mb.40cbin.1        | 80.11  | 0.062 | 58  |
| Sample_SPA38.mb.87cbin.1        | 88.59  | 2.684 | 146 |
| Sample_SPA38.mb.31cbin.1        | 99.24  | 0.000 | 19  |
| Sample_SPA38.mb.111cbin.1       | 99.23  | 0.512 | 73  |
| Sample_SPA38.mb.91              | 95.82  | 3.834 | 79  |
| Sample_SPA38.mb.74cbin.1        | 96.70  | 0.000 | 34  |
| Sample_SPA38.mb.97cbin.1        | 100.00 | 0.513 | 55  |
| Sample_SPA38.mb.124cbin.1       | 98.69  | 0.769 | 129 |
| Sample_SPA38.mb.80cbin.1        | 82.36  | 1.240 | 190 |
| Sample_SPA38.mb.41cbin.1        | 88.59  | 0.929 | 43  |
| Sample_SPA38.mb.64              | 88.76  | 1.132 | 177 |
| Sample_SPA39.mb.115             | 92.41  | 2.247 | 27  |
| Sample_SPA39.Cluster11734cbin.1 | 91.05  | 2.189 | 49  |
| Sample_SPA39.Cluster251cbin.1   | 91.94  | 0.000 | 34  |
| Sample_SPA39.mb.108             | 87.99  | 0.066 | 205 |
| Sample_SPA39.Cluster4992        | 93.88  | 2.974 | 28  |
| Sample_SPA39.Cluster569cbin.1   | 97.31  | 0.671 | 45  |
| Sample_SPA39.mb.134             | 96.50  | 1.165 | 73  |
| Sample_SPA39.Cluster11372cbin.1 | 97.30  | 0.707 | 102 |
| Sample_SPA39.mb.135             | 90.59  | 2.702 | 199 |
| Sample_SPA39.Cluster1834cbin.1  | 95.67  | 0.961 | 44  |
| Sample_SPA39.Cluster8588cbin.1  | 99.78  | 4.540 | 122 |
| Sample_SPA39.mb.12              | 90.86  | 1.728 | 72  |
| Sample_SPA39.Cluster3838        | 96.93  | 0.000 | 11  |
| Sample_SPA39.Cluster11266       | 97.42  | 1.151 | 134 |
| Sample_SPA39.mb.30cbin.1        | 96.77  | 0.000 | 25  |
| Sample_SPA39.Cluster6116cbin.1  | 96.64  | 4.697 | 17  |
| Sample_SPA39.Cluster65cbin.1    | 94.25  | 0.833 | 79  |
| Sample_SPA39.mb.102cbin.1       | 98.73  | 3.186 | 93  |
| Sample_SPA39.mb.29              | 92.56  | 0.675 | 110 |
| Sample_SPA39.Cluster366         | 95.65  | 0.155 | 31  |
| Sample_SPA39.mb.100cbin.1       | 90.05  | 2.995 | 110 |
| Sample_SPA39.mb.27              | 98.38  | 0.953 | 21  |
| Sample_SPA39.Cluster2121        | 100.00 | 0.000 | 37  |
| Sample_SPA39.mb.119             | 92.53  | 0.240 | 30  |
| Sample_SPA39.mb.58cbin.1        | 97.31  | 3.914 | 222 |
| Sample_SPA39.mb.33              | 86.51  | 4.905 | 470 |

|                                 |        |       |     |
|---------------------------------|--------|-------|-----|
| Sample_SPA39.mb.128cbin.1       | 94.60  | 0.606 | 44  |
| Sample_SPA39.Cluster8650cbin.1  | 99.03  | 0.000 | 99  |
| Sample_SPA39.mb.136             | 98.65  | 0.000 | 21  |
| Sample_SPA39.mb.46cbin.1        | 94.63  | 0.000 | 141 |
| Sample_SPA39.mb.113             | 98.52  | 2.483 | 136 |
| Sample_SPA39.mb.47              | 92.49  | 0.671 | 43  |
| Sample_SPA39.mb.64              | 95.15  | 0.671 | 220 |
| Sample_SPA39.mb.6               | 95.30  | 1.698 | 56  |
| Sample_SPA39.mb.49cbin.1        | 97.03  | 0.680 | 228 |
| Sample_SPA39.mb.122cbin.1       | 86.55  | 0.555 | 501 |
| Sample_SPA39.Cluster4019        | 98.41  | 1.740 | 110 |
| Sample_SPA39.mb.40              | 98.63  | 0.000 | 40  |
| Sample_SPA39.Cluster6486cbin.1  | 98.84  | 0.000 | 48  |
| Sample_SPA39.mb.68              | 81.37  | 0.000 | 31  |
| Sample_SPA39.mb.81              | 80.53  | 1.530 | 66  |
| Sample_SPA39.Cluster6261        | 97.24  | 3.082 | 104 |
| Sample_SPA39.mb.89cbin.1        | 99.24  | 0.000 | 43  |
| Sample_SPA39.mb.80cbin.1        | 99.36  | 0.632 | 52  |
| Sample_SPA39.mb.99cbin.1        | 89.67  | 0.480 | 37  |
| Sample_SPA39.mb.96              | 91.82  | 2.593 | 82  |
| Sample_SPA39.mb.34cbin.1        | 98.65  | 0.128 | 145 |
| Sample_SPA41.Cluster6557cbin.1  | 97.55  | 4.838 | 18  |
| Sample_SPA41.Cluster455cbin.1   | 98.38  | 1.075 | 50  |
| Sample_SPA41.Cluster5568        | 92.59  | 1.677 | 21  |
| Sample_SPA41.mb.21              | 83.78  | 0.000 | 114 |
| Sample_SPA41.mb.11              | 95.29  | 0.745 | 210 |
| Sample_SPA41.mb.25cbin.1        | 97.98  | 0.000 | 49  |
| Sample_SPA41.Cluster9759        | 97.90  | 0.000 | 24  |
| Sample_SPA41.Cluster11858       | 93.60  | 0.800 | 152 |
| Sample_SPA41.Cluster519         | 80.53  | 3.691 | 35  |
| Sample_SPA41.mb.12              | 86.03  | 0.671 | 185 |
| Sample_SPA41.Cluster10261cbin.1 | 92.58  | 0.842 | 80  |
| Sample_SPA41.Cluster6650cbin.1  | 99.18  | 0.000 | 23  |
| Sample_SPA41.Cluster395cbin.1   | 88.03  | 3.691 | 332 |
| Sample_SPA41.Cluster11436       | 100.00 | 0.000 | 41  |
| Sample_SPA41.Cluster135cbin.1   | 89.59  | 3.389 | 288 |
| Sample_SPA41.Cluster8883cbin.1  | 92.02  | 2.267 | 210 |
| Sample_SPA41.mb.28              | 98.55  | 1.545 | 36  |
| Sample_SPA41.mb.64              | 84.22  | 0.671 | 434 |
| Sample_SPA41.Cluster10322cbin.1 | 97.64  | 0.000 | 118 |
| Sample_SPA41.mb.40              | 84.47  | 1.190 | 161 |
| Sample_SPA41.mb.52              | 82.55  | 2.930 | 155 |
| Sample_SPA41.Cluster9423        | 99.58  | 0.070 | 23  |
| Sample_SPA41.Cluster9689        | 99.32  | 0.335 | 31  |
| Sample_SPA41.Cluster334cbin.1   | 89.54  | 0.000 | 26  |
| Sample_SPA41.mb.41              | 80.74  | 1.723 | 286 |
| Sample_SPA41.mb.110cbin.1       | 97.30  | 3.797 | 101 |
| Sample_SPA41.mb.50cbin.1        | 93.00  | 0.671 | 108 |
| Sample_SPA41.mb.88              | 85.79  | 0.158 | 74  |
| Sample_SPA41.mb.62cbin.1        | 90.93  | 2.684 | 129 |
| Sample_SPA41.mb.51cbin.1        | 94.49  | 0.671 | 79  |
| Sample_SPA41.mb.55cbin.1        | 93.89  | 2.013 | 312 |
| Sample_SPA41.mb.7cbin.1         | 92.28  | 4.758 | 57  |
| Sample_SPA41.mb.92cbin.1        | 89.32  | 1.228 | 295 |
| Sample_SPA41.mb.71              | 97.07  | 0.877 | 74  |
| Sample_SPA41.Cluster5952        | 98.87  | 0.626 | 112 |
| Sample_SPA41.Cluster7247        | 99.25  | 0.000 | 35  |
| Sample_SPA41.Cluster4243cbin.1  | 97.92  | 1.336 | 153 |

|                                 |       |       |     |
|---------------------------------|-------|-------|-----|
| Sample_SPA42.mb.113             | 88.31 | 0.268 | 120 |
| Sample_SPA42.mb.44              | 89.50 | 2.150 | 348 |
| Sample_SPA42.Cluster102cbin.1   | 92.37 | 3.187 | 112 |
| Sample_SPA42.Cluster500         | 93.28 | 3.187 | 133 |
| Sample_SPA42.Cluster5135cbin.1  | 93.95 | 0.000 | 53  |
| Sample_SPA42.Cluster16495cbin.1 | 93.66 | 1.650 | 142 |
| Sample_SPA42.mb.23              | 89.07 | 1.654 | 287 |
| Sample_SPA42.Cluster5583cbin.1  | 96.65 | 0.000 | 48  |
| Sample_SPA42.mb.32cbin.1        | 93.91 | 3.603 | 83  |
| Sample_SPA42.Cluster10090       | 97.09 | 0.000 | 21  |
| Sample_SPA42.mb.75cbin.1        | 93.95 | 2.016 | 46  |
| Sample_SPA42.mb.107cbin.1       | 99.32 | 1.006 | 52  |
| Sample_SPA42.mb.72cbin.1        | 97.84 | 0.000 | 68  |
| Sample_SPA42.mb.29cbin.1        | 84.30 | 3.392 | 311 |
| Sample_SPA42.Cluster634         | 99.55 | 1.407 | 28  |
| Sample_SPA42.Cluster9771cbin.1  | 84.68 | 3.216 | 371 |
| Sample_SPA42.mb.82cbin.1        | 89.26 | 1.250 | 49  |
| Sample_SPA42.mb.53cbin.1        | 95.30 | 0.000 | 78  |
| Sample_SPA42.mb.4cbin.1         | 84.82 | 3.962 | 305 |
| Sample_SPA42.mb.33cbin.1        | 98.75 | 1.242 | 81  |
| Sample_SPA42.mb.64cbin.1        | 93.64 | 1.174 | 186 |
| Sample_SPA42.mb.73cbin.1        | 96.15 | 0.000 | 82  |
| Sample_SPA42.mb.74              | 96.63 | 3.125 | 27  |
| Sample_SPA42.Cluster10643cbin.1 | 93.03 | 2.736 | 285 |
| Sample_SPA42.mb.88cbin.1        | 97.91 | 0.576 | 59  |
| Sample_SPA42.mb.85              | 97.64 | 0.000 | 80  |
| Sample_SPA42.mb.7               | 99.62 | 0.000 | 16  |
| Sample_SPA42.mb.78cbin.1        | 82.52 | 1.720 | 569 |
| Sample_SPA42.mb.77              | 83.28 | 2.661 | 364 |
| Sample_SPA45.Cluster4144        | 87.54 | 0.000 | 15  |
| Sample_SPA45.Cluster5872        | 96.30 | 0.000 | 66  |
| Sample_SPA45.Cluster669cbin.1   | 93.95 | 2.348 | 97  |
| Sample_SPA45.mb.122cbin.1       | 89.00 | 2.531 | 112 |
| Sample_SPA45.mb.18cbin.1        | 96.94 | 1.677 | 117 |
| Sample_SPA45.Cluster12792cbin.1 | 90.37 | 0.000 | 413 |
| Sample_SPA45.mb.22cbin.1        | 86.68 | 0.223 | 46  |
| Sample_SPA45.Cluster7259cbin.1  | 93.73 | 0.000 | 75  |
| Sample_SPA45.Cluster9319        | 99.32 | 1.006 | 20  |
| Sample_SPA45.mb.105cbin.1       | 95.49 | 1.698 | 284 |
| Sample_SPA45.mb.26              | 99.19 | 0.604 | 34  |
| Sample_SPA45.Cluster5932cbin.1  | 98.98 | 1.745 | 94  |
| Sample_SPA45.Cluster10018cbin.1 | 91.47 | 0.724 | 266 |
| Sample_SPA45.mb.45cbin.1        | 88.25 | 0.000 | 19  |
| Sample_SPA45.Cluster8060cbin.1  | 84.95 | 1.026 | 295 |
| Sample_SPA45.mb.117cbin.1       | 91.52 | 1.169 | 146 |
| Sample_SPA45.mb.67              | 99.30 | 0.932 | 79  |
| Sample_SPA45.mb.56              | 95.35 | 2.215 | 168 |
| Sample_SPA45.mb.101             | 92.98 | 1.169 | 54  |
| Sample_SPA45.mb.65              | 96.64 | 0.335 | 79  |
| Sample_SPA45.mb.23cbin.1        | 88.39 | 4.529 | 220 |
| Sample_SPA45.mb.86              | 97.20 | 2.684 | 106 |
| Sample_SPA45.mb.70              | 81.86 | 3.888 | 424 |
| Sample_SPA45.mb.59cbin.1        | 87.80 | 1.542 | 244 |
| Sample_SPA45.mb.8cbin.1         | 97.31 | 1.006 | 38  |
| Sample_SPA45.mb.48cbin.1        | 94.63 | 0.671 | 24  |
| Sample_SPA45.mb.71cbin.1        | 95.56 | 1.898 | 101 |
| Sample_SPA45.Cluster3337cbin.1  | 95.44 | 3.481 | 558 |
| Sample_SPA45.mb.37              | 93.11 | 4.975 | 43  |

|                                 |        |       |     |
|---------------------------------|--------|-------|-----|
| Sample_SPA45.Cluster5564        | 96.10  | 0.384 | 93  |
| Sample_SPA45.mb.73cbin.1        | 98.92  | 0.806 | 46  |
| Sample_SPA45.mb.93              | 94.60  | 1.825 | 64  |
| Sample_SPA45.mb.104cbin.1       | 97.45  | 1.486 | 115 |
| Sample_SPA45.mb.85cbin.1        | 98.20  | 1.197 | 85  |
| Sample_SPA45.mb.82cbin.1        | 98.80  | 0.800 | 174 |
| Sample_SPA45.mb.72              | 95.34  | 1.789 | 84  |
| Sample_SPA45.mb.90              | 95.91  | 0.226 | 72  |
| Sample_SPA45.mb.98cbin.1        | 95.43  | 0.549 | 213 |
| Sample_SPA45.mb.91              | 98.11  | 0.000 | 91  |
| Sample_SPA45.mb.87              | 85.27  | 1.165 | 346 |
| Sample_SPA45.mb.61              | 93.38  | 0.913 | 299 |
| Sample_SPA45.mb.5cbin.1         | 89.23  | 0.576 | 97  |
| Sample_SPA45.mb.95cbin.1        | 99.59  | 0.165 | 73  |
| Sample_SPA47.Cluster11721       | 90.44  | 3.932 | 19  |
| Sample_SPA47.Cluster4099        | 96.62  | 0.000 | 5   |
| Sample_SPA47.Cluster10668cbin.1 | 95.97  | 4.250 | 309 |
| Sample_SPA47.Cluster8596cbin.1  | 95.74  | 0.671 | 73  |
| Sample_SPA47.Cluster8125cbin.1  | 95.60  | 0.000 | 28  |
| Sample_SPA47.Cluster10912cbin.1 | 89.75  | 0.842 | 110 |
| Sample_SPA47.Cluster5842cbin.1  | 91.58  | 1.677 | 229 |
| Sample_SPA47.Cluster54cbin.1    | 94.21  | 2.013 | 269 |
| Sample_SPA47.Cluster5816        | 89.82  | 0.798 | 12  |
| Sample_SPA47.Cluster344cbin.1   | 92.61  | 3.020 | 111 |
| Sample_SPA47.Cluster1713cbin.1  | 97.31  | 1.132 | 10  |
| Sample_SPA47.Cluster251cbin.1   | 95.05  | 2.176 | 104 |
| Sample_SPA47.mb.31              | 93.54  | 0.806 | 37  |
| Sample_SPA47.mb.119cbin.1       | 94.89  | 0.115 | 150 |
| Sample_SPA47.Cluster268         | 96.25  | 1.250 | 19  |
| Sample_SPA47.Cluster8012        | 95.30  | 1.006 | 20  |
| Sample_SPA47.mb.102             | 90.28  | 0.806 | 101 |
| Sample_SPA47.mb.103cbin.1       | 97.96  | 0.000 | 40  |
| Sample_SPA47.mb.117             | 94.63  | 1.342 | 38  |
| Sample_SPA47.Cluster903         | 98.75  | 0.625 | 22  |
| Sample_SPA47.Cluster980         | 95.00  | 3.712 | 18  |
| Sample_SPA47.Cluster10cbin.1    | 92.61  | 2.860 | 168 |
| Sample_SPA47.mb.112cbin.1       | 94.72  | 1.530 | 249 |
| Sample_SPA47.Cluster310cbin.1   | 95.74  | 0.480 | 44  |
| Sample_SPA47.mb.16              | 91.94  | 0.671 | 51  |
| Sample_SPA47.mb.30cbin.1        | 88.25  | 0.000 | 27  |
| Sample_SPA47.mb.42              | 98.32  | 0.671 | 108 |
| Sample_SPA47.Cluster89cbin.1    | 93.62  | 2.227 | 168 |
| Sample_SPA47.mb.36cbin.1        | 89.19  | 1.342 | 77  |
| Sample_SPA47.Cluster6035        | 95.47  | 0.000 | 33  |
| Sample_SPA47.mb.29              | 91.27  | 1.342 | 275 |
| Sample_SPA47.mb.49cbin.1        | 82.20  | 2.531 | 254 |
| Sample_SPA47.mb.39cbin.1        | 91.69  | 1.442 | 30  |
| Sample_SPA47.Cluster6029        | 98.92  | 0.000 | 51  |
| Sample_SPA47.mb.34              | 83.41  | 0.284 | 330 |
| Sample_SPA47.mb.11              | 91.25  | 1.492 | 140 |
| Sample_SPA47.mb.84cbin.1        | 96.15  | 4.801 | 278 |
| Sample_SPA47.mb.68              | 92.93  | 1.265 | 238 |
| Sample_SPA47.Cluster4528        | 99.61  | 0.576 | 79  |
| Sample_SPA47.mb.87cbin.1        | 92.28  | 0.671 | 140 |
| Sample_SPA47.mb.54cbin.1        | 100.00 | 2.163 | 36  |
| Sample_SPA47.Cluster7793cbin.1  | 97.60  | 0.769 | 227 |
| Sample_SPA47.mb.27cbin.1        | 95.90  | 1.461 | 64  |
| Sample_SPA47.mb.74              | 88.90  | 3.846 | 49  |

|                                |       |       |     |
|--------------------------------|-------|-------|-----|
| Sample_SPA47.mb.64             | 98.65 | 0.447 | 21  |
| Sample_SPA47.mb.86             | 89.26 | 0.000 | 33  |
| Sample_SPA47.mb.43             | 97.39 | 2.287 | 295 |
| Sample_SPA47.mb.6              | 99.46 | 0.000 | 53  |
| Sample_SPB03.Cluster3771       | 91.39 | 0.097 | 48  |
| Sample_SPB03.Cluster911cbin.1  | 99.30 | 2.913 | 84  |
| Sample_SPB03.mb.105            | 96.64 | 0.000 | 36  |
| Sample_SPB03.mb.3              | 98.65 | 0.000 | 17  |
| Sample_SPB03.Cluster3812cbin.1 | 93.62 | 0.000 | 36  |
| Sample_SPB03.mb.42             | 97.31 | 1.342 | 53  |
| Sample_SPB03.mb.65cbin.1       | 92.93 | 1.342 | 29  |
| Sample_SPB03.mb.4              | 97.76 | 0.671 | 99  |
| Sample_SPB03.mb.50cbin.1       | 86.44 | 3.914 | 305 |
| Sample_SPB03.mb.74cbin.1       | 81.03 | 0.862 | 155 |
| Sample_SPB03.Cluster36cbin.1   | 89.65 | 2.822 | 368 |
| Sample_SPB03.mb.56             | 93.73 | 0.671 | 73  |
| Sample_SPB03.Cluster323        | 94.52 | 0.481 | 133 |
| Sample_SPB03.mb.48             | 85.21 | 0.503 | 182 |
| Sample_SPB03.Cluster9294       | 99.32 | 1.342 | 21  |
| Sample_SPB03.mb.47             | 91.94 | 0.000 | 68  |
| Sample_SPB03.mb.64cbin.1       | 83.14 | 2.005 | 346 |
| Sample_SPB03.mb.5              | 97.31 | 0.671 | 11  |
| Sample_SPB03.mb.22             | 98.38 | 2.726 | 57  |
| Sample_SPB03.mb.81             | 90.01 | 1.342 | 306 |
| Sample_SPB03.mb.28             | 89.03 | 2.852 | 234 |
| Sample_SPB03.mb.7              | 98.99 | 0.000 | 40  |
| Sample_SPB03.mb.2cbin.1        | 93.92 | 0.185 | 51  |
| Sample_SPB03.mb.89             | 95.14 | 2.465 | 69  |
| Sample_SPB03.mb.92             | 89.18 | 1.923 | 40  |
| Sample_SPB03.mb.55             | 99.24 | 0.000 | 11  |
| Sample_SPB03.mb.67             | 98.95 | 1.690 | 78  |
| Sample_SPB03.mb.79cbin.1       | 93.68 | 0.689 | 369 |
| Sample_SPB03.mb.60cbin.1       | 94.90 | 0.705 | 273 |
| Sample_SPB03.mb.78             | 89.60 | 3.794 | 302 |
| Sample_SPB03.mb.100cbin.1      | 98.89 | 0.303 | 135 |
| Sample_SPB03.mb.35cbin.1       | 97.90 | 0.136 | 57  |
| Sample_SPB04.mb.16             | 90.16 | 4.494 | 179 |
| Sample_SPB04.mb.37             | 93.41 | 2.664 | 32  |
| Sample_SPB04.Cluster2864cbin.1 | 95.97 | 0.000 | 32  |
| Sample_SPB04.mb.53cbin.1       | 91.70 | 1.196 | 254 |
| Sample_SPB04.mb.15             | 83.53 | 3.225 | 419 |
| Sample_SPB04.Cluster3664cbin.1 | 98.14 | 0.000 | 60  |
| Sample_SPB04.Cluster4111       | 99.40 | 0.898 | 76  |
| Sample_SPB04.mb.61cbin.1       | 97.04 | 0.632 | 120 |
| Sample_SPB04.mb.24             | 82.59 | 4.570 | 143 |
| Sample_SPB04.Cluster4530cbin.1 | 89.77 | 0.119 | 126 |
| Sample_SPB04.Cluster383cbin.1  | 95.91 | 0.000 | 26  |
| Sample_SPB04.Cluster1539cbin.1 | 88.58 | 0.433 | 213 |
| Sample_SPB04.mb.69cbin.1       | 95.86 | 3.401 | 291 |
| Sample_SPB04.Cluster9349cbin.1 | 98.65 | 0.335 | 47  |
| Sample_SPB04.mb.44             | 94.63 | 0.671 | 31  |
| Sample_SPB04.mb.56cbin.1       | 96.93 | 0.000 | 14  |
| Sample_SPB04.mb.7cbin.1        | 95.71 | 4.182 | 135 |
| Sample_SPB04.Cluster2090cbin.1 | 98.22 | 0.000 | 166 |
| Sample_SPB04.mb.60cbin.1       | 98.00 | 4.911 | 121 |
| Sample_SPB04.mb.67cbin.1       | 87.92 | 4.335 | 380 |
| Sample_SPB04.Cluster4564cbin.1 | 99.23 | 1.293 | 134 |
| Sample_SPB04.mb.32cbin.1       | 96.22 | 1.153 | 283 |



|                                 |        |       |     |
|---------------------------------|--------|-------|-----|
| Sample_SPB04.Cluster3304cbin.1  | 99.19  | 0.358 | 47  |
| Sample_SPB06.Cluster12077       | 80.16  | 2.447 | 24  |
| Sample_SPB06.mb.101cbin.1       | 91.57  | 2.247 | 32  |
| Sample_SPB06.mb.109             | 89.33  | 1.333 | 35  |
| Sample_SPB06.Cluster305cbin.1   | 81.72  | 4.362 | 257 |
| Sample_SPB06.Cluster460cbin.1   | 93.28  | 2.348 | 69  |
| Sample_SPB06.Cluster5391cbin.1  | 94.51  | 2.589 | 44  |
| Sample_SPB06.Cluster11221       | 84.56  | 0.000 | 38  |
| Sample_SPB06.mb.121             | 89.93  | 0.000 | 78  |
| Sample_SPB06.Cluster5816        | 97.98  | 0.335 | 17  |
| Sample_SPB06.Cluster10276       | 83.54  | 0.305 | 286 |
| Sample_SPB06.Cluster11862       | 82.27  | 0.632 | 30  |
| Sample_SPB06.Cluster230         | 100.00 | 1.777 | 27  |
| Sample_SPB06.mb.22cbin.1        | 99.30  | 0.932 | 81  |
| Sample_SPB06.Cluster6548        | 99.32  | 1.006 | 16  |
| Sample_SPB06.Cluster483         | 97.95  | 0.000 | 24  |
| Sample_SPB06.mb.124cbin.1       | 93.95  | 0.671 | 154 |
| Sample_SPB06.Cluster79cbin.1    | 100.00 | 0.268 | 49  |
| Sample_SPB06.Cluster6857        | 90.09  | 3.547 | 33  |
| Sample_SPB06.Cluster11209       | 98.65  | 0.671 | 23  |
| Sample_SPB06.mb.100             | 98.65  | 0.000 | 31  |
| Sample_SPB06.mb.30cbin.1        | 81.67  | 0.793 | 273 |
| Sample_SPB06.mb.27              | 95.13  | 1.006 | 155 |
| Sample_SPB06.mb.139             | 94.40  | 0.681 | 142 |
| Sample_SPB06.Cluster8017        | 95.74  | 3.635 | 74  |
| Sample_SPB06.mb.115cbin.1       | 97.83  | 0.000 | 96  |
| Sample_SPB06.mb.132cbin.1       | 96.94  | 0.185 | 75  |
| Sample_SPB06.mb.126             | 97.31  | 0.671 | 49  |
| Sample_SPB06.mb.66              | 93.93  | 1.342 | 20  |
| Sample_SPB06.mb.55              | 96.94  | 0.793 | 37  |
| Sample_SPB06.mb.20              | 85.19  | 2.210 | 104 |
| Sample_SPB06.mb.33cbin.1        | 86.24  | 1.136 | 85  |
| Sample_SPB06.mb.48              | 93.28  | 2.013 | 78  |
| Sample_SPB06.mb.46cbin.1        | 97.27  | 0.000 | 24  |
| Sample_SPB06.Cluster5860cbin.1  | 99.19  | 0.576 | 42  |
| Sample_SPB06.Cluster6553cbin.1  | 91.67  | 1.503 | 64  |
| Sample_SPB06.mb.74cbin.1        | 85.67  | 1.197 | 145 |
| Sample_SPB06.mb.81              | 80.94  | 1.342 | 207 |
| Sample_SPB06.Cluster7281cbin.1  | 97.88  | 0.576 | 38  |
| Sample_SPB06.mb.97              | 96.42  | 1.372 | 84  |
| Sample_SPB06.mb.83cbin.1        | 98.38  | 0.806 | 24  |
| Sample_SPB06.mb.44              | 98.65  | 0.000 | 77  |
| Sample_SPB06.mb.54cbin.1        | 87.45  | 4.628 | 363 |
| Sample_SPB06.mb.93              | 93.90  | 0.000 | 62  |
| Sample_SPB06.mb.65              | 81.45  | 2.215 | 282 |
| Sample_SPB06.Cluster6571cbin.1  | 99.46  | 0.537 | 103 |
| Sample_SPB06.mb.96cbin.1        | 87.87  | 0.909 | 298 |
| Sample_SPB06.mb.89cbin.1        | 97.46  | 0.105 | 110 |
| Sample_SPB06.mb.88cbin.1        | 94.03  | 3.283 | 146 |
| Sample_SPB06.mb.25              | 86.51  | 2.106 | 81  |
| Sample_SPB07.Cluster10588cbin.1 | 92.69  | 2.407 | 27  |
| Sample_SPB07.Cluster10626       | 91.57  | 1.123 | 13  |
| Sample_SPB07.Cluster3324cbin.1  | 92.47  | 0.000 | 191 |
| Sample_SPB07.mb.19              | 92.41  | 4.494 | 22  |
| Sample_SPB07.Cluster127cbin.1   | 87.91  | 0.000 | 52  |
| Sample_SPB07.Cluster2229cbin.1  | 93.06  | 0.000 | 130 |
| Sample_SPB07.mb.109             | 86.57  | 2.013 | 211 |
| Sample_SPB07.mb.105cbin.1       | 90.71  | 4.697 | 254 |

|                                |        |       |     |
|--------------------------------|--------|-------|-----|
| Sample_SPB07.mb.44             | 87.44  | 2.013 | 83  |
| Sample_SPB07.mb.47             | 92.55  | 1.677 | 178 |
| Sample_SPB07.Cluster1982       | 100.00 | 0.000 | 33  |
| Sample_SPB07.Cluster1478       | 98.75  | 0.625 | 29  |
| Sample_SPB07.Cluster5497cbin.1 | 93.56  | 0.350 | 72  |
| Sample_SPB07.Cluster153cbin.1  | 92.85  | 0.000 | 230 |
| Sample_SPB07.mb.87cbin.1       | 82.45  | 0.000 | 114 |
| Sample_SPB07.mb.104            | 93.92  | 0.986 | 200 |
| Sample_SPB07.Cluster1836       | 100.00 | 0.227 | 11  |
| Sample_SPB07.Cluster283        | 99.55  | 0.000 | 34  |
| Sample_SPB07.Cluster8450       | 96.64  | 1.677 | 40  |
| Sample_SPB07.mb.31cbin.1       | 87.81  | 0.000 | 81  |
| Sample_SPB07.mb.42             | 80.19  | 1.449 | 72  |
| Sample_SPB07.Cluster3014cbin.1 | 96.95  | 0.754 | 79  |
| Sample_SPB07.mb.2              | 83.22  | 0.000 | 19  |
| Sample_SPB07.mb.50             | 88.63  | 1.814 | 235 |
| Sample_SPB07.Cluster7656       | 91.18  | 0.483 | 72  |
| Sample_SPB07.mb.38cbin.1       | 99.19  | 0.000 | 112 |
| Sample_SPB07.mb.30             | 85.89  | 0.000 | 27  |
| Sample_SPB07.mb.66             | 98.03  | 0.223 | 177 |
| Sample_SPB07.mb.4cbin.1        | 99.51  | 0.961 | 35  |
| Sample_SPB07.mb.86             | 91.60  | 1.697 | 79  |
| Sample_SPB07.mb.14cbin.1       | 94.63  | 0.701 | 52  |
| Sample_SPB07.mb.48             | 87.21  | 4.202 | 297 |
| Sample_SPB07.mb.94cbin.1       | 82.82  | 0.443 | 291 |
| Sample_SPB07.mb.49             | 93.61  | 3.599 | 147 |
| Sample_SPB07.Cluster6051cbin.1 | 99.46  | 0.000 | 75  |
| Sample_SPB07.Cluster4507cbin.1 | 99.25  | 0.000 | 36  |
| Sample_SPB07.Cluster4015cbin.1 | 84.92  | 4.973 | 725 |
| Sample_SPB07.Cluster5231       | 99.23  | 0.961 | 52  |
| Sample_SPB07.mb.72             | 91.28  | 0.724 | 46  |
| Sample_SPB07.mb.75             | 83.11  | 2.726 | 191 |
| Sample_SPB07.mb.7cbin.1        | 92.61  | 3.855 | 82  |
| Sample_SPB07.mb.89             | 89.89  | 2.611 | 82  |
| Sample_SPB08.Cluster2354cbin.1 | 81.37  | 1.724 | 404 |
| Sample_SPB08.Cluster4881       | 92.26  | 1.342 | 23  |
| Sample_SPB08.Cluster340cbin.1  | 87.13  | 1.342 | 49  |
| Sample_SPB08.Cluster151        | 89.26  | 0.335 | 26  |
| Sample_SPB08.mb.31             | 93.33  | 4.666 | 57  |
| Sample_SPB08.Cluster3815cbin.1 | 95.97  | 0.000 | 181 |
| Sample_SPB08.Cluster8127       | 99.19  | 0.806 | 8   |
| Sample_SPB08.Cluster4330cbin.1 | 98.08  | 1.497 | 90  |
| Sample_SPB08.Cluster5760       | 88.29  | 0.000 | 16  |
| Sample_SPB08.mb.46             | 94.85  | 0.000 | 98  |
| Sample_SPB08.mb.5              | 98.38  | 3.225 | 125 |
| Sample_SPB08.mb.13cbin.1       | 82.99  | 0.000 | 44  |
| Sample_SPB08.Cluster2943cbin.1 | 97.31  | 0.000 | 13  |
| Sample_SPB08.mb.25cbin.1       | 81.20  | 0.776 | 63  |
| Sample_SPB08.Cluster6125       | 100.00 | 0.480 | 11  |
| Sample_SPB08.mb.53             | 98.60  | 1.165 | 102 |
| Sample_SPB08.mb.38             | 92.03  | 1.062 | 259 |
| Sample_SPB08.mb.63             | 89.26  | 0.000 | 30  |
| Sample_SPB08.mb.55             | 84.00  | 0.671 | 39  |
| Sample_SPB08.Cluster7895       | 87.69  | 0.000 | 19  |
| Sample_SPB08.Cluster6032cbin.1 | 95.30  | 1.510 | 232 |
| Sample_SPB08.mb.116            | 93.28  | 1.067 | 106 |
| Sample_SPB08.mb.114            | 99.03  | 1.730 | 63  |
| Sample_SPB08.Cluster8080       | 99.32  | 2.348 | 22  |

|                                |        |       |     |
|--------------------------------|--------|-------|-----|
| Sample_SPB08.mb.50             | 91.19  | 2.380 | 237 |
| Sample_SPB08.mb.7              | 85.90  | 1.342 | 77  |
| Sample_SPB08.mb.58cbin.1       | 80.50  | 1.696 | 103 |
| Sample_SPB08.mb.70cbin.1       | 89.20  | 2.584 | 360 |
| Sample_SPB08.mb.101cbin.1      | 96.56  | 0.671 | 50  |
| Sample_SPB08.mb.65             | 99.10  | 3.355 | 76  |
| Sample_SPB08.mb.59cbin.1       | 87.03  | 4.988 | 127 |
| Sample_SPB08.mb.86             | 85.23  | 0.671 | 35  |
| Sample_SPB08.mb.26cbin.1       | 98.38  | 0.806 | 194 |
| Sample_SPB08.Cluster8661cbin.1 | 91.21  | 1.125 | 262 |
| Sample_SPB08.Cluster4205cbin.1 | 95.96  | 1.503 | 330 |
| Sample_SPB08.mb.62             | 88.81  | 4.807 | 34  |
| Sample_SPB08.mb.69             | 97.10  | 0.483 | 45  |
| Sample_SPB08.mb.74cbin.1       | 95.63  | 0.447 | 75  |
| Sample_SPB08.mb.79             | 96.79  | 2.163 | 132 |
| Sample_SPB08.mb.87cbin.1       | 95.29  | 0.092 | 57  |
| Sample_SPB09.Cluster19cbin.1   | 85.23  | 0.866 | 210 |
| Sample_SPB09.mb.30             | 98.60  | 1.165 | 89  |
| Sample_SPB09.mb.19             | 95.41  | 0.671 | 82  |
| Sample_SPB09.Cluster7564cbin.1 | 98.10  | 1.582 | 95  |
| Sample_SPB09.mb.5cbin.1        | 84.56  | 0.503 | 336 |
| Sample_SPB09.mb.20cbin.1       | 92.61  | 0.000 | 23  |
| Sample_SPB09.Cluster332cbin.1  | 96.25  | 3.582 | 237 |
| Sample_SPB09.mb.50cbin.1       | 95.47  | 2.348 | 174 |
| Sample_SPB09.mb.2              | 97.98  | 0.000 | 11  |
| Sample_SPB09.Cluster116        | 99.55  | 0.000 | 45  |
| Sample_SPB09.Cluster5574       | 89.04  | 0.000 | 29  |
| Sample_SPB09.Cluster1064       | 96.22  | 0.000 | 44  |
| Sample_SPB09.mb.85cbin.1       | 90.92  | 3.850 | 257 |
| Sample_SPB09.mb.27             | 99.32  | 0.000 | 31  |
| Sample_SPB09.Cluster245cbin.1  | 84.08  | 1.586 | 38  |
| Sample_SPB09.Cluster8333cbin.1 | 98.65  | 0.000 | 87  |
| Sample_SPB09.mb.88cbin.1       | 92.61  | 2.327 | 108 |
| Sample_SPB09.mb.67             | 97.10  | 2.584 | 61  |
| Sample_SPB09.mb.61             | 95.30  | 3.846 | 29  |
| Sample_SPB09.mb.32             | 99.03  | 0.483 | 49  |
| Sample_SPB09.mb.64             | 93.59  | 0.352 | 262 |
| Sample_SPB09.mb.54cbin.1       | 100.00 | 0.105 | 63  |
| Sample_SPB09.mb.56             | 99.24  | 0.000 | 19  |
| Sample_SPB09.Cluster3968       | 98.92  | 0.017 | 228 |
| Sample_SPB09.mb.24cbin.1       | 85.68  | 2.205 | 45  |
| Sample_SPB09.mb.82cbin.1       | 90.19  | 1.691 | 246 |
| Sample_SPB09.mb.46cbin.1       | 95.64  | 2.403 | 263 |
| Sample_SPB09.mb.8cbin.1        | 97.73  | 0.632 | 124 |
| Sample_SPB10.Cluster7361cbin.1 | 83.66  | 0.671 | 25  |
| Sample_SPB10.Cluster4204cbin.1 | 95.37  | 0.782 | 173 |
| Sample_SPB10.Cluster2637cbin.1 | 97.67  | 1.898 | 33  |
| Sample_SPB10.mb.63             | 90.60  | 0.335 | 10  |
| Sample_SPB10.Cluster1613cbin.1 | 91.13  | 0.021 | 62  |
| Sample_SPB10.mb.73             | 88.93  | 1.403 | 208 |
| Sample_SPB10.Cluster7560       | 95.28  | 0.000 | 56  |
| Sample_SPB10.Cluster5073cbin.1 | 84.55  | 2.715 | 296 |
| Sample_SPB10.mb.60cbin.1       | 85.02  | 0.632 | 82  |
| Sample_SPB10.mb.9              | 92.61  | 0.671 | 26  |
| Sample_SPB10.Cluster192        | 98.40  | 0.000 | 62  |
| Sample_SPB10.Cluster6869cbin.1 | 97.98  | 0.000 | 30  |
| Sample_SPB10.Cluster6006       | 98.63  | 0.000 | 37  |
| Sample_SPB10.mb.71cbin.1       | 97.98  | 1.971 | 88  |

|                                |        |       |     |
|--------------------------------|--------|-------|-----|
| Sample_SPB10.mb.58             | 95.63  | 0.335 | 40  |
| Sample_SPB10.mb.10cbin.1       | 97.36  | 1.360 | 102 |
| Sample_SPB10.Cluster4063       | 99.51  | 0.241 | 70  |
| Sample_SPB10.mb.70cbin.1       | 92.97  | 1.020 | 287 |
| Sample_SPB10.Cluster12cbin.1   | 89.71  | 0.787 | 480 |
| Sample_SPB10.mb.36cbin.1       | 98.32  | 0.469 | 84  |
| Sample_SPB10.mb.6cbin.1        | 98.60  | 1.140 | 101 |
| Sample_SPB10.mb.29             | 94.15  | 4.210 | 107 |
| Sample_SPB10.mb.77             | 99.21  | 1.207 | 61  |
| Sample_SPB10.mb.54cbin.1       | 96.51  | 0.105 | 287 |
| Sample_SPB10.Cluster2695cbin.1 | 92.53  | 0.123 | 51  |
| Sample_SPB10.mb.53             | 97.41  | 0.185 | 43  |
| Sample_SPB10.Cluster4934cbin.1 | 92.83  | 0.791 | 142 |
| Sample_SPB10.mb.28             | 97.74  | 0.208 | 44  |
| Sample_SPB10.mb.67cbin.1       | 90.69  | 3.642 | 699 |
| Sample_SPB11.Cluster5576       | 98.63  | 1.342 | 28  |
| Sample_SPB11.Cluster2626       | 97.04  | 0.949 | 33  |
| Sample_SPB11.mb.24             | 91.24  | 1.403 | 295 |
| Sample_SPB11.Cluster14         | 97.19  | 1.027 | 210 |
| Sample_SPB11.Cluster1613cbin.1 | 97.31  | 0.000 | 152 |
| Sample_SPB11.mb.54             | 98.60  | 1.165 | 191 |
| Sample_SPB11.Cluster96cbin.1   | 95.41  | 4.647 | 283 |
| Sample_SPB11.mb.58             | 89.77  | 1.282 | 298 |
| Sample_SPB11.Cluster2830       | 92.21  | 0.898 | 39  |
| Sample_SPB11.Cluster7987cbin.1 | 97.30  | 0.134 | 194 |
| Sample_SPB11.Cluster12cbin.1   | 84.59  | 2.856 | 289 |
| Sample_SPB11.Cluster6266       | 99.32  | 1.006 | 16  |
| Sample_SPB11.Cluster1895       | 97.27  | 0.000 | 16  |
| Sample_SPB11.mb.1              | 96.37  | 1.449 | 59  |
| Sample_SPB11.Cluster4339       | 92.61  | 0.335 | 19  |
| Sample_SPB11.mb.4              | 94.19  | 0.316 | 218 |
| Sample_SPB11.mb.3              | 89.18  | 0.961 | 23  |
| Sample_SPB11.Cluster4404       | 83.22  | 0.000 | 19  |
| Sample_SPB11.Cluster746        | 98.75  | 0.625 | 25  |
| Sample_SPB11.mb.63cbin.1       | 91.27  | 0.939 | 66  |
| Sample_SPB11.mb.80cbin.1       | 97.31  | 0.921 | 132 |
| Sample_SPB11.mb.39             | 82.43  | 2.559 | 254 |
| Sample_SPB11.mb.66             | 100.00 | 0.806 | 30  |
| Sample_SPB11.mb.10             | 86.95  | 0.483 | 45  |
| Sample_SPB11.Cluster7487cbin.1 | 98.63  | 1.405 | 86  |
| Sample_SPB11.mb.53cbin.1       | 89.47  | 0.584 | 69  |
| Sample_SPB11.mb.13cbin.1       | 97.35  | 0.000 | 74  |
| Sample_SPB11.mb.47             | 87.04  | 1.007 | 121 |
| Sample_SPB11.Cluster2040cbin.1 | 96.67  | 2.135 | 86  |
| Sample_SPB11.mb.73cbin.1       | 98.63  | 0.000 | 29  |
| Sample_SPB11.Cluster3214cbin.1 | 98.14  | 0.929 | 47  |
| Sample_SPB11.mb.74             | 84.28  | 1.809 | 157 |
| Sample_SPB11.mb.8cbin.1        | 94.84  | 4.622 | 308 |
| Sample_SPB11.Cluster1227cbin.1 | 95.48  | 3.609 | 356 |
| Sample_SPB12.Cluster19582      | 91.57  | 1.123 | 14  |
| Sample_SPB12.Cluster18884      | 89.74  | 0.854 | 7   |
| Sample_SPB12.Cluster6377cbin.1 | 95.96  | 1.169 | 57  |
| Sample_SPB12.Cluster3162cbin.1 | 93.00  | 0.000 | 96  |
| Sample_SPB12.mb.124            | 87.91  | 0.335 | 231 |
| Sample_SPB12.mb.127            | 91.30  | 0.466 | 356 |
| Sample_SPB12.Cluster4807cbin.1 | 88.10  | 1.851 | 166 |
| Sample_SPB12.mb.131            | 97.20  | 3.131 | 241 |
| Sample_SPB12.mb.15             | 97.98  | 0.000 | 13  |

|                                 |        |       |     |
|---------------------------------|--------|-------|-----|
| Sample_SPB12.Cluster13513cbin.1 | 97.31  | 0.894 | 65  |
| Sample_SPB12.mb.138             | 98.32  | 0.671 | 59  |
| Sample_SPB12.Cluster1418        | 97.95  | 0.000 | 22  |
| Sample_SPB12.Cluster18261       | 99.47  | 0.000 | 36  |
| Sample_SPB12.Cluster11654cbin.1 | 90.57  | 1.183 | 173 |
| Sample_SPB12.mb.34              | 90.55  | 0.000 | 22  |
| Sample_SPB12.Cluster197         | 99.37  | 0.621 | 62  |
| Sample_SPB12.mb.101cbin.1       | 97.27  | 0.000 | 20  |
| Sample_SPB12.mb.4               | 97.98  | 1.342 | 47  |
| Sample_SPB12.Cluster9121cbin.1  | 94.47  | 2.657 | 200 |
| Sample_SPB12.mb.132cbin.1       | 89.09  | 0.984 | 99  |
| Sample_SPB12.mb.33              | 82.14  | 2.521 | 241 |
| Sample_SPB12.mb.94              | 93.33  | 3.030 | 36  |
| Sample_SPB12.mb.121             | 98.22  | 0.000 | 39  |
| Sample_SPB12.mb.10cbin.1        | 85.99  | 2.824 | 332 |
| Sample_SPB12.mb.128cbin.1       | 88.86  | 0.754 | 32  |
| Sample_SPB12.mb.43cbin.1        | 95.46  | 2.339 | 53  |
| Sample_SPB12.mb.29cbin.1        | 94.01  | 1.497 | 110 |
| Sample_SPB12.mb.35              | 83.09  | 1.077 | 362 |
| Sample_SPB12.mb.23              | 97.31  | 0.000 | 25  |
| Sample_SPB12.mb.21              | 97.98  | 0.000 | 22  |
| Sample_SPB12.mb.51cbin.1        | 84.56  | 0.335 | 19  |
| Sample_SPB12.mb.37              | 98.65  | 1.342 | 46  |
| Sample_SPB12.mb.47              | 95.98  | 0.966 | 52  |
| Sample_SPB12.mb.52              | 97.98  | 0.000 | 28  |
| Sample_SPB12.mb.99cbin.1        | 90.60  | 0.000 | 82  |
| Sample_SPB12.Cluster6415cbin.1  | 96.60  | 1.765 | 214 |
| Sample_SPB12.mb.90cbin.1        | 99.02  | 0.791 | 105 |
| Sample_SPB12.mb.87cbin.1        | 98.63  | 0.373 | 50  |
| Sample_SPB12.Cluster1202cbin.1  | 98.17  | 1.240 | 44  |
| Sample_SPB13.Cluster2582        | 83.10  | 0.862 | 52  |
| Sample_SPB13.Cluster286         | 88.59  | 0.671 | 30  |
| Sample_SPB13.Cluster219cbin.1   | 96.64  | 0.530 | 161 |
| Sample_SPB13.mb.28              | 95.30  | 0.000 | 139 |
| Sample_SPB13.Cluster413         | 96.02  | 1.020 | 46  |
| Sample_SPB13.mb.13              | 96.63  | 0.000 | 23  |
| Sample_SPB13.Cluster3974cbin.1  | 84.57  | 1.689 | 369 |
| Sample_SPB13.mb.43cbin.1        | 91.94  | 0.000 | 46  |
| Sample_SPB13.Cluster4375cbin.1  | 96.61  | 1.932 | 82  |
| Sample_SPB13.Cluster6039        | 99.32  | 3.020 | 19  |
| Sample_SPB13.Cluster3169        | 96.38  | 1.497 | 21  |
| Sample_SPB13.mb.32              | 97.54  | 0.961 | 38  |
| Sample_SPB13.Cluster17cbin.1    | 91.74  | 1.156 | 210 |
| Sample_SPB13.Cluster418         | 99.54  | 0.984 | 25  |
| Sample_SPB13.Cluster946         | 98.75  | 0.625 | 33  |
| Sample_SPB13.mb.1               | 94.44  | 4.803 | 53  |
| Sample_SPB13.Cluster8cbin.1     | 95.97  | 2.013 | 239 |
| Sample_SPB13.mb.81              | 89.84  | 0.671 | 196 |
| Sample_SPB13.mb.83              | 88.39  | 0.000 | 277 |
| Sample_SPB13.Cluster3792cbin.1  | 93.02  | 2.363 | 90  |
| Sample_SPB13.mb.69cbin.1        | 96.64  | 2.390 | 44  |
| Sample_SPB13.mb.38cbin.1        | 89.87  | 4.372 | 149 |
| Sample_SPB13.mb.66cbin.1        | 92.69  | 0.789 | 341 |
| Sample_SPB13.mb.4cbin.1         | 100.00 | 0.632 | 75  |
| Sample_SPB13.Cluster2682cbin.1  | 97.16  | 3.841 | 49  |
| Sample_SPB13.Cluster2803cbin.1  | 93.77  | 0.000 | 90  |
| Sample_SPB13.mb.59              | 99.62  | 0.000 | 16  |
| Sample_SPB13.mb.67cbin.1        | 97.07  | 0.000 | 71  |

|                                |       |       |     |
|--------------------------------|-------|-------|-----|
| Sample_SPB13.Cluster6576cbin.1 | 94.68 | 4.926 | 229 |
| Sample_SPB13.mb.74             | 95.86 | 1.442 | 31  |
| Sample_SPB13.mb.31cbin.1       | 96.39 | 4.397 | 86  |
| Sample_SPB13.mb.63             | 98.88 | 0.000 | 36  |
| Sample_SPB15.Cluster11681      | 92.69 | 2.969 | 25  |
| Sample_SPB15.mb.5cbin.1        | 92.41 | 2.247 | 41  |
| Sample_SPB15.Cluster5cbin.1    | 92.40 | 4.020 | 163 |
| Sample_SPB15.mb.18             | 83.64 | 1.744 | 249 |
| Sample_SPB15.mb.44cbin.1       | 96.77 | 3.293 | 118 |
| Sample_SPB15.Cluster10967      | 99.32 | 0.671 | 14  |
| Sample_SPB15.Cluster34         | 80.19 | 0.671 | 162 |
| Sample_SPB15.mb.67             | 84.64 | 0.671 | 222 |
| Sample_SPB15.Cluster362cbin.1  | 84.56 | 4.026 | 34  |
| Sample_SPB15.mb.65             | 89.82 | 0.061 | 191 |
| Sample_SPB15.mb.22cbin.1       | 84.76 | 1.342 | 169 |
| Sample_SPB15.mb.48             | 87.58 | 1.906 | 139 |
| Sample_SPB15.mb.25             | 89.84 | 1.006 | 231 |
| Sample_SPB15.mb.35             | 91.66 | 0.873 | 131 |
| Sample_SPB15.Cluster4864cbin.1 | 95.30 | 2.013 | 24  |
| Sample_SPB15.mb.33cbin.1       | 83.08 | 4.697 | 314 |
| Sample_SPB15.mb.50cbin.1       | 81.43 | 2.684 | 30  |
| Sample_SPB15.mb.64             | 87.24 | 1.342 | 50  |
| Sample_SPB15.Cluster1660cbin.1 | 92.77 | 0.335 | 105 |
| Sample_SPB15.mb.3              | 93.89 | 2.813 | 230 |
| Sample_SPB15.mb.53             | 97.31 | 1.006 | 95  |
| Sample_SPB15.mb.60cbin.1       | 88.25 | 4.317 | 42  |
| Sample_SPB15.mb.58cbin.1       | 97.77 | 1.497 | 170 |
| Sample_SPB15.mb.73cbin.1       | 95.30 | 1.342 | 85  |
| Sample_SPB15.mb.84cbin.1       | 97.27 | 4.921 | 17  |
| Sample_SPB15.mb.37             | 99.66 | 0.361 | 57  |
| Sample_SPB16.mb.47             | 96.49 | 3.508 | 37  |
| Sample_SPB16.mb.43             | 82.75 | 0.000 | 173 |
| Sample_SPB16.mb.23cbin.1       | 81.64 | 4.029 | 382 |
| Sample_SPB16.Cluster7479cbin.1 | 82.23 | 2.351 | 363 |
| Sample_SPB16.mb.66             | 93.73 | 1.296 | 171 |
| Sample_SPB16.mb.58             | 98.49 | 0.241 | 20  |
| Sample_SPB16.Cluster975cbin.1  | 98.12 | 0.000 | 113 |
| Sample_SPB16.mb.40cbin.1       | 81.26 | 1.342 | 275 |
| Sample_SPB16.Cluster7012       | 98.65 | 1.677 | 15  |
| Sample_SPB16.mb.30cbin.1       | 80.65 | 3.020 | 268 |
| Sample_SPB16.mb.53             | 95.05 | 0.671 | 30  |
| Sample_SPB16.Cluster273        | 99.55 | 0.000 | 26  |
| Sample_SPB16.mb.74cbin.1       | 91.55 | 4.857 | 300 |
| Sample_SPB16.Cluster8301       | 99.47 | 0.000 | 24  |
| Sample_SPB16.mb.37cbin.1       | 86.79 | 2.899 | 305 |
| Sample_SPB16.mb.19cbin.1       | 93.95 | 1.677 | 32  |
| Sample_SPB16.Cluster7212cbin.1 | 97.38 | 2.531 | 152 |
| Sample_SPB16.Cluster5972cbin.1 | 99.51 | 0.785 | 89  |
| Sample_SPB16.mb.4cbin.1        | 92.16 | 2.670 | 264 |
| Sample_SPB16.mb.5              | 99.03 | 1.787 | 99  |
| Sample_SPB16.Cluster3018cbin.1 | 97.93 | 1.865 | 95  |
| Sample_SPB16.Cluster6185cbin.1 | 86.39 | 1.752 | 487 |
| Sample_SPB17.mb.23             | 89.23 | 0.322 | 91  |
| Sample_SPB17.Cluster126cbin.1  | 99.54 | 0.772 | 40  |
| Sample_SPB17.mb.15cbin.1       | 93.08 | 1.781 | 111 |
| Sample_SPB17.Cluster17cbin.1   | 98.63 | 0.510 | 123 |
| Sample_SPB17.mb.18             | 94.75 | 0.593 | 149 |
| Sample_SPB17.mb.5cbin.1        | 98.42 | 0.000 | 50  |

|                                 |        |       |     |
|---------------------------------|--------|-------|-----|
| Sample_SPB17.mb.39cbin.1        | 97.69  | 0.192 | 57  |
| Sample_SPB17.Cluster866         | 97.40  | 0.384 | 36  |
| Sample_SPB17.mb.46cbin.1        | 98.87  | 1.127 | 98  |
| Sample_SPB20.mb.3               | 98.50  | 0.000 | 25  |
| Sample_SPB20.mb.5               | 89.32  | 1.123 | 36  |
| Sample_SPB20.mb.48              | 91.10  | 2.013 | 154 |
| Sample_SPB20.mb.8               | 87.07  | 1.123 | 21  |
| Sample_SPB20.Cluster4644cbin.1  | 94.90  | 1.140 | 168 |
| Sample_SPB20.Cluster2764cbin.1  | 95.59  | 0.000 | 82  |
| Sample_SPB20.mb.54cbin.1        | 92.82  | 0.843 | 183 |
| Sample_SPB20.Cluster56cbin.1    | 90.21  | 1.125 | 214 |
| Sample_SPB20.mb.90              | 84.11  | 2.852 | 390 |
| Sample_SPB20.mb.22              | 99.03  | 1.469 | 36  |
| Sample_SPB20.Cluster1848cbin.1  | 97.95  | 0.000 | 42  |
| Sample_SPB20.Cluster9206        | 99.32  | 1.006 | 17  |
| Sample_SPB20.mb.24cbin.1        | 89.43  | 3.301 | 240 |
| Sample_SPB20.mb.93              | 84.03  | 0.000 | 59  |
| Sample_SPB20.Cluster379         | 100.00 | 0.115 | 15  |
| Sample_SPB20.mb.64              | 93.66  | 2.729 | 129 |
| Sample_SPB20.mb.2               | 95.30  | 1.342 | 67  |
| Sample_SPB20.mb.67              | 91.53  | 3.225 | 153 |
| Sample_SPB20.mb.92              | 97.76  | 0.020 | 58  |
| Sample_SPB20.mb.107             | 94.91  | 0.671 | 125 |
| Sample_SPB20.mb.46cbin.1        | 83.46  | 0.671 | 370 |
| Sample_SPB20.mb.77              | 89.19  | 1.814 | 171 |
| Sample_SPB20.mb.53              | 84.80  | 1.190 | 134 |
| Sample_SPB20.Cluster7098cbin.1  | 83.57  | 2.596 | 103 |
| Sample_SPB20.mb.94cbin.1        | 97.98  | 0.167 | 41  |
| Sample_SPB20.mb.33              | 93.15  | 1.854 | 85  |
| Sample_SPB20.mb.87              | 93.02  | 0.000 | 100 |
| Sample_SPB20.mb.62cbin.1        | 87.13  | 1.388 | 242 |
| Sample_SPB20.mb.45cbin.1        | 99.21  | 4.477 | 60  |
| Sample_SPB20.mb.44              | 95.44  | 0.388 | 25  |
| Sample_SPB20.mb.36              | 97.38  | 0.961 | 36  |
| Sample_SPB20.mb.63              | 91.52  | 0.894 | 103 |
| Sample_SPB20.mb.16              | 89.61  | 2.549 | 95  |
| Sample_SPB20.mb.72              | 83.91  | 2.046 | 89  |
| Sample_SPB20.mb.60              | 85.67  | 1.115 | 84  |
| Sample_SPB20.Cluster4561cbin.1  | 96.11  | 0.000 | 82  |
| Sample_SPB20.mb.95              | 83.16  | 0.000 | 145 |
| Sample_SPB20.Cluster566         | 98.80  | 0.682 | 34  |
| Sample_SPB21.Cluster4534        | 97.84  | 1.173 | 42  |
| Sample_SPB21.mb.107cbin.1       | 93.03  | 0.111 | 175 |
| Sample_SPB21.Cluster14434       | 88.88  | 0.284 | 33  |
| Sample_SPB21.mb.14              | 92.93  | 1.342 | 22  |
| Sample_SPB21.mb.1cbin.1         | 97.20  | 1.864 | 91  |
| Sample_SPB21.Cluster7341cbin.1  | 89.59  | 0.000 | 61  |
| Sample_SPB21.Cluster9839cbin.1  | 97.76  | 2.013 | 100 |
| Sample_SPB21.mb.22              | 99.32  | 2.013 | 80  |
| Sample_SPB21.mb.43              | 85.61  | 0.671 | 241 |
| Sample_SPB21.mb.103cbin.1       | 98.32  | 0.000 | 51  |
| Sample_SPB21.mb.95              | 94.82  | 4.780 | 58  |
| Sample_SPB21.mb.29cbin.1        | 95.04  | 3.164 | 166 |
| Sample_SPB21.mb.48              | 98.65  | 1.740 | 32  |
| Sample_SPB21.mb.38              | 89.60  | 2.190 | 205 |
| Sample_SPB21.mb.101             | 97.59  | 0.961 | 29  |
| Sample_SPB21.mb.45cbin.1        | 92.79  | 2.069 | 163 |
| Sample_SPB21.Cluster10842cbin.1 | 99.32  | 1.006 | 33  |

|                                 |        |       |     |
|---------------------------------|--------|-------|-----|
| Sample_SPB21.mb.55              | 91.27  | 2.572 | 58  |
| Sample_SPB21.Cluster10257cbin.1 | 96.49  | 0.000 | 95  |
| Sample_SPB21.Cluster563cbin.1   | 100.00 | 0.000 | 41  |
| Sample_SPB21.mb.64              | 92.78  | 2.852 | 230 |
| Sample_SPB21.mb.85              | 98.65  | 0.000 | 20  |
| Sample_SPB21.mb.42              | 93.96  | 1.696 | 174 |
| Sample_SPB21.mb.20              | 96.97  | 0.671 | 57  |
| Sample_SPB21.mb.52              | 96.59  | 0.680 | 218 |
| Sample_SPB21.Cluster9992        | 93.55  | 2.608 | 92  |
| Sample_SPB21.mb.44              | 95.30  | 0.000 | 23  |
| Sample_SPB21.Cluster8593cbin.1  | 98.49  | 0.000 | 30  |
| Sample_SPB21.mb.33              | 92.74  | 0.806 | 126 |
| Sample_SPB21.mb.96              | 90.82  | 0.671 | 23  |
| Sample_SPB21.mb.99              | 91.83  | 1.053 | 62  |
| Sample_SPB21.mb.57cbin.1        | 95.97  | 4.175 | 81  |
| Sample_SPB21.Cluster8466        | 99.32  | 0.000 | 222 |
| Sample_SPB21.mb.78cbin.1        | 100.00 | 0.480 | 53  |
| Sample_SPB21.mb.40cbin.1        | 89.28  | 2.487 | 68  |
| Sample_SPB21.mb.86              | 97.31  | 0.000 | 23  |
| Sample_SPB21.Cluster6847cbin.1  | 90.70  | 4.584 | 59  |
| Sample_SPB21.Cluster6428        | 96.94  | 0.384 | 137 |
| Sample_SPB21.mb.70              | 92.18  | 1.679 | 125 |
| Sample_SPB21.mb.83cbin.1        | 98.51  | 0.000 | 65  |
| Sample_SPB22.Cluster12841cbin.1 | 93.82  | 1.123 | 13  |
| Sample_SPB22.Cluster12951       | 98.66  | 0.111 | 10  |
| Sample_SPB22.mb.103             | 93.82  | 2.407 | 92  |
| Sample_SPB22.Cluster12921cbin.1 | 80.16  | 2.447 | 30  |
| Sample_SPB22.Cluster5512cbin.1  | 88.23  | 1.342 | 28  |
| Sample_SPB22.Cluster7098cbin.1  | 85.07  | 2.516 | 192 |
| Sample_SPB22.Cluster9389        | 98.87  | 1.123 | 34  |
| Sample_SPB22.mb.2cbin.1         | 91.37  | 4.231 | 66  |
| Sample_SPB22.mb.38              | 97.58  | 0.000 | 58  |
| Sample_SPB22.mb.11              | 92.05  | 0.000 | 76  |
| Sample_SPB22.Cluster3071        | 87.50  | 2.403 | 33  |
| Sample_SPB22.Cluster4341cbin.1  | 85.19  | 2.013 | 37  |
| Sample_SPB22.mb.53              | 88.47  | 0.671 | 43  |
| Sample_SPB22.mb.88              | 92.13  | 0.561 | 19  |
| Sample_SPB22.Cluster10662cbin.1 | 98.65  | 1.006 | 27  |
| Sample_SPB22.mb.15cbin.1        | 87.98  | 4.560 | 702 |
| Sample_SPB22.mb.30cbin.1        | 92.58  | 2.013 | 269 |
| Sample_SPB22.Cluster7923        | 89.82  | 0.000 | 24  |
| Sample_SPB22.Cluster542         | 98.66  | 0.000 | 49  |
| Sample_SPB22.mb.86              | 96.42  | 0.000 | 54  |
| Sample_SPB22.mb.28              | 97.10  | 4.927 | 61  |
| Sample_SPB22.mb.34              | 87.27  | 3.467 | 302 |
| Sample_SPB22.mb.47              | 94.29  | 0.671 | 198 |
| Sample_SPB22.mb.83              | 98.60  | 1.165 | 89  |
| Sample_SPB22.Cluster1106cbin.1  | 98.75  | 2.484 | 329 |
| Sample_SPB22.mb.74              | 88.25  | 0.000 | 37  |
| Sample_SPB22.Cluster888         | 97.95  | 0.680 | 29  |
| Sample_SPB22.mb.24              | 95.07  | 0.000 | 31  |
| Sample_SPB22.mb.100             | 93.28  | 0.671 | 42  |
| Sample_SPB22.mb.57              | 90.62  | 4.807 | 56  |
| Sample_SPB22.mb.92              | 94.54  | 0.944 | 19  |
| Sample_SPB22.Cluster11789cbin.1 | 92.01  | 3.315 | 573 |
| Sample_SPB22.mb.42              | 85.32  | 0.591 | 544 |
| Sample_SPB22.mb.80              | 99.03  | 0.480 | 20  |
| Sample_SPB22.Cluster5885        | 94.65  | 0.192 | 118 |



|                                 |        |       |     |
|---------------------------------|--------|-------|-----|
| Sample_SPB22.mb.72              | 95.90  | 0.584 | 49  |
| Sample_SPB22.mb.55              | 99.24  | 0.000 | 41  |
| Sample_SPB22.mb.36              | 85.70  | 0.929 | 81  |
| Sample_SPB22.Cluster5410cbin.1  | 96.76  | 0.384 | 219 |
| Sample_SPB22.mb.73              | 91.45  | 0.469 | 125 |
| Sample_SPB25.Cluster14413       | 92.69  | 2.407 | 59  |
| Sample_SPB25.Cluster6862        | 92.40  | 0.699 | 8   |
| Sample_SPB25.Cluster2209cbin.1  | 91.93  | 4.327 | 209 |
| Sample_SPB25.Cluster557         | 97.58  | 0.806 | 21  |
| Sample_SPB25.mb.14              | 91.78  | 0.335 | 221 |
| Sample_SPB25.Cluster13262cbin.1 | 99.05  | 0.000 | 114 |
| Sample_SPB25.mb.51              | 84.34  | 0.806 | 350 |
| Sample_SPB25.mb.12              | 98.38  | 0.000 | 13  |
| Sample_SPB25.mb.20cbin.1        | 89.59  | 1.342 | 84  |
| Sample_SPB25.Cluster6772        | 97.31  | 0.671 | 98  |
| Sample_SPB25.mb.52              | 95.52  | 1.165 | 103 |
| Sample_SPB25.mb.26              | 99.32  | 0.671 | 39  |
| Sample_SPB25.mb.18cbin.1        | 82.63  | 1.972 | 387 |
| Sample_SPB25.Cluster13419cbin.1 | 95.84  | 2.112 | 258 |
| Sample_SPB25.mb.32              | 100.00 | 1.006 | 92  |
| Sample_SPB25.mb.48cbin.1        | 97.31  | 0.671 | 61  |
| Sample_SPB25.Cluster11630cbin.1 | 99.61  | 0.000 | 29  |
| Sample_SPB25.mb.38              | 100.00 | 0.000 | 30  |
| Sample_SPB25.mb.67              | 91.99  | 2.913 | 214 |
| Sample_SPB25.mb.24cbin.1        | 82.22  | 4.219 | 319 |
| Sample_SPB25.Cluster677         | 94.50  | 0.977 | 48  |
| Sample_SPB25.Cluster228cbin.1   | 93.76  | 2.777 | 50  |
| Sample_SPB25.mb.65              | 88.14  | 0.335 | 253 |
| Sample_SPB25.mb.74              | 80.44  | 2.066 | 118 |
| Sample_SPB25.mb.91cbin.1        | 93.95  | 3.041 | 164 |
| Sample_SPB25.mb.31              | 99.11  | 0.499 | 55  |
| Sample_SPB25.mb.92              | 96.09  | 0.236 | 66  |
| Sample_SPB25.Cluster6849cbin.1  | 95.98  | 0.867 | 63  |
| Sample_SPB25.mb.83cbin.1        | 97.76  | 0.000 | 43  |
| Sample_SPB25.mb.82cbin.1        | 93.45  | 0.971 | 141 |
| Sample_SPB25.mb.81              | 95.32  | 1.478 | 95  |
| Sample_SPB25.mb.77              | 98.12  | 1.466 | 82  |
| Sample_SPB25.Cluster7636cbin.1  | 98.72  | 1.761 | 114 |
| Sample_SPB25.Cluster6850cbin.1  | 98.97  | 3.390 | 135 |
| Sample_SPB25.mb.68              | 100.00 | 1.148 | 34  |
| Sample_SPB25.mb.62cbin.1        | 94.64  | 4.603 | 355 |
| Sample_SPB25.mb.95cbin.1        | 98.37  | 1.108 | 162 |
| Sample_SPB26.Cluster13102       | 92.41  | 1.123 | 16  |
| Sample_SPB26.Cluster128cbin.1   | 93.95  | 0.692 | 42  |
| Sample_SPB26.Cluster1230cbin.1  | 98.79  | 0.806 | 18  |
| Sample_SPB26.Cluster1477cbin.1  | 86.68  | 0.000 | 43  |
| Sample_SPB26.mb.27cbin.1        | 89.16  | 2.121 | 149 |
| Sample_SPB26.Cluster12694       | 98.40  | 0.800 | 92  |
| Sample_SPB26.Cluster7424        | 94.59  | 1.351 | 27  |
| Sample_SPB26.mb.30              | 98.38  | 2.419 | 40  |
| Sample_SPB26.mb.117             | 91.65  | 1.342 | 38  |
| Sample_SPB26.Cluster11079       | 99.32  | 1.006 | 15  |
| Sample_SPB26.Cluster4030        | 97.04  | 0.671 | 26  |
| Sample_SPB26.Cluster787         | 99.06  | 0.545 | 37  |
| Sample_SPB26.Cluster948cbin.1   | 98.65  | 1.612 | 36  |
| Sample_SPB26.Cluster503cbin.1   | 99.55  | 4.277 | 30  |
| Sample_SPB26.Cluster1166cbin.1  | 97.95  | 1.360 | 35  |
| Sample_SPB26.mb.103             | 87.25  | 0.000 | 35  |

|                                 |       |       |     |
|---------------------------------|-------|-------|-----|
| Sample_SPB26.mb.65              | 95.80 | 1.165 | 94  |
| Sample_SPB26.mb.37              | 93.91 | 2.702 | 97  |
| Sample_SPB26.Cluster11740cbin.1 | 99.02 | 0.000 | 73  |
| Sample_SPB26.mb.73cbin.1        | 89.18 | 0.000 | 237 |
| Sample_SPB26.Cluster96          | 99.11 | 0.591 | 59  |
| Sample_SPB26.mb.12              | 97.27 | 1.708 | 24  |
| Sample_SPB26.Cluster10643cbin.1 | 90.00 | 0.000 | 24  |
| Sample_SPB26.mb.112             | 83.27 | 0.377 | 119 |
| Sample_SPB26.mb.16              | 95.28 | 0.943 | 73  |
| Sample_SPB26.mb.7               | 98.15 | 0.806 | 83  |
| Sample_SPB26.Cluster7918cbin.1  | 98.92 | 0.537 | 103 |
| Sample_SPB26.mb.88              | 87.74 | 3.378 | 568 |
| Sample_SPB26.mb.34cbin.1        | 99.51 | 0.000 | 52  |
| Sample_SPB26.mb.33              | 86.74 | 1.753 | 168 |
| Sample_SPB26.mb.92              | 89.26 | 4.086 | 56  |
| Sample_SPB26.mb.23              | 88.51 | 4.601 | 88  |
| Sample_SPB26.mb.77              | 94.35 | 0.909 | 70  |
| Sample_SPB26.Cluster9006cbin.1  | 95.52 | 1.165 | 262 |
| Sample_SPB26.mb.91              | 98.65 | 0.000 | 63  |
| Sample_SPB26.mb.69              | 85.60 | 1.570 | 215 |
| Sample_SPB26.Cluster1013cbin.1  | 97.07 | 2.440 | 212 |
| Sample_SPB27.Cluster2043cbin.1  | 93.93 | 1.342 | 24  |
| Sample_SPB27.Cluster3466cbin.1  | 83.80 | 0.061 | 270 |
| Sample_SPB27.mb.25cbin.1        | 99.30 | 1.165 | 70  |
| Sample_SPB27.mb.24cbin.1        | 97.98 | 1.342 | 105 |
| Sample_SPB27.mb.40cbin.1        | 81.45 | 1.426 | 350 |
| Sample_SPB27.mb.27cbin.1        | 91.27 | 2.013 | 38  |
| Sample_SPB27.Cluster2426cbin.1  | 99.18 | 1.086 | 86  |
| Sample_SPB27.mb.19cbin.1        | 96.64 | 0.671 | 116 |
| Sample_SPB27.Cluster1597cbin.1  | 91.77 | 0.021 | 60  |
| Sample_SPB27.Cluster210cbin.1   | 93.65 | 2.312 | 219 |
| Sample_SPB27.Cluster57cbin.1    | 92.51 | 0.000 | 73  |
| Sample_SPB27.Cluster6184        | 95.70 | 0.335 | 38  |
| Sample_SPB27.mb.21              | 94.71 | 0.961 | 33  |
| Sample_SPB27.Cluster1327        | 97.04 | 0.000 | 20  |
| Sample_SPB27.mb.42              | 84.98 | 4.761 | 69  |
| Sample_SPB27.mb.22              | 83.22 | 0.000 | 22  |
| Sample_SPB27.mb.45              | 86.68 | 1.740 | 271 |
| Sample_SPB27.mb.26cbin.1        | 97.69 | 0.268 | 25  |
| Sample_SPB27.Cluster5753cbin.1  | 97.58 | 3.131 | 45  |
| Sample_SPB27.mb.56              | 91.26 | 1.995 | 394 |
| Sample_SPB27.mb.77cbin.1        | 89.83 | 0.000 | 285 |
| Sample_SPB27.mb.34cbin.1        | 87.97 | 0.000 | 70  |
| Sample_SPB27.mb.66cbin.1        | 97.66 | 2.807 | 44  |
| Sample_SPB27.mb.70              | 92.77 | 0.675 | 227 |
| Sample_SPB27.Cluster2757cbin.1  | 83.45 | 1.164 | 593 |
| Sample_SPB27.mb.52cbin.1        | 95.41 | 1.690 | 89  |
| Sample_SPB27.mb.29              | 98.42 | 0.000 | 33  |
| Sample_SPB27.mb.38              | 93.17 | 0.000 | 49  |
| Sample_SPB27.mb.88              | 92.75 | 0.000 | 32  |
| Sample_SPB27.mb.63              | 98.83 | 0.480 | 30  |
| Sample_SPB27.Cluster2220        | 99.34 | 1.582 | 48  |
| Sample_SPB27.mb.10              | 96.31 | 0.000 | 36  |
| Sample_SPB27.Cluster4319cbin.1  | 99.61 | 1.666 | 87  |
| Sample_SPB27.mb.48cbin.1        | 97.54 | 0.929 | 80  |
| Sample_SPB27.mb.54              | 95.77 | 1.550 | 90  |
| Sample_SPB28.mb.43              | 91.61 | 1.677 | 277 |
| Sample_SPB28.Cluster2207cbin.1  | 85.78 | 1.317 | 324 |

|                                |        |       |     |
|--------------------------------|--------|-------|-----|
| Sample_SPB28.Cluster212        | 99.19  | 0.806 | 40  |
| Sample_SPB28.mb.30cbin.1       | 90.82  | 3.380 | 227 |
| Sample_SPB28.Cluster6615cbin.1 | 93.33  | 3.645 | 295 |
| Sample_SPB28.Cluster7542       | 99.32  | 0.671 | 30  |
| Sample_SPB28.Cluster6082       | 98.65  | 0.000 | 20  |
| Sample_SPB28.mb.19             | 94.20  | 2.403 | 67  |
| Sample_SPB28.Cluster9014cbin.1 | 98.65  | 1.342 | 47  |
| Sample_SPB28.Cluster5597cbin.1 | 94.38  | 2.076 | 211 |
| Sample_SPB28.mb.47             | 97.61  | 0.680 | 222 |
| Sample_SPB28.mb.70cbin.1       | 94.69  | 0.335 | 97  |
| Sample_SPB28.mb.57             | 94.89  | 2.551 | 92  |
| Sample_SPB28.mb.78cbin.1       | 97.30  | 0.842 | 89  |
| Sample_SPB28.mb.35             | 88.49  | 2.215 | 108 |
| Sample_SPB28.Cluster4850cbin.1 | 92.02  | 1.177 | 369 |
| Sample_SPB28.mb.56             | 97.31  | 0.838 | 127 |
| Sample_SPB28.mb.13             | 99.31  | 0.738 | 115 |
| Sample_SPB28.mb.51cbin.1       | 83.98  | 0.632 | 63  |
| Sample_SPB28.mb.71cbin.1       | 98.53  | 4.412 | 55  |
| Sample_SPB28.mb.89cbin.1       | 96.53  | 2.878 | 117 |
| Sample_SPB28.mb.65             | 98.63  | 0.265 | 67  |
| Sample_SPB28.Cluster4528cbin.1 | 96.47  | 3.076 | 354 |
| Sample_SPB28.mb.32cbin.1       | 89.69  | 0.555 | 481 |
| Sample_SPB28.Cluster35         | 95.63  | 0.359 | 93  |
| Sample_SPB30.Cluster3079cbin.1 | 82.36  | 1.724 | 543 |
| Sample_SPB30.Cluster4134       | 92.93  | 1.342 | 20  |
| Sample_SPB30.Cluster814cbin.1  | 99.30  | 1.165 | 77  |
| Sample_SPB30.Cluster9210       | 94.96  | 0.000 | 35  |
| Sample_SPB30.Cluster3409cbin.1 | 89.24  | 0.021 | 60  |
| Sample_SPB30.Cluster2181       | 93.42  | 0.961 | 23  |
| Sample_SPB30.mb.19             | 83.87  | 0.000 | 27  |
| Sample_SPB30.mb.68             | 82.63  | 0.559 | 389 |
| Sample_SPB30.Cluster3620       | 96.60  | 0.335 | 12  |
| Sample_SPB30.mb.27cbin.1       | 92.61  | 1.972 | 120 |
| Sample_SPB30.Cluster1481cbin.1 | 92.45  | 3.746 | 151 |
| Sample_SPB30.Cluster10678      | 96.54  | 0.000 | 71  |
| Sample_SPB30.Cluster422cbin.1  | 99.11  | 0.000 | 24  |
| Sample_SPB30.mb.22             | 95.91  | 0.000 | 15  |
| Sample_SPB30.mb.35             | 93.04  | 1.901 | 252 |
| Sample_SPB30.mb.34cbin.1       | 93.42  | 2.040 | 248 |
| Sample_SPB30.mb.47cbin.1       | 98.65  | 0.943 | 76  |
| Sample_SPB30.mb.70             | 83.19  | 2.908 | 189 |
| Sample_SPB30.mb.5cbin.1        | 95.97  | 0.000 | 143 |
| Sample_SPB30.mb.43             | 93.31  | 1.133 | 250 |
| Sample_SPB30.mb.29             | 97.95  | 0.000 | 19  |
| Sample_SPB30.mb.80             | 93.73  | 0.279 | 145 |
| Sample_SPB30.mb.31             | 95.18  | 1.463 | 175 |
| Sample_SPB30.mb.26             | 96.68  | 0.000 | 50  |
| Sample_SPB30.mb.57cbin.1       | 87.98  | 0.480 | 31  |
| Sample_SPB30.mb.58cbin.1       | 98.02  | 1.875 | 24  |
| Sample_SPB30.mb.41cbin.1       | 95.89  | 1.534 | 131 |
| Sample_SPB30.Cluster8968       | 95.69  | 0.842 | 138 |
| Sample_SPB30.Cluster4912cbin.1 | 99.46  | 0.806 | 116 |
| Sample_SPB30.mb.74             | 90.86  | 0.000 | 13  |
| Sample_SPB30.mb.46cbin.1       | 94.27  | 0.480 | 21  |
| Sample_SPB30.mb.81cbin.1       | 94.18  | 0.000 | 37  |
| Sample_SPB30.mb.92             | 92.95  | 2.745 | 95  |
| Sample_SPB30.mb.72             | 100.00 | 0.636 | 33  |
| Sample_SPB30.mb.93             | 85.75  | 2.531 | 387 |

|                                 |       |       |     |
|---------------------------------|-------|-------|-----|
| Sample_SPB30.mb.9               | 99.32 | 0.000 | 23  |
| Sample_SPB30.mb.94cbin.1        | 92.28 | 0.671 | 175 |
| Sample_SPB30.mb.53              | 91.53 | 0.093 | 39  |
| Sample_SPB30.mb.10cbin.1        | 92.91 | 2.695 | 275 |
| Sample_SPB31.Cluster13260       | 89.32 | 2.969 | 64  |
| Sample_SPB31.Cluster3560        | 92.93 | 1.342 | 29  |
| Sample_SPB31.mb.50cbin.1        | 83.12 | 4.310 | 155 |
| Sample_SPB31.Cluster2308cbin.1  | 87.13 | 0.061 | 250 |
| Sample_SPB31.mb.21              | 92.17 | 0.671 | 20  |
| Sample_SPB31.Cluster89          | 91.27 | 0.671 | 56  |
| Sample_SPB31.mb.4               | 95.39 | 0.000 | 42  |
| Sample_SPB31.Cluster4714        | 98.20 | 0.898 | 36  |
| Sample_SPB31.mb.19              | 85.01 | 1.250 | 75  |
| Sample_SPB31.mb.46              | 97.65 | 0.335 | 89  |
| Sample_SPB31.mb.72cbin.1        | 96.45 | 1.221 | 167 |
| Sample_SPB31.mb.1               | 86.57 | 0.335 | 17  |
| Sample_SPB31.mb.76              | 93.14 | 0.000 | 44  |
| Sample_SPB31.Cluster10043cbin.1 | 88.31 | 1.719 | 345 |
| Sample_SPB31.mb.15              | 96.29 | 1.739 | 129 |
| Sample_SPB31.Cluster6381        | 97.09 | 1.342 | 22  |
| Sample_SPB31.Cluster13048       | 99.47 | 0.000 | 33  |
| Sample_SPB31.Cluster291         | 99.11 | 0.000 | 35  |
| Sample_SPB31.mb.63              | 87.15 | 1.275 | 265 |
| Sample_SPB31.mb.40              | 98.02 | 1.230 | 93  |
| Sample_SPB31.mb.27cbin.1        | 92.81 | 3.752 | 234 |
| Sample_SPB31.mb.86              | 89.82 | 0.581 | 68  |
| Sample_SPB31.mb.64              | 95.86 | 1.403 | 211 |
| Sample_SPB31.mb.25              | 88.33 | 1.783 | 105 |
| Sample_SPB31.Cluster8738        | 98.06 | 0.483 | 78  |
| Sample_SPB31.mb.107cbin.1       | 86.25 | 0.186 | 112 |
| Sample_SPB31.mb.42              | 96.57 | 0.000 | 89  |
| Sample_SPB31.mb.90              | 88.01 | 0.185 | 216 |
| Sample_SPB31.mb.85cbin.1        | 93.85 | 1.845 | 226 |
| Sample_SPB31.mb.93              | 89.70 | 1.260 | 135 |
| Sample_SPB31.mb.23              | 99.19 | 4.042 | 93  |
| Sample_SPB31.Cluster5530        | 97.19 | 0.384 | 61  |
| Sample_SPB31.mb.78              | 99.24 | 0.000 | 20  |
| Sample_SPB31.mb.41              | 97.91 | 1.253 | 193 |
| Sample_SPB31.Cluster35cbin.1    | 97.51 | 0.553 | 84  |
| Sample_SPB32.mb.100             | 93.54 | 0.000 | 43  |
| Sample_SPB32.Cluster6265cbin.1  | 99.32 | 1.342 | 12  |
| Sample_SPB32.mb.13cbin.1        | 85.90 | 0.671 | 27  |
| Sample_SPB32.mb.11              | 93.73 | 0.671 | 65  |
| Sample_SPB32.Cluster3095cbin.1  | 93.14 | 2.531 | 224 |
| Sample_SPB32.Cluster2891cbin.1  | 98.42 | 0.289 | 24  |
| Sample_SPB32.Cluster4348cbin.1  | 99.32 | 0.000 | 18  |
| Sample_SPB32.Cluster11cbin.1    | 88.65 | 2.210 | 97  |
| Sample_SPB32.Cluster142         | 93.75 | 0.000 | 137 |
| Sample_SPB32.mb.95cbin.1        | 81.06 | 1.898 | 194 |
| Sample_SPB32.Cluster110         | 99.55 | 0.000 | 25  |
| Sample_SPB32.mb.18              | 94.58 | 1.932 | 77  |
| Sample_SPB32.Cluster161cbin.1   | 99.03 | 0.000 | 23  |
| Sample_SPB32.mb.53cbin.1        | 85.92 | 4.648 | 187 |
| Sample_SPB32.Cluster2789        | 91.45 | 0.632 | 82  |
| Sample_SPB32.Cluster5551cbin.1  | 94.33 | 0.000 | 77  |
| Sample_SPB32.mb.47              | 95.56 | 0.632 | 158 |
| Sample_SPB32.Cluster4022cbin.1  | 82.36 | 3.308 | 306 |
| Sample_SPB32.mb.5               | 85.47 | 0.675 | 68  |

|                                |       |       |     |
|--------------------------------|-------|-------|-----|
| Sample_SPB32.mb.104cbin.1      | 85.33 | 1.008 | 145 |
| Sample_SPB32.Cluster3715       | 94.63 | 0.000 | 38  |
| Sample_SPB32.mb.39             | 87.52 | 1.169 | 203 |
| Sample_SPB32.mb.93cbin.1       | 95.59 | 0.961 | 24  |
| Sample_SPB32.mb.29             | 96.77 | 0.000 | 70  |
| Sample_SPB32.mb.57cbin.1       | 92.40 | 1.265 | 50  |
| Sample_SPB32.mb.70cbin.1       | 97.45 | 0.636 | 35  |
| Sample_SPB32.mb.64             | 92.05 | 2.214 | 48  |
| Sample_SPB32.Cluster3691cbin.1 | 92.67 | 4.719 | 323 |
| Sample_SPB32.Cluster1224cbin.1 | 97.30 | 1.282 | 227 |
| Sample_SPB32.mb.86cbin.1       | 95.73 | 2.219 | 122 |
| Sample_SPB32.mb.96cbin.1       | 99.51 | 2.161 | 117 |
| Sample_SPB32.Cluster1850cbin.1 | 94.00 | 1.115 | 43  |
| Sample_SPB32.mb.107cbin.1      | 98.46 | 0.576 | 38  |
| Sample_SPB32.mb.78cbin.1       | 82.75 | 1.320 | 298 |
| Sample_SPB34.Cluster8235       | 82.45 | 0.000 | 44  |
| Sample_SPB34.Cluster2119cbin.1 | 90.78 | 0.000 | 68  |
| Sample_SPB34.Cluster219cbin.1  | 94.18 | 3.355 | 286 |
| Sample_SPB34.Cluster8435       | 81.87 | 0.000 | 21  |
| Sample_SPB34.Cluster11cbin.1   | 81.63 | 3.451 | 337 |
| Sample_SPB34.Cluster1214cbin.1 | 97.31 | 0.711 | 58  |
| Sample_SPB34.Cluster5423cbin.1 | 90.15 | 0.335 | 187 |
| Sample_SPB34.mb.10             | 95.19 | 1.442 | 62  |
| Sample_SPB34.mb.63             | 93.95 | 1.454 | 131 |
| Sample_SPB34.mb.103cbin.1      | 87.87 | 0.000 | 46  |
| Sample_SPB34.Cluster1265cbin.1 | 98.75 | 1.250 | 60  |
| Sample_SPB34.Cluster6727cbin.1 | 98.65 | 2.684 | 43  |
| Sample_SPB34.mb.43             | 90.45 | 0.806 | 72  |
| Sample_SPB34.Cluster9258       | 84.36 | 0.061 | 289 |
| Sample_SPB34.Cluster6494cbin.1 | 97.82 | 0.000 | 86  |
| Sample_SPB34.mb.58cbin.1       | 97.31 | 3.020 | 90  |
| Sample_SPB34.Cluster6796cbin.1 | 97.10 | 0.724 | 150 |
| Sample_SPB34.mb.71             | 98.65 | 1.342 | 50  |
| Sample_SPB34.Cluster2430cbin.1 | 97.66 | 3.735 | 406 |
| Sample_SPB34.mb.105            | 93.56 | 4.554 | 322 |
| Sample_SPB34.Cluster11702      | 98.87 | 1.123 | 54  |
| Sample_SPB34.mb.107            | 80.59 | 0.621 | 97  |
| Sample_SPB34.mb.8cbin.1        | 84.10 | 1.677 | 331 |
| Sample_SPB34.mb.90             | 87.24 | 0.000 | 99  |
| Sample_SPB34.Cluster9277cbin.1 | 98.38 | 0.000 | 92  |
| Sample_SPB34.mb.96cbin.1       | 95.57 | 0.743 | 73  |
| Sample_SPB34.mb.52             | 97.58 | 1.132 | 158 |
| Sample_SPB34.mb.80             | 95.75 | 3.605 | 144 |
| Sample_SPB34.mb.60             | 96.21 | 1.207 | 93  |
| Sample_SPB34.mb.6              | 92.46 | 4.388 | 253 |
| Sample_SPB34.mb.2cbin.1        | 91.26 | 1.198 | 418 |
| Sample_SPB34.mb.78cbin.1       | 95.51 | 2.826 | 98  |
| Sample_SPB34.mb.91             | 98.05 | 1.169 | 131 |
| Sample_SPB34.mb.72cbin.1       | 93.84 | 3.076 | 144 |
| Sample_SPB35.Cluster13733      | 84.99 | 3.370 | 38  |
| Sample_SPB35.Cluster13575      | 92.41 | 2.247 | 23  |
| Sample_SPB35.Cluster2519       | 95.69 | 0.000 | 139 |
| Sample_SPB35.Cluster10159      | 95.97 | 2.684 | 24  |
| Sample_SPB35.mb.29             | 84.26 | 3.745 | 72  |
| Sample_SPB35.Cluster9089       | 98.65 | 0.000 | 30  |
| Sample_SPB35.mb.118cbin.1      | 91.70 | 1.398 | 10  |
| Sample_SPB35.mb.24cbin.1       | 93.88 | 3.561 | 179 |
| Sample_SPB35.mb.112            | 83.89 | 0.000 | 17  |

|                                 |        |       |     |
|---------------------------------|--------|-------|-----|
| Sample_SPB35.Cluster5949cbin.1  | 87.69  | 2.013 | 55  |
| Sample_SPB35.Cluster902cbin.1   | 87.69  | 2.908 | 241 |
| Sample_SPB35.mb.107             | 86.07  | 1.342 | 51  |
| Sample_SPB35.mb.47              | 93.82  | 1.123 | 45  |
| Sample_SPB35.Cluster47cbin.1    | 95.16  | 1.008 | 51  |
| Sample_SPB35.Cluster6306        | 94.10  | 2.294 | 66  |
| Sample_SPB35.Cluster932cbin.1   | 82.87  | 3.216 | 830 |
| Sample_SPB35.mb.114cbin.1       | 96.42  | 3.355 | 84  |
| Sample_SPB35.Cluster11811cbin.1 | 92.60  | 0.000 | 216 |
| Sample_SPB35.Cluster134         | 97.27  | 0.000 | 49  |
| Sample_SPB35.Cluster2001        | 98.75  | 0.625 | 43  |
| Sample_SPB35.Cluster9269        | 97.09  | 0.671 | 24  |
| Sample_SPB35.mb.85cbin.1        | 91.57  | 1.123 | 19  |
| Sample_SPB35.Cluster495cbin.1   | 99.54  | 0.075 | 27  |
| Sample_SPB35.mb.106             | 88.70  | 4.308 | 276 |
| Sample_SPB35.mb.17cbin.1        | 92.95  | 4.423 | 98  |
| Sample_SPB35.Cluster9599        | 96.64  | 0.000 | 48  |
| Sample_SPB35.mb.110             | 97.40  | 1.594 | 49  |
| Sample_SPB35.mb.100             | 100.00 | 0.000 | 16  |
| Sample_SPB35.mb.54cbin.1        | 92.33  | 1.454 | 262 |
| Sample_SPB35.mb.30              | 97.65  | 1.342 | 111 |
| Sample_SPB35.mb.83              | 82.36  | 0.000 | 242 |
| Sample_SPB35.mb.25cbin.1        | 96.09  | 0.335 | 122 |
| Sample_SPB35.mb.8cbin.1         | 90.55  | 2.097 | 27  |
| Sample_SPB35.mb.76cbin.1        | 97.76  | 0.335 | 29  |
| Sample_SPB35.mb.45cbin.1        | 81.15  | 1.342 | 61  |
| Sample_SPB35.mb.95              | 83.83  | 0.713 | 33  |
| Sample_SPB35.mb.57cbin.1        | 81.87  | 2.013 | 80  |
| Sample_SPB35.mb.49cbin.1        | 97.09  | 0.671 | 132 |
| Sample_SPB35.mb.67cbin.1        | 91.27  | 1.006 | 57  |
| Sample_SPB35.mb.41cbin.1        | 97.02  | 3.416 | 241 |
| Sample_SPB35.mb.82cbin.1        | 92.91  | 1.230 | 112 |
| Sample_SPB35.mb.66cbin.1        | 93.44  | 0.000 | 293 |
| Sample_SPB35.Cluster428         | 98.80  | 0.074 | 29  |
| Sample_SPB36.Cluster48cbin.1    | 85.36  | 1.342 | 302 |
| Sample_SPB36.mb.102             | 82.41  | 0.000 | 171 |
| Sample_SPB36.mb.51              | 91.57  | 0.561 | 21  |
| Sample_SPB36.mb.39              | 89.20  | 0.335 | 210 |
| Sample_SPB36.mb.4               | 88.88  | 0.854 | 23  |
| Sample_SPB36.mb.57cbin.1        | 95.80  | 1.165 | 132 |
| Sample_SPB36.mb.74cbin.1        | 95.96  | 0.806 | 45  |
| Sample_SPB36.Cluster4543cbin.1  | 95.88  | 1.265 | 191 |
| Sample_SPB36.Cluster3595        | 92.78  | 0.480 | 20  |
| Sample_SPB36.Cluster4053cbin.1  | 95.97  | 2.013 | 55  |
| Sample_SPB36.mb.50              | 86.91  | 1.342 | 47  |
| Sample_SPB36.Cluster3243cbin.1  | 90.47  | 0.680 | 25  |
| Sample_SPB36.Cluster136cbin.1   | 93.87  | 0.157 | 56  |
| Sample_SPB36.mb.58              | 88.22  | 3.299 | 119 |
| Sample_SPB36.mb.15              | 97.27  | 1.342 | 25  |
| Sample_SPB36.Cluster977         | 99.55  | 0.000 | 27  |
| Sample_SPB36.mb.76              | 88.82  | 1.342 | 111 |
| Sample_SPB36.mb.23cbin.1        | 96.39  | 3.189 | 45  |
| Sample_SPB36.mb.85              | 98.22  | 0.838 | 131 |
| Sample_SPB36.mb.37              | 97.31  | 0.000 | 119 |
| Sample_SPB36.mb.38              | 98.06  | 0.060 | 44  |
| Sample_SPB36.mb.67              | 90.96  | 3.265 | 158 |
| Sample_SPB36.mb.9cbin.1         | 98.65  | 0.335 | 38  |
| Sample_SPB36.mb.106             | 92.93  | 1.050 | 38  |

|                                 |       |       |     |
|---------------------------------|-------|-------|-----|
| Sample_SPB36.mb.5               | 88.05 | 4.062 | 99  |
| Sample_SPB36.mb.63cbin.1        | 93.60 | 3.404 | 174 |
| Sample_SPB36.Cluster9234cbin.1  | 99.31 | 0.646 | 73  |
| Sample_SPB37.Cluster5612cbin.1  | 81.09 | 0.000 | 99  |
| Sample_SPB37.mb.131             | 81.55 | 0.000 | 36  |
| Sample_SPB37.Cluster444cbin.1   | 92.61 | 2.013 | 31  |
| Sample_SPB37.mb.18              | 94.40 | 0.000 | 39  |
| Sample_SPB37.mb.10              | 86.57 | 0.671 | 70  |
| Sample_SPB37.mb.109             | 94.63 | 0.083 | 25  |
| Sample_SPB37.Cluster11531       | 97.30 | 0.707 | 97  |
| Sample_SPB37.Cluster219cbin.1   | 91.39 | 1.478 | 63  |
| Sample_SPB37.mb.107             | 89.26 | 0.793 | 54  |
| Sample_SPB37.Cluster3269cbin.1  | 93.75 | 0.961 | 44  |
| Sample_SPB37.Cluster10324       | 97.98 | 0.671 | 17  |
| Sample_SPB37.mb.103cbin.1       | 96.42 | 2.684 | 177 |
| Sample_SPB37.mb.32              | 94.87 | 1.515 | 266 |
| Sample_SPB37.Cluster4525        | 96.93 | 0.000 | 13  |
| Sample_SPB37.Cluster285cbin.1   | 87.11 | 0.296 | 37  |
| Sample_SPB37.Cluster57cbin.1    | 97.44 | 1.183 | 142 |
| Sample_SPB37.Cluster7811        | 88.59 | 0.671 | 13  |
| Sample_SPB37.mb.141cbin.1       | 99.18 | 0.000 | 34  |
| Sample_SPB37.mb.142             | 94.44 | 0.000 | 204 |
| Sample_SPB37.Cluster1449cbin.1  | 90.41 | 0.454 | 72  |
| Sample_SPB37.Cluster11556cbin.1 | 99.52 | 0.472 | 27  |
| Sample_SPB37.Cluster399cbin.1   | 97.17 | 0.998 | 100 |
| Sample_SPB37.mb.127             | 90.61 | 1.360 | 241 |
| Sample_SPB37.mb.105             | 94.46 | 0.223 | 88  |
| Sample_SPB37.mb.112cbin.1       | 99.47 | 0.000 | 35  |
| Sample_SPB37.mb.29cbin.1        | 92.40 | 0.632 | 62  |
| Sample_SPB37.mb.102             | 89.46 | 1.169 | 206 |
| Sample_SPB37.mb.30cbin.1        | 96.13 | 0.757 | 53  |
| Sample_SPB37.mb.17cbin.1        | 92.25 | 1.869 | 208 |
| Sample_SPB37.mb.63              | 83.22 | 0.000 | 36  |
| Sample_SPB37.mb.44cbin.1        | 84.17 | 0.020 | 176 |
| Sample_SPB37.mb.13cbin.1        | 90.43 | 0.000 | 25  |
| Sample_SPB37.mb.76cbin.1        | 95.40 | 1.265 | 168 |
| Sample_SPB37.mb.40cbin.1        | 91.28 | 0.241 | 258 |
| Sample_SPB37.Cluster6256cbin.1  | 98.73 | 3.069 | 204 |
| Sample_SPB37.mb.82cbin.1        | 94.59 | 0.675 | 69  |
| Sample_SPB37.mb.73cbin.1        | 88.43 | 0.680 | 134 |
| Sample_SPB37.mb.39              | 95.65 | 1.242 | 158 |
| Sample_SPB37.mb.52              | 93.78 | 0.961 | 30  |
| Sample_SPB37.mb.90cbin.1        | 80.78 | 1.913 | 50  |
| Sample_SPB37.mb.8cbin.1         | 98.13 | 0.000 | 30  |
| Sample_SPB37.mb.69cbin.1        | 96.42 | 4.033 | 123 |
| Sample_SPB37.mb.75cbin.1        | 90.93 | 2.460 | 280 |
| Sample_SPB37.Cluster6931cbin.1  | 96.59 | 0.128 | 107 |
| Sample_SPB37.mb.62cbin.1        | 96.80 | 0.598 | 121 |
| Sample_SPB37.mb.42              | 96.24 | 1.959 | 135 |
| Sample_SPB37.mb.4cbin.1         | 99.61 | 0.000 | 50  |
| Sample_SPB38.Cluster33cbin.1    | 90.93 | 4.942 | 174 |
| Sample_SPB38.mb.29cbin.1        | 89.36 | 2.147 | 194 |
| Sample_SPB38.Cluster9738cbin.1  | 93.53 | 1.785 | 113 |
| Sample_SPB38.Cluster404         | 99.19 | 1.612 | 30  |
| Sample_SPB38.mb.32cbin.1        | 91.54 | 0.671 | 254 |
| Sample_SPB38.mb.4               | 95.56 | 2.531 | 249 |
| Sample_SPB38.Cluster1235cbin.1  | 95.18 | 0.000 | 66  |
| Sample_SPB38.Cluster8110        | 99.32 | 1.677 | 13  |

|                                 |        |       |     |
|---------------------------------|--------|-------|-----|
| Sample_SPB38.Cluster6151cbin.1  | 91.82  | 2.534 | 247 |
| Sample_SPB38.Cluster2495        | 100.00 | 0.480 | 23  |
| Sample_SPB38.mb.5               | 89.39  | 2.531 | 237 |
| Sample_SPB38.mb.26cbin.1        | 97.98  | 0.335 | 29  |
| Sample_SPB38.mb.38cbin.1        | 90.15  | 1.808 | 298 |
| Sample_SPB38.Cluster51cbin.1    | 94.36  | 0.345 | 518 |
| Sample_SPB38.mb.78              | 93.02  | 1.906 | 227 |
| Sample_SPB38.Cluster7246cbin.1  | 99.11  | 0.724 | 62  |
| Sample_SPB38.mb.81              | 99.19  | 0.195 | 20  |
| Sample_SPB38.mb.67cbin.1        | 92.54  | 0.769 | 91  |
| Sample_SPB38.Cluster5633        | 93.42  | 0.373 | 63  |
| Sample_SPB38.mb.60              | 93.28  | 0.000 | 51  |
| Sample_SPB38.mb.83              | 82.21  | 0.000 | 122 |
| Sample_SPB38.Cluster6964        | 99.24  | 2.019 | 21  |
| Sample_SPB38.mb.10cbin.1        | 93.78  | 1.282 | 50  |
| Sample_SPB38.mb.41cbin.1        | 97.95  | 0.000 | 58  |
| Sample_SPB38.mb.7               | 97.98  | 0.000 | 35  |
| Sample_SPB38.mb.75              | 99.54  | 0.961 | 59  |
| Sample_SPB38.mb.33cbin.1        | 90.37  | 4.042 | 334 |
| Sample_SPB38.mb.51              | 98.41  | 1.265 | 139 |
| Sample_SPB38.mb.34              | 96.49  | 0.576 | 275 |
| Sample_SPB38.mb.93cbin.1        | 96.18  | 2.649 | 133 |
| Sample_SPB38.mb.92cbin.1        | 96.45  | 2.969 | 184 |
| Sample_SPB38.mb.79              | 95.91  | 1.132 | 174 |
| Sample_SPB38.mb.91cbin.1        | 98.07  | 1.282 | 71  |
| Sample_SPB39.Cluster13847cbin.1 | 92.02  | 2.808 | 25  |
| Sample_SPB39.mb.20cbin.1        | 88.20  | 1.845 | 28  |
| Sample_SPB39.Cluster7601        | 92.17  | 0.671 | 17  |
| Sample_SPB39.mb.27              | 94.73  | 1.398 | 149 |
| Sample_SPB39.Cluster12504       | 84.43  | 0.707 | 223 |
| Sample_SPB39.mb.15cbin.1        | 92.72  | 0.223 | 213 |
| Sample_SPB39.mb.102             | 95.91  | 0.377 | 97  |
| Sample_SPB39.mb.64              | 81.43  | 0.915 | 179 |
| Sample_SPB39.Cluster2146cbin.1  | 94.65  | 1.789 | 140 |
| Sample_SPB39.mb.73              | 99.32  | 1.342 | 46  |
| Sample_SPB39.Cluster119         | 96.27  | 0.621 | 62  |
| Sample_SPB39.mb.72              | 93.52  | 0.671 | 232 |
| Sample_SPB39.Cluster8360        | 99.32  | 0.000 | 17  |
| Sample_SPB39.Cluster2005cbin.1  | 96.98  | 0.880 | 34  |
| Sample_SPB39.Cluster7507cbin.1  | 98.65  | 0.000 | 22  |
| Sample_SPB39.Cluster7097cbin.1  | 87.83  | 2.927 | 320 |
| Sample_SPB39.mb.50              | 96.27  | 0.000 | 14  |
| Sample_SPB39.mb.19              | 88.49  | 4.852 | 429 |
| Sample_SPB39.mb.100             | 82.15  | 3.044 | 362 |
| Sample_SPB39.mb.69              | 97.58  | 1.612 | 150 |
| Sample_SPB39.Cluster5922cbin.1  | 93.22  | 1.207 | 55  |
| Sample_SPB39.mb.65              | 96.15  | 1.939 | 40  |
| Sample_SPB39.mb.75cbin.1        | 87.30  | 2.879 | 277 |
| Sample_SPB39.mb.71cbin.1        | 98.65  | 0.671 | 76  |
| Sample_SPB39.mb.70              | 94.31  | 2.419 | 126 |
| Sample_SPB39.mb.94cbin.1        | 94.51  | 2.426 | 189 |
| Sample_SPB39.Cluster5967cbin.1  | 94.19  | 1.075 | 368 |
| Sample_SPB39.Cluster3079cbin.1  | 87.68  | 3.205 | 538 |
| Sample_SPB39.mb.4cbin.1         | 98.06  | 0.966 | 84  |
| Sample_SPB39.mb.18cbin.1        | 91.65  | 1.672 | 142 |
| Sample_SPB39.mb.9cbin.1         | 90.66  | 0.021 | 76  |
| Sample_SPB39.mb.6               | 97.73  | 0.377 | 63  |
| Sample_SPB39.mb.87              | 98.06  | 1.207 | 42  |



|                                 |        |       |     |
|---------------------------------|--------|-------|-----|
| Sample_SPB39.Cluster9689cbin.1  | 94.15  | 1.474 | 534 |
| Sample_SPB39.mb.104cbin.1       | 93.92  | 3.007 | 254 |
| Sample_SPB39.mb.97              | 97.98  | 0.000 | 40  |
| Sample_SPB39.mb.78              | 88.84  | 0.000 | 49  |
| Sample_SPB41.Cluster6743        | 92.40  | 0.699 | 6   |
| Sample_SPB41.Cluster10038cbin.1 | 98.65  | 0.692 | 25  |
| Sample_SPB41.mb.20              | 98.38  | 1.075 | 47  |
| Sample_SPB41.Cluster1256        | 83.38  | 0.000 | 33  |
| Sample_SPB41.Cluster220cbin.1   | 89.90  | 4.865 | 211 |
| Sample_SPB41.Cluster3956cbin.1  | 92.69  | 1.349 | 84  |
| Sample_SPB41.mb.16              | 81.97  | 4.138 | 419 |
| Sample_SPB41.mb.100cbin.1       | 82.55  | 1.677 | 98  |
| Sample_SPB41.mb.12              | 89.26  | 0.671 | 42  |
| Sample_SPB41.Cluster11656       | 100.00 | 0.000 | 45  |
| Sample_SPB41.Cluster6965        | 99.18  | 0.000 | 20  |
| Sample_SPB41.mb.71              | 92.41  | 2.247 | 26  |
| Sample_SPB41.Cluster6251        | 99.40  | 0.898 | 32  |
| Sample_SPB41.Cluster1709cbin.1  | 97.83  | 0.961 | 22  |
| Sample_SPB41.Cluster1542        | 97.95  | 0.000 | 24  |
| Sample_SPB41.mb.55              | 80.88  | 3.020 | 289 |
| Sample_SPB41.mb.63              | 98.60  | 2.564 | 135 |
| Sample_SPB41.Cluster500cbin.1   | 98.07  | 0.480 | 64  |
| Sample_SPB41.mb.81              | 93.26  | 1.342 | 48  |
| Sample_SPB41.Cluster706         | 100.00 | 2.592 | 20  |
| Sample_SPB41.mb.27              | 96.25  | 2.366 | 202 |
| Sample_SPB41.mb.19              | 91.24  | 1.901 | 276 |
| Sample_SPB41.mb.84              | 90.10  | 0.020 | 56  |
| Sample_SPB41.mb.30cbin.1        | 93.17  | 0.671 | 31  |
| Sample_SPB41.Cluster335cbin.1   | 97.98  | 2.348 | 46  |
| Sample_SPB41.mb.54              | 98.38  | 1.478 | 85  |
| Sample_SPB41.mb.65cbin.1        | 86.35  | 0.671 | 46  |
| Sample_SPB41.mb.25              | 98.63  | 0.000 | 76  |
| Sample_SPB41.mb.62cbin.1        | 97.11  | 1.442 | 62  |
| Sample_SPB41.Cluster6618cbin.1  | 98.38  | 0.000 | 220 |
| Sample_SPB41.mb.7               | 99.45  | 0.070 | 24  |
| Sample_SPB41.mb.88cbin.1        | 98.42  | 0.000 | 120 |
| Sample_SPB41.mb.67cbin.1        | 99.21  | 0.199 | 121 |
| Sample_SPB41.Cluster7206        | 97.99  | 3.097 | 48  |
| Sample_SPB41.mb.51cbin.1        | 91.89  | 2.005 | 206 |
| Sample_SPB41.mb.96              | 99.46  | 0.000 | 91  |
| Sample_SPB41.Cluster756cbin.1   | 98.62  | 0.394 | 217 |
| Sample_SPB42.Cluster18534       | 92.41  | 2.247 | 13  |
| Sample_SPB42.Cluster10349       | 86.49  | 0.806 | 24  |
| Sample_SPB42.mb.127             | 89.33  | 0.000 | 38  |
| Sample_SPB42.mb.104cbin.1       | 92.26  | 1.342 | 21  |
| Sample_SPB42.mb.11cbin.1        | 95.43  | 3.413 | 149 |
| Sample_SPB42.mb.106             | 90.79  | 1.515 | 394 |
| Sample_SPB42.Cluster10307       | 93.95  | 0.000 | 36  |
| Sample_SPB42.Cluster17197cbin.1 | 98.29  | 3.264 | 134 |
| Sample_SPB42.Cluster188cbin.1   | 93.87  | 3.378 | 135 |
| Sample_SPB42.Cluster89          | 87.58  | 2.393 | 101 |
| Sample_SPB42.Cluster656cbin.1   | 90.71  | 1.118 | 182 |
| Sample_SPB42.Cluster15277cbin.1 | 87.24  | 0.111 | 41  |
| Sample_SPB42.Cluster65cbin.1    | 89.65  | 4.362 | 172 |
| Sample_SPB42.mb.10              | 88.58  | 0.838 | 137 |
| Sample_SPB42.mb.32cbin.1        | 97.31  | 1.075 | 113 |
| Sample_SPB42.Cluster10714       | 95.07  | 0.000 | 21  |
| Sample_SPB42.Cluster582         | 100.00 | 0.790 | 21  |

|                                 |        |       |     |
|---------------------------------|--------|-------|-----|
| Sample_SPB42.mb.53              | 93.90  | 0.000 | 161 |
| Sample_SPB42.Cluster15132cbin.1 | 98.06  | 0.000 | 85  |
| Sample_SPB42.mb.140             | 92.02  | 1.006 | 103 |
| Sample_SPB42.Cluster877         | 97.95  | 0.000 | 39  |
| Sample_SPB42.mb.20              | 87.12  | 2.013 | 138 |
| Sample_SPB42.Cluster75cbin.1    | 96.89  | 1.242 | 150 |
| Sample_SPB42.mb.41              | 90.60  | 2.593 | 148 |
| Sample_SPB42.mb.15              | 94.71  | 0.961 | 24  |
| Sample_SPB42.Cluster8875cbin.1  | 98.19  | 0.289 | 137 |
| Sample_SPB42.mb.72cbin.1        | 86.32  | 1.006 | 258 |
| Sample_SPB42.mb.129             | 96.87  | 0.961 | 38  |
| Sample_SPB42.mb.116             | 99.62  | 0.000 | 20  |
| Sample_SPB42.mb.69cbin.1        | 89.53  | 2.534 | 322 |
| Sample_SPB42.mb.94cbin.1        | 89.81  | 1.006 | 226 |
| Sample_SPB42.mb.95cbin.1        | 96.60  | 0.782 | 52  |
| Sample_SPB42.mb.75cbin.1        | 94.77  | 2.034 | 202 |
| Sample_SPB42.mb.91cbin.1        | 89.04  | 3.236 | 174 |
| Sample_SPB42.Cluster2849cbin.1  | 98.63  | 0.766 | 35  |
| Sample_SPB42.mb.19cbin.1        | 93.52  | 1.141 | 357 |
| Sample_SPB45.Cluster12822       | 94.94  | 1.284 | 21  |
| Sample_SPB45.Cluster12958cbin.1 | 91.57  | 2.247 | 23  |
| Sample_SPB45.Cluster12862       | 86.79  | 0.000 | 24  |
| Sample_SPB45.Cluster1279cbin.1  | 88.50  | 3.091 | 216 |
| Sample_SPB45.Cluster3400cbin.1  | 98.38  | 0.000 | 47  |
| Sample_SPB45.mb.22cbin.1        | 85.08  | 1.612 | 40  |
| Sample_SPB45.Cluster2056        | 98.60  | 0.139 | 23  |
| Sample_SPB45.mb.26cbin.1        | 92.95  | 1.866 | 40  |
| Sample_SPB45.mb.16              | 95.80  | 1.165 | 76  |
| Sample_SPB45.mb.45              | 80.55  | 2.016 | 479 |
| Sample_SPB45.Cluster10521cbin.1 | 95.83  | 0.000 | 201 |
| Sample_SPB45.mb.11              | 89.66  | 2.348 | 105 |
| Sample_SPB45.mb.19              | 96.86  | 2.705 | 284 |
| Sample_SPB45.Cluster4014cbin.1  | 94.60  | 1.349 | 66  |
| Sample_SPB45.mb.39cbin.1        | 88.97  | 2.013 | 221 |
| Sample_SPB45.Cluster7580cbin.1  | 98.32  | 0.000 | 60  |
| Sample_SPB45.Cluster6181        | 97.87  | 0.731 | 47  |
| Sample_SPB45.mb.107cbin.1       | 85.34  | 0.000 | 36  |
| Sample_SPB45.mb.62              | 90.16  | 4.494 | 56  |
| Sample_SPB45.Cluster5347cbin.1  | 91.40  | 1.616 | 301 |
| Sample_SPB45.mb.48cbin.1        | 89.93  | 1.733 | 54  |
| Sample_SPB45.mb.25              | 81.98  | 1.342 | 91  |
| Sample_SPB45.Cluster3720cbin.1  | 90.33  | 1.342 | 19  |
| Sample_SPB45.mb.104cbin.1       | 89.06  | 3.027 | 378 |
| Sample_SPB45.Cluster12776       | 100.00 | 0.000 | 13  |
| Sample_SPB45.mb.5               | 80.82  | 2.684 | 248 |
| Sample_SPB45.Cluster2337        | 97.95  | 0.000 | 30  |
| Sample_SPB45.Cluster508         | 99.55  | 0.000 | 27  |
| Sample_SPB45.Cluster6995cbin.1  | 94.63  | 2.684 | 92  |
| Sample_SPB45.mb.20cbin.1        | 99.32  | 1.006 | 28  |
| Sample_SPB45.mb.76cbin.1        | 91.05  | 0.671 | 34  |
| Sample_SPB45.Cluster25cbin.1    | 92.68  | 1.140 | 211 |
| Sample_SPB45.mb.93              | 96.37  | 3.714 | 57  |
| Sample_SPB45.mb.80cbin.1        | 91.27  | 2.034 | 79  |
| Sample_SPB45.mb.75cbin.1        | 99.10  | 0.020 | 151 |
| Sample_SPB45.mb.60              | 92.25  | 0.000 | 28  |
| Sample_SPB45.mb.98              | 90.60  | 1.342 | 44  |
| Sample_SPB45.mb.81              | 93.03  | 0.696 | 189 |
| Sample_SPB45.mb.82              | 97.58  | 0.806 | 49  |

|                                 |        |       |     |
|---------------------------------|--------|-------|-----|
| Sample_SPB45.mb.78              | 84.74  | 0.000 | 26  |
| Sample_SPB45.mb.54              | 97.73  | 0.578 | 158 |
| Sample_SPB45.Cluster6357        | 99.61  | 0.576 | 83  |
| Sample_SPB45.mb.95cbin.1        | 88.70  | 1.802 | 342 |
| Sample_SPB45.mb.55cbin.1        | 85.87  | 0.557 | 109 |
| Sample_SPB45.mb.41cbin.1        | 97.27  | 0.705 | 336 |
| Sample_SPB45.mb.49              | 94.87  | 0.000 | 305 |
| Sample_SPB45.mb.87cbin.1        | 97.24  | 1.301 | 59  |
| Sample_SPB47.Cluster12751cbin.1 | 86.79  | 3.370 | 64  |
| Sample_SPB47.Cluster3739        | 96.62  | 0.000 | 8   |
| Sample_SPB47.Cluster2178cbin.1  | 85.71  | 0.000 | 32  |
| Sample_SPB47.Cluster12          | 82.53  | 1.174 | 222 |
| Sample_SPB47.Cluster22cbin.1    | 83.27  | 1.565 | 340 |
| Sample_SPB47.Cluster1652cbin.1  | 93.95  | 0.671 | 152 |
| Sample_SPB47.Cluster1233cbin.1  | 97.31  | 0.671 | 86  |
| Sample_SPB47.Cluster2232cbin.1  | 92.59  | 0.805 | 85  |
| Sample_SPB47.Cluster2856        | 96.64  | 0.000 | 23  |
| Sample_SPB47.mb.36              | 92.41  | 1.123 | 37  |
| Sample_SPB47.Cluster48cbin.1    | 97.31  | 1.275 | 44  |
| Sample_SPB47.Cluster1049cbin.1  | 89.31  | 1.442 | 30  |
| Sample_SPB47.Cluster1765        | 91.94  | 0.000 | 8   |
| Sample_SPB47.Cluster366cbin.1   | 93.53  | 1.020 | 213 |
| Sample_SPB47.Cluster5597        | 99.40  | 1.297 | 22  |
| Sample_SPB47.Cluster29cbin.1    | 95.41  | 0.591 | 155 |
| Sample_SPB47.mb.11              | 96.64  | 2.013 | 83  |
| Sample_SPB47.Cluster1190cbin.1  | 97.60  | 2.500 | 20  |
| Sample_SPB47.Cluster1024        | 98.75  | 0.625 | 21  |
| Sample_SPB47.mb.112             | 91.94  | 2.617 | 123 |
| Sample_SPB47.mb.25cbin.1        | 91.06  | 1.898 | 216 |
| Sample_SPB47.Cluster12280cbin.1 | 82.91  | 0.632 | 56  |
| Sample_SPB47.Cluster8455cbin.1  | 99.32  | 1.677 | 21  |
| Sample_SPB47.Cluster7105cbin.1  | 98.65  | 0.000 | 23  |
| Sample_SPB47.Cluster10640cbin.1 | 96.47  | 1.194 | 213 |
| Sample_SPB47.mb.44              | 83.87  | 2.908 | 242 |
| Sample_SPB47.Cluster10470       | 98.11  | 0.754 | 91  |
| Sample_SPB47.Cluster8504        | 99.51  | 0.000 | 71  |
| Sample_SPB47.mb.86              | 94.35  | 0.806 | 40  |
| Sample_SPB47.mb.122             | 93.78  | 4.775 | 167 |
| Sample_SPB47.mb.14              | 97.50  | 0.625 | 55  |
| Sample_SPB47.mb.43cbin.1        | 87.42  | 0.848 | 333 |
| Sample_SPB47.mb.41              | 89.11  | 0.000 | 77  |
| Sample_SPB47.mb.30cbin.1        | 83.46  | 1.186 | 254 |
| Sample_SPB47.mb.37              | 92.66  | 0.961 | 179 |
| Sample_SPB47.mb.125             | 88.88  | 0.701 | 225 |
| Sample_SPB47.mb.99              | 92.61  | 1.342 | 112 |
| Sample_SPB47.mb.57              | 88.87  | 3.117 | 64  |
| Sample_SPB47.Cluster7084cbin.1  | 98.92  | 0.537 | 63  |
| Sample_SPB47.Cluster4651        | 98.84  | 0.961 | 78  |
| Sample_SPB47.mb.79cbin.1        | 92.06  | 2.277 | 284 |
| Sample_SPB47.mb.27              | 88.26  | 0.373 | 162 |
| Sample_SPB47.mb.26cbin.1        | 93.21  | 4.956 | 103 |
| Sample_SPB47.mb.49              | 82.99  | 0.371 | 448 |
| Sample_SPB47.mb.88cbin.1        | 90.88  | 0.692 | 231 |
| Sample_SPB47.mb.93              | 100.00 | 2.884 | 33  |
| Sample_SPB47.mb.97cbin.1        | 81.26  | 0.849 | 44  |
| Sample_SPB47.mb.98              | 98.49  | 0.000 | 51  |
| Sample_SPB47.mb.84cbin.1        | 98.38  | 0.000 | 160 |
| Sample_SPB47.mb.61cbin.1        | 99.03  | 2.330 | 281 |

|                                 |        |       |     |
|---------------------------------|--------|-------|-----|
| Sample_SPC03.Cluster14085       | 92.69  | 3.370 | 13  |
| Sample_SPC03.Cluster3141cbin.1  | 97.84  | 0.097 | 58  |
| Sample_SPC03.Cluster11152       | 98.65  | 4.362 | 21  |
| Sample_SPC03.mb.117             | 93.95  | 0.806 | 45  |
| Sample_SPC03.Cluster257         | 84.89  | 1.342 | 84  |
| Sample_SPC03.Cluster9900        | 96.64  | 2.684 | 20  |
| Sample_SPC03.Cluster260cbin.1   | 85.87  | 1.845 | 248 |
| Sample_SPC03.Cluster7720        | 97.98  | 0.671 | 24  |
| Sample_SPC03.mb.24cbin.1        | 86.93  | 4.113 | 275 |
| Sample_SPC03.mb.49              | 96.52  | 0.000 | 13  |
| Sample_SPC03.mb.92cbin.1        | 82.30  | 2.678 | 255 |
| Sample_SPC03.mb.22cbin.1        | 89.45  | 3.496 | 326 |
| Sample_SPC03.Cluster10177       | 95.60  | 0.000 | 23  |
| Sample_SPC03.mb.48              | 82.39  | 3.635 | 89  |
| Sample_SPC03.Cluster5710cbin.1  | 91.61  | 0.671 | 59  |
| Sample_SPC03.mb.103             | 92.20  | 3.784 | 239 |
| Sample_SPC03.mb.104cbin.1       | 99.03  | 2.403 | 52  |
| Sample_SPC03.mb.6cbin.1         | 98.60  | 0.932 | 90  |
| Sample_SPC03.mb.106             | 97.83  | 0.000 | 47  |
| Sample_SPC03.Cluster8613cbin.1  | 98.63  | 0.000 | 40  |
| Sample_SPC03.mb.35cbin.1        | 95.95  | 3.068 | 235 |
| Sample_SPC03.mb.44              | 94.29  | 0.680 | 95  |
| Sample_SPC03.mb.113cbin.1       | 92.32  | 0.185 | 53  |
| Sample_SPC03.mb.97cbin.1        | 86.57  | 4.997 | 93  |
| Sample_SPC03.mb.57              | 95.97  | 0.671 | 67  |
| Sample_SPC03.mb.2cbin.1         | 98.30  | 2.001 | 67  |
| Sample_SPC03.mb.86cbin.1        | 98.99  | 0.000 | 47  |
| Sample_SPC03.mb.114             | 96.61  | 4.227 | 100 |
| Sample_SPC03.mb.12              | 93.66  | 3.190 | 175 |
| Sample_SPC03.mb.46              | 97.64  | 0.754 | 288 |
| Sample_SPC03.Cluster708         | 96.93  | 0.372 | 51  |
| Sample_SPC04.Cluster214cbin.1   | 92.78  | 0.671 | 80  |
| Sample_SPC04.Cluster376cbin.1   | 88.59  | 2.348 | 54  |
| Sample_SPC04.mb.6               | 98.38  | 1.612 | 41  |
| Sample_SPC04.Cluster1117cbin.1  | 91.94  | 3.020 | 41  |
| Sample_SPC04.mb.13              | 100.00 | 0.115 | 17  |
| Sample_SPC04.mb.76              | 90.66  | 1.333 | 27  |
| Sample_SPC04.mb.80              | 91.29  | 2.247 | 30  |
| Sample_SPC04.Cluster5731cbin.1  | 88.68  | 2.908 | 343 |
| Sample_SPC04.mb.54cbin.1        | 81.76  | 1.677 | 320 |
| Sample_SPC04.mb.34              | 81.73  | 1.686 | 253 |
| Sample_SPC04.mb.78cbin.1        | 93.26  | 1.342 | 28  |
| Sample_SPC04.Cluster5253        | 96.40  | 1.097 | 31  |
| Sample_SPC04.Cluster120cbin.1   | 81.76  | 1.074 | 269 |
| Sample_SPC04.Cluster907cbin.1   | 94.37  | 0.625 | 136 |
| Sample_SPC04.mb.15cbin.1        | 96.45  | 0.435 | 227 |
| Sample_SPC04.mb.29cbin.1        | 99.51  | 0.961 | 32  |
| Sample_SPC04.Cluster11760cbin.1 | 97.98  | 0.000 | 42  |
| Sample_SPC04.Cluster8782        | 99.32  | 0.335 | 18  |
| Sample_SPC04.mb.83cbin.1        | 98.60  | 2.913 | 116 |
| Sample_SPC04.mb.22cbin.1        | 91.69  | 1.250 | 175 |
| Sample_SPC04.mb.47              | 98.65  | 0.671 | 14  |
| Sample_SPC04.mb.59cbin.1        | 95.23  | 3.231 | 281 |
| Sample_SPC04.Cluster5803cbin.1  | 88.00  | 4.065 | 374 |
| Sample_SPC04.mb.85              | 85.65  | 1.906 | 91  |
| Sample_SPC04.Cluster3414cbin.1  | 95.47  | 1.242 | 300 |
| Sample_SPC04.mb.65cbin.1        | 82.74  | 1.972 | 336 |
| Sample_SPC04.mb.93              | 80.36  | 1.562 | 422 |

|                                |        |       |     |
|--------------------------------|--------|-------|-----|
| Sample_SPC04.mb.82cbin.1       | 87.87  | 1.952 | 16  |
| Sample_SPC04.mb.87             | 84.85  | 0.000 | 10  |
| Sample_SPC04.mb.81             | 97.76  | 3.848 | 190 |
| Sample_SPC04.mb.89             | 96.83  | 0.671 | 63  |
| Sample_SPC04.mb.62cbin.1       | 95.16  | 0.073 | 26  |
| Sample_SPC04.mb.69cbin.1       | 96.79  | 0.705 | 163 |
| Sample_SPC04.mb.88cbin.1       | 99.42  | 0.192 | 127 |
| Sample_SPC04.mb.92cbin.1       | 99.96  | 0.037 | 68  |
| Sample_SPC06.Cluster3248cbin.1 | 84.67  | 0.806 | 20  |
| Sample_SPC06.Cluster1387cbin.1 | 98.11  | 1.075 | 75  |
| Sample_SPC06.mb.44cbin.1       | 94.94  | 1.123 | 6   |
| Sample_SPC06.Cluster694        | 96.50  | 0.699 | 69  |
| Sample_SPC06.Cluster5415       | 97.98  | 0.000 | 19  |
| Sample_SPC06.Cluster328cbin.1  | 92.61  | 0.671 | 119 |
| Sample_SPC06.mb.48             | 92.28  | 1.342 | 62  |
| Sample_SPC06.Cluster1832cbin.1 | 94.63  | 1.342 | 12  |
| Sample_SPC06.mb.55             | 100.00 | 0.115 | 60  |
| Sample_SPC06.mb.71cbin.1       | 93.95  | 0.671 | 42  |
| Sample_SPC06.Cluster1121       | 88.54  | 0.671 | 25  |
| Sample_SPC06.Cluster5959cbin.1 | 97.98  | 1.677 | 31  |
| Sample_SPC06.mb.21cbin.1       | 91.38  | 0.632 | 325 |
| Sample_SPC06.mb.13             | 98.38  | 1.677 | 17  |
| Sample_SPC06.mb.8              | 96.15  | 1.048 | 55  |
| Sample_SPC06.mb.74             | 91.27  | 0.671 | 28  |
| Sample_SPC06.mb.78cbin.1       | 88.36  | 2.013 | 59  |
| Sample_SPC06.mb.35             | 90.40  | 2.684 | 230 |
| Sample_SPC06.Cluster1414       | 100.00 | 0.227 | 15  |
| Sample_SPC06.Cluster5280cbin.1 | 99.41  | 0.584 | 90  |
| Sample_SPC06.mb.86             | 86.35  | 0.000 | 71  |
| Sample_SPC06.mb.81             | 99.51  | 3.639 | 121 |
| Sample_SPC06.mb.72cbin.1       | 96.59  | 3.741 | 241 |
| Sample_SPC06.mb.59cbin.1       | 96.59  | 0.000 | 137 |
| Sample_SPC06.mb.65             | 95.30  | 0.671 | 91  |
| Sample_SPC06.mb.58cbin.1       | 93.66  | 3.196 | 272 |
| Sample_SPC06.mb.68cbin.1       | 99.51  | 0.240 | 85  |
| Sample_SPC06.mb.27             | 99.22  | 0.584 | 65  |
| Sample_SPC06.Cluster4605       | 99.19  | 0.192 | 34  |
| Sample_SPC06.Cluster1874cbin.1 | 93.91  | 1.185 | 483 |
| Sample_SPC06.mb.38             | 90.39  | 0.123 | 223 |
| Sample_SPC07.Cluster12284      | 82.45  | 0.000 | 138 |
| Sample_SPC07.mb.117cbin.1      | 94.73  | 4.784 | 19  |
| Sample_SPC07.Cluster12882      | 99.32  | 1.342 | 36  |
| Sample_SPC07.Cluster7505cbin.1 | 88.60  | 3.416 | 315 |
| Sample_SPC07.Cluster187cbin.1  | 91.94  | 1.342 | 25  |
| Sample_SPC07.Cluster5885cbin.1 | 98.94  | 0.632 | 86  |
| Sample_SPC07.Cluster8839cbin.1 | 85.97  | 4.291 | 552 |
| Sample_SPC07.Cluster82cbin.1   | 90.93  | 2.745 | 131 |
| Sample_SPC07.Cluster907        | 92.17  | 0.894 | 49  |
| Sample_SPC07.Cluster598cbin.1  | 91.03  | 3.544 | 105 |
| Sample_SPC07.Cluster923cbin.1  | 98.09  | 3.733 | 76  |
| Sample_SPC07.Cluster7094       | 99.40  | 0.598 | 17  |
| Sample_SPC07.Cluster4915cbin.1 | 97.46  | 0.021 | 84  |
| Sample_SPC07.mb.107            | 94.12  | 0.766 | 154 |
| Sample_SPC07.mb.12             | 80.53  | 0.000 | 157 |
| Sample_SPC07.Cluster3423       | 100.00 | 0.000 | 20  |
| Sample_SPC07.mb.4              | 92.41  | 4.494 | 14  |
| Sample_SPC07.Cluster120        | 98.84  | 1.075 | 50  |
| Sample_SPC07.Cluster2242       | 98.75  | 0.625 | 25  |

|                                 |        |       |     |
|---------------------------------|--------|-------|-----|
| Sample_SPC07.Cluster12260       | 99.47  | 0.000 | 13  |
| Sample_SPC07.mb.120             | 84.54  | 2.415 | 70  |
| Sample_SPC07.mb.32cbin.1        | 95.89  | 0.000 | 21  |
| Sample_SPC07.Cluster11122       | 97.98  | 0.000 | 40  |
| Sample_SPC07.mb.108             | 98.65  | 1.006 | 14  |
| Sample_SPC07.Cluster8152cbin.1  | 95.30  | 2.684 | 19  |
| Sample_SPC07.mb.18              | 93.88  | 0.000 | 116 |
| Sample_SPC07.mb.41              | 97.20  | 1.864 | 78  |
| Sample_SPC07.mb.118cbin.1       | 95.97  | 1.342 | 70  |
| Sample_SPC07.Cluster12891       | 99.36  | 0.632 | 62  |
| Sample_SPC07.mb.25              | 88.81  | 2.040 | 192 |
| Sample_SPC07.Cluster8463        | 98.86  | 0.000 | 24  |
| Sample_SPC07.mb.93              | 92.59  | 1.342 | 35  |
| Sample_SPC07.mb.30              | 97.27  | 0.961 | 36  |
| Sample_SPC07.Cluster5320cbin.1  | 97.31  | 0.000 | 112 |
| Sample_SPC07.mb.42              | 98.38  | 0.806 | 36  |
| Sample_SPC07.mb.82cbin.1        | 88.25  | 1.405 | 57  |
| Sample_SPC07.mb.85              | 82.88  | 0.000 | 45  |
| Sample_SPC07.mb.8               | 86.66  | 0.000 | 38  |
| Sample_SPC07.Cluster8650cbin.1  | 98.38  | 0.000 | 129 |
| Sample_SPC07.mb.23              | 97.07  | 0.000 | 74  |
| Sample_SPC07.mb.63              | 91.27  | 0.671 | 110 |
| Sample_SPC07.mb.88cbin.1        | 85.57  | 2.705 | 186 |
| Sample_SPC07.Cluster6991        | 99.61  | 0.961 | 84  |
| Sample_SPC07.mb.75              | 91.83  | 0.894 | 208 |
| Sample_SPC07.mb.47              | 94.13  | 4.591 | 115 |
| Sample_SPC07.mb.96              | 95.05  | 0.881 | 37  |
| Sample_SPC07.mb.78cbin.1        | 93.16  | 3.426 | 69  |
| Sample_SPC07.mb.71              | 91.72  | 0.309 | 100 |
| Sample_SPC07.mb.95              | 98.31  | 0.480 | 21  |
| Sample_SPC08.Cluster17317       | 81.46  | 4.494 | 21  |
| Sample_SPC08.Cluster17466       | 93.82  | 1.284 | 28  |
| Sample_SPC08.Cluster160cbin.1   | 91.59  | 0.671 | 45  |
| Sample_SPC08.Cluster3332cbin.1  | 98.38  | 0.364 | 60  |
| Sample_SPC08.Cluster1267        | 81.65  | 0.000 | 30  |
| Sample_SPC08.mb.118             | 91.57  | 1.685 | 14  |
| Sample_SPC08.Cluster351cbin.1   | 87.08  | 4.823 | 40  |
| Sample_SPC08.mb.10              | 95.80  | 1.165 | 100 |
| Sample_SPC08.Cluster5062cbin.1  | 95.63  | 0.000 | 18  |
| Sample_SPC08.Cluster315cbin.1   | 80.76  | 0.961 | 316 |
| Sample_SPC08.Cluster219cbin.1   | 93.47  | 1.496 | 192 |
| Sample_SPC08.Cluster14570cbin.1 | 97.31  | 0.671 | 62  |
| Sample_SPC08.Cluster4847cbin.1  | 96.64  | 4.697 | 17  |
| Sample_SPC08.mb.29              | 98.66  | 4.111 | 23  |
| Sample_SPC08.Cluster7170        | 99.40  | 0.598 | 11  |
| Sample_SPC08.mb.110             | 93.62  | 0.223 | 76  |
| Sample_SPC08.Cluster7553        | 100.00 | 0.480 | 11  |
| Sample_SPC08.Cluster15847       | 93.26  | 0.000 | 24  |
| Sample_SPC08.Cluster588cbin.1   | 95.50  | 1.250 | 151 |
| Sample_SPC08.Cluster6706cbin.1  | 99.98  | 1.497 | 20  |
| Sample_SPC08.mb.113             | 90.64  | 3.355 | 299 |
| Sample_SPC08.Cluster509         | 99.55  | 0.000 | 45  |
| Sample_SPC08.mb.11              | 97.74  | 2.028 | 47  |
| Sample_SPC08.mb.66              | 91.57  | 1.685 | 46  |
| Sample_SPC08.mb.54              | 89.93  | 1.333 | 59  |
| Sample_SPC08.Cluster9250        | 97.09  | 0.000 | 27  |
| Sample_SPC08.Cluster15302cbin.1 | 95.65  | 2.173 | 99  |
| Sample_SPC08.mb.26              | 89.93  | 4.697 | 46  |

|                                |       |       |     |
|--------------------------------|-------|-------|-----|
| Sample_SPC08.Cluster9757       | 99.32 | 0.335 | 26  |
| Sample_SPC08.mb.124            | 83.47 | 3.993 | 290 |
| Sample_SPC08.mb.127            | 84.21 | 2.834 | 269 |
| Sample_SPC08.Cluster9827cbin.1 | 98.64 | 0.675 | 85  |
| Sample_SPC08.mb.93             | 84.83 | 3.370 | 25  |
| Sample_SPC08.Cluster5156cbin.1 | 80.20 | 2.153 | 157 |
| Sample_SPC08.mb.56             | 80.48 | 0.838 | 305 |
| Sample_SPC08.mb.91             | 98.38 | 0.806 | 44  |
| Sample_SPC08.mb.58             | 89.20 | 0.671 | 218 |
| Sample_SPC08.mb.49             | 93.91 | 0.675 | 36  |
| Sample_SPC08.mb.18cbin.1       | 94.83 | 1.442 | 71  |
| Sample_SPC08.mb.79             | 84.55 | 0.000 | 259 |
| Sample_SPC08.Cluster7435cbin.1 | 96.21 | 1.124 | 343 |
| Sample_SPC08.mb.4              | 91.15 | 2.013 | 245 |
| Sample_SPC08.mb.76             | 89.31 | 4.026 | 81  |
| Sample_SPC08.mb.51             | 97.59 | 3.044 | 51  |
| Sample_SPC08.mb.55             | 97.58 | 0.806 | 127 |
| Sample_SPC08.Cluster7176cbin.1 | 95.03 | 2.323 | 56  |
| Sample_SPC08.mb.61             | 93.95 | 1.169 | 196 |
| Sample_SPC08.mb.9              | 97.34 | 1.932 | 49  |
| Sample_SPC08.mb.41             | 96.36 | 3.343 | 386 |
| Sample_SPC09.Cluster31cbin.1   | 86.55 | 3.691 | 223 |
| Sample_SPC09.Cluster1936cbin.1 | 99.32 | 0.671 | 76  |
| Sample_SPC09.Cluster90         | 86.04 | 0.671 | 49  |
| Sample_SPC09.Cluster8082cbin.1 | 98.16 | 3.639 | 62  |
| Sample_SPC09.Cluster2849cbin.1 | 96.83 | 0.021 | 90  |
| Sample_SPC09.mb.12             | 94.72 | 0.000 | 167 |
| Sample_SPC09.mb.33             | 96.81 | 1.598 | 57  |
| Sample_SPC09.mb.16             | 86.05 | 0.680 | 64  |
| Sample_SPC09.Cluster5456       | 99.98 | 1.696 | 18  |
| Sample_SPC09.mb.29             | 99.32 | 0.671 | 18  |
| Sample_SPC09.mb.69             | 83.54 | 2.215 | 414 |
| Sample_SPC09.mb.67cbin.1       | 95.97 | 0.335 | 55  |
| Sample_SPC09.Cluster2177cbin.1 | 87.91 | 1.424 | 354 |
| Sample_SPC09.Cluster5059cbin.1 | 97.69 | 4.960 | 66  |
| Sample_SPC09.mb.21             | 99.32 | 0.671 | 18  |
| Sample_SPC09.Cluster6794cbin.1 | 93.95 | 1.342 | 221 |
| Sample_SPC09.Cluster6170       | 98.06 | 0.000 | 59  |
| Sample_SPC09.Cluster6340cbin.1 | 98.49 | 0.000 | 17  |
| Sample_SPC09.mb.87cbin.1       | 95.67 | 2.403 | 38  |
| Sample_SPC09.Cluster5921cbin.1 | 92.98 | 0.501 | 277 |
| Sample_SPC09.mb.82             | 95.16 | 0.959 | 55  |
| Sample_SPC09.Cluster4566cbin.1 | 98.52 | 0.669 | 29  |
| Sample_SPC09.mb.83             | 98.10 | 0.650 | 40  |
| Sample_SPC09.mb.73cbin.1       | 99.23 | 3.846 | 214 |
| Sample_SPC10.Cluster2969       | 91.25 | 0.671 | 40  |
| Sample_SPC10.mb.10             | 80.53 | 0.489 | 16  |
| Sample_SPC10.Cluster27         | 90.60 | 0.000 | 11  |
| Sample_SPC10.Cluster2394cbin.1 | 97.33 | 0.632 | 99  |
| Sample_SPC10.Cluster1785       | 94.75 | 1.902 | 103 |
| Sample_SPC10.mb.20             | 89.22 | 0.421 | 211 |
| Sample_SPC10.mb.26             | 93.03 | 0.632 | 56  |
| Sample_SPC10.Cluster4267cbin.1 | 97.98 | 0.335 | 35  |
| Sample_SPC10.mb.11             | 88.25 | 4.910 | 162 |
| Sample_SPC10.Cluster5577cbin.1 | 90.57 | 0.000 | 32  |
| Sample_SPC10.mb.23cbin.1       | 96.87 | 0.000 | 13  |
| Sample_SPC10.mb.12cbin.1       | 94.63 | 0.134 | 143 |
| Sample_SPC10.mb.49cbin.1       | 91.44 | 0.680 | 69  |

|                                 |       |       |     |
|---------------------------------|-------|-------|-----|
| Sample_SPC10.Cluster4683cbin.1  | 99.51 | 2.415 | 75  |
| Sample_SPC10.mb.46cbin.1        | 94.49 | 0.850 | 91  |
| Sample_SPC10.mb.73              | 92.40 | 4.761 | 66  |
| Sample_SPC10.mb.2               | 90.25 | 4.225 | 398 |
| Sample_SPC10.mb.34              | 93.46 | 3.216 | 205 |
| Sample_SPC10.mb.59cbin.1        | 91.71 | 0.140 | 187 |
| Sample_SPC10.Cluster2004cbin.1  | 96.75 | 1.115 | 40  |
| Sample_SPC10.mb.37              | 96.83 | 1.028 | 152 |
| Sample_SPC10.mb.29cbin.1        | 89.52 | 0.495 | 50  |
| Sample_SPC10.mb.1cbin.1         | 96.47 | 0.750 | 311 |
| Sample_SPC10.Cluster3694cbin.1  | 90.35 | 2.535 | 219 |
| Sample_SPC10.mb.62cbin.1        | 98.37 | 0.187 | 44  |
| Sample_SPC10.Cluster140         | 98.80 | 0.334 | 34  |
| Sample_SPC11.Cluster4048        | 95.96 | 0.000 | 17  |
| Sample_SPC11.Cluster2715cbin.1  | 84.94 | 1.006 | 187 |
| Sample_SPC11.Cluster288         | 84.89 | 1.342 | 28  |
| Sample_SPC11.Cluster5831        | 98.48 | 0.000 | 33  |
| Sample_SPC11.Cluster4863        | 99.19 | 0.115 | 13  |
| Sample_SPC11.Cluster134cbin.1   | 90.80 | 1.775 | 251 |
| Sample_SPC11.Cluster10732cbin.1 | 97.30 | 0.134 | 114 |
| Sample_SPC11.Cluster160         | 97.04 | 2.419 | 35  |
| Sample_SPC11.Cluster294cbin.1   | 85.10 | 1.360 | 161 |
| Sample_SPC11.Cluster4327cbin.1  | 99.40 | 1.497 | 43  |
| Sample_SPC11.Cluster1525cbin.1  | 89.83 | 1.342 | 218 |
| Sample_SPC11.Cluster6659cbin.1  | 82.29 | 3.704 | 403 |
| Sample_SPC11.Cluster2946        | 97.27 | 4.026 | 16  |
| Sample_SPC11.Cluster83cbin.1    | 96.30 | 1.342 | 58  |
| Sample_SPC11.mb.104             | 91.11 | 1.733 | 277 |
| Sample_SPC11.Cluster1285        | 98.75 | 0.625 | 24  |
| Sample_SPC11.Cluster1447cbin.1  | 97.11 | 0.176 | 60  |
| Sample_SPC11.mb.119             | 95.78 | 2.531 | 121 |
| Sample_SPC11.mb.133cbin.1       | 92.31 | 2.684 | 78  |
| Sample_SPC11.Cluster8333        | 98.65 | 1.006 | 18  |
| Sample_SPC11.Cluster6575        | 96.07 | 1.570 | 39  |
| Sample_SPC11.Cluster10755cbin.1 | 98.51 | 0.671 | 86  |
| Sample_SPC11.mb.53              | 92.41 | 1.685 | 23  |
| Sample_SPC11.Cluster6755cbin.1  | 95.20 | 0.000 | 24  |
| Sample_SPC11.Cluster10067cbin.1 | 98.53 | 2.348 | 54  |
| Sample_SPC11.mb.105             | 85.89 | 2.005 | 120 |
| Sample_SPC11.mb.41              | 91.90 | 1.342 | 178 |
| Sample_SPC11.mb.116cbin.1       | 99.33 | 0.000 | 34  |
| Sample_SPC11.Cluster6184        | 98.86 | 0.000 | 17  |
| Sample_SPC11.mb.40cbin.1        | 87.33 | 0.543 | 207 |
| Sample_SPC11.mb.10              | 97.22 | 0.483 | 55  |
| Sample_SPC11.mb.114             | 98.65 | 0.000 | 21  |
| Sample_SPC11.mb.24              | 93.26 | 0.961 | 30  |
| Sample_SPC11.mb.76              | 88.88 | 0.854 | 26  |
| Sample_SPC11.Cluster2437cbin.1  | 89.96 | 4.270 | 211 |
| Sample_SPC11.mb.136             | 97.91 | 0.949 | 130 |
| Sample_SPC11.mb.2               | 98.63 | 0.909 | 26  |
| Sample_SPC11.mb.51              | 99.32 | 3.355 | 204 |
| Sample_SPC11.mb.46              | 89.55 | 2.294 | 192 |
| Sample_SPC11.mb.64              | 96.42 | 0.000 | 69  |
| Sample_SPC11.mb.3cbin.1         | 89.83 | 0.680 | 241 |
| Sample_SPC11.Cluster4045cbin.1  | 98.84 | 1.153 | 78  |
| Sample_SPC11.mb.75              | 94.84 | 2.013 | 202 |
| Sample_SPC11.mb.70cbin.1        | 91.94 | 0.000 | 36  |
| Sample_SPC11.mb.82cbin.1        | 89.85 | 1.342 | 107 |



|                                 |        |       |     |
|---------------------------------|--------|-------|-----|
| Sample_SPC11.mb.47              | 98.55  | 0.480 | 43  |
| Sample_SPC11.mb.56              | 82.70  | 1.415 | 434 |
| Sample_SPC11.mb.110             | 89.38  | 2.518 | 154 |
| Sample_SPC11.mb.6               | 100.00 | 0.000 | 30  |
| Sample_SPC11.mb.44              | 95.13  | 4.291 | 158 |
| Sample_SPC11.mb.66              | 95.30  | 1.006 | 93  |
| Sample_SPC11.mb.95cbin.1        | 89.97  | 0.961 | 219 |
| Sample_SPC11.mb.37cbin.1        | 93.83  | 0.173 | 414 |
| Sample_SPC11.mb.99              | 90.54  | 0.373 | 62  |
| Sample_SPC11.mb.73cbin.1        | 96.22  | 1.119 | 90  |
| Sample_SPC11.mb.86cbin.1        | 96.60  | 4.213 | 82  |
| Sample_SPC11.mb.94              | 97.31  | 0.000 | 164 |
| Sample_SPC12.mb.1               | 85.34  | 3.571 | 114 |
| Sample_SPC12.Cluster15328cbin.1 | 82.88  | 4.870 | 440 |
| Sample_SPC12.Cluster5908cbin.1  | 96.48  | 1.282 | 173 |
| Sample_SPC12.Cluster17469       | 86.23  | 1.600 | 242 |
| Sample_SPC12.mb.103             | 87.92  | 2.247 | 27  |
| Sample_SPC12.Cluster480         | 86.48  | 2.364 | 55  |
| Sample_SPC12.mb.126             | 97.58  | 0.806 | 44  |
| Sample_SPC12.Cluster2893cbin.1  | 96.63  | 0.000 | 23  |
| Sample_SPC12.Cluster6801cbin.1  | 95.97  | 0.000 | 29  |
| Sample_SPC12.Cluster13456       | 99.32  | 0.335 | 25  |
| Sample_SPC12.Cluster2319        | 89.38  | 1.342 | 21  |
| Sample_SPC12.Cluster14444cbin.1 | 97.31  | 1.677 | 49  |
| Sample_SPC12.Cluster13847cbin.1 | 85.62  | 4.362 | 299 |
| Sample_SPC12.Cluster11106cbin.1 | 91.02  | 3.490 | 312 |
| Sample_SPC12.mb.36              | 91.57  | 0.160 | 32  |
| Sample_SPC12.mb.138             | 81.89  | 3.691 | 359 |
| Sample_SPC12.mb.131             | 82.55  | 0.671 | 391 |
| Sample_SPC12.mb.107             | 94.67  | 0.680 | 240 |
| Sample_SPC12.mb.117cbin.1       | 80.20  | 0.000 | 18  |
| Sample_SPC12.Cluster12531cbin.1 | 92.98  | 2.046 | 77  |
| Sample_SPC12.mb.32              | 98.65  | 0.000 | 14  |
| Sample_SPC12.mb.114             | 99.29  | 0.480 | 165 |
| Sample_SPC12.mb.122cbin.1       | 100.00 | 0.000 | 19  |
| Sample_SPC12.mb.113cbin.1       | 93.27  | 0.584 | 108 |
| Sample_SPC12.mb.43              | 97.71  | 0.020 | 168 |
| Sample_SPC12.mb.82cbin.1        | 90.66  | 4.111 | 49  |
| Sample_SPC12.mb.133cbin.1       | 97.57  | 1.409 | 111 |
| Sample_SPC12.mb.20              | 96.15  | 0.961 | 33  |
| Sample_SPC12.mb.56cbin.1        | 97.17  | 1.568 | 116 |
| Sample_SPC12.mb.73              | 98.60  | 1.864 | 122 |
| Sample_SPC12.mb.132             | 94.79  | 2.323 | 160 |
| Sample_SPC12.mb.22              | 94.63  | 1.342 | 71  |
| Sample_SPC12.mb.86              | 82.55  | 2.348 | 72  |
| Sample_SPC12.mb.61              | 98.29  | 0.632 | 103 |
| Sample_SPC12.mb.8               | 99.10  | 3.355 | 76  |
| Sample_SPC12.Cluster9084cbin.1  | 91.74  | 0.769 | 527 |
| Sample_SPC12.mb.72cbin.1        | 92.03  | 2.092 | 225 |
| Sample_SPC12.mb.53              | 90.31  | 0.769 | 70  |
| Sample_SPC12.mb.81              | 97.70  | 1.201 | 83  |
| Sample_SPC12.mb.137             | 90.96  | 1.672 | 236 |
| Sample_SPC12.mb.23              | 97.58  | 2.850 | 147 |
| Sample_SPC12.mb.60cbin.1        | 97.78  | 3.711 | 115 |
| Sample_SPC12.mb.54              | 93.58  | 0.800 | 29  |
| Sample_SPC12.mb.4cbin.1         | 88.32  | 0.466 | 49  |
| Sample_SPC12.mb.91cbin.1        | 99.46  | 1.075 | 231 |
| Sample_SPC13.Cluster1460cbin.1  | 97.17  | 0.806 | 143 |

|                                |        |       |     |
|--------------------------------|--------|-------|-----|
| Sample_SPC13.Cluster7173       | 82.37  | 0.671 | 275 |
| Sample_SPC13.Cluster8354       | 94.63  | 0.894 | 70  |
| Sample_SPC13.Cluster7899cbin.1 | 98.65  | 0.335 | 15  |
| Sample_SPC13.Cluster37cbin.1   | 82.98  | 0.680 | 433 |
| Sample_SPC13.Cluster265cbin.1  | 96.44  | 0.000 | 30  |
| Sample_SPC13.Cluster3818cbin.1 | 99.98  | 1.497 | 23  |
| Sample_SPC13.mb.37cbin.1       | 85.90  | 0.134 | 39  |
| Sample_SPC13.Cluster6624       | 99.32  | 1.006 | 18  |
| Sample_SPC13.Cluster4518cbin.1 | 97.98  | 0.000 | 34  |
| Sample_SPC13.Cluster1373       | 98.75  | 0.625 | 33  |
| Sample_SPC13.mb.3              | 97.59  | 0.000 | 25  |
| Sample_SPC13.mb.103            | 98.40  | 0.000 | 132 |
| Sample_SPC13.mb.14cbin.1       | 89.97  | 0.076 | 15  |
| Sample_SPC13.mb.47             | 91.27  | 1.342 | 35  |
| Sample_SPC13.Cluster5690cbin.1 | 99.51  | 0.483 | 99  |
| Sample_SPC13.mb.29             | 97.71  | 1.121 | 59  |
| Sample_SPC13.mb.52cbin.1       | 92.61  | 1.891 | 76  |
| Sample_SPC13.mb.43             | 95.96  | 1.612 | 123 |
| Sample_SPC13.mb.55             | 97.65  | 0.713 | 93  |
| Sample_SPC13.mb.49             | 97.98  | 0.671 | 141 |
| Sample_SPC13.mb.88             | 80.15  | 1.008 | 312 |
| Sample_SPC13.Cluster8560cbin.1 | 100.00 | 0.632 | 68  |
| Sample_SPC13.mb.59             | 96.75  | 1.898 | 132 |
| Sample_SPC13.mb.72             | 97.98  | 0.384 | 114 |
| Sample_SPC13.mb.24cbin.1       | 95.01  | 0.480 | 48  |
| Sample_SPC13.mb.20             | 92.98  | 0.000 | 48  |
| Sample_SPC13.mb.15             | 99.62  | 0.000 | 16  |
| Sample_SPC13.Cluster3275cbin.1 | 92.80  | 3.965 | 50  |
| Sample_SPC13.mb.57             | 97.11  | 0.000 | 41  |
| Sample_SPC13.mb.9              | 97.57  | 2.393 | 204 |
| Sample_SPC13.mb.53             | 99.21  | 1.759 | 57  |
| Sample_SPC13.Cluster5341cbin.1 | 99.61  | 0.512 | 87  |
| Sample_SPC13.mb.48cbin.1       | 93.43  | 2.210 | 79  |
| Sample_SPC13.Cluster3765cbin.1 | 96.72  | 0.743 | 107 |
| Sample_SPC13.mb.79             | 95.11  | 0.961 | 36  |
| Sample_SPC13.mb.66cbin.1       | 82.15  | 0.632 | 353 |
| Sample_SPC13.mb.83             | 97.31  | 0.335 | 44  |
| Sample_SPC13.Cluster2319cbin.1 | 99.42  | 2.051 | 136 |
| Sample_SPC13.mb.76             | 98.65  | 0.167 | 72  |
| Sample_SPC13.mb.8              | 97.22  | 0.000 | 266 |
| Sample_SPC13.mb.56             | 91.62  | 0.746 | 89  |
| Sample_SPC13.mb.54             | 99.40  | 0.000 | 27  |
| Sample_SPC13.mb.77             | 97.46  | 0.652 | 209 |
| Sample_SPC13.mb.84             | 94.20  | 0.185 | 92  |
| Sample_SPC13.Cluster411        | 98.56  | 0.533 | 31  |
| Sample_SPC13.mb.70cbin.1       | 95.71  | 4.146 | 152 |
| Sample_SPC15.mb.26cbin.1       | 92.13  | 0.806 | 73  |
| Sample_SPC15.Cluster10481      | 99.32  | 1.118 | 18  |
| Sample_SPC15.Cluster5266       | 93.29  | 0.894 | 223 |
| Sample_SPC15.Cluster5521cbin.1 | 90.84  | 0.000 | 23  |
| Sample_SPC15.mb.22             | 93.95  | 0.671 | 52  |
| Sample_SPC15.Cluster4826cbin.1 | 91.72  | 2.624 | 179 |
| Sample_SPC15.Cluster2952       | 96.22  | 0.898 | 55  |
| Sample_SPC15.Cluster6cbin.1    | 88.50  | 2.173 | 290 |
| Sample_SPC15.Cluster5604cbin.1 | 85.91  | 0.732 | 259 |
| Sample_SPC15.mb.51             | 90.92  | 0.000 | 120 |
| Sample_SPC15.Cluster1367       | 98.63  | 0.000 | 54  |
| Sample_SPC15.Cluster11881      | 90.57  | 0.261 | 30  |

|                                |       |       |     |
|--------------------------------|-------|-------|-----|
| Sample_SPC15.mb.31             | 92.30 | 0.657 | 251 |
| Sample_SPC15.mb.30             | 95.41 | 2.028 | 129 |
| Sample_SPC15.mb.66             | 80.70 | 0.000 | 61  |
| Sample_SPC15.mb.17             | 99.36 | 1.896 | 113 |
| Sample_SPC15.mb.59             | 84.56 | 0.000 | 49  |
| Sample_SPC15.mb.40             | 85.92 | 2.323 | 305 |
| Sample_SPC15.mb.72cbin.1       | 91.94 | 1.342 | 25  |
| Sample_SPC15.mb.55             | 83.20 | 0.754 | 34  |
| Sample_SPC15.mb.80cbin.1       | 94.14 | 0.740 | 86  |
| Sample_SPC15.mb.48             | 97.97 | 0.284 | 156 |
| Sample_SPC15.mb.83             | 92.57 | 0.671 | 55  |
| Sample_SPC15.mb.25cbin.1       | 95.12 | 0.701 | 118 |
| Sample_SPC15.Cluster2024cbin.1 | 99.07 | 0.361 | 51  |
| Sample_SPC16.mb.2              | 86.20 | 4.026 | 395 |
| Sample_SPC16.Cluster4036cbin.1 | 96.41 | 1.265 | 148 |
| Sample_SPC16.mb.29cbin.1       | 82.38 | 3.243 | 253 |
| Sample_SPC16.Cluster8896       | 94.47 | 0.707 | 64  |
| Sample_SPC16.Cluster3365       | 99.98 | 0.898 | 31  |
| Sample_SPC16.Cluster799cbin.1  | 98.12 | 0.000 | 104 |
| Sample_SPC16.mb.25cbin.1       | 95.40 | 2.560 | 216 |
| Sample_SPC16.Cluster10140      | 99.47 | 0.000 | 24  |
| Sample_SPC16.mb.37             | 95.53 | 2.589 | 157 |
| Sample_SPC16.Cluster7549cbin.1 | 95.97 | 0.671 | 40  |
| Sample_SPC16.Cluster5477cbin.1 | 82.09 | 1.326 | 127 |
| Sample_SPC16.mb.27cbin.1       | 97.58 | 4.589 | 57  |
| Sample_SPC16.Cluster7014cbin.1 | 96.77 | 1.751 | 125 |
| Sample_SPC16.mb.71             | 96.01 | 0.000 | 51  |
| Sample_SPC16.Cluster3708       | 98.07 | 0.000 | 52  |
| Sample_SPC16.mb.62             | 87.98 | 2.761 | 72  |
| Sample_SPC17.mb.37             | 97.98 | 0.000 | 30  |
| Sample_SPC17.Cluster1353       | 96.46 | 0.000 | 57  |
| Sample_SPC17.Cluster1055       | 99.36 | 0.000 | 33  |
| Sample_SPC17.Cluster306cbin.1  | 97.31 | 0.356 | 151 |
| Sample_SPC17.mb.41             | 99.03 | 0.961 | 36  |
| Sample_SPC17.Cluster1142cbin.1 | 98.96 | 2.095 | 86  |
| Sample_SPC17.Cluster2779cbin.1 | 92.95 | 1.342 | 360 |
| Sample_SPC17.mb.60             | 95.27 | 0.717 | 82  |
| Sample_SPC17.mb.1cbin.1        | 95.32 | 0.097 | 35  |
| Sample_SPC17.Cluster1240       | 94.35 | 1.154 | 152 |
| Sample_SPC17.Cluster3452cbin.1 | 97.77 | 1.868 | 216 |
| Sample_SPC17.mb.28cbin.1       | 89.64 | 2.933 | 142 |
| Sample_SPC17.Cluster48cbin.1   | 86.31 | 0.322 | 103 |
| Sample_SPC17.mb.64cbin.1       | 91.72 | 0.944 | 109 |
| Sample_SPC17.Cluster66cbin.1   | 97.98 | 3.231 | 87  |
| Sample_SPC17.mb.51cbin.1       | 92.11 | 0.805 | 179 |
| Sample_SPC17.mb.43cbin.1       | 82.27 | 0.738 | 155 |
| Sample_SPC17.mb.74cbin.1       | 93.28 | 0.680 | 67  |
| Sample_SPC17.Cluster2305       | 89.57 | 4.744 | 116 |
| Sample_SPC17.Cluster887cbin.1  | 93.32 | 0.371 | 255 |
| Sample_SPC17.Cluster2479cbin.1 | 92.39 | 1.169 | 67  |
| Sample_SPC17.Cluster2998cbin.1 | 98.83 | 2.923 | 102 |
| Sample_SPC17.mb.2cbin.1        | 93.21 | 0.941 | 51  |
| Sample_SPC17.mb.45cbin.1       | 91.11 | 1.153 | 458 |
| Sample_SPC17.Cluster1300cbin.1 | 99.61 | 0.897 | 56  |
| Sample_SPC17.Cluster1839cbin.1 | 89.00 | 1.127 | 75  |
| Sample_SPC17.mb.73cbin.1       | 99.37 | 0.037 | 64  |
| Sample_SPC20.Cluster11157      | 85.91 | 1.123 | 265 |
| Sample_SPC20.Cluster6091cbin.1 | 92.74 | 2.419 | 64  |

|                                 |        |       |     |
|---------------------------------|--------|-------|-----|
| Sample_SPC20.mb.26cbin.1        | 90.66  | 1.333 | 66  |
| Sample_SPC20.mb.23              | 93.54  | 0.000 | 101 |
| Sample_SPC20.Cluster8391cbin.1  | 98.99  | 1.677 | 200 |
| Sample_SPC20.mb.90              | 81.03  | 0.000 | 117 |
| Sample_SPC20.Cluster2624cbin.1  | 93.28  | 0.000 | 37  |
| Sample_SPC20.mb.93              | 93.26  | 1.342 | 29  |
| Sample_SPC20.Cluster6543        | 97.09  | 0.000 | 24  |
| Sample_SPC20.mb.82              | 91.18  | 2.742 | 200 |
| Sample_SPC20.mb.24cbin.1        | 89.93  | 1.006 | 10  |
| Sample_SPC20.Cluster8953cbin.1  | 99.32  | 1.342 | 37  |
| Sample_SPC20.mb.41              | 93.07  | 2.512 | 109 |
| Sample_SPC20.mb.60cbin.1        | 96.28  | 3.044 | 166 |
| Sample_SPC20.Cluster7734        | 81.52  | 4.106 | 28  |
| Sample_SPC20.Cluster7449cbin.1  | 94.60  | 0.483 | 90  |
| Sample_SPC20.Cluster4172cbin.1  | 93.67  | 0.738 | 131 |
| Sample_SPC20.mb.94              | 95.65  | 2.531 | 159 |
| Sample_SPC20.mb.3               | 96.31  | 1.228 | 77  |
| Sample_SPC20.mb.20              | 98.50  | 1.482 | 52  |
| Sample_SPC20.mb.66              | 97.29  | 1.342 | 67  |
| Sample_SPC20.mb.59              | 93.91  | 0.671 | 50  |
| Sample_SPC20.mb.69              | 84.50  | 3.653 | 85  |
| Sample_SPC20.mb.18              | 99.24  | 0.377 | 26  |
| Sample_SPC20.mb.30              | 93.94  | 2.230 | 75  |
| Sample_SPC20.mb.61              | 90.93  | 1.461 | 126 |
| Sample_SPC20.Cluster9809cbin.1  | 88.12  | 1.794 | 555 |
| Sample_SPC20.mb.65              | 89.13  | 1.127 | 160 |
| Sample_SPC21.mb.16cbin.1        | 80.34  | 0.000 | 62  |
| Sample_SPC21.Cluster3681        | 97.84  | 1.173 | 42  |
| Sample_SPC21.Cluster5073        | 91.25  | 1.342 | 21  |
| Sample_SPC21.mb.30              | 87.80  | 1.510 | 124 |
| Sample_SPC21.mb.29              | 93.47  | 1.118 | 140 |
| Sample_SPC21.mb.23cbin.1        | 94.96  | 2.502 | 93  |
| Sample_SPC21.mb.39              | 95.74  | 0.671 | 80  |
| Sample_SPC21.mb.10              | 92.41  | 1.053 | 59  |
| Sample_SPC21.mb.35              | 92.15  | 0.000 | 223 |
| Sample_SPC21.mb.33cbin.1        | 92.40  | 1.476 | 160 |
| Sample_SPC21.mb.73cbin.1        | 88.88  | 0.284 | 42  |
| Sample_SPC21.mb.24cbin.1        | 98.65  | 1.677 | 47  |
| Sample_SPC21.mb.84cbin.1        | 98.43  | 0.000 | 75  |
| Sample_SPC21.mb.6               | 93.84  | 0.134 | 179 |
| Sample_SPC21.mb.88              | 96.50  | 1.165 | 74  |
| Sample_SPC21.mb.77              | 94.63  | 0.335 | 38  |
| Sample_SPC21.Cluster9797cbin.1  | 99.32  | 1.006 | 28  |
| Sample_SPC21.Cluster11874cbin.1 | 93.95  | 0.020 | 52  |
| Sample_SPC21.mb.18              | 98.65  | 0.671 | 23  |
| Sample_SPC21.mb.78cbin.1        | 98.32  | 0.000 | 106 |
| Sample_SPC21.mb.62              | 92.63  | 1.360 | 227 |
| Sample_SPC21.mb.70cbin.1        | 92.46  | 0.961 | 23  |
| Sample_SPC21.mb.45cbin.1        | 93.56  | 1.559 | 98  |
| Sample_SPC21.mb.8cbin.1         | 89.59  | 2.348 | 172 |
| Sample_SPC21.Cluster7727        | 96.60  | 0.000 | 27  |
| Sample_SPC21.mb.72              | 95.30  | 0.000 | 20  |
| Sample_SPC21.Cluster4981cbin.1  | 89.62  | 2.674 | 69  |
| Sample_SPC21.mb.91              | 100.00 | 0.480 | 41  |
| Sample_SPC21.Cluster6746        | 98.38  | 1.075 | 108 |
| Sample_SPC21.mb.87cbin.1        | 99.03  | 0.000 | 45  |
| Sample_SPC21.Cluster7572cbin.1  | 97.91  | 0.185 | 76  |
| Sample_SPC21.mb.60              | 90.79  | 2.817 | 174 |

|                                 |        |       |     |
|---------------------------------|--------|-------|-----|
| Sample_SPC21.mb.93              | 90.86  | 0.826 | 412 |
| Sample_SPC21.Cluster6987cbin.1  | 89.94  | 2.948 | 290 |
| Sample_SPC21.Cluster6056        | 97.88  | 0.576 | 70  |
| Sample_SPC21.mb.98              | 95.20  | 0.806 | 122 |
| Sample_SPC21.mb.1               | 90.44  | 0.836 | 60  |
| Sample_SPC22.Cluster17904       | 91.57  | 2.247 | 12  |
| Sample_SPC22.Cluster7620cbin.1  | 96.55  | 1.880 | 30  |
| Sample_SPC22.Cluster16607       | 89.03  | 0.000 | 19  |
| Sample_SPC22.Cluster7396        | 97.84  | 0.000 | 39  |
| Sample_SPC22.mb.117             | 80.33  | 0.000 | 9   |
| Sample_SPC22.Cluster481         | 100.00 | 1.411 | 52  |
| Sample_SPC22.Cluster8892cbin.1  | 92.26  | 1.342 | 26  |
| Sample_SPC22.Cluster110cbin.1   | 88.32  | 2.969 | 123 |
| Sample_SPC22.Cluster184         | 98.32  | 0.671 | 45  |
| Sample_SPC22.mb.107             | 100.00 | 0.115 | 13  |
| Sample_SPC22.mb.21              | 85.51  | 0.862 | 54  |
| Sample_SPC22.Cluster9571cbin.1  | 89.45  | 0.632 | 38  |
| Sample_SPC22.mb.41              | 85.67  | 1.123 | 26  |
| Sample_SPC22.Cluster15262       | 82.94  | 0.894 | 338 |
| Sample_SPC22.mb.12              | 99.01  | 0.838 | 64  |
| Sample_SPC22.Cluster17294       | 98.95  | 0.000 | 24  |
| Sample_SPC22.Cluster17647cbin.1 | 95.42  | 1.408 | 214 |
| Sample_SPC22.Cluster1719cbin.1  | 97.95  | 0.680 | 35  |
| Sample_SPC22.mb.140cbin.1       | 95.41  | 1.342 | 59  |
| Sample_SPC22.mb.130cbin.1       | 89.07  | 0.000 | 232 |
| Sample_SPC22.mb.33              | 98.60  | 1.668 | 89  |
| Sample_SPC22.mb.103             | 98.65  | 2.348 | 156 |
| Sample_SPC22.mb.31              | 94.29  | 0.671 | 105 |
| Sample_SPC22.mb.113             | 98.68  | 1.843 | 50  |
| Sample_SPC22.Cluster1939cbin.1  | 96.81  | 1.477 | 36  |
| Sample_SPC22.Cluster14493cbin.1 | 97.48  | 3.836 | 299 |
| Sample_SPC22.mb.46              | 83.98  | 4.884 | 199 |
| Sample_SPC22.mb.78              | 98.38  | 0.000 | 58  |
| Sample_SPC22.mb.143cbin.1       | 93.95  | 1.342 | 32  |
| Sample_SPC22.mb.16              | 99.10  | 0.671 | 24  |
| Sample_SPC22.mb.62              | 89.64  | 1.489 | 283 |
| Sample_SPC22.mb.38              | 96.63  | 0.000 | 55  |
| Sample_SPC22.mb.60cbin.1        | 83.90  | 4.255 | 352 |
| Sample_SPC22.mb.65cbin.1        | 99.32  | 2.348 | 140 |
| Sample_SPC22.Cluster7098cbin.1  | 97.99  | 1.760 | 184 |
| Sample_SPC22.mb.126             | 99.24  | 0.217 | 42  |
| Sample_SPC22.mb.54              | 98.07  | 4.326 | 45  |
| Sample_SPC22.mb.39cbin.1        | 88.25  | 0.887 | 513 |
| Sample_SPC22.mb.30              | 85.81  | 0.480 | 24  |
| Sample_SPC22.mb.98              | 87.52  | 1.398 | 62  |
| Sample_SPC22.mb.43              | 96.96  | 4.310 | 289 |
| Sample_SPC22.mb.66              | 90.26  | 2.782 | 208 |
| Sample_SPC22.mb.127             | 94.95  | 4.384 | 105 |
| Sample_SPC22.mb.125cbin.1       | 96.04  | 0.898 | 148 |
| Sample_SPC22.mb.45cbin.1        | 94.17  | 3.333 | 353 |
| Sample_SPC22.mb.86cbin.1        | 99.62  | 0.000 | 36  |
| Sample_SPC22.mb.68cbin.1        | 95.76  | 1.486 | 150 |
| Sample_SPC22.mb.81              | 90.22  | 0.563 | 119 |
| Sample_SPC22.mb.87cbin.1        | 99.28  | 3.841 | 80  |
| Sample_SPC25.Cluster24cbin.1    | 91.44  | 1.510 | 163 |
| Sample_SPC25.Cluster19206cbin.1 | 99.05  | 0.943 | 117 |
| Sample_SPC25.mb.5               | 80.17  | 0.000 | 117 |
| Sample_SPC25.Cluster5384cbin.1  | 97.31  | 0.671 | 31  |

|                                 |       |       |     |
|---------------------------------|-------|-------|-----|
| Sample_SPC25.Cluster3917        | 90.80 | 0.000 | 74  |
| Sample_SPC25.mb.10              | 82.55 | 0.335 | 28  |
| Sample_SPC25.Cluster14599cbin.1 | 95.97 | 1.901 | 44  |
| Sample_SPC25.Cluster2875        | 96.07 | 0.000 | 53  |
| Sample_SPC25.Cluster13107cbin.1 | 99.32 | 0.000 | 24  |
| Sample_SPC25.Cluster6801        | 98.20 | 0.898 | 52  |
| Sample_SPC25.Cluster11604cbin.1 | 98.65 | 2.684 | 26  |
| Sample_SPC25.mb.27              | 91.94 | 0.894 | 196 |
| Sample_SPC25.mb.67              | 92.00 | 1.333 | 12  |
| Sample_SPC25.Cluster33          | 98.69 | 0.909 | 77  |
| Sample_SPC25.Cluster4444cbin.1  | 84.71 | 0.090 | 35  |
| Sample_SPC25.mb.107cbin.1       | 82.49 | 2.796 | 290 |
| Sample_SPC25.mb.23cbin.1        | 93.83 | 0.000 | 141 |
| Sample_SPC25.Cluster17392cbin.1 | 98.32 | 3.803 | 107 |
| Sample_SPC25.mb.118             | 84.46 | 2.040 | 393 |
| Sample_SPC25.Cluster13379cbin.1 | 99.27 | 1.288 | 102 |
| Sample_SPC25.mb.117             | 91.25 | 0.000 | 76  |
| Sample_SPC25.mb.110cbin.1       | 97.27 | 1.342 | 31  |
| Sample_SPC25.mb.102cbin.1       | 97.98 | 1.073 | 21  |
| Sample_SPC25.mb.56              | 97.78 | 1.700 | 154 |
| Sample_SPC25.mb.103cbin.1       | 97.09 | 3.355 | 42  |
| Sample_SPC25.mb.66              | 87.91 | 3.020 | 190 |
| Sample_SPC25.Cluster12091cbin.1 | 96.45 | 3.118 | 350 |
| Sample_SPC25.mb.47              | 99.75 | 0.480 | 20  |
| Sample_SPC25.mb.59              | 91.66 | 0.000 | 27  |
| Sample_SPC25.mb.87              | 82.90 | 1.677 | 107 |
| Sample_SPC25.mb.82cbin.1        | 97.31 | 0.000 | 155 |
| Sample_SPC25.mb.98              | 86.22 | 2.107 | 315 |
| Sample_SPC25.mb.85              | 90.24 | 2.898 | 81  |
| Sample_SPC25.mb.92cbin.1        | 97.43 | 3.301 | 326 |
| Sample_SPC25.mb.14cbin.1        | 90.21 | 1.346 | 487 |
| Sample_SPC25.mb.4cbin.1         | 98.80 | 0.322 | 37  |
| Sample_SPC26.Cluster285cbin.1   | 91.92 | 0.061 | 54  |
| Sample_SPC26.mb.126             | 86.23 | 0.671 | 242 |
| Sample_SPC26.mb.12              | 88.88 | 0.854 | 37  |
| Sample_SPC26.Cluster664cbin.1   | 83.66 | 3.020 | 55  |
| Sample_SPC26.Cluster5521        | 91.94 | 0.000 | 26  |
| Sample_SPC26.mb.114             | 95.13 | 1.342 | 61  |
| Sample_SPC26.Cluster4938cbin.1  | 89.08 | 0.000 | 71  |
| Sample_SPC26.mb.21              | 96.73 | 1.165 | 109 |
| Sample_SPC26.mb.105             | 83.95 | 1.174 | 215 |
| Sample_SPC26.Cluster4153cbin.1  | 97.31 | 0.000 | 21  |
| Sample_SPC26.Cluster446cbin.1   | 80.90 | 0.000 | 24  |
| Sample_SPC26.Cluster8877        | 95.97 | 0.335 | 14  |
| Sample_SPC26.Cluster522cbin.1   | 88.22 | 0.185 | 62  |
| Sample_SPC26.Cluster3107        | 98.20 | 0.000 | 35  |
| Sample_SPC26.Cluster20cbin.1    | 96.27 | 0.621 | 135 |
| Sample_SPC26.mb.41              | 93.73 | 0.335 | 58  |
| Sample_SPC26.mb.118cbin.1       | 98.65 | 0.671 | 42  |
| Sample_SPC26.mb.38              | 82.14 | 0.000 | 298 |
| Sample_SPC26.mb.128             | 99.03 | 0.000 | 27  |
| Sample_SPC26.mb.24cbin.1        | 98.14 | 0.000 | 47  |
| Sample_SPC26.Cluster8628        | 94.73 | 0.292 | 56  |
| Sample_SPC26.mb.29              | 98.79 | 0.000 | 19  |
| Sample_SPC26.mb.20cbin.1        | 98.65 | 0.671 | 22  |
| Sample_SPC26.mb.48              | 90.60 | 1.403 | 51  |
| Sample_SPC26.mb.28cbin.1        | 95.26 | 2.104 | 26  |
| Sample_SPC26.Cluster2762cbin.1  | 88.85 | 2.664 | 378 |

|                                |       |       |     |
|--------------------------------|-------|-------|-----|
| Sample_SPC26.mb.109cbin.1      | 94.05 | 1.075 | 457 |
| Sample_SPC26.mb.15             | 98.49 | 0.000 | 26  |
| Sample_SPC26.Cluster7097       | 95.81 | 1.538 | 199 |
| Sample_SPC26.mb.71cbin.1       | 96.64 | 1.565 | 87  |
| Sample_SPC26.mb.35             | 87.14 | 0.507 | 29  |
| Sample_SPC26.mb.51             | 87.73 | 1.369 | 238 |
| Sample_SPC26.mb.16cbin.1       | 92.17 | 3.931 | 304 |
| Sample_SPC26.mb.62cbin.1       | 94.43 | 2.308 | 108 |
| Sample_SPC26.mb.82             | 87.91 | 1.097 | 94  |
| Sample_SPC26.mb.53cbin.1       | 87.02 | 0.641 | 353 |
| Sample_SPC26.mb.6cbin.1        | 99.27 | 0.241 | 144 |
| Sample_SPC26.mb.34             | 95.57 | 0.769 | 98  |
| Sample_SPC26.mb.50             | 94.99 | 0.495 | 78  |
| Sample_SPC27.Cluster3329cbin.1 | 93.93 | 1.342 | 24  |
| Sample_SPC27.Cluster9815       | 98.66 | 0.111 | 39  |
| Sample_SPC27.Cluster546        | 92.02 | 1.165 | 61  |
| Sample_SPC27.Cluster858cbin.1  | 97.58 | 2.217 | 121 |
| Sample_SPC27.Cluster6911       | 99.16 | 0.000 | 31  |
| Sample_SPC27.Cluster228cbin.1  | 90.57 | 0.671 | 34  |
| Sample_SPC27.Cluster4231       | 95.97 | 0.671 | 36  |
| Sample_SPC27.Cluster103cbin.1  | 97.98 | 1.384 | 104 |
| Sample_SPC27.mb.52             | 81.03 | 0.000 | 33  |
| Sample_SPC27.Cluster120cbin.1  | 97.45 | 0.000 | 96  |
| Sample_SPC27.Cluster5420cbin.1 | 96.64 | 0.000 | 22  |
| Sample_SPC27.mb.107cbin.1      | 99.04 | 0.000 | 88  |
| Sample_SPC27.Cluster3062cbin.1 | 95.93 | 0.671 | 18  |
| Sample_SPC27.mb.117            | 95.56 | 1.582 | 131 |
| Sample_SPC27.mb.109cbin.1      | 86.57 | 1.677 | 97  |
| Sample_SPC27.Cluster2068cbin.1 | 97.04 | 0.000 | 19  |
| Sample_SPC27.Cluster7512       | 94.63 | 0.335 | 37  |
| Sample_SPC27.Cluster5238cbin.1 | 97.58 | 0.949 | 139 |
| Sample_SPC27.Cluster323cbin.1  | 99.55 | 0.444 | 24  |
| Sample_SPC27.mb.100cbin.1      | 92.17 | 1.700 | 68  |
| Sample_SPC27.mb.20cbin.1       | 96.06 | 4.328 | 462 |
| Sample_SPC27.Cluster66cbin.1   | 99.07 | 0.691 | 27  |
| Sample_SPC27.mb.121cbin.1      | 89.24 | 0.021 | 74  |
| Sample_SPC27.mb.37             | 94.93 | 0.000 | 61  |
| Sample_SPC27.Cluster1521cbin.1 | 95.84 | 0.480 | 38  |
| Sample_SPC27.Cluster9403cbin.1 | 95.95 | 0.826 | 296 |
| Sample_SPC27.mb.41             | 93.23 | 0.740 | 33  |
| Sample_SPC27.mb.120            | 87.43 | 4.535 | 461 |
| Sample_SPC27.mb.54cbin.1       | 83.55 | 0.000 | 74  |
| Sample_SPC27.mb.79cbin.1       | 97.04 | 2.373 | 95  |
| Sample_SPC27.mb.28             | 98.30 | 1.368 | 41  |
| Sample_SPC27.mb.71             | 81.97 | 0.961 | 29  |
| Sample_SPC27.mb.1cbin.1        | 87.34 | 0.000 | 70  |
| Sample_SPC27.Cluster3474       | 95.70 | 1.672 | 66  |
| Sample_SPC27.mb.30             | 98.23 | 0.000 | 34  |
| Sample_SPC27.Cluster3889cbin.1 | 98.46 | 1.089 | 87  |
| Sample_SPC27.mb.93             | 94.30 | 0.000 | 59  |
| Sample_SPC27.mb.81             | 92.72 | 0.671 | 74  |
| Sample_SPC27.mb.85             | 96.84 | 1.324 | 85  |
| Sample_SPC27.mb.123            | 92.89 | 0.000 | 38  |
| Sample_SPC27.mb.90             | 98.51 | 0.671 | 65  |
| Sample_SPC27.mb.69cbin.1       | 98.51 | 0.766 | 107 |
| Sample_SPC28.Cluster11270      | 92.13 | 2.969 | 15  |
| Sample_SPC28.mb.2              | 89.32 | 1.123 | 50  |
| Sample_SPC28.Cluster11306      | 80.02 | 2.348 | 22  |

|                                |        |       |     |
|--------------------------------|--------|-------|-----|
| Sample_SPC28.Cluster483cbin.1  | 99.30  | 1.934 | 78  |
| Sample_SPC28.mb.20             | 95.97  | 0.000 | 52  |
| Sample_SPC28.Cluster10398      | 95.41  | 0.707 | 74  |
| Sample_SPC28.mb.22             | 93.84  | 1.342 | 209 |
| Sample_SPC28.Cluster3456cbin.1 | 96.83  | 0.021 | 88  |
| Sample_SPC28.Cluster3153cbin.1 | 97.40  | 0.000 | 32  |
| Sample_SPC28.Cluster8cbin.1    | 82.51  | 1.682 | 417 |
| Sample_SPC28.Cluster753cbin.1  | 92.93  | 0.469 | 122 |
| Sample_SPC28.Cluster5150       | 96.64  | 0.671 | 15  |
| Sample_SPC28.Cluster9cbin.1    | 81.99  | 0.614 | 290 |
| Sample_SPC28.Cluster5697cbin.1 | 89.93  | 1.342 | 31  |
| Sample_SPC28.Cluster6428       | 98.65  | 0.671 | 31  |
| Sample_SPC28.mb.24             | 99.32  | 0.671 | 26  |
| Sample_SPC28.Cluster4642cbin.1 | 81.89  | 1.396 | 423 |
| Sample_SPC28.Cluster965        | 98.63  | 0.227 | 37  |
| Sample_SPC28.Cluster8548cbin.1 | 97.94  | 0.510 | 187 |
| Sample_SPC28.mb.72cbin.1       | 97.98  | 0.000 | 49  |
| Sample_SPC28.mb.92             | 97.98  | 0.671 | 41  |
| Sample_SPC28.mb.67             | 95.19  | 1.682 | 122 |
| Sample_SPC28.mb.33             | 95.16  | 0.000 | 106 |
| Sample_SPC28.mb.40             | 93.63  | 1.980 | 192 |
| Sample_SPC28.mb.9cbin.1        | 90.59  | 3.797 | 296 |
| Sample_SPC28.mb.13             | 99.36  | 0.105 | 88  |
| Sample_SPC28.mb.62cbin.1       | 98.65  | 0.000 | 17  |
| Sample_SPC28.Cluster5040cbin.1 | 93.48  | 3.225 | 411 |
| Sample_SPC28.mb.77             | 99.03  | 1.449 | 71  |
| Sample_SPC28.mb.7cbin.1        | 97.10  | 2.548 | 73  |
| Sample_SPC28.mb.89cbin.1       | 98.65  | 0.167 | 107 |
| Sample_SPC28.mb.43cbin.1       | 91.49  | 2.540 | 214 |
| Sample_SPC30.Cluster7389cbin.1 | 80.03  | 4.250 | 394 |
| Sample_SPC30.Cluster1051       | 87.91  | 0.000 | 37  |
| Sample_SPC30.Cluster3246       | 96.41  | 1.107 | 32  |
| Sample_SPC30.mb.31             | 83.55  | 2.013 | 255 |
| Sample_SPC30.Cluster236cbin.1  | 100.00 | 0.806 | 32  |
| Sample_SPC30.mb.108cbin.1      | 90.22  | 3.683 | 191 |
| Sample_SPC30.mb.100cbin.1      | 95.97  | 0.000 | 141 |
| Sample_SPC30.mb.35             | 97.09  | 0.671 | 97  |
| Sample_SPC30.Cluster4993cbin.1 | 93.58  | 2.994 | 293 |
| Sample_SPC30.mb.24cbin.1       | 97.65  | 0.671 | 152 |
| Sample_SPC30.Cluster7999cbin.1 | 98.65  | 0.000 | 33  |
| Sample_SPC30.Cluster5293cbin.1 | 91.78  | 0.000 | 60  |
| Sample_SPC30.mb.1              | 98.83  | 0.000 | 26  |
| Sample_SPC30.mb.43cbin.1       | 94.46  | 0.671 | 89  |
| Sample_SPC30.Cluster7400cbin.1 | 86.76  | 0.671 | 330 |
| Sample_SPC30.Cluster5295cbin.1 | 96.95  | 1.576 | 87  |
| Sample_SPC30.mb.48             | 80.06  | 0.949 | 130 |
| Sample_SPC30.Cluster9176cbin.1 | 99.47  | 0.261 | 30  |
| Sample_SPC30.Cluster5217cbin.1 | 98.62  | 3.692 | 57  |
| Sample_SPC30.mb.87             | 82.75  | 0.000 | 103 |
| Sample_SPC30.mb.13             | 96.15  | 0.561 | 34  |
| Sample_SPC30.mb.73             | 96.78  | 1.165 | 78  |
| Sample_SPC30.Cluster8831cbin.1 | 99.51  | 0.483 | 112 |
| Sample_SPC30.mb.11cbin.1       | 95.97  | 1.446 | 27  |
| Sample_SPC30.mb.41             | 94.21  | 2.267 | 239 |
| Sample_SPC30.Cluster3797cbin.1 | 88.87  | 4.206 | 497 |
| Sample_SPC30.mb.78             | 92.40  | 1.582 | 177 |
| Sample_SPC30.mb.62             | 83.52  | 0.552 | 225 |
| Sample_SPC30.mb.34             | 97.72  | 2.727 | 26  |



|                                |        |       |     |
|--------------------------------|--------|-------|-----|
| Sample_SPC30.mb.99             | 89.57  | 1.811 | 194 |
| Sample_SPC30.Cluster6113cbin.1 | 99.36  | 0.949 | 100 |
| Sample_SPC30.mb.85             | 91.98  | 1.201 | 25  |
| Sample_SPC30.Cluster3074       | 99.20  | 0.076 | 108 |
| Sample_SPC30.mb.71cbin.1       | 95.24  | 1.118 | 103 |
| Sample_SPC30.mb.56cbin.1       | 95.99  | 1.285 | 197 |
| Sample_SPC30.mb.82             | 98.65  | 0.335 | 39  |
| Sample_SPC30.mb.75             | 99.32  | 0.000 | 21  |
| Sample_SPC30.mb.52             | 85.92  | 0.000 | 556 |
| Sample_SPC30.mb.68cbin.1       | 93.67  | 0.632 | 68  |
| Sample_SPC30.mb.80cbin.1       | 89.57  | 1.119 | 108 |
| Sample_SPC30.mb.74cbin.1       | 97.58  | 2.956 | 248 |
| Sample_SPC31.Cluster13517      | 93.82  | 2.969 | 40  |
| Sample_SPC31.mb.19             | 92.41  | 3.370 | 33  |
| Sample_SPC31.Cluster5528cbin.1 | 93.93  | 1.342 | 30  |
| Sample_SPC31.Cluster4761cbin.1 | 94.72  | 0.000 | 43  |
| Sample_SPC31.Cluster7149       | 92.17  | 0.671 | 35  |
| Sample_SPC31.mb.49             | 93.33  | 0.000 | 60  |
| Sample_SPC31.Cluster557cbin.1  | 80.64  | 0.000 | 128 |
| Sample_SPC31.Cluster7073cbin.1 | 88.22  | 0.111 | 348 |
| Sample_SPC31.Cluster23cbin.1   | 82.46  | 3.040 | 656 |
| Sample_SPC31.mb.36             | 85.79  | 1.845 | 172 |
| Sample_SPC31.mb.64cbin.1       | 95.56  | 2.688 | 57  |
| Sample_SPC31.mb.43cbin.1       | 95.07  | 3.147 | 138 |
| Sample_SPC31.Cluster1          | 100.00 | 0.806 | 25  |
| Sample_SPC31.mb.80cbin.1       | 94.73  | 2.551 | 257 |
| Sample_SPC31.mb.33             | 94.05  | 3.266 | 146 |
| Sample_SPC31.Cluster851cbin.1  | 91.94  | 1.908 | 128 |
| Sample_SPC31.mb.5              | 80.18  | 1.342 | 208 |
| Sample_SPC31.mb.76             | 80.16  | 2.097 | 43  |
| Sample_SPC31.Cluster9043cbin.1 | 97.31  | 1.342 | 20  |
| Sample_SPC31.Cluster3927       | 95.70  | 0.335 | 21  |
| Sample_SPC31.Cluster456        | 99.11  | 0.000 | 46  |
| Sample_SPC31.mb.100cbin.1      | 97.27  | 0.671 | 24  |
| Sample_SPC31.mb.35cbin.1       | 85.61  | 4.720 | 351 |
| Sample_SPC31.mb.60cbin.1       | 84.62  | 3.747 | 104 |
| Sample_SPC31.mb.18cbin.1       | 95.74  | 0.061 | 27  |
| Sample_SPC31.mb.65             | 93.17  | 0.671 | 90  |
| Sample_SPC31.mb.42             | 95.50  | 3.020 | 130 |
| Sample_SPC31.mb.58             | 83.33  | 0.480 | 148 |
| Sample_SPC31.mb.83             | 88.59  | 0.671 | 25  |
| Sample_SPC31.mb.39             | 96.61  | 1.449 | 45  |
| Sample_SPC31.mb.9              | 84.06  | 1.459 | 57  |
| Sample_SPC31.mb.103            | 99.24  | 0.000 | 20  |
| Sample_SPC31.Cluster9271cbin.1 | 90.28  | 3.752 | 583 |
| Sample_SPC31.mb.90             | 87.28  | 2.900 | 79  |
| Sample_SPC31.mb.104            | 92.59  | 1.440 | 75  |
| Sample_SPC31.mb.12cbin.1       | 98.75  | 2.884 | 183 |
| Sample_SPC31.Cluster6989cbin.1 | 87.26  | 1.314 | 290 |
| Sample_SPC31.mb.68cbin.1       | 100.00 | 0.089 | 41  |
| Sample_SPC31.Cluster446        | 96.77  | 0.524 | 100 |
| Sample_SPC32.mb.18cbin.1       | 96.77  | 0.000 | 48  |
| Sample_SPC32.Cluster5908       | 83.19  | 0.020 | 245 |
| Sample_SPC32.mb.23             | 97.65  | 0.000 | 32  |
| Sample_SPC32.mb.51             | 85.23  | 0.335 | 30  |
| Sample_SPC32.Cluster3302cbin.1 | 80.11  | 0.000 | 153 |
| Sample_SPC32.mb.48cbin.1       | 95.30  | 0.000 | 52  |
| Sample_SPC32.Cluster784        | 93.95  | 0.000 | 28  |

|                                 |       |       |     |
|---------------------------------|-------|-------|-----|
| Sample_SPC32.Cluster14          | 98.65 | 0.671 | 63  |
| Sample_SPC32.mb.3cbin.1         | 99.10 | 0.671 | 66  |
| Sample_SPC32.Cluster4295        | 98.55 | 1.223 | 31  |
| Sample_SPC32.mb.33cbin.1        | 97.67 | 1.265 | 58  |
| Sample_SPC32.mb.68cbin.1        | 94.83 | 4.026 | 290 |
| Sample_SPC32.mb.9cbin.1         | 96.83 | 3.263 | 325 |
| Sample_SPC32.Cluster38          | 91.25 | 0.518 | 199 |
| Sample_SPC32.Cluster5660cbin.1  | 99.32 | 0.000 | 21  |
| Sample_SPC32.mb.34cbin.1        | 98.55 | 1.442 | 34  |
| Sample_SPC32.Cluster329         | 96.87 | 0.000 | 35  |
| Sample_SPC32.Cluster2799cbin.1  | 95.02 | 0.584 | 149 |
| Sample_SPC32.Cluster6603cbin.1  | 98.94 | 1.056 | 207 |
| Sample_SPC32.Cluster5317cbin.1  | 98.65 | 1.342 | 60  |
| Sample_SPC32.mb.72cbin.1        | 91.82 | 0.480 | 30  |
| Sample_SPC32.mb.75              | 97.98 | 0.000 | 18  |
| Sample_SPC32.mb.35cbin.1        | 99.03 | 2.294 | 57  |
| Sample_SPC32.Cluster1330cbin.1  | 96.44 | 2.307 | 237 |
| Sample_SPC32.Cluster2341        | 98.65 | 0.576 | 34  |
| Sample_SPC32.mb.43cbin.1        | 92.23 | 0.000 | 37  |
| Sample_SPC32.mb.16cbin.1        | 91.13 | 1.461 | 103 |
| Sample_SPC32.mb.55cbin.1        | 91.95 | 1.159 | 370 |
| Sample_SPC34.Cluster218cbin.1   | 94.35 | 2.419 | 160 |
| Sample_SPC34.Cluster6412cbin.1  | 93.93 | 1.342 | 23  |
| Sample_SPC34.Cluster13592       | 88.88 | 0.854 | 18  |
| Sample_SPC34.mb.16              | 83.62 | 3.448 | 55  |
| Sample_SPC34.Cluster180         | 82.69 | 0.000 | 76  |
| Sample_SPC34.Cluster784cbin.1   | 88.59 | 0.671 | 41  |
| Sample_SPC34.mb.43              | 92.00 | 1.333 | 22  |
| Sample_SPC34.mb.24cbin.1        | 97.90 | 1.165 | 118 |
| Sample_SPC34.Cluster6988cbin.1  | 93.85 | 0.093 | 192 |
| Sample_SPC34.mb.39              | 87.91 | 0.000 | 15  |
| Sample_SPC34.Cluster3041        | 93.26 | 1.923 | 21  |
| Sample_SPC34.mb.32              | 88.25 | 0.692 | 128 |
| Sample_SPC34.Cluster11066cbin.1 | 99.32 | 1.006 | 22  |
| Sample_SPC34.mb.102             | 97.58 | 0.806 | 44  |
| Sample_SPC34.Cluster2616        | 97.95 | 0.680 | 26  |
| Sample_SPC34.Cluster400         | 99.00 | 0.000 | 49  |
| Sample_SPC34.mb.84cbin.1        | 97.58 | 0.806 | 44  |
| Sample_SPC34.mb.28              | 95.48 | 0.496 | 178 |
| Sample_SPC34.Cluster10388cbin.1 | 97.94 | 0.000 | 57  |
| Sample_SPC34.mb.30              | 99.36 | 0.632 | 110 |
| Sample_SPC34.mb.36              | 90.93 | 0.000 | 64  |
| Sample_SPC34.Cluster8564cbin.1  | 95.34 | 2.001 | 71  |
| Sample_SPC34.mb.21cbin.1        | 81.14 | 1.020 | 70  |
| Sample_SPC34.mb.26cbin.1        | 92.82 | 0.671 | 159 |
| Sample_SPC34.mb.61cbin.1        | 93.28 | 2.684 | 123 |
| Sample_SPC34.mb.68              | 87.21 | 2.684 | 212 |
| Sample_SPC34.mb.65              | 96.62 | 1.898 | 147 |
| Sample_SPC34.mb.78cbin.1        | 95.16 | 0.000 | 36  |
| Sample_SPC34.mb.76              | 96.87 | 0.603 | 64  |
| Sample_SPC34.mb.87              | 99.51 | 0.000 | 29  |
| Sample_SPC34.mb.74cbin.1        | 99.51 | 0.785 | 85  |
| Sample_SPC34.mb.29              | 92.31 | 1.239 | 60  |
| Sample_SPC34.mb.75              | 81.30 | 0.880 | 473 |
| Sample_SPC34.mb.95cbin.1        | 93.02 | 4.567 | 172 |
| Sample_SPC34.Cluster6455cbin.1  | 84.60 | 1.465 | 645 |
| Sample_SPC34.mb.57              | 94.56 | 2.018 | 163 |
| Sample_SPC35.Cluster4392cbin.1  | 97.84 | 0.097 | 41  |

|                                 |        |       |     |
|---------------------------------|--------|-------|-----|
| Sample_SPC35.Cluster13613       | 80.16  | 2.797 | 25  |
| Sample_SPC35.Cluster4020cbin.1  | 98.38  | 0.806 | 44  |
| Sample_SPC35.Cluster6132        | 95.43  | 1.398 | 27  |
| Sample_SPC35.mb.109cbin.1       | 91.01  | 2.808 | 16  |
| Sample_SPC35.Cluster12386cbin.1 | 95.97  | 0.671 | 24  |
| Sample_SPC35.Cluster8829        | 97.76  | 1.006 | 46  |
| Sample_SPC35.mb.113cbin.1       | 89.16  | 0.699 | 35  |
| Sample_SPC35.Cluster548cbin.1   | 87.73  | 4.423 | 107 |
| Sample_SPC35.Cluster9504        | 96.64  | 0.000 | 55  |
| Sample_SPC35.Cluster12742cbin.1 | 96.69  | 2.493 | 243 |
| Sample_SPC35.Cluster8080cbin.1  | 98.99  | 0.396 | 42  |
| Sample_SPC35.Cluster6587        | 95.45  | 1.594 | 104 |
| Sample_SPC35.mb.29              | 88.59  | 1.454 | 180 |
| Sample_SPC35.mb.31              | 97.60  | 0.000 | 32  |
| Sample_SPC35.Cluster6966cbin.1  | 86.73  | 3.416 | 355 |
| Sample_SPC35.mb.77cbin.1        | 95.69  | 3.360 | 176 |
| Sample_SPC35.mb.10              | 94.35  | 1.612 | 118 |
| Sample_SPC35.mb.64              | 84.70  | 0.671 | 201 |
| Sample_SPC35.Cluster4cbin.1     | 92.57  | 2.484 | 295 |
| Sample_SPC35.mb.80              | 81.21  | 3.030 | 16  |
| Sample_SPC35.mb.92              | 91.01  | 1.123 | 24  |
| Sample_SPC35.mb.74              | 80.02  | 4.068 | 22  |
| Sample_SPC35.mb.41cbin.1        | 86.35  | 1.342 | 41  |
| Sample_SPC35.mb.48cbin.1        | 98.62  | 2.056 | 200 |
| Sample_SPC35.mb.63              | 91.47  | 3.467 | 88  |
| Sample_SPC35.mb.13cbin.1        | 92.91  | 0.000 | 210 |
| Sample_SPC35.mb.73cbin.1        | 97.20  | 2.013 | 197 |
| Sample_SPC35.Cluster1269        | 97.35  | 0.480 | 25  |
| Sample_SPC35.mb.112cbin.1       | 94.66  | 0.311 | 33  |
| Sample_SPC35.mb.4cbin.1         | 93.23  | 1.280 | 27  |
| Sample_SPC35.mb.101cbin.1       | 95.79  | 0.000 | 19  |
| Sample_SPC35.mb.71              | 94.59  | 0.675 | 22  |
| Sample_SPC35.mb.102             | 93.36  | 1.774 | 75  |
| Sample_SPC35.mb.38cbin.1        | 98.75  | 0.937 | 52  |
| Sample_SPC35.mb.65cbin.1        | 97.14  | 0.000 | 61  |
| Sample_SPC35.Cluster7717        | 97.31  | 0.000 | 155 |
| Sample_SPC35.mb.43cbin.1        | 89.59  | 4.138 | 282 |
| Sample_SPC35.Cluster8961cbin.1  | 98.24  | 1.539 | 137 |
| Sample_SPC35.mb.9               | 93.28  | 0.000 | 121 |
| Sample_SPC35.mb.46cbin.1        | 96.88  | 0.943 | 63  |
| Sample_SPC35.mb.88              | 100.00 | 0.000 | 19  |
| Sample_SPC35.mb.115             | 95.28  | 0.000 | 86  |
| Sample_SPC35.Cluster1343        | 98.80  | 0.074 | 30  |
| Sample_SPC36.Cluster3901cbin.1  | 91.25  | 1.342 | 29  |
| Sample_SPC36.Cluster9499        | 83.97  | 2.034 | 311 |
| Sample_SPC36.mb.61              | 98.38  | 1.881 | 65  |
| Sample_SPC36.mb.4               | 88.86  | 1.490 | 456 |
| Sample_SPC36.Cluster635cbin.1   | 86.59  | 1.342 | 288 |
| Sample_SPC36.Cluster303         | 80.39  | 2.013 | 54  |
| Sample_SPC36.Cluster790cbin.1   | 95.97  | 1.342 | 51  |
| Sample_SPC36.Cluster1804        | 85.90  | 0.671 | 96  |
| Sample_SPC36.mb.63cbin.1        | 87.90  | 1.027 | 362 |
| Sample_SPC36.mb.75              | 81.92  | 3.327 | 152 |
| Sample_SPC36.Cluster5498cbin.1  | 98.02  | 2.115 | 178 |
| Sample_SPC36.mb.35              | 93.63  | 2.947 | 165 |
| Sample_SPC36.Cluster8252        | 99.32  | 0.671 | 19  |
| Sample_SPC36.Cluster3019        | 96.37  | 0.000 | 28  |
| Sample_SPC36.mb.62cbin.1        | 99.25  | 0.462 | 54  |

|                                |        |       |     |
|--------------------------------|--------|-------|-----|
| Sample_SPC36.Cluster1077cbin.1 | 96.36  | 0.454 | 25  |
| Sample_SPC36.Cluster7181       | 99.32  | 0.000 | 32  |
| Sample_SPC36.mb.20             | 99.32  | 0.671 | 21  |
| Sample_SPC36.Cluster9568       | 98.65  | 0.335 | 19  |
| Sample_SPC36.mb.58             | 97.94  | 0.000 | 105 |
| Sample_SPC36.mb.60cbin.1       | 97.29  | 1.351 | 85  |
| Sample_SPC36.mb.71             | 99.21  | 2.355 | 46  |
| Sample_SPC36.mb.87cbin.1       | 100.00 | 0.632 | 53  |
| Sample_SPC36.mb.80cbin.1       | 85.84  | 0.802 | 76  |
| Sample_SPC37.Cluster13187      | 81.62  | 1.123 | 18  |
| Sample_SPC37.Cluster13221      | 92.41  | 1.123 | 14  |
| Sample_SPC37.Cluster13116      | 100.00 | 0.111 | 25  |
| Sample_SPC37.Cluster4582cbin.1 | 98.38  | 0.806 | 35  |
| Sample_SPC37.mb.1cbin.1        | 87.00  | 3.091 | 228 |
| Sample_SPC37.Cluster7281       | 89.48  | 0.671 | 25  |
| Sample_SPC37.Cluster100cbin.1  | 80.25  | 2.621 | 236 |
| Sample_SPC37.mb.39cbin.1       | 87.29  | 3.655 | 347 |
| Sample_SPC37.mb.42cbin.1       | 95.39  | 0.335 | 68  |
| Sample_SPC37.Cluster450cbin.1  | 82.46  | 0.894 | 380 |
| Sample_SPC37.mb.10             | 89.73  | 1.901 | 179 |
| Sample_SPC37.mb.31             | 96.61  | 4.809 | 175 |
| Sample_SPC37.mb.34             | 90.38  | 3.355 | 160 |
| Sample_SPC37.Cluster4758       | 97.04  | 0.000 | 27  |
| Sample_SPC37.mb.20             | 93.73  | 2.013 | 227 |
| Sample_SPC37.mb.38             | 93.14  | 1.164 | 273 |
| Sample_SPC37.Cluster9270cbin.1 | 97.09  | 0.000 | 27  |
| Sample_SPC37.mb.21             | 91.05  | 0.000 | 69  |
| Sample_SPC37.mb.57cbin.1       | 98.73  | 1.534 | 105 |
| Sample_SPC37.Cluster9106       | 99.32  | 0.000 | 18  |
| Sample_SPC37.mb.93             | 93.93  | 2.013 | 35  |
| Sample_SPC37.mb.68cbin.1       | 82.99  | 0.671 | 91  |
| Sample_SPC37.Cluster2120cbin.1 | 98.11  | 1.761 | 63  |
| Sample_SPC37.Cluster7965cbin.1 | 80.84  | 2.651 | 380 |
| Sample_SPC37.mb.61             | 84.29  | 1.342 | 232 |
| Sample_SPC37.mb.60cbin.1       | 96.64  | 1.677 | 198 |
| Sample_SPC37.mb.67             | 95.34  | 0.921 | 113 |
| Sample_SPC37.mb.64             | 83.00  | 3.968 | 323 |
| Sample_SPC37.mb.59             | 98.71  | 3.461 | 39  |
| Sample_SPC37.Cluster9006cbin.1 | 87.48  | 4.584 | 465 |
| Sample_SPC37.mb.91cbin.1       | 95.56  | 0.021 | 82  |
| Sample_SPC37.mb.44             | 91.94  | 2.540 | 71  |
| Sample_SPC37.mb.78             | 96.92  | 0.801 | 67  |
| Sample_SPC37.mb.71             | 98.81  | 4.536 | 423 |
| Sample_SPC37.mb.15cbin.1       | 93.14  | 1.870 | 477 |
| Sample_SPC37.mb.25             | 95.94  | 0.563 | 162 |
| Sample_SPC37.mb.9cbin.1        | 98.47  | 0.676 | 103 |
| Sample_SPC37.mb.8              | 98.86  | 0.000 | 68  |
| Sample_SPC37.mb.72             | 95.96  | 1.908 | 102 |
| Sample_SPC37.mb.16cbin.1       | 99.45  | 2.370 | 275 |
| Sample_SPC37.mb.63cbin.1       | 92.44  | 4.651 | 140 |
| Sample_SPC38.Cluster9960cbin.1 | 96.30  | 2.852 | 275 |
| Sample_SPC38.Cluster169        | 80.53  | 1.128 | 46  |
| Sample_SPC38.mb.34             | 97.98  | 2.684 | 30  |
| Sample_SPC38.mb.95             | 92.69  | 0.000 | 56  |
| Sample_SPC38.mb.23             | 91.61  | 2.908 | 97  |
| Sample_SPC38.mb.29             | 95.30  | 2.181 | 115 |
| Sample_SPC38.mb.38cbin.1       | 90.54  | 1.744 | 264 |
| Sample_SPC38.mb.36             | 94.90  | 1.128 | 147 |

|                                 |        |       |     |
|---------------------------------|--------|-------|-----|
| Sample_SPC38.mb.81cbin.1        | 99.30  | 1.864 | 94  |
| Sample_SPC38.Cluster3558        | 94.63  | 0.671 | 19  |
| Sample_SPC38.Cluster8932        | 96.24  | 0.335 | 30  |
| Sample_SPC38.mb.30              | 91.70  | 1.700 | 203 |
| Sample_SPC38.mb.82              | 96.20  | 2.848 | 105 |
| Sample_SPC38.mb.47              | 89.42  | 0.000 | 33  |
| Sample_SPC38.Cluster128cbin.1   | 96.59  | 0.680 | 117 |
| Sample_SPC38.mb.50              | 97.98  | 0.000 | 31  |
| Sample_SPC38.mb.78              | 93.26  | 0.961 | 59  |
| Sample_SPC38.mb.63              | 99.98  | 1.497 | 29  |
| Sample_SPC38.Cluster5767cbin.1  | 95.56  | 2.531 | 93  |
| Sample_SPC38.mb.12              | 93.96  | 2.512 | 27  |
| Sample_SPC38.mb.51              | 99.32  | 0.000 | 22  |
| Sample_SPC38.mb.43              | 91.43  | 2.201 | 304 |
| Sample_SPC38.mb.39              | 93.03  | 0.791 | 112 |
| Sample_SPC38.mb.16              | 97.15  | 0.000 | 58  |
| Sample_SPC38.mb.11cbin.1        | 100.00 | 1.265 | 71  |
| Sample_SPC38.mb.99cbin.1        | 95.36  | 0.000 | 46  |
| Sample_SPC38.mb.69              | 91.69  | 1.132 | 15  |
| Sample_SPC38.mb.9               | 97.94  | 0.000 | 42  |
| Sample_SPC38.mb.68cbin.1        | 92.78  | 2.375 | 248 |
| Sample_SPC38.mb.17              | 93.67  | 1.132 | 212 |
| Sample_SPC38.mb.65cbin.1        | 85.22  | 4.093 | 81  |
| Sample_SPC38.mb.42              | 97.29  | 2.106 | 64  |
| Sample_SPC38.mb.89              | 96.02  | 0.384 | 72  |
| Sample_SPC39.mb.28cbin.1        | 82.55  | 0.000 | 55  |
| Sample_SPC39.mb.54              | 83.10  | 0.862 | 226 |
| Sample_SPC39.Cluster11745cbin.1 | 95.41  | 1.230 | 179 |
| Sample_SPC39.mb.37cbin.1        | 94.63  | 0.671 | 162 |
| Sample_SPC39.Cluster7153cbin.1  | 98.94  | 2.163 | 35  |
| Sample_SPC39.Cluster776cbin.1   | 95.27  | 0.675 | 61  |
| Sample_SPC39.mb.15              | 82.88  | 0.000 | 132 |
| Sample_SPC39.mb.11cbin.1        | 99.18  | 0.000 | 33  |
| Sample_SPC39.Cluster5880cbin.1  | 98.73  | 0.021 | 91  |
| Sample_SPC39.Cluster1686cbin.1  | 99.51  | 0.961 | 51  |
| Sample_SPC39.mb.61cbin.1        | 93.95  | 1.927 | 173 |
| Sample_SPC39.mb.52              | 90.60  | 0.671 | 56  |
| Sample_SPC39.mb.33              | 87.50  | 2.043 | 234 |
| Sample_SPC39.Cluster5759        | 97.98  | 0.671 | 14  |
| Sample_SPC39.mb.71cbin.1        | 97.90  | 1.165 | 105 |
| Sample_SPC39.mb.63cbin.1        | 90.81  | 0.223 | 46  |
| Sample_SPC39.mb.102cbin.1       | 95.30  | 2.013 | 96  |
| Sample_SPC39.Cluster256         | 97.33  | 0.000 | 57  |
| Sample_SPC39.mb.27              | 98.15  | 3.131 | 128 |
| Sample_SPC39.mb.56cbin.1        | 96.36  | 0.707 | 97  |
| Sample_SPC39.Cluster11623cbin.1 | 99.47  | 3.141 | 52  |
| Sample_SPC39.mb.21              | 98.65  | 0.335 | 41  |
| Sample_SPC39.mb.5cbin.1         | 94.55  | 1.247 | 187 |
| Sample_SPC39.Cluster9674cbin.1  | 97.98  | 0.920 | 71  |
| Sample_SPC39.Cluster2073        | 99.65  | 0.057 | 38  |
| Sample_SPC39.mb.78cbin.1        | 86.60  | 0.949 | 179 |
| Sample_SPC39.Cluster9455cbin.1  | 99.51  | 4.290 | 78  |
| Sample_SPC39.mb.74              | 97.26  | 0.000 | 35  |
| Sample_SPC39.mb.104             | 87.32  | 1.323 | 354 |
| Sample_SPC39.mb.79cbin.1        | 98.64  | 1.979 | 42  |
| Sample_SPC39.Cluster5123        | 95.38  | 0.000 | 73  |
| Sample_SPC39.mb.97              | 95.77  | 1.265 | 75  |
| Sample_SPC41.Cluster13347       | 89.32  | 1.284 | 24  |

|                                 |       |       |     |
|---------------------------------|-------|-------|-----|
| Sample_SPC41.Cluster13293cbin.1 | 91.57 | 2.487 | 28  |
| Sample_SPC41.mb.18cbin.1        | 85.59 | 1.008 | 164 |
| Sample_SPC41.Cluster6548        | 92.40 | 0.699 | 11  |
| Sample_SPC41.mb.23              | 90.21 | 2.089 | 84  |
| Sample_SPC41.mb.101cbin.1       | 84.21 | 1.006 | 245 |
| Sample_SPC41.mb.20cbin.1        | 91.53 | 1.881 | 116 |
| Sample_SPC41.mb.1               | 98.60 | 1.398 | 105 |
| Sample_SPC41.mb.102             | 97.98 | 0.000 | 26  |
| Sample_SPC41.mb.5               | 84.87 | 0.000 | 61  |
| Sample_SPC41.mb.11              | 93.84 | 0.671 | 111 |
| Sample_SPC41.mb.40              | 92.39 | 0.000 | 20  |
| Sample_SPC41.mb.33              | 94.72 | 0.000 | 40  |
| Sample_SPC41.mb.16cbin.1        | 99.32 | 1.677 | 50  |
| Sample_SPC41.mb.69              | 97.71 | 1.612 | 135 |
| Sample_SPC41.mb.26              | 90.60 | 4.026 | 43  |
| Sample_SPC41.mb.68              | 90.58 | 3.494 | 294 |
| Sample_SPC41.mb.87              | 90.32 | 0.000 | 23  |
| Sample_SPC41.Cluster12539       | 95.81 | 0.800 | 192 |
| Sample_SPC41.mb.83              | 91.27 | 0.671 | 42  |
| Sample_SPC41.mb.100             | 94.47 | 2.572 | 188 |
| Sample_SPC41.mb.44              | 88.78 | 3.205 | 266 |
| Sample_SPC41.mb.28              | 96.64 | 0.000 | 122 |
| Sample_SPC41.Cluster8115        | 97.09 | 0.000 | 22  |
| Sample_SPC41.mb.91              | 93.06 | 4.295 | 341 |
| Sample_SPC41.mb.95cbin.1        | 91.27 | 2.684 | 164 |
| Sample_SPC41.mb.80cbin.1        | 99.90 | 0.000 | 70  |
| Sample_SPC41.mb.94              | 95.70 | 1.006 | 183 |
| Sample_SPC41.mb.85              | 97.31 | 0.134 | 51  |
| Sample_SPC41.mb.98cbin.1        | 97.27 | 2.237 | 92  |
| Sample_SPC41.mb.99cbin.1        | 98.11 | 0.903 | 358 |
| Sample_SPC42.Cluster17162cbin.1 | 87.07 | 2.808 | 62  |
| Sample_SPC42.mb.101cbin.1       | 94.35 | 0.000 | 34  |
| Sample_SPC42.Cluster10367cbin.1 | 98.65 | 0.335 | 50  |
| Sample_SPC42.mb.114             | 98.65 | 1.342 | 122 |
| Sample_SPC42.Cluster7237        | 97.31 | 0.671 | 25  |
| Sample_SPC42.Cluster76cbin.1    | 98.32 | 1.342 | 39  |
| Sample_SPC42.mb.45              | 85.21 | 2.908 | 285 |
| Sample_SPC42.mb.29cbin.1        | 97.41 | 2.750 | 36  |
| Sample_SPC42.mb.41              | 92.55 | 0.671 | 25  |
| Sample_SPC42.Cluster7381        | 94.27 | 1.449 | 38  |
| Sample_SPC42.mb.67              | 82.93 | 0.000 | 257 |
| Sample_SPC42.mb.68              | 98.65 | 0.000 | 39  |
| Sample_SPC42.mb.112             | 84.64 | 1.863 | 308 |
| Sample_SPC42.Cluster8949cbin.1  | 98.65 | 0.976 | 19  |
| Sample_SPC42.Cluster13963cbin.1 | 99.34 | 2.123 | 112 |
| Sample_SPC42.Cluster1138cbin.1  | 99.45 | 0.681 | 24  |
| Sample_SPC42.Cluster10175       | 99.51 | 0.060 | 94  |
| Sample_SPC42.mb.77              | 92.79 | 0.671 | 196 |
| Sample_SPC42.mb.110             | 91.10 | 2.432 | 245 |
| Sample_SPC42.mb.25              | 99.32 | 0.671 | 38  |
| Sample_SPC42.mb.56              | 92.77 | 0.185 | 70  |
| Sample_SPC42.mb.115cbin.1       | 95.28 | 4.026 | 209 |
| Sample_SPC42.mb.73cbin.1        | 91.94 | 1.363 | 50  |
| Sample_SPC42.mb.62cbin.1        | 93.10 | 0.000 | 76  |
| Sample_SPC42.mb.54              | 93.54 | 1.686 | 101 |
| Sample_SPC42.mb.7cbin.1         | 91.88 | 0.743 | 144 |
| Sample_SPC42.mb.60cbin.1        | 92.11 | 3.586 | 133 |
| Sample_SPC42.mb.28              | 94.67 | 0.724 | 63  |

|                                 |       |       |     |
|---------------------------------|-------|-------|-----|
| Sample_SPC42.mb.83cbin.1        | 89.90 | 0.961 | 29  |
| Sample_SPC42.mb.78cbin.1        | 94.42 | 3.252 | 117 |
| Sample_SPC42.mb.81              | 98.11 | 0.000 | 87  |
| Sample_SPC45.Cluster1174cbin.1  | 98.27 | 4.545 | 49  |
| Sample_SPC45.Cluster1324cbin.1  | 99.30 | 1.165 | 79  |
| Sample_SPC45.mb.21cbin.1        | 94.77 | 0.000 | 29  |
| Sample_SPC45.mb.104             | 82.66 | 0.671 | 21  |
| Sample_SPC45.mb.110             | 88.90 | 1.342 | 22  |
| Sample_SPC45.mb.11              | 92.85 | 2.516 | 126 |
| Sample_SPC45.mb.48cbin.1        | 97.17 | 1.075 | 55  |
| Sample_SPC45.Cluster13128cbin.1 | 97.31 | 0.671 | 105 |
| Sample_SPC45.Cluster2583        | 88.54 | 1.923 | 32  |
| Sample_SPC45.Cluster7266        | 98.20 | 0.898 | 46  |
| Sample_SPC45.mb.28cbin.1        | 85.01 | 0.000 | 45  |
| Sample_SPC45.mb.46cbin.1        | 86.26 | 3.020 | 55  |
| Sample_SPC45.mb.18              | 85.31 | 0.000 | 122 |
| Sample_SPC45.Cluster4017cbin.1  | 82.07 | 0.377 | 85  |
| Sample_SPC45.mb.7               | 98.93 | 0.806 | 54  |
| Sample_SPC45.Cluster1974        | 97.95 | 0.226 | 49  |
| Sample_SPC45.mb.1               | 95.13 | 4.474 | 126 |
| Sample_SPC45.mb.65              | 93.49 | 1.342 | 160 |
| Sample_SPC45.mb.67              | 94.05 | 1.398 | 92  |
| Sample_SPC45.mb.91              | 90.65 | 0.806 | 121 |
| Sample_SPC45.mb.25              | 95.30 | 2.013 | 113 |
| Sample_SPC45.mb.22              | 95.08 | 2.334 | 66  |
| Sample_SPC45.mb.77              | 87.96 | 2.300 | 151 |
| Sample_SPC45.mb.49              | 96.93 | 0.000 | 14  |
| Sample_SPC45.Cluster11681cbin.1 | 98.92 | 0.000 | 86  |
| Sample_SPC45.mb.84              | 89.04 | 1.510 | 264 |
| Sample_SPC45.mb.73cbin.1        | 94.77 | 0.335 | 39  |
| Sample_SPC45.mb.2cbin.1         | 95.51 | 2.848 | 210 |
| Sample_SPC45.mb.64              | 98.65 | 3.914 | 23  |
| Sample_SPC45.mb.56cbin.1        | 94.44 | 0.671 | 181 |
| Sample_SPC45.mb.99cbin.1        | 98.94 | 1.006 | 40  |
| Sample_SPC45.mb.87              | 90.70 | 0.000 | 53  |
| Sample_SPC45.mb.89              | 92.28 | 3.623 | 184 |
| Sample_SPC45.Cluster6907cbin.1  | 98.21 | 4.213 | 69  |
| Sample_SPC45.mb.98              | 85.40 | 2.237 | 256 |
| Sample_SPC45.mb.17              | 98.84 | 0.000 | 51  |
| Sample_SPC45.mb.88cbin.1        | 98.42 | 3.397 | 25  |
| Sample_SPC45.mb.72cbin.1        | 87.40 | 0.961 | 508 |
| Sample_SPC45.Cluster911cbin.1   | 98.94 | 0.404 | 190 |
| Sample_SPC47.Cluster2599cbin.1  | 92.98 | 1.398 | 223 |
| Sample_SPC47.Cluster3860cbin.1  | 91.38 | 0.284 | 167 |
| Sample_SPC47.mb.11              | 93.42 | 4.250 | 212 |
| Sample_SPC47.Cluster374cbin.1   | 93.95 | 2.034 | 102 |
| Sample_SPC47.mb.31              | 87.24 | 0.000 | 55  |
| Sample_SPC47.Cluster1897        | 97.31 | 0.000 | 11  |
| Sample_SPC47.mb.10cbin.1        | 88.72 | 0.194 | 216 |
| Sample_SPC47.mb.5               | 86.19 | 1.021 | 313 |
| Sample_SPC47.mb.57cbin.1        | 92.69 | 0.632 | 164 |
| Sample_SPC47.Cluster1045        | 98.75 | 0.625 | 25  |
| Sample_SPC47.mb.43              | 93.05 | 4.873 | 222 |
| Sample_SPC47.mb.29cbin.1        | 87.47 | 2.348 | 46  |
| Sample_SPC47.mb.101cbin.1       | 97.27 | 2.045 | 15  |
| Sample_SPC47.mb.21              | 97.31 | 0.000 | 49  |
| Sample_SPC47.mb.61              | 84.64 | 1.121 | 312 |
| Sample_SPC47.Cluster11991cbin.1 | 91.13 | 1.265 | 49  |

|                                |       |       |     |
|--------------------------------|-------|-------|-----|
| Sample_SPC47.mb.39cbin.1       | 97.12 | 3.725 | 174 |
| Sample_SPC47.Cluster170cbin.1  | 91.23 | 0.630 | 194 |
| Sample_SPC47.mb.73cbin.1       | 92.51 | 1.476 | 176 |
| Sample_SPC47.Cluster9834cbin.1 | 99.51 | 3.910 | 70  |
| Sample_SPC47.mb.77cbin.1       | 90.38 | 1.923 | 33  |
| Sample_SPC47.mb.52             | 83.56 | 1.424 | 331 |
| Sample_SPC47.mb.96cbin.1       | 91.27 | 1.635 | 84  |
| Sample_SPC47.Cluster3686cbin.1 | 81.06 | 0.446 | 44  |
| Sample_SPC47.mb.12             | 98.11 | 0.000 | 58  |
| Sample_SPC47.mb.25             | 89.42 | 1.486 | 78  |
| Sample_SPC47.Cluster6069cbin.1 | 99.46 | 0.017 | 69  |
| Sample_SPC47.mb.66             | 92.42 | 1.242 | 76  |
| Sample_SPC47.mb.18cbin.1       | 86.29 | 0.107 | 582 |
| Sample_SPC47.Cluster3793       | 99.61 | 0.576 | 98  |
| Sample_SPC47.mb.63             | 95.66 | 0.557 | 99  |
| Sample_SPC47.Cluster5874cbin.1 | 96.98 | 0.384 | 310 |
| Sample_SPC47.mb.84             | 97.65 | 4.932 | 289 |
| Sample_SPC47.mb.76cbin.1       | 98.83 | 0.635 | 66  |
| Sample_SPC47.mb.74             | 98.33 | 0.516 | 217 |
| Sample_YPA1.mb.4cbin.1         | 97.85 | 2.019 | 153 |
| Sample_YPA1.mb.7               | 98.56 | 0.680 | 45  |
| Sample_YPA1.Cluster3           | 80.87 | 0.057 | 96  |
| Sample_YPA1.Cluster770cbin.1   | 97.90 | 1.197 | 91  |
| Sample_YPA1.mb.17              | 93.67 | 0.000 | 112 |
| Sample_YPA1.Cluster2cbin.1     | 97.98 | 0.000 | 163 |
| Sample_YPA1.Cluster14cbin.1    | 96.76 | 0.000 | 94  |
| Sample_YPA1.Cluster736cbin.1   | 94.15 | 0.097 | 69  |
| Sample_YPA1.Cluster346         | 91.44 | 0.123 | 41  |
| Sample_YPA1.mb.5               | 88.97 | 0.000 | 591 |
| Sample_YPA1.Cluster642cbin.1   | 97.33 | 0.188 | 51  |
| Sample_YPA2.Cluster7617        | 81.54 | 2.237 | 192 |
| Sample_YPA2.Cluster111         | 83.13 | 4.194 | 269 |
| Sample_YPA2.Cluster444cbin.1   | 96.64 | 1.698 | 71  |
| Sample_YPA2.mb.21              | 93.33 | 1.132 | 118 |
| Sample_YPA2.mb.71              | 93.33 | 1.333 | 50  |
| Sample_YPA2.Cluster967cbin.1   | 94.49 | 3.397 | 144 |
| Sample_YPA2.mb.17cbin.1        | 92.29 | 3.059 | 166 |
| Sample_YPA2.mb.22              | 83.32 | 1.336 | 299 |
| Sample_YPA2.mb.31              | 95.63 | 0.000 | 137 |
| Sample_YPA2.mb.69cbin.1        | 98.60 | 2.564 | 112 |
| Sample_YPA2.mb.6               | 98.65 | 0.671 | 25  |
| Sample_YPA2.mb.55              | 86.65 | 3.955 | 449 |
| Sample_YPA2.mb.7               | 88.25 | 1.812 | 318 |
| Sample_YPA2.Cluster964cbin.1   | 97.75 | 0.961 | 69  |
| Sample_YPA2.Cluster10058       | 98.65 | 0.000 | 18  |
| Sample_YPA2.Cluster9010cbin.1  | 97.98 | 1.006 | 14  |
| Sample_YPA2.mb.61              | 93.98 | 1.265 | 115 |
| Sample_YPA2.mb.26              | 96.25 | 0.185 | 63  |
| Sample_YPA2.mb.23cbin.1        | 97.05 | 1.247 | 225 |
| Sample_YPA2.mb.45cbin.1        | 98.60 | 2.544 | 170 |
| Sample_YPA2.Cluster755         | 98.11 | 0.000 | 64  |
| Sample_YPA2.Cluster6851cbin.1  | 91.09 | 0.000 | 39  |
| Sample_YPA2.mb.15cbin.1        | 95.45 | 1.136 | 186 |
| Sample_YPA2.Cluster7305        | 85.22 | 0.628 | 376 |
| Sample_YPA2.mb.5               | 89.97 | 0.000 | 39  |
| Sample_YPA2.Cluster8664cbin.1  | 98.65 | 0.183 | 47  |
| Sample_YPA2.mb.18cbin.1        | 88.60 | 2.867 | 89  |
| Sample_YPA2.mb.75              | 98.43 | 0.335 | 85  |



|                               |       |       |     |
|-------------------------------|-------|-------|-----|
| Sample_YPA2.mb.72cbin.1       | 98.71 | 0.573 | 75  |
| Sample_YPA2.mb.37             | 99.42 | 0.000 | 44  |
| Sample_YPA3.mb.22cbin.1       | 98.27 | 3.275 | 80  |
| Sample_YPA3.Cluster4908       | 98.32 | 0.671 | 52  |
| Sample_YPA3.mb.55             | 86.36 | 3.896 | 475 |
| Sample_YPA3.mb.40cbin.1       | 82.94 | 2.740 | 418 |
| Sample_YPA3.mb.54cbin.1       | 98.38 | 0.115 | 84  |
| Sample_YPA3.mb.50             | 96.75 | 0.000 | 169 |
| Sample_YPA3.mb.48cbin.1       | 90.60 | 3.691 | 64  |
| Sample_YPA3.Cluster38cbin.1   | 98.32 | 0.805 | 42  |
| Sample_YPA3.mb.61cbin.1       | 92.95 | 4.423 | 153 |
| Sample_YPA3.Cluster4466       | 80.20 | 0.000 | 13  |
| Sample_YPA3.Cluster2815cbin.1 | 90.78 | 0.000 | 41  |
| Sample_YPA3.mb.66cbin.1       | 86.57 | 1.487 | 94  |
| Sample_YPA3.mb.4              | 98.65 | 0.000 | 15  |
| Sample_YPA3.Cluster806cbin.1  | 99.51 | 0.000 | 56  |
| Sample_YPA3.Cluster5432       | 99.32 | 1.006 | 20  |
| Sample_YPA3.mb.5cbin.1        | 99.03 | 0.961 | 33  |
| Sample_YPA3.mb.52cbin.1       | 95.93 | 0.000 | 21  |
| Sample_YPA3.mb.19cbin.1       | 94.63 | 0.671 | 85  |
| Sample_YPA3.Cluster1349       | 96.64 | 4.047 | 95  |
| Sample_YPA3.mb.68             | 96.00 | 3.061 | 74  |
| Sample_YPA3.mb.58             | 93.98 | 1.257 | 169 |
| Sample_YPA3.mb.46             | 98.44 | 0.805 | 265 |
| Sample_YPA3.Cluster4437cbin.1 | 98.88 | 0.371 | 35  |
| Sample_YPA3.Cluster3753       | 99.42 | 0.512 | 41  |
| Sample_YPA3.mb.7              | 95.39 | 3.247 | 84  |
| Sample_YPA4.mb.11cbin.1       | 95.97 | 1.398 | 134 |
| Sample_YPA4.Cluster5859       | 97.98 | 2.237 | 46  |
| Sample_YPA4.mb.19             | 98.43 | 0.000 | 101 |
| Sample_YPA4.mb.30cbin.1       | 96.77 | 0.806 | 148 |
| Sample_YPA4.Cluster452cbin.1  | 92.61 | 1.342 | 32  |
| Sample_YPA4.mb.1              | 87.36 | 3.825 | 207 |
| Sample_YPA4.Cluster139        | 90.60 | 2.745 | 47  |
| Sample_YPA4.mb.22cbin.1       | 91.80 | 3.217 | 344 |
| Sample_YPA4.mb.26             | 92.61 | 0.000 | 39  |
| Sample_YPA4.Cluster45cbin.1   | 98.32 | 0.671 | 40  |
| Sample_YPA4.mb.47             | 97.65 | 3.376 | 255 |
| Sample_YPA4.Cluster5769cbin.1 | 88.60 | 0.021 | 45  |
| Sample_YPA4.Cluster3321cbin.1 | 83.70 | 1.442 | 417 |
| Sample_YPA4.Cluster7833       | 98.65 | 0.000 | 17  |
| Sample_YPA4.Cluster3723cbin.1 | 96.66 | 0.231 | 42  |
| Sample_YPA4.Cluster7082       | 99.32 | 1.006 | 20  |
| Sample_YPA4.mb.50             | 94.21 | 3.018 | 166 |
| Sample_YPA4.mb.52             | 90.86 | 0.961 | 26  |
| Sample_YPA4.mb.46cbin.1       | 86.15 | 2.792 | 302 |
| Sample_YPA4.mb.58             | 90.56 | 3.424 | 386 |
| Sample_YPA4.mb.65cbin.1       | 94.63 | 1.342 | 91  |
| Sample_YPA4.Cluster7499       | 98.65 | 0.000 | 74  |
| Sample_YPA4.mb.70             | 91.90 | 0.000 | 20  |
| Sample_YPA4.mb.43cbin.1       | 99.44 | 2.721 | 151 |
| Sample_YPA4.mb.9cbin.1        | 94.63 | 0.671 | 82  |
| Sample_YPA4.mb.63cbin.1       | 99.36 | 3.494 | 89  |
| Sample_YPA4.mb.15cbin.1       | 99.25 | 0.185 | 40  |
| Sample_YPA4.mb.64cbin.1       | 98.65 | 0.512 | 59  |
| Sample_YPA5.Cluster28cbin.1   | 90.04 | 2.348 | 120 |
| Sample_YPA5.Cluster1676cbin.1 | 84.25 | 0.740 | 219 |
| Sample_YPA5.mb.19cbin.1       | 87.58 | 0.894 | 88  |

|                               |       |       |     |
|-------------------------------|-------|-------|-----|
| Sample_YPA5.mb.14             | 89.26 | 1.677 | 57  |
| Sample_YPA5.mb.16             | 93.28 | 0.000 | 113 |
| Sample_YPA5.Cluster7017       | 81.87 | 0.000 | 18  |
| Sample_YPA5.mb.22cbin.1       | 98.99 | 0.000 | 44  |
| Sample_YPA5.Cluster3216       | 98.02 | 1.250 | 37  |
| Sample_YPA5.Cluster1060       | 98.75 | 0.625 | 22  |
| Sample_YPA5.Cluster19         | 99.28 | 1.216 | 70  |
| Sample_YPA5.mb.52cbin.1       | 90.93 | 1.251 | 49  |
| Sample_YPA5.mb.23             | 98.07 | 0.961 | 145 |
| Sample_YPA5.mb.69             | 96.64 | 1.342 | 58  |
| Sample_YPA5.Cluster577cbin.1  | 89.11 | 0.641 | 50  |
| Sample_YPA5.mb.39             | 97.48 | 2.028 | 101 |
| Sample_YPA5.Cluster4724       | 98.55 | 0.000 | 56  |
| Sample_YPA5.mb.29             | 94.63 | 0.155 | 180 |
| Sample_YPA5.mb.13cbin.1       | 97.16 | 0.377 | 54  |
| Sample_YPA5.mb.47cbin.1       | 99.36 | 0.632 | 106 |
| Sample_YPA5.mb.8              | 95.65 | 0.801 | 40  |
| Sample_YPA5.mb.7              | 99.32 | 0.305 | 20  |
| Sample_YPA5.mb.81             | 87.25 | 3.071 | 49  |
| Sample_YPA5.Cluster1993cbin.1 | 93.46 | 0.433 | 156 |
| Sample_YPA5.mb.28             | 94.37 | 0.310 | 96  |
| Sample_YPA5.mb.43             | 98.83 | 0.000 | 57  |
| Sample_YPA5.mb.38cbin.1       | 95.98 | 4.195 | 289 |
| Sample_YPA5.mb.68             | 93.71 | 0.724 | 42  |
| Sample_YPA5.mb.30cbin.1       | 96.40 | 1.679 | 164 |
| Sample_YPA5.mb.74cbin.1       | 96.64 | 1.887 | 251 |
| Sample_YPA5.Cluster2191cbin.1 | 97.63 | 2.500 | 156 |
| Sample_YPA5.Cluster3451cbin.1 | 98.65 | 0.384 | 64  |
| Sample_YPA5.mb.40             | 92.74 | 1.654 | 51  |
| Sample_YPA6.Cluster5179cbin.1 | 91.93 | 0.026 | 59  |
| Sample_YPA6.mb.53             | 92.41 | 1.123 | 29  |
| Sample_YPA6.Cluster7899       | 92.17 | 0.671 | 20  |
| Sample_YPA6.Cluster81cbin.1   | 84.56 | 2.940 | 87  |
| Sample_YPA6.mb.10             | 91.94 | 2.034 | 132 |
| Sample_YPA6.mb.42             | 98.65 | 2.684 | 55  |
| Sample_YPA6.Cluster3578cbin.1 | 98.65 | 0.671 | 28  |
| Sample_YPA6.mb.63             | 88.06 | 2.348 | 214 |
| Sample_YPA6.mb.13             | 97.27 | 0.000 | 21  |
| Sample_YPA6.mb.47             | 95.01 | 3.174 | 375 |
| Sample_YPA6.mb.60             | 96.61 | 1.690 | 60  |
| Sample_YPA6.mb.43             | 93.77 | 0.000 | 150 |
| Sample_YPA6.mb.28             | 88.58 | 2.125 | 420 |
| Sample_YPA6.Cluster1155       | 99.03 | 0.480 | 21  |
| Sample_YPA6.mb.61             | 98.73 | 2.415 | 52  |
| Sample_YPA6.mb.27cbin.1       | 95.88 | 1.371 | 321 |
| Sample_YPA6.mb.12cbin.1       | 98.92 | 1.612 | 143 |
| Sample_YPA6.mb.34             | 95.00 | 0.867 | 33  |
| Sample_YPA6.mb.24             | 96.92 | 0.000 | 47  |
| Sample_YPA6.mb.58             | 93.36 | 4.022 | 130 |
| Sample_YPA7.mb.29             | 93.82 | 2.969 | 51  |
| Sample_YPA7.mb.45             | 88.20 | 1.123 | 77  |
| Sample_YPA7.mb.19             | 80.02 | 1.677 | 19  |
| Sample_YPA7.mb.18             | 95.30 | 2.237 | 167 |
| Sample_YPA7.mb.32cbin.1       | 93.06 | 0.671 | 163 |
| Sample_YPA7.Cluster910cbin.1  | 93.51 | 0.123 | 95  |
| Sample_YPA7.Cluster251cbin.1  | 92.52 | 1.442 | 258 |
| Sample_YPA7.mb.42             | 82.06 | 2.531 | 361 |
| Sample_YPA7.mb.69             | 85.87 | 0.244 | 280 |

|                               |        |       |     |
|-------------------------------|--------|-------|-----|
| Sample_YPA7.Cluster3867cbin.1 | 97.98  | 0.335 | 16  |
| Sample_YPA7.Cluster3122       | 96.98  | 2.295 | 16  |
| Sample_YPA7.mb.16             | 93.16  | 1.360 | 254 |
| Sample_YPA7.mb.24             | 99.32  | 1.006 | 66  |
| Sample_YPA7.mb.31cbin.1       | 94.24  | 3.231 | 105 |
| Sample_YPA7.Cluster628        | 97.95  | 0.000 | 38  |
| Sample_YPA7.mb.26cbin.1       | 93.95  | 1.342 | 77  |
| Sample_YPA7.mb.35             | 89.88  | 0.000 | 81  |
| Sample_YPA7.mb.1              | 96.13  | 1.690 | 42  |
| Sample_YPA7.mb.60cbin.1       | 97.27  | 0.356 | 155 |
| Sample_YPA7.Cluster176cbin.1  | 98.31  | 0.480 | 22  |
| Sample_YPA7.mb.9              | 90.60  | 1.006 | 35  |
| Sample_YPA7.Cluster2391cbin.1 | 89.38  | 0.891 | 48  |
| Sample_YPA7.mb.7              | 90.58  | 1.381 | 193 |
| Sample_YPA7.mb.54             | 96.68  | 4.697 | 27  |
| Sample_YPA7.mb.80             | 95.59  | 0.335 | 25  |
| Sample_YPA7.mb.85             | 99.32  | 0.427 | 27  |
| Sample_YPA7.mb.63cbin.1       | 99.32  | 2.083 | 97  |
| Sample_YPA7.mb.81             | 99.11  | 0.030 | 63  |
| Sample_YPA7.Cluster3591cbin.1 | 99.61  | 1.923 | 63  |
| Sample_YPA7.Cluster7303cbin.1 | 93.26  | 1.034 | 566 |
| Sample_YPA7.Cluster2095       | 99.03  | 0.384 | 88  |
| Sample_YPA7.mb.64             | 80.42  | 4.951 | 307 |
| Sample_YPA7.mb.76             | 88.39  | 0.929 | 97  |
| Sample_YPA7.mb.22cbin.1       | 95.98  | 2.464 | 151 |
| Sample_YPA7.mb.67             | 98.06  | 2.777 | 163 |
| Sample_YPA7.mb.62             | 97.87  | 0.805 | 56  |
| Sample_YPB1.Cluster1591       | 88.59  | 0.000 | 40  |
| Sample_YPB1.mb.28cbin.1       | 83.55  | 0.793 | 38  |
| Sample_YPB1.Cluster327cbin.1  | 92.61  | 0.000 | 24  |
| Sample_YPB1.Cluster1720       | 99.18  | 0.000 | 18  |
| Sample_YPB1.Cluster198cbin.1  | 98.41  | 0.680 | 228 |
| Sample_YPB1.Cluster782cbin.1  | 96.83  | 0.021 | 74  |
| Sample_YPB1.Cluster708        | 94.63  | 0.000 | 10  |
| Sample_YPB1.Cluster3867       | 99.32  | 0.671 | 19  |
| Sample_YPB1.mb.77             | 100.00 | 2.013 | 306 |
| Sample_YPB1.Cluster425cbin.1  | 85.68  | 0.454 | 17  |
| Sample_YPB1.mb.6cbin.1        | 98.38  | 0.806 | 35  |
| Sample_YPB1.mb.16             | 90.58  | 0.340 | 81  |
| Sample_YPB1.mb.21             | 99.53  | 0.460 | 28  |
| Sample_YPB1.mb.39             | 99.11  | 0.000 | 30  |
| Sample_YPB1.Cluster447cbin.1  | 98.31  | 0.000 | 73  |
| Sample_YPB1.mb.23             | 92.85  | 0.552 | 58  |
| Sample_YPB1.mb.59cbin.1       | 95.37  | 2.721 | 116 |
| Sample_YPB1.mb.38             | 96.23  | 0.000 | 31  |
| Sample_YPB1.mb.8cbin.1        | 96.87  | 0.000 | 36  |
| Sample_YPB1.mb.17cbin.1       | 96.45  | 1.756 | 108 |
| Sample_YPB1.Cluster1122cbin.1 | 99.09  | 0.724 | 45  |
| Sample_YPB1.mb.36             | 94.36  | 1.424 | 146 |
| Sample_YPB1.mb.49cbin.1       | 99.27  | 2.415 | 63  |
| Sample_YPB1.Cluster2259cbin.1 | 94.42  | 0.537 | 448 |
| Sample_YPB1.Cluster1036cbin.1 | 93.68  | 0.991 | 82  |
| Sample_YPB1.mb.32             | 96.60  | 1.132 | 228 |
| Sample_YPB1.mb.44cbin.1       | 97.73  | 1.537 | 98  |
| Sample_YPB2.Cluster12916      | 84.55  | 1.123 | 14  |
| Sample_YPB2.Cluster12477      | 100.00 | 0.111 | 20  |
| Sample_YPB2.Cluster11555      | 98.65  | 0.000 | 8   |
| Sample_YPB2.Cluster5718cbin.1 | 95.01  | 3.041 | 208 |

|                               |        |       |     |
|-------------------------------|--------|-------|-----|
| Sample_YPB2.mb.48             | 92.69  | 3.932 | 100 |
| Sample_YPB2.mb.21             | 85.89  | 2.516 | 315 |
| Sample_YPB2.Cluster87         | 85.90  | 0.671 | 75  |
| Sample_YPB2.Cluster2520       | 82.01  | 0.000 | 15  |
| Sample_YPB2.mb.15             | 87.29  | 3.020 | 101 |
| Sample_YPB2.mb.24cbin.1       | 88.92  | 0.671 | 56  |
| Sample_YPB2.Cluster9399cbin.1 | 99.03  | 1.223 | 28  |
| Sample_YPB2.mb.32cbin.1       | 98.94  | 0.632 | 45  |
| Sample_YPB2.Cluster1278       | 98.75  | 0.625 | 30  |
| Sample_YPB2.mb.4cbin.1        | 94.63  | 3.327 | 646 |
| Sample_YPB2.mb.5cbin.1        | 96.43  | 2.214 | 92  |
| Sample_YPB2.Cluster1528cbin.1 | 98.52  | 1.442 | 76  |
| Sample_YPB2.mb.93cbin.1       | 92.93  | 1.342 | 28  |
| Sample_YPB2.Cluster9659       | 99.32  | 1.006 | 14  |
| Sample_YPB2.mb.56             | 98.99  | 0.000 | 40  |
| Sample_YPB2.mb.1              | 95.90  | 2.631 | 101 |
| Sample_YPB2.mb.6              | 90.75  | 2.403 | 218 |
| Sample_YPB2.mb.58cbin.1       | 95.87  | 1.360 | 269 |
| Sample_YPB2.mb.73             | 95.96  | 1.209 | 115 |
| Sample_YPB2.mb.27cbin.1       | 96.63  | 4.347 | 106 |
| Sample_YPB2.mb.74             | 95.56  | 0.000 | 122 |
| Sample_YPB2.mb.83             | 95.89  | 2.173 | 42  |
| Sample_YPB2.mb.67cbin.1       | 100.00 | 0.227 | 17  |
| Sample_YPB2.mb.69             | 82.27  | 1.107 | 44  |
| Sample_YPB2.mb.72             | 94.82  | 4.057 | 182 |
| Sample_YPB2.Cluster3860       | 97.69  | 0.000 | 107 |
| Sample_YPB2.mb.75cbin.1       | 97.12  | 4.375 | 250 |
| Sample_YPB2.Cluster947        | 99.67  | 0.773 | 33  |
| Sample_YPB3.Cluster3030cbin.1 | 88.57  | 3.187 | 368 |
| Sample_YPB3.mb.31             | 80.87  | 0.671 | 352 |
| Sample_YPB3.mb.59             | 97.58  | 2.688 | 148 |
| Sample_YPB3.mb.47cbin.1       | 94.07  | 0.000 | 159 |
| Sample_YPB3.Cluster1cbin.1    | 85.48  | 0.685 | 19  |
| Sample_YPB3.Cluster1244       | 90.60  | 0.000 | 23  |
| Sample_YPB3.Cluster2914       | 99.18  | 0.000 | 23  |
| Sample_YPB3.mb.39cbin.1       | 98.31  | 1.898 | 121 |
| Sample_YPB3.mb.8              | 90.71  | 3.976 | 278 |
| Sample_YPB3.mb.20             | 93.26  | 0.844 | 244 |
| Sample_YPB3.Cluster4065       | 91.27  | 1.006 | 14  |
| Sample_YPB3.mb.26             | 95.50  | 0.680 | 246 |
| Sample_YPB3.Cluster145cbin.1  | 96.60  | 1.006 | 51  |
| Sample_YPB3.Cluster33cbin.1   | 85.94  | 1.152 | 56  |
| Sample_YPB3.mb.40             | 83.61  | 1.489 | 284 |
| Sample_YPB3.Cluster1000       | 98.78  | 0.598 | 24  |
| Sample_YPB3.Cluster867cbin.1  | 95.80  | 0.598 | 84  |
| Sample_YPB3.Cluster1114cbin.1 | 90.00  | 1.250 | 18  |
| Sample_YPB3.Cluster198        | 94.51  | 2.163 | 157 |
| Sample_YPB3.Cluster2149cbin.1 | 90.54  | 0.619 | 61  |
| Sample_YPB3.Cluster2564       | 95.91  | 0.024 | 36  |
| Sample_YPB4.Cluster6185       | 93.25  | 1.284 | 12  |
| Sample_YPB4.mb.26cbin.1       | 87.63  | 1.174 | 353 |
| Sample_YPB4.Cluster2405       | 94.63  | 0.000 | 25  |
| Sample_YPB4.Cluster2143       | 98.65  | 0.671 | 35  |
| Sample_YPB4.Cluster3798       | 93.67  | 1.582 | 50  |
| Sample_YPB4.mb.5cbin.1        | 95.88  | 3.797 | 206 |
| Sample_YPB4.Cluster1733       | 88.31  | 0.000 | 24  |
| Sample_YPB4.mb.68             | 97.67  | 1.707 | 66  |
| Sample_YPB4.mb.8cbin.1        | 95.30  | 0.000 | 28  |

|                               |        |       |     |
|-------------------------------|--------|-------|-----|
| Sample_YPB4.Cluster16         | 92.51  | 4.081 | 39  |
| Sample_YPB4.Cluster60cbin.1   | 97.73  | 0.816 | 230 |
| Sample_YPB4.Cluster342        | 96.46  | 0.000 | 52  |
| Sample_YPB4.mb.62             | 83.84  | 2.923 | 149 |
| Sample_YPB4.mb.43cbin.1       | 85.70  | 1.434 | 407 |
| Sample_YPB4.Cluster4709cbin.1 | 97.98  | 0.000 | 21  |
| Sample_YPB4.mb.19cbin.1       | 95.19  | 0.598 | 30  |
| Sample_YPB4.Cluster3580       | 98.65  | 1.006 | 12  |
| Sample_YPB4.mb.30cbin.1       | 89.22  | 0.000 | 78  |
| Sample_YPB4.mb.34             | 99.22  | 0.000 | 10  |
| Sample_YPB4.Cluster5996       | 99.47  | 0.000 | 27  |
| Sample_YPB4.mb.29cbin.1       | 93.95  | 2.268 | 174 |
| Sample_YPB4.Cluster170        | 100.00 | 0.681 | 12  |
| Sample_YPB4.mb.60cbin.1       | 99.94  | 0.460 | 58  |
| Sample_YPB4.mb.55             | 87.93  | 2.898 | 275 |
| Sample_YPB4.mb.51cbin.1       | 93.58  | 0.619 | 62  |
| Sample_YPB4.Cluster1428       | 97.76  | 2.602 | 34  |
| Sample_YPB4.mb.13             | 96.73  | 4.967 | 398 |
| Sample_YPB4.mb.11cbin.1       | 94.54  | 3.822 | 256 |
| Sample_YPB5.Cluster8314cbin.1 | 88.00  | 1.333 | 152 |
| Sample_YPB5.Cluster5620cbin.1 | 83.75  | 3.803 | 357 |
| Sample_YPB5.Cluster3185cbin.1 | 88.46  | 0.020 | 154 |
| Sample_YPB5.mb.25cbin.1       | 82.48  | 0.134 | 315 |
| Sample_YPB5.mb.30cbin.1       | 80.77  | 0.815 | 72  |
| Sample_YPB5.mb.42             | 94.63  | 0.671 | 31  |
| Sample_YPB5.Cluster5686       | 94.92  | 0.801 | 37  |
| Sample_YPB5.mb.19cbin.1       | 98.65  | 0.671 | 55  |
| Sample_YPB5.mb.24cbin.1       | 97.98  | 0.859 | 85  |
| Sample_YPB5.Cluster488cbin.1  | 97.37  | 0.806 | 110 |
| Sample_YPB5.Cluster5204cbin.1 | 95.30  | 0.335 | 26  |
| Sample_YPB5.mb.65cbin.1       | 92.87  | 0.073 | 192 |
| Sample_YPB5.Cluster2663cbin.1 | 86.24  | 2.565 | 352 |
| Sample_YPB5.Cluster1628cbin.1 | 98.33  | 0.185 | 47  |
| Sample_YPB5.Cluster5889cbin.1 | 98.65  | 1.118 | 41  |
| Sample_YPB5.mb.36cbin.1       | 88.08  | 1.901 | 235 |
| Sample_YPB5.mb.75             | 93.93  | 1.342 | 32  |
| Sample_YPB5.mb.56             | 97.42  | 1.342 | 95  |
| Sample_YPB5.Cluster1199cbin.1 | 99.90  | 0.632 | 103 |
| Sample_YPB5.Cluster4488cbin.1 | 97.58  | 2.415 | 86  |
| Sample_YPB5.mb.23             | 91.08  | 1.984 | 269 |
| Sample_YPB5.mb.57             | 89.26  | 1.405 | 32  |
| Sample_YPB5.Cluster400cbin.1  | 96.56  | 0.625 | 99  |
| Sample_YPB5.mb.5              | 98.07  | 0.961 | 35  |
| Sample_YPB5.Cluster1691cbin.1 | 94.90  | 0.377 | 50  |
| Sample_YPB5.mb.54cbin.1       | 98.99  | 0.000 | 42  |
| Sample_YPB5.mb.63cbin.1       | 95.56  | 3.797 | 196 |
| Sample_YPB5.Cluster7289cbin.1 | 98.65  | 0.000 | 49  |
| Sample_YPB5.mb.38             | 84.05  | 0.483 | 46  |
| Sample_YPB5.mb.46             | 93.41  | 0.223 | 130 |
| Sample_YPB5.mb.33             | 90.53  | 0.483 | 206 |
| Sample_YPB5.mb.74             | 94.63  | 0.000 | 18  |
| Sample_YPB5.mb.47             | 84.70  | 0.373 | 191 |
| Sample_YPB5.mb.78             | 96.64  | 0.671 | 115 |
| Sample_YPB5.Cluster6949cbin.1 | 92.90  | 1.281 | 198 |
| Sample_YPB5.Cluster2441cbin.1 | 95.19  | 0.743 | 91  |
| Sample_YPB5.mb.9              | 99.36  | 0.000 | 65  |
| Sample_YPB5.mb.40             | 95.16  | 2.416 | 44  |
| Sample_YPB6.Cluster2046cbin.1 | 100.00 | 3.667 | 58  |

|                                |       |       |     |
|--------------------------------|-------|-------|-----|
| Sample_YPB6.mb.27              | 88.92 | 1.165 | 437 |
| Sample_YPB6.mb.42cbin.1        | 96.64 | 0.000 | 130 |
| Sample_YPB6.mb.23cbin.1        | 88.71 | 4.861 | 283 |
| Sample_YPB6.mb.37cbin.1        | 98.32 | 0.000 | 68  |
| Sample_YPB6.mb.30cbin.1        | 82.28 | 2.040 | 417 |
| Sample_YPB6.mb.47cbin.1        | 92.83 | 1.975 | 60  |
| Sample_YPB6.mb.2               | 98.01 | 0.000 | 85  |
| Sample_YPB6.Cluster3534        | 99.32 | 0.671 | 14  |
| Sample_YPB6.mb.12              | 85.12 | 3.200 | 705 |
| Sample_YPB6.mb.13cbin.1        | 96.76 | 0.105 | 212 |
| Sample_YPB6.Cluster3334cbin.1  | 97.26 | 0.839 | 74  |
| Sample_YPB6.mb.24              | 80.35 | 0.495 | 55  |
| Sample_YPB6.Cluster1198cbin.1  | 99.15 | 1.582 | 125 |
| Sample_YPB6.Cluster1316cbin.1  | 98.70 | 0.000 | 42  |
| Sample_YPB6.Cluster2752cbin.1  | 95.44 | 4.125 | 115 |
| Sample_YPB6.mb.51              | 95.26 | 1.437 | 139 |
| Sample_YPB7.Cluster12975       | 87.92 | 0.561 | 39  |
| Sample_YPB7.Cluster12994       | 94.66 | 2.666 | 22  |
| Sample_YPB7.Cluster1523cbin.1  | 82.07 | 1.075 | 241 |
| Sample_YPB7.mb.11              | 96.77 | 0.000 | 47  |
| Sample_YPB7.Cluster6653        | 91.49 | 0.671 | 40  |
| Sample_YPB7.Cluster613         | 93.28 | 1.342 | 49  |
| Sample_YPB7.mb.12              | 88.42 | 4.484 | 197 |
| Sample_YPB7.Cluster244cbin.1   | 91.77 | 4.276 | 296 |
| Sample_YPB7.Cluster3668cbin.1  | 94.63 | 4.138 | 55  |
| Sample_YPB7.mb.33              | 89.55 | 2.957 | 287 |
| Sample_YPB7.Cluster5070cbin.1  | 96.60 | 0.671 | 23  |
| Sample_YPB7.mb.34              | 91.97 | 0.134 | 137 |
| Sample_YPB7.mb.39              | 92.97 | 1.360 | 341 |
| Sample_YPB7.mb.28              | 94.15 | 1.461 | 58  |
| Sample_YPB7.mb.69              | 93.95 | 0.335 | 37  |
| Sample_YPB7.mb.7cbin.1         | 95.06 | 1.587 | 253 |
| Sample_YPB7.mb.29              | 93.31 | 0.632 | 291 |
| Sample_YPB7.Cluster1361        | 99.03 | 0.961 | 20  |
| Sample_YPB7.mb.23              | 98.86 | 0.000 | 109 |
| Sample_YPB7.mb.76              | 96.92 | 1.870 | 78  |
| Sample_YPB7.Cluster10119cbin.1 | 83.35 | 0.384 | 329 |
| Sample_YPB7.mb.50cbin.1        | 97.84 | 0.537 | 146 |
| Sample_YPB7.mb.40cbin.1        | 94.81 | 1.425 | 189 |
| Sample_YPB7.mb.20              | 93.35 | 3.358 | 139 |
| Sample_YPB7.mb.67              | 97.88 | 0.000 | 46  |
| Sample_YPB7.Cluster8264cbin.1  | 99.63 | 0.753 | 84  |
| Sample_YPB7.mb.65cbin.1        | 99.63 | 0.181 | 54  |
| Sample_YPC1.Cluster3916        | 93.25 | 1.284 | 2   |
| Sample_YPC1.Cluster2324cbin.1  | 87.18 | 0.949 | 42  |
| Sample_YPC1.mb.55              | 97.50 | 1.700 | 129 |
| Sample_YPC1.Cluster838         | 93.28 | 0.000 | 78  |
| Sample_YPC1.mb.52cbin.1        | 90.93 | 0.000 | 13  |
| Sample_YPC1.Cluster22cbin.1    | 91.94 | 2.684 | 27  |
| Sample_YPC1.Cluster992cbin.1   | 98.94 | 1.265 | 34  |
| Sample_YPC1.mb.58              | 89.93 | 0.000 | 84  |
| Sample_YPC1.mb.45              | 96.77 | 0.806 | 15  |
| Sample_YPC1.Cluster62cbin.1    | 88.43 | 0.000 | 33  |
| Sample_YPC1.mb.63cbin.1        | 91.29 | 0.632 | 56  |
| Sample_YPC1.Cluster479cbin.1   | 98.10 | 0.000 | 57  |
| Sample_YPC1.Cluster214cbin.1   | 97.97 | 0.340 | 58  |
| Sample_YPC1.Cluster1720        | 99.32 | 1.006 | 18  |
| Sample_YPC1.mb.51              | 97.19 | 0.641 | 109 |

|                                |       |       |     |
|--------------------------------|-------|-------|-----|
| Sample_YPC1.mb.19cbin.1        | 88.80 | 0.681 | 42  |
| Sample_YPC1.Cluster77          | 96.87 | 0.000 | 10  |
| Sample_YPC1.Cluster10cbin.1    | 99.36 | 0.742 | 65  |
| Sample_YPC1.Cluster1799        | 96.57 | 0.000 | 29  |
| Sample_YPC1.mb.33              | 99.57 | 2.345 | 57  |
| Sample_YPC1.mb.32              | 86.88 | 1.707 | 171 |
| Sample_YPC1.Cluster660cbin.1   | 97.46 | 0.000 | 80  |
| Sample_YPC1.mb.49              | 99.32 | 0.134 | 145 |
| Sample_YPC1.mb.13              | 99.61 | 0.000 | 42  |
| Sample_YPC1.mb.4cbin.1         | 95.53 | 0.123 | 64  |
| Sample_YPC2.Cluster12313       | 92.69 | 4.494 | 22  |
| Sample_YPC2.Cluster11916       | 97.33 | 0.111 | 42  |
| Sample_YPC2.Cluster2866cbin.1  | 95.96 | 0.806 | 37  |
| Sample_YPC2.Cluster11967cbin.1 | 88.81 | 0.000 | 11  |
| Sample_YPC2.mb.2               | 90.49 | 0.671 | 145 |
| Sample_YPC2.Cluster314         | 87.71 | 1.258 | 88  |
| Sample_YPC2.mb.4               | 84.34 | 1.597 | 190 |
| Sample_YPC2.mb.72              | 88.20 | 1.685 | 121 |
| Sample_YPC2.mb.58              | 99.30 | 1.165 | 143 |
| Sample_YPC2.mb.28              | 90.32 | 0.000 | 69  |
| Sample_YPC2.mb.45              | 91.27 | 1.525 | 48  |
| Sample_YPC2.mb.42cbin.1        | 97.04 | 1.956 | 45  |
| Sample_YPC2.mb.11              | 92.61 | 0.000 | 10  |
| Sample_YPC2.Cluster623cbin.1   | 97.73 | 0.680 | 241 |
| Sample_YPC2.mb.21              | 93.91 | 2.403 | 78  |
| Sample_YPC2.mb.49cbin.1        | 93.73 | 1.565 | 286 |
| Sample_YPC2.Cluster2726cbin.1  | 97.27 | 1.006 | 34  |
| Sample_YPC2.Cluster9181        | 99.32 | 1.677 | 15  |
| Sample_YPC2.mb.10              | 95.23 | 0.000 | 28  |
| Sample_YPC2.mb.66              | 93.28 | 0.041 | 25  |
| Sample_YPC2.Cluster1309        | 95.09 | 0.000 | 54  |
| Sample_YPC2.Cluster752cbin.1   | 94.82 | 0.946 | 145 |
| Sample_YPC2.mb.39cbin.1        | 98.18 | 2.894 | 132 |
| Sample_YPC2.mb.77              | 96.64 | 1.610 | 57  |
| Sample_YPC2.mb.25cbin.1        | 92.61 | 2.125 | 288 |
| Sample_YPC2.mb.9cbin.1         | 86.12 | 0.671 | 111 |
| Sample_YPC2.mb.31              | 95.52 | 2.572 | 230 |
| Sample_YPC2.Cluster11303cbin.1 | 99.51 | 2.173 | 86  |
| Sample_YPC2.Cluster10628       | 95.84 | 0.000 | 74  |
| Sample_YPC2.mb.54cbin.1        | 91.09 | 0.000 | 40  |
| Sample_YPC2.Cluster6818cbin.1  | 99.62 | 0.000 | 19  |
| Sample_YPC2.mb.59cbin.1        | 92.12 | 0.632 | 98  |
| Sample_YPC2.Cluster5220cbin.1  | 95.76 | 0.000 | 32  |
| Sample_YPC2.Cluster7809cbin.1  | 97.49 | 4.306 | 85  |
| Sample_YPC2.Cluster5530        | 99.23 | 0.000 | 41  |
| Sample_YPC3.mb.11              | 82.05 | 2.963 | 449 |
| Sample_YPC3.Cluster277         | 99.19 | 0.806 | 18  |
| Sample_YPC3.mb.16              | 98.43 | 0.000 | 88  |
| Sample_YPC3.Cluster3714cbin.1  | 94.51 | 1.054 | 51  |
| Sample_YPC3.Cluster3877        | 99.18 | 0.000 | 24  |
| Sample_YPC3.mb.1               | 97.29 | 1.698 | 259 |
| Sample_YPC3.Cluster4271cbin.1  | 97.46 | 1.265 | 56  |
| Sample_YPC3.Cluster65          | 89.11 | 0.000 | 36  |
| Sample_YPC3.Cluster333cbin.1   | 94.55 | 0.680 | 226 |
| Sample_YPC3.Cluster3516        | 99.38 | 1.497 | 44  |
| Sample_YPC3.Cluster1980cbin.1  | 96.51 | 0.000 | 52  |
| Sample_YPC3.Cluster5558        | 98.65 | 1.006 | 11  |
| Sample_YPC3.Cluster1901cbin.1  | 96.38 | 0.170 | 67  |

|                                |        |       |     |
|--------------------------------|--------|-------|-----|
| Sample_YPC3.mb.47cbin.1        | 96.05  | 0.748 | 190 |
| Sample_YPC3.mb.3               | 99.22  | 0.000 | 11  |
| Sample_YPC3.mb.37cbin.1        | 89.10  | 2.404 | 285 |
| Sample_YPC3.Cluster19          | 99.53  | 0.153 | 37  |
| Sample_YPC3.Cluster1253        | 100.00 | 0.227 | 14  |
| Sample_YPC3.mb.19              | 93.50  | 1.469 | 27  |
| Sample_YPC3.mb.50              | 98.63  | 0.000 | 26  |
| Sample_YPC3.mb.45cbin.1        | 97.34  | 4.823 | 85  |
| Sample_YPC3.mb.23              | 91.53  | 3.375 | 305 |
| Sample_YPC3.Cluster3672cbin.1  | 99.61  | 1.858 | 59  |
| Sample_YPC3.mb.13cbin.1        | 98.14  | 0.836 | 44  |
| Sample_YPC4.Cluster7056        | 97.31  | 0.732 | 53  |
| Sample_YPC4.Cluster2418cbin.1  | 97.98  | 0.230 | 99  |
| Sample_YPC4.Cluster3903cbin.1  | 84.11  | 3.164 | 399 |
| Sample_YPC4.Cluster699         | 85.90  | 1.447 | 31  |
| Sample_YPC4.Cluster795cbin.1   | 95.74  | 1.006 | 127 |
| Sample_YPC4.Cluster448cbin.1   | 88.59  | 1.677 | 51  |
| Sample_YPC4.mb.52              | 88.40  | 3.752 | 246 |
| Sample_YPC4.mb.71cbin.1        | 85.82  | 1.565 | 313 |
| Sample_YPC4.mb.12cbin.1        | 94.95  | 0.000 | 80  |
| Sample_YPC4.Cluster4622cbin.1  | 98.88  | 0.231 | 47  |
| Sample_YPC4.mb.27              | 91.90  | 0.000 | 17  |
| Sample_YPC4.Cluster8779        | 96.97  | 0.000 | 18  |
| Sample_YPC4.Cluster8162        | 94.63  | 1.677 | 23  |
| Sample_YPC4.mb.65cbin.1        | 83.89  | 2.013 | 83  |
| Sample_YPC4.mb.30              | 100.00 | 0.961 | 64  |
| Sample_YPC4.mb.7cbin.1         | 94.96  | 4.138 | 51  |
| Sample_YPC4.mb.15cbin.1        | 94.42  | 0.671 | 66  |
| Sample_YPC4.Cluster8636cbin.1  | 98.65  | 1.006 | 150 |
| Sample_YPC4.mb.36cbin.1        | 94.57  | 2.585 | 164 |
| Sample_YPC4.mb.80              | 90.86  | 0.961 | 25  |
| Sample_YPC4.mb.35              | 88.39  | 1.864 | 578 |
| Sample_YPC4.mb.47cbin.1        | 94.73  | 1.754 | 68  |
| Sample_YPC4.mb.74cbin.1        | 97.09  | 2.210 | 138 |
| Sample_YPC4.Cluster4564cbin.1  | 97.66  | 3.411 | 227 |
| Sample_YPC4.mb.83cbin.1        | 97.39  | 1.486 | 46  |
| Sample_YPC4.mb.9cbin.1         | 99.42  | 0.512 | 43  |
| Sample_YPC5.Cluster10878       | 91.57  | 1.123 | 9   |
| Sample_YPC5.Cluster1749cbin.1  | 98.38  | 0.000 | 53  |
| Sample_YPC5.Cluster3557        | 92.93  | 1.342 | 26  |
| Sample_YPC5.mb.27cbin.1        | 98.65  | 0.000 | 12  |
| Sample_YPC5.Cluster10250cbin.1 | 99.32  | 1.677 | 44  |
| Sample_YPC5.Cluster149cbin.1   | 95.30  | 0.000 | 42  |
| Sample_YPC5.mb.56cbin.1        | 97.90  | 1.165 | 94  |
| Sample_YPC5.Cluster480cbin.1   | 92.61  | 2.013 | 49  |
| Sample_YPC5.Cluster11cbin.1    | 84.89  | 1.342 | 46  |
| Sample_YPC5.mb.31              | 90.77  | 1.174 | 104 |
| Sample_YPC5.mb.24              | 89.93  | 2.684 | 227 |
| Sample_YPC5.Cluster5474cbin.1  | 98.99  | 0.000 | 50  |
| Sample_YPC5.Cluster3768cbin.1  | 98.02  | 1.250 | 44  |
| Sample_YPC5.mb.38cbin.1        | 96.25  | 1.360 | 215 |
| Sample_YPC5.Cluster3cbin.1     | 89.73  | 0.898 | 292 |
| Sample_YPC5.Cluster12cbin.1    | 93.22  | 1.216 | 269 |
| Sample_YPC5.mb.3               | 99.51  | 4.214 | 74  |
| Sample_YPC5.mb.53              | 98.65  | 0.335 | 47  |
| Sample_YPC5.mb.36              | 98.65  | 0.964 | 34  |
| Sample_YPC5.mb.85              | 91.27  | 0.671 | 54  |
| Sample_YPC5.mb.51cbin.1        | 100.00 | 0.632 | 109 |



|                               |        |       |     |
|-------------------------------|--------|-------|-----|
| Sample_YPC5.mb.80             | 89.56  | 2.013 | 220 |
| Sample_YPC5.mb.37cbin.1       | 97.31  | 0.671 | 47  |
| Sample_YPC5.mb.25cbin.1       | 98.64  | 0.966 | 108 |
| Sample_YPC5.mb.69             | 99.03  | 0.747 | 38  |
| Sample_YPC5.Cluster7905cbin.1 | 97.66  | 0.974 | 49  |
| Sample_YPC5.mb.79cbin.1       | 97.27  | 0.671 | 28  |
| Sample_YPC5.mb.48             | 90.09  | 1.741 | 148 |
| Sample_YPC5.mb.84cbin.1       | 99.32  | 1.006 | 40  |
| Sample_YPC5.Cluster5166cbin.1 | 98.92  | 0.000 | 140 |
| Sample_YPC5.mb.62             | 86.74  | 0.000 | 104 |
| Sample_YPC5.Cluster2626       | 90.54  | 1.185 | 202 |
| Sample_YPC5.mb.73cbin.1       | 94.30  | 0.949 | 77  |
| Sample_YPC5.Cluster4418cbin.1 | 94.63  | 3.469 | 71  |
| Sample_YPC5.mb.70             | 99.03  | 0.384 | 57  |
| Sample_YPC6.Cluster7961       | 93.62  | 0.000 | 34  |
| Sample_YPC6.Cluster8978cbin.1 | 95.80  | 2.013 | 64  |
| Sample_YPC6.mb.26             | 86.57  | 2.013 | 38  |
| Sample_YPC6.Cluster445        | 86.57  | 2.318 | 68  |
| Sample_YPC6.Cluster10275      | 85.53  | 0.094 | 274 |
| Sample_YPC6.Cluster206        | 86.46  | 1.363 | 233 |
| Sample_YPC6.mb.44cbin.1       | 80.31  | 1.062 | 101 |
| Sample_YPC6.mb.66             | 93.30  | 2.237 | 179 |
| Sample_YPC6.mb.19cbin.1       | 89.86  | 1.251 | 264 |
| Sample_YPC6.mb.12             | 89.58  | 0.782 | 214 |
| Sample_YPC6.mb.69             | 85.23  | 0.167 | 110 |
| Sample_YPC6.mb.5              | 100.00 | 1.612 | 41  |
| Sample_YPC6.mb.21             | 88.74  | 2.742 | 352 |
| Sample_YPC6.Cluster4134cbin.1 | 87.47  | 2.013 | 22  |
| Sample_YPC6.mb.15             | 93.96  | 1.488 | 220 |
| Sample_YPC6.mb.56             | 98.87  | 0.721 | 157 |
| Sample_YPC6.mb.71             | 96.69  | 0.598 | 69  |
| Sample_YPC6.mb.67             | 98.53  | 0.584 | 75  |
| Sample_YPC6.Cluster781        | 98.31  | 0.667 | 27  |
| Sample_YPC6.mb.57cbin.1       | 91.08  | 0.738 | 145 |
| Sample_YPC6.mb.68cbin.1       | 97.84  | 0.000 | 149 |
| Sample_YPC6.mb.41             | 91.40  | 2.168 | 140 |
| Sample_YPC6.mb.42cbin.1       | 94.36  | 3.289 | 150 |
| Sample_YPC6.mb.50             | 99.42  | 0.000 | 57  |
| Sample_YPC6.mb.9              | 98.34  | 2.425 | 70  |
| Sample_YPC6.Cluster2250cbin.1 | 99.96  | 0.597 | 70  |
| Sample_YPC7.mb.15             | 83.40  | 1.573 | 331 |
| Sample_YPC7.mb.10             | 95.99  | 1.342 | 41  |
| Sample_YPC7.mb.23             | 91.27  | 0.000 | 45  |
| Sample_YPC7.Cluster3550cbin.1 | 98.32  | 0.671 | 36  |
| Sample_YPC7.mb.63             | 96.29  | 1.817 | 92  |
| Sample_YPC7.Cluster1606cbin.1 | 94.63  | 2.684 | 89  |
| Sample_YPC7.Cluster3409cbin.1 | 94.93  | 0.021 | 68  |
| Sample_YPC7.Cluster8892       | 98.65  | 0.000 | 20  |
| Sample_YPC7.Cluster3787cbin.1 | 93.91  | 0.000 | 19  |
| Sample_YPC7.mb.3              | 80.20  | 0.671 | 16  |
| Sample_YPC7.mb.81             | 99.10  | 1.342 | 132 |
| Sample_YPC7.Cluster7783cbin.1 | 82.86  | 2.818 | 458 |
| Sample_YPC7.mb.34cbin.1       | 99.03  | 0.961 | 31  |
| Sample_YPC7.mb.60cbin.1       | 98.07  | 0.000 | 156 |
| Sample_YPC7.mb.42             | 94.63  | 0.671 | 70  |
| Sample_YPC7.mb.78cbin.1       | 95.18  | 0.046 | 44  |
| Sample_YPC7.Cluster4349cbin.1 | 80.11  | 2.021 | 599 |
| Sample_YPC7.Cluster5553cbin.1 | 91.03  | 2.877 | 230 |

|                         |       |       |    |
|-------------------------|-------|-------|----|
| Sample_YPC7.mb.6cbin.1  | 98.24 | 0.877 | 71 |
| Sample_YPC7.mb.18cbin.1 | 95.90 | 0.464 | 43 |
| Sample_YPC7.Cluster5024 | 94.80 | 0.897 | 56 |
| Sample_YPC7.mb.27       | 98.10 | 0.593 | 91 |
| Sample_YPC7.mb.40       | 98.99 | 0.000 | 38 |

| MAG ID                          | GC content (%) | Checkm lineage     | N50 length (bp) | Genome size (Mbp) |
|---------------------------------|----------------|--------------------|-----------------|-------------------|
| Sample_LCA09.Cluster12306       | 26.00          | Bacteria           | 307090          | 1297850           |
| Sample_LCA09.Cluster1389cbin.1  | 53.10          | Clostridia         | 26776           | 1949356           |
| Sample_LCA09.Cluster103         | 61.90          | Clostridiales      | 49600           | 1588306           |
| Sample_LCA09.Cluster29cbin.1    | 61.10          | Clostridiales      | 8134            | 1657156           |
| Sample_LCA09.Cluster9849cbin.1  | 37.30          | Clostridiales      | 9043            | 2292989           |
| Sample_LCA09.Cluster3712cbin.1  | 48.10          | Clostridiales      | 80166           | 2883383           |
| Sample_LCA09.Cluster3578        | 45.80          | Clostridiales      | 128157          | 2234929           |
| Sample_LCA09.mb.109             | 32.40          | Clostridiales      | 44742           | 2847374           |
| Sample_LCA09.mb.101cbin.1       | 60.50          | Clostridiales      | 63120           | 2399601           |
| Sample_LCA09.Cluster1791        | 53.80          | Clostridiales      | 211691          | 1840564           |
| Sample_LCA09.mb.39cbin.1        | 54.00          | Clostridia         | 7362            | 1499545           |
| Sample_LCA09.mb.16cbin.1        | 38.20          | Clostridiales      | 50808           | 3483555           |
| Sample_LCA09.Cluster770cbin.1   | 60.00          | Bacteroidetes      | 10290           | 2578749           |
| Sample_LCA09.Cluster11946cbin.1 | 32.50          | Lactobacillales    | 129011          | 1843270           |
| Sample_LCA09.mb.10              | 56.30          | Clostridiales      | 16026           | 2354496           |
| Sample_LCA09.Cluster9301        | 40.90          | Clostridiales      | 236790          | 2054985           |
| Sample_LCA09.mb.2cbin.1         | 56.50          | Clostridiales      | 52298           | 2667750           |
| Sample_LCA09.Cluster11194cbin.1 | 37.30          | Clostridiales      | 100999          | 2756574           |
| Sample_LCA09.Cluster961         | 56.30          | Bifidobacteriaceae | 170022          | 2019947           |
| Sample_LCA09.mb.53cbin.1        | 49.70          | Clostridiales      | 85895           | 2240957           |
| Sample_LCA09.mb.127             | 60.60          | Clostridiales      | 45516           | 2199270           |
| Sample_LCA09.Cluster74cbin.1    | 59.60          | Bifidobacteriaceae | 97278           | 2687162           |
| Sample_LCA09.mb.73              | 38.30          | Clostridiales      | 22462           | 2645003           |
| Sample_LCA09.mb.103             | 43.40          | Lachnospiraceae    | 89187           | 2914268           |
| Sample_LCA09.mb.15cbin.1        | 51.30          | Clostridiales      | 199093          | 2301910           |
| Sample_LCA09.mb.45              | 49.00          | Lachnospiraceae    | 12270           | 2725822           |
| Sample_LCA09.mb.75              | 36.30          | Clostridiales      | 43467           | 2501757           |
| Sample_LCA09.mb.17cbin.1        | 42.70          | Clostridiales      | 131371          | 2671046           |
| Sample_LCA09.mb.106cbin.1       | 57.70          | Bacteroidetes      | 168890          | 3199532           |
| Sample_LCA09.mb.66              | 49.30          | Clostridiales      | 19751           | 2250645           |
| Sample_LCA09.mb.79              | 56.80          | Clostridiales      | 60652           | 2448695           |
| Sample_LCA09.mb.82cbin.1        | 57.00          | Clostridiales      | 68863           | 1850825           |
| Sample_LCA09.Cluster3917        | 44.70          | Bacteroidales      | 145171          | 3832313           |
| Sample_LCA09.mb.31cbin.1        | 40.50          | Clostridiales      | 107751          | 2708740           |
| Sample_LCA09.mb.99              | 62.30          | Clostridiales      | 25167           | 1865030           |
| Sample_LCA09.Cluster1997        | 45.30          | Bacteroidales      | 96728           | 3986714           |
| Sample_LCA09.mb.64              | 63.10          | Bifidobacteriaceae | 19209           | 2027732           |
| Sample_LCA09.Cluster2032        | 42.50          | Bacteria           | 26851           | 4304393           |
| Sample_LCA09.Cluster6035cbin.1  | 46.40          | Bacteroidales      | 100989          | 4169903           |
| Sample_LCA09.Cluster9790cbin.1  | 42.00          | Bacteroidales      | 70195           | 4494863           |
| Sample_LCA09.mb.86cbin.1        | 44.20          | Clostridiales      | 50440           | 3382098           |
| Sample_LCA09.mb.63              | 48.40          | Proteobacteria     | 16344           | 2629823           |
| Sample_LCA09.mb.98cbin.1        | 41.00          | Lachnospiraceae    | 74690           | 2961883           |
| Sample_LCA10.mb.27cbin.1        | 60.30          | Bacteria           | 11544           | 3762679           |
| Sample_LCA10.Cluster26cbin.1    | 60.40          | Clostridiales      | 8375            | 1986601           |
| Sample_LCA10.Cluster330cbin.1   | 58.80          | Clostridiales      | 25952           | 2158955           |
| Sample_LCA10.Cluster54          | 62.60          | Actinobacteria     | 268425          | 2307108           |
| Sample_LCA10.mb.10              | 59.30          | Clostridiales      | 128017          | 2184818           |
| Sample_LCA10.Cluster1853cbin.1  | 48.20          | Clostridiales      | 60223           | 2958549           |
| Sample_LCA10.Cluster2071cbin.1  | 46.60          | Lactobacillales    | 195396          | 2090005           |
| Sample_LCA10.Cluster140         | 60.80          | Clostridiales      | 182857          | 2755946           |
| Sample_LCA10.mb.18              | 55.60          | Clostridiales      | 91054           | 3241888           |
| Sample_LCA10.mb.32cbin.1        | 48.50          | Firmicutes         | 22954           | 1966836           |
| Sample_LCA10.mb.1               | 56.50          | Clostridiales      | 14201           | 2474162           |

|                                 |       |                    |        |         |
|---------------------------------|-------|--------------------|--------|---------|
| Sample_LCA10.Cluster1516cbin.1  | 51.30 | Clostridiales      | 239100 | 2100557 |
| Sample_LCA10.mb.60cbin.1        | 59.70 | Actinobacteria     | 93219  | 2118795 |
| Sample_LCA10.Cluster160cbin.1   | 59.20 | Clostridiales      | 14284  | 2829854 |
| Sample_LCA10.mb.51cbin.1        | 54.30 | Bacteroidetes      | 130663 | 2081513 |
| Sample_LCA10.mb.52              | 60.90 | Clostridiales      | 12936  | 2175482 |
| Sample_LCA10.mb.47              | 55.20 | Bacteroidetes      | 108862 | 2583108 |
| Sample_LCA10.Cluster63          | 62.90 | Bifidobacteriaceae | 138410 | 2104755 |
| Sample_LCA10.mb.55cbin.1        | 59.60 | Bifidobacteriaceae | 160525 | 2317362 |
| Sample_LCA10.Cluster332         | 58.20 | Bacteroidetes      | 221031 | 3115781 |
| Sample_LCA10.mb.39cbin.1        | 46.80 | Lachnospiraceae    | 78204  | 7052311 |
| Sample_LCA10.mb.37cbin.1        | 48.60 | Proteobacteria     | 19360  | 2447060 |
| Sample_LCA10.mb.44cbin.1        | 41.60 | Lachnospiraceae    | 70078  | 2627420 |
| Sample_LCA10.Cluster399         | 58.70 | Bacteroidetes      | 229350 | 3231323 |
| Sample_LCA10.Cluster2087        | 43.40 | Bacteria           | 22154  | 4010613 |
| Sample_LCA10.Cluster1830cbin.1  | 44.30 | Bacteria           | 24887  | 3703031 |
| Sample_LCA10.Cluster1398cbin.1  | 49.00 | Clostridiales      | 101968 | 7280753 |
| Sample_LCA10.mb.48              | 42.50 | Bacteroides        | 49674  | 3621940 |
| Sample_LCA10.Cluster2295cbin.1  | 44.90 | Bacteroidales      | 129300 | 4846684 |
| Sample_LCA10.mb.67              | 50.80 | Enterobacteriaceae | 108120 | 4434875 |
| Sample_LCA11.mb.110cbin.1       | 49.60 | Clostridia         | 118605 | 1816000 |
| Sample_LCA11.Cluster5845        | 48.80 | Bacteria           | 229795 | 2013212 |
| Sample_LCA11.Cluster295         | 60.60 | Clostridiales      | 73213  | 1847372 |
| Sample_LCA11.mb.27              | 47.20 | Clostridiales      | 32885  | 1903985 |
| Sample_LCA11.mb.4               | 26.70 | Bacteria           | 36824  | 1212042 |
| Sample_LCA11.Cluster7780cbin.1  | 47.70 | Selenomonadales    | 13236  | 1960234 |
| Sample_LCA11.Cluster4752        | 51.60 | Clostridiales      | 187499 | 1952555 |
| Sample_LCA11.Cluster10191       | 40.60 | Clostridiales      | 162611 | 2041317 |
| Sample_LCA11.Cluster7430        | 45.90 | Clostridiales      | 83788  | 1877021 |
| Sample_LCA11.Cluster11756cbin.1 | 37.80 | Clostridiales      | 157933 | 2041018 |
| Sample_LCA11.Cluster2198        | 55.60 | Bacteria           | 131844 | 2686888 |
| Sample_LCA11.Cluster12733cbin.1 | 28.90 | Bacteria           | 4800   | 1889081 |
| Sample_LCA11.mb.24cbin.1        | 59.90 | Clostridiales      | 53096  | 2237570 |
| Sample_LCA11.mb.113             | 58.20 | Bacteroidetes      | 188168 | 2636747 |
| Sample_LCA11.mb.22              | 53.90 | Clostridiales      | 8688   | 1783508 |
| Sample_LCA11.mb.74              | 26.10 | Bacteria           | 55004  | 1301627 |
| Sample_LCA11.Cluster9799cbin.1  | 41.00 | Lachnospiraceae    | 14826  | 2519852 |
| Sample_LCA11.Cluster13155       | 30.80 | Bacteria           | 81472  | 3612470 |
| Sample_LCA11.mb.37              | 56.60 | Clostridiales      | 13899  | 2171228 |
| Sample_LCA11.mb.39cbin.1        | 58.90 | Clostridiales      | 16363  | 2281390 |
| Sample_LCA11.mb.60cbin.1        | 61.80 | Clostridiales      | 12354  | 1551588 |
| Sample_LCA11.mb.88              | 27.10 | Clostridiales      | 154033 | 1727017 |
| Sample_LCA11.Cluster6942cbin.1  | 43.10 | Bacteria           | 11162  | 3800019 |
| Sample_LCA11.Cluster9181cbin.1  | 48.30 | Clostridiales      | 19990  | 6081383 |
| Sample_LCA11.mb.96              | 52.90 | Clostridiales      | 68512  | 2107163 |
| Sample_LCA11.mb.44              | 44.30 | Clostridiales      | 48598  | 2655388 |
| Sample_LCA11.Cluster6646        | 45.50 | Bacteroidales      | 124524 | 3896096 |
| Sample_LCA11.mb.62cbin.1        | 29.00 | Bacteria           | 17887  | 2340432 |
| Sample_LCA11.mb.89cbin.1        | 48.70 | Clostridiales      | 16146  | 2719951 |
| Sample_LCA11.mb.85cbin.1        | 54.90 | Clostridiales      | 68949  | 2354366 |
| Sample_LCA11.Cluster9182cbin.1  | 44.90 | Bacteroidales      | 77288  | 4729796 |
| Sample_LCA11.mb.29cbin.1        | 46.20 | Bacteroidales      | 89078  | 3342386 |
| Sample_LCA11.mb.105cbin.1       | 42.10 | Bacteroidales      | 117272 | 4499374 |
| Sample_LCA11.mb.81cbin.1        | 46.70 | Lachnospiraceae    | 149024 | 7356807 |
| Sample_LCA11.mb.55              | 46.70 | Bacteroidales      | 36464  | 3937491 |
| Sample_LCA11.Cluster4813cbin.1  | 50.50 | Enterobacteriaceae | 145958 | 4707519 |
| Sample_LCA11.mb.75              | 58.10 | Enterobacteriaceae | 25175  | 4717513 |
| Sample_LCA12.Cluster17512       | 28.60 | Bacteria           | 17065  | 1275895 |
| Sample_LCA12.Cluster10145       | 41.80 | Clostridiales      | 164661 | 2286271 |

|                                 |       |                     |        |         |
|---------------------------------|-------|---------------------|--------|---------|
| Sample_LCA12.Cluster16605       | 33.20 | Clostridiales       | 82171  | 2366103 |
| Sample_LCA12.Cluster6897cbin.1  | 48.10 | Clostridia          | 241705 | 2336834 |
| Sample_LCA12.mb.139cbin.1       | 27.50 | Bacteria            | 112841 | 1163787 |
| Sample_LCA12.mb.111             | 58.20 | Clostridiales       | 47864  | 2895916 |
| Sample_LCA12.mb.136             | 52.80 | Clostridia          | 83412  | 2179673 |
| Sample_LCA12.Cluster4404cbin.1  | 48.10 | Bacteroidales       | 88177  | 2475525 |
| Sample_LCA12.mb.3               | 26.30 | Bacteria            | 191038 | 1382881 |
| Sample_LCA12.Cluster12909       | 42.10 | Clostridiales       | 82411  | 1652494 |
| Sample_LCA12.Cluster3695cbin.1  | 54.20 | Bacteroidetes       | 90701  | 1937696 |
| Sample_LCA12.Cluster4266cbin.1  | 49.10 | Bacteroidales       | 139519 | 3062166 |
| Sample_LCA12.mb.116             | 59.00 | Clostridiales       | 31554  | 1955358 |
| Sample_LCA12.Cluster10369       | 44.60 | Clostridiales       | 199730 | 2177719 |
| Sample_LCA12.Cluster3601        | 53.90 | Clostridiales       | 176663 | 1833872 |
| Sample_LCA12.Cluster10cbin.1    | 62.90 | Proteobacteria      | 7693   | 1950421 |
| Sample_LCA12.Cluster4880cbin.1  | 51.30 | Clostridiales       | 121630 | 2075392 |
| Sample_LCA12.Cluster9314        | 45.00 | Clostridiales       | 83352  | 2530445 |
| Sample_LCA12.Cluster10866       | 44.40 | Clostridiales       | 151352 | 2654799 |
| Sample_LCA12.Cluster15          | 63.70 | Deltaproteobacteria | 49480  | 2628224 |
| Sample_LCA12.Cluster717         | 55.70 | Bacteria            | 43054  | 2690980 |
| Sample_LCA12.mb.49              | 45.90 | Clostridia          | 33744  | 1762286 |
| Sample_LCA12.mb.22              | 62.60 | Clostridiales       | 18334  | 1736297 |
| Sample_LCA12.mb.112             | 61.20 | Bacteroidetes       | 155090 | 2358159 |
| Sample_LCA12.Cluster13856cbin.1 | 38.20 | Lactobacillales     | 5940   | 2513520 |
| Sample_LCA12.mb.124cbin.1       | 56.40 | Clostridiales       | 11248  | 2530689 |
| Sample_LCA12.mb.129cbin.1       | 52.80 | Clostridiales       | 157064 | 2239211 |
| Sample_LCA12.mb.58cbin.1        | 50.70 | Bacteria            | 59013  | 1907398 |
| Sample_LCA12.mb.110             | 41.70 | Lachnospiraceae     | 59306  | 2524670 |
| Sample_LCA12.Cluster8154cbin.1  | 45.10 | Prevotella          | 60385  | 3526736 |
| Sample_LCA12.mb.43              | 57.50 | Clostridiales       | 36247  | 2217132 |
| Sample_LCA12.mb.52cbin.1        | 57.00 | Clostridiales       | 31326  | 2228072 |
| Sample_LCA12.mb.4               | 41.00 | Clostridiales       | 21378  | 2004160 |
| Sample_LCA12.Cluster7146cbin.1  | 43.20 | Bacteria            | 17760  | 3932565 |
| Sample_LCA12.mb.88              | 48.10 | Clostridiales       | 148678 | 1795438 |
| Sample_LCA12.mb.83              | 62.20 | Clostridiales       | 12735  | 1492049 |
| Sample_LCA12.mb.67              | 62.50 | Clostridiales       | 73397  | 1831950 |
| Sample_LCA12.mb.25cbin.1        | 42.40 | Lachnospiraceae     | 57085  | 2039443 |
| Sample_LCA12.mb.95              | 59.80 | Clostridiales       | 100173 | 2285778 |
| Sample_LCA12.mb.85              | 40.70 | Lachnospiraceae     | 93215  | 2695109 |
| Sample_LCA12.mb.65cbin.1        | 59.70 | Actinobacteria      | 59812  | 2280874 |
| Sample_LCA12.mb.34              | 46.00 | Bacteroidales       | 58721  | 2945807 |
| Sample_LCA12.mb.46              | 59.10 | Bacteroidetes       | 76230  | 2913989 |
| Sample_LCA12.mb.6               | 36.40 | Clostridiales       | 88264  | 2206289 |
| Sample_LCA12.mb.78              | 60.70 | Clostridiales       | 36425  | 2253940 |
| Sample_LCA12.mb.79cbin.1        | 55.70 | Bacteroidales       | 141886 | 3592439 |
| Sample_LCA12.mb.143             | 42.00 | Bacteroidales       | 18801  | 4398418 |
| Sample_LCA12.mb.76              | 41.40 | Clostridiales       | 60697  | 2529245 |
| Sample_LCA12.mb.97              | 57.30 | Bacteroidetes       | 95382  | 2505396 |
| Sample_LCA12.mb.69              | 43.30 | Lachnospiraceae     | 97628  | 2699250 |
| Sample_LCA12.Cluster3297cbin.1  | 51.00 | Enterobacteriaceae  | 27119  | 4520069 |
| Sample_LCA12.mb.42cbin.1        | 44.90 | Bacteroidales       | 50340  | 4541938 |
| Sample_LCA12.mb.47cbin.1        | 46.40 | Bacteroidales       | 69697  | 4458931 |
| Sample_LCA12.Cluster256cbin.1   | 57.80 | Enterobacteriaceae  | 75288  | 5000218 |
| Sample_LCA13.Cluster6321cbin.1  | 50.80 | Bacteria            | 76624  | 1848137 |
| Sample_LCA13.Cluster450cbin.1   | 60.60 | Clostridiales       | 52053  | 1664001 |
| Sample_LCA13.Cluster63cbin.1    | 61.10 | Clostridiales       | 74700  | 2025824 |
| Sample_LCA13.mb.105             | 41.40 | Clostridiales       | 12863  | 3264066 |
| Sample_LCA13.mb.14cbin.1        | 59.20 | Clostridiales       | 9266   | 1860171 |
| Sample_LCA13.Cluster97cbin.1    | 55.40 | Clostridiales       | 27797  | 2466539 |

|                                 |       |                     |        |         |
|---------------------------------|-------|---------------------|--------|---------|
| Sample_LCA13.Cluster5880        | 43.40 | Selenomonadales     | 44376  | 2070363 |
| Sample_LCA13.Cluster4024        | 53.70 | Clostridiales       | 377152 | 1815509 |
| Sample_LCA13.mb.118             | 56.50 | Clostridiales       | 30440  | 2235774 |
| Sample_LCA13.mb.110cbin.1       | 49.10 | Clostridiales       | 8210   | 2326675 |
| Sample_LCA13.mb.27              | 58.70 | Clostridiales       | 18009  | 2210827 |
| Sample_LCA13.Cluster11949       | 40.60 | Clostridiales       | 130176 | 2189581 |
| Sample_LCA13.Cluster5089cbin.1  | 51.90 | Clostridiales       | 146045 | 2324999 |
| Sample_LCA13.Cluster9916cbin.1  | 38.90 | Clostridiales       | 74183  | 2025650 |
| Sample_LCA13.Cluster28          | 63.40 | Deltaproteobacteria | 59484  | 2610584 |
| Sample_LCA13.mb.66              | 52.50 | Clostridiales       | 92526  | 2011949 |
| Sample_LCA13.mb.53              | 58.00 | Clostridiales       | 7968   | 1793227 |
| Sample_LCA13.mb.19              | 36.80 | Clostridiales       | 20277  | 1936163 |
| Sample_LCA13.Cluster10737       | 43.00 | Clostridiales       | 133120 | 2609339 |
| Sample_LCA13.Cluster57          | 59.90 | Bifidobacteriaceae  | 96684  | 2453599 |
| Sample_LCA13.mb.4               | 60.90 | Bacteroidetes       | 7343   | 2241181 |
| Sample_LCA13.mb.22cbin.1        | 60.20 | Bacteroidetes       | 31545  | 2564429 |
| Sample_LCA13.mb.36              | 31.10 | Euryarchaeota       | 29988  | 1702861 |
| Sample_LCA13.mb.61              | 59.70 | Clostridiales       | 95224  | 2300053 |
| Sample_LCA13.Cluster3740cbin.1  | 46.80 | Lachnospiraceae     | 46022  | 6960560 |
| Sample_LCA13.Cluster9471        | 41.50 | Lachnospiraceae     | 24830  | 2802619 |
| Sample_LCA13.mb.74              | 61.00 | Clostridiales       | 45853  | 1797423 |
| Sample_LCA13.mb.107             | 59.00 | Clostridiales       | 117217 | 3466009 |
| Sample_LCA13.mb.116             | 42.00 | Lachnospiraceae     | 87674  | 2373425 |
| Sample_LCA13.mb.86              | 49.90 | Clostridiales       | 79376  | 2312046 |
| Sample_LCA13.mb.63              | 56.10 | Clostridiales       | 13662  | 2502366 |
| Sample_LCA13.mb.109             | 43.50 | Bacteroidales       | 108213 | 3084042 |
| Sample_LCA13.mb.65              | 59.40 | Clostridiales       | 9461   | 2651022 |
| Sample_LCA13.mb.78              | 55.00 | Bacteroidetes       | 42977  | 2194853 |
| Sample_LCA13.mb.90cbin.1        | 60.90 | Clostridiales       | 21720  | 2102709 |
| Sample_LCA13.Cluster8570        | 45.20 | Bacteroidales       | 232237 | 4559494 |
| Sample_LCA13.Cluster12558cbin.1 | 42.40 | Bacteroides         | 80510  | 4701938 |
| Sample_LCA13.mb.102cbin.1       | 42.20 | Bacteroidales       | 46364  | 4744595 |
| Sample_LCA13.mb.44              | 45.60 | Bacteroidales       | 42712  | 3728042 |
| Sample_LCA13.mb.9cbin.1         | 43.50 | Bacteria            | 113950 | 4256297 |
| Sample_LCA13.mb.67              | 46.40 | Bacteroidales       | 307301 | 4149752 |
| Sample_LCA13.Cluster1780cbin.1  | 58.10 | Enterobacteriaceae  | 23795  | 4815174 |
| Sample_LCA13.mb.100cbin.1       | 50.50 | Enterobacteriaceae  | 38536  | 4683559 |
| Sample_LCA14.Cluster1346        | 51.80 | Clostridia          | 315366 | 2420397 |
| Sample_LCA14.Cluster2622        | 46.80 | Lactobacillales     | 150159 | 1954058 |
| Sample_LCA14.Cluster1004        | 52.00 | Clostridiales       | 120115 | 2467938 |
| Sample_LCA14.Cluster815cbin.1   | 60.20 | Clostridiales       | 56310  | 2744251 |
| Sample_LCA14.mb.51              | 61.00 | Clostridiales       | 144139 | 2625416 |
| Sample_LCA14.mb.61cbin.1        | 52.90 | Clostridiales       | 74728  | 2674257 |
| Sample_LCA14.Cluster4930        | 32.50 | Lactobacillales     | 64809  | 1868251 |
| Sample_LCA14.Cluster1036cbin.1  | 52.70 | Lactobacillales     | 48310  | 1806169 |
| Sample_LCA14.Cluster351cbin.1   | 53.50 | Selenomonadales     | 57206  | 2369171 |
| Sample_LCA14.Cluster5           | 60.60 | Bifidobacteriaceae  | 47737  | 2361672 |
| Sample_LCA14.mb.67              | 56.30 | Clostridiales       | 14644  | 2285865 |
| Sample_LCA14.mb.22              | 34.50 | Lactobacillus       | 466302 | 1854500 |
| Sample_LCA14.Cluster964cbin.1   | 60.30 | Deltaproteobacteria | 7328   | 3454812 |
| Sample_LCA14.Cluster308cbin.1   | 59.60 | Clostridiales       | 131226 | 2998515 |
| Sample_LCA14.mb.2               | 28.50 | Clostridiales       | 35100  | 2901726 |
| Sample_LCA14.mb.26              | 42.20 | Bacteroidales       | 49411  | 3199134 |
| Sample_LCA14.Cluster362         | 58.30 | Bacteroidetes       | 344837 | 3208383 |
| Sample_LCA14.mb.14              | 41.80 | Lachnospiraceae     | 80509  | 2414167 |
| Sample_LCA14.Cluster1967cbin.1  | 48.50 | Bacteroidales       | 204138 | 3636460 |
| Sample_LCA14.mb.15cbin.1        | 46.40 | Bacteroidales       | 247651 | 4180831 |
| Sample_LCA14.mb.65cbin.1        | 45.10 | Bacteroidales       | 32695  | 4623266 |

|                                |       |                    |        |         |
|--------------------------------|-------|--------------------|--------|---------|
| Sample_LCA14.mb.12             | 51.20 | Enterobacteriaceae | 9508   | 3946154 |
| Sample_LCA14.mb.60             | 49.60 | Clostridiales      | 356694 | 5833480 |
| Sample_LCA15.mb.47             | 46.90 | Bacteria           | 48229  | 1735257 |
| Sample_LCA15.mb.39cbin.1       | 33.70 | Clostridiales      | 12093  | 1986017 |
| Sample_LCA15.mb.46             | 34.20 | Clostridiales      | 118508 | 2394224 |
| Sample_LCA15.Cluster1357cbin.1 | 47.80 | Clostridiales      | 84848  | 2938475 |
| Sample_LCA15.mb.24             | 48.80 | Clostridiales      | 56135  | 2615047 |
| Sample_LCA15.mb.53cbin.1       | 60.80 | Clostridiales      | 7004   | 2119043 |
| Sample_LCA15.mb.12             | 53.80 | Clostridiales      | 515830 | 1893267 |
| Sample_LCA15.Cluster1569       | 43.60 | Selenomonadales    | 60270  | 2282753 |
| Sample_LCA15.mb.20cbin.1       | 56.40 | Clostridiales      | 12350  | 2516885 |
| Sample_LCA15.Cluster3639       | 41.00 | Clostridiales      | 220948 | 2061917 |
| Sample_LCA15.Cluster2898cbin.1 | 44.10 | Clostridiales      | 9655   | 2928115 |
| Sample_LCA15.Cluster41cbin.1   | 60.10 | Bifidobacteriaceae | 8655   | 2001023 |
| Sample_LCA15.mb.1              | 59.60 | Clostridiales      | 26698  | 1929194 |
| Sample_LCA15.mb.45cbin.1       | 57.10 | Bifidobacteriaceae | 118203 | 2108691 |
| Sample_LCA15.Cluster5216cbin.1 | 36.00 | Clostridiales      | 170919 | 2513618 |
| Sample_LCA15.mb.18cbin.1       | 44.90 | Clostridiales      | 38201  | 2667273 |
| Sample_LCA15.Cluster3291       | 41.30 | Lachnospiraceae    | 90085  | 2786023 |
| Sample_LCA15.mb.48             | 41.40 | Clostridiales      | 48047  | 2947049 |
| Sample_LCA15.mb.69             | 38.50 | Lactobacillales    | 41938  | 2398456 |
| Sample_LCA15.mb.59             | 42.80 | Lachnospiraceae    | 99764  | 3115405 |
| Sample_LCA15.Cluster1253cbin.1 | 46.10 | Bacteroidales      | 82134  | 3466384 |
| Sample_LCA15.mb.33             | 46.60 | Bacteroidales      | 44479  | 4161622 |
| Sample_LCA15.Cluster753cbin.1  | 41.90 | Bacteroidales      | 42908  | 4693259 |
| Sample_LCA15.mb.61cbin.1       | 50.60 | Enterobacteriaceae | 154695 | 4550922 |
| Sample_LCA15.Cluster35         | 56.20 | Enterobacteriaceae | 199776 | 5279330 |
| Sample_LCA16.Cluster2110       | 50.60 | Bacteria           | 55100  | 1961387 |
| Sample_LCA16.mb.26             | 49.50 | Clostridiales      | 73213  | 2002805 |
| Sample_LCA16.mb.32cbin.1       | 58.00 | Clostridiales      | 36613  | 3080636 |
| Sample_LCA16.Cluster1219       | 52.20 | Bacteria           | 16887  | 4205078 |
| Sample_LCA16.Cluster252cbin.1  | 59.90 | Bacteria           | 102925 | 5033228 |
| Sample_LCA16.mb.13             | 47.00 | Lachnospiraceae    | 70409  | 2618940 |
| Sample_LCA16.Cluster6403cbin.1 | 41.00 | Clostridiales      | 11162  | 1899318 |
| Sample_LCA16.mb.56             | 49.60 | Clostridiales      | 36811  | 2243930 |
| Sample_LCA16.Cluster7169       | 37.60 | Clostridiales      | 156298 | 2032362 |
| Sample_LCA16.mb.14cbin.1       | 44.80 | Clostridiales      | 11448  | 2314447 |
| Sample_LCA16.mb.29             | 59.50 | Bifidobacteriaceae | 37758  | 2054274 |
| Sample_LCA16.mb.61             | 53.40 | Clostridiales      | 141702 | 1909501 |
| Sample_LCA16.mb.75cbin.1       | 45.40 | Bacteroidales      | 97628  | 3422065 |
| Sample_LCA16.mb.6              | 41.10 | Clostridiales      | 206911 | 2642502 |
| Sample_LCA16.Cluster2784cbin.1 | 43.40 | Bacteria           | 5384   | 3277998 |
| Sample_LCA16.Cluster4602       | 43.40 | Bacteroidales      | 148215 | 3081283 |
| Sample_LCA16.Cluster3983cbin.1 | 48.10 | Bacteroidales      | 229250 | 3433431 |
| Sample_LCA16.Cluster7377       | 37.50 | Lactobacillales    | 177811 | 2720356 |
| Sample_LCA16.mb.9cbin.1        | 41.20 | Lachnospiraceae    | 68635  | 2946017 |
| Sample_LCA16.Cluster3119cbin.1 | 42.50 | Bacteria           | 14575  | 4066686 |
| Sample_LCA16.mb.12cbin.1       | 45.20 | Bacteroidales      | 8208   | 3882001 |
| Sample_LCA16.Cluster777cbin.1  | 50.70 | Enterobacteriaceae | 80004  | 4667295 |
| Sample_LCA16.mb.1cbin.1        | 57.40 | Enterobacteriaceae | 184092 | 5228175 |
| Sample_LCA17.mb.41cbin.1       | 46.00 | Bacteria           | 31069  | 1736000 |
| Sample_LCA17.mb.49             | 49.70 | Clostridiales      | 8391   | 1634387 |
| Sample_LCA17.Cluster8456cbin.1 | 41.40 | Clostridiales      | 43180  | 2612981 |
| Sample_LCA17.Cluster550cbin.1  | 60.10 | Clostridiales      | 54511  | 2524012 |
| Sample_LCA17.Cluster3336cbin.1 | 50.30 | Bacteroidales      | 15100  | 2478899 |
| Sample_LCA17.Cluster2742cbin.1 | 48.30 | Firmicutes         | 32847  | 1646286 |
| Sample_LCA17.Cluster8642cbin.1 | 40.30 | Clostridiales      | 145770 | 1591401 |
| Sample_LCA17.mb.88             | 26.60 | Bacteria           | 89492  | 1501098 |

|                                 |       |                    |        |         |
|---------------------------------|-------|--------------------|--------|---------|
| Sample_LCA17.mb.70              | 58.40 | Clostridiales      | 45025  | 2773052 |
| Sample_LCA17.mb.62cbin.1        | 59.60 | Clostridiales      | 6924   | 1606809 |
| Sample_LCA17.mb.56cbin.1        | 61.90 | Clostridiales      | 12644  | 1920023 |
| Sample_LCA17.Cluster10970cbin.1 | 27.40 | Clostridiales      | 7331   | 2590572 |
| Sample_LCA17.mb.60cbin.1        | 60.50 | Clostridiales      | 82074  | 1876779 |
| Sample_LCA17.mb.46              | 58.60 | Bacteroidetes      | 6406   | 2382627 |
| Sample_LCA17.mb.96              | 53.00 | Clostridia         | 81079  | 2075418 |
| Sample_LCA17.mb.22cbin.1        | 60.00 | Bifidobacteriaceae | 16880  | 1967919 |
| Sample_LCA17.mb.38cbin.1        | 60.10 | Bacteroidetes      | 89590  | 2501919 |
| Sample_LCA17.Cluster49cbin.1    | 56.00 | Proteobacteria     | 5471   | 2084612 |
| Sample_LCA17.mb.54cbin.1        | 46.00 | Lachnospiraceae    | 75552  | 3073746 |
| Sample_LCA17.mb.58              | 46.30 | Bacteroidetes      | 40711  | 2330341 |
| Sample_LCA17.Cluster8124cbin.1  | 40.90 | Lachnospiraceae    | 54813  | 3279331 |
| Sample_LCA17.Cluster8958cbin.1  | 38.30 | Bacteroidales      | 28195  | 3398350 |
| Sample_LCA17.mb.61              | 50.30 | Bacteroidales      | 103715 | 2194329 |
| Sample_LCA17.mb.24              | 41.30 | Bacteroidales      | 90369  | 2957054 |
| Sample_LCA17.mb.76cbin.1        | 56.30 | Bacteroidales      | 61169  | 3396025 |
| Sample_LCA17.mb.79cbin.1        | 36.50 | Clostridiales      | 9829   | 1751122 |
| Sample_LCA17.mb.73              | 58.00 | Clostridiales      | 63919  | 2505567 |
| Sample_LCA17.mb.97              | 60.20 | Actinobacteria     | 8692   | 1847576 |
| Sample_LCA17.mb.80              | 38.50 | Clostridiales      | 81777  | 2140376 |
| Sample_LCA17.mb.94              | 54.70 | Bacteroidetes      | 79177  | 2083594 |
| Sample_LCA17.mb.9               | 51.40 | Clostridiales      | 187481 | 2183630 |
| Sample_LCA17.mb.50cbin.1        | 43.50 | Bacteria           | 38380  | 3935825 |
| Sample_LCA17.mb.74cbin.1        | 47.50 | Bacteroidales      | 35908  | 3718630 |
| Sample_LCA17.mb.3cbin.1         | 45.20 | Bacteroidales      | 25852  | 4212481 |
| Sample_LCA17.mb.40              | 45.50 | Bacteroidales      | 25959  | 4249297 |
| Sample_LCA17.Cluster534cbin.1   | 51.60 | Enterobacteriaceae | 5787   | 3394643 |
| Sample_LCA19.Cluster6802cbin.1  | 26.40 | Bacteria           | 8623   | 1011539 |
| Sample_LCA19.Cluster1769cbin.1  | 46.30 | Bacteria           | 46448  | 1864065 |
| Sample_LCA19.Cluster1748        | 47.60 | Clostridiales      | 99248  | 2562977 |
| Sample_LCA19.mb.77cbin.1        | 61.60 | Clostridiales      | 102253 | 1955215 |
| Sample_LCA19.Cluster1073        | 53.60 | Clostridiales      | 615950 | 1817354 |
| Sample_LCA19.Cluster674cbin.1   | 54.30 | Bacteroidetes      | 117549 | 2152854 |
| Sample_LCA19.mb.41cbin.1        | 60.60 | Bacteroidetes      | 7226   | 2267390 |
| Sample_LCA19.mb.50cbin.1        | 63.70 | Actinobacteria     | 7941   | 2279656 |
| Sample_LCA19.Cluster4112        | 41.00 | Clostridiales      | 195885 | 2060029 |
| Sample_LCA19.Cluster201cbin.1   | 56.20 | Clostridiales      | 14025  | 2518399 |
| Sample_LCA19.Cluster314cbin.1   | 56.20 | Proteobacteria     | 10121  | 1852691 |
| Sample_LCA19.mb.60              | 48.90 | Clostridiales      | 59921  | 2569957 |
| Sample_LCA19.mb.88              | 59.80 | Clostridiales      | 21622  | 1971250 |
| Sample_LCA19.Cluster6064        | 35.90 | Clostridiales      | 199977 | 2507362 |
| Sample_LCA19.mb.39cbin.1        | 57.20 | Bifidobacteriaceae | 116936 | 2161893 |
| Sample_LCA19.Cluster4036cbin.1  | 40.80 | Lachnospiraceae    | 79906  | 3052510 |
| Sample_LCA19.mb.75cbin.1        | 59.00 | Clostridiales      | 39040  | 2233593 |
| Sample_LCA19.mb.85              | 42.70 | Clostridiales      | 37165  | 2571650 |
| Sample_LCA19.mb.47              | 42.10 | Bacteroidales      | 64312  | 3339053 |
| Sample_LCA19.mb.58cbin.1        | 44.50 | Clostridiales      | 29315  | 3063021 |
| Sample_LCA19.mb.48              | 38.30 | Lactobacillales    | 24981  | 2602845 |
| Sample_LCA19.Cluster1508        | 46.50 | Bacteroidales      | 87048  | 3054431 |
| Sample_LCA19.mb.52              | 42.00 | Bacteroides        | 31066  | 4546916 |
| Sample_LCA19.mb.23cbin.1        | 45.20 | Bacteroidales      | 13810  | 4237696 |
| Sample_LCA19.mb.36              | 56.10 | Enterobacteriaceae | 209812 | 5468709 |
| Sample_LCA20.mb.10cbin.1        | 29.30 | Bacteria           | 130412 | 1123297 |
| Sample_LCA20.mb.30              | 26.00 | Bacteria           | 85357  | 1395082 |
| Sample_LCA20.mb.57              | 26.40 | Bacteria           | 127272 | 1205898 |
| Sample_LCA20.Cluster427cbin.1   | 58.30 | Clostridiales      | 48223  | 2809631 |
| Sample_LCA20.mb.34cbin.1        | 46.10 | Clostridiales      | 85333  | 2160390 |



|                                |       |                     |        |         |
|--------------------------------|-------|---------------------|--------|---------|
| Sample_LCA20.mb.12             | 37.50 | Clostridiales       | 174249 | 2340351 |
| Sample_LCA20.Cluster408        | 58.50 | Clostridiales       | 26731  | 1612848 |
| Sample_LCA20.mb.104            | 61.70 | Clostridiales       | 34543  | 1909025 |
| Sample_LCA20.Cluster1109cbin.1 | 54.90 | Clostridiales       | 37053  | 2361746 |
| Sample_LCA20.mb.59             | 44.60 | Clostridiales       | 13291  | 2406005 |
| Sample_LCA20.Cluster2172cbin.1 | 50.00 | Clostridiales       | 122574 | 2325557 |
| Sample_LCA20.Cluster6765       | 40.60 | Clostridiales       | 135599 | 1918207 |
| Sample_LCA20.Cluster8336cbin.1 | 37.20 | Clostridiales       | 121907 | 1832603 |
| Sample_LCA20.Cluster5171       | 44.50 | Clostridiales       | 152858 | 1852628 |
| Sample_LCA20.mb.1cbin.1        | 56.10 | Clostridiales       | 15886  | 2464978 |
| Sample_LCA20.mb.6cbin.1        | 61.70 | Clostridiales       | 196102 | 1961348 |
| Sample_LCA20.mb.36             | 46.60 | Clostridiales       | 12439  | 1999408 |
| Sample_LCA20.Cluster6794cbin.1 | 40.50 | Clostridiales       | 183998 | 2177345 |
| Sample_LCA20.Cluster2547       | 51.60 | Clostridiales       | 179445 | 2319810 |
| Sample_LCA20.mb.43             | 54.90 | Bacteroidetes       | 123145 | 2206642 |
| Sample_LCA20.mb.44cbin.1       | 48.90 | Bacteroidales       | 167034 | 3169219 |
| Sample_LCA20.Cluster133cbin.1  | 59.30 | Bacteroidetes       | 69064  | 2850377 |
| Sample_LCA20.mb.13             | 37.60 | Clostridiales       | 114021 | 2492697 |
| Sample_LCA20.mb.7              | 50.90 | Prevotella          | 67928  | 2318866 |
| Sample_LCA20.mb.75cbin.1       | 31.10 | Euryarchaeota       | 58487  | 1759703 |
| Sample_LCA20.mb.98             | 48.50 | Lachnospiraceae     | 9930   | 3242367 |
| Sample_LCA20.mb.102            | 43.40 | Bacteroidales       | 259581 | 3164479 |
| Sample_LCA20.mb.56             | 47.80 | Bacteroidales       | 25620  | 3134597 |
| Sample_LCA20.mb.66cbin.1       | 42.70 | Bacteria            | 7395   | 3766753 |
| Sample_LCA20.Cluster4859cbin.1 | 45.90 | Bacteroidales       | 17462  | 4320175 |
| Sample_LCA20.Cluster2539cbin.1 | 50.80 | Enterobacteriaceae  | 147476 | 4515762 |
| Sample_LCA20.mb.55             | 57.70 | Enterobacteriaceae  | 229737 | 5042511 |
| Sample_LCA21.mb.26cbin.1       | 53.80 | Clostridia          | 30625  | 1677810 |
| Sample_LCA21.mb.108            | 59.60 | Clostridiales       | 7456   | 1728628 |
| Sample_LCA21.Cluster3243cbin.1 | 50.50 | Bacteroidales       | 66438  | 2208584 |
| Sample_LCA21.Cluster461cbin.1  | 58.40 | Clostridiales       | 42765  | 2597859 |
| Sample_LCA21.mb.35             | 61.20 | Clostridiales       | 62278  | 1789857 |
| Sample_LCA21.mb.10             | 49.30 | Clostridiales       | 18874  | 2324659 |
| Sample_LCA21.Cluster4740       | 49.00 | Clostridiales       | 68609  | 2624558 |
| Sample_LCA21.Cluster3612cbin.1 | 48.40 | Firmicutes          | 32127  | 1839914 |
| Sample_LCA21.Cluster4672cbin.1 | 43.80 | Selenomonadales     | 57914  | 2197014 |
| Sample_LCA21.mb.79             | 49.60 | Clostridiales       | 92394  | 1945536 |
| Sample_LCA21.mb.12             | 40.80 | Clostridiales       | 69515  | 2041587 |
| Sample_LCA21.mb.51             | 41.20 | Lachnospiraceae     | 109996 | 2507014 |
| Sample_LCA21.mb.107            | 44.60 | Clostridiales       | 101660 | 2187399 |
| Sample_LCA21.mb.13             | 43.10 | Clostridiales       | 43020  | 3157133 |
| Sample_LCA21.mb.88cbin.1       | 33.30 | Clostridiales       | 44913  | 2039849 |
| Sample_LCA21.Cluster4089cbin.1 | 49.80 | Lachnospiraceae     | 80397  | 2716028 |
| Sample_LCA21.mb.71cbin.1       | 45.20 | Clostridiales       | 7085   | 2139055 |
| Sample_LCA21.mb.61cbin.1       | 51.50 | Clostridiales       | 148149 | 2109813 |
| Sample_LCA21.mb.93             | 34.10 | Bacteria            | 30984  | 1857694 |
| Sample_LCA21.mb.103cbin.1      | 31.50 | Firmicutes          | 57810  | 2223166 |
| Sample_LCA21.mb.59cbin.1       | 44.50 | Clostridiales       | 37630  | 2611635 |
| Sample_LCA21.mb.98             | 61.70 | Clostridiales       | 81345  | 2344361 |
| Sample_LCA21.mb.21             | 48.40 | Proteobacteria      | 63977  | 2619985 |
| Sample_LCA21.mb.9              | 44.50 | Lachnospiraceae     | 129588 | 3050140 |
| Sample_LCA21.mb.17cbin.1       | 46.10 | Bacteroidales       | 38780  | 3362423 |
| Sample_LCA21.mb.66cbin.1       | 58.40 | Bacteroidetes       | 114712 | 3168142 |
| Sample_LCA21.mb.95cbin.1       | 40.90 | Lachnospiraceae     | 12854  | 2407295 |
| Sample_LCA21.mb.90             | 62.40 | Deltaproteobacteria | 30767  | 3715508 |
| Sample_LCA21.mb.99cbin.1       | 41.20 | Lachnospiraceae     | 97675  | 2855975 |
| Sample_LCA21.mb.112cbin.1      | 45.30 | Bacteroidales       | 50425  | 4587977 |
| Sample_LCA21.mb.69             | 45.60 | Bacteroidales       | 30137  | 3720874 |

|                                |       |                    |        |         |
|--------------------------------|-------|--------------------|--------|---------|
| Sample_LCA21.mb.67cbin.1       | 47.30 | Bacteroidales      | 16274  | 3905429 |
| Sample_LCA21.Cluster5531cbin.1 | 50.70 | Enterobacteriaceae | 31254  | 4857403 |
| Sample_LCA22.Cluster2200       | 50.80 | Bacteria           | 99385  | 1838011 |
| Sample_LCA22.mb.26             | 26.80 | Bacteria           | 22864  | 1303836 |
| Sample_LCA22.Cluster2096cbin.1 | 48.60 | Clostridiales      | 18132  | 2923885 |
| Sample_LCA22.Cluster321        | 58.30 | Clostridiales      | 66639  | 2325620 |
| Sample_LCA22.mb.21             | 58.70 | Clostridiales      | 29407  | 2017010 |
| Sample_LCA22.Cluster251        | 59.50 | Actinobacteria     | 111982 | 2249989 |
| Sample_LCA22.mb.29             | 61.10 | Clostridiales      | 75294  | 2088623 |
| Sample_LCA22.Cluster3338       | 47.30 | Selenomonadales    | 84326  | 2122412 |
| Sample_LCA22.Cluster5574       | 41.50 | Clostridiales      | 351088 | 1777278 |
| Sample_LCA22.mb.79             | 32.80 | Bacteria           | 88065  | 1940528 |
| Sample_LCA22.Cluster227        | 55.40 | Bacteria           | 189963 | 2722398 |
| Sample_LCA22.mb.74             | 41.30 | Clostridiales      | 5721   | 2481202 |
| Sample_LCA22.mb.93             | 49.40 | Clostridia         | 20541  | 1843339 |
| Sample_LCA22.Cluster274cbin.1  | 56.70 | Bifidobacteriaceae | 39951  | 1996484 |
| Sample_LCA22.mb.73             | 61.10 | Clostridiales      | 105350 | 1676789 |
| Sample_LCA22.Cluster119cbin.1  | 61.60 | Proteobacteria     | 42240  | 2479948 |
| Sample_LCA22.mb.58cbin.1       | 49.80 | Clostridiales      | 23370  | 2231879 |
| Sample_LCA22.mb.20cbin.1       | 36.10 | Clostridiales      | 127923 | 2056400 |
| Sample_LCA22.mb.92             | 58.10 | Clostridiales      | 14369  | 3040378 |
| Sample_LCA22.mb.45             | 46.80 | Lachnospiraceae    | 56476  | 2695178 |
| Sample_LCA22.mb.36cbin.1       | 38.50 | Clostridiales      | 71575  | 2229222 |
| Sample_LCA22.mb.81cbin.1       | 54.90 | Bacteroidetes      | 34363  | 1951292 |
| Sample_LCA22.mb.44             | 43.60 | Lachnospiraceae    | 97263  | 2714393 |
| Sample_LCA22.Cluster5426cbin.1 | 42.10 | Bacteroidales      | 63074  | 3439543 |
| Sample_LCA22.Cluster8517cbin.1 | 40.70 | Lachnospiraceae    | 77574  | 3259047 |
| Sample_LCA22.mb.77             | 41.30 | Clostridiales      | 264913 | 2432238 |
| Sample_LCA22.Cluster3734cbin.1 | 42.90 | Bacteria           | 28244  | 4229709 |
| Sample_LCA22.mb.51             | 41.70 | Clostridiales      | 17364  | 3093716 |
| Sample_LCA22.mb.33cbin.1       | 45.10 | Bacteroidales      | 89660  | 4245767 |
| Sample_LCA22.mb.22cbin.1       | 44.40 | Bacteroidales      | 44520  | 4896396 |
| Sample_LCA22.mb.91cbin.1       | 41.90 | Bacteroidales      | 32217  | 3964990 |
| Sample_LCA22.mb.15cbin.1       | 50.60 | Enterobacteriaceae | 172256 | 4912829 |
| Sample_LCA23.mb.29cbin.1       | 47.10 | Clostridiales      | 8500   | 2323921 |
| Sample_LCA23.mb.11cbin.1       | 60.30 | Clostridiales      | 38639  | 1887666 |
| Sample_LCA23.Cluster2542       | 51.50 | Bacteroidales      | 74542  | 2091827 |
| Sample_LCA23.Cluster263        | 59.80 | Actinobacteria     | 135893 | 2158730 |
| Sample_LCA23.mb.33cbin.1       | 41.30 | Lachnospiraceae    | 17399  | 2363288 |
| Sample_LCA23.Cluster3080cbin.1 | 47.40 | Selenomonadales    | 27805  | 2068676 |
| Sample_LCA23.mb.28             | 49.30 | Clostridiales      | 25696  | 2415462 |
| Sample_LCA23.mb.54             | 58.70 | Clostridiales      | 66717  | 1984022 |
| Sample_LCA23.Cluster406        | 55.90 | Bacteria           | 13657  | 2383098 |
| Sample_LCA23.Cluster8070       | 40.80 | Clostridiales      | 143216 | 2089678 |
| Sample_LCA23.mb.59             | 61.30 | Clostridiales      | 11404  | 2589026 |
| Sample_LCA23.Cluster213cbin.1  | 54.30 | Selenomonadales    | 7917   | 1796248 |
| Sample_LCA23.Cluster5816cbin.1 | 44.30 | Clostridiales      | 153618 | 2732737 |
| Sample_LCA23.mb.53             | 54.50 | Bacteroidetes      | 109550 | 2132464 |
| Sample_LCA23.Cluster5538cbin.1 | 44.70 | Clostridiales      | 74103  | 3103907 |
| Sample_LCA23.Cluster8409cbin.1 | 41.30 | Lachnospiraceae    | 55650  | 3115096 |
| Sample_LCA23.mb.67cbin.1       | 38.10 | Clostridiales      | 180426 | 2029457 |
| Sample_LCA23.mb.68             | 59.90 | Bacteroidetes      | 21195  | 2725323 |
| Sample_LCA23.Cluster3820cbin.1 | 43.10 | Lachnospiraceae    | 35901  | 3106836 |
| Sample_LCA23.Cluster4195cbin.1 | 43.00 | Bacteria           | 5943   | 3248282 |
| Sample_LCA23.mb.86             | 51.70 | Clostridiales      | 10738  | 1917687 |
| Sample_LCA23.mb.4cbin.1        | 63.10 | Proteobacteria     | 47402  | 2609997 |
| Sample_LCA23.mb.70cbin.1       | 50.00 | Bacteroidales      | 64787  | 2430984 |
| Sample_LCA23.mb.30             | 40.70 | Lachnospiraceae    | 74307  | 3540843 |

|                                |       |                    |        |         |
|--------------------------------|-------|--------------------|--------|---------|
| Sample_LCA23.mb.84             | 43.80 | Lachnospiraceae    | 101065 | 2789227 |
| Sample_LCA23.mb.76cbin.1       | 56.90 | Clostridiales      | 13853  | 2221188 |
| Sample_LCA23.Cluster6963cbin.1 | 45.10 | Bacteroidales      | 20576  | 4282279 |
| Sample_LCA23.mb.74cbin.1       | 48.60 | Bacteroidales      | 21205  | 3495794 |
| Sample_LCA23.mb.40cbin.1       | 45.40 | Bacteroidales      | 83842  | 4151708 |
| Sample_LCA23.mb.85cbin.1       | 50.80 | Enterobacteriaceae | 39745  | 4761826 |
| Sample_LCA24.mb.24             | 57.80 | Bacteria           | 31735  | 2182854 |
| Sample_LCA24.Cluster446cbin.1  | 51.30 | Clostridiales      | 9882   | 2191261 |
| Sample_LCA24.mb.16             | 60.00 | Actinobacteria     | 28139  | 2163928 |
| Sample_LCA24.Cluster4405cbin.1 | 34.80 | Lactobacillus      | 5853   | 1478843 |
| Sample_LCA24.Cluster1988cbin.1 | 44.70 | Clostridiales      | 187577 | 2038269 |
| Sample_LCA24.mb.42cbin.1       | 48.40 | Firmicutes         | 27661  | 2104943 |
| Sample_LCA24.mb.25             | 60.60 | Bacteroidetes      | 29931  | 2415045 |
| Sample_LCA24.mb.38cbin.1       | 56.70 | Bifidobacteriaceae | 27343  | 1837304 |
| Sample_LCA24.Cluster4798       | 32.50 | Lactobacillales    | 141595 | 1866162 |
| Sample_LCA24.mb.40             | 60.00 | Bifidobacteriaceae | 154633 | 2195294 |
| Sample_LCA24.Cluster11         | 62.70 | Proteobacteria     | 37047  | 2265850 |
| Sample_LCA24.mb.55             | 54.00 | Selenomonadales    | 78560  | 2226660 |
| Sample_LCA24.mb.9              | 63.30 | Bifidobacteriaceae | 24565  | 2152688 |
| Sample_LCA24.mb.19             | 59.40 | Bacteroidetes      | 153647 | 2761017 |
| Sample_LCA24.mb.20             | 46.20 | Bacteroidales      | 31201  | 2839222 |
| Sample_LCA24.Cluster1580cbin.1 | 46.60 | Bacteroidales      | 97433  | 2850581 |
| Sample_LCA24.mb.33cbin.1       | 41.10 | Lachnospiraceae    | 97677  | 3112422 |
| Sample_LCA24.mb.7              | 46.40 | Bacteroidales      | 111975 | 3577876 |
| Sample_LCA25.mb.50             | 38.10 | Clostridiales      | 258770 | 1850740 |
| Sample_LCA25.mb.8              | 49.50 | Clostridiales      | 8517   | 2139410 |
| Sample_LCA25.mb.20             | 40.90 | Clostridiales      | 189416 | 2094720 |
| Sample_LCA25.Cluster2783       | 43.30 | Selenomonadales    | 133146 | 2487308 |
| Sample_LCA25.mb.15             | 60.10 | Bacteroidetes      | 24675  | 2618771 |
| Sample_LCA25.mb.7              | 54.90 | Bacteroidetes      | 134900 | 2059803 |
| Sample_LCA25.Cluster326cbin.1  | 58.00 | Clostridiales      | 33428  | 2018387 |
| Sample_LCA25.mb.19cbin.1       | 43.70 | Bacteroidales      | 5946   | 2240942 |
| Sample_LCA25.mb.35cbin.1       | 60.30 | Bifidobacteriaceae | 27386  | 2349596 |
| Sample_LCA25.Cluster1744cbin.1 | 45.80 | Bacteroidales      | 78136  | 2793951 |
| Sample_LCA25.Cluster3706cbin.1 | 40.70 | Lachnospiraceae    | 61081  | 3123884 |
| Sample_LCA25.Cluster6469       | 29.00 | Bacteria           | 72623  | 2595685 |
| Sample_LCA25.mb.6cbin.1        | 45.20 | Prevotella         | 33414  | 3152665 |
| Sample_LCA25.Cluster2442cbin.1 | 41.20 | Lachnospiraceae    | 56801  | 3598065 |
| Sample_LCA25.mb.18cbin.1       | 31.10 | Firmicutes         | 55154  | 2507571 |
| Sample_LCA25.mb.26             | 42.70 | Lachnospiraceae    | 90930  | 3565096 |
| Sample_LCA25.Cluster1321cbin.1 | 45.30 | Bacteroidales      | 6276   | 3624736 |
| Sample_LCA25.Cluster192        | 51.00 | Enterobacteriaceae | 74263  | 4390086 |
| Sample_LCB09.Cluster10320      | 26.00 | Bacteria           | 307090 | 1297737 |
| Sample_LCB09.mb.33             | 53.60 | Clostridia         | 37615  | 1775449 |
| Sample_LCB09.Cluster9274cbin.1 | 36.60 | Clostridiales      | 8646   | 2163829 |
| Sample_LCB09.mb.34             | 49.50 | Clostridiales      | 94043  | 1925495 |
| Sample_LCB09.mb.22             | 32.40 | Clostridiales      | 44233  | 2587276 |
| Sample_LCB09.mb.57             | 42.60 | Bacteria           | 70105  | 5626329 |
| Sample_LCB09.Cluster2908cbin.1 | 45.60 | Clostridiales      | 132839 | 2530943 |
| Sample_LCB09.mb.19cbin.1       | 59.30 | Clostridiales      | 14461  | 1811227 |
| Sample_LCB09.Cluster66cbin.1   | 60.80 | Clostridiales      | 43751  | 2103093 |
| Sample_LCB09.mb.46cbin.1       | 48.80 | Lachnospiraceae    | 13957  | 2828857 |
| Sample_LCB09.Cluster1827       | 51.40 | Clostridiales      | 192362 | 1976424 |
| Sample_LCB09.mb.58cbin.1       | 56.60 | Clostridiales      | 71450  | 2374753 |
| Sample_LCB09.Cluster7974       | 40.90 | Clostridiales      | 189620 | 2050523 |
| Sample_LCB09.mb.49cbin.1       | 48.10 | Clostridiales      | 26410  | 3042865 |
| Sample_LCB09.Cluster9335       | 32.70 | Lactobacillales    | 6420   | 1577210 |
| Sample_LCB09.mb.78             | 53.00 | Clostridia         | 58824  | 2012740 |

|                                |       |                    |        |         |
|--------------------------------|-------|--------------------|--------|---------|
| Sample_LCB09.mb.65cbin.1       | 56.10 | Clostridiales      | 55327  | 2462172 |
| Sample_LCB09.Cluster862cbin.1  | 56.30 | Bifidobacteriaceae | 182411 | 1951049 |
| Sample_LCB09.mb.31cbin.1       | 55.90 | Bacteria           | 12655  | 2523314 |
| Sample_LCB09.mb.70             | 62.30 | Clostridiales      | 30052  | 1811966 |
| Sample_LCB09.mb.42cbin.1       | 60.10 | Bacteroidetes      | 29908  | 2682553 |
| Sample_LCB09.mb.69cbin.1       | 60.90 | Clostridiales      | 54550  | 2250639 |
| Sample_LCB09.mb.18             | 37.50 | Clostridiales      | 74231  | 2657586 |
| Sample_LCB09.mb.90             | 38.40 | Clostridiales      | 8437   | 2116082 |
| Sample_LCB09.mb.2              | 42.10 | Lachnospiraceae    | 9529   | 1997489 |
| Sample_LCB09.mb.54             | 43.40 | Lachnospiraceae    | 103337 | 3026272 |
| Sample_LCB09.Cluster6670cbin.1 | 41.10 | Lachnospiraceae    | 72932  | 2937043 |
| Sample_LCB09.mb.6              | 56.00 | Clostridiales      | 16026  | 2519081 |
| Sample_LCB09.Cluster345cbin.1  | 58.80 | Bacteroidetes      | 178167 | 3015535 |
| Sample_LCB09.mb.67             | 60.00 | Bifidobacteriaceae | 39226  | 2153638 |
| Sample_LCB09.mb.82cbin.1       | 53.70 | Clostridiales      | 173633 | 1865409 |
| Sample_LCB09.Cluster3531       | 44.60 | Bacteroidales      | 141285 | 3709233 |
| Sample_LCB09.mb.73cbin.1       | 42.60 | Clostridiales      | 141995 | 2725376 |
| Sample_LCB09.Cluster3297cbin.1 | 46.40 | Bacteroidales      | 95333  | 4136645 |
| Sample_LCB09.mb.50cbin.1       | 45.40 | Bacteroidales      | 97398  | 3997817 |
| Sample_LCB09.mb.51cbin.1       | 42.00 | Bacteroidales      | 71779  | 4617739 |
| Sample_LCB10.Cluster10459      | 26.00 | Bacteria           | 307090 | 1298260 |
| Sample_LCB10.mb.100            | 47.20 | Clostridiales      | 53662  | 2127013 |
| Sample_LCB10.Cluster43cbin.1   | 62.30 | Clostridiales      | 5531   | 1400468 |
| Sample_LCB10.mb.113            | 38.20 | Clostridiales      | 35584  | 2464144 |
| Sample_LCB10.mb.30             | 52.90 | Clostridia         | 71323  | 2104461 |
| Sample_LCB10.mb.20             | 32.30 | Clostridiales      | 110739 | 2543044 |
| Sample_LCB10.Cluster2571cbin.1 | 46.40 | Clostridiales      | 37217  | 2202117 |
| Sample_LCB10.mb.104cbin.1      | 56.30 | Clostridiales      | 58104  | 2689000 |
| Sample_LCB10.Cluster2169cbin.1 | 48.50 | Firmicutes         | 28032  | 1789506 |
| Sample_LCB10.Cluster49         | 63.00 | Bifidobacteriaceae | 99063  | 2163667 |
| Sample_LCB10.mb.71             | 49.50 | Clostridiales      | 27490  | 1893512 |
| Sample_LCB10.mb.8              | 55.30 | Bacteria           | 10392  | 3304093 |
| Sample_LCB10.mb.58             | 42.30 | Lachnospiraceae    | 12221  | 1807304 |
| Sample_LCB10.Cluster7878       | 40.80 | Clostridiales      | 236790 | 2026761 |
| Sample_LCB10.Cluster362        | 55.60 | Bacteria           | 126621 | 2617114 |
| Sample_LCB10.mb.120cbin.1      | 45.40 | Firmicutes         | 54195  | 1722237 |
| Sample_LCB10.mb.106            | 56.50 | Clostridiales      | 15321  | 2322218 |
| Sample_LCB10.Cluster2330cbin.1 | 51.20 | Clostridiales      | 205067 | 2276375 |
| Sample_LCB10.Cluster10213      | 32.50 | Lactobacillales    | 128914 | 1837067 |
| Sample_LCB10.mb.11             | 53.70 | Clostridiales      | 328209 | 1884200 |
| Sample_LCB10.mb.19cbin.1       | 61.00 | Clostridiales      | 15722  | 2146847 |
| Sample_LCB10.Cluster1270cbin.1 | 56.20 | Bifidobacteriaceae | 110243 | 2017484 |
| Sample_LCB10.mb.31cbin.1       | 44.00 | Selenomonadales    | 10333  | 2145461 |
| Sample_LCB10.mb.67             | 48.20 | Clostridiales      | 59365  | 2950446 |
| Sample_LCB10.mb.63cbin.1       | 60.70 | Clostridiales      | 58114  | 2393225 |
| Sample_LCB10.Cluster7401cbin.1 | 37.50 | Clostridiales      | 82932  | 2577894 |
| Sample_LCB10.mb.89             | 53.70 | Clostridia         | 35989  | 1767338 |
| Sample_LCB10.mb.52             | 59.20 | Clostridiales      | 15607  | 2092853 |
| Sample_LCB10.Cluster2199cbin.1 | 49.70 | Lachnospiraceae    | 27878  | 2827088 |
| Sample_LCB10.mb.40cbin.1       | 59.70 | Bacteroidetes      | 38488  | 2806601 |
| Sample_LCB10.Cluster5231cbin.1 | 40.90 | Lachnospiraceae    | 68758  | 3006117 |
| Sample_LCB10.mb.82cbin.1       | 56.40 | Clostridiales      | 66421  | 2714390 |
| Sample_LCB10.mb.44cbin.1       | 49.80 | Lactobacillales    | 44896  | 2078042 |
| Sample_LCB10.mb.116cbin.1      | 48.80 | Proteobacteria     | 17046  | 2558575 |
| Sample_LCB10.mb.81             | 60.70 | Clostridiales      | 23636  | 1957311 |
| Sample_LCB10.Cluster3344       | 44.60 | Bacteroidales      | 151809 | 3746935 |
| Sample_LCB10.Cluster5766cbin.1 | 42.30 | Bacteria           | 9772   | 4137586 |
| Sample_LCB10.Cluster2061       | 45.30 | Bacteroidales      | 93516  | 4000781 |

|                                 |       |                     |        |         |
|---------------------------------|-------|---------------------|--------|---------|
| Sample_LCB10.mb.93              | 44.30 | Clostridiales       | 74576  | 2428757 |
| Sample_LCB10.mb.97cbin.1        | 42.80 | Clostridiales       | 142866 | 2671497 |
| Sample_LCB10.mb.99              | 58.70 | Bacteroidetes       | 204738 | 3024655 |
| Sample_LCB10.mb.75              | 46.70 | Bacteroidales       | 101862 | 3819916 |
| Sample_LCB10.mb.61cbin.1        | 41.80 | Bacteroidales       | 71779  | 4652857 |
| Sample_LCB11.mb.22cbin.1        | 26.10 | Bacteria            | 17703  | 1242595 |
| Sample_LCB11.Cluster4735        | 49.50 | Clostridiales       | 91341  | 1948685 |
| Sample_LCB11.mb.57cbin.1        | 62.00 | Bacteria            | 10247  | 1743991 |
| Sample_LCB11.Cluster68          | 61.10 | Clostridiales       | 18052  | 1606199 |
| Sample_LCB11.mb.30              | 58.20 | Clostridia          | 38810  | 2921045 |
| Sample_LCB11.Cluster4219cbin.1  | 48.80 | Clostridiales       | 12411  | 2690878 |
| Sample_LCB11.Cluster626cbin.1   | 59.70 | Clostridiales       | 42128  | 2216460 |
| Sample_LCB11.mb.51              | 47.20 | Clostridiales       | 10772  | 1851486 |
| Sample_LCB11.mb.34              | 61.50 | Clostridiales       | 53113  | 1631854 |
| Sample_LCB11.mb.62              | 53.20 | Clostridia          | 68512  | 2053361 |
| Sample_LCB11.mb.36cbin.1        | 56.90 | Clostridiales       | 63765  | 1922675 |
| Sample_LCB11.mb.55              | 48.70 | Bacteria            | 116918 | 2088177 |
| Sample_LCB11.mb.45              | 58.40 | Clostridiales       | 59772  | 1788916 |
| Sample_LCB11.mb.47              | 38.10 | Clostridiales       | 59098  | 3365754 |
| Sample_LCB11.Cluster9145cbin.1  | 37.90 | Clostridiales       | 149552 | 1983936 |
| Sample_LCB11.Cluster802         | 59.70 | Bifidobacteriaceae  | 179302 | 2114414 |
| Sample_LCB11.Cluster1742        | 55.60 | Bacteria            | 128893 | 2679939 |
| Sample_LCB11.Cluster7542cbin.1  | 44.20 | Clostridiales       | 64046  | 2739724 |
| Sample_LCB11.mb.52              | 56.10 | Clostridiales       | 95040  | 2513893 |
| Sample_LCB11.mb.19cbin.1        | 45.30 | Clostridiales       | 65268  | 2414135 |
| Sample_LCB11.mb.35cbin.1        | 40.50 | Clostridiales       | 162494 | 2128193 |
| Sample_LCB11.Cluster7794cbin.1  | 41.60 | Lachnospiraceae     | 7349   | 2461158 |
| Sample_LCB11.mb.77cbin.1        | 62.10 | Clostridiales       | 14512  | 2036481 |
| Sample_LCB11.mb.63              | 57.90 | Bacteroidetes       | 133506 | 2790653 |
| Sample_LCB11.mb.17              | 46.80 | Bacteroidales       | 27325  | 3708846 |
| Sample_LCB11.Cluster6984cbin.1  | 44.90 | Bacteroidales       | 14388  | 4377683 |
| Sample_LCB11.Cluster5870cbin.1  | 45.10 | Bacteroidales       | 107840 | 4232888 |
| Sample_LCB11.mb.32              | 42.00 | Bacteroidales       | 113553 | 4210973 |
| Sample_LCB11.mb.29              | 57.90 | Enterobacteriaceae  | 93910  | 4940037 |
| Sample_LCB12.Cluster2504cbin.1  | 52.20 | Clostridiales       | 76446  | 2091320 |
| Sample_LCB12.Cluster6052cbin.1  | 48.30 | Clostridia          | 158541 | 2297352 |
| Sample_LCB12.mb.110             | 26.30 | Bacteria            | 131102 | 1407850 |
| Sample_LCB12.Cluster14970cbin.1 | 41.30 | Clostridiales       | 176224 | 2500852 |
| Sample_LCB12.Cluster30          | 62.30 | Clostridiales       | 13011  | 1311691 |
| Sample_LCB12.mb.1               | 53.10 | Clostridia          | 71650  | 2012453 |
| Sample_LCB12.mb.30              | 51.60 | Bacteria            | 10582  | 1567984 |
| Sample_LCB12.mb.42              | 27.70 | Bacteria            | 131488 | 1084035 |
| Sample_LCB12.mb.16              | 49.60 | Clostridiales       | 71437  | 1950006 |
| Sample_LCB12.mb.113cbin.1       | 33.30 | Clostridiales       | 119398 | 2533994 |
| Sample_LCB12.mb.116cbin.1       | 57.40 | Clostridiales       | 32131  | 2220605 |
| Sample_LCB12.Cluster8572cbin.1  | 45.00 | Clostridiales       | 83352  | 2614980 |
| Sample_LCB12.Cluster347cbin.1   | 56.00 | Bacteroidales       | 108844 | 3440613 |
| Sample_LCB12.mb.125cbin.1       | 60.30 | Clostridiales       | 87352  | 2002063 |
| Sample_LCB12.Cluster6           | 63.90 | Deltaproteobacteria | 16570  | 2468008 |
| Sample_LCB12.mb.13cbin.1        | 48.30 | Bacteroidales       | 59154  | 2310386 |
| Sample_LCB12.Cluster3428cbin.1  | 52.80 | Clostridiales       | 120267 | 2357917 |
| Sample_LCB12.Cluster725         | 56.00 | Bacteria            | 41801  | 2572337 |
| Sample_LCB12.Cluster10251cbin.1 | 43.50 | Lachnospiraceae     | 96861  | 2744737 |
| Sample_LCB12.Cluster11873cbin.1 | 45.10 | Prevotella          | 56411  | 3628262 |
| Sample_LCB12.mb.124             | 36.50 | Clostridiales       | 40762  | 2103985 |
| Sample_LCB12.mb.105cbin.1       | 43.80 | Clostridiales       | 315184 | 3011416 |
| Sample_LCB12.Cluster13525cbin.1 | 38.10 | Lactobacillales     | 6983   | 2488958 |
| Sample_LCB12.mb.91              | 48.50 | Clostridiales       | 39048  | 1735007 |

|                                 |       |                     |        |         |
|---------------------------------|-------|---------------------|--------|---------|
| Sample_LCB12.mb.37              | 42.10 | Clostridiales       | 36863  | 1841485 |
| Sample_LCB12.mb.101             | 59.30 | Bacteroidetes       | 16201  | 2861244 |
| Sample_LCB12.mb.90              | 60.00 | Clostridiales       | 79945  | 2021180 |
| Sample_LCB12.mb.45              | 60.30 | Bacteroidetes       | 39132  | 2515045 |
| Sample_LCB12.mb.8               | 58.10 | Clostridiales       | 53790  | 1906019 |
| Sample_LCB12.mb.55cbin.1        | 55.90 | Clostridiales       | 11991  | 2530225 |
| Sample_LCB12.mb.54              | 41.40 | Clostridiales       | 46499  | 2579403 |
| Sample_LCB12.mb.75              | 59.70 | Actinobacteria      | 70866  | 2250432 |
| Sample_LCB12.mb.77              | 53.70 | Clostridiales       | 279343 | 1735675 |
| Sample_LCB12.mb.92              | 40.90 | Lachnospiraceae     | 103068 | 2455204 |
| Sample_LCB12.Cluster6103        | 46.70 | Bacteroidales       | 62543  | 3863695 |
| Sample_LCB12.mb.32              | 42.00 | Lachnospiraceae     | 58958  | 2320027 |
| Sample_LCB12.mb.93              | 41.50 | Clostridiales       | 7972   | 1546095 |
| Sample_LCB12.mb.82              | 60.90 | Clostridiales       | 23934  | 2168548 |
| Sample_LCB12.mb.80cbin.1        | 57.60 | Bacteroidetes       | 11938  | 2310799 |
| Sample_LCB12.mb.7cbin.1         | 44.60 | Clostridiales       | 139814 | 2138707 |
| Sample_LCB12.mb.94cbin.1        | 48.70 | Firmicutes          | 32848  | 1982379 |
| Sample_LCB12.mb.95              | 46.90 | Clostridiales       | 11316  | 1983263 |
| Sample_LCB12.mb.86cbin.1        | 60.90 | Bacteroidetes       | 155152 | 2427678 |
| Sample_LCB12.mb.56cbin.1        | 40.20 | Lachnospiraceae     | 70071  | 3412427 |
| Sample_LCB12.mb.25              | 41.90 | Bacteroidales       | 26493  | 4680058 |
| Sample_LCB12.mb.74              | 45.50 | Bacteroidales       | 18820  | 4027950 |
| Sample_LCB12.mb.136cbin.1       | 50.70 | Enterobacteriaceae  | 26256  | 4457077 |
| Sample_LCB12.mb.33cbin.1        | 58.10 | Enterobacteriaceae  | 24234  | 4854239 |
| Sample_LCB13.Cluster4317cbin.1  | 50.70 | Bacteria            | 58980  | 1888374 |
| Sample_LCB13.Cluster6252cbin.1  | 49.50 | Clostridiales       | 90647  | 1990980 |
| Sample_LCB13.mb.110             | 53.60 | Clostridia          | 15763  | 1710994 |
| Sample_LCB13.mb.12              | 47.20 | Clostridiales       | 13541  | 1855355 |
| Sample_LCB13.Cluster228         | 60.70 | Clostridiales       | 57989  | 1696363 |
| Sample_LCB13.Cluster308cbin.1   | 61.30 | Clostridiales       | 54375  | 1933443 |
| Sample_LCB13.Cluster7562cbin.1  | 45.00 | Clostridiales       | 14917  | 2400484 |
| Sample_LCB13.mb.18cbin.1        | 59.70 | Clostridiales       | 7615   | 1646051 |
| Sample_LCB13.Cluster12208       | 38.60 | Clostridiales       | 82967  | 1789517 |
| Sample_LCB13.Cluster567cbin.1   | 60.00 | Actinobacteria      | 70038  | 2210634 |
| Sample_LCB13.Cluster3631        | 53.70 | Clostridiales       | 337983 | 1824115 |
| Sample_LCB13.Cluster11305cbin.1 | 40.70 | Clostridiales       | 183566 | 2017719 |
| Sample_LCB13.mb.70              | 26.70 | Bacteria            | 64180  | 1181145 |
| Sample_LCB13.Cluster799cbin.1   | 60.60 | Clostridiales       | 45819  | 2294248 |
| Sample_LCB13.mb.111cbin.1       | 56.70 | Bacteroidales       | 14956  | 3106676 |
| Sample_LCB13.Cluster219cbin.1   | 60.30 | Bacteroidetes       | 42814  | 2619010 |
| Sample_LCB13.mb.112             | 31.00 | Euryarchaeota       | 57131  | 1732112 |
| Sample_LCB13.mb.41              | 60.80 | Clostridiales       | 55708  | 1816751 |
| Sample_LCB13.mb.105cbin.1       | 43.50 | Selenomonadales     | 54179  | 2509414 |
| Sample_LCB13.mb.46              | 57.70 | Clostridiales       | 7580   | 2024998 |
| Sample_LCB13.Cluster10074cbin.1 | 38.50 | Bacteroidales       | 5868   | 2782614 |
| Sample_LCB13.mb.27              | 55.00 | Bacteroidetes       | 34087  | 2150200 |
| Sample_LCB13.mb.68              | 59.60 | Clostridiales       | 101035 | 2315623 |
| Sample_LCB13.mb.72              | 62.00 | Clostridiales       | 7962   | 1547102 |
| Sample_LCB13.mb.71              | 57.30 | Clostridiales       | 30489  | 2002002 |
| Sample_LCB13.mb.34cbin.1        | 63.80 | Deltaproteobacteria | 31232  | 2525313 |
| Sample_LCB13.mb.15              | 41.90 | Lachnospiraceae     | 75294  | 2360135 |
| Sample_LCB13.mb.31              | 41.80 | Lachnospiraceae     | 95148  | 2709216 |
| Sample_LCB13.mb.19              | 43.50 | Bacteroidales       | 141035 | 2902859 |
| Sample_LCB13.mb.83              | 60.70 | Clostridiales       | 75324  | 2302065 |
| Sample_LCB13.Cluster7062        | 43.10 | Bacteria            | 108883 | 4129107 |
| Sample_LCB13.mb.98              | 41.20 | Clostridiales       | 56421  | 3776850 |
| Sample_LCB13.mb.28              | 44.50 | Bacteroidales       | 62383  | 3163495 |
| Sample_LCB13.mb.69              | 41.00 | Lachnospiraceae     | 19834  | 2469929 |

|                                |       |                     |        |         |
|--------------------------------|-------|---------------------|--------|---------|
| Sample_LCB13.mb.80             | 59.30 | Clostridiales       | 98360  | 3295648 |
| Sample_LCB13.mb.9cbin.1        | 42.60 | Clostridiales       | 100011 | 2860547 |
| Sample_LCB13.mb.36cbin.1       | 46.30 | Bacteroidales       | 262056 | 4259680 |
| Sample_LCB13.mb.43             | 45.20 | Bacteroidales       | 217776 | 4361685 |
| Sample_LCB13.mb.60             | 45.60 | Bacteroidales       | 44700  | 3815209 |
| Sample_LCB13.Cluster5307cbin.1 | 50.40 | Enterobacteriaceae  | 43643  | 4826282 |
| Sample_LCB13.Cluster5606cbin.1 | 57.70 | Enterobacteriaceae  | 44262  | 5079241 |
| Sample_LCB14.mb.6              | 51.80 | Clostridia          | 315384 | 2412630 |
| Sample_LCB14.Cluster696        | 51.70 | Clostridiales       | 118493 | 2267074 |
| Sample_LCB14.mb.43             | 52.90 | Clostridiales       | 72329  | 2617531 |
| Sample_LCB14.Cluster2207       | 46.80 | Lactobacillales     | 177687 | 1927263 |
| Sample_LCB14.mb.45             | 59.60 | Clostridiales       | 12617  | 2815818 |
| Sample_LCB14.Cluster11cbin.1   | 60.80 | Clostridiales       | 109607 | 2815778 |
| Sample_LCB14.Cluster1090cbin.1 | 43.90 | Selenomonadales     | 6458   | 2013519 |
| Sample_LCB14.mb.4cbin.1        | 56.10 | Clostridiales       | 15682  | 2487239 |
| Sample_LCB14.mb.63cbin.1       | 59.40 | Clostridiales       | 109885 | 3388768 |
| Sample_LCB14.Cluster704cbin.1  | 52.70 | Lactobacillales     | 47368  | 1791918 |
| Sample_LCB14.mb.5              | 34.50 | Lactobacillus       | 509541 | 1861641 |
| Sample_LCB14.Cluster16cbin.1   | 58.10 | Clostridiales       | 20583  | 1976410 |
| Sample_LCB14.Cluster238cbin.1  | 53.50 | Selenomonadales     | 51780  | 2354398 |
| Sample_LCB14.mb.46cbin.1       | 32.50 | Lactobacillales     | 96019  | 1917722 |
| Sample_LCB14.mb.55             | 60.60 | Deltaproteobacteria | 5707   | 2960029 |
| Sample_LCB14.mb.65             | 59.50 | Clostridiales       | 100212 | 2902613 |
| Sample_LCB14.Cluster4494       | 28.40 | Clostridiales       | 187541 | 2831525 |
| Sample_LCB14.mb.52cbin.1       | 62.20 | Clostridiales       | 13506  | 3326801 |
| Sample_LCB14.Cluster247        | 58.40 | Bacteroidetes       | 225227 | 3257202 |
| Sample_LCB14.mb.36             | 42.10 | Bacteroidales       | 49411  | 3314977 |
| Sample_LCB14.mb.21cbin.1       | 41.60 | Lachnospiraceae     | 80703  | 2618513 |
| Sample_LCB14.Cluster1916cbin.1 | 44.20 | Bacteroidales       | 81857  | 3453759 |
| Sample_LCB14.Cluster1757       | 48.40 | Bacteroidales       | 258263 | 3574511 |
| Sample_LCB14.mb.3              | 46.60 | Bacteroidales       | 574066 | 3709064 |
| Sample_LCB14.Cluster2653cbin.1 | 42.10 | Bacteroides         | 56444  | 4028634 |
| Sample_LCB14.Cluster2742cbin.1 | 45.10 | Bacteroidales       | 50010  | 4689736 |
| Sample_LCB14.mb.50             | 49.90 | Clostridiales       | 307763 | 5401245 |
| Sample_LCB14.mb.25cbin.1       | 55.80 | Enterobacteriaceae  | 47018  | 4360100 |
| Sample_LCB14.mb.37             | 50.90 | Enterobacteriaceae  | 20080  | 4414609 |
| Sample_LCB15.mb.1              | 47.00 | Bacteria            | 53881  | 1685149 |
| Sample_LCB15.mb.32             | 33.90 | Clostridiales       | 6875   | 2735238 |
| Sample_LCB15.mb.3cbin.1        | 54.80 | Bacteroidetes       | 159168 | 1897191 |
| Sample_LCB15.mb.28             | 60.60 | Bacteroidetes       | 11623  | 2336809 |
| Sample_LCB15.mb.48cbin.1       | 56.70 | Clostridiales       | 8995   | 2325982 |
| Sample_LCB15.mb.50cbin.1       | 41.00 | Clostridiales       | 27598  | 1926388 |
| Sample_LCB15.mb.24cbin.1       | 59.70 | Clostridiales       | 30207  | 2003998 |
| Sample_LCB15.mb.20cbin.1       | 56.70 | Bifidobacteriaceae  | 24743  | 2034516 |
| Sample_LCB15.mb.23cbin.1       | 50.00 | Proteobacteria      | 7803   | 1650611 |
| Sample_LCB15.mb.18cbin.1       | 36.20 | Clostridiales       | 14450  | 2325985 |
| Sample_LCB15.mb.43             | 41.50 | Lachnospiraceae     | 100999 | 2481902 |
| Sample_LCB15.Cluster42cbin.1   | 57.60 | Clostridiales       | 32968  | 2331672 |
| Sample_LCB15.mb.33             | 41.60 | Lachnospiraceae     | 17990  | 3566843 |
| Sample_LCB15.Cluster1020       | 46.10 | Bacteroidales       | 81797  | 3390329 |
| Sample_LCB15.mb.31             | 46.90 | Bacteroidales       | 29301  | 3863960 |
| Sample_LCB15.mb.49cbin.1       | 41.40 | Bacteroidales       | 38985  | 4655238 |
| Sample_LCB15.mb.17cbin.1       | 50.60 | Enterobacteriaceae  | 141132 | 4248244 |
| Sample_LCB15.mb.34cbin.1       | 56.10 | Enterobacteriaceae  | 199617 | 5336353 |
| Sample_LCB16.mb.50cbin.1       | 47.80 | Bacteria            | 6346   | 1366974 |
| Sample_LCB16.mb.28             | 49.50 | Clostridiales       | 10731  | 2134180 |
| Sample_LCB16.mb.41cbin.1       | 63.90 | Actinobacteria      | 7457   | 2230848 |
| Sample_LCB16.Cluster692cbin.1  | 54.40 | Bacteroidetes       | 122659 | 2148788 |

|                                 |       |                     |        |         |
|---------------------------------|-------|---------------------|--------|---------|
| Sample_LCB16.Cluster819         | 43.50 | Selenomonadales     | 46875  | 2278652 |
| Sample_LCB16.Cluster2885        | 40.90 | Clostridiales       | 166491 | 2029087 |
| Sample_LCB16.mb.54              | 60.60 | Clostridiales       | 50263  | 2181584 |
| Sample_LCB16.Cluster43          | 60.00 | Bifidobacteriaceae  | 11036  | 1981749 |
| Sample_LCB16.mb.57              | 44.30 | Clostridiales       | 10573  | 2769812 |
| Sample_LCB16.mb.66cbin.1        | 56.30 | Clostridiales       | 15170  | 2543339 |
| Sample_LCB16.mb.14              | 43.20 | Lachnospiraceae     | 89121  | 2921827 |
| Sample_LCB16.Cluster4450cbin.1  | 35.90 | Clostridiales       | 203446 | 2641093 |
| Sample_LCB16.Cluster4274cbin.1  | 41.10 | Lachnospiraceae     | 68533  | 2941270 |
| Sample_LCB16.mb.64cbin.1        | 58.60 | Clostridiales       | 32196  | 2273536 |
| Sample_LCB16.mb.5cbin.1         | 42.10 | Bacteroidales       | 13123  | 3531065 |
| Sample_LCB16.mb.26cbin.1        | 56.10 | Enterobacteriaceae  | 224240 | 5506077 |
| Sample_LCB17.Cluster2017        | 52.00 | Bacteria            | 7148   | 1493616 |
| Sample_LCB17.Cluster12880cbin.1 | 36.50 | Clostridiales       | 198573 | 1846484 |
| Sample_LCB17.Cluster11076cbin.1 | 38.20 | Clostridiales       | 13376  | 2745120 |
| Sample_LCB17.mb.100             | 45.70 | Bacteria            | 74524  | 1819040 |
| Sample_LCB17.Cluster58          | 62.20 | Clostridiales       | 11594  | 1398403 |
| Sample_LCB17.Cluster228         | 60.80 | Clostridiales       | 74224  | 1652783 |
| Sample_LCB17.Cluster2810        | 50.00 | Clostridiales       | 120465 | 1935426 |
| Sample_LCB17.Cluster5688        | 46.60 | Clostridiales       | 52015  | 1748830 |
| Sample_LCB17.mb.10cbin.1        | 41.70 | Clostridiales       | 166076 | 2412036 |
| Sample_LCB17.Cluster10309cbin.1 | 40.50 | Clostridiales       | 151377 | 1609210 |
| Sample_LCB17.Cluster3559cbin.1  | 48.70 | Firmicutes          | 32691  | 1880144 |
| Sample_LCB17.Cluster3277cbin.1  | 54.30 | Bacteroidetes       | 106339 | 2180675 |
| Sample_LCB17.Cluster245cbin.1   | 56.10 | Bacteroidales       | 142495 | 3440062 |
| Sample_LCB17.mb.11              | 57.30 | Clostridiales       | 49038  | 1777147 |
| Sample_LCB17.Cluster13887cbin.1 | 27.30 | Clostridiales       | 6429   | 2374355 |
| Sample_LCB17.mb.4               | 26.60 | Bacteria            | 190494 | 1457285 |
| Sample_LCB17.Cluster4           | 63.90 | Deltaproteobacteria | 13890  | 2336486 |
| Sample_LCB17.mb.23              | 37.60 | Clostridiales       | 35192  | 2047466 |
| Sample_LCB17.mb.27              | 34.20 | Clostridiales       | 97278  | 1972067 |
| Sample_LCB17.Cluster5194cbin.1  | 44.20 | Lachnospiraceae     | 14498  | 2455558 |
| Sample_LCB17.Cluster14164cbin.1 | 31.50 | Firmicutes          | 48101  | 1696314 |
| Sample_LCB17.Cluster4975        | 45.10 | Prevotella          | 54494  | 3265146 |
| Sample_LCB17.mb.128             | 33.80 | Clostridiales       | 59042  | 1913082 |
| Sample_LCB17.Cluster8299        | 41.00 | Lachnospiraceae     | 73906  | 2715894 |
| Sample_LCB17.mb.127             | 59.60 | Bacteroidetes       | 81606  | 2642774 |
| Sample_LCB17.mb.126             | 41.20 | Lachnospiraceae     | 27025  | 2264068 |
| Sample_LCB17.mb.26              | 46.30 | Bacteroidetes       | 168034 | 2386924 |
| Sample_LCB17.mb.131cbin.1       | 59.60 | Bifidobacteriaceae  | 237625 | 2063847 |
| Sample_LCB17.Cluster686cbin.1   | 55.70 | Proteobacteria      | 14602  | 2644598 |
| Sample_LCB17.mb.67              | 62.60 | Clostridiales       | 11434  | 1689052 |
| Sample_LCB17.mb.108             | 41.30 | Bacteroidales       | 97607  | 2656792 |
| Sample_LCB17.Cluster12249cbin.1 | 43.20 | Bacteria            | 50486  | 4073586 |
| Sample_LCB17.mb.65              | 45.00 | Clostridiales       | 40875  | 2444722 |
| Sample_LCB17.mb.106             | 38.40 | Bacteroidales       | 65148  | 3314784 |
| Sample_LCB17.mb.24cbin.1        | 50.40 | Bacteroidales       | 94351  | 2222837 |
| Sample_LCB17.mb.94cbin.1        | 58.10 | Clostridiales       | 34322  | 2978638 |
| Sample_LCB17.mb.83cbin.1        | 61.70 | Clostridiales       | 25383  | 2029816 |
| Sample_LCB17.mb.59cbin.1        | 46.30 | Lachnospiraceae     | 56853  | 3143189 |
| Sample_LCB17.Cluster5491cbin.1  | 45.70 | Bacteroidales       | 38582  | 4022039 |
| Sample_LCB17.mb.21              | 44.10 | Bacteroidales       | 114987 | 3164305 |
| Sample_LCB17.mb.88              | 60.20 | Actinobacteria      | 13940  | 1982659 |
| Sample_LCB17.mb.71              | 51.40 | Clostridiales       | 119170 | 2137253 |
| Sample_LCB17.mb.73              | 56.10 | Clostridiales       | 14892  | 2658060 |
| Sample_LCB17.mb.80cbin.1        | 57.80 | Clostridiales       | 37653  | 2647039 |
| Sample_LCB17.mb.86cbin.1        | 38.60 | Clostridiales       | 79815  | 2166949 |
| Sample_LCB17.mb.84              | 35.90 | Clostridiales       | 107543 | 2625302 |



|                                |       |                    |        |         |
|--------------------------------|-------|--------------------|--------|---------|
| Sample_LCB17.mb.98             | 41.10 | Clostridiales      | 157966 | 2508540 |
| Sample_LCB17.mb.118cbin.1      | 51.10 | Enterobacteriaceae | 8689   | 4059145 |
| Sample_LCB17.mb.81cbin.1       | 46.10 | Bacteroidales      | 46867  | 2968979 |
| Sample_LCB17.mb.62             | 45.50 | Bacteroidales      | 16133  | 4198527 |
| Sample_LCB19.mb.11cbin.1       | 46.40 | Bacteria           | 62001  | 1832259 |
| Sample_LCB19.Cluster50cbin.1   | 61.70 | Clostridiales      | 164109 | 1923642 |
| Sample_LCB19.mb.17cbin.1       | 57.70 | Clostridiales      | 10463  | 2130822 |
| Sample_LCB19.Cluster1720       | 47.90 | Clostridiales      | 99248  | 2936243 |
| Sample_LCB19.mb.91             | 33.30 | Clostridiales      | 51023  | 2208546 |
| Sample_LCB19.Cluster2356       | 45.80 | Selenomonadales    | 137490 | 1914417 |
| Sample_LCB19.Cluster833        | 53.90 | Clostridiales      | 616053 | 1773560 |
| Sample_LCB19.mb.47cbin.1       | 48.90 | Clostridiales      | 66190  | 2456082 |
| Sample_LCB19.Cluster1786       | 43.40 | Selenomonadales    | 84617  | 2336315 |
| Sample_LCB19.Cluster23cbin.1   | 60.40 | Bacteroidetes      | 9135   | 2378820 |
| Sample_LCB19.Cluster270cbin.1  | 56.00 | Proteobacteria     | 15408  | 2010738 |
| Sample_LCB19.Cluster4285cbin.1 | 40.90 | Clostridiales      | 185466 | 2102036 |
| Sample_LCB19.mb.44cbin.1       | 52.20 | Clostridiales      | 10206  | 1800466 |
| Sample_LCB19.mb.49             | 56.50 | Bifidobacteriaceae | 74997  | 1677283 |
| Sample_LCB19.Cluster3608       | 42.70 | Clostridiales      | 119580 | 2608355 |
| Sample_LCB19.mb.65             | 59.80 | Clostridiales      | 34141  | 1699243 |
| Sample_LCB19.mb.58             | 44.10 | Clostridiales      | 20793  | 3156284 |
| Sample_LCB19.Cluster2409cbin.1 | 43.70 | Bacteroidales      | 8873   | 2332719 |
| Sample_LCB19.mb.34             | 43.70 | Lachnospiraceae    | 101032 | 2829983 |
| Sample_LCB19.mb.87             | 56.60 | Clostridiales      | 15626  | 2320415 |
| Sample_LCB19.mb.38             | 26.90 | Clostridiales      | 130845 | 2441050 |
| Sample_LCB19.mb.67             | 45.40 | Clostridiales      | 46544  | 2463242 |
| Sample_LCB19.mb.75cbin.1       | 36.00 | Clostridiales      | 186246 | 2515815 |
| Sample_LCB19.Cluster4209cbin.1 | 39.70 | Lachnospiraceae    | 90239  | 3191376 |
| Sample_LCB19.Cluster3027cbin.1 | 42.10 | Bacteroidales      | 63697  | 3349357 |
| Sample_LCB19.mb.41             | 41.90 | Lachnospiraceae    | 13289  | 2204236 |
| Sample_LCB19.mb.1              | 42.50 | Bacteroides        | 49334  | 4034019 |
| Sample_LCB19.mb.61cbin.1       | 42.30 | Lachnospiraceae    | 93657  | 3991174 |
| Sample_LCB19.Cluster959cbin.1  | 45.10 | Bacteroidales      | 52648  | 4618596 |
| Sample_LCB19.mb.5              | 56.10 | Enterobacteriaceae | 177856 | 5416561 |
| Sample_LCB20.Cluster10120      | 26.40 | Bacteria           | 134571 | 1179179 |
| Sample_LCB20.Cluster9862       | 29.30 | Bacteria           | 223391 | 1134637 |
| Sample_LCB20.mb.6              | 26.00 | Bacteria           | 120217 | 1362353 |
| Sample_LCB20.mb.46             | 61.20 | Clostridiales      | 5328   | 1696126 |
| Sample_LCB20.Cluster531cbin.1  | 56.20 | Clostridiales      | 43608  | 2575652 |
| Sample_LCB20.mb.31cbin.1       | 61.80 | Clostridiales      | 66616  | 1535673 |
| Sample_LCB20.mb.55cbin.1       | 58.10 | Clostridiales      | 45421  | 3068008 |
| Sample_LCB20.mb.32             | 55.00 | Clostridiales      | 20214  | 2399220 |
| Sample_LCB20.mb.17             | 58.80 | Clostridiales      | 23781  | 2472777 |
| Sample_LCB20.Cluster3757cbin.1 | 44.20 | Selenomonadales    | 8517   | 1946320 |
| Sample_LCB20.mb.52cbin.1       | 57.30 | Clostridiales      | 91411  | 1886604 |
| Sample_LCB20.mb.37             | 37.00 | Clostridiales      | 6091   | 1416682 |
| Sample_LCB20.mb.78             | 60.70 | Clostridiales      | 16523  | 1753659 |
| Sample_LCB20.Cluster7747       | 40.50 | Clostridiales      | 142399 | 1948185 |
| Sample_LCB20.mb.10cbin.1       | 44.60 | Clostridiales      | 152324 | 1950640 |
| Sample_LCB20.Cluster552cbin.1  | 50.90 | Prevotella         | 68717  | 2440384 |
| Sample_LCB20.mb.64             | 42.00 | Clostridiales      | 6686   | 2253593 |
| Sample_LCB20.mb.20             | 60.20 | Bacteroidetes      | 39879  | 2485528 |
| Sample_LCB20.Cluster3414       | 51.30 | Clostridiales      | 141281 | 2259110 |
| Sample_LCB20.mb.16             | 43.10 | Clostridiales      | 40580  | 2571986 |
| Sample_LCB20.mb.68cbin.1       | 55.80 | Clostridiales      | 128792 | 2489224 |
| Sample_LCB20.mb.79cbin.1       | 50.00 | Clostridiales      | 130137 | 2280730 |
| Sample_LCB20.mb.19             | 58.90 | Bacteroidetes      | 112417 | 2660610 |
| Sample_LCB20.mb.65             | 54.80 | Bacteroidetes      | 123145 | 2190388 |

|                                 |       |                     |        |         |
|---------------------------------|-------|---------------------|--------|---------|
| Sample_LCB20.mb.54cbin.1        | 59.40 | Bacteroidetes       | 55103  | 2876977 |
| Sample_LCB20.Cluster5370cbin.1  | 43.40 | Bacteroidales       | 259499 | 3163922 |
| Sample_LCB20.Cluster5551cbin.1  | 42.70 | Bacteria            | 72926  | 4039252 |
| Sample_LCB20.Cluster6220cbin.1  | 44.90 | Bacteroidales       | 11114  | 4431612 |
| Sample_LCB20.mb.30              | 45.80 | Bacteroidales       | 130825 | 4231455 |
| Sample_LCB20.mb.23cbin.1        | 42.10 | Bacteroidales       | 38405  | 4251758 |
| Sample_LCB20.mb.83              | 47.10 | Bacteroidales       | 27260  | 3825602 |
| Sample_LCB20.Cluster2174        | 50.80 | Enterobacteriaceae  | 161312 | 4295585 |
| Sample_LCB20.mb.3               | 57.60 | Enterobacteriaceae  | 225948 | 4627972 |
| Sample_LCB21.Cluster12270cbin.1 | 26.70 | Bacteria            | 10680  | 1141058 |
| Sample_LCB21.Cluster33cbin.1    | 59.70 | Actinobacteria      | 5777   | 1557059 |
| Sample_LCB21.mb.108             | 49.50 | Clostridiales       | 96599  | 1996032 |
| Sample_LCB21.Cluster348         | 61.10 | Clostridiales       | 55049  | 1589597 |
| Sample_LCB21.Cluster3886cbin.1  | 48.40 | Firmicutes          | 11853  | 1589466 |
| Sample_LCB21.mb.18cbin.1        | 50.20 | Bacteroidales       | 74863  | 2492854 |
| Sample_LCB21.Cluster3188cbin.1  | 53.80 | Clostridiales       | 260816 | 1851801 |
| Sample_LCB21.Cluster771cbin.1   | 57.50 | Clostridiales       | 40857  | 2924079 |
| Sample_LCB21.mb.95cbin.1        | 53.70 | Clostridia          | 35872  | 1738217 |
| Sample_LCB21.Cluster9179        | 40.90 | Clostridiales       | 189060 | 2016579 |
| Sample_LCB21.Cluster6899cbin.1  | 45.00 | Clostridiales       | 14677  | 2360197 |
| Sample_LCB21.mb.56cbin.1        | 56.60 | Clostridiales       | 18125  | 2473721 |
| Sample_LCB21.Cluster7124cbin.1  | 43.10 | Clostridiales       | 34664  | 3338860 |
| Sample_LCB21.mb.76              | 34.00 | Bacteria            | 31023  | 1814203 |
| Sample_LCB21.mb.98cbin.1        | 57.00 | Clostridiales       | 59461  | 2288093 |
| Sample_LCB21.mb.77              | 41.10 | Lachnospiraceae     | 111145 | 2820725 |
| Sample_LCB21.mb.50cbin.1        | 51.20 | Clostridiales       | 148149 | 2331023 |
| Sample_LCB21.mb.70              | 48.90 | Clostridiales       | 54659  | 2762195 |
| Sample_LCB21.Cluster4525cbin.1  | 48.40 | Proteobacteria      | 54778  | 2587753 |
| Sample_LCB21.mb.102cbin.1       | 58.30 | Bacteroidetes       | 148457 | 3173790 |
| Sample_LCB21.mb.36cbin.1        | 40.30 | Lachnospiraceae     | 26215  | 2980818 |
| Sample_LCB21.Cluster8836cbin.1  | 39.90 | Lachnospiraceae     | 36900  | 3764945 |
| Sample_LCB21.Cluster84cbin.1    | 59.80 | Clostridiales       | 44941  | 4347472 |
| Sample_LCB21.mb.9cbin.1         | 43.80 | Selenomonadales     | 43526  | 2290274 |
| Sample_LCB21.mb.91              | 44.50 | Clostridiales       | 144056 | 2241599 |
| Sample_LCB21.mb.96              | 62.50 | Deltaproteobacteria | 39632  | 3578815 |
| Sample_LCB21.mb.53cbin.1        | 42.00 | Clostridiales       | 22644  | 3178796 |
| Sample_LCB21.Cluster7184cbin.1  | 45.20 | Bacteroidales       | 47818  | 4522414 |
| Sample_LCB21.mb.68              | 46.80 | Bacteroidales       | 33998  | 3980741 |
| Sample_LCB21.mb.87              | 45.80 | Bacteroidales       | 32092  | 3680485 |
| Sample_LCB21.mb.66              | 41.70 | Bacteroidales       | 35188  | 4634548 |
| Sample_LCB21.Cluster4135cbin.1  | 50.70 | Enterobacteriaceae  | 93850  | 4859998 |
| Sample_LCB22.Cluster2302cbin.1  | 50.80 | Bacteria            | 89434  | 1870211 |
| Sample_LCB22.mb.44              | 59.00 | Bacteria            | 29580  | 2310456 |
| Sample_LCB22.Cluster11885       | 32.80 | Bacteria            | 135835 | 1706399 |
| Sample_LCB22.mb.4cbin.1         | 49.60 | Clostridiales       | 94580  | 1918936 |
| Sample_LCB22.Cluster494cbin.1   | 56.00 | Clostridiales       | 30229  | 2919499 |
| Sample_LCB22.mb.92              | 26.70 | Bacteria            | 43962  | 1314793 |
| Sample_LCB22.Cluster190cbin.1   | 59.80 | Actinobacteria      | 19797  | 2035613 |
| Sample_LCB22.mb.15              | 58.20 | Clostridiales       | 29195  | 2199584 |
| Sample_LCB22.mb.7               | 58.10 | Clostridiales       | 40379  | 3108703 |
| Sample_LCB22.Cluster4801cbin.1  | 46.70 | Lachnospiraceae     | 57313  | 2710050 |
| Sample_LCB22.Cluster3595        | 47.30 | Selenomonadales     | 84326  | 2132392 |
| Sample_LCB22.mb.50cbin.1        | 60.00 | Clostridiales       | 101268 | 2195657 |
| Sample_LCB22.Cluster6899        | 41.50 | Clostridiales       | 475347 | 1748462 |
| Sample_LCB22.mb.16              | 57.90 | Clostridiales       | 56343  | 2882242 |
| Sample_LCB22.Cluster127         | 55.40 | Bacteria            | 318695 | 2729157 |
| Sample_LCB22.mb.31              | 59.20 | Clostridiales       | 11489  | 2095898 |
| Sample_LCB22.Cluster9445        | 38.60 | Clostridiales       | 142468 | 2152762 |

|                                 |       |                    |        |         |
|---------------------------------|-------|--------------------|--------|---------|
| Sample_LCB22.mb.10              | 41.30 | Clostridiales      | 239689 | 2549019 |
| Sample_LCB22.mb.64cbin.1        | 54.90 | Bacteroidetes      | 32940  | 1902889 |
| Sample_LCB22.Cluster10629cbin.1 | 36.80 | Clostridiales      | 10287  | 2878026 |
| Sample_LCB22.Cluster7041cbin.1  | 41.30 | Lachnospiraceae    | 69121  | 2900621 |
| Sample_LCB22.mb.24              | 36.00 | Clostridiales      | 185114 | 2480657 |
| Sample_LCB22.Cluster5886        | 42.20 | Bacteroidales      | 66368  | 3647458 |
| Sample_LCB22.mb.74              | 61.60 | Proteobacteria     | 39535  | 2481450 |
| Sample_LCB22.mb.58              | 41.80 | Lachnospiraceae    | 54199  | 2729860 |
| Sample_LCB22.mb.71cbin.1        | 44.90 | Prevotella         | 34048  | 3415741 |
| Sample_LCB22.Cluster2133cbin.1  | 41.60 | Bacteroidales      | 38369  | 3846829 |
| Sample_LCB22.Cluster4267        | 45.30 | Bacteroidales      | 73136  | 4032948 |
| Sample_LCB22.mb.63cbin.1        | 48.70 | Bacteroidales      | 25935  | 3457769 |
| Sample_LCB22.mb.13cbin.1        | 44.70 | Bacteroidales      | 46754  | 4871693 |
| Sample_LCB22.mb.91cbin.1        | 42.80 | Bacteria           | 50071  | 4299039 |
| Sample_LCB22.mb.46cbin.1        | 50.50 | Enterobacteriaceae | 172334 | 4925115 |
| Sample_LCB23.Cluster8702        | 38.20 | Clostridiales      | 143330 | 2022625 |
| Sample_LCB23.Cluster351cbin.1   | 58.10 | Clostridiales      | 70927  | 2074890 |
| Sample_LCB23.Cluster597cbin.1   | 55.70 | Clostridiales      | 57418  | 2921785 |
| Sample_LCB23.Cluster4176cbin.1  | 47.60 | Selenomonadales    | 25954  | 1949061 |
| Sample_LCB23.Cluster153         | 59.70 | Actinobacteria     | 120885 | 2171913 |
| Sample_LCB23.Cluster1202cbin.1  | 51.60 | Clostridiales      | 23368  | 2008073 |
| Sample_LCB23.mb.15cbin.1        | 51.60 | Bacteroidales      | 73070  | 2269875 |
| Sample_LCB23.Cluster750cbin.1   | 54.40 | Bacteroidetes      | 76463  | 2218040 |
| Sample_LCB23.Cluster5199        | 44.40 | Clostridiales      | 159896 | 2496872 |
| Sample_LCB23.Cluster540         | 55.60 | Bacteria           | 43031  | 2672904 |
| Sample_LCB23.Cluster10099cbin.1 | 37.70 | Clostridiales      | 10097  | 2093825 |
| Sample_LCB23.Cluster7723        | 40.80 | Clostridiales      | 125240 | 2069378 |
| Sample_LCB23.Cluster10438       | 28.20 | Bacteria           | 31318  | 2432101 |
| Sample_LCB23.mb.5cbin.1         | 49.10 | Clostridiales      | 34982  | 2575318 |
| Sample_LCB23.Cluster37          | 63.10 | Proteobacteria     | 47329  | 2586047 |
| Sample_LCB23.mb.87cbin.1        | 61.90 | Clostridiales      | 7334   | 2142530 |
| Sample_LCB23.mb.35              | 60.20 | Clostridiales      | 38753  | 2373319 |
| Sample_LCB23.Cluster527         | 53.80 | Selenomonadales    | 41110  | 2096302 |
| Sample_LCB23.Cluster6112cbin.1  | 49.80 | Bacteroidales      | 65029  | 2379354 |
| Sample_LCB23.Cluster647cbin.1   | 55.30 | Bacteroidales      | 58120  | 2691326 |
| Sample_LCB23.mb.72              | 43.80 | Lachnospiraceae    | 101291 | 2632317 |
| Sample_LCB23.mb.67cbin.1        | 44.60 | Clostridiales      | 86271  | 3021678 |
| Sample_LCB23.mb.73cbin.1        | 41.30 | Lachnospiraceae    | 53658  | 3078908 |
| Sample_LCB23.mb.90cbin.1        | 41.70 | Lachnospiraceae    | 74821  | 2536536 |
| Sample_LCB23.Cluster2610        | 45.40 | Bacteroidales      | 92210  | 4133510 |
| Sample_LCB23.Cluster3712cbin.1  | 41.60 | Bacteroidales      | 36346  | 5213647 |
| Sample_LCB23.mb.20cbin.1        | 50.90 | Enterobacteriaceae | 43085  | 4645024 |
| Sample_LCB24.Cluster810         | 51.90 | Clostridiales      | 16165  | 1810097 |
| Sample_LCB24.Cluster528cbin.1   | 54.60 | Bacteroidetes      | 26990  | 2051829 |
| Sample_LCB24.mb.60cbin.1        | 61.00 | Clostridiales      | 27756  | 2112230 |
| Sample_LCB24.Cluster1115cbin.1  | 48.30 | Firmicutes         | 38337  | 1928170 |
| Sample_LCB24.Cluster162cbin.1   | 56.40 | Clostridiales      | 14335  | 2439074 |
| Sample_LCB24.Cluster253cbin.1   | 60.50 | Bifidobacteriaceae | 156276 | 2222386 |
| Sample_LCB24.Cluster3220cbin.1  | 44.30 | Clostridiales      | 194490 | 2201226 |
| Sample_LCB24.mb.56              | 59.90 | Actinobacteria     | 40657  | 2136311 |
| Sample_LCB24.Cluster7479        | 32.50 | Lactobacillales    | 133187 | 1863016 |
| Sample_LCB24.Cluster52          | 62.40 | Proteobacteria     | 52753  | 2404002 |
| Sample_LCB24.Cluster4368cbin.1  | 41.20 | Lachnospiraceae    | 86249  | 2962799 |
| Sample_LCB24.mb.61              | 52.80 | Lactobacillales    | 55907  | 1802948 |
| Sample_LCB24.mb.70cbin.1        | 62.90 | Bifidobacteriaceae | 71337  | 2107120 |
| Sample_LCB24.Cluster4504cbin.1  | 43.10 | Bacteria           | 7521   | 3466620 |
| Sample_LCB24.Cluster5212cbin.1  | 38.40 | Bacteroidales      | 36250  | 3431763 |
| Sample_LCB24.mb.77              | 34.70 | Lactobacillus      | 43056  | 1848855 |

|                                 |       |                    |        |         |
|---------------------------------|-------|--------------------|--------|---------|
| Sample_LCB24.mb.81cbin.1        | 53.90 | Selenomonadales    | 75654  | 2201240 |
| Sample_LCB24.mb.50              | 41.80 | Lachnospiraceae    | 16956  | 2274217 |
| Sample_LCB24.mb.7               | 58.70 | Bifidobacteriaceae | 34908  | 2364407 |
| Sample_LCB24.mb.71cbin.1        | 45.10 | Bacteroidales      | 37520  | 4506993 |
| Sample_LCB24.mb.17cbin.1        | 51.00 | Enterobacteriaceae | 15823  | 4326959 |
| Sample_LCB25.mb.71cbin.1        | 48.50 | Clostridiales      | 10115  | 2602752 |
| Sample_LCB25.Cluster768cbin.1   | 56.80 | Clostridiales      | 6846   | 2086526 |
| Sample_LCB25.Cluster4305cbin.1  | 38.20 | Clostridiales      | 7463   | 1639153 |
| Sample_LCB25.mb.21cbin.1        | 49.00 | Clostridiales      | 29982  | 2670304 |
| Sample_LCB25.Cluster468         | 54.60 | Bacteroidetes      | 84968  | 2023823 |
| Sample_LCB25.Cluster2594        | 43.40 | Selenomonadales    | 149110 | 2518368 |
| Sample_LCB25.Cluster6031cbin.1  | 27.20 | Clostridiales      | 9016   | 2235391 |
| Sample_LCB25.Cluster2cbin.1     | 57.40 | Clostridiales      | 24645  | 2511172 |
| Sample_LCB25.mb.17              | 61.80 | Proteobacteria     | 13948  | 2276644 |
| Sample_LCB25.mb.59              | 60.10 | Clostridiales      | 55393  | 2547815 |
| Sample_LCB25.mb.25              | 36.00 | Clostridiales      | 80029  | 2421683 |
| Sample_LCB25.mb.72              | 40.60 | Clostridiales      | 167673 | 2046761 |
| Sample_LCB25.Cluster14          | 60.10 | Bifidobacteriaceae | 302703 | 2419512 |
| Sample_LCB25.mb.65              | 59.30 | Bacteroidetes      | 158360 | 2793500 |
| Sample_LCB25.mb.70cbin.1        | 45.10 | Prevotella         | 32221  | 3278494 |
| Sample_LCB25.mb.20cbin.1        | 45.20 | Bacteroidales      | 71427  | 3146907 |
| Sample_LCB25.mb.22              | 41.30 | Lachnospiraceae    | 54140  | 3093038 |
| Sample_LCB25.Cluster6084        | 29.10 | Bacteria           | 85458  | 2599744 |
| Sample_LCB25.mb.45              | 43.30 | Bacteroidales      | 47296  | 2946997 |
| Sample_LCB25.mb.58cbin.1        | 40.50 | Lachnospiraceae    | 44847  | 3448588 |
| Sample_LCB25.mb.2cbin.1         | 31.20 | Firmicutes         | 53025  | 2589349 |
| Sample_LCB25.mb.10              | 42.70 | Lachnospiraceae    | 93071  | 3595386 |
| Sample_LCB25.Cluster4572cbin.1  | 43.20 | Bacteria           | 60765  | 4068629 |
| Sample_LCB25.Cluster1584cbin.1  | 45.60 | Bacteroidales      | 29692  | 4096718 |
| Sample_LCB25.Cluster779cbin.1   | 50.80 | Enterobacteriaceae | 79427  | 4537440 |
| Sample_LCC09.Cluster2953cbin.1  | 52.80 | Clostridia         | 149944 | 1708442 |
| Sample_LCC09.Cluster1771cbin.1  | 52.90 | Clostridia         | 19705  | 2023090 |
| Sample_LCC09.Cluster10253cbin.1 | 43.40 | Clostridiales      | 13997  | 2725867 |
| Sample_LCC09.mb.103cbin.1       | 52.40 | Clostridiales      | 76589  | 2041163 |
| Sample_LCC09.Cluster1325cbin.1  | 57.90 | Clostridiales      | 27002  | 2117310 |
| Sample_LCC09.Cluster32cbin.1    | 58.80 | Clostridiales      | 18316  | 2319374 |
| Sample_LCC09.mb.108cbin.1       | 56.50 | Clostridiales      | 60233  | 2545679 |
| Sample_LCC09.Cluster1576cbin.1  | 56.30 | Clostridiales      | 15284  | 2304370 |
| Sample_LCC09.Cluster1143cbin.1  | 58.70 | Clostridiales      | 17954  | 2232474 |
| Sample_LCC09.mb.110cbin.1       | 47.90 | Clostridiales      | 75738  | 3035994 |
| Sample_LCC09.mb.125             | 49.50 | Clostridiales      | 24943  | 2436596 |
| Sample_LCC09.Cluster11861       | 32.50 | Lactobacillales    | 122318 | 1838793 |
| Sample_LCC09.Cluster2611        | 50.50 | Lactobacillales    | 38711  | 1858651 |
| Sample_LCC09.mb.106cbin.1       | 53.60 | Clostridiales      | 170296 | 1883584 |
| Sample_LCC09.Cluster7300cbin.1  | 43.90 | Clostridiales      | 20624  | 3467720 |
| Sample_LCC09.Cluster9141        | 40.90 | Clostridiales      | 190699 | 2057738 |
| Sample_LCC09.mb.29cbin.1        | 46.30 | Clostridiales      | 46258  | 1912186 |
| Sample_LCC09.mb.59              | 49.40 | Clostridiales      | 86241  | 1952900 |
| Sample_LCC09.Cluster8951cbin.1  | 37.60 | Clostridiales      | 11641  | 2498171 |
| Sample_LCC09.mb.18              | 44.50 | Clostridiales      | 16420  | 2444452 |
| Sample_LCC09.mb.46cbin.1        | 61.00 | Clostridiales      | 72226  | 1905653 |
| Sample_LCC09.mb.128             | 43.70 | Lachnospiraceae    | 103337 | 2717194 |
| Sample_LCC09.mb.137cbin.1       | 56.40 | Bifidobacteriaceae | 100393 | 2117585 |
| Sample_LCC09.Cluster898         | 58.70 | Bacteroidetes      | 130202 | 2917634 |
| Sample_LCC09.mb.49cbin.1        | 60.80 | Clostridiales      | 80860  | 2216927 |
| Sample_LCC09.mb.1cbin.1         | 42.80 | Clostridiales      | 141262 | 2642818 |
| Sample_LCC09.mb.41cbin.1        | 60.50 | Clostridiales      | 51372  | 2251658 |
| Sample_LCC09.Cluster5114cbin.1  | 44.30 | Bacteroidales      | 141285 | 3502765 |

|                                |       |                    |        |         |
|--------------------------------|-------|--------------------|--------|---------|
| Sample_LCC09.mb.96             | 34.20 | Clostridiales      | 15202  | 2216342 |
| Sample_LCC09.mb.79             | 57.60 | Clostridiales      | 7757   | 2384848 |
| Sample_LCC09.Cluster2591cbin.1 | 45.50 | Bacteroidales      | 102023 | 3918491 |
| Sample_LCC09.mb.93             | 37.00 | Clostridiales      | 44049  | 2566091 |
| Sample_LCC09.mb.6              | 43.50 | Selenomonadales    | 13507  | 2058110 |
| Sample_LCC09.mb.45             | 58.60 | Bifidobacteriaceae | 48811  | 2210990 |
| Sample_LCC09.mb.27cbin.1       | 48.30 | Proteobacteria     | 45833  | 2814194 |
| Sample_LCC09.Cluster6301cbin.1 | 42.30 | Bacteria           | 100817 | 4481218 |
| Sample_LCC09.mb.60cbin.1       | 62.80 | Bifidobacteriaceae | 110749 | 2055075 |
| Sample_LCC09.mb.20             | 46.80 | Bacteroidales      | 93408  | 3322610 |
| Sample_LCC09.mb.56cbin.1       | 40.50 | Clostridiales      | 101806 | 2727638 |
| Sample_LCC09.mb.104            | 43.10 | Bacteroidales      | 177623 | 4897423 |
| Sample_LCC09.mb.61cbin.1       | 42.20 | Lachnospiraceae    | 67224  | 2561740 |
| Sample_LCC09.mb.64cbin.1       | 40.80 | Lachnospiraceae    | 78145  | 3198017 |
| Sample_LCC09.mb.77             | 41.70 | Lachnospiraceae    | 39143  | 2294816 |
| Sample_LCC10.Cluster8948       | 26.00 | Bacteria           | 307090 | 1298271 |
| Sample_LCC10.mb.16             | 47.10 | Clostridiales      | 18565  | 1960328 |
| Sample_LCC10.Cluster705cbin.1  | 58.50 | Clostridiales      | 6794   | 1843577 |
| Sample_LCC10.Cluster634cbin.1  | 56.20 | Clostridiales      | 59766  | 2332847 |
| Sample_LCC10.mb.70             | 52.70 | Clostridia         | 81906  | 2165451 |
| Sample_LCC10.mb.101cbin.1      | 56.50 | Clostridiales      | 53376  | 2758012 |
| Sample_LCC10.Cluster2822cbin.1 | 46.30 | Clostridiales      | 10167  | 2074225 |
| Sample_LCC10.mb.75             | 49.40 | Clostridiales      | 86195  | 1946110 |
| Sample_LCC10.mb.60cbin.1       | 38.10 | Clostridiales      | 22967  | 3264625 |
| Sample_LCC10.mb.46             | 60.90 | Clostridiales      | 59020  | 2260586 |
| Sample_LCC10.Cluster99         | 58.90 | Clostridiales      | 15103  | 1920760 |
| Sample_LCC10.Cluster1836cbin.1 | 48.60 | Firmicutes         | 32227  | 1675142 |
| Sample_LCC10.Cluster742        | 58.10 | Bifidobacteriaceae | 107423 | 2034984 |
| Sample_LCC10.mb.65cbin.1       | 48.50 | Clostridiales      | 14820  | 2752416 |
| Sample_LCC10.mb.102            | 60.80 | Clostridiales      | 20572  | 2280872 |
| Sample_LCC10.Cluster6772cbin.1 | 40.90 | Clostridiales      | 175133 | 2058909 |
| Sample_LCC10.Cluster620cbin.1  | 59.50 | Bacteroidetes      | 62337  | 2773754 |
| Sample_LCC10.mb.14cbin.1       | 44.10 | Lachnospiraceae    | 88699  | 2227666 |
| Sample_LCC10.mb.47             | 56.50 | Clostridiales      | 7656   | 2251120 |
| Sample_LCC10.Cluster272        | 55.60 | Bacteria           | 118198 | 2613506 |
| Sample_LCC10.mb.93             | 53.60 | Clostridiales      | 27879  | 1781387 |
| Sample_LCC10.Cluster8756cbin.1 | 32.40 | Lactobacillales    | 129010 | 1844264 |
| Sample_LCC10.Cluster1767cbin.1 | 50.30 | Lactobacillales    | 22395  | 1893472 |
| Sample_LCC10.Cluster6632cbin.1 | 37.50 | Clostridiales      | 7899   | 2490530 |
| Sample_LCC10.mb.63cbin.1       | 51.50 | Clostridiales      | 200348 | 2418680 |
| Sample_LCC10.mb.29             | 58.80 | Bacteroidetes      | 225759 | 2797902 |
| Sample_LCC10.mb.82cbin.1       | 53.70 | Clostridiales      | 280656 | 1882672 |
| Sample_LCC10.mb.84cbin.1       | 40.70 | Lachnospiraceae    | 65232  | 3130578 |
| Sample_LCC10.Cluster5474cbin.1 | 44.80 | Bacteroidales      | 139091 | 3847821 |
| Sample_LCC10.mb.89cbin.1       | 42.30 | Clostridiales      | 142711 | 2785753 |
| Sample_LCC10.Cluster3676cbin.1 | 46.50 | Bacteroidales      | 100989 | 4045239 |
| Sample_LCC10.mb.83             | 48.60 | Proteobacteria     | 35680  | 2663607 |
| Sample_LCC10.Cluster7124cbin.1 | 42.00 | Bacteroidales      | 71753  | 4656423 |
| Sample_LCC10.mb.50cbin.1       | 42.30 | Bacteria           | 27788  | 4370880 |
| Sample_LCC10.mb.38cbin.1       | 51.50 | Enterobacteriaceae | 6992   | 3558113 |
| Sample_LCC10.mb.95             | 45.50 | Bacteroidales      | 97398  | 3451248 |
| Sample_LCC10.mb.98cbin.1       | 42.60 | Bacteroides        | 57840  | 5821047 |
| Sample_LCC11.Cluster6383       | 49.60 | Clostridiales      | 82763  | 1914889 |
| Sample_LCC11.Cluster3915cbin.1 | 52.90 | Clostridia         | 58693  | 2076813 |
| Sample_LCC11.mb.16cbin.1       | 62.40 | Clostridiales      | 9236   | 1605131 |
| Sample_LCC11.mb.47cbin.1       | 49.10 | Bacteria           | 8791   | 1849463 |
| Sample_LCC11.mb.41cbin.1       | 57.20 | Clostridia         | 30153  | 3432942 |
| Sample_LCC11.mb.11             | 56.90 | Clostridiales      | 71322  | 1805150 |

|                                 |       |                    |        |         |
|---------------------------------|-------|--------------------|--------|---------|
| Sample_LCC11.mb.64              | 58.40 | Clostridiales      | 7337   | 2597497 |
| Sample_LCC11.mb.33              | 62.60 | Clostridiales      | 24173  | 2078513 |
| Sample_LCC11.mb.52              | 60.80 | Clostridiales      | 74942  | 1860481 |
| Sample_LCC11.Cluster11053       | 37.80 | Clostridiales      | 90195  | 1934951 |
| Sample_LCC11.Cluster25cbin.1    | 63.60 | Actinobacteria     | 26723  | 2745402 |
| Sample_LCC11.Cluster10094cbin.1 | 40.40 | Clostridiales      | 162611 | 2120593 |
| Sample_LCC11.Cluster10060cbin.1 | 40.90 | Clostridiales      | 66410  | 2519054 |
| Sample_LCC11.mb.62cbin.1        | 56.60 | Clostridiales      | 19941  | 2312076 |
| Sample_LCC11.Cluster5200        | 51.20 | Clostridiales      | 126921 | 2192541 |
| Sample_LCC11.Cluster2495        | 55.60 | Bacteria           | 128893 | 2694365 |
| Sample_LCC11.mb.70              | 61.30 | Clostridiales      | 38135  | 1995624 |
| Sample_LCC11.mb.29              | 58.50 | Bacteroidetes      | 20355  | 2670779 |
| Sample_LCC11.mb.9cbin.1         | 62.20 | Clostridiales      | 10362  | 1551102 |
| Sample_LCC11.Cluster937         | 59.80 | Bifidobacteriaceae | 186628 | 2095967 |
| Sample_LCC11.Cluster8812        | 43.90 | Clostridiales      | 202453 | 2904802 |
| Sample_LCC11.Cluster8336cbin.1  | 41.50 | Lachnospiraceae    | 7609   | 2895768 |
| Sample_LCC11.mb.80              | 55.70 | Clostridiales      | 11667  | 3430531 |
| Sample_LCC11.mb.54cbin.1        | 41.70 | Lachnospiraceae    | 88545  | 2538937 |
| Sample_LCC11.Cluster6780        | 45.50 | Bacteroidales      | 107689 | 3877327 |
| Sample_LCC11.mb.2               | 46.60 | Bacteroidales      | 26615  | 3954806 |
| Sample_LCC11.mb.10              | 42.00 | Bacteroidales      | 106765 | 4201251 |
| Sample_LCC12.Cluster3883        | 50.70 | Bacteria           | 44470  | 1857580 |
| Sample_LCC12.Cluster3277        | 53.30 | Clostridia         | 84701  | 1814979 |
| Sample_LCC12.mb.114             | 26.40 | Bacteria           | 77177  | 1265566 |
| Sample_LCC12.Cluster5768        | 48.70 | Clostridia         | 251872 | 2050333 |
| Sample_LCC12.mb.20              | 27.60 | Bacteria           | 112929 | 1119309 |
| Sample_LCC12.Cluster12140       | 41.90 | Clostridiales      | 179624 | 2165979 |
| Sample_LCC12.mb.104             | 60.00 | Clostridia         | 6765   | 2342244 |
| Sample_LCC12.Cluster15287cbin.1 | 33.30 | Clostridiales      | 109779 | 2638858 |
| Sample_LCC12.mb.117             | 48.40 | Clostridiales      | 25315  | 1769813 |
| Sample_LCC12.Cluster59cbin.1    | 61.70 | Clostridiales      | 11587  | 1703107 |
| Sample_LCC12.Cluster836cbin.1   | 59.20 | Clostridiales      | 39696  | 1920425 |
| Sample_LCC12.Cluster8334cbin.1  | 45.10 | Clostridiales      | 80905  | 2588384 |
| Sample_LCC12.Cluster1827        | 55.30 | Bacteroidetes      | 49349  | 1837110 |
| Sample_LCC12.mb.103cbin.1       | 56.70 | Clostridiales      | 83732  | 2028878 |
| Sample_LCC12.Cluster3878cbin.1  | 48.70 | Firmicutes         | 32623  | 1944133 |
| Sample_LCC12.mb.34cbin.1        | 57.10 | Clostridiales      | 13842  | 1763225 |
| Sample_LCC12.Cluster3959        | 52.50 | Clostridiales      | 228685 | 2020904 |
| Sample_LCC12.mb.111             | 59.60 | Actinobacteria     | 57170  | 2204036 |
| Sample_LCC12.mb.91cbin.1        | 57.10 | Bacteria           | 35449  | 2584759 |
| Sample_LCC12.mb.13              | 56.90 | Bacteroidales      | 9972   | 2991357 |
| Sample_LCC12.mb.108cbin.1       | 49.30 | Bacteroidales      | 37523  | 2942970 |
| Sample_LCC12.mb.58              | 62.50 | Clostridiales      | 49127  | 1814967 |
| Sample_LCC12.mb.16cbin.1        | 53.90 | Clostridiales      | 177579 | 1908687 |
| Sample_LCC12.mb.119             | 41.00 | Clostridiales      | 16890  | 1932824 |
| Sample_LCC12.mb.62cbin.1        | 60.50 | Clostridiales      | 64906  | 1814409 |
| Sample_LCC12.mb.19cbin.1        | 61.50 | Bacteroidetes      | 101450 | 2346464 |
| Sample_LCC12.mb.42              | 56.30 | Bacteria           | 7581   | 2217725 |
| Sample_LCC12.mb.24              | 44.40 | Clostridiales      | 194373 | 2590262 |
| Sample_LCC12.Cluster4565cbin.1  | 45.20 | Bacteroidales      | 12850  | 2889434 |
| Sample_LCC12.mb.29              | 41.80 | Lachnospiraceae    | 47095  | 2604868 |
| Sample_LCC12.Cluster9948cbin.1  | 44.80 | Prevotella         | 55804  | 3743259 |
| Sample_LCC12.mb.99              | 56.60 | Clostridiales      | 36580  | 2533175 |
| Sample_LCC12.mb.49cbin.1        | 44.50 | Clostridiales      | 67809  | 2173377 |
| Sample_LCC12.mb.6               | 43.70 | Lachnospiraceae    | 96861  | 2475338 |
| Sample_LCC12.mb.69              | 56.50 | Clostridiales      | 12815  | 2441273 |
| Sample_LCC12.mb.72              | 60.30 | Clostridiales      | 21851  | 2536755 |
| Sample_LCC12.mb.77              | 42.30 | Clostridiales      | 56713  | 1819656 |

|                                |       |                     |        |         |
|--------------------------------|-------|---------------------|--------|---------|
| Sample_LCC12.mb.47cbin.1       | 42.20 | Lachnospiraceae     | 42621  | 2331428 |
| Sample_LCC12.mb.81             | 60.40 | Bacteroidetes       | 29530  | 2629684 |
| Sample_LCC12.mb.22             | 41.90 | Bacteroidales       | 24006  | 4743012 |
| Sample_LCC12.mb.35cbin.1       | 46.50 | Bacteroidales       | 96580  | 4557669 |
| Sample_LCC12.Cluster134cbin.1  | 57.90 | Enterobacteriaceae  | 32226  | 4987753 |
| Sample_LCC12.mb.68cbin.1       | 50.50 | Enterobacteriaceae  | 26105  | 4603325 |
| Sample_LCC13.Cluster3327cbin.1 | 50.60 | Bacteria            | 62632  | 1902653 |
| Sample_LCC13.mb.15             | 42.20 | Bacteria            | 56166  | 4516768 |
| Sample_LCC13.mb.10cbin.1       | 50.10 | Clostridiales       | 90647  | 2080467 |
| Sample_LCC13.Cluster148cbin.1  | 60.90 | Clostridiales       | 22345  | 1747370 |
| Sample_LCC13.Cluster203cbin.1  | 61.90 | Clostridiales       | 48714  | 1747872 |
| Sample_LCC13.mb.24             | 58.10 | Clostridiales       | 43532  | 2989030 |
| Sample_LCC13.mb.102cbin.1      | 60.40 | Clostridiales       | 42688  | 1914889 |
| Sample_LCC13.mb.107cbin.1      | 62.10 | Clostridiales       | 40462  | 1851732 |
| Sample_LCC13.mb.108cbin.1      | 57.20 | Clostridiales       | 86306  | 1876651 |
| Sample_LCC13.mb.2              | 61.20 | Clostridiales       | 66447  | 2172081 |
| Sample_LCC13.Cluster521cbin.1  | 59.90 | Actinobacteria      | 58094  | 2237006 |
| Sample_LCC13.mb.22             | 45.00 | Clostridiales       | 9864   | 2219420 |
| Sample_LCC13.Cluster1228cbin.1 | 54.80 | Bacteroidetes       | 42952  | 2139611 |
| Sample_LCC13.Cluster2671       | 53.60 | Clostridiales       | 268357 | 1917306 |
| Sample_LCC13.mb.29             | 57.20 | Clostridiales       | 39290  | 1897324 |
| Sample_LCC13.Cluster13355      | 31.00 | Euryarchaeota       | 129264 | 1769319 |
| Sample_LCC13.Cluster9468cbin.1 | 38.90 | Clostridiales       | 60241  | 1897139 |
| Sample_LCC13.mb.20cbin.1       | 43.30 | Lachnospiraceae     | 51169  | 2852337 |
| Sample_LCC13.Cluster283cbin.1  | 52.00 | Clostridiales       | 151068 | 2213166 |
| Sample_LCC13.mb.18             | 58.90 | Bacteroidetes       | 102352 | 2283966 |
| Sample_LCC13.Cluster6965cbin.1 | 42.70 | Lachnospiraceae     | 7730   | 2036268 |
| Sample_LCC13.Cluster9914       | 40.60 | Clostridiales       | 129680 | 2112503 |
| Sample_LCC13.mb.1cbin.1        | 56.60 | Clostridiales       | 8873   | 2234672 |
| Sample_LCC13.Cluster19cbin.1   | 63.30 | Deltaproteobacteria | 76963  | 2640469 |
| Sample_LCC13.Cluster477cbin.1  | 59.90 | Bifidobacteriaceae  | 95754  | 2484549 |
| Sample_LCC13.Cluster8306       | 43.00 | Clostridiales       | 137539 | 2663979 |
| Sample_LCC13.mb.71cbin.1       | 52.60 | Clostridiales       | 60406  | 2242386 |
| Sample_LCC13.mb.53cbin.1       | 59.20 | Clostridiales       | 6661   | 1771870 |
| Sample_LCC13.mb.3              | 59.50 | Clostridiales       | 61726  | 3281891 |
| Sample_LCC13.mb.39cbin.1       | 43.40 | Selenomonadales     | 45833  | 2287967 |
| Sample_LCC13.mb.36cbin.1       | 29.10 | Bacteria            | 47344  | 2674602 |
| Sample_LCC13.mb.74             | 56.70 | Clostridiales       | 19595  | 2154466 |
| Sample_LCC13.Cluster5527       | 43.20 | Bacteria            | 108883 | 4032520 |
| Sample_LCC13.mb.25             | 43.30 | Bacteroidales       | 140191 | 2853314 |
| Sample_LCC13.mb.60             | 60.40 | Clostridiales       | 22747  | 2459586 |
| Sample_LCC13.mb.42cbin.1       | 57.80 | Clostridiales       | 27373  | 3442718 |
| Sample_LCC13.mb.69             | 59.60 | Bacteroidetes       | 77820  | 2654863 |
| Sample_LCC13.mb.96             | 59.80 | Clostridiales       | 44257  | 2270287 |
| Sample_LCC13.mb.93             | 57.00 | Bacteroidales       | 21169  | 2984610 |
| Sample_LCC13.Cluster8065cbin.1 | 42.00 | Bacteroidales       | 21454  | 4638298 |
| Sample_LCC13.mb.99cbin.1       | 60.30 | Bacteroidetes       | 33135  | 2554829 |
| Sample_LCC13.mb.30             | 45.20 | Bacteroidales       | 188570 | 4206746 |
| Sample_LCC13.mb.75             | 41.90 | Lachnospiraceae     | 68745  | 2384796 |
| Sample_LCC13.mb.47             | 45.60 | Bacteroidales       | 63462  | 3557288 |
| Sample_LCC13.Cluster2164cbin.1 | 50.50 | Enterobacteriaceae  | 77846  | 4845843 |
| Sample_LCC13.mb.70             | 46.30 | Bacteroidales       | 231698 | 4251920 |
| Sample_LCC13.mb.91cbin.1       | 58.40 | Enterobacteriaceae  | 6769   | 3965664 |
| Sample_LCC14.Cluster1275       | 51.90 | Clostridia          | 379506 | 2403182 |
| Sample_LCC14.Cluster2550       | 46.90 | Lactobacillales     | 177687 | 1867135 |
| Sample_LCC14.Cluster964        | 52.30 | Clostridiales       | 108958 | 2272042 |
| Sample_LCC14.mb.40             | 53.10 | Clostridiales       | 72073  | 2520225 |
| Sample_LCC14.mb.3              | 60.40 | Clostridiales       | 138871 | 2880441 |

|                                 |       |                    |        |         |
|---------------------------------|-------|--------------------|--------|---------|
| Sample_LCC14.mb.37              | 61.30 | Clostridiales      | 75898  | 2610633 |
| Sample_LCC14.mb.50cbin.1        | 49.50 | Clostridiales      | 8806   | 3972058 |
| Sample_LCC14.Cluster677cbin.1   | 60.70 | Bifidobacteriaceae | 5291   | 1912199 |
| Sample_LCC14.Cluster315cbin.1   | 56.10 | Clostridiales      | 15820  | 2547486 |
| Sample_LCC14.mb.58cbin.1        | 43.80 | Selenomonadales    | 9735   | 2178779 |
| Sample_LCC14.Cluster994         | 52.70 | Lactobacillales    | 45338  | 1800233 |
| Sample_LCC14.mb.10              | 60.60 | Clostridiales      | 45880  | 1786743 |
| Sample_LCC14.mb.23cbin.1        | 53.80 | Selenomonadales    | 36362  | 2336749 |
| Sample_LCC14.mb.42cbin.1        | 32.60 | Lactobacillales    | 122067 | 1921624 |
| Sample_LCC14.mb.83              | 34.50 | Lactobacillus      | 509809 | 1861909 |
| Sample_LCC14.mb.62cbin.1        | 59.40 | Clostridiales      | 92214  | 3029175 |
| Sample_LCC14.Cluster234         | 58.20 | Bacteroidetes      | 257562 | 3304664 |
| Sample_LCC14.mb.48cbin.1        | 41.80 | Lachnospiraceae    | 79622  | 2448517 |
| Sample_LCC14.mb.81cbin.1        | 62.50 | Clostridiales      | 12772  | 3273092 |
| Sample_LCC14.Cluster2264cbin.1  | 44.40 | Bacteroidales      | 89503  | 3109750 |
| Sample_LCC14.mb.14cbin.1        | 49.40 | Clostridiales      | 15899  | 6180614 |
| Sample_LCC14.Cluster2175        | 48.40 | Bacteroidales      | 260184 | 3594561 |
| Sample_LCC14.mb.64cbin.1        | 44.90 | Bacteroidales      | 58400  | 4713793 |
| Sample_LCC14.Cluster2329cbin.1  | 49.70 | Clostridiales      | 339032 | 5604247 |
| Sample_LCC14.mb.27              | 55.60 | Enterobacteriaceae | 40935  | 4551345 |
| Sample_LCC14.mb.72cbin.1        | 50.90 | Enterobacteriaceae | 17216  | 4450384 |
| Sample_LCC15.mb.27cbin.1        | 55.10 | Prevotella         | 20191  | 2356845 |
| Sample_LCC15.mb.14cbin.1        | 45.10 | Lachnospiraceae    | 5629   | 2078075 |
| Sample_LCC15.Cluster403cbin.1   | 56.80 | Bifidobacteriaceae | 15503  | 2029177 |
| Sample_LCC15.mb.9               | 51.00 | Enterobacteriaceae | 46438  | 4359194 |
| Sample_LCC16.mb.28              | 63.10 | Clostridiales      | 8834   | 1562527 |
| Sample_LCC16.Cluster1073cbin.1  | 47.70 | Clostridiales      | 97705  | 3025014 |
| Sample_LCC16.mb.15              | 43.50 | Selenomonadales    | 7882   | 2122874 |
| Sample_LCC16.mb.34cbin.1        | 52.10 | Clostridiales      | 36765  | 1716264 |
| Sample_LCC16.mb.29cbin.1        | 53.60 | Clostridiales      | 437506 | 1935031 |
| Sample_LCC16.Cluster2701cbin.1  | 40.70 | Clostridiales      | 135169 | 2106244 |
| Sample_LCC16.mb.5cbin.1         | 54.50 | Bacteroidetes      | 109598 | 2133792 |
| Sample_LCC16.mb.1cbin.1         | 56.20 | Clostridiales      | 15502  | 2578466 |
| Sample_LCC16.Cluster75cbin.1    | 57.00 | Bifidobacteriaceae | 109280 | 2161851 |
| Sample_LCC16.mb.25              | 35.90 | Clostridiales      | 142743 | 2446902 |
| Sample_LCC16.mb.32              | 43.50 | Lachnospiraceae    | 112269 | 2827473 |
| Sample_LCC16.Cluster2570        | 41.20 | Lachnospiraceae    | 69073  | 2865196 |
| Sample_LCC16.Cluster2870cbin.1  | 40.90 | Clostridiales      | 58941  | 3767556 |
| Sample_LCC16.mb.30              | 46.70 | Bacteroidales      | 39437  | 4007980 |
| Sample_LCC17.Cluster16446       | 26.60 | Bacteria           | 58879  | 1048374 |
| Sample_LCC17.Cluster16367       | 26.50 | Bacteria           | 175020 | 1208669 |
| Sample_LCC17.Cluster16722       | 25.10 | Bacteria           | 198093 | 1236943 |
| Sample_LCC17.Cluster15858       | 28.60 | Bacteria           | 11747  | 1272042 |
| Sample_LCC17.Cluster1862cbin.1  | 51.20 | Bacteria           | 6019   | 1627514 |
| Sample_LCC17.Cluster3097cbin.1  | 53.60 | Clostridiales      | 46692  | 1791276 |
| Sample_LCC17.Cluster15226cbin.1 | 36.50 | Clostridiales      | 232298 | 1881253 |
| Sample_LCC17.Cluster4190cbin.1  | 53.00 | Clostridia         | 81799  | 2019079 |
| Sample_LCC17.Cluster2315cbin.1  | 58.20 | Clostridiales      | 52586  | 2849393 |
| Sample_LCC17.Cluster180         | 62.10 | Clostridiales      | 15554  | 1432343 |
| Sample_LCC17.Cluster8838        | 45.70 | Bacteria           | 62019  | 1764064 |
| Sample_LCC17.Cluster12879       | 40.60 | Clostridiales      | 124750 | 1595916 |
| Sample_LCC17.Cluster3989cbin.1  | 49.00 | Clostridiales      | 114012 | 2477461 |
| Sample_LCC17.Cluster15123       | 33.60 | Clostridiales      | 74472  | 1874865 |
| Sample_LCC17.Cluster15926       | 31.20 | Euryarchaeota      | 39467  | 1697872 |
| Sample_LCC17.Cluster8364        | 45.70 | Clostridiales      | 48930  | 1899680 |
| Sample_LCC17.mb.12cbin.1        | 48.70 | Clostridiales      | 76958  | 2428149 |
| Sample_LCC17.Cluster317         | 60.10 | Bacteroidetes      | 30243  | 2688269 |
| Sample_LCC17.Cluster4955cbin.1  | 54.60 | Bacteroidetes      | 103045 | 2092421 |



|                                 |       |                     |        |         |
|---------------------------------|-------|---------------------|--------|---------|
| Sample_LCC17.Cluster4788cbin.1  | 38.60 | Clostridiales       | 49273  | 2157108 |
| Sample_LCC17.mb.131cbin.1       | 56.10 | Clostridiales       | 52438  | 2552052 |
| Sample_LCC17.mb.36cbin.1        | 41.30 | Clostridiales       | 223083 | 2530806 |
| Sample_LCC17.Cluster44cbin.1    | 63.90 | Deltaproteobacteria | 15002  | 2340089 |
| Sample_LCC17.mb.119             | 57.70 | Bacteria            | 15778  | 2306101 |
| Sample_LCC17.Cluster9633cbin.1  | 46.40 | Bacteroidetes       | 104640 | 2344611 |
| Sample_LCC17.mb.74              | 26.40 | Bacteria            | 104037 | 1275189 |
| Sample_LCC17.Cluster13321cbin.1 | 41.30 | Lachnospiraceae     | 64960  | 2910914 |
| Sample_LCC17.Cluster750cbin.1   | 59.60 | Bacteroidetes       | 88011  | 2668258 |
| Sample_LCC17.Cluster16120cbin.1 | 31.30 | Firmicutes          | 36380  | 2339585 |
| Sample_LCC17.mb.52cbin.1        | 57.80 | Clostridiales       | 6534   | 1747967 |
| Sample_LCC17.mb.25cbin.1        | 60.30 | Actinobacteria      | 10289  | 1918454 |
| Sample_LCC17.mb.53              | 62.80 | Clostridiales       | 13188  | 1746050 |
| Sample_LCC17.Cluster13753cbin.1 | 38.40 | Bacteroidales       | 65491  | 3358006 |
| Sample_LCC17.mb.59cbin.1        | 37.70 | Clostridiales       | 118891 | 2257500 |
| Sample_LCC17.mb.22              | 51.10 | Bacteroidetes       | 10137  | 2185682 |
| Sample_LCC17.mb.120             | 57.70 | Clostridiales       | 81530  | 2455685 |
| Sample_LCC17.Cluster11558cbin.1 | 43.30 | Bacteria            | 16316  | 3881562 |
| Sample_LCC17.mb.78              | 58.20 | Clostridiales       | 25619  | 2109503 |
| Sample_LCC17.mb.26              | 50.30 | Bacteroidales       | 106953 | 2299214 |
| Sample_LCC17.mb.68              | 44.80 | Clostridiales       | 62997  | 2591845 |
| Sample_LCC17.Cluster14361cbin.1 | 45.30 | Bacteroidales       | 8151   | 3647373 |
| Sample_LCC17.mb.86              | 46.20 | Clostridiales       | 9993   | 1937078 |
| Sample_LCC17.mb.67cbin.1        | 56.40 | Clostridiales       | 15693  | 2470625 |
| Sample_LCC17.mb.70              | 41.20 | Clostridiales       | 212707 | 2463723 |
| Sample_LCC17.mb.8cbin.1         | 46.30 | Lachnospiraceae     | 64768  | 2895875 |
| Sample_LCC17.mb.88              | 45.10 | Clostridiales       | 78905  | 1994029 |
| Sample_LCC17.mb.95cbin.1        | 59.90 | Bifidobacteriaceae  | 8997   | 1893531 |
| Sample_LCC17.mb.92cbin.1        | 51.40 | Clostridiales       | 122182 | 2134157 |
| Sample_LCC17.mb.94cbin.1        | 43.20 | Clostridiales       | 17859  | 2616266 |
| Sample_LCC17.mb.112cbin.1       | 46.80 | Bacteroidales       | 45366  | 4139891 |
| Sample_LCC17.mb.82              | 41.90 | Lachnospiraceae     | 24386  | 2241933 |
| Sample_LCC17.mb.73              | 44.20 | Bacteroidales       | 150978 | 3572399 |
| Sample_LCC19.mb.44              | 47.00 | Bacteria            | 53591  | 1679839 |
| Sample_LCC19.mb.64              | 26.10 | Bacteria            | 43110  | 1179770 |
| Sample_LCC19.Cluster45cbin.1    | 61.30 | Clostridiales       | 136849 | 2049424 |
| Sample_LCC19.Cluster2436cbin.1  | 47.70 | Clostridiales       | 83733  | 3006261 |
| Sample_LCC19.mb.43              | 49.00 | Clostridiales       | 30570  | 2498564 |
| Sample_LCC19.Cluster744cbin.1   | 54.70 | Bacteroidetes       | 155375 | 1936191 |
| Sample_LCC19.Cluster1101        | 53.70 | Clostridiales       | 569342 | 1805402 |
| Sample_LCC19.mb.35              | 56.60 | Clostridiales       | 13588  | 2259941 |
| Sample_LCC19.mb.48cbin.1        | 60.10 | Clostridiales       | 37733  | 1914861 |
| Sample_LCC19.Cluster24cbin.1    | 60.20 | Bifidobacteriaceae  | 6619   | 1849755 |
| Sample_LCC19.mb.19cbin.1        | 41.00 | Clostridiales       | 185157 | 2113602 |
| Sample_LCC19.Cluster3872cbin.1  | 42.90 | Clostridiales       | 82751  | 2386317 |
| Sample_LCC19.mb.17cbin.1        | 56.80 | Bifidobacteriaceae  | 154094 | 2154471 |
| Sample_LCC19.Cluster5834cbin.1  | 35.90 | Clostridiales       | 89126  | 2617018 |
| Sample_LCC19.mb.90cbin.1        | 63.70 | Actinobacteria      | 32329  | 2592483 |
| Sample_LCC19.mb.45              | 26.60 | Clostridiales       | 20483  | 2775106 |
| Sample_LCC19.mb.85cbin.1        | 43.90 | Lachnospiraceae     | 98577  | 2479340 |
| Sample_LCC19.Cluster1741        | 46.70 | Bacteroidales       | 127847 | 2806294 |
| Sample_LCC19.mb.49              | 42.30 | Bacteroidales       | 63606  | 3260087 |
| Sample_LCC19.Cluster3286cbin.1  | 41.70 | Lachnospiraceae     | 14866  | 3501988 |
| Sample_LCC19.mb.79              | 45.10 | Clostridiales       | 32467  | 2705470 |
| Sample_LCC19.mb.53cbin.1        | 38.10 | Lactobacillales     | 36245  | 2873056 |
| Sample_LCC19.Cluster1812cbin.1  | 44.90 | Bacteroidales       | 10445  | 3820169 |
| Sample_LCC19.mb.31cbin.1        | 50.70 | Enterobacteriaceae  | 151464 | 4702608 |
| Sample_LCC19.Cluster32          | 56.20 | Enterobacteriaceae  | 146518 | 5556779 |

|                                 |       |                    |        |         |
|---------------------------------|-------|--------------------|--------|---------|
| Sample_LCC20.Cluster10333       | 26.40 | Bacteria           | 127272 | 1080291 |
| Sample_LCC20.mb.3               | 26.00 | Bacteria           | 121358 | 1361878 |
| Sample_LCC20.Cluster8196cbin.1  | 37.50 | Clostridiales      | 141749 | 2062084 |
| Sample_LCC20.Cluster247cbin.1   | 60.90 | Clostridiales      | 87342  | 1922826 |
| Sample_LCC20.Cluster427cbin.1   | 58.30 | Clostridiales      | 39455  | 2379266 |
| Sample_LCC20.mb.57              | 53.00 | Clostridia         | 12188  | 1959606 |
| Sample_LCC20.mb.21              | 41.80 | Clostridiales      | 160795 | 2620320 |
| Sample_LCC20.mb.43cbin.1        | 61.00 | Clostridiales      | 15626  | 1638402 |
| Sample_LCC20.Cluster3708        | 49.90 | Clostridiales      | 146561 | 2307960 |
| Sample_LCC20.mb.60              | 58.00 | Clostridiales      | 45421  | 3008712 |
| Sample_LCC20.mb.44              | 62.00 | Clostridiales      | 24618  | 1954018 |
| Sample_LCC20.Cluster2912cbin.1  | 49.00 | Bacteroidales      | 180829 | 3007968 |
| Sample_LCC20.Cluster3319cbin.1  | 44.00 | Selenomonadales    | 13906  | 2207150 |
| Sample_LCC20.Cluster689cbin.1   | 50.90 | Prevotella         | 69771  | 2385043 |
| Sample_LCC20.Cluster5995        | 40.60 | Clostridiales      | 187098 | 1966520 |
| Sample_LCC20.mb.63              | 51.10 | Clostridiales      | 8841   | 1533973 |
| Sample_LCC20.mb.51              | 57.30 | Clostridiales      | 69682  | 1878435 |
| Sample_LCC20.mb.22              | 54.80 | Bacteroidetes      | 123145 | 2207280 |
| Sample_LCC20.mb.29cbin.1        | 44.60 | Clostridiales      | 152822 | 1908374 |
| Sample_LCC20.mb.75              | 54.80 | Clostridiales      | 17690  | 2514980 |
| Sample_LCC20.mb.32cbin.1        | 31.20 | Euryarchaeota      | 16951  | 1688181 |
| Sample_LCC20.mb.18              | 59.40 | Bacteroidetes      | 76372  | 2745648 |
| Sample_LCC20.mb.36cbin.1        | 37.70 | Clostridiales      | 37853  | 2395095 |
| Sample_LCC20.mb.56              | 56.40 | Clostridiales      | 15518  | 2436870 |
| Sample_LCC20.mb.92cbin.1        | 55.70 | Clostridiales      | 122130 | 2724602 |
| Sample_LCC20.Cluster5529        | 43.40 | Bacteroidales      | 265362 | 3076903 |
| Sample_LCC20.Cluster5535        | 43.00 | Bacteria           | 19180  | 3771591 |
| Sample_LCC20.mb.34cbin.1        | 42.30 | Bacteroidales      | 36561  | 4448720 |
| Sample_LCC20.mb.62              | 46.50 | Bacteroidales      | 35039  | 4241460 |
| Sample_LCC20.mb.94cbin.1        | 45.60 | Bacteroidales      | 20645  | 4552612 |
| Sample_LCC20.Cluster3175        | 50.90 | Enterobacteriaceae | 142896 | 4413562 |
| Sample_LCC20.Cluster625         | 57.70 | Enterobacteriaceae | 196991 | 4923684 |
| Sample_LCC21.Cluster13810cbin.1 | 26.70 | Bacteria           | 10369  | 1151845 |
| Sample_LCC21.Cluster163         | 59.60 | Actinobacteria     | 14043  | 1539610 |
| Sample_LCC21.mb.33cbin.1        | 53.80 | Clostridia         | 35991  | 1839666 |
| Sample_LCC21.mb.50cbin.1        | 33.00 | Bacteria           | 17057  | 1930349 |
| Sample_LCC21.mb.31              | 59.60 | Clostridiales      | 6639   | 1757709 |
| Sample_LCC21.Cluster4626        | 50.50 | Bacteroidales      | 69920  | 2259911 |
| Sample_LCC21.mb.43              | 60.70 | Clostridiales      | 67669  | 1858345 |
| Sample_LCC21.Cluster10978cbin.1 | 41.10 | Lachnospiraceae    | 111009 | 2835344 |
| Sample_LCC21.Cluster4492cbin.1  | 48.80 | Firmicutes         | 10169  | 1897352 |
| Sample_LCC21.Cluster5920        | 44.00 | Selenomonadales    | 35151  | 2084991 |
| Sample_LCC21.mb.104             | 54.00 | Clostridiales      | 74075  | 1708356 |
| Sample_LCC21.Cluster11322       | 40.90 | Clostridiales      | 189245 | 2034202 |
| Sample_LCC21.mb.92cbin.1        | 49.50 | Clostridiales      | 96854  | 2029867 |
| Sample_LCC21.Cluster5138cbin.1  | 51.40 | Clostridiales      | 123414 | 2187660 |
| Sample_LCC21.mb.79cbin.1        | 57.30 | Clostridiales      | 88002  | 1788525 |
| Sample_LCC21.mb.57cbin.1        | 60.30 | Actinobacteria     | 13633  | 2098748 |
| Sample_LCC21.mb.107cbin.1       | 43.50 | Clostridiales      | 180933 | 2886613 |
| Sample_LCC21.mb.46              | 44.50 | Clostridiales      | 119676 | 2246451 |
| Sample_LCC21.mb.70              | 59.90 | Clostridiales      | 11518  | 1968969 |
| Sample_LCC21.mb.75              | 45.10 | Clostridiales      | 55660  | 2518407 |
| Sample_LCC21.Cluster8966cbin.1  | 42.70 | Clostridiales      | 116436 | 2689955 |
| Sample_LCC21.Cluster1186cbin.1  | 58.00 | Bacteroidetes      | 110916 | 3261971 |
| Sample_LCC21.Cluster13247cbin.1 | 31.20 | Firmicutes         | 60672  | 2427478 |
| Sample_LCC21.Cluster9689cbin.1  | 40.10 | Lachnospiraceae    | 13451  | 3914383 |
| Sample_LCC21.mb.99cbin.1        | 56.00 | Clostridiales      | 5739   | 2323878 |
| Sample_LCC21.Cluster1714cbin.1  | 45.60 | Bacteroidales      | 8082   | 3657932 |

|                                |       |                    |        |         |
|--------------------------------|-------|--------------------|--------|---------|
| Sample_LCC21.mb.71cbin.1       | 50.80 | Enterobacteriaceae | 44369  | 4542110 |
| Sample_LCC22.Cluster11576      | 26.70 | Bacteria           | 118031 | 1185786 |
| Sample_LCC22.Cluster2424       | 50.80 | Bacteria           | 106097 | 1843502 |
| Sample_LCC22.mb.22cbin.1       | 49.50 | Clostridiales      | 18045  | 1867852 |
| Sample_LCC22.mb.27             | 32.80 | Bacteria           | 87603  | 1948482 |
| Sample_LCC22.mb.18cbin.1       | 58.10 | Clostridiales      | 50036  | 3097295 |
| Sample_LCC22.Cluster385        | 58.30 | Clostridiales      | 65266  | 2353634 |
| Sample_LCC22.mb.11cbin.1       | 58.20 | Clostridiales      | 53065  | 2171871 |
| Sample_LCC22.mb.40cbin.1       | 57.20 | Clostridiales      | 24196  | 2273061 |
| Sample_LCC22.Cluster128        | 59.60 | Actinobacteria     | 49431  | 2072281 |
| Sample_LCC22.mb.35             | 61.40 | Clostridiales      | 54210  | 2073283 |
| Sample_LCC22.Cluster6998       | 41.50 | Clostridiales      | 479723 | 1750722 |
| Sample_LCC22.Cluster3715       | 47.30 | Selenomonadales    | 84326  | 2132938 |
| Sample_LCC22.mb.47             | 50.10 | Clostridiales      | 15348  | 1971609 |
| Sample_LCC22.Cluster9158       | 39.00 | Clostridiales      | 102045 | 1862840 |
| Sample_LCC22.mb.16             | 58.90 | Clostridiales      | 32692  | 2145395 |
| Sample_LCC22.mb.46cbin.1       | 53.30 | Clostridiales      | 32704  | 2572860 |
| Sample_LCC22.mb.36             | 46.60 | Lachnospiraceae    | 58846  | 2711758 |
| Sample_LCC22.Cluster278        | 55.40 | Bacteria           | 317815 | 2726366 |
| Sample_LCC22.mb.2cbin.1        | 37.60 | Clostridiales      | 5830   | 2216621 |
| Sample_LCC22.Cluster8027cbin.1 | 42.90 | Clostridiales      | 94339  | 2672527 |
| Sample_LCC22.mb.19             | 41.80 | Lachnospiraceae    | 96833  | 2531047 |
| Sample_LCC22.mb.37             | 36.00 | Clostridiales      | 194952 | 2399557 |
| Sample_LCC22.mb.76             | 60.90 | Clostridiales      | 105022 | 1902040 |
| Sample_LCC22.Cluster6899cbin.1 | 42.10 | Bacteroidales      | 61728  | 3075818 |
| Sample_LCC22.mb.34cbin.1       | 45.40 | Prevotella         | 33602  | 3275529 |
| Sample_LCC22.mb.62cbin.1       | 55.10 | Bacteroidetes      | 32940  | 1922060 |
| Sample_LCC22.mb.58             | 61.60 | Proteobacteria     | 42060  | 2493468 |
| Sample_LCC22.mb.81cbin.1       | 61.30 | Clostridiales      | 11293  | 1900389 |
| Sample_LCC22.mb.31cbin.1       | 46.40 | Bacteroidales      | 62589  | 3070835 |
| Sample_LCC22.mb.29cbin.1       | 40.30 | Clostridiales      | 20546  | 4547770 |
| Sample_LCC22.Cluster8294cbin.1 | 41.90 | Bacteroidales      | 33602  | 3990865 |
| Sample_LCC22.mb.87             | 41.20 | Clostridiales      | 215984 | 2690050 |
| Sample_LCC22.mb.38             | 45.10 | Bacteroidales      | 79685  | 3772930 |
| Sample_LCC22.mb.50             | 45.40 | Bacteroidales      | 52515  | 4067759 |
| Sample_LCC22.mb.5cbin.1        | 43.00 | Bacteria           | 22390  | 4058288 |
| Sample_LCC22.mb.92cbin.1       | 48.90 | Bacteroidales      | 27608  | 3286438 |
| Sample_LCC22.mb.90cbin.1       | 50.60 | Enterobacteriaceae | 172256 | 4944108 |
| Sample_LCC23.mb.89cbin.1       | 41.20 | Bacteria           | 51479  | 3052442 |
| Sample_LCC23.mb.18cbin.1       | 58.90 | Clostridiales      | 11895  | 2544324 |
| Sample_LCC23.Cluster156        | 59.80 | Actinobacteria     | 134039 | 2094335 |
| Sample_LCC23.mb.47             | 60.00 | Clostridiales      | 85839  | 1911335 |
| Sample_LCC23.Cluster3cbin.1    | 63.20 | Actinobacteria     | 76747  | 2660295 |
| Sample_LCC23.Cluster976cbin.1  | 51.10 | Bacteroidales      | 57891  | 2573602 |
| Sample_LCC23.Cluster311cbin.1  | 55.60 | Bacteria           | 40136  | 2708885 |
| Sample_LCC23.Cluster8057       | 40.50 | Clostridiales      | 147176 | 2069494 |
| Sample_LCC23.mb.17             | 47.00 | Prevotella         | 27616  | 2106376 |
| Sample_LCC23.Cluster9143       | 38.20 | Clostridiales      | 190128 | 2024067 |
| Sample_LCC23.mb.93cbin.1       | 58.60 | Clostridiales      | 68618  | 1970759 |
| Sample_LCC23.mb.26             | 51.50 | Clostridiales      | 22069  | 2089028 |
| Sample_LCC23.mb.55             | 54.60 | Bacteroidetes      | 59879  | 2121625 |
| Sample_LCC23.Cluster44cbin.1   | 63.10 | Proteobacteria     | 37821  | 2599865 |
| Sample_LCC23.mb.19             | 28.20 | Bacteria           | 8439   | 2162299 |
| Sample_LCC23.mb.83cbin.1       | 47.30 | Selenomonadales    | 29044  | 2090088 |
| Sample_LCC23.Cluster7957cbin.1 | 44.70 | Clostridiales      | 86965  | 3030546 |
| Sample_LCC23.mb.54cbin.1       | 49.90 | Bacteroidales      | 78812  | 2259886 |
| Sample_LCC23.mb.57             | 43.70 | Lachnospiraceae    | 97976  | 2727078 |
| Sample_LCC23.mb.14             | 43.30 | Lachnospiraceae    | 32294  | 2788320 |

|                                |       |                    |        |         |
|--------------------------------|-------|--------------------|--------|---------|
| Sample_LCC23.mb.72cbin.1       | 55.20 | Bacteroidales      | 70848  | 2473125 |
| Sample_LCC23.mb.98             | 44.30 | Clostridiales      | 155471 | 2705418 |
| Sample_LCC23.mb.87cbin.1       | 57.80 | Clostridiales      | 29156  | 2502504 |
| Sample_LCC23.mb.6              | 41.60 | Lachnospiraceae    | 71322  | 3045259 |
| Sample_LCC23.mb.23cbin.1       | 45.40 | Bacteroidales      | 78399  | 3883496 |
| Sample_LCC23.Cluster310cbin.1  | 51.10 | Enterobacteriaceae | 18982  | 4248554 |
| Sample_LCC24.Cluster5757       | 34.30 | Clostridiales      | 6695   | 2031526 |
| Sample_LCC24.Cluster3364cbin.1 | 42.10 | Clostridiales      | 14729  | 2608979 |
| Sample_LCC24.Cluster82cbin.1   | 59.20 | Clostridiales      | 19635  | 1906918 |
| Sample_LCC24.Cluster946        | 51.50 | Clostridiales      | 23973  | 1953178 |
| Sample_LCC24.mb.18             | 60.00 | Actinobacteria     | 47004  | 2076100 |
| Sample_LCC24.mb.53cbin.1       | 48.80 | Clostridiales      | 15215  | 2630259 |
| Sample_LCC24.Cluster172cbin.1  | 53.60 | Lactobacillales    | 10325  | 1544350 |
| Sample_LCC24.Cluster78cbin.1   | 56.50 | Bifidobacteriaceae | 27436  | 1863987 |
| Sample_LCC24.mb.31             | 56.50 | Clostridiales      | 7434   | 2276301 |
| Sample_LCC24.mb.15             | 60.20 | Bacteroidetes      | 75610  | 2453016 |
| Sample_LCC24.mb.21             | 34.80 | Lactobacillus      | 18104  | 1798401 |
| Sample_LCC24.Cluster6435cbin.1 | 32.60 | Lactobacillales    | 133279 | 1871564 |
| Sample_LCC24.mb.23cbin.1       | 44.30 | Clostridiales      | 259354 | 2188687 |
| Sample_LCC24.Cluster44         | 62.40 | Proteobacteria     | 58827  | 2395041 |
| Sample_LCC24.mb.4              | 63.20 | Bifidobacteriaceae | 17867  | 2073397 |
| Sample_LCC24.mb.50cbin.1       | 54.20 | Selenomonadales    | 81225  | 2070432 |
| Sample_LCC24.Cluster2026cbin.1 | 46.00 | Bacteroidales      | 60409  | 2969450 |
| Sample_LCC24.mb.26             | 59.10 | Bacteroidetes      | 120531 | 2731636 |
| Sample_LCC24.Cluster4973cbin.1 | 41.20 | Clostridiales      | 19016  | 3448049 |
| Sample_LCC24.mb.42             | 58.70 | Bifidobacteriaceae | 17002  | 2295669 |
| Sample_LCC24.mb.40cbin.1       | 41.30 | Lachnospiraceae    | 111412 | 2989175 |
| Sample_LCC24.mb.60             | 31.30 | Firmicutes         | 10523  | 2124901 |
| Sample_LCC24.Cluster1831       | 45.60 | Bacteroidales      | 35351  | 3663298 |
| Sample_LCC25.mb.22cbin.1       | 48.30 | Clostridiales      | 24901  | 2964171 |
| Sample_LCC25.mb.1              | 49.40 | Clostridiales      | 8070   | 2309806 |
| Sample_LCC25.Cluster6741cbin.1 | 27.70 | Clostridiales      | 5091   | 1574839 |
| Sample_LCC25.mb.2              | 59.90 | Actinobacteria     | 28476  | 2098744 |
| Sample_LCC25.mb.31cbin.1       | 56.70 | Clostridiales      | 6080   | 2106863 |
| Sample_LCC25.mb.35             | 60.70 | Clostridiales      | 64611  | 2191771 |
| Sample_LCC25.Cluster2894       | 43.40 | Selenomonadales    | 250365 | 2379498 |
| Sample_LCC25.Cluster5887       | 36.00 | Clostridiales      | 16077  | 2068474 |
| Sample_LCC25.mb.12             | 40.90 | Clostridiales      | 164767 | 2289660 |
| Sample_LCC25.mb.3cbin.1        | 59.80 | Bacteroidetes      | 12225  | 2720599 |
| Sample_LCC25.mb.73             | 54.80 | Bacteroidetes      | 136011 | 2020029 |
| Sample_LCC25.Cluster1411cbin.1 | 45.50 | Prevotella         | 34339  | 3120550 |
| Sample_LCC25.mb.37cbin.1       | 41.00 | Lachnospiraceae    | 72746  | 2914305 |
| Sample_LCC25.Cluster4290       | 42.80 | Lachnospiraceae    | 98857  | 2996292 |
| Sample_LCC25.Cluster6913       | 29.10 | Bacteria           | 59993  | 2596339 |
| Sample_LCC25.mb.5cbin.1        | 60.10 | Bifidobacteriaceae | 236859 | 2425739 |
| Sample_LCC25.Cluster2423cbin.1 | 44.50 | Bacteroidales      | 97389  | 3094687 |
| Sample_LCC25.Cluster2907cbin.1 | 41.20 | Lachnospiraceae    | 58350  | 3532062 |
| Sample_LCC25.mb.59cbin.1       | 31.10 | Firmicutes         | 56810  | 2530287 |
| Sample_LCC25.Cluster976cbin.1  | 42.10 | Bacteroidales      | 41036  | 3909322 |
| Sample_LCC25.mb.21cbin.1       | 50.80 | Enterobacteriaceae | 70697  | 4625324 |
| Sample_LPA01.Cluster5570cbin.1 | 41.30 | Clostridiales      | 13000  | 2969978 |
| Sample_LPA01.Cluster9393       | 36.40 | Clostridiales      | 157196 | 1897292 |
| Sample_LPA01.Cluster3463cbin.1 | 45.90 | Clostridiales      | 77571  | 2193194 |
| Sample_LPA01.mb.8              | 60.10 | Bacteria           | 40000  | 2593780 |
| Sample_LPA01.mb.54             | 33.30 | Clostridiales      | 72776  | 1986479 |
| Sample_LPA01.Cluster1315cbin.1 | 48.50 | Firmicutes         | 32405  | 1938690 |
| Sample_LPA01.Cluster658cbin.1  | 54.70 | Bacteroidetes      | 104484 | 2029274 |
| Sample_LPA01.Cluster90cbin.1   | 60.00 | Clostridiales      | 139335 | 2984495 |

|                                 |       |                    |        |         |
|---------------------------------|-------|--------------------|--------|---------|
| Sample_LPA01.mb.57cbin.1        | 59.40 | Clostridiales      | 9209   | 1832901 |
| Sample_LPA01.Cluster9888        | 33.70 | Clostridiales      | 60132  | 1777250 |
| Sample_LPA01.mb.13              | 60.40 | Clostridiales      | 23002  | 2282811 |
| Sample_LPA01.mb.27cbin.1        | 56.40 | Clostridiales      | 14740  | 2428931 |
| Sample_LPA01.mb.87cbin.1        | 58.40 | Clostridiales      | 39234  | 2809633 |
| Sample_LPA01.mb.61cbin.1        | 49.40 | Clostridiales      | 18803  | 2376057 |
| Sample_LPA01.mb.21cbin.1        | 57.70 | Proteobacteria     | 18169  | 2196229 |
| Sample_LPA01.mb.78cbin.1        | 48.40 | Clostridiales      | 42391  | 2729227 |
| Sample_LPA01.Cluster9248cbin.1  | 35.90 | Clostridiales      | 187298 | 2539375 |
| Sample_LPA01.Cluster10199cbin.1 | 31.30 | Firmicutes         | 51736  | 2359315 |
| Sample_LPA01.mb.74              | 60.10 | Actinobacteria     | 35205  | 2028582 |
| Sample_LPA01.mb.34              | 57.90 | Bacteria           | 28065  | 2950458 |
| Sample_LPA01.mb.67              | 47.00 | Lachnospiraceae    | 81242  | 2987414 |
| Sample_LPA01.mb.15cbin.1        | 43.20 | Lachnospiraceae    | 123820 | 2920672 |
| Sample_LPA01.mb.16              | 41.50 | Lachnospiraceae    | 73199  | 2717299 |
| Sample_LPA01.Cluster1542cbin.1  | 48.80 | Bacteroidales      | 40992  | 3306394 |
| Sample_LPA01.mb.23              | 43.30 | Bacteroidales      | 183514 | 2936682 |
| Sample_LPA01.mb.20cbin.1        | 48.50 | Proteobacteria     | 37817  | 2639660 |
| Sample_LPA01.mb.81cbin.1        | 42.90 | Clostridiales      | 112447 | 2655099 |
| Sample_LPA01.Cluster3577cbin.1  | 45.10 | Bacteroidales      | 88478  | 4472020 |
| Sample_LPA01.mb.101             | 45.50 | Bacteroidales      | 38822  | 3746891 |
| Sample_LPA01.mb.90              | 58.80 | Bacteroidetes      | 137942 | 2937546 |
| Sample_LPA02.Cluster15863       | 24.80 | Bacteria           | 96892  | 1347461 |
| Sample_LPA02.Cluster6186        | 43.80 | Clostridiales      | 7660   | 2368573 |
| Sample_LPA02.Cluster7901        | 45.30 | Clostridiales      | 129966 | 1833521 |
| Sample_LPA02.Cluster4739cbin.1  | 48.80 | Clostridiales      | 14183  | 2613055 |
| Sample_LPA02.Cluster184cbin.1   | 58.70 | Clostridiales      | 40366  | 2184193 |
| Sample_LPA02.Cluster3382        | 53.50 | Clostridiales      | 249481 | 1941610 |
| Sample_LPA02.Cluster5710        | 43.80 | Selenomonadales    | 129540 | 2274173 |
| Sample_LPA02.mb.63              | 26.70 | Bacteria           | 257512 | 1150263 |
| Sample_LPA02.Cluster2508cbin.1  | 56.40 | Bifidobacteriaceae | 154544 | 2157522 |
| Sample_LPA02.mb.101             | 59.00 | Bacteroidetes      | 10969  | 2238003 |
| Sample_LPA02.mb.103cbin.1       | 49.70 | Bacteroidales      | 58010  | 2652478 |
| Sample_LPA02.mb.116             | 46.60 | Clostridiales      | 23095  | 2129579 |
| Sample_LPA02.mb.104cbin.1       | 51.00 | Clostridiales      | 132835 | 2333458 |
| Sample_LPA02.mb.36              | 57.10 | Clostridiales      | 63172  | 1915877 |
| Sample_LPA02.mb.129             | 38.90 | Clostridiales      | 28032  | 2003373 |
| Sample_LPA02.mb.57              | 62.00 | Clostridiales      | 28707  | 1968940 |
| Sample_LPA02.mb.97              | 49.90 | Clostridia         | 75375  | 1555585 |
| Sample_LPA02.mb.17              | 41.90 | Clostridiales      | 149679 | 2376669 |
| Sample_LPA02.mb.16              | 44.00 | Clostridiales      | 188721 | 2768835 |
| Sample_LPA02.mb.45cbin.1        | 62.60 | Bifidobacteriaceae | 100689 | 2116845 |
| Sample_LPA02.mb.39              | 46.70 | Lachnospiraceae    | 50641  | 3274027 |
| Sample_LPA02.mb.44              | 54.90 | Bacteroidetes      | 30565  | 2359717 |
| Sample_LPA02.mb.88              | 60.10 | Actinobacteria     | 13846  | 1992417 |
| Sample_LPA02.mb.52              | 46.20 | Prevotella         | 42920  | 2896029 |
| Sample_LPA02.mb.28              | 45.90 | Bacteroidales      | 74642  | 2764086 |
| Sample_LPA02.mb.81              | 44.80 | Clostridiales      | 24087  | 2441709 |
| Sample_LPA02.mb.83              | 44.60 | Clostridiales      | 130086 | 2280757 |
| Sample_LPA02.mb.59              | 41.80 | Lachnospiraceae    | 60478  | 2416341 |
| Sample_LPA02.mb.91              | 40.70 | Clostridiales      | 74399  | 2090852 |
| Sample_LPA02.mb.80cbin.1        | 50.20 | Lachnospiraceae    | 10895  | 2615955 |
| Sample_LPA02.mb.92              | 42.00 | Clostridiales      | 34055  | 2848046 |
| Sample_LPA02.Cluster2225cbin.1  | 50.70 | Enterobacteriaceae | 26032  | 4644976 |
| Sample_LPA02.mb.50cbin.1        | 44.90 | Bacteroidales      | 78110  | 4871522 |
| Sample_LPA03.mb.38              | 25.20 | Bacteria           | 154057 | 1294474 |
| Sample_LPA03.mb.44              | 26.00 | Bacteria           | 76863  | 1249024 |
| Sample_LPA03.mb.48              | 26.40 | Bacteria           | 145734 | 1229322 |

|                                 |       |                     |        |         |
|---------------------------------|-------|---------------------|--------|---------|
| Sample_LPA03.mb.24              | 53.60 | Clostridia          | 36084  | 1889418 |
| Sample_LPA03.mb.52              | 25.80 | Bacteria            | 52101  | 1374625 |
| Sample_LPA03.mb.36              | 52.70 | Clostridia          | 112149 | 2112493 |
| Sample_LPA03.mb.21              | 49.40 | Clostridiales       | 74708  | 2003078 |
| Sample_LPA03.mb.15              | 58.50 | Clostridiales       | 39651  | 2487693 |
| Sample_LPA03.mb.7               | 24.30 | Bacteria            | 48086  | 1036057 |
| Sample_LPA03.Cluster989cbin.1   | 53.70 | Clostridiales       | 11394  | 2058283 |
| Sample_LPA03.Cluster907cbin.1   | 57.10 | Clostridia          | 124555 | 4064562 |
| Sample_LPA03.mb.55cbin.1        | 54.90 | Clostridia          | 213734 | 2686883 |
| Sample_LPA03.mb.66              | 46.70 | Clostridiales       | 12503  | 1851554 |
| Sample_LPA03.mb.42cbin.1        | 62.10 | Clostridiales       | 84679  | 1862625 |
| Sample_LPA03.Cluster245cbin.1   | 58.60 | Clostridiales       | 42274  | 2341336 |
| Sample_LPA03.mb.30              | 42.90 | Clostridiales       | 12969  | 3000735 |
| Sample_LPA03.mb.23cbin.1        | 40.10 | Clostridiales       | 6440   | 3442770 |
| Sample_LPA03.mb.67              | 57.30 | Clostridiales       | 74193  | 1911328 |
| Sample_LPA03.Cluster2348        | 51.80 | Clostridiales       | 134557 | 2134921 |
| Sample_LPA03.Cluster1473        | 55.60 | Bacteria            | 225702 | 2693238 |
| Sample_LPA03.mb.10cbin.1        | 38.60 | Clostridiales       | 120194 | 2212691 |
| Sample_LPA03.mb.57cbin.1        | 41.00 | Clostridiales       | 46457  | 1961275 |
| Sample_LPA03.mb.53              | 58.70 | Clostridiales       | 36380  | 2969992 |
| Sample_LPA03.mb.40              | 58.50 | Bifidobacteriaceae  | 165613 | 2462598 |
| Sample_LPA03.mb.17cbin.1        | 43.20 | Bacteria            | 13862  | 3977834 |
| Sample_LPA03.Cluster5054cbin.1  | 39.00 | Lachnospiraceae     | 9057   | 3768190 |
| Sample_LPA03.mb.50cbin.1        | 57.60 | Enterobacteriaceae  | 52788  | 5241037 |
| Sample_LPA04.Cluster13204       | 28.60 | Bacteria            | 14481  | 1352163 |
| Sample_LPA04.Cluster7577        | 47.20 | Clostridiales       | 165011 | 1560380 |
| Sample_LPA04.mb.3               | 52.80 | Clostridia          | 68479  | 2152907 |
| Sample_LPA04.Cluster724         | 55.10 | Clostridia          | 201332 | 2660834 |
| Sample_LPA04.mb.54cbin.1        | 26.10 | Bacteria            | 51241  | 1197535 |
| Sample_LPA04.Cluster12181cbin.1 | 36.50 | Clostridiales       | 7972   | 2107251 |
| Sample_LPA04.mb.23              | 69.20 | Bacteria            | 30586  | 2206631 |
| Sample_LPA04.mb.52cbin.1        | 62.10 | Clostridia          | 248839 | 1872101 |
| Sample_LPA04.Cluster612cbin.1   | 60.60 | Clostridiales       | 41835  | 1806812 |
| Sample_LPA04.mb.58              | 51.00 | Clostridiales       | 14409  | 2071798 |
| Sample_LPA04.mb.16              | 58.40 | Bacteria            | 8273   | 2112271 |
| Sample_LPA04.mb.19              | 62.40 | Clostridiales       | 39894  | 2559405 |
| Sample_LPA04.mb.76              | 53.50 | Clostridia          | 64897  | 1854336 |
| Sample_LPA04.mb.79cbin.1        | 43.00 | Clostridiales       | 112144 | 1259910 |
| Sample_LPA04.mb.51              | 56.70 | Clostridiales       | 38022  | 2496059 |
| Sample_LPA04.mb.75              | 47.10 | Clostridiales       | 16449  | 1919620 |
| Sample_LPA04.Cluster5076        | 43.60 | Selenomonadales     | 47138  | 2103651 |
| Sample_LPA04.mb.63              | 62.30 | Clostridiales       | 6387   | 1564697 |
| Sample_LPA04.Cluster1103cbin.1  | 58.70 | Bacteria            | 99354  | 2650774 |
| Sample_LPA04.mb.59              | 59.10 | Clostridiales       | 21974  | 2175211 |
| Sample_LPA04.mb.37              | 48.50 | Proteobacteria      | 28338  | 1635647 |
| Sample_LPA04.Cluster3136        | 55.50 | Bacteria            | 127223 | 2795287 |
| Sample_LPA04.mb.72              | 59.80 | Clostridiales       | 16879  | 2285023 |
| Sample_LPA04.mb.57              | 60.20 | Actinobacteria      | 40251  | 2111972 |
| Sample_LPA04.Cluster12331       | 37.40 | Clostridiales       | 67519  | 2426442 |
| Sample_LPA04.mb.30              | 44.10 | Clostridiales       | 92327  | 2738535 |
| Sample_LPA04.mb.80              | 38.00 | Clostridiales       | 10014  | 3421146 |
| Sample_LPA04.mb.42cbin.1        | 63.80 | Deltaproteobacteria | 19844  | 2560682 |
| Sample_LPA04.mb.87              | 53.50 | Clostridiales       | 31512  | 1928492 |
| Sample_LPA04.mb.70              | 36.80 | Clostridiales       | 10412  | 1741051 |
| Sample_LPA04.Cluster1856        | 58.30 | Bacteroidetes       | 141099 | 3096996 |
| Sample_LPA04.Cluster9609        | 43.40 | Bacteroidales       | 289886 | 3040453 |
| Sample_LPA04.mb.92cbin.1        | 31.10 | Euryarchaeota       | 17368  | 1743199 |
| Sample_LPA04.Cluster8097cbin.1  | 42.00 | Lachnospiraceae     | 50020  | 3757709 |

|                                 |       |                     |        |         |
|---------------------------------|-------|---------------------|--------|---------|
| Sample_LPA04.mb.95cbin.1        | 47.20 | Bacteroidales       | 33481  | 3617873 |
| Sample_LPA04.mb.5cbin.1         | 45.70 | Bacteroidales       | 15230  | 3828141 |
| Sample_LPA04.Cluster7322cbin.1  | 45.20 | Bacteroidales       | 115884 | 4612647 |
| Sample_LPA04.mb.2               | 50.60 | Enterobacteriaceae  | 183654 | 4544448 |
| Sample_LPA05.mb.13              | 26.00 | Bacteria            | 35872  | 1263127 |
| Sample_LPA05.mb.17              | 46.50 | Bacteria            | 41777  | 1768719 |
| Sample_LPA05.Cluster12739cbin.1 | 37.40 | Clostridiales       | 7707   | 2193651 |
| Sample_LPA05.Cluster2994cbin.1  | 48.70 | Clostridiales       | 10998  | 2662497 |
| Sample_LPA05.Cluster147cbin.1   | 58.90 | Clostridiales       | 6013   | 2536983 |
| Sample_LPA05.Cluster1752cbin.1  | 61.40 | Clostridiales       | 12820  | 2143222 |
| Sample_LPA05.mb.3               | 58.00 | Clostridiales       | 42700  | 3150750 |
| Sample_LPA05.Cluster11436cbin.1 | 43.50 | Selenomonadales     | 12506  | 2157678 |
| Sample_LPA05.mb.44cbin.1        | 56.80 | Clostridiales       | 16653  | 2544614 |
| Sample_LPA05.mb.16              | 48.80 | Bacteria            | 10248  | 2332959 |
| Sample_LPA05.mb.38cbin.1        | 53.00 | Clostridiales       | 9827   | 1953010 |
| Sample_LPA05.mb.22              | 60.10 | Actinobacteria      | 19095  | 2064272 |
| Sample_LPA05.Cluster10884       | 40.90 | Clostridiales       | 120053 | 2150544 |
| Sample_LPA05.mb.46              | 40.90 | Lachnospiraceae     | 122978 | 2636133 |
| Sample_LPA05.Cluster625cbin.1   | 56.40 | Bifidobacteriaceae  | 313284 | 2199216 |
| Sample_LPA05.Cluster223cbin.1   | 55.90 | Proteobacteria      | 4691   | 1871583 |
| Sample_LPA05.Cluster8593        | 44.00 | Clostridiales       | 213452 | 2884193 |
| Sample_LPA05.mb.62cbin.1        | 61.50 | Clostridiales       | 30715  | 2545910 |
| Sample_LPA05.mb.50cbin.1        | 61.60 | Clostridiales       | 10262  | 3191661 |
| Sample_LPA05.mb.55              | 56.50 | Clostridiales       | 9330   | 2360873 |
| Sample_LPA05.mb.2               | 41.60 | Lachnospiraceae     | 71660  | 2682609 |
| Sample_LPA05.mb.45cbin.1        | 50.60 | Lachnospiraceae     | 19335  | 2430045 |
| Sample_LPA05.mb.59cbin.1        | 60.00 | Bifidobacteriaceae  | 47893  | 2316093 |
| Sample_LPA05.mb.25              | 43.30 | Bacteroidales       | 118359 | 2850349 |
| Sample_LPA05.mb.14cbin.1        | 48.80 | Bacteroidales       | 34270  | 3451840 |
| Sample_LPA05.Cluster3925cbin.1  | 45.30 | Bacteroidales       | 29398  | 3933288 |
| Sample_LPA05.mb.84              | 58.50 | Bacteroidetes       | 230911 | 3119840 |
| Sample_LPA08.mb.35cbin.1        | 42.10 | Bacteria            | 87281  | 4611181 |
| Sample_LPA08.mb.19              | 33.60 | Clostridiales       | 23524  | 2132107 |
| Sample_LPA08.Cluster126cbin.1   | 55.10 | Clostridiales       | 27518  | 2386730 |
| Sample_LPA08.Cluster13cbin.1    | 60.90 | Clostridiales       | 16530  | 1735306 |
| Sample_LPA08.Cluster103         | 57.90 | Clostridiales       | 69946  | 2127697 |
| Sample_LPA08.mb.41              | 61.40 | Clostridiales       | 31914  | 1915701 |
| Sample_LPA08.mb.34cbin.1        | 61.60 | Clostridiales       | 144098 | 2082147 |
| Sample_LPA08.mb.43              | 60.80 | Clostridiales       | 79066  | 2389130 |
| Sample_LPA08.mb.65cbin.1        | 38.00 | Clostridiales       | 29257  | 3589409 |
| Sample_LPA08.Cluster1168cbin.1  | 54.20 | Bacteroidetes       | 161273 | 2106750 |
| Sample_LPA08.Cluster449         | 53.70 | Clostridiales       | 260894 | 1860583 |
| Sample_LPA08.Cluster3810cbin.1  | 43.40 | Selenomonadales     | 148610 | 2505766 |
| Sample_LPA08.mb.30cbin.1        | 40.60 | Clostridiales       | 237346 | 2110332 |
| Sample_LPA08.Cluster818cbin.1   | 54.20 | Selenomonadales     | 86732  | 2160488 |
| Sample_LPA08.mb.23cbin.1        | 56.50 | Bifidobacteriaceae  | 35984  | 2019408 |
| Sample_LPA08.Cluster111cbin.1   | 59.00 | Bacteroidetes       | 133533 | 2906612 |
| Sample_LPA08.mb.63              | 46.40 | Lachnospiraceae     | 34416  | 2923094 |
| Sample_LPA08.mb.67              | 60.70 | Clostridiales       | 26397  | 2219831 |
| Sample_LPA08.mb.17              | 42.80 | Clostridiales       | 95012  | 2649601 |
| Sample_LPA08.mb.37              | 29.00 | Bacteria            | 48443  | 2678454 |
| Sample_LPA08.Cluster2626cbin.1  | 43.20 | Bacteroidales       | 5902   | 2440315 |
| Sample_LPA08.mb.47              | 32.60 | Lactobacillales     | 19866  | 1948170 |
| Sample_LPA08.Cluster24cbin.1    | 60.10 | Deltaproteobacteria | 18482  | 3822488 |
| Sample_LPA08.mb.49              | 50.20 | Bacteroidales       | 97930  | 2472130 |
| Sample_LPA08.Cluster5160cbin.1  | 40.80 | Lachnospiraceae     | 67726  | 3170039 |
| Sample_LPA08.Cluster2236cbin.1  | 41.80 | Lachnospiraceae     | 63558  | 2516711 |
| Sample_LPA08.Cluster548cbin.1   | 48.20 | Proteobacteria      | 20450  | 2730176 |

|                                 |       |                    |        |         |
|---------------------------------|-------|--------------------|--------|---------|
| Sample_LPA08.Cluster1301        | 45.20 | Bacteroidales      | 136547 | 4072813 |
| Sample_LPB01.Cluster213cbin.1   | 59.80 | Clostridiales      | 150223 | 2018897 |
| Sample_LPB01.mb.30cbin.1        | 59.40 | Clostridiales      | 6545   | 1729568 |
| Sample_LPB01.mb.21cbin.1        | 33.60 | Clostridiales      | 150184 | 3703948 |
| Sample_LPB01.mb.41              | 61.50 | Clostridiales      | 16364  | 2411693 |
| Sample_LPB01.Cluster1684cbin.1  | 48.40 | Firmicutes         | 20994  | 1677897 |
| Sample_LPB01.mb.63cbin.1        | 48.70 | Clostridiales      | 10938  | 2463713 |
| Sample_LPB01.mb.84              | 36.30 | Clostridiales      | 472273 | 1886670 |
| Sample_LPB01.Cluster3819cbin.1  | 46.70 | Lachnospiraceae    | 76514  | 3413028 |
| Sample_LPB01.mb.27              | 54.60 | Bacteroidetes      | 114740 | 2004787 |
| Sample_LPB01.Cluster1675        | 51.00 | Clostridiales      | 150109 | 2293771 |
| Sample_LPB01.Cluster5666        | 43.40 | Lachnospiraceae    | 153570 | 2375497 |
| Sample_LPB01.mb.22              | 41.20 | Clostridiales      | 150727 | 2495592 |
| Sample_LPB01.mb.59cbin.1        | 33.70 | Clostridiales      | 52493  | 2031509 |
| Sample_LPB01.mb.61cbin.1        | 56.50 | Clostridiales      | 13253  | 2403089 |
| Sample_LPB01.Cluster9682        | 36.10 | Clostridiales      | 131250 | 2601528 |
| Sample_LPB01.Cluster1317cbin.1  | 58.90 | Bacteroidetes      | 27997  | 2940279 |
| Sample_LPB01.Cluster7622cbin.1  | 41.10 | Lachnospiraceae    | 79104  | 3062554 |
| Sample_LPB01.Cluster10035       | 31.30 | Firmicutes         | 45980  | 2283257 |
| Sample_LPB01.mb.18              | 43.30 | Bacteroidales      | 181281 | 2949958 |
| Sample_LPB01.Cluster4014cbin.1  | 43.00 | Bacteria           | 14453  | 3792122 |
| Sample_LPB01.Cluster1905cbin.1  | 48.60 | Bacteroidales      | 46540  | 3335621 |
| Sample_LPB01.mb.95              | 29.60 | Bacteria           | 17982  | 2455533 |
| Sample_LPB01.mb.42              | 41.60 | Clostridiales      | 24756  | 3264891 |
| Sample_LPB01.mb.94cbin.1        | 43.40 | Clostridiales      | 128931 | 2516644 |
| Sample_LPB01.Cluster1739cbin.1  | 45.00 | Bacteroidales      | 39382  | 4113223 |
| Sample_LPB01.mb.75              | 59.10 | Bacteroidetes      | 128162 | 3149001 |
| Sample_LPB02.Cluster13993       | 36.50 | Clostridiales      | 200166 | 1770897 |
| Sample_LPB02.Cluster7087        | 45.30 | Clostridiales      | 97171  | 1826822 |
| Sample_LPB02.Cluster1263cbin.1  | 58.60 | Clostridiales      | 13984  | 2662996 |
| Sample_LPB02.Cluster10625cbin.1 | 45.50 | Clostridiales      | 159676 | 2173839 |
| Sample_LPB02.mb.18cbin.1        | 26.70 | Bacteria           | 93037  | 1031817 |
| Sample_LPB02.Cluster215cbin.1   | 56.00 | Bacteria           | 7243   | 2214538 |
| Sample_LPB02.Cluster3912cbin.1  | 49.70 | Bacteroidales      | 75106  | 2632284 |
| Sample_LPB02.Cluster10803cbin.1 | 41.90 | Clostridiales      | 168898 | 2334603 |
| Sample_LPB02.Cluster440         | 60.50 | Bifidobacteriaceae | 116262 | 1878911 |
| Sample_LPB02.Cluster5269cbin.1  | 44.80 | Prevotella         | 16907  | 2906901 |
| Sample_LPB02.Cluster12684       | 38.40 | Clostridiales      | 103826 | 2686419 |
| Sample_LPB02.Cluster4672        | 49.50 | Lachnospiraceae    | 65399  | 2794955 |
| Sample_LPB02.mb.116             | 53.70 | Clostridiales      | 210324 | 1885226 |
| Sample_LPB02.Cluster13006cbin.1 | 36.10 | Clostridiales      | 111806 | 3270796 |
| Sample_LPB02.Cluster5645cbin.1  | 46.10 | Bacteroidales      | 91464  | 2804211 |
| Sample_LPB02.mb.117             | 59.50 | Clostridiales      | 22537  | 2401460 |
| Sample_LPB02.mb.32              | 58.90 | Clostridiales      | 21801  | 2009811 |
| Sample_LPB02.mb.28cbin.1        | 48.30 | Clostridiales      | 105148 | 2830124 |
| Sample_LPB02.mb.111             | 44.60 | Clostridiales      | 153646 | 2226335 |
| Sample_LPB02.Cluster9005cbin.1  | 41.70 | Lachnospiraceae    | 63777  | 2505950 |
| Sample_LPB02.mb.126             | 54.40 | Bacteroidetes      | 57870  | 2193890 |
| Sample_LPB02.mb.129             | 40.60 | Clostridiales      | 126288 | 2141543 |
| Sample_LPB02.mb.56              | 41.80 | Lachnospiraceae    | 146663 | 2014493 |
| Sample_LPB02.Cluster4541cbin.1  | 43.20 | Bacteria           | 10999  | 3590476 |
| Sample_LPB02.mb.48              | 60.30 | Actinobacteria     | 8304   | 1911110 |
| Sample_LPB02.mb.134             | 35.90 | Clostridiales      | 184037 | 2286831 |
| Sample_LPB02.mb.33cbin.1        | 44.10 | Selenomonadales    | 129540 | 2103317 |
| Sample_LPB02.mb.47              | 38.80 | Clostridiales      | 73586  | 1902667 |
| Sample_LPB02.mb.67              | 46.30 | Clostridiales      | 36887  | 2581119 |
| Sample_LPB02.Cluster5495        | 45.30 | Bacteroidales      | 85080  | 3824745 |
| Sample_LPB02.mb.89              | 62.30 | Clostridiales      | 42563  | 1818318 |



|                                 |       |                     |        |         |
|---------------------------------|-------|---------------------|--------|---------|
| Sample_LPB02.mb.86              | 56.70 | Clostridiales       | 41486  | 2469025 |
| Sample_LPB02.mb.26cbin.1        | 38.50 | Lachnospiraceae     | 33031  | 2563012 |
| Sample_LPB02.mb.96cbin.1        | 58.30 | Clostridiales       | 16021  | 1926500 |
| Sample_LPB02.mb.57cbin.1        | 50.40 | Bacteroidales       | 76969  | 2359929 |
| Sample_LPB02.mb.49              | 36.30 | Clostridiales       | 134981 | 2523467 |
| Sample_LPB02.mb.51              | 49.40 | Proteobacteria      | 16871  | 2122919 |
| Sample_LPB02.mb.4               | 45.50 | Clostridiales       | 60921  | 2980394 |
| Sample_LPB02.mb.68              | 59.10 | Bacteroidetes       | 85560  | 2988255 |
| Sample_LPB02.mb.62              | 42.10 | Lachnospiraceae     | 13177  | 2147424 |
| Sample_LPB02.mb.83              | 42.00 | Bacteroidales       | 29527  | 4324194 |
| Sample_LPB03.mb.17              | 27.20 | Bacteria            | 260662 | 994960  |
| Sample_LPB03.mb.18              | 24.30 | Bacteria            | 53883  | 989306  |
| Sample_LPB03.mb.24              | 26.50 | Bacteria            | 94410  | 1184989 |
| Sample_LPB03.Cluster8614cbin.1  | 37.00 | Clostridiales       | 6532   | 1801825 |
| Sample_LPB03.Cluster557cbin.1   | 54.80 | Clostridia          | 182971 | 2746766 |
| Sample_LPB03.mb.38              | 53.70 | Clostridia          | 28044  | 1713524 |
| Sample_LPB03.Cluster949cbin.1   | 58.20 | Clostridiales       | 46155  | 2864803 |
| Sample_LPB03.mb.4               | 46.70 | Clostridiales       | 24126  | 1522689 |
| Sample_LPB03.Cluster155         | 59.40 | Clostridiales       | 14887  | 1970493 |
| Sample_LPB03.mb.13              | 60.40 | Clostridiales       | 64814  | 1783019 |
| Sample_LPB03.mb.71cbin.1        | 25.20 | Bacteria            | 154057 | 1295902 |
| Sample_LPB03.mb.61              | 49.20 | Clostridia          | 13040  | 1313559 |
| Sample_LPB03.mb.53cbin.1        | 53.70 | Clostridiales       | 10059  | 1963987 |
| Sample_LPB03.Cluster637cbin.1   | 56.70 | Clostridiales       | 84316  | 1974218 |
| Sample_LPB03.Cluster4384cbin.1  | 46.60 | Lachnospiraceae     | 6678   | 2106854 |
| Sample_LPB03.mb.39              | 54.10 | Actinobacteria      | 104900 | 1623313 |
| Sample_LPB03.mb.74              | 25.70 | Bacteria            | 52101  | 1393834 |
| Sample_LPB03.mb.48              | 38.30 | Clostridiales       | 66725  | 3090723 |
| Sample_LPB03.mb.27              | 59.80 | Actinobacteria      | 183497 | 2321320 |
| Sample_LPB03.Cluster2870        | 52.80 | Clostridiales       | 184996 | 2197660 |
| Sample_LPB03.mb.79              | 49.40 | Clostridiales       | 71288  | 1910180 |
| Sample_LPB03.Cluster2773cbin.1  | 51.80 | Clostridiales       | 169646 | 2230137 |
| Sample_LPB03.mb.60              | 56.70 | Clostridiales       | 13106  | 2470761 |
| Sample_LPB03.Cluster1336        | 55.60 | Bacteria            | 177370 | 2689521 |
| Sample_LPB03.mb.28              | 40.80 | Clostridiales       | 29770  | 2002164 |
| Sample_LPB03.Cluster466         | 60.40 | Bifidobacteriaceae  | 137551 | 1921717 |
| Sample_LPB03.mb.46              | 47.90 | Clostridiales       | 16811  | 1673532 |
| Sample_LPB03.mb.75              | 58.70 | Clostridiales       | 17845  | 1607493 |
| Sample_LPB03.mb.83              | 62.20 | Clostridiales       | 6876   | 1460615 |
| Sample_LPB03.Cluster375         | 58.40 | Bacteroidetes       | 101082 | 2574556 |
| Sample_LPB03.mb.82cbin.1        | 60.80 | Clostridiales       | 13898  | 2100794 |
| Sample_LPB03.Cluster632         | 58.60 | Bifidobacteriaceae  | 224860 | 2502552 |
| Sample_LPB03.mb.93              | 62.20 | Actinobacteria      | 103701 | 2159130 |
| Sample_LPB03.mb.40              | 43.30 | Clostridiales       | 11498  | 2585384 |
| Sample_LPB03.mb.31              | 28.50 | Clostridiales       | 58038  | 2945165 |
| Sample_LPB03.mb.55cbin.1        | 38.70 | Clostridiales       | 78312  | 2171925 |
| Sample_LPB03.mb.86              | 42.60 | Clostridiales       | 12873  | 3105003 |
| Sample_LPB03.mb.78              | 56.90 | Bacteroidetes       | 334938 | 2361632 |
| Sample_LPB03.mb.50              | 46.10 | Bacteroidales       | 79731  | 2976634 |
| Sample_LPB03.mb.45cbin.1        | 62.00 | Deltaproteobacteria | 12284  | 3101838 |
| Sample_LPB03.mb.47              | 46.40 | Bacteroidales       | 80512  | 4385315 |
| Sample_LPB03.Cluster4744cbin.1  | 50.60 | Enterobacteriaceae  | 30818  | 4539006 |
| Sample_LPB04.Cluster13416cbin.1 | 25.90 | Bacteria            | 21940  | 1329976 |
| Sample_LPB04.Cluster2924cbin.1  | 48.30 | Clostridia          | 12156  | 1821501 |
| Sample_LPB04.mb.12              | 50.30 | Clostridiales       | 131334 | 2226051 |
| Sample_LPB04.Cluster395         | 60.80 | Clostridiales       | 44206  | 1596034 |
| Sample_LPB04.mb.54              | 55.50 | Clostridia          | 8000   | 2118392 |
| Sample_LPB04.mb.25              | 49.00 | Bacteria            | 93283  | 1983051 |

|                                 |       |                     |        |         |
|---------------------------------|-------|---------------------|--------|---------|
| Sample_LPB04.mb.41              | 47.20 | Clostridiales       | 96371  | 2092913 |
| Sample_LPB04.Cluster591cbin.1   | 58.30 | Bacteria            | 7274   | 2069239 |
| Sample_LPB04.Cluster636         | 59.20 | Clostridiales       | 61302  | 2148831 |
| Sample_LPB04.mb.60              | 53.50 | Clostridia          | 55400  | 1738267 |
| Sample_LPB04.mb.49              | 57.40 | Clostridiales       | 24414  | 1801143 |
| Sample_LPB04.mb.27              | 61.90 | Clostridiales       | 155666 | 1863672 |
| Sample_LPB04.Cluster6113        | 49.80 | Clostridiales       | 144604 | 2311880 |
| Sample_LPB04.mb.36cbin.1        | 48.50 | Clostridiales       | 11819  | 2718357 |
| Sample_LPB04.mb.56cbin.1        | 59.80 | Clostridiales       | 104028 | 2304411 |
| Sample_LPB04.Cluster4480        | 54.00 | Clostridiales       | 280090 | 1713568 |
| Sample_LPB04.Cluster8893        | 46.10 | Bacteroidetes       | 243367 | 2390750 |
| Sample_LPB04.Cluster4cbin.1     | 59.10 | Clostridiales       | 6284   | 2600074 |
| Sample_LPB04.mb.32cbin.1        | 41.10 | Clostridiales       | 167972 | 1943464 |
| Sample_LPB04.Cluster13352       | 31.00 | Euryarchaeota       | 111896 | 1791139 |
| Sample_LPB04.Cluster2894cbin.1  | 56.70 | Bifidobacteriaceae  | 10094  | 1856455 |
| Sample_LPB04.Cluster24          | 63.60 | Deltaproteobacteria | 32031  | 2544565 |
| Sample_LPB04.Cluster12970cbin.1 | 36.10 | Clostridiales       | 28759  | 2449644 |
| Sample_LPB04.Cluster2445        | 55.80 | Bacteria            | 143811 | 3045963 |
| Sample_LPB04.mb.47              | 59.90 | Clostridiales       | 5541   | 1990245 |
| Sample_LPB04.mb.76cbin.1        | 58.10 | Clostridiales       | 48359  | 3004329 |
| Sample_LPB04.mb.33              | 59.90 | Bacteroidetes       | 30823  | 3082185 |
| Sample_LPB04.mb.6cbin.1         | 56.70 | Clostridiales       | 69057  | 1876378 |
| Sample_LPB04.mb.53              | 59.80 | Bacteroidetes       | 102517 | 2642070 |
| Sample_LPB04.mb.61              | 48.30 | Proteobacteria      | 23562  | 1702949 |
| Sample_LPB04.Cluster10566       | 43.40 | Bacteroidales       | 320281 | 3117883 |
| Sample_LPB04.mb.29cbin.1        | 41.90 | Lachnospiraceae     | 23880  | 2349458 |
| Sample_LPB04.mb.67              | 43.40 | Selenomonadales     | 23236  | 2141453 |
| Sample_LPB04.Cluster7411cbin.1  | 43.10 | Bacteria            | 5537   | 3298152 |
| Sample_LPB04.mb.68              | 46.90 | Lachnospiraceae     | 30862  | 3112220 |
| Sample_LPB04.mb.69cbin.1        | 57.80 | Clostridiales       | 90197  | 2429695 |
| Sample_LPB04.mb.88              | 54.70 | Clostridiales       | 7111   | 2478779 |
| Sample_LPB04.mb.73              | 45.90 | Clostridiales       | 11437  | 2241358 |
| Sample_LPB04.Cluster7566        | 44.80 | Bacteroidales       | 39992  | 3672806 |
| Sample_LPB04.mb.90              | 58.60 | Bacteroidetes       | 244471 | 2480442 |
| Sample_LPB04.mb.64              | 58.90 | Bacteroidetes       | 156777 | 3091334 |
| Sample_LPB04.mb.18cbin.1        | 45.10 | Bacteroidales       | 31935  | 4506684 |
| Sample_LPB04.mb.51cbin.1        | 41.80 | Bacteroidales       | 84555  | 3900788 |
| Sample_LPB04.mb.9cbin.1         | 44.10 | Clostridiales       | 167913 | 2752062 |
| Sample_LPB04.mb.91cbin.1        | 37.10 | Clostridiales       | 140942 | 2876587 |
| Sample_LPB04.mb.7               | 41.30 | Lachnospiraceae     | 32183  | 3910171 |
| Sample_LPB04.mb.100cbin.1       | 41.50 | Bacteroides         | 46635  | 5504692 |
| Sample_LPB05.Cluster2433cbin.1  | 51.70 | Bacteria            | 8080   | 1611574 |
| Sample_LPB05.Cluster13939       | 28.40 | Bacteria            | 184930 | 1673723 |
| Sample_LPB05.Cluster4858        | 49.40 | Clostridiales       | 97842  | 1887422 |
| Sample_LPB05.Cluster4851cbin.1  | 48.10 | Clostridiales       | 12084  | 1887940 |
| Sample_LPB05.mb.12cbin.1        | 26.00 | Bacteria            | 216521 | 1272105 |
| Sample_LPB05.mb.112             | 53.60 | Clostridia          | 35739  | 1728126 |
| Sample_LPB05.Cluster7796cbin.1  | 48.60 | Clostridiales       | 14898  | 2730401 |
| Sample_LPB05.Cluster6861        | 48.60 | Bacteria            | 309211 | 2226192 |
| Sample_LPB05.Cluster12286cbin.1 | 39.80 | Clostridiales       | 30077  | 3099658 |
| Sample_LPB05.mb.3               | 56.00 | Bacteria            | 33055  | 1934074 |
| Sample_LPB05.mb.54cbin.1        | 48.10 | Clostridia          | 24170  | 1901555 |
| Sample_LPB05.mb.47              | 52.40 | Clostridiales       | 43244  | 2140419 |
| Sample_LPB05.Cluster11235       | 40.80 | Clostridiales       | 140320 | 2112585 |
| Sample_LPB05.mb.50              | 62.70 | Clostridia          | 13267  | 2732861 |
| Sample_LPB05.Cluster7261        | 43.40 | Selenomonadales     | 141683 | 2363134 |
| Sample_LPB05.mb.109cbin.1       | 61.80 | Clostridiales       | 15984  | 2641611 |
| Sample_LPB05.mb.16cbin.1        | 59.80 | Clostridiales       | 116134 | 2488103 |

|                                 |       |                     |        |         |
|---------------------------------|-------|---------------------|--------|---------|
| Sample_LPB05.Cluster3159        | 54.60 | Bacteroidetes       | 202443 | 2871580 |
| Sample_LPB05.mb.100             | 48.20 | Clostridiales       | 18532  | 1707969 |
| Sample_LPB05.mb.66              | 27.20 | Bacteria            | 73915  | 1312827 |
| Sample_LPB05.mb.37cbin.1        | 61.90 | Clostridiales       | 19553  | 1715007 |
| Sample_LPB05.mb.17              | 40.90 | Clostridiales       | 56610  | 3370528 |
| Sample_LPB05.Cluster3708cbin.1  | 53.20 | Clostridiales       | 205757 | 2327367 |
| Sample_LPB05.Cluster9022        | 44.50 | Clostridiales       | 119142 | 1946581 |
| Sample_LPB05.Cluster10054       | 43.90 | Clostridiales       | 195621 | 2885436 |
| Sample_LPB05.Cluster4298cbin.1  | 55.40 | Bacteria            | 127223 | 2941868 |
| Sample_LPB05.mb.117             | 56.10 | Clostridiales       | 56957  | 2456228 |
| Sample_LPB05.mb.119             | 46.10 | Clostridiales       | 49258  | 2372012 |
| Sample_LPB05.Cluster5602        | 46.90 | Lachnospiraceae     | 135744 | 7039417 |
| Sample_LPB05.mb.29cbin.1        | 43.70 | Lachnospiraceae     | 101148 | 3362319 |
| Sample_LPB05.Cluster11890cbin.1 | 38.40 | Bacteroidales       | 28718  | 3461885 |
| Sample_LPB05.mb.69              | 57.00 | Clostridiales       | 76757  | 1760191 |
| Sample_LPB05.mb.62              | 58.30 | Bacteroidetes       | 83279  | 2389378 |
| Sample_LPB05.mb.26              | 59.50 | Clostridiales       | 78720  | 3317226 |
| Sample_LPB05.mb.96cbin.1        | 47.00 | Clostridiales       | 80107  | 2051555 |
| Sample_LPB05.mb.71              | 57.00 | Clostridiales       | 92204  | 2028880 |
| Sample_LPB05.mb.65              | 60.20 | Actinobacteria      | 22587  | 2000534 |
| Sample_LPB05.mb.7               | 59.50 | Clostridiales       | 8650   | 2240845 |
| Sample_LPB05.mb.82              | 59.80 | Clostridiales       | 78100  | 2758924 |
| Sample_LPB05.mb.84              | 60.20 | Bacteroidetes       | 38972  | 2198983 |
| Sample_LPB05.Cluster6812cbin.1  | 43.30 | Bacteroidales       | 133894 | 5193983 |
| Sample_LPB05.mb.75              | 37.20 | Clostridiales       | 85301  | 2722213 |
| Sample_LPB05.mb.93cbin.1        | 60.10 | Bifidobacteriaceae  | 35434  | 2597161 |
| Sample_LPB05.mb.94              | 58.80 | Deltaproteobacteria | 19589  | 2837737 |
| Sample_LPB05.mb.64cbin.1        | 45.00 | Bacteroidales       | 15194  | 4409073 |
| Sample_LPB05.mb.95              | 47.50 | Bacteroidales       | 20625  | 3747194 |
| Sample_LPB05.mb.48cbin.1        | 50.70 | Enterobacteriaceae  | 92108  | 4605195 |
| Sample_LPB08.Cluster5246cbin.1  | 43.00 | Clostridiales       | 77340  | 2889446 |
| Sample_LPB08.mb.71              | 27.00 | Bacteria            | 130680 | 1446091 |
| Sample_LPB08.Cluster4938        | 37.40 | Clostridiales       | 41853  | 3546580 |
| Sample_LPB08.mb.16              | 36.00 | Clostridiales       | 132194 | 2791785 |
| Sample_LPB08.mb.20              | 61.60 | Clostridiales       | 17630  | 2003260 |
| Sample_LPB08.mb.57              | 61.90 | Clostridiales       | 109944 | 1945895 |
| Sample_LPB08.Cluster730         | 54.90 | Bacteroidetes       | 173095 | 1958317 |
| Sample_LPB08.mb.49              | 49.00 | Clostridiales       | 8275   | 2366805 |
| Sample_LPB08.Cluster4192        | 40.20 | Clostridiales       | 203025 | 1778621 |
| Sample_LPB08.mb.28cbin.1        | 54.00 | Clostridiales       | 28691  | 1785531 |
| Sample_LPB08.Cluster14cbin.1    | 60.00 | Clostridiales       | 58976  | 2464120 |
| Sample_LPB08.mb.33              | 46.50 | Lachnospiraceae     | 70791  | 2942927 |
| Sample_LPB08.mb.67              | 56.40 | Clostridiales       | 36750  | 2887877 |
| Sample_LPB08.mb.13cbin.1        | 43.40 | Selenomonadales     | 147433 | 2408502 |
| Sample_LPB08.mb.9cbin.1         | 60.00 | Clostridiales       | 106360 | 1987138 |
| Sample_LPB08.mb.12              | 54.60 | Selenomonadales     | 35609  | 2084988 |
| Sample_LPB08.mb.3               | 59.50 | Bacteroidetes       | 133533 | 2703834 |
| Sample_LPB08.mb.10cbin.1        | 45.30 | Clostridiales       | 32089  | 2462954 |
| Sample_LPB08.Cluster93          | 56.60 | Bifidobacteriaceae  | 144920 | 2170002 |
| Sample_LPB08.Cluster6413cbin.1  | 36.90 | Clostridiales       | 9750   | 2787275 |
| Sample_LPB08.mb.41cbin.1        | 50.30 | Bacteroidales       | 65418  | 2252881 |
| Sample_LPB08.Cluster4247        | 41.10 | Lachnospiraceae     | 87170  | 3021040 |
| Sample_LPB08.mb.6               | 60.10 | Deltaproteobacteria | 7831   | 3464686 |
| Sample_LPB08.mb.25              | 43.40 | Bacteroidales       | 68164  | 3147337 |
| Sample_LPB08.Cluster4577cbin.1  | 41.40 | Lachnospiraceae     | 61570  | 2757817 |
| Sample_LPB08.mb.15cbin.1        | 48.20 | Proteobacteria      | 60017  | 2778187 |
| Sample_LPB08.mb.36cbin.1        | 43.10 | Bacteria            | 21249  | 3877064 |
| Sample_LPB08.Cluster3074cbin.1  | 46.40 | Bacteroidales       | 134106 | 4263653 |

|                                 |       |                    |        |         |
|---------------------------------|-------|--------------------|--------|---------|
| Sample_LPB08.mb.60cbin.1        | 45.20 | Bacteroidales      | 136777 | 4269106 |
| Sample_LPB08.mb.8               | 43.40 | Bacteroidales      | 154995 | 4359428 |
| Sample_LPC01.Cluster3588        | 46.50 | Clostridiales      | 91864  | 1865526 |
| Sample_LPC01.Cluster12          | 62.20 | Clostridiales      | 13509  | 2018496 |
| Sample_LPC01.mb.111             | 33.20 | Clostridiales      | 103446 | 2242505 |
| Sample_LPC01.Cluster2751        | 48.20 | Clostridiales      | 105234 | 2879660 |
| Sample_LPC01.mb.112             | 36.30 | Clostridiales      | 121113 | 2352134 |
| Sample_LPC01.mb.119             | 36.60 | Clostridiales      | 43180  | 3033591 |
| Sample_LPC01.mb.116             | 62.30 | Clostridiales      | 10153  | 1719645 |
| Sample_LPC01.Cluster1033cbin.1  | 54.90 | Bacteroidetes      | 116622 | 1957388 |
| Sample_LPC01.mb.68              | 60.80 | Bacteria           | 36920  | 2131197 |
| Sample_LPC01.mb.30cbin.1        | 58.40 | Clostridiales      | 9074   | 2622509 |
| Sample_LPC01.mb.2cbin.1         | 38.50 | Clostridiales      | 96411  | 2486992 |
| Sample_LPC01.Cluster396cbin.1   | 59.60 | Clostridiales      | 16217  | 2212442 |
| Sample_LPC01.Cluster1744        | 51.00 | Clostridiales      | 125334 | 2294923 |
| Sample_LPC01.mb.109cbin.1       | 48.40 | Firmicutes         | 35224  | 1805613 |
| Sample_LPC01.Cluster11550cbin.1 | 37.50 | Clostridiales      | 19655  | 2468875 |
| Sample_LPC01.Cluster5424        | 43.00 | Clostridiales      | 146736 | 2458363 |
| Sample_LPC01.mb.28cbin.1        | 40.70 | Clostridiales      | 58192  | 3766307 |
| Sample_LPC01.mb.124cbin.1       | 56.40 | Clostridiales      | 13518  | 2392010 |
| Sample_LPC01.Cluster6136        | 41.30 | Lachnospiraceae    | 66181  | 2768218 |
| Sample_LPC01.mb.105cbin.1       | 43.40 | Lachnospiraceae    | 129470 | 2721360 |
| Sample_LPC01.mb.90              | 46.10 | Clostridiales      | 81988  | 2623352 |
| Sample_LPC01.Cluster10977cbin.1 | 31.30 | Firmicutes         | 31189  | 2311906 |
| Sample_LPC01.mb.118             | 35.90 | Clostridiales      | 132079 | 2502654 |
| Sample_LPC01.mb.96              | 41.00 | Clostridiales      | 75155  | 2708005 |
| Sample_LPC01.mb.110cbin.1       | 49.30 | Proteobacteria     | 13146  | 2054116 |
| Sample_LPC01.mb.61              | 48.90 | Clostridiales      | 27311  | 2760457 |
| Sample_LPC01.mb.45              | 44.60 | Clostridiales      | 118121 | 2426041 |
| Sample_LPC01.mb.41              | 28.70 | Clostridiales      | 67469  | 2600389 |
| Sample_LPC01.mb.76cbin.1        | 29.90 | Bacteria           | 12113  | 2335934 |
| Sample_LPC01.mb.89cbin.1        | 33.70 | Clostridiales      | 50652  | 2060372 |
| Sample_LPC01.mb.91              | 46.80 | Lachnospiraceae    | 31294  | 3149126 |
| Sample_LPC01.mb.128cbin.1       | 44.00 | Bacteroidales      | 63155  | 3697040 |
| Sample_LPC01.mb.67cbin.1        | 43.20 | Bacteroidales      | 8254   | 2637959 |
| Sample_LPC01.mb.34cbin.1        | 48.80 | Bacteroidales      | 54883  | 3327236 |
| Sample_LPC01.mb.27cbin.1        | 45.10 | Bacteroidales      | 69927  | 4131436 |
| Sample_LPC02.Cluster15787       | 26.00 | Bacteria           | 55967  | 1204271 |
| Sample_LPC02.Cluster15690       | 28.50 | Bacteria           | 469394 | 1664354 |
| Sample_LPC02.Cluster14689       | 36.50 | Clostridiales      | 208149 | 1779574 |
| Sample_LPC02.Cluster9279cbin.1  | 43.60 | Clostridiales      | 39485  | 2798499 |
| Sample_LPC02.Cluster130cbin.1   | 59.00 | Clostridiales      | 47346  | 2189756 |
| Sample_LPC02.mb.123             | 49.40 | Clostridiales      | 74762  | 1866814 |
| Sample_LPC02.Cluster3115        | 51.90 | Clostridiales      | 136971 | 2106991 |
| Sample_LPC02.Cluster3628        | 53.90 | Clostridiales      | 231882 | 1793178 |
| Sample_LPC02.Cluster8220cbin.1  | 46.50 | Clostridiales      | 84242  | 1716444 |
| Sample_LPC02.mb.24              | 59.80 | Clostridia         | 38419  | 2470373 |
| Sample_LPC02.Cluster3411cbin.1  | 55.50 | Bacteroidetes      | 14714  | 2539433 |
| Sample_LPC02.Cluster4862        | 51.30 | Clostridiales      | 160000 | 2149710 |
| Sample_LPC02.Cluster12100       | 41.80 | Clostridiales      | 161110 | 2426220 |
| Sample_LPC02.Cluster2482        | 55.50 | Bacteria           | 206762 | 2786344 |
| Sample_LPC02.mb.52              | 26.70 | Bacteria           | 68153  | 1170883 |
| Sample_LPC02.Cluster596cbin.1   | 60.10 | Bifidobacteriaceae | 13944  | 2016131 |
| Sample_LPC02.mb.122             | 41.00 | Lachnospiraceae    | 88066  | 2588338 |
| Sample_LPC02.mb.23              | 53.30 | Clostridiales      | 47144  | 1967808 |
| Sample_LPC02.Cluster9367cbin.1  | 44.60 | Clostridiales      | 131968 | 2241202 |
| Sample_LPC02.mb.17              | 56.90 | Clostridiales      | 58979  | 2185085 |
| Sample_LPC02.mb.47              | 58.70 | Clostridiales      | 11212  | 2563510 |

|                                 |       |                     |        |         |
|---------------------------------|-------|---------------------|--------|---------|
| Sample_LPC02.mb.21              | 59.50 | Clostridiales       | 12724  | 2128521 |
| Sample_LPC02.mb.12              | 58.10 | Bacteroidetes       | 405279 | 2628208 |
| Sample_LPC02.mb.125             | 54.90 | Bacteroidetes       | 105497 | 2107243 |
| Sample_LPC02.mb.109             | 44.50 | Clostridiales       | 59999  | 2580952 |
| Sample_LPC02.mb.15              | 38.90 | Clostridiales       | 74987  | 1758713 |
| Sample_LPC02.mb.76              | 48.10 | Clostridiales       | 8902   | 1756585 |
| Sample_LPC02.mb.70cbin.1        | 45.20 | Clostridiales       | 129559 | 1992037 |
| Sample_LPC02.mb.60              | 56.90 | Clostridiales       | 17854  | 2283408 |
| Sample_LPC02.Cluster5884        | 46.20 | Bacteroidales       | 58673  | 3177351 |
| Sample_LPC02.mb.69cbin.1        | 48.70 | Clostridiales       | 32470  | 2585714 |
| Sample_LPC02.mb.127             | 42.10 | Lachnospiraceae     | 10689  | 2197620 |
| Sample_LPC02.mb.80cbin.1        | 56.10 | Clostridiales       | 33559  | 2403694 |
| Sample_LPC02.mb.7cbin.1         | 59.40 | Clostridiales       | 17016  | 1896763 |
| Sample_LPC02.mb.58              | 59.50 | Clostridiales       | 32561  | 2274890 |
| Sample_LPC02.Cluster8316        | 45.40 | Bacteroidales       | 131161 | 3963386 |
| Sample_LPC02.mb.87              | 59.50 | Bacteroidetes       | 138188 | 2882102 |
| Sample_LPC02.mb.90cbin.1        | 59.50 | Bacteroidetes       | 95685  | 2855469 |
| Sample_LPC02.mb.51              | 43.30 | Bacteria            | 42498  | 3858901 |
| Sample_LPC02.mb.79              | 42.00 | Bacteroidales       | 57925  | 4949969 |
| Sample_LPC02.mb.99              | 45.00 | Bacteroidales       | 147779 | 4688929 |
| Sample_LPC03.Cluster13638       | 36.50 | Clostridiales       | 249695 | 1765818 |
| Sample_LPC03.Cluster353cbin.1   | 58.20 | Clostridiales       | 50640  | 2793093 |
| Sample_LPC03.Cluster11360cbin.1 | 41.50 | Clostridiales       | 268502 | 2556661 |
| Sample_LPC03.mb.122             | 30.60 | Bacteria            | 50159  | 1677790 |
| Sample_LPC03.Cluster8563        | 46.10 | Clostridiales       | 168841 | 1697679 |
| Sample_LPC03.Cluster8725        | 45.20 | Clostridiales       | 120321 | 1670357 |
| Sample_LPC03.Cluster12660cbin.1 | 38.20 | Clostridiales       | 43769  | 3224200 |
| Sample_LPC03.Cluster211cbin.1   | 60.70 | Clostridiales       | 22907  | 1821209 |
| Sample_LPC03.Cluster213cbin.1   | 60.50 | Clostridiales       | 27023  | 1724599 |
| Sample_LPC03.Cluster1592cbin.1  | 59.20 | Clostridiales       | 19326  | 1922065 |
| Sample_LPC03.Cluster1220cbin.1  | 56.00 | Clostridiales       | 40526  | 2380193 |
| Sample_LPC03.mb.128cbin.1       | 59.40 | Clostridiales       | 123000 | 2132574 |
| Sample_LPC03.mb.3               | 50.90 | Bacteria            | 69521  | 1913878 |
| Sample_LPC03.mb.35              | 29.30 | Bacteria            | 76537  | 1576098 |
| Sample_LPC03.Cluster9996cbin.1  | 41.50 | Lachnospiraceae     | 6237   | 2837607 |
| Sample_LPC03.mb.29cbin.1        | 52.50 | Clostridiales       | 17275  | 2254167 |
| Sample_LPC03.Cluster5010cbin.1  | 56.90 | Bacteroidetes       | 268193 | 2578641 |
| Sample_LPC03.Cluster2175        | 55.60 | Bacteria            | 219767 | 2687061 |
| Sample_LPC03.mb.94              | 58.50 | Bacteria            | 15361  | 1521673 |
| Sample_LPC03.Cluster1576cbin.1  | 52.90 | Bacteroidales       | 69771  | 2383028 |
| Sample_LPC03.mb.33cbin.1        | 57.40 | Clostridiales       | 14201  | 1714474 |
| Sample_LPC03.mb.19              | 60.20 | Actinobacteria      | 17710  | 2065793 |
| Sample_LPC03.mb.124             | 53.70 | Clostridiales       | 280357 | 1905784 |
| Sample_LPC03.mb.111cbin.1       | 39.30 | Clostridiales       | 76937  | 2074530 |
| Sample_LPC03.Cluster11cbin.1    | 62.20 | Deltaproteobacteria | 7470   | 2839403 |
| Sample_LPC03.mb.40              | 50.80 | Clostridiales       | 19602  | 2003714 |
| Sample_LPC03.Cluster653         | 58.50 | Bifidobacteriaceae  | 235399 | 2339744 |
| Sample_LPC03.mb.108             | 59.60 | Bacteroidetes       | 79318  | 2789054 |
| Sample_LPC03.mb.51cbin.1        | 61.10 | Clostridiales       | 24432  | 1963355 |
| Sample_LPC03.Cluster4989cbin.1  | 51.20 | Prevotella          | 118556 | 3165168 |
| Sample_LPC03.mb.56              | 57.50 | Clostridiales       | 6974   | 2187211 |
| Sample_LPC03.mb.126             | 42.90 | Clostridiales       | 251881 | 3013259 |
| Sample_LPC03.mb.117cbin.1       | 53.80 | Bacteroidales       | 106409 | 2499121 |
| Sample_LPC03.mb.50cbin.1        | 53.80 | Clostridiales       | 53782  | 2724723 |
| Sample_LPC03.mb.28              | 43.50 | Lachnospiraceae     | 98410  | 2639414 |
| Sample_LPC03.mb.24cbin.1        | 46.40 | Bacteroidales       | 85554  | 2692642 |
| Sample_LPC03.mb.9cbin.1         | 48.70 | Clostridiales       | 74330  | 2607915 |
| Sample_LPC03.mb.71              | 54.70 | Bacteroidetes       | 91933  | 2166226 |

|                                 |       |                     |        |         |
|---------------------------------|-------|---------------------|--------|---------|
| Sample_LPC03.mb.90cbin.1        | 46.60 | Lachnospiraceae     | 17705  | 2380566 |
| Sample_LPC03.mb.86cbin.1        | 49.20 | Bacteroidales       | 77724  | 2748000 |
| Sample_LPC03.mb.11              | 47.10 | Bacteroidales       | 30659  | 3749363 |
| Sample_LPC03.mb.77              | 44.20 | Bacteroidales       | 72053  | 3613345 |
| Sample_LPC04.Cluster12914       | 28.50 | Bacteria            | 12471  | 1339672 |
| Sample_LPC04.Cluster148         | 62.50 | Clostridia          | 142253 | 1958621 |
| Sample_LPC04.Cluster8345        | 46.60 | Clostridiales       | 388913 | 1550073 |
| Sample_LPC04.Cluster6011cbin.1  | 49.70 | Clostridiales       | 105009 | 2017835 |
| Sample_LPC04.mb.111             | 63.50 | Clostridia          | 61468  | 2214337 |
| Sample_LPC04.mb.26              | 52.80 | Clostridiales       | 9776   | 1810323 |
| Sample_LPC04.mb.12              | 47.20 | Clostridiales       | 96363  | 1889792 |
| Sample_LPC04.mb.101cbin.1       | 47.90 | Bacteria            | 25324  | 2204451 |
| Sample_LPC04.mb.106             | 56.80 | Clostridia          | 106553 | 3865528 |
| Sample_LPC04.mb.30              | 59.20 | Clostridia          | 11946  | 3192611 |
| Sample_LPC04.mb.104             | 60.50 | Clostridiales       | 14655  | 1885127 |
| Sample_LPC04.Cluster1226cbin.1  | 57.30 | Clostridiales       | 40687  | 2130079 |
| Sample_LPC04.mb.57              | 26.40 | Bacteria            | 70401  | 1317807 |
| Sample_LPC04.mb.67              | 24.30 | Bacteria            | 87056  | 1074055 |
| Sample_LPC04.Cluster6453        | 43.90 | Selenomonadales     | 47682  | 2007454 |
| Sample_LPC04.mb.70              | 27.80 | Bacteria            | 54413  | 1108397 |
| Sample_LPC04.mb.22              | 60.00 | Actinobacteria      | 74853  | 2081531 |
| Sample_LPC04.mb.51cbin.1        | 42.30 | Clostridiales       | 98777  | 2688142 |
| Sample_LPC04.Cluster1402cbin.1  | 58.50 | Bacteria            | 137420 | 2727673 |
| Sample_LPC04.Cluster10775       | 41.00 | Clostridiales       | 143148 | 1943651 |
| Sample_LPC04.mb.47              | 59.30 | Clostridiales       | 9849   | 2140369 |
| Sample_LPC04.Cluster12998       | 31.00 | Euryarchaeota       | 129944 | 1788453 |
| Sample_LPC04.mb.55              | 49.10 | Bacteria            | 54248  | 1936916 |
| Sample_LPC04.mb.43cbin.1        | 62.30 | Clostridiales       | 51010  | 2649566 |
| Sample_LPC04.Cluster10936cbin.1 | 41.30 | Clostridiales       | 214549 | 2599204 |
| Sample_LPC04.Cluster554cbin.1   | 63.80 | Deltaproteobacteria | 14734  | 2545423 |
| Sample_LPC04.mb.6               | 36.50 | Clostridiales       | 21568  | 2387696 |
| Sample_LPC04.mb.5               | 45.00 | Clostridiales       | 16419  | 2451777 |
| Sample_LPC04.Cluster2788        | 55.80 | Bacteria            | 141886 | 3045756 |
| Sample_LPC04.mb.65cbin.1        | 53.00 | Clostridiales       | 34165  | 2401899 |
| Sample_LPC04.mb.20              | 40.80 | Clostridiales       | 15163  | 2431694 |
| Sample_LPC04.mb.58              | 53.50 | Clostridiales       | 63392  | 1922755 |
| Sample_LPC04.mb.85              | 53.50 | Clostridia          | 65817  | 1808529 |
| Sample_LPC04.mb.32              | 58.40 | Clostridiales       | 105606 | 2762812 |
| Sample_LPC04.mb.89              | 53.30 | Clostridia          | 50455  | 1856082 |
| Sample_LPC04.mb.40              | 35.90 | Clostridiales       | 11286  | 2286431 |
| Sample_LPC04.mb.19cbin.1        | 37.10 | Clostridiales       | 141239 | 2808388 |
| Sample_LPC04.mb.99              | 59.40 | Clostridia          | 12753  | 2142352 |
| Sample_LPC04.mb.90              | 61.30 | Clostridia          | 58839  | 2640543 |
| Sample_LPC04.Cluster1843cbin.1  | 58.70 | Bacteroidetes       | 158506 | 3101095 |
| Sample_LPC04.mb.74              | 41.10 | Bacteria            | 27874  | 2538102 |
| Sample_LPC04.mb.8               | 61.10 | Clostridiales       | 12958  | 1451444 |
| Sample_LPC04.Cluster6674cbin.1  | 43.30 | Bacteria            | 10303  | 3683228 |
| Sample_LPC04.mb.95              | 37.70 | Clostridiales       | 162211 | 2215743 |
| Sample_LPC04.Cluster9196        | 43.40 | Bacteroidales       | 156128 | 3105997 |
| Sample_LPC04.mb.91cbin.1        | 59.60 | Clostridiales       | 75485  | 2522894 |
| Sample_LPC04.mb.105             | 45.60 | Bacteroidales       | 16391  | 3767371 |
| Sample_LPC04.mb.80cbin.1        | 36.60 | Clostridiales       | 157351 | 2175220 |
| Sample_LPC04.mb.87              | 59.80 | Bacteroidetes       | 74714  | 2719790 |
| Sample_LPC04.mb.28cbin.1        | 44.90 | Bacteroidales       | 35915  | 4250869 |
| Sample_LPC04.mb.69              | 43.10 | Lachnospiraceae     | 59328  | 2944414 |
| Sample_LPC04.mb.54              | 42.20 | Bacteroides         | 54479  | 4741183 |
| Sample_LPC05.Cluster7047        | 47.90 | Clostridiales       | 121675 | 1996937 |
| Sample_LPC05.mb.119cbin.1       | 62.10 | Clostridiales       | 11886  | 1633152 |

|                                 |       |                     |        |         |
|---------------------------------|-------|---------------------|--------|---------|
| Sample_LPC05.mb.14cbin.1        | 34.20 | Clostridiales       | 110029 | 2682933 |
| Sample_LPC05.Cluster11595cbin.1 | 45.10 | Lachnospiraceae     | 129368 | 2411287 |
| Sample_LPC05.Cluster12425       | 39.90 | Clostridiales       | 84174  | 2008240 |
| Sample_LPC05.Cluster11892cbin.1 | 43.30 | Selenomonadales     | 279830 | 2448052 |
| Sample_LPC05.mb.16cbin.1        | 43.60 | Clostridiales       | 75146  | 2994676 |
| Sample_LPC05.Cluster10737       | 42.90 | Clostridiales       | 172424 | 2564362 |
| Sample_LPC05.Cluster8509        | 44.40 | Clostridiales       | 119490 | 1908004 |
| Sample_LPC05.Cluster141cbin.1   | 56.90 | Bifidobacteriaceae  | 26313  | 2057099 |
| Sample_LPC05.mb.69cbin.1        | 50.50 | Bacteria            | 60352  | 2032967 |
| Sample_LPC05.mb.102             | 54.90 | Bacteroidetes       | 71830  | 2005011 |
| Sample_LPC05.Cluster9730        | 43.40 | Lachnospiraceae     | 38703  | 1925337 |
| Sample_LPC05.mb.100             | 36.60 | Clostridiales       | 160203 | 2037844 |
| Sample_LPC05.Cluster12574cbin.1 | 40.50 | Clostridiales       | 164386 | 2770295 |
| Sample_LPC05.Cluster9183        | 43.70 | Clostridiales       | 171888 | 2276256 |
| Sample_LPC05.mb.113cbin.1       | 60.00 | Bacteroidetes       | 44871  | 2692171 |
| Sample_LPC05.mb.24              | 56.40 | Clostridiales       | 18506  | 2279983 |
| Sample_LPC05.Cluster12851cbin.1 | 38.40 | Bacteroidales       | 52576  | 3271340 |
| Sample_LPC05.Cluster7412cbin.1  | 45.30 | Clostridiales       | 72109  | 3321657 |
| Sample_LPC05.mb.117             | 37.30 | Clostridiales       | 11363  | 2431294 |
| Sample_LPC05.Cluster13262cbin.1 | 43.00 | Bacteria            | 5933   | 3318207 |
| Sample_LPC05.mb.27cbin.1        | 46.20 | Clostridiales       | 48990  | 2258674 |
| Sample_LPC05.mb.52              | 48.50 | Bacteria            | 9637   | 2276767 |
| Sample_LPC05.mb.2               | 60.10 | Clostridiales       | 15862  | 2874870 |
| Sample_LPC05.Cluster4101cbin.1  | 45.50 | Bacteroidales       | 41200  | 3318434 |
| Sample_LPC05.Cluster726cbin.1   | 55.30 | Proteobacteria      | 30433  | 2796483 |
| Sample_LPC05.mb.76cbin.1        | 56.80 | Clostridiales       | 89972  | 2021457 |
| Sample_LPC05.mb.49              | 47.30 | Lachnospiraceae     | 30795  | 3030655 |
| Sample_LPC05.mb.95cbin.1        | 57.60 | Clostridiales       | 95294  | 2352355 |
| Sample_LPC05.mb.85              | 41.00 | Clostridiales       | 13225  | 3301678 |
| Sample_LPC05.mb.112             | 43.30 | Bacteroidales       | 52990  | 2957174 |
| Sample_LPC05.mb.78              | 58.90 | Clostridiales       | 36611  | 1862129 |
| Sample_LPC05.mb.20              | 41.60 | Lachnospiraceae     | 68227  | 3237038 |
| Sample_LPC05.Cluster10950cbin.1 | 42.10 | Bacteroidales       | 30751  | 4356595 |
| Sample_LPC05.mb.25cbin.1        | 47.90 | Bacteroidales       | 70863  | 3779230 |
| Sample_LPC08.mb.20cbin.1        | 42.10 | Bacteria            | 35799  | 4937448 |
| Sample_LPC08.mb.5               | 27.00 | Bacteria            | 140182 | 1463455 |
| Sample_LPC08.mb.17              | 36.40 | Clostridiales       | 19673  | 2369877 |
| Sample_LPC08.mb.54cbin.1        | 42.90 | Clostridiales       | 104230 | 2847270 |
| Sample_LPC08.mb.13              | 62.00 | Clostridiales       | 144677 | 1924056 |
| Sample_LPC08.mb.55cbin.1        | 37.80 | Clostridiales       | 47548  | 3251847 |
| Sample_LPC08.mb.15              | 60.40 | Clostridiales       | 34313  | 2332145 |
| Sample_LPC08.mb.41cbin.1        | 54.80 | Bacteroidetes       | 172816 | 1971210 |
| Sample_LPC08.mb.10              | 46.30 | Lachnospiraceae     | 68255  | 3187118 |
| Sample_LPC08.Cluster2113cbin.1  | 43.40 | Selenomonadales     | 291829 | 2417134 |
| Sample_LPC08.Cluster5547        | 32.70 | Lactobacillales     | 8024   | 1622014 |
| Sample_LPC08.Cluster147cbin.1   | 54.50 | Selenomonadales     | 14756  | 2097697 |
| Sample_LPC08.Cluster4552cbin.1  | 40.50 | Clostridiales       | 237540 | 2071415 |
| Sample_LPC08.mb.26              | 29.20 | Bacteria            | 34809  | 2460301 |
| Sample_LPC08.Cluster227         | 56.90 | Bifidobacteriaceae  | 198329 | 2114232 |
| Sample_LPC08.mb.31cbin.1        | 59.00 | Bacteroidetes       | 130127 | 2917074 |
| Sample_LPC08.mb.42              | 59.70 | Deltaproteobacteria | 7115   | 3407048 |
| Sample_LPC08.mb.44cbin.1        | 50.30 | Bacteroidales       | 68770  | 2273695 |
| Sample_LPC08.Cluster4945cbin.1  | 40.90 | Lachnospiraceae     | 69974  | 3208459 |
| Sample_LPC08.Cluster5239cbin.1  | 43.00 | Bacteria            | 8018   | 3488129 |
| Sample_LPC08.mb.1cbin.1         | 43.50 | Bacteroidales       | 26103  | 3079525 |
| Sample_LPC08.mb.33cbin.1        | 48.10 | Proteobacteria      | 14417  | 2668888 |
| Sample_LPC08.mb.49              | 41.60 | Lachnospiraceae     | 59403  | 2496096 |
| Sample_LPC08.Cluster2875cbin.1  | 46.50 | Bacteroidales       | 152237 | 4173609 |

|                                 |       |                     |        |         |
|---------------------------------|-------|---------------------|--------|---------|
| Sample_LPC08.Cluster1848cbin.1  | 45.30 | Bacteroidales       | 133555 | 4238796 |
| Sample_SCA55.Cluster12046       | 29.60 | Bacteria            | 16761  | 1231757 |
| Sample_SCA55.mb.104cbin.1       | 47.20 | Clostridia          | 31167  | 1453225 |
| Sample_SCA55.Cluster2874        | 51.70 | Clostridiales       | 94168  | 1944123 |
| Sample_SCA55.Cluster7572cbin.1  | 42.10 | Clostridiales       | 22220  | 2543190 |
| Sample_SCA55.Cluster4326cbin.1  | 46.50 | Clostridiales       | 93141  | 1837155 |
| Sample_SCA55.Cluster3804cbin.1  | 48.90 | Clostridiales       | 16021  | 2607740 |
| Sample_SCA55.Cluster3130cbin.1  | 51.60 | Bacteroidetes       | 110335 | 3340115 |
| Sample_SCA55.Cluster2493        | 53.70 | Clostridiales       | 211704 | 1842578 |
| Sample_SCA55.mb.44              | 27.90 | Euryarchaeota       | 169592 | 1776570 |
| Sample_SCA55.Cluster10485       | 37.70 | Lactobacillales     | 27657  | 1677449 |
| Sample_SCA55.mb.27              | 33.70 | Bacteria            | 8011   | 1770439 |
| Sample_SCA55.mb.23              | 45.10 | Clostridiales       | 90715  | 2460962 |
| Sample_SCA55.Cluster11573cbin.1 | 36.80 | Gammaproteobacteria | 87029  | 2283824 |
| Sample_SCA55.Cluster6699        | 44.60 | Clostridiales       | 90507  | 2201472 |
| Sample_SCA55.Cluster790         | 58.20 | Veillonellaceae     | 330188 | 2485262 |
| Sample_SCA55.Cluster12012       | 36.00 | Clostridiales       | 159492 | 2465552 |
| Sample_SCA55.mb.7cbin.1         | 36.50 | Clostridiales       | 149174 | 1758312 |
| Sample_SCA55.mb.4cbin.1         | 51.40 | Bacteroidales       | 46292  | 2484072 |
| Sample_SCA55.Cluster8267        | 41.70 | Lachnospiraceae     | 70058  | 2811347 |
| Sample_SCA55.mb.52cbin.1        | 59.80 | Actinobacteria      | 51547  | 2120103 |
| Sample_SCA55.mb.97              | 32.10 | Bacteria            | 371778 | 1929365 |
| Sample_SCA55.mb.38              | 44.50 | Lachnospiraceae     | 19984  | 2124603 |
| Sample_SCA55.mb.21cbin.1        | 50.60 | Lachnospiraceae     | 9759   | 2423601 |
| Sample_SCA55.mb.85              | 52.90 | Clostridiales       | 31717  | 2138071 |
| Sample_SCA55.mb.45cbin.1        | 37.20 | Clostridiales       | 129317 | 2707381 |
| Sample_SCA55.mb.60              | 59.80 | Clostridiales       | 28744  | 2003200 |
| Sample_SCA55.mb.87              | 38.70 | Clostridiales       | 69113  | 2065371 |
| Sample_SCA55.mb.110cbin.1       | 42.10 | Lachnospiraceae     | 71526  | 3953623 |
| Sample_SCA55.mb.95              | 58.70 | Clostridiales       | 40506  | 2340306 |
| Sample_SCA55.mb.99cbin.1        | 56.00 | Enterobacteriaceae  | 217734 | 5272826 |
| Sample_SCA58.Cluster16595       | 25.50 | Bacteria            | 8002   | 1018072 |
| Sample_SCA58.Cluster16706cbin.1 | 24.20 | Bacteria            | 70716  | 989478  |
| Sample_SCA58.Cluster1102        | 58.60 | Clostridia          | 76492  | 2355909 |
| Sample_SCA58.Cluster4228cbin.1  | 49.70 | Clostridiales       | 66821  | 2085773 |
| Sample_SCA58.mb.102             | 48.60 | Clostridiales       | 88622  | 1752485 |
| Sample_SCA58.Cluster4693        | 54.20 | Actinobacteria      | 328091 | 1719666 |
| Sample_SCA58.Cluster15781       | 34.20 | Bacilli             | 48882  | 2673778 |
| Sample_SCA58.mb.118cbin.1       | 49.70 | Clostridiales       | 71452  | 1973563 |
| Sample_SCA58.Cluster605         | 59.30 | Clostridiales       | 48003  | 2073175 |
| Sample_SCA58.mb.25cbin.1        | 48.70 | Clostridia          | 372070 | 1521699 |
| Sample_SCA58.Cluster1069cbin.1  | 56.60 | Clostridiales       | 8389   | 2271980 |
| Sample_SCA58.Cluster6503cbin.1  | 47.90 | Clostridiales       | 47294  | 1809777 |
| Sample_SCA58.mb.121             | 62.30 | Clostridiales       | 13339  | 1457741 |
| Sample_SCA58.Cluster13327       | 40.90 | Clostridiales       | 177199 | 1973467 |
| Sample_SCA58.Cluster10143       | 44.60 | Clostridiales       | 146897 | 2132865 |
| Sample_SCA58.Cluster1691        | 55.70 | Bacteria            | 175223 | 2785556 |
| Sample_SCA58.mb.20              | 62.00 | Clostridiales       | 9289   | 1872844 |
| Sample_SCA58.Cluster10382cbin.1 | 44.20 | Clostridiales       | 72323  | 2687952 |
| Sample_SCA58.mb.5               | 53.90 | Clostridia          | 13609  | 1631094 |
| Sample_SCA58.Cluster864         | 57.80 | Proteobacteria      | 23432  | 2121184 |
| Sample_SCA58.mb.129cbin.1       | 57.70 | Clostridiales       | 63327  | 2390901 |
| Sample_SCA58.mb.31cbin.1        | 49.50 | Clostridiales       | 5620   | 1851150 |
| Sample_SCA58.mb.35              | 58.10 | Clostridiales       | 54639  | 3080501 |
| Sample_SCA58.mb.4cbin.1         | 60.00 | Clostridiales       | 103246 | 2063676 |
| Sample_SCA58.mb.107             | 59.90 | Bacteroidetes       | 110989 | 2678183 |
| Sample_SCA58.mb.80              | 26.70 | Bacteria            | 128480 | 1314474 |



|                                 |       |                    |        |         |
|---------------------------------|-------|--------------------|--------|---------|
| Sample_SCA58.mb.43              | 62.40 | Clostridiales      | 26529  | 1437038 |
| Sample_SCA58.mb.15cbin.1        | 60.10 | Bacteroidetes      | 146915 | 2439125 |
| Sample_SCA58.mb.120cbin.1       | 50.90 | Clostridiales      | 157222 | 2418217 |
| Sample_SCA58.mb.46              | 55.00 | Clostridiales      | 11816  | 2478546 |
| Sample_SCA58.Cluster11257       | 43.30 | Bacteroidales      | 158408 | 3104451 |
| Sample_SCA58.mb.103             | 58.90 | Bacteroidetes      | 173389 | 2877663 |
| Sample_SCA58.mb.77              | 60.70 | Actinobacteria     | 47400  | 1818609 |
| Sample_SCA58.mb.27              | 60.90 | Clostridiales      | 16990  | 2198391 |
| Sample_SCA58.mb.63cbin.1        | 60.20 | Clostridiales      | 71061  | 1922006 |
| Sample_SCA58.mb.51              | 64.10 | Actinobacteria     | 5674   | 2012404 |
| Sample_SCA58.Cluster8627cbin.1  | 43.20 | Bacteria           | 20003  | 3936390 |
| Sample_SCA58.mb.123             | 41.90 | Lachnospiraceae    | 21888  | 2258887 |
| Sample_SCA58.mb.55cbin.1        | 59.90 | Actinobacteria     | 26765  | 2305986 |
| Sample_SCA58.Cluster8567        | 45.20 | Bacteroidales      | 143688 | 4078969 |
| Sample_SCA58.Cluster8833        | 45.40 | Bacteroidales      | 110540 | 3987042 |
| Sample_SCA58.mb.91cbin.1        | 61.60 | Clostridiales      | 26169  | 2542084 |
| Sample_SCA58.mb.56cbin.1        | 60.30 | Bifidobacteriaceae | 135928 | 2322483 |
| Sample_SCA58.mb.117cbin.1       | 45.30 | Bacteroidales      | 12479  | 3727943 |
| Sample_SCA58.mb.86              | 54.80 | Bacteroidetes      | 149642 | 2057189 |
| Sample_SCA58.mb.38              | 41.40 | Bacteroidales      | 45271  | 3615902 |
| Sample_SCA58.Cluster8815        | 41.60 | Bacteroidales      | 52066  | 4772262 |
| Sample_SCA58.mb.135             | 56.00 | Enterobacteriaceae | 67703  | 4752581 |
| Sample_SCA59.Cluster5865cbin.1  | 49.30 | Clostridiales      | 72765  | 1801329 |
| Sample_SCA59.Cluster17127       | 27.20 | Euryarchaeota      | 65770  | 1748288 |
| Sample_SCA59.mb.106             | 26.80 | Bacteria           | 87015  | 1121148 |
| Sample_SCA59.mb.124             | 26.50 | Bacteria           | 99599  | 1255816 |
| Sample_SCA59.Cluster179         | 58.50 | Clostridiales      | 121478 | 2390478 |
| Sample_SCA59.Cluster9717        | 44.90 | Actinobacteria     | 216632 | 1530700 |
| Sample_SCA59.Cluster17197cbin.1 | 31.10 | Euryarchaeota      | 218229 | 1735250 |
| Sample_SCA59.Cluster10905       | 42.90 | Clostridiales      | 157632 | 1937266 |
| Sample_SCA59.Cluster12937cbin.1 | 40.50 | Clostridiales      | 253712 | 2171978 |
| Sample_SCA59.Cluster4667cbin.1  | 48.60 | Firmicutes         | 32914  | 1876784 |
| Sample_SCA59.Cluster12108       | 32.60 | Lactobacillales    | 11041  | 1783607 |
| Sample_SCA59.Cluster3650cbin.1  | 51.80 | Clostridiales      | 172626 | 2294004 |
| Sample_SCA59.Cluster3610cbin.1  | 51.00 | Bacteroidales      | 14894  | 2050645 |
| Sample_SCA59.Cluster227         | 58.60 | Bacteria           | 16514  | 2840744 |
| Sample_SCA59.mb.120cbin.1       | 42.00 | Lachnospiraceae    | 12554  | 1895705 |
| Sample_SCA59.mb.133cbin.1       | 57.30 | Clostridiales      | 74964  | 1877178 |
| Sample_SCA59.mb.26              | 59.30 | Actinobacteria     | 64644  | 1697135 |
| Sample_SCA59.mb.15              | 43.80 | Clostridiales      | 65052  | 2779570 |
| Sample_SCA59.Cluster9650cbin.1  | 46.00 | Clostridiales      | 41752  | 2146343 |
| Sample_SCA59.Cluster6328cbin.1  | 45.20 | Prevotella         | 13407  | 3263620 |
| Sample_SCA59.mb.50              | 53.90 | Clostridia         | 16010  | 1706121 |
| Sample_SCA59.mb.102             | 44.40 | Clostridiales      | 39338  | 2557205 |
| Sample_SCA59.mb.24              | 52.20 | Clostridiales      | 13045  | 1787312 |
| Sample_SCA59.mb.30cbin.1        | 37.10 | Clostridiales      | 28101  | 2773123 |
| Sample_SCA59.mb.121             | 43.70 | Lachnospiraceae    | 111204 | 2618473 |
| Sample_SCA59.mb.18              | 58.70 | Bacteroidetes      | 44772  | 2455094 |
| Sample_SCA59.mb.65              | 58.80 | Clostridia         | 44358  | 2845867 |
| Sample_SCA59.mb.117cbin.1       | 58.80 | Bifidobacteriaceae | 17194  | 2223854 |
| Sample_SCA59.mb.51              | 61.10 | Clostridiales      | 52648  | 1676631 |
| Sample_SCA59.mb.48cbin.1        | 57.90 | Clostridiales      | 26616  | 2080317 |
| Sample_SCA59.mb.115             | 41.70 | Lachnospiraceae    | 26031  | 2676184 |
| Sample_SCA59.mb.46              | 49.50 | Clostridiales      | 17487  | 2339438 |
| Sample_SCA59.Cluster7336        | 43.20 | Bacteria           | 67155  | 4084862 |
| Sample_SCA59.mb.126             | 42.10 | Lachnospiraceae    | 29753  | 2162322 |
| Sample_SCA59.mb.81              | 62.50 | Clostridiales      | 20585  | 1625358 |
| Sample_SCA59.mb.36              | 41.30 | Clostridiales      | 233217 | 2569866 |

|                                 |       |                     |        |         |
|---------------------------------|-------|---------------------|--------|---------|
| Sample_SCA59.mb.130             | 43.80 | Bacteria            | 82837  | 4241656 |
| Sample_SCA59.Cluster8336        | 45.30 | Bacteroidales       | 136143 | 4061519 |
| Sample_SCA59.Cluster5138cbin.1  | 45.10 | Bacteroidales       | 15147  | 4321504 |
| Sample_SCA59.mb.69cbin.1        | 63.20 | Actinobacteria      | 13837  | 2853971 |
| Sample_SCA59.mb.52              | 36.10 | Clostridiales       | 23610  | 2425888 |
| Sample_SCA59.mb.88              | 60.10 | Bacteroidetes       | 48483  | 2327408 |
| Sample_SCA59.mb.86              | 54.90 | Bacteroidetes       | 517187 | 2813988 |
| Sample_SCA59.mb.59cbin.1        | 62.50 | Deltaproteobacteria | 6920   | 2763734 |
| Sample_SCA59.mb.90cbin.1        | 47.30 | Bacteroidales       | 20237  | 3751082 |
| Sample_SCA60.Cluster15187       | 29.40 | Bacteria            | 10625  | 1467804 |
| Sample_SCA60.mb.102             | 52.90 | Clostridiales       | 74824  | 2427178 |
| Sample_SCA60.mb.17cbin.1        | 57.90 | Clostridiales       | 49975  | 3022995 |
| Sample_SCA60.mb.3               | 56.00 | Clostridiales       | 33199  | 1763922 |
| Sample_SCA60.Cluster9736cbin.1  | 43.10 | Clostridiales       | 70140  | 3114210 |
| Sample_SCA60.Cluster5985cbin.1  | 47.90 | Clostridiales       | 83559  | 3054085 |
| Sample_SCA60.Cluster2624cbin.1  | 54.50 | Bacteroidetes       | 104344 | 2031884 |
| Sample_SCA60.Cluster131         | 51.80 | Clostridiales       | 30729  | 1972160 |
| Sample_SCA60.Cluster874         | 59.80 | Actinobacteria      | 146638 | 2187569 |
| Sample_SCA60.Cluster2331cbin.1  | 52.20 | Firmicutes          | 56886  | 2448494 |
| Sample_SCA60.mb.22              | 55.60 | Clostridiales       | 40214  | 2448469 |
| Sample_SCA60.Cluster560cbin.1   | 56.20 | Clostridiales       | 16553  | 2546179 |
| Sample_SCA60.Cluster7540cbin.1  | 43.20 | Lachnospiraceae     | 5957   | 1742322 |
| Sample_SCA60.Cluster2720        | 55.60 | Bacteria            | 183414 | 2685368 |
| Sample_SCA60.Cluster11954cbin.1 | 39.80 | Clostridiales       | 100993 | 2280493 |
| Sample_SCA60.mb.84              | 24.20 | Bacteria            | 53856  | 1027488 |
| Sample_SCA60.mb.24              | 40.70 | Clostridiales       | 15896  | 3797038 |
| Sample_SCA60.Cluster11269cbin.1 | 41.00 | Clostridiales       | 7050   | 2404270 |
| Sample_SCA60.Cluster9931        | 40.80 | Clostridiales       | 121776 | 1944680 |
| Sample_SCA60.mb.25              | 60.40 | Bacteroidetes       | 83793  | 2348060 |
| Sample_SCA60.mb.13cbin.1        | 45.40 | Clostridiales       | 68944  | 1994476 |
| Sample_SCA60.mb.52cbin.1        | 58.60 | Clostridiales       | 5212   | 1593586 |
| Sample_SCA60.mb.104cbin.1       | 60.30 | Bacteroidetes       | 33989  | 2509637 |
| Sample_SCA60.Cluster10224cbin.1 | 41.40 | Lachnospiraceae     | 88211  | 2968389 |
| Sample_SCA60.mb.18              | 41.70 | Clostridiales       | 182190 | 2470232 |
| Sample_SCA60.mb.81cbin.1        | 32.80 | Bacteria            | 73567  | 1918465 |
| Sample_SCA60.mb.96cbin.1        | 47.60 | Clostridiales       | 25955  | 1478531 |
| Sample_SCA60.mb.86              | 36.40 | Clostridiales       | 11038  | 1826438 |
| Sample_SCA60.Cluster10911       | 41.60 | Clostridiales       | 34677  | 2907350 |
| Sample_SCA60.mb.67cbin.1        | 59.40 | Bacteria            | 75588  | 4109085 |
| Sample_SCA60.mb.77              | 49.60 | Clostridiales       | 45623  | 2213397 |
| Sample_SCA60.Cluster5689cbin.1  | 46.00 | Bacteroidales       | 81892  | 3546359 |
| Sample_SCA60.mb.87              | 62.60 | Clostridiales       | 31903  | 1932816 |
| Sample_SCA60.mb.91              | 57.20 | Bacteria            | 56226  | 2528946 |
| Sample_SCA60.mb.83cbin.1        | 45.60 | Clostridiales       | 25631  | 1635989 |
| Sample_SCA60.mb.2cbin.1         | 43.50 | Bacteroidales       | 162200 | 3014229 |
| Sample_SCA60.mb.9cbin.1         | 47.20 | Clostridiales       | 86766  | 2560773 |
| Sample_SCA60.mb.57cbin.1        | 37.30 | Clostridiales       | 50742  | 2781560 |
| Sample_SCA60.Cluster3577cbin.1  | 45.20 | Bacteroidales       | 9516   | 4074368 |
| Sample_SCA60.mb.90cbin.1        | 47.10 | Lachnospiraceae     | 58069  | 3227368 |
| Sample_SCA60.mb.1               | 41.80 | Bacteroidales       | 37702  | 3884369 |
| Sample_SCA60.mb.48cbin.1        | 43.30 | Bacteria            | 49006  | 4030832 |
| Sample_SCA60.mb.92cbin.1        | 26.90 | Clostridiales       | 51178  | 2742095 |
| Sample_SCA60.Cluster205cbin.1   | 51.00 | Enterobacteriaceae  | 24480  | 4684343 |
| Sample_SCA61.mb.12              | 47.20 | Bacteria            | 25914  | 1746227 |
| Sample_SCA61.mb.105             | 58.20 | Clostridiales       | 59067  | 2975325 |
| Sample_SCA61.mb.25              | 38.30 | Clostridiales       | 13589  | 2354516 |
| Sample_SCA61.Cluster3845cbin.1  | 46.70 | Lachnospiraceae     | 102028 | 2135180 |
| Sample_SCA61.mb.2               | 61.00 | Clostridiales       | 76314  | 1902541 |

|                                |       |                    |        |         |
|--------------------------------|-------|--------------------|--------|---------|
| Sample_SCA61.mb.27             | 56.60 | Clostridiales      | 61120  | 2467029 |
| Sample_SCA61.Cluster430        | 58.40 | Bacteroidetes      | 118446 | 2549279 |
| Sample_SCA61.mb.26             | 58.10 | Clostridiales      | 66387  | 2297952 |
| Sample_SCA61.Cluster6157cbin.1 | 40.90 | Clostridiales      | 177443 | 2026691 |
| Sample_SCA61.Cluster26cbin.1   | 59.90 | Clostridiales      | 6973   | 1816355 |
| Sample_SCA61.Cluster7291cbin.1 | 38.00 | Clostridiales      | 178746 | 1879982 |
| Sample_SCA61.mb.47             | 57.90 | Clostridiales      | 33546  | 2085524 |
| Sample_SCA61.Cluster572        | 57.30 | Proteobacteria     | 109781 | 2367611 |
| Sample_SCA61.Cluster8403cbin.1 | 27.10 | Clostridiales      | 50263  | 2662540 |
| Sample_SCA61.Cluster6202cbin.1 | 37.50 | Clostridiales      | 10575  | 2454611 |
| Sample_SCA61.Cluster4540       | 42.30 | Lachnospiraceae    | 15482  | 2513537 |
| Sample_SCA61.mb.16             | 44.10 | Clostridiales      | 28321  | 3076604 |
| Sample_SCA61.mb.52cbin.1       | 52.00 | Clostridiales      | 110974 | 2369266 |
| Sample_SCA61.mb.73             | 62.60 | Clostridiales      | 25411  | 1753002 |
| Sample_SCA61.mb.23cbin.1       | 44.10 | Clostridiales      | 216190 | 2758359 |
| Sample_SCA61.mb.48             | 43.50 | Clostridiales      | 9752   | 2028303 |
| Sample_SCA61.Cluster3533cbin.1 | 43.40 | Bacteria           | 10711  | 3729143 |
| Sample_SCA61.mb.63             | 55.30 | Bacteria           | 319131 | 2677454 |
| Sample_SCA61.mb.95cbin.1       | 48.10 | Clostridiales      | 102844 | 2736216 |
| Sample_SCA61.mb.66cbin.1       | 59.90 | Bacteroidetes      | 148939 | 2569387 |
| Sample_SCA61.mb.80cbin.1       | 60.00 | Bacteroidetes      | 235593 | 2690281 |
| Sample_SCA61.Cluster3102cbin.1 | 44.40 | Bacteroidales      | 100346 | 3512294 |
| Sample_SCA61.Cluster3246       | 45.00 | Bacteroidales      | 95051  | 4434214 |
| Sample_SCA61.Cluster5366cbin.1 | 41.80 | Bacteroidales      | 17329  | 4759122 |
| Sample_SCA61.Cluster3521cbin.1 | 46.50 | Bacteroidales      | 172786 | 4329041 |
| Sample_SCA61.mb.96cbin.1       | 45.70 | Bacteroidales      | 45437  | 3708770 |
| Sample_SCA64.Cluster2709       | 49.30 | Clostridiales      | 73245  | 1764700 |
| Sample_SCA64.Cluster428cbin.1  | 58.10 | Clostridiales      | 61960  | 2929514 |
| Sample_SCA64.mb.101            | 62.00 | Clostridiales      | 14740  | 1619671 |
| Sample_SCA64.mb.68cbin.1       | 60.50 | Bacteria           | 30930  | 1841965 |
| Sample_SCA64.Cluster4036       | 44.90 | Clostridiales      | 125368 | 2570789 |
| Sample_SCA64.mb.25             | 60.20 | Clostridiales      | 53933  | 1912619 |
| Sample_SCA64.mb.36cbin.1       | 45.10 | Actinobacteria     | 18159  | 1888193 |
| Sample_SCA64.mb.102            | 61.50 | Clostridiales      | 49433  | 2418596 |
| Sample_SCA64.mb.33             | 56.40 | Clostridiales      | 101972 | 2344695 |
| Sample_SCA64.Cluster5527cbin.1 | 40.80 | Clostridiales      | 150336 | 2077667 |
| Sample_SCA64.Cluster1692cbin.1 | 51.90 | Firmicutes         | 50036  | 2548179 |
| Sample_SCA64.mb.51             | 51.30 | Clostridiales      | 38320  | 2114775 |
| Sample_SCA64.mb.13cbin.1       | 55.60 | Bacteroidetes      | 24491  | 2579437 |
| Sample_SCA64.mb.1cbin.1        | 59.90 | Bifidobacteriaceae | 11929  | 1792802 |
| Sample_SCA64.mb.43cbin.1       | 60.10 | Actinobacteria     | 13084  | 1943158 |
| Sample_SCA64.mb.10             | 59.30 | Bacteroidetes      | 130105 | 2741646 |
| Sample_SCA64.Cluster336        | 58.10 | Bacteria           | 185474 | 3119347 |
| Sample_SCA64.Cluster4286cbin.1 | 43.40 | Clostridiales      | 154624 | 2999207 |
| Sample_SCA64.Cluster981        | 55.50 | Proteobacteria     | 161344 | 2279582 |
| Sample_SCA64.Cluster6262cbin.1 | 37.20 | Clostridiales      | 55885  | 2804004 |
| Sample_SCA64.mb.4cbin.1        | 37.70 | Lactobacillales    | 38835  | 1768873 |
| Sample_SCA64.Cluster4525       | 43.40 | Bacteroidales      | 164047 | 3024422 |
| Sample_SCA64.mb.91             | 57.70 | Clostridiales      | 25995  | 2117734 |
| Sample_SCA64.mb.48             | 55.70 | Bacteroidales      | 13363  | 2420626 |
| Sample_SCA64.mb.99             | 57.00 | Clostridiales      | 44808  | 2385873 |
| Sample_SCA64.mb.79cbin.1       | 63.80 | Actinobacteria     | 11070  | 2335269 |
| Sample_SCA64.Cluster3798cbin.1 | 40.90 | Lachnospiraceae    | 51561  | 3736133 |
| Sample_SCA64.mb.65cbin.1       | 46.20 | Lachnospiraceae    | 65937  | 3551097 |
| Sample_SCA64.mb.81             | 54.50 | Bacteroidetes      | 100805 | 2154870 |
| Sample_SCA64.mb.75cbin.1       | 59.90 | Bifidobacteriaceae | 99760  | 2212755 |
| Sample_SCA64.mb.60             | 59.20 | Bacteroidetes      | 53905  | 2750262 |
| Sample_SCA64.Cluster2169cbin.1 | 46.80 | Bacteroidales      | 33976  | 3879170 |

|                                |       |                    |        |         |
|--------------------------------|-------|--------------------|--------|---------|
| Sample_SCA64.mb.9              | 57.90 | Clostridiales      | 23811  | 1885899 |
| Sample_SCA64.Cluster2443       | 45.60 | Bacteroidales      | 42467  | 3884223 |
| Sample_SCA64.mb.93cbin.1       | 29.90 | Bacteria           | 46159  | 2524755 |
| Sample_SCA64.Cluster3337       | 45.00 | Bacteroidales      | 226536 | 4579543 |
| Sample_SCA64.mb.74cbin.1       | 44.50 | Bacteroidales      | 66312  | 2915184 |
| Sample_SCA64.mb.77             | 49.00 | Bacteroidales      | 79719  | 3240195 |
| Sample_SCA64.mb.44             | 41.50 | Bacteroidales      | 149274 | 4930952 |
| Sample_SCA65.Cluster3577cbin.1 | 49.40 | Bacteria           | 64523  | 1775109 |
| Sample_SCA65.mb.10             | 52.60 | Bacteria           | 42222  | 2051640 |
| Sample_SCA65.mb.19             | 38.00 | Clostridiales      | 56150  | 2648006 |
| Sample_SCA65.Cluster164cbin.1  | 60.40 | Clostridiales      | 57863  | 2003443 |
| Sample_SCA65.mb.27cbin.1       | 54.70 | Actinobacteria     | 9970   | 1413915 |
| Sample_SCA65.Cluster3800       | 48.40 | Clostridiales      | 108602 | 2806003 |
| Sample_SCA65.mb.13             | 60.90 | Clostridiales      | 55192  | 2337303 |
| Sample_SCA65.mb.7              | 55.60 | Clostridiales      | 8313   | 2157357 |
| Sample_SCA65.Cluster1800cbin.1 | 55.00 | Bacteroidetes      | 126040 | 1946780 |
| Sample_SCA65.Cluster3067cbin.1 | 43.90 | Selenomonadales    | 9179   | 2060210 |
| Sample_SCA65.mb.24cbin.1       | 50.80 | Clostridiales      | 127698 | 2825884 |
| Sample_SCA65.mb.79             | 62.10 | Clostridiales      | 38055  | 2095662 |
| Sample_SCA65.Cluster1344       | 55.40 | Bacteria           | 167612 | 2814531 |
| Sample_SCA65.mb.14cbin.1       | 44.50 | Clostridiales      | 114117 | 2445604 |
| Sample_SCA65.mb.16             | 42.90 | Clostridiales      | 101097 | 2574371 |
| Sample_SCA65.mb.62             | 41.20 | Clostridiales      | 167138 | 2411000 |
| Sample_SCA65.mb.61             | 59.20 | Bacteroidetes      | 124193 | 2883125 |
| Sample_SCA65.mb.82             | 59.30 | Bacteroidetes      | 19701  | 2145927 |
| Sample_SCA65.mb.43             | 40.50 | Clostridiales      | 155868 | 2469088 |
| Sample_SCA65.mb.71cbin.1       | 38.60 | Clostridiales      | 99896  | 2089761 |
| Sample_SCA65.mb.56cbin.1       | 39.30 | Streptococcus      | 13834  | 2160731 |
| Sample_SCA65.mb.92             | 53.50 | Clostridiales      | 503395 | 1931896 |
| Sample_SCA65.mb.54cbin.1       | 37.50 | Clostridiales      | 99831  | 2754805 |
| Sample_SCA65.mb.96             | 63.10 | Actinobacteria     | 165972 | 2972303 |
| Sample_SCA65.Cluster4304cbin.1 | 42.20 | Lachnospiraceae    | 100903 | 3631692 |
| Sample_SCA65.Cluster4074cbin.1 | 42.20 | Bacteria           | 12896  | 4101322 |
| Sample_SCA65.Cluster3562cbin.1 | 46.80 | Bacteroidales      | 141755 | 3985892 |
| Sample_SCA65.mb.66cbin.1       | 42.20 | Bacteroidales      | 43280  | 4155413 |
| Sample_SCA65.mb.37cbin.1       | 45.00 | Bacteroidales      | 143452 | 4709717 |
| Sample_SCA65.mb.25             | 43.30 | Bacteroidales      | 175554 | 5761772 |
| Sample_SCA66.mb.53             | 49.40 | Clostridiales      | 28092  | 1918911 |
| Sample_SCA66.Cluster55cbin.1   | 60.30 | Clostridiales      | 21180  | 1948679 |
| Sample_SCA66.Cluster1328cbin.1 | 52.70 | Clostridiales      | 49438  | 2132576 |
| Sample_SCA66.mb.82             | 26.10 | Bacteria           | 40615  | 1330018 |
| Sample_SCA66.Cluster3505cbin.1 | 46.80 | Lactobacillales    | 72412  | 1989369 |
| Sample_SCA66.mb.64cbin.1       | 36.40 | Clostridiales      | 102123 | 1947956 |
| Sample_SCA66.mb.24cbin.1       | 48.30 | Clostridiales      | 24598  | 2849433 |
| Sample_SCA66.mb.49cbin.1       | 59.40 | Clostridiales      | 11408  | 1883488 |
| Sample_SCA66.Cluster1226       | 54.80 | Bacteroidetes      | 142280 | 1987720 |
| Sample_SCA66.Cluster241cbin.1  | 57.30 | Clostridiales      | 42438  | 3221308 |
| Sample_SCA66.Cluster4855cbin.1 | 44.00 | Clostridiales      | 159303 | 2045865 |
| Sample_SCA66.Cluster7665       | 40.60 | Clostridiales      | 278928 | 2121962 |
| Sample_SCA66.Cluster283        | 55.60 | Bacteria           | 204220 | 2717404 |
| Sample_SCA66.mb.83cbin.1       | 58.20 | Clostridiales      | 50519  | 2986846 |
| Sample_SCA66.Cluster963        | 56.60 | Bifidobacteriaceae | 106606 | 2060479 |
| Sample_SCA66.mb.39cbin.1       | 60.20 | Bifidobacteriaceae | 26990  | 2585226 |
| Sample_SCA66.mb.22cbin.1       | 42.70 | Clostridiales      | 86126  | 2857585 |
| Sample_SCA66.mb.40             | 43.50 | Lachnospiraceae    | 76801  | 2933026 |
| Sample_SCA66.Cluster1132cbin.1 | 55.10 | Proteobacteria     | 114877 | 2865709 |
| Sample_SCA66.mb.7              | 44.30 | Clostridiales      | 59211  | 2652717 |
| Sample_SCA66.Cluster5969       | 43.70 | Bacteroidales      | 336681 | 3214694 |

|                                 |       |                 |        |         |
|---------------------------------|-------|-----------------|--------|---------|
| Sample_SCA66.mb.57              | 26.80 | Clostridiales   | 35551  | 2725497 |
| Sample_SCA66.mb.59cbin.1        | 40.90 | Lachnospiraceae | 39272  | 3186003 |
| Sample_SCA66.mb.80cbin.1        | 59.70 | Bacteroidetes   | 144124 | 2818074 |
| Sample_SCA66.mb.35              | 43.00 | Lachnospiraceae | 71208  | 3181730 |
| Sample_SCA66.mb.71              | 59.50 | Bacteroidetes   | 50026  | 2576988 |
| Sample_SCA66.Cluster6953cbin.1  | 43.10 | Bacteria        | 79454  | 3930120 |
| Sample_SCA66.mb.84              | 46.70 | Lachnospiraceae | 54321  | 3331815 |
| Sample_SCA66.mb.44              | 59.20 | Bacteroidetes   | 41898  | 3117763 |
| Sample_SCA66.Cluster4395cbin.1  | 45.00 | Bacteroidales   | 122841 | 4455315 |
| Sample_SCA66.mb.92cbin.1        | 40.70 | Bacteroidales   | 38666  | 3013469 |
| Sample_SCA66.mb.62cbin.1        | 41.20 | Bacteroidales   | 68215  | 4463504 |
| Sample_SCA66.mb.88cbin.1        | 46.30 | Bacteroidales   | 19788  | 3653648 |
| Sample_SCA67.mb.128cbin.1       | 53.90 | Clostridia      | 9749   | 1610926 |
| Sample_SCA67.mb.121             | 52.90 | Clostridia      | 71950  | 2109906 |
| Sample_SCA67.mb.106             | 58.30 | Clostridiales   | 71319  | 2008215 |
| Sample_SCA67.mb.59              | 26.30 | Bacteria        | 46036  | 1308293 |
| Sample_SCA67.mb.103             | 56.10 | Clostridiales   | 18817  | 2258235 |
| Sample_SCA67.mb.111cbin.1       | 51.80 | Clostridiales   | 14163  | 2095038 |
| Sample_SCA67.Cluster5052        | 51.40 | Bacteroidales   | 51966  | 2232864 |
| Sample_SCA67.mb.29cbin.1        | 57.90 | Clostridiales   | 8750   | 1987804 |
| Sample_SCA67.mb.112cbin.1       | 56.10 | Clostridiales   | 109534 | 2536605 |
| Sample_SCA67.Cluster3344cbin.1  | 54.30 | Bacteroidetes   | 94333  | 2300561 |
| Sample_SCA67.Cluster15592cbin.1 | 37.70 | Clostridiales   | 6952   | 2334456 |
| Sample_SCA67.mb.68cbin.1        | 49.30 | Bacteria        | 11599  | 1850013 |
| Sample_SCA67.mb.52cbin.1        | 46.40 | Clostridiales   | 78442  | 1889798 |
| Sample_SCA67.mb.124cbin.1       | 45.30 | Prevotella      | 17065  | 3189394 |
| Sample_SCA67.mb.21              | 56.10 | Bacteroidetes   | 8089   | 2226230 |
| Sample_SCA67.mb.90              | 52.50 | Clostridiales   | 62630  | 2111722 |
| Sample_SCA67.Cluster9603cbin.1  | 43.70 | Lachnospiraceae | 22600  | 2769579 |
| Sample_SCA67.mb.11cbin.1        | 38.60 | Streptococcus   | 26915  | 1883337 |
| Sample_SCA67.mb.13              | 53.50 | Clostridiales   | 31284  | 2269000 |
| Sample_SCA67.mb.32              | 43.00 | Clostridiales   | 7672   | 2116838 |
| Sample_SCA67.mb.78              | 57.10 | Clostridiales   | 30750  | 2426355 |
| Sample_SCA67.mb.42cbin.1        | 41.70 | Clostridiales   | 132890 | 2453547 |
| Sample_SCA67.mb.63              | 48.20 | Bacteroidales   | 23882  | 2679156 |
| Sample_SCA67.mb.88              | 62.20 | Clostridiales   | 81393  | 2012059 |
| Sample_SCA67.mb.1               | 43.30 | Bacteroidales   | 172551 | 3161982 |
| Sample_SCA67.mb.96              | 45.00 | Clostridiales   | 102694 | 2461233 |
| Sample_SCA67.mb.41              | 41.70 | Lachnospiraceae | 70959  | 2632662 |
| Sample_SCA67.mb.6cbin.1         | 43.00 | Clostridiales   | 242039 | 2783838 |
| Sample_SCA67.mb.91              | 38.80 | Clostridiales   | 72450  | 2051872 |
| Sample_SCA67.mb.97              | 44.60 | Clostridiales   | 124712 | 2218220 |
| Sample_SCA67.mb.92cbin.1        | 60.70 | Bacteroidetes   | 13203  | 2575480 |
| Sample_SCA67.mb.81              | 59.40 | Clostridiales   | 76693  | 3391301 |
| Sample_SCA68.Cluster11483       | 26.50 | Bacteria        | 115859 | 1306973 |
| Sample_SCA68.Cluster11308       | 29.40 | Bacteria        | 56400  | 1449726 |
| Sample_SCA68.Cluster1343cbin.1  | 53.50 | Clostridiales   | 53340  | 1819356 |
| Sample_SCA68.Cluster215cbin.1   | 59.60 | Clostridiales   | 79211  | 2201846 |
| Sample_SCA68.Cluster53          | 61.80 | Clostridiales   | 74005  | 1514659 |
| Sample_SCA68.mb.76              | 26.80 | Bacteria        | 26642  | 1196872 |
| Sample_SCA68.mb.69              | 49.60 | Clostridiales   | 118471 | 2065927 |
| Sample_SCA68.mb.34cbin.1        | 47.40 | Lactobacillales | 5520   | 1321831 |
| Sample_SCA68.mb.74cbin.1        | 53.20 | Clostridia      | 43978  | 1945729 |
| Sample_SCA68.mb.17              | 59.80 | Clostridiales   | 65574  | 2144320 |
| Sample_SCA68.mb.31              | 58.00 | Clostridiales   | 46161  | 2062357 |
| Sample_SCA68.mb.39              | 54.40 | Clostridiales   | 36421  | 2060664 |
| Sample_SCA68.mb.49              | 58.30 | Clostridiales   | 70825  | 2151807 |
| Sample_SCA68.Cluster224cbin.1   | 59.50 | Clostridiales   | 124943 | 2365505 |

|                                |       |                     |        |         |
|--------------------------------|-------|---------------------|--------|---------|
| Sample_SCA68.mb.27             | 52.10 | Clostridiales       | 23683  | 2430819 |
| Sample_SCA68.Cluster615cbin.1  | 55.90 | Clostridiales       | 48253  | 3393815 |
| Sample_SCA68.mb.62             | 61.00 | Bacteria            | 55825  | 4614005 |
| Sample_SCA68.Cluster1382cbin.1 | 53.40 | Clostridiales       | 176255 | 1956176 |
| Sample_SCA68.mb.30cbin.1       | 51.00 | Firmicutes          | 37272  | 2238454 |
| Sample_SCA68.mb.45             | 48.00 | Clostridiales       | 15953  | 1819048 |
| Sample_SCA68.Cluster2827cbin.1 | 51.70 | Clostridiales       | 133374 | 2234202 |
| Sample_SCA68.Cluster10198      | 38.10 | Lactobacillus       | 113554 | 1849765 |
| Sample_SCA68.mb.79             | 61.10 | Clostridiales       | 82633  | 2036093 |
| Sample_SCA68.mb.64cbin.1       | 59.90 | Bacteroidetes       | 51890  | 2616204 |
| Sample_SCA68.mb.38             | 37.30 | Clostridiales       | 75793  | 2737066 |
| Sample_SCA68.Cluster8245       | 41.40 | Lachnospiraceae     | 90472  | 2888966 |
| Sample_SCA68.mb.6              | 58.70 | Bacteroidetes       | 71521  | 3059692 |
| Sample_SCA68.mb.65cbin.1       | 38.20 | Clostridiales       | 81153  | 2543328 |
| Sample_SCA68.mb.81             | 44.40 | Clostridiales       | 142843 | 2275996 |
| Sample_SCA68.Cluster5605cbin.1 | 46.40 | Bacteroidales       | 136755 | 4453274 |
| Sample_SCA68.mb.72cbin.1       | 41.80 | Bacteroidales       | 36833  | 5065285 |
| Sample_SCA68.mb.51cbin.1       | 51.00 | Enterobacteriaceae  | 25132  | 4354148 |
| Sample_SCA69.Cluster5198cbin.1 | 49.60 | Clostridiales       | 117748 | 1979438 |
| Sample_SCA69.Cluster249cbin.1  | 59.00 | Clostridiales       | 115998 | 2207553 |
| Sample_SCA69.Cluster361cbin.1  | 58.00 | Clostridiales       | 6565   | 1597231 |
| Sample_SCA69.mb.20             | 58.30 | Clostridiales       | 30138  | 2972581 |
| Sample_SCA69.Cluster65cbin.1   | 62.30 | Actinobacteria      | 157814 | 2284433 |
| Sample_SCA69.Cluster3856       | 52.30 | Clostridiales       | 151556 | 2318349 |
| Sample_SCA69.Cluster1774cbin.1 | 58.20 | Clostridiales       | 30684  | 2778700 |
| Sample_SCA69.Cluster851        | 56.20 | Bacteroidetes       | 5079   | 2002486 |
| Sample_SCA69.Cluster974cbin.1  | 60.00 | Actinobacteria      | 30447  | 2202258 |
| Sample_SCA69.mb.34             | 41.40 | Clostridiales       | 24922  | 2968125 |
| Sample_SCA69.Cluster6cbin.1    | 64.30 | Deltaproteobacteria | 8389   | 2179547 |
| Sample_SCA69.Cluster12637      | 30.90 | Euryarchaeota       | 106061 | 1788490 |
| Sample_SCA69.Cluster2119       | 56.50 | Selenomonadales     | 74679  | 2058580 |
| Sample_SCA69.Cluster12106      | 32.80 | Lactobacillales     | 7968   | 1616494 |
| Sample_SCA69.Cluster1131cbin.1 | 58.40 | Bifidobacteriaceae  | 155728 | 2436576 |
| Sample_SCA69.mb.40cbin.1       | 62.10 | Clostridiales       | 40695  | 1955481 |
| Sample_SCA69.mb.26cbin.1       | 56.00 | Clostridiales       | 84571  | 2617104 |
| Sample_SCA69.Cluster171cbin.1  | 58.90 | Clostridiales       | 13354  | 3017823 |
| Sample_SCA69.Cluster347        | 59.50 | Clostridiales       | 51976  | 2029345 |
| Sample_SCA69.Cluster8586cbin.1 | 44.50 | Clostridiales       | 158480 | 2616692 |
| Sample_SCA69.mb.42cbin.1       | 60.30 | Clostridiales       | 76641  | 2519145 |
| Sample_SCA69.mb.24             | 51.60 | Clostridiales       | 124023 | 2107515 |
| Sample_SCA69.mb.21cbin.1       | 59.20 | Bifidobacteriaceae  | 101672 | 2291651 |
| Sample_SCA69.mb.22             | 54.60 | Bacteroidetes       | 74130  | 2315655 |
| Sample_SCA69.Cluster8764       | 41.70 | Lachnospiraceae     | 24432  | 2635590 |
| Sample_SCA69.Cluster6685cbin.1 | 44.70 | Prevotella          | 65741  | 3565019 |
| Sample_SCA69.mb.54             | 59.40 | Clostridiales       | 86079  | 2071164 |
| Sample_SCA69.mb.31             | 51.20 | Firmicutes          | 35168  | 2217023 |
| Sample_SCA69.mb.78             | 52.80 | Clostridia          | 64869  | 2108323 |
| Sample_SCA69.mb.100cbin.1      | 42.00 | Lachnospiraceae     | 10840  | 2213885 |
| Sample_SCA69.mb.46             | 63.00 | Bifidobacteriaceae  | 41121  | 1953239 |
| Sample_SCA69.mb.64cbin.1       | 61.30 | Bacteria            | 21410  | 4483441 |
| Sample_SCA69.mb.73             | 59.70 | Clostridiales       | 67764  | 2213865 |
| Sample_SCA69.mb.66             | 56.80 | Clostridiales       | 5207   | 2080545 |
| Sample_SCA69.mb.55cbin.1       | 51.40 | Lactobacillales     | 7295   | 1527073 |
| Sample_SCA69.Cluster7739cbin.1 | 43.30 | Bacteria            | 73228  | 4149476 |
| Sample_SCA69.Cluster7332       | 45.20 | Bacteroidales       | 57757  | 4369857 |
| Sample_SCA69.Cluster7186cbin.1 | 46.40 | Bacteroidales       | 112543 | 4218592 |
| Sample_SCA69.mb.52             | 41.60 | Clostridiales       | 81020  | 3520020 |
| Sample_SCA69.mb.75cbin.1       | 60.10 | Bifidobacteriaceae  | 33970  | 2295609 |

|                                 |       |                    |        |         |
|---------------------------------|-------|--------------------|--------|---------|
| Sample_SCA69.mb.86              | 60.30 | Bacteroidetes      | 31075  | 2548679 |
| Sample_SCA69.mb.87              | 58.50 | Bacteria           | 38161  | 2856199 |
| Sample_SCA69.Cluster1375cbin.1  | 50.30 | Enterobacteriaceae | 40769  | 4778128 |
| Sample_SCA69.mb.72              | 43.50 | Bacteroidales      | 121224 | 2750715 |
| Sample_SCA69.mb.76              | 42.10 | Bacteroidales      | 96658  | 4244974 |
| Sample_SCA69.Cluster810         | 57.40 | Enterobacteriaceae | 102882 | 4920422 |
| Sample_SCA70.Cluster4533cbin.1  | 53.20 | Clostridia         | 39386  | 1891670 |
| Sample_SCA70.Cluster1750cbin.1  | 59.40 | Clostridiales      | 18720  | 1771899 |
| Sample_SCA70.Cluster362cbin.1   | 62.00 | Clostridiales      | 29434  | 1677199 |
| Sample_SCA70.mb.109cbin.1       | 55.40 | Clostridia         | 11875  | 2319737 |
| Sample_SCA70.Cluster572cbin.1   | 56.00 | Clostridiales      | 32983  | 2672085 |
| Sample_SCA70.Cluster4600cbin.1  | 51.80 | Clostridiales      | 105697 | 2892041 |
| Sample_SCA70.Cluster10417cbin.1 | 44.70 | Lachnospiraceae    | 105701 | 2871529 |
| Sample_SCA70.Cluster4264cbin.1  | 49.90 | Bacteroidales      | 17434  | 2473942 |
| Sample_SCA70.mb.14              | 49.60 | Clostridiales      | 31959  | 1851677 |
| Sample_SCA70.mb.132cbin.1       | 36.40 | Clostridiales      | 142616 | 1900756 |
| Sample_SCA70.mb.103cbin.1       | 54.00 | Clostridiales      | 28009  | 1961826 |
| Sample_SCA70.Cluster4846        | 53.30 | Clostridiales      | 139876 | 2096464 |
| Sample_SCA70.Cluster7775        | 47.60 | Selenomonadales    | 69133  | 2120249 |
| Sample_SCA70.Cluster8429cbin.1  | 47.20 | Clostridiales      | 56403  | 2588782 |
| Sample_SCA70.Cluster5559cbin.1  | 49.10 | Bacteroidales      | 159374 | 3067500 |
| Sample_SCA70.mb.112             | 51.50 | Bacteroidetes      | 49071  | 3099468 |
| Sample_SCA70.mb.116             | 59.30 | Clostridiales      | 31905  | 1794964 |
| Sample_SCA70.Cluster2459cbin.1  | 52.80 | Bacteroidales      | 63013  | 2382548 |
| Sample_SCA70.Cluster11952cbin.1 | 41.50 | Lachnospiraceae    | 34237  | 2699953 |
| Sample_SCA70.Cluster10895cbin.1 | 45.20 | Prevotella         | 36797  | 3540701 |
| Sample_SCA70.mb.37cbin.1        | 57.10 | Clostridiales      | 42758  | 2442009 |
| Sample_SCA70.Cluster4626cbin.1  | 49.50 | Bacteroidales      | 20047  | 2801022 |
| Sample_SCA70.mb.34              | 60.00 | Clostridiales      | 10820  | 2142531 |
| Sample_SCA70.mb.115             | 63.10 | Proteobacteria     | 7622   | 1866664 |
| Sample_SCA70.mb.43cbin.1        | 56.80 | Clostridiales      | 37982  | 2289568 |
| Sample_SCA70.mb.87cbin.1        | 57.30 | Clostridiales      | 17085  | 2980560 |
| Sample_SCA70.mb.28              | 44.10 | Lachnospiraceae    | 59172  | 2966972 |
| Sample_SCA70.Cluster8153cbin.1  | 43.10 | Bacteria           | 5660   | 3309193 |
| Sample_SCA70.mb.47              | 44.70 | Rhodospirillales   | 17537  | 2013282 |
| Sample_SCA70.mb.18              | 41.00 | Clostridiales      | 77929  | 2553678 |
| Sample_SCA70.mb.36cbin.1        | 48.20 | Bacteroidales      | 11474  | 3705654 |
| Sample_SCA70.mb.40cbin.1        | 56.10 | Clostridiales      | 10985  | 2472499 |
| Sample_SCA70.mb.70cbin.1        | 46.80 | Lachnospiraceae    | 53735  | 3254323 |
| Sample_SCA70.mb.82cbin.1        | 31.30 | Euryarchaeota      | 73006  | 1713250 |
| Sample_SCA70.mb.69cbin.1        | 46.10 | Prevotella         | 37943  | 2867121 |
| Sample_SCA70.mb.83cbin.1        | 41.80 | Clostridiales      | 129917 | 2434730 |
| Sample_SCA70.mb.90              | 38.80 | Clostridiales      | 81259  | 2049010 |
| Sample_SCA70.mb.84cbin.1        | 44.50 | Clostridiales      | 42828  | 2602063 |
| Sample_SCA70.mb.7cbin.1         | 36.80 | Clostridiales      | 90041  | 2901999 |
| Sample_SCA70.mb.86cbin.1        | 50.10 | Bacteroidales      | 56867  | 2431410 |
| Sample_SCA70.Cluster527cbin.1   | 50.80 | Enterobacteriaceae | 19745  | 4406554 |
| Sample_SCA70.mb.65cbin.1        | 42.30 | Bacteroidales      | 33487  | 4866370 |
| Sample_SCB55.Cluster15779       | 29.50 | Bacteria           | 87829  | 1505158 |
| Sample_SCB55.Cluster6784cbin.1  | 46.10 | Clostridia         | 44705  | 1754948 |
| Sample_SCB55.mb.132cbin.1       | 49.20 | Bacteria           | 119649 | 1915279 |
| Sample_SCB55.Cluster5577cbin.1  | 49.60 | Clostridiales      | 11566  | 1763647 |
| Sample_SCB55.mb.26              | 63.00 | Bacteria           | 8031   | 1809583 |
| Sample_SCB55.Cluster142         | 62.10 | Clostridiales      | 10078  | 1404160 |
| Sample_SCB55.Cluster15984       | 28.00 | Euryarchaeota      | 126133 | 1775851 |
| Sample_SCB55.mb.128             | 32.10 | Bacteria           | 371778 | 1929374 |
| Sample_SCB55.mb.123             | 36.40 | Clostridiales      | 181940 | 1874662 |
| Sample_SCB55.Cluster15282       | 33.60 | Bacteria           | 18524  | 2004203 |

|                                 |       |                     |        |         |
|---------------------------------|-------|---------------------|--------|---------|
| Sample_SCB55.Cluster5831        | 45.00 | Clostridiales       | 118229 | 2487528 |
| Sample_SCB55.mb.2               | 52.00 | Clostridiales       | 17209  | 2028199 |
| Sample_SCB55.mb.111             | 52.90 | Clostridiales       | 39227  | 2143503 |
| Sample_SCB55.mb.62              | 47.70 | Clostridiales       | 307064 | 1469264 |
| Sample_SCB55.mb.20              | 60.80 | Clostridiales       | 55819  | 1821826 |
| Sample_SCB55.Cluster1195        | 58.60 | Veillonellaceae     | 376481 | 2350824 |
| Sample_SCB55.Cluster13242       | 36.70 | Gammaproteobacteria | 80460  | 2244451 |
| Sample_SCB55.mb.39              | 61.10 | Clostridiales       | 59782  | 1903007 |
| Sample_SCB55.Cluster9473cbin.1  | 44.50 | Clostridiales       | 84458  | 2195553 |
| Sample_SCB55.Cluster13869cbin.1 | 37.40 | Clostridiales       | 85367  | 2587601 |
| Sample_SCB55.mb.57              | 46.60 | Clostridiales       | 75279  | 1885225 |
| Sample_SCB55.mb.49cbin.1        | 51.50 | Bacteroidetes       | 100714 | 3202315 |
| Sample_SCB55.mb.52cbin.1        | 47.70 | Lachnospiraceae     | 12077  | 2303235 |
| Sample_SCB55.mb.25              | 53.90 | Clostridiales       | 163647 | 1869565 |
| Sample_SCB55.mb.96              | 58.40 | Clostridiales       | 14334  | 2882431 |
| Sample_SCB55.mb.1cbin.1         | 60.30 | Bifidobacteriaceae  | 21779  | 1881671 |
| Sample_SCB55.mb.107cbin.1       | 50.00 | Lachnospiraceae     | 26253  | 2753285 |
| Sample_SCB55.mb.58              | 43.70 | Lachnospiraceae     | 25100  | 2715955 |
| Sample_SCB55.mb.71              | 46.90 | Clostridiales       | 10306  | 2073510 |
| Sample_SCB55.mb.7               | 36.10 | Clostridiales       | 157699 | 2376331 |
| Sample_SCB55.mb.94cbin.1        | 38.80 | Clostridiales       | 68421  | 2065479 |
| Sample_SCB55.mb.97              | 44.10 | Clostridiales       | 91069  | 2765225 |
| Sample_SCB55.mb.83              | 43.40 | Bacteroidales       | 33178  | 3022061 |
| Sample_SCB55.mb.61cbin.1        | 40.70 | Lachnospiraceae     | 55102  | 4901640 |
| Sample_SCB55.mb.17cbin.1        | 55.90 | Enterobacteriaceae  | 217857 | 5413308 |
| Sample_SCB58.Cluster2238cbin.1  | 53.20 | Clostridia          | 8201   | 1720881 |
| Sample_SCB58.Cluster251cbin.1   | 59.60 | Clostridiales       | 126901 | 2068199 |
| Sample_SCB58.Cluster7841        | 48.70 | Clostridia          | 372071 | 1490335 |
| Sample_SCB58.Cluster17584cbin.1 | 59.30 | Clostridiales       | 54614  | 2102354 |
| Sample_SCB58.Cluster323cbin.1   | 56.40 | Clostridiales       | 9214   | 1987319 |
| Sample_SCB58.mb.102             | 41.20 | Bacteria            | 17417  | 3390979 |
| Sample_SCB58.Cluster16941cbin.1 | 34.10 | Bacilli             | 39590  | 2721059 |
| Sample_SCB58.Cluster4731        | 54.20 | Actinobacteria      | 152194 | 1703612 |
| Sample_SCB58.Cluster533         | 59.50 | Clostridiales       | 47572  | 1861117 |
| Sample_SCB58.Cluster14393cbin.1 | 42.00 | Clostridiales       | 7235   | 2019148 |
| Sample_SCB58.mb.100             | 58.40 | Clostridia          | 14296  | 2613523 |
| Sample_SCB58.Cluster14600cbin.1 | 40.90 | Clostridiales       | 185266 | 2073635 |
| Sample_SCB58.mb.21              | 26.60 | Bacteria            | 67193  | 1224822 |
| Sample_SCB58.Cluster11721cbin.1 | 44.50 | Clostridiales       | 144704 | 2251802 |
| Sample_SCB58.Cluster5432cbin.1  | 48.50 | Firmicutes          | 35133  | 1768427 |
| Sample_SCB58.mb.10              | 61.90 | Clostridiales       | 71047  | 1695474 |
| Sample_SCB58.Cluster1280        | 55.70 | Bacteria            | 175223 | 2786268 |
| Sample_SCB58.mb.103cbin.1       | 43.90 | Clostridiales       | 19167  | 2740213 |
| Sample_SCB58.mb.135             | 60.70 | Actinobacteria      | 59577  | 1785303 |
| Sample_SCB58.mb.126cbin.1       | 57.60 | Clostridiales       | 51794  | 3272749 |
| Sample_SCB58.Cluster3866cbin.1  | 59.40 | Bacteroidetes       | 148322 | 2954661 |
| Sample_SCB58.mb.43              | 26.20 | Bacteria            | 72446  | 1163235 |
| Sample_SCB58.mb.15              | 48.60 | Clostridiales       | 73451  | 1768652 |
| Sample_SCB58.Cluster6185        | 51.40 | Clostridiales       | 161524 | 2166524 |
| Sample_SCB58.Cluster11768       | 42.50 | Lachnospiraceae     | 67600  | 2210435 |
| Sample_SCB58.Cluster725         | 60.20 | Bifidobacteriaceae  | 145651 | 2240692 |
| Sample_SCB58.mb.132cbin.1       | 49.00 | Clostridiales       | 13139  | 2455010 |
| Sample_SCB58.mb.76              | 24.00 | Bacteria            | 27395  | 895035  |
| Sample_SCB58.mb.116             | 56.40 | Clostridiales       | 12766  | 2370035 |
| Sample_SCB58.mb.32cbin.1        | 61.40 | Clostridiales       | 20225  | 1870887 |
| Sample_SCB58.mb.59              | 58.80 | Clostridiales       | 22468  | 2351935 |
| Sample_SCB58.mb.9               | 53.70 | Clostridia          | 41518  | 1689914 |



|                                 |       |                     |        |         |
|---------------------------------|-------|---------------------|--------|---------|
| Sample_SCB58.mb.34cbin.1        | 61.90 | Clostridiales       | 28872  | 2767597 |
| Sample_SCB58.mb.39cbin.1        | 54.90 | Bacteroidetes       | 174613 | 1968116 |
| Sample_SCB58.mb.87cbin.1        | 37.00 | Clostridiales       | 17027  | 2795949 |
| Sample_SCB58.mb.31              | 59.90 | Bacteroidetes       | 104783 | 2652747 |
| Sample_SCB58.mb.35              | 44.00 | Clostridiales       | 46533  | 2800178 |
| Sample_SCB58.Cluster11034cbin.1 | 41.60 | Bacteroidales       | 55582  | 4556945 |
| Sample_SCB58.mb.7               | 56.90 | Clostridiales       | 63827  | 2671458 |
| Sample_SCB58.Cluster9840cbin.1  | 42.80 | Bacteria            | 80243  | 4162187 |
| Sample_SCB58.mb.49              | 57.60 | Proteobacteria      | 57973  | 2172433 |
| Sample_SCB58.mb.20              | 58.80 | Bacteroidetes       | 164032 | 3093332 |
| Sample_SCB58.mb.66              | 60.30 | Clostridiales       | 29926  | 2444506 |
| Sample_SCB58.mb.46              | 36.10 | Clostridiales       | 23329  | 2419689 |
| Sample_SCB58.mb.48              | 43.80 | Clostridiales       | 80777  | 2768895 |
| Sample_SCB58.Cluster6891cbin.1  | 42.60 | Bacteria            | 14750  | 4907150 |
| Sample_SCB58.Cluster9211        | 45.00 | Bacteroidales       | 226527 | 4622203 |
| Sample_SCB58.mb.111             | 45.40 | Bacteroidales       | 110106 | 3921790 |
| Sample_SCB58.mb.96cbin.1        | 64.00 | Actinobacteria      | 9982   | 2439219 |
| Sample_SCB58.mb.97cbin.1        | 43.30 | Bacteroidales       | 158408 | 3098056 |
| Sample_SCB58.mb.60              | 56.10 | Enterobacteriaceae  | 56290  | 4767150 |
| Sample_SCB59.Cluster161cbin.1   | 61.80 | Clostridiales       | 14980  | 1725468 |
| Sample_SCB59.Cluster480         | 58.70 | Clostridiales       | 120101 | 2361164 |
| Sample_SCB59.Cluster11926cbin.1 | 42.80 | Clostridiales       | 151700 | 2003082 |
| Sample_SCB59.mb.142             | 37.30 | Clostridiales       | 28103  | 2475223 |
| Sample_SCB59.mb.28              | 53.20 | Clostridiales       | 7854   | 1631932 |
| Sample_SCB59.Cluster12411       | 40.60 | Clostridiales       | 132221 | 2134640 |
| Sample_SCB59.mb.135cbin.1       | 27.40 | Euryarchaeota       | 20407  | 1792066 |
| Sample_SCB59.mb.124cbin.1       | 56.70 | Clostridiales       | 22272  | 2238027 |
| Sample_SCB59.mb.43cbin.1        | 49.20 | Clostridiales       | 76297  | 1981785 |
| Sample_SCB59.Cluster4224cbin.1  | 51.90 | Clostridiales       | 132719 | 2346457 |
| Sample_SCB59.mb.49              | 59.40 | Clostridia          | 48765  | 2518553 |
| Sample_SCB59.mb.17cbin.1        | 45.40 | Actinobacteria      | 216632 | 1671109 |
| Sample_SCB59.mb.25              | 43.90 | Clostridiales       | 30373  | 2662972 |
| Sample_SCB59.mb.107             | 58.40 | Bacteroidetes       | 368914 | 2565264 |
| Sample_SCB59.mb.16cbin.1        | 59.20 | Clostridiales       | 10317  | 2197458 |
| Sample_SCB59.mb.81              | 27.90 | Bacteria            | 66775  | 928581  |
| Sample_SCB59.mb.127             | 63.10 | Actinobacteria      | 12303  | 2604673 |
| Sample_SCB59.mb.109             | 44.40 | Clostridiales       | 54297  | 2486112 |
| Sample_SCB59.mb.118             | 31.10 | Euryarchaeota       | 112722 | 1771141 |
| Sample_SCB59.mb.4cbin.1         | 44.20 | Clostridiales       | 48187  | 2361674 |
| Sample_SCB59.mb.113cbin.1       | 58.30 | Bacteria            | 26819  | 2999649 |
| Sample_SCB59.mb.51              | 59.30 | Clostridiales       | 21693  | 1709469 |
| Sample_SCB59.Cluster32cbin.1    | 62.10 | Deltaproteobacteria | 11803  | 3094583 |
| Sample_SCB59.mb.101cbin.1       | 58.70 | Bifidobacteriaceae  | 35230  | 2321912 |
| Sample_SCB59.mb.18              | 54.90 | Bacteroidetes       | 56768  | 2083377 |
| Sample_SCB59.mb.133cbin.1       | 39.70 | Streptococcus       | 7271   | 1877785 |
| Sample_SCB59.mb.94cbin.1        | 59.50 | Actinobacteria      | 30930  | 1688736 |
| Sample_SCB59.mb.63cbin.1        | 56.50 | Clostridiales       | 29212  | 2551845 |
| Sample_SCB59.mb.62cbin.1        | 51.90 | Clostridiales       | 37558  | 2057018 |
| Sample_SCB59.mb.44              | 45.40 | Clostridiales       | 25749  | 2398529 |
| Sample_SCB59.Cluster9671cbin.1  | 43.10 | Bacteria            | 83134  | 4134808 |
| Sample_SCB59.mb.40              | 43.70 | Lachnospiraceae     | 110437 | 2764875 |
| Sample_SCB59.Cluster7227        | 45.30 | Bacteroidales       | 150367 | 4054771 |
| Sample_SCB59.mb.73cbin.1        | 48.80 | Firmicutes          | 32914  | 1860064 |
| Sample_SCB59.mb.141cbin.1       | 47.20 | Bacteroidales       | 18016  | 3735468 |
| Sample_SCB59.mb.97              | 54.40 | Bacteroidetes       | 524173 | 2611020 |
| Sample_SCB59.mb.68              | 43.90 | Bacteria            | 80518  | 4202131 |
| Sample_SCB59.mb.9cbin.1         | 44.70 | Bacteroidales       | 30559  | 4797597 |
| Sample_SCB60.Cluster14735cbin.1 | 29.40 | Bacteria            | 69222  | 1685131 |

|                                 |       |                    |        |         |
|---------------------------------|-------|--------------------|--------|---------|
| Sample_SCB60.Cluster14408       | 32.20 | Bacteria           | 78942  | 1885127 |
| Sample_SCB60.Cluster2146cbin.1  | 38.80 | Clostridiales      | 70111  | 2764910 |
| Sample_SCB60.mb.15              | 24.20 | Bacteria           | 61076  | 1018581 |
| Sample_SCB60.mb.102cbin.1       | 32.80 | Bacteria           | 95309  | 1913970 |
| Sample_SCB60.mb.10              | 43.10 | Clostridiales      | 53674  | 3091811 |
| Sample_SCB60.Cluster242         | 59.80 | Actinobacteria     | 111669 | 2177806 |
| Sample_SCB60.Cluster11239       | 41.10 | Clostridiales      | 118676 | 1747562 |
| Sample_SCB60.mb.135             | 53.00 | Clostridiales      | 45965  | 2341899 |
| Sample_SCB60.Cluster3500cbin.1  | 56.50 | Clostridiales      | 15282  | 2346691 |
| Sample_SCB60.Cluster10627cbin.1 | 38.80 | Clostridiales      | 8904   | 2408872 |
| Sample_SCB60.Cluster1947        | 52.20 | Firmicutes         | 59709  | 2387579 |
| Sample_SCB60.Cluster10659       | 39.50 | Clostridiales      | 98964  | 2136611 |
| Sample_SCB60.Cluster350cbin.1   | 57.80 | Proteobacteria     | 8968   | 2007223 |
| Sample_SCB60.Cluster568cbin.1   | 57.30 | Clostridiales      | 38427  | 3395923 |
| Sample_SCB60.Cluster2276        | 55.60 | Bacteria           | 183414 | 2681987 |
| Sample_SCB60.mb.30cbin.1        | 58.50 | Clostridiales      | 47030  | 2633568 |
| Sample_SCB60.mb.17              | 55.60 | Clostridiales      | 53313  | 2331968 |
| Sample_SCB60.mb.100cbin.1       | 51.80 | Clostridiales      | 11875  | 2020952 |
| Sample_SCB60.mb.76              | 26.00 | Bacteria           | 63995  | 1222152 |
| Sample_SCB60.mb.103cbin.1       | 45.20 | Clostridiales      | 76414  | 2103164 |
| Sample_SCB60.mb.18cbin.1        | 46.90 | Clostridiales      | 58329  | 2808597 |
| Sample_SCB60.mb.36              | 59.30 | Bacteria           | 64836  | 4153191 |
| Sample_SCB60.mb.129             | 42.20 | Clostridiales      | 40891  | 2491768 |
| Sample_SCB60.mb.111cbin.1       | 59.40 | Bacteroidetes      | 41903  | 3028579 |
| Sample_SCB60.mb.24              | 36.50 | Clostridiales      | 390413 | 1719074 |
| Sample_SCB60.mb.57              | 62.10 | Clostridiales      | 36327  | 2065863 |
| Sample_SCB60.mb.72              | 61.80 | Clostridiales      | 12248  | 1985026 |
| Sample_SCB60.mb.67              | 49.40 | Clostridiales      | 71320  | 1803129 |
| Sample_SCB60.mb.32              | 54.30 | Bacteroidetes      | 87975  | 2087466 |
| Sample_SCB60.Cluster8880        | 43.40 | Bacteroidales      | 152065 | 2827593 |
| Sample_SCB60.mb.75              | 40.70 | Clostridiales      | 17979  | 3763005 |
| Sample_SCB60.mb.49cbin.1        | 41.80 | Clostridiales      | 168642 | 2553289 |
| Sample_SCB60.Cluster9407cbin.1  | 41.60 | Clostridiales      | 14799  | 3590406 |
| Sample_SCB60.mb.12cbin.1        | 43.40 | Bacteria           | 42459  | 3956494 |
| Sample_SCB60.mb.82              | 60.30 | Bacteroidetes      | 19587  | 2419098 |
| Sample_SCB60.mb.74cbin.1        | 40.50 | Clostridiales      | 67526  | 2747245 |
| Sample_SCB60.mb.81              | 49.50 | Lachnospiraceae    | 97107  | 2799774 |
| Sample_SCB60.Cluster1292cbin.1  | 57.20 | Enterobacteriaceae | 161665 | 4716094 |
| Sample_SCB61.Cluster2650        | 47.40 | Bacteria           | 42543  | 1690584 |
| Sample_SCB61.mb.103             | 42.00 | Bacteria           | 104871 | 2414395 |
| Sample_SCB61.Cluster8139        | 33.40 | Clostridiales      | 271842 | 2268691 |
| Sample_SCB61.mb.67cbin.1        | 26.90 | Bacteria           | 22443  | 2868720 |
| Sample_SCB61.mb.27              | 38.50 | Clostridiales      | 82991  | 2318227 |
| Sample_SCB61.mb.34              | 58.60 | Clostridiales      | 8426   | 2614031 |
| Sample_SCB61.mb.40cbin.1        | 43.50 | Clostridiales      | 11088  | 2843321 |
| Sample_SCB61.mb.47              | 37.30 | Clostridiales      | 28361  | 2489146 |
| Sample_SCB61.Cluster1101cbin.1  | 54.20 | Bacteroidetes      | 147326 | 1902956 |
| Sample_SCB61.mb.114cbin.1       | 47.70 | Clostridiales      | 103011 | 3034906 |
| Sample_SCB61.Cluster6209        | 38.10 | Clostridiales      | 94503  | 1865364 |
| Sample_SCB61.Cluster5839        | 40.90 | Clostridiales      | 177499 | 2016656 |
| Sample_SCB61.Cluster112         | 55.40 | Bacteria           | 190909 | 2677255 |
| Sample_SCB61.mb.45              | 49.40 | Clostridiales      | 16971  | 2293015 |
| Sample_SCB61.mb.82              | 42.50 | Clostridiales      | 58612  | 2456162 |
| Sample_SCB61.Cluster523         | 57.30 | Proteobacteria     | 109781 | 2350002 |
| Sample_SCB61.mb.50cbin.1        | 46.40 | Lachnospiraceae    | 77649  | 2652589 |
| Sample_SCB61.Cluster4479        | 44.00 | Clostridiales      | 199673 | 2752563 |
| Sample_SCB61.mb.79              | 57.00 | Clostridiales      | 8701   | 2284119 |
| Sample_SCB61.mb.109cbin.1       | 44.10 | Clostridiales      | 42245  | 3362797 |

|                                |       |                     |        |         |
|--------------------------------|-------|---------------------|--------|---------|
| Sample_SCB61.mb.44cbin.1       | 57.60 | Clostridiales       | 41503  | 2315915 |
| Sample_SCB61.mb.31cbin.1       | 40.70 | Lachnospiraceae     | 86015  | 3065846 |
| Sample_SCB61.mb.76cbin.1       | 57.30 | Clostridiales       | 21480  | 2299866 |
| Sample_SCB61.mb.88             | 60.10 | Bacteroidetes       | 184030 | 2439045 |
| Sample_SCB61.mb.3              | 43.60 | Bacteria            | 7467   | 3244892 |
| Sample_SCB61.mb.83             | 43.20 | Lachnospiraceae     | 46241  | 2116464 |
| Sample_SCB61.Cluster4578cbin.1 | 40.50 | Clostridiales       | 33642  | 3908932 |
| Sample_SCB61.mb.91cbin.1       | 59.80 | Bacteroidetes       | 154605 | 2727629 |
| Sample_SCB61.Cluster3478cbin.1 | 46.60 | Bacteroidales       | 183164 | 4085554 |
| Sample_SCB61.mb.94             | 37.50 | Clostridiales       | 140595 | 2537953 |
| Sample_SCB61.mb.99cbin.1       | 45.90 | Bacteroidales       | 45942  | 3668752 |
| Sample_SCB61.mb.90             | 45.00 | Bacteroidales       | 197824 | 4465695 |
| Sample_SCB61.mb.28cbin.1       | 50.50 | Enterobacteriaceae  | 92614  | 4844286 |
| Sample_SCB64.Cluster3052       | 49.30 | Clostridiales       | 78069  | 1795394 |
| Sample_SCB64.mb.29cbin.1       | 29.90 | Bacteria            | 48711  | 2580270 |
| Sample_SCB64.Cluster4934cbin.1 | 51.30 | Clostridiales       | 11740  | 2200837 |
| Sample_SCB64.Cluster7568       | 32.00 | Clostridiales       | 103848 | 2825650 |
| Sample_SCB64.Cluster4325       | 45.00 | Clostridiales       | 102146 | 2588341 |
| Sample_SCB64.Cluster7301cbin.1 | 42.10 | Lachnospiraceae     | 15412  | 2014818 |
| Sample_SCB64.mb.4              | 38.50 | Clostridiales       | 10876  | 2065406 |
| Sample_SCB64.Cluster5490cbin.1 | 41.60 | Clostridiales       | 16517  | 2323362 |
| Sample_SCB64.Cluster3178cbin.1 | 51.90 | Firmicutes          | 41189  | 2525576 |
| Sample_SCB64.Cluster328cbin.1  | 59.40 | Bacteroidetes       | 170144 | 2578286 |
| Sample_SCB64.Cluster1273       | 55.50 | Proteobacteria      | 161474 | 2280828 |
| Sample_SCB64.mb.31             | 57.50 | Clostridiales       | 15686  | 1915006 |
| Sample_SCB64.mb.124cbin.1      | 61.10 | Clostridiales       | 38113  | 2682512 |
| Sample_SCB64.Cluster4422cbin.1 | 46.20 | Lachnospiraceae     | 68424  | 3530733 |
| Sample_SCB64.mb.16             | 60.10 | Actinobacteria      | 14861  | 1979535 |
| Sample_SCB64.Cluster345        | 58.10 | Bacteria            | 158222 | 3114389 |
| Sample_SCB64.Cluster7227       | 40.50 | Clostridiales       | 132547 | 2133843 |
| Sample_SCB64.mb.54cbin.1       | 61.80 | Clostridiales       | 25245  | 1705601 |
| Sample_SCB64.mb.108cbin.1      | 59.90 | Bifidobacteriaceae  | 89780  | 1896888 |
| Sample_SCB64.mb.105cbin.1      | 56.70 | Clostridiales       | 108547 | 2131009 |
| Sample_SCB64.mb.34             | 56.30 | Clostridiales       | 16734  | 2525343 |
| Sample_SCB64.Cluster9343cbin.1 | 36.00 | Clostridiales       | 133721 | 2600357 |
| Sample_SCB64.mb.18cbin.1       | 56.30 | Bifidobacteriaceae  | 127847 | 2170782 |
| Sample_SCB64.mb.67             | 56.10 | Bacteroidales       | 7788   | 2049782 |
| Sample_SCB64.mb.55             | 54.50 | Bacteroidetes       | 86542  | 2103666 |
| Sample_SCB64.Cluster4386cbin.1 | 44.30 | Bacteroidales       | 68498  | 3633190 |
| Sample_SCB64.mb.28             | 60.30 | Deltaproteobacteria | 11035  | 3744551 |
| Sample_SCB64.Cluster4283cbin.1 | 45.00 | Bacteroidales       | 204278 | 4573376 |
| Sample_SCB64.mb.8cbin.1        | 60.60 | Bifidobacteriaceae  | 14799  | 1866873 |
| Sample_SCB64.mb.57cbin.1       | 40.60 | Bacteroidales       | 51255  | 3242110 |
| Sample_SCB64.mb.92             | 44.10 | Clostridiales       | 167716 | 2588658 |
| Sample_SCB64.mb.89             | 57.20 | Clostridiales       | 25310  | 2106242 |
| Sample_SCB64.mb.69cbin.1       | 49.60 | Lachnospiraceae     | 36030  | 2946435 |
| Sample_SCB64.mb.95cbin.1       | 49.50 | Proteobacteria      | 7699   | 1829030 |
| Sample_SCB64.mb.122            | 43.10 | Bacteroidales       | 127987 | 4959259 |
| Sample_SCB64.mb.46cbin.1       | 45.40 | Bacteroidales       | 77153  | 4076781 |
| Sample_SCB64.mb.58cbin.1       | 47.40 | Bacteroidales       | 38462  | 3744213 |
| Sample_SCB64.mb.72             | 48.50 | Bacteroidales       | 116733 | 3283109 |
| Sample_SCB64.mb.81cbin.1       | 40.40 | Lachnospiraceae     | 41859  | 4107393 |
| Sample_SCB65.Cluster2978       | 49.40 | Bacteria            | 62766  | 1774247 |
| Sample_SCB65.mb.19             | 52.70 | Bacteria            | 13953  | 1971828 |
| Sample_SCB65.mb.43cbin.1       | 55.70 | Clostridiales       | 7739   | 1994541 |
| Sample_SCB65.mb.57             | 37.40 | Clostridiales       | 6338   | 2040287 |
| Sample_SCB65.mb.27cbin.1       | 54.30 | Actinobacteria      | 30297  | 1601826 |
| Sample_SCB65.Cluster3240       | 48.40 | Clostridiales       | 107829 | 2772441 |

|                                |       |                    |        |         |
|--------------------------------|-------|--------------------|--------|---------|
| Sample_SCB65.Cluster2325cbin.1 | 44.20 | Selenomonadales    | 7545   | 1913930 |
| Sample_SCB65.mb.34             | 59.30 | Bacteroidetes      | 6098   | 2037522 |
| Sample_SCB65.mb.24cbin.1       | 50.60 | Clostridiales      | 127656 | 2901638 |
| Sample_SCB65.Cluster6701       | 39.00 | Clostridiales      | 114593 | 1988870 |
| Sample_SCB65.Cluster7656cbin.1 | 52.80 | Clostridiales      | 214452 | 2077775 |
| Sample_SCB65.Cluster123        | 55.40 | Bacteria           | 150670 | 2826645 |
| Sample_SCB65.mb.70cbin.1       | 59.80 | Clostridiales      | 27820  | 2330437 |
| Sample_SCB65.mb.54             | 42.90 | Clostridiales      | 11315  | 2209417 |
| Sample_SCB65.Cluster4782cbin.1 | 44.10 | Clostridiales      | 114308 | 2740622 |
| Sample_SCB65.Cluster98cbin.1   | 58.90 | Bacteroidetes      | 95035  | 3032603 |
| Sample_SCB65.mb.10             | 40.40 | Clostridiales      | 143413 | 2578516 |
| Sample_SCB65.mb.3              | 39.90 | Streptococcus      | 19136  | 1994617 |
| Sample_SCB65.mb.66             | 63.20 | Actinobacteria     | 137464 | 2911208 |
| Sample_SCB65.mb.79             | 61.30 | Clostridiales      | 41097  | 2583912 |
| Sample_SCB65.mb.84             | 59.20 | Bacteroidetes      | 32590  | 2074089 |
| Sample_SCB65.Cluster4891cbin.1 | 42.60 | Lachnospiraceae    | 112033 | 3400663 |
| Sample_SCB65.mb.68cbin.1       | 37.30 | Clostridiales      | 96905  | 2565487 |
| Sample_SCB65.mb.72cbin.1       | 58.30 | Clostridiales      | 15442  | 2432271 |
| Sample_SCB65.mb.9cbin.1        | 42.70 | Clostridiales      | 73648  | 2474791 |
| Sample_SCB65.Cluster4119cbin.1 | 42.30 | Bacteria           | 10545  | 4029215 |
| Sample_SCB65.mb.77cbin.1       | 48.40 | Proteobacteria     | 36568  | 2551652 |
| Sample_SCB65.mb.28cbin.1       | 41.60 | Bacteroidales      | 44256  | 4725154 |
| Sample_SCB65.mb.20             | 45.00 | Bacteroidales      | 155251 | 4753409 |
| Sample_SCB65.mb.37             | 41.90 | Bacteroides        | 57522  | 4672102 |
| Sample_SCB65.mb.4cbin.1        | 44.60 | Bacteroidales      | 10224  | 5141288 |
| Sample_SCB65.mb.74cbin.1       | 46.70 | Bacteroidales      | 146744 | 4361538 |
| Sample_SCB65.mb.65cbin.1       | 43.40 | Bacteroidales      | 174079 | 5922940 |
| Sample_SCB66.Cluster9757cbin.1 | 26.70 | Bacteria           | 21815  | 727755  |
| Sample_SCB66.Cluster3087       | 49.40 | Clostridiales      | 96473  | 1985279 |
| Sample_SCB66.Cluster9832cbin.1 | 26.00 | Bacteria           | 81515  | 1358930 |
| Sample_SCB66.mb.113            | 27.50 | Bacteria           | 293700 | 1315577 |
| Sample_SCB66.Cluster314cbin.1  | 58.70 | Clostridiales      | 50980  | 2111596 |
| Sample_SCB66.Cluster326cbin.1  | 59.20 | Clostridiales      | 51916  | 2274283 |
| Sample_SCB66.Cluster6cbin.1    | 62.50 | Clostridiales      | 6996   | 2061457 |
| Sample_SCB66.Cluster2065       | 52.40 | Clostridiales      | 125431 | 2323295 |
| Sample_SCB66.Cluster3667cbin.1 | 46.70 | Lactobacillales    | 87802  | 2025680 |
| Sample_SCB66.Cluster3687cbin.1 | 45.20 | Firmicutes         | 181692 | 1686721 |
| Sample_SCB66.Cluster2786cbin.1 | 43.90 | Selenomonadales    | 10837  | 2132600 |
| Sample_SCB66.Cluster7029       | 40.70 | Clostridiales      | 185054 | 2079885 |
| Sample_SCB66.Cluster332        | 55.60 | Bacteria           | 204989 | 2715287 |
| Sample_SCB66.Cluster1226       | 56.60 | Bifidobacteriaceae | 116818 | 1938995 |
| Sample_SCB66.Cluster7847cbin.1 | 44.00 | Clostridiales      | 166641 | 2077308 |
| Sample_SCB66.mb.23cbin.1       | 48.30 | Clostridiales      | 32328  | 2690658 |
| Sample_SCB66.mb.36cbin.1       | 54.20 | Actinobacteria     | 77059  | 1612860 |
| Sample_SCB66.mb.65             | 52.90 | Clostridia         | 44595  | 2111398 |
| Sample_SCB66.mb.5cbin.1        | 58.20 | Clostridiales      | 66714  | 2908856 |
| Sample_SCB66.Cluster6263       | 32.60 | Lactobacillales    | 51012  | 1915906 |
| Sample_SCB66.Cluster5296cbin.1 | 41.80 | Lachnospiraceae    | 52029  | 2455706 |
| Sample_SCB66.Cluster5056       | 43.10 | Clostridiales      | 137587 | 2612299 |
| Sample_SCB66.Cluster1256cbin.1 | 59.50 | Bacteroidetes      | 14775  | 2778601 |
| Sample_SCB66.mb.107cbin.1      | 40.00 | Streptococcus      | 23364  | 1892347 |
| Sample_SCB66.mb.84             | 36.20 | Clostridiales      | 196270 | 2006701 |
| Sample_SCB66.Cluster9252cbin.1 | 26.70 | Clostridiales      | 54283  | 2767135 |
| Sample_SCB66.Cluster1136cbin.1 | 55.10 | Proteobacteria     | 114877 | 2870622 |
| Sample_SCB66.Cluster3927cbin.1 | 43.30 | Bacteria           | 10955  | 3519182 |
| Sample_SCB66.mb.59             | 54.80 | Bacteroidetes      | 123345 | 2039893 |
| Sample_SCB66.mb.51cbin.1       | 55.80 | Clostridiales      | 12678  | 2517210 |
| Sample_SCB66.mb.85             | 60.50 | Clostridiales      | 20964  | 1897975 |

|                                 |       |                    |        |         |
|---------------------------------|-------|--------------------|--------|---------|
| Sample_SCB66.Cluster5699        | 43.70 | Bacteroidales      | 336434 | 3301060 |
| Sample_SCB66.mb.95cbin.1        | 34.20 | Bacilli            | 6879   | 2396772 |
| Sample_SCB66.mb.40              | 59.50 | Bacteroidetes      | 142711 | 2813964 |
| Sample_SCB66.mb.80              | 47.10 | Lachnospiraceae    | 26305  | 3032742 |
| Sample_SCB66.mb.89cbin.1        | 57.80 | Clostridiales      | 53004  | 2913139 |
| Sample_SCB66.Cluster4043        | 45.20 | Bacteroidales      | 102465 | 4302111 |
| Sample_SCB66.mb.96              | 60.40 | Bifidobacteriaceae | 38591  | 1995155 |
| Sample_SCB66.mb.62              | 44.70 | Clostridiales      | 47720  | 2858068 |
| Sample_SCB66.mb.87              | 44.30 | Clostridiales      | 48881  | 2683804 |
| Sample_SCB66.mb.76              | 58.80 | Bifidobacteriaceae | 103175 | 2396225 |
| Sample_SCB66.mb.30              | 41.90 | Bacteroides        | 64429  | 4439145 |
| Sample_SCB67.Cluster3713cbin.1  | 53.00 | Clostridia         | 30422  | 2072728 |
| Sample_SCB67.Cluster1428        | 56.90 | Clostridiales      | 141760 | 2511719 |
| Sample_SCB67.mb.101             | 48.90 | Bacteria           | 53407  | 2002458 |
| Sample_SCB67.Cluster12262       | 45.00 | Clostridiales      | 74108  | 2631221 |
| Sample_SCB67.Cluster6508        | 50.90 | Bacteroidales      | 57004  | 2141701 |
| Sample_SCB67.Cluster13396cbin.1 | 48.00 | Bacteroidales      | 43724  | 2819522 |
| Sample_SCB67.Cluster10940cbin.1 | 46.50 | Lachnospiraceae    | 72884  | 3004302 |
| Sample_SCB67.Cluster3518        | 54.70 | Bacteroidetes      | 110548 | 1990801 |
| Sample_SCB67.Cluster19cbin.1    | 62.90 | Proteobacteria     | 6221   | 1797209 |
| Sample_SCB67.mb.121             | 62.30 | Clostridiales      | 40298  | 1986077 |
| Sample_SCB67.Cluster6180cbin.1  | 49.40 | Bacteroidales      | 29572  | 2906624 |
| Sample_SCB67.Cluster2274cbin.1  | 55.30 | Bacteroidetes      | 43170  | 2518321 |
| Sample_SCB67.Cluster15509       | 41.60 | Clostridiales      | 172233 | 2357238 |
| Sample_SCB67.mb.24cbin.1        | 36.60 | Clostridiales      | 200362 | 1604743 |
| Sample_SCB67.Cluster6745cbin.1  | 48.50 | Firmicutes         | 34787  | 2035361 |
| Sample_SCB67.mb.123cbin.1       | 54.90 | Clostridiales      | 66311  | 2757152 |
| Sample_SCB67.mb.59cbin.1        | 25.90 | Bacteria           | 43991  | 1240717 |
| Sample_SCB67.mb.142             | 58.10 | Clostridiales      | 75072  | 2191413 |
| Sample_SCB67.Cluster17310cbin.1 | 37.40 | Clostridiales      | 7340   | 2478349 |
| Sample_SCB67.mb.26              | 55.00 | Clostridiales      | 6752   | 2179597 |
| Sample_SCB67.mb.61              | 49.60 | Clostridia         | 13595  | 1778541 |
| Sample_SCB67.mb.10              | 43.00 | Clostridiales      | 228553 | 2641647 |
| Sample_SCB67.Cluster153cbin.1   | 59.30 | Clostridiales      | 37471  | 3486946 |
| Sample_SCB67.mb.12              | 38.70 | Streptococcus      | 24973  | 1702288 |
| Sample_SCB67.mb.138             | 60.70 | Bacteroidetes      | 28110  | 2542160 |
| Sample_SCB67.mb.34              | 56.20 | Clostridiales      | 98557  | 2387787 |
| Sample_SCB67.mb.45              | 51.60 | Clostridiales      | 23552  | 2119592 |
| Sample_SCB67.mb.58cbin.1        | 46.70 | Clostridiales      | 78040  | 1708902 |
| Sample_SCB67.mb.85              | 60.70 | Clostridiales      | 28589  | 1709451 |
| Sample_SCB67.mb.113             | 43.30 | Bacteroidales      | 449157 | 3216735 |
| Sample_SCB67.mb.7cbin.1         | 45.40 | Clostridiales      | 9463   | 2122020 |
| Sample_SCB67.mb.65cbin.1        | 51.90 | Clostridiales      | 11467  | 1945469 |
| Sample_SCB67.Cluster7159        | 45.20 | Bacteroidales      | 17348  | 3958878 |
| Sample_SCB67.mb.44              | 41.80 | Lachnospiraceae    | 82440  | 2461281 |
| Sample_SCB67.mb.76cbin.1        | 52.60 | Bacteroidales      | 72828  | 2670318 |
| Sample_SCB67.mb.117             | 45.50 | Bacteroidales      | 7095   | 3382002 |
| Sample_SCB67.mb.64cbin.1        | 43.80 | Lachnospiraceae    | 22752  | 2601895 |
| Sample_SCB67.mb.80              | 38.80 | Clostridiales      | 61898  | 2058288 |
| Sample_SCB67.mb.95cbin.1        | 45.20 | Clostridiales      | 141579 | 1714693 |
| Sample_SCB67.mb.81              | 44.60 | Clostridiales      | 121990 | 2148163 |
| Sample_SCB67.mb.87              | 43.10 | Clostridiales      | 51394  | 2355597 |
| Sample_SCB68.mb.52              | 26.80 | Bacteria           | 47536  | 980451  |
| Sample_SCB68.Cluster1534cbin.1  | 53.60 | Clostridiales      | 56827  | 1740931 |
| Sample_SCB68.mb.42              | 53.30 | Clostridia         | 11192  | 1858558 |
| Sample_SCB68.mb.29              | 52.50 | Clostridiales      | 39516  | 1998707 |
| Sample_SCB68.mb.8               | 26.40 | Bacteria           | 186811 | 1232246 |
| Sample_SCB68.mb.62cbin.1        | 49.70 | Clostridiales      | 17807  | 1941622 |

|                                 |       |                    |        |         |
|---------------------------------|-------|--------------------|--------|---------|
| Sample_SCB68.mb.16cbin.1        | 56.70 | Clostridiales      | 34734  | 2411844 |
| Sample_SCB68.mb.72              | 58.40 | Clostridiales      | 65200  | 2865049 |
| Sample_SCB68.Cluster1151cbin.1  | 54.20 | Clostridiales      | 59386  | 2064074 |
| Sample_SCB68.Cluster863cbin.1   | 56.40 | Clostridiales      | 80541  | 2086945 |
| Sample_SCB68.Cluster1667cbin.1  | 57.60 | Clostridiales      | 11853  | 2070877 |
| Sample_SCB68.mb.60cbin.1        | 57.40 | Clostridiales      | 63259  | 2319367 |
| Sample_SCB68.mb.49              | 48.20 | Clostridiales      | 5234   | 1471399 |
| Sample_SCB68.Cluster2701        | 54.00 | Clostridiales      | 175548 | 1693333 |
| Sample_SCB68.mb.10              | 59.80 | Bacteroidetes      | 106788 | 2531482 |
| Sample_SCB68.Cluster8682cbin.1  | 38.60 | Clostridiales      | 82488  | 2077969 |
| Sample_SCB68.Cluster2582cbin.1  | 50.90 | Firmicutes         | 45794  | 2277471 |
| Sample_SCB68.Cluster3722cbin.1  | 51.50 | Clostridiales      | 162054 | 2133269 |
| Sample_SCB68.mb.77              | 54.30 | Clostridiales      | 5825   | 2569766 |
| Sample_SCB68.Cluster290         | 59.20 | Bacteroidetes      | 88582  | 2693597 |
| Sample_SCB68.mb.47              | 41.80 | Clostridiales      | 206907 | 2462610 |
| Sample_SCB68.Cluster8783cbin.1  | 38.00 | Lactobacillus      | 100414 | 1872763 |
| Sample_SCB68.mb.51              | 41.40 | Lachnospiraceae    | 68093  | 2839751 |
| Sample_SCB68.mb.68              | 44.60 | Clostridiales      | 123523 | 2343118 |
| Sample_SCB68.Cluster8615cbin.1  | 41.70 | Lachnospiraceae    | 64742  | 2582295 |
| Sample_SCB68.Cluster3863cbin.1  | 46.00 | Bacteroidales      | 10004  | 2916182 |
| Sample_SCB68.mb.2               | 41.80 | Bacteroidales      | 37979  | 4356467 |
| Sample_SCB68.mb.33              | 46.30 | Bacteroidales      | 106534 | 4475512 |
| Sample_SCB68.mb.27cbin.1        | 50.70 | Enterobacteriaceae | 38030  | 4596198 |
| Sample_SCB69.Cluster6357        | 49.50 | Clostridiales      | 106769 | 1884540 |
| Sample_SCB69.Cluster69          | 62.10 | Actinobacteria     | 132406 | 1930478 |
| Sample_SCB69.mb.12              | 53.00 | Actinobacteria     | 41585  | 1775969 |
| Sample_SCB69.mb.110             | 62.50 | Clostridiales      | 81507  | 1779197 |
| Sample_SCB69.mb.123cbin.1       | 41.20 | Clostridiales      | 35362  | 3282699 |
| Sample_SCB69.mb.46              | 51.00 | Clostridia         | 6913   | 1462735 |
| Sample_SCB69.mb.127             | 59.40 | Clostridiales      | 107060 | 2248509 |
| Sample_SCB69.mb.32              | 57.50 | Clostridiales      | 36454  | 1723416 |
| Sample_SCB69.mb.108cbin.1       | 57.60 | Clostridiales      | 27644  | 3207407 |
| Sample_SCB69.Cluster13611       | 30.90 | Euryarchaeota      | 111563 | 1788269 |
| Sample_SCB69.Cluster2393        | 56.30 | Selenomonadales    | 109406 | 2163927 |
| Sample_SCB69.mb.10              | 62.00 | Bacteroidetes      | 38012  | 2536551 |
| Sample_SCB69.mb.28              | 60.00 | Actinobacteria     | 36007  | 2222719 |
| Sample_SCB69.Cluster5203        | 50.50 | Lactobacillales    | 38383  | 1917719 |
| Sample_SCB69.mb.113             | 62.80 | Bifidobacteriaceae | 125604 | 1878253 |
| Sample_SCB69.Cluster12889       | 32.60 | Lactobacillales    | 20888  | 2040497 |
| Sample_SCB69.Cluster10744cbin.1 | 37.70 | Clostridiales      | 13997  | 2501490 |
| Sample_SCB69.Cluster9183        | 44.40 | Clostridiales      | 157984 | 2613500 |
| Sample_SCB69.mb.25cbin.1        | 51.50 | Clostridiales      | 112321 | 2015385 |
| Sample_SCB69.mb.111cbin.1       | 60.20 | Bifidobacteriaceae | 34933  | 2172803 |
| Sample_SCB69.Cluster1157cbin.1  | 58.40 | Bifidobacteriaceae | 155720 | 2322957 |
| Sample_SCB69.Cluster10340cbin.1 | 41.40 | Lachnospiraceae    | 89771  | 2942341 |
| Sample_SCB69.mb.116             | 57.90 | Clostridiales      | 68450  | 2251405 |
| Sample_SCB69.Cluster13349cbin.1 | 41.50 | Lachnospiraceae    | 7091   | 3063496 |
| Sample_SCB69.mb.31              | 58.40 | Bacteria           | 42962  | 2874972 |
| Sample_SCB69.mb.78              | 59.20 | Clostridiales      | 115316 | 1965212 |
| Sample_SCB69.mb.87cbin.1        | 52.80 | Clostridia         | 73140  | 2171311 |
| Sample_SCB69.mb.15              | 43.50 | Bacteroidales      | 127338 | 2972416 |
| Sample_SCB69.Cluster6631cbin.1  | 43.20 | Bacteria           | 66562  | 4075723 |
| Sample_SCB69.mb.122cbin.1       | 43.20 | Lachnospiraceae    | 30117  | 2764106 |
| Sample_SCB69.mb.66cbin.1        | 56.30 | Clostridiales      | 95076  | 2358682 |
| Sample_SCB69.mb.72              | 54.40 | Bacteroidales      | 17897  | 2343910 |
| Sample_SCB69.mb.80cbin.1        | 61.20 | Bacteria           | 15422  | 4485206 |
| Sample_SCB69.mb.82cbin.1        | 60.30 | Clostridiales      | 64151  | 2463951 |
| Sample_SCB69.mb.54              | 45.20 | Prevotella         | 84823  | 3195423 |

|                                 |       |                     |        |         |
|---------------------------------|-------|---------------------|--------|---------|
| Sample_SCB69.mb.97              | 59.90 | Clostridiales       | 64834  | 1866130 |
| Sample_SCB69.mb.91cbin.1        | 52.40 | Clostridiales       | 148687 | 2388406 |
| Sample_SCB69.mb.47              | 41.70 | Clostridiales       | 79933  | 3357273 |
| Sample_SCB69.mb.101             | 42.10 | Bacteroides         | 46917  | 4482880 |
| Sample_SCB69.mb.89cbin.1        | 55.60 | Bacteroidetes       | 10693  | 2584516 |
| Sample_SCB69.mb.94              | 56.60 | Clostridiales       | 6975   | 2320634 |
| Sample_SCB69.mb.99cbin.1        | 51.10 | Firmicutes          | 38381  | 2215153 |
| Sample_SCB69.mb.74              | 59.70 | Bacteroidetes       | 15607  | 2776303 |
| Sample_SCB69.mb.95cbin.1        | 60.50 | Bacteroidetes       | 42963  | 2370484 |
| Sample_SCB69.mb.30              | 44.90 | Bacteroidales       | 85947  | 4730221 |
| Sample_SCB69.Cluster2719cbin.1  | 50.70 | Enterobacteriaceae  | 35661  | 4818307 |
| Sample_SCB69.mb.96              | 63.90 | Deltaproteobacteria | 14335  | 2427155 |
| Sample_SCB69.mb.41cbin.1        | 46.20 | Bacteroidales       | 114547 | 4182690 |
| Sample_SCB69.mb.39              | 41.70 | Bacteroidales       | 106527 | 4644753 |
| Sample_SCB70.Cluster16715       | 24.10 | Bacteria            | 80053  | 886856  |
| Sample_SCB70.Cluster16251       | 25.20 | Bacteria            | 69462  | 1349263 |
| Sample_SCB70.Cluster403cbin.1   | 54.70 | Clostridia          | 107000 | 2822266 |
| Sample_SCB70.Cluster14535       | 37.40 | Clostridiales       | 120535 | 2066480 |
| Sample_SCB70.mb.28              | 27.60 | Bacteria            | 50846  | 1084725 |
| Sample_SCB70.mb.12              | 53.20 | Clostridia          | 71837  | 1855402 |
| Sample_SCB70.Cluster394         | 61.50 | Clostridiales       | 59694  | 1659837 |
| Sample_SCB70.Cluster73cbin.1    | 59.10 | Clostridiales       | 51245  | 1819939 |
| Sample_SCB70.Cluster3672        | 52.40 | Clostridiales       | 99660  | 2414875 |
| Sample_SCB70.Cluster14944       | 33.50 | Bacteria            | 17390  | 2130456 |
| Sample_SCB70.Cluster16059cbin.1 | 31.30 | Euryarchaeota       | 121952 | 1492038 |
| Sample_SCB70.mb.114             | 51.50 | Clostridiales       | 7166   | 1746086 |
| Sample_SCB70.Cluster6337cbin.1  | 47.60 | Selenomonadales     | 89801  | 2126972 |
| Sample_SCB70.mb.54              | 60.20 | Clostridia          | 9914   | 2437237 |
| Sample_SCB70.Cluster8cbin.1     | 64.30 | Deltaproteobacteria | 5812   | 1958584 |
| Sample_SCB70.mb.74              | 53.70 | Clostridia          | 44099  | 1811409 |
| Sample_SCB70.Cluster4044        | 52.70 | Clostridiales       | 134393 | 2288492 |
| Sample_SCB70.mb.16              | 37.20 | Clostridiales       | 9880   | 2080064 |
| Sample_SCB70.mb.10              | 56.30 | Clostridiales       | 13926  | 2464203 |
| Sample_SCB70.mb.37              | 61.40 | Clostridiales       | 27360  | 2185938 |
| Sample_SCB70.Cluster8507cbin.1  | 44.10 | Clostridiales       | 115941 | 2362040 |
| Sample_SCB70.mb.112             | 43.50 | Lachnospiraceae     | 68208  | 3438924 |
| Sample_SCB70.mb.17cbin.1        | 36.40 | Clostridiales       | 17954  | 1747572 |
| Sample_SCB70.mb.14              | 44.50 | Lachnospiraceae     | 108139 | 2963905 |
| Sample_SCB70.mb.58              | 41.20 | Clostridiales       | 10470  | 3041987 |
| Sample_SCB70.mb.27cbin.1        | 41.80 | Clostridiales       | 134434 | 2415535 |
| Sample_SCB70.mb.52cbin.1        | 56.60 | Clostridiales       | 41551  | 2477008 |
| Sample_SCB70.mb.44              | 60.00 | Actinobacteria      | 17738  | 2038608 |
| Sample_SCB70.mb.63              | 51.60 | Bacteroidetes       | 52386  | 2983187 |
| Sample_SCB70.mb.77cbin.1        | 57.00 | Clostridiales       | 32427  | 2237398 |
| Sample_SCB70.mb.34cbin.1        | 38.60 | Clostridiales       | 115418 | 1983831 |
| Sample_SCB70.mb.29              | 41.70 | Lachnospiraceae     | 53304  | 2492919 |
| Sample_SCB70.mb.8               | 57.60 | Clostridiales       | 84622  | 2114625 |
| Sample_SCB70.mb.96              | 59.50 | Clostridiales       | 141206 | 2448011 |
| Sample_SCB70.mb.78cbin.1        | 52.80 | Bacteroidales       | 64998  | 2365579 |
| Sample_SCC55.mb.2               | 32.10 | Bacteria            | 371778 | 1929681 |
| Sample_SCC55.Cluster5346        | 42.00 | Clostridiales       | 31712  | 2604161 |
| Sample_SCC55.Cluster1346cbin.1  | 51.80 | Clostridiales       | 30887  | 2142192 |
| Sample_SCC55.Cluster2360        | 46.60 | Clostridiales       | 49492  | 1837420 |
| Sample_SCC55.mb.25              | 53.10 | Clostridiales       | 14609  | 2018315 |
| Sample_SCC55.Cluster2032cbin.1  | 51.50 | Bacteroidetes       | 100714 | 3385379 |
| Sample_SCC55.Cluster37          | 59.90 | Actinobacteria      | 38452  | 1892565 |
| Sample_SCC55.Cluster1341        | 51.40 | Bacteroidales       | 55122  | 2332558 |
| Sample_SCC55.Cluster4708cbin.1  | 45.00 | Clostridiales       | 102627 | 2705166 |

|                                 |       |                     |        |         |
|---------------------------------|-------|---------------------|--------|---------|
| Sample_SCC55.Cluster1689        | 52.10 | Firmicutes          | 49957  | 1925391 |
| Sample_SCC55.mb.72cbin.1        | 28.00 | Euryarchaeota       | 59661  | 1755249 |
| Sample_SCC55.mb.33cbin.1        | 36.60 | Clostridiales       | 7737   | 1595764 |
| Sample_SCC55.Cluster3849        | 43.50 | Lachnospiraceae     | 8503   | 1795565 |
| Sample_SCC55.Cluster7696cbin.1  | 37.80 | Lactobacillales     | 10618  | 1624360 |
| Sample_SCC55.mb.24cbin.1        | 59.00 | Clostridiales       | 16755  | 2254503 |
| Sample_SCC55.mb.19cbin.1        | 38.70 | Clostridiales       | 68197  | 2140189 |
| Sample_SCC55.Cluster435         | 58.20 | Veillonellaceae     | 335488 | 2486379 |
| Sample_SCC55.mb.28              | 41.90 | Clostridiales       | 118045 | 2437771 |
| Sample_SCC55.mb.75              | 33.70 | Bacteria            | 14696  | 2166807 |
| Sample_SCC55.mb.3cbin.1         | 44.00 | Lachnospiraceae     | 20530  | 2445077 |
| Sample_SCC55.mb.66              | 53.90 | Clostridiales       | 194712 | 1807381 |
| Sample_SCC55.mb.29              | 44.30 | Clostridiales       | 95449  | 2651362 |
| Sample_SCC55.Cluster7720cbin.1  | 41.30 | Lachnospiraceae     | 60855  | 3055665 |
| Sample_SCC55.mb.55              | 26.90 | Clostridiales       | 26671  | 2232570 |
| Sample_SCC55.mb.9               | 36.70 | Gammaproteobacteria | 87050  | 2151661 |
| Sample_SCC55.mb.41              | 28.50 | Clostridiales       | 68154  | 3218793 |
| Sample_SCC55.mb.71              | 35.80 | Clostridiales       | 95726  | 2589859 |
| Sample_SCC55.Cluster680cbin.1   | 56.00 | Enterobacteriaceae  | 277787 | 5219743 |
| Sample_SCC58.mb.103             | 27.40 | Bacteria            | 59542  | 931514  |
| Sample_SCC58.mb.108cbin.1       | 26.40 | Bacteria            | 89896  | 1539048 |
| Sample_SCC58.mb.31              | 24.00 | Bacteria            | 59798  | 959603  |
| Sample_SCC58.Cluster37cbin.1    | 61.50 | Clostridiales       | 13809  | 1819780 |
| Sample_SCC58.Cluster161         | 59.80 | Clostridiales       | 13597  | 1782010 |
| Sample_SCC58.Cluster4392        | 54.20 | Actinobacteria      | 170377 | 1619471 |
| Sample_SCC58.mb.17cbin.1        | 49.80 | Clostridiales       | 17572  | 1895313 |
| Sample_SCC58.mb.37cbin.1        | 53.80 | Clostridia          | 30427  | 1754205 |
| Sample_SCC58.mb.26cbin.1        | 58.50 | Clostridia          | 79334  | 2353649 |
| Sample_SCC58.Cluster13902cbin.1 | 34.10 | Bacilli             | 46338  | 2745172 |
| Sample_SCC58.mb.19              | 38.40 | Clostridiales       | 12091  | 2190396 |
| Sample_SCC58.mb.20              | 58.10 | Clostridiales       | 61576  | 3035836 |
| Sample_SCC58.mb.68              | 25.60 | Bacteria            | 37578  | 1155912 |
| Sample_SCC58.Cluster2946        | 54.80 | Bacteroidetes       | 149642 | 2036202 |
| Sample_SCC58.Cluster11902cbin.1 | 40.90 | Clostridiales       | 197398 | 1977503 |
| Sample_SCC58.mb.32cbin.1        | 57.80 | Clostridiales       | 28709  | 2520451 |
| Sample_SCC58.mb.83              | 26.30 | Bacteria            | 74335  | 1187207 |
| Sample_SCC58.mb.109             | 60.60 | Bacteroidetes       | 144992 | 2024653 |
| Sample_SCC58.mb.66              | 49.50 | Clostridiales       | 73977  | 1898861 |
| Sample_SCC58.mb.63              | 58.50 | Clostridia          | 12246  | 2899335 |
| Sample_SCC58.Cluster5765cbin.1  | 51.50 | Clostridiales       | 157337 | 2228294 |
| Sample_SCC58.mb.41cbin.1        | 48.60 | Clostridiales       | 13040  | 2735660 |
| Sample_SCC58.mb.74              | 60.70 | Actinobacteria      | 13743  | 1786456 |
| Sample_SCC58.Cluster849         | 55.70 | Bacteria            | 156029 | 2770254 |
| Sample_SCC58.mb.95cbin.1        | 49.10 | Clostridia          | 43084  | 1437069 |
| Sample_SCC58.mb.80              | 48.50 | Clostridiales       | 63664  | 1775123 |
| Sample_SCC58.mb.106             | 44.40 | Clostridiales       | 63453  | 2516818 |
| Sample_SCC58.mb.79cbin.1        | 59.50 | Clostridiales       | 46500  | 2366492 |
| Sample_SCC58.mb.72              | 61.80 | Clostridiales       | 16993  | 2449326 |
| Sample_SCC58.Cluster10136       | 43.30 | Bacteroidales       | 158704 | 3056788 |
| Sample_SCC58.mb.34              | 43.50 | Lachnospiraceae     | 71602  | 2850478 |
| Sample_SCC58.mb.71              | 60.50 | Clostridiales       | 53310  | 2348781 |
| Sample_SCC58.mb.87cbin.1        | 59.80 | Actinobacteria      | 29068  | 2130196 |
| Sample_SCC58.mb.78cbin.1        | 58.00 | Proteobacteria      | 8100   | 1914521 |
| Sample_SCC58.mb.90              | 56.40 | Clostridiales       | 14268  | 2462894 |
| Sample_SCC58.Cluster4938cbin.1  | 45.50 | Bacteroidales       | 16567  | 4161940 |
| Sample_SCC58.Cluster7703cbin.1  | 45.60 | Bacteroidales       | 50715  | 3968723 |
| Sample_SCC58.mb.93cbin.1        | 59.90 | Bifidobacteriaceae  | 125838 | 1940809 |



|                                 |       |                    |        |         |
|---------------------------------|-------|--------------------|--------|---------|
| Sample_SCC58.mb.101             | 41.70 | Bacteroidales      | 54911  | 4808549 |
| Sample_SCC58.Cluster176cbin.1   | 56.60 | Enterobacteriaceae | 9294   | 4053673 |
| Sample_SCC59.mb.27cbin.1        | 59.70 | Actinobacteria     | 5019   | 1349896 |
| Sample_SCC59.mb.36              | 59.60 | Clostridia         | 50794  | 2624182 |
| Sample_SCC59.Cluster7017cbin.1  | 44.90 | Actinobacteria     | 59380  | 1520952 |
| Sample_SCC59.mb.12cbin.1        | 36.90 | Clostridiales      | 21681  | 2814161 |
| Sample_SCC59.mb.84              | 27.10 | Bacteria           | 25453  | 3167295 |
| Sample_SCC59.mb.9               | 26.70 | Bacteria           | 126572 | 1314473 |
| Sample_SCC59.Cluster16cbin.1    | 59.20 | Clostridiales      | 10140  | 2147135 |
| Sample_SCC59.mb.70cbin.1        | 27.40 | Euryarchaeota      | 45746  | 1702406 |
| Sample_SCC59.Cluster8562        | 42.90 | Clostridiales      | 165614 | 1858094 |
| Sample_SCC59.mb.93              | 49.20 | Clostridiales      | 81920  | 2008241 |
| Sample_SCC59.mb.34              | 60.20 | Clostridiales      | 26315  | 1969418 |
| Sample_SCC59.Cluster3093cbin.1  | 51.70 | Clostridiales      | 199794 | 2339255 |
| Sample_SCC59.mb.48              | 58.80 | Bacteroidetes      | 64607  | 2427089 |
| Sample_SCC59.Cluster9725        | 40.50 | Clostridiales      | 255037 | 2191615 |
| Sample_SCC59.mb.24              | 31.20 | Euryarchaeota      | 116376 | 1723080 |
| Sample_SCC59.mb.47cbin.1        | 45.70 | Clostridiales      | 6309   | 2064546 |
| Sample_SCC59.mb.33              | 54.50 | Bacteroidetes      | 105154 | 2880680 |
| Sample_SCC59.mb.87              | 59.00 | Clostridiales      | 10265  | 2246193 |
| Sample_SCC59.mb.90              | 62.20 | Clostridiales      | 163568 | 1992682 |
| Sample_SCC59.Cluster6670cbin.1  | 43.20 | Bacteria           | 34398  | 3944941 |
| Sample_SCC59.mb.10              | 43.20 | Lachnospiraceae    | 49341  | 2911581 |
| Sample_SCC59.Cluster4295cbin.1  | 47.30 | Bacteroidales      | 28255  | 3889731 |
| Sample_SCC59.mb.71cbin.1        | 43.80 | Bacteria           | 39610  | 4344464 |
| Sample_SCC59.Cluster6696cbin.1  | 45.00 | Bacteroidales      | 28540  | 4654287 |
| Sample_SCC60.Cluster16100       | 24.10 | Bacteria           | 61208  | 978575  |
| Sample_SCC60.Cluster16043cbin.1 | 26.10 | Bacteria           | 20485  | 1145233 |
| Sample_SCC60.Cluster13861       | 29.40 | Bacteria           | 42112  | 1619639 |
| Sample_SCC60.mb.14              | 47.50 | Clostridiales      | 50982  | 1479445 |
| Sample_SCC60.mb.32              | 29.50 | Bacteria           | 28456  | 1493583 |
| Sample_SCC60.mb.12              | 50.00 | Clostridiales      | 7648   | 1847983 |
| Sample_SCC60.Cluster214cbin.1   | 60.20 | Actinobacteria     | 11659  | 1906009 |
| Sample_SCC60.mb.31              | 57.10 | Clostridiales      | 15435  | 2052326 |
| Sample_SCC60.mb.56              | 53.20 | Clostridia         | 25456  | 1971980 |
| Sample_SCC60.mb.10              | 56.90 | Clostridiales      | 15589  | 2364194 |
| Sample_SCC60.Cluster15816       | 31.10 | Euryarchaeota      | 176455 | 1783190 |
| Sample_SCC60.Cluster12433       | 40.60 | Clostridiales      | 125486 | 2075345 |
| Sample_SCC60.mb.24cbin.1        | 47.20 | Clostridiales      | 70625  | 2505181 |
| Sample_SCC60.mb.65              | 58.30 | Clostridiales      | 48984  | 2846214 |
| Sample_SCC60.mb.43              | 41.40 | Clostridiales      | 6755   | 2449201 |
| Sample_SCC60.Cluster11285cbin.1 | 39.50 | Clostridiales      | 98969  | 2187446 |
| Sample_SCC60.Cluster12028       | 41.70 | Clostridiales      | 127423 | 2472923 |
| Sample_SCC60.Cluster236         | 55.60 | Bacteria           | 165290 | 2688913 |
| Sample_SCC60.mb.57              | 59.60 | Clostridiales      | 7524   | 1792445 |
| Sample_SCC60.mb.28              | 49.70 | Bacteroidales      | 21419  | 2825226 |
| Sample_SCC60.mb.21              | 45.60 | Clostridiales      | 15110  | 1789366 |
| Sample_SCC60.mb.51              | 59.60 | Bacteria           | 51525  | 4061558 |
| Sample_SCC60.mb.35cbin.1        | 45.10 | Clostridiales      | 56228  | 1669468 |
| Sample_SCC60.mb.2               | 60.30 | Bacteroidetes      | 41702  | 2460178 |
| Sample_SCC60.mb.76              | 52.90 | Clostridiales      | 103103 | 2350774 |
| Sample_SCC60.mb.60              | 62.60 | Clostridiales      | 29536  | 1935457 |
| Sample_SCC60.mb.48cbin.1        | 57.50 | Clostridiales      | 34979  | 3289425 |
| Sample_SCC60.mb.45cbin.1        | 52.20 | Firmicutes         | 50312  | 2425342 |
| Sample_SCC60.mb.64cbin.1        | 56.40 | Clostridiales      | 15830  | 2394328 |
| Sample_SCC60.mb.84cbin.1        | 42.60 | Clostridiales      | 45708  | 3365535 |
| Sample_SCC60.Cluster9124cbin.1  | 43.40 | Bacteroidales      | 145074 | 2937227 |
| Sample_SCC60.mb.67              | 51.20 | Clostridiales      | 102509 | 2174118 |

|                                |       |                    |        |         |
|--------------------------------|-------|--------------------|--------|---------|
| Sample_SCC60.mb.87             | 45.20 | Clostridiales      | 80935  | 2381095 |
| Sample_SCC60.mb.99             | 36.40 | Clostridiales      | 153076 | 1967929 |
| Sample_SCC60.Cluster5145cbin.1 | 43.30 | Bacteria           | 28127  | 3924032 |
| Sample_SCC60.mb.13             | 41.90 | Clostridiales      | 33802  | 3268147 |
| Sample_SCC60.mb.9              | 57.30 | Bacteria           | 47671  | 2523753 |
| Sample_SCC60.mb.75cbin.1       | 43.20 | Lachnospiraceae    | 20379  | 2128385 |
| Sample_SCC60.mb.86cbin.1       | 54.40 | Bacteroidetes      | 106186 | 2152195 |
| Sample_SCC60.mb.81             | 36.00 | Clostridiales      | 40626  | 2349664 |
| Sample_SCC60.Cluster6558cbin.1 | 46.70 | Bacteroidales      | 47798  | 4201584 |
| Sample_SCC60.mb.93             | 41.50 | Lachnospiraceae    | 113870 | 2695583 |
| Sample_SCC61.mb.33             | 47.30 | Bacteria           | 46149  | 1754855 |
| Sample_SCC61.Cluster4039       | 41.80 | Clostridiales      | 83209  | 2676206 |
| Sample_SCC61.mb.94             | 41.00 | Bacteria           | 37365  | 3216241 |
| Sample_SCC61.mb.29cbin.1       | 37.10 | Clostridiales      | 42919  | 3076821 |
| Sample_SCC61.Cluster213cbin.1  | 59.30 | Bacteroidetes      | 8385   | 2102699 |
| Sample_SCC61.mb.79cbin.1       | 33.60 | Clostridiales      | 351073 | 2075784 |
| Sample_SCC61.mb.12cbin.1       | 60.00 | Clostridiales      | 8913   | 1914705 |
| Sample_SCC61.mb.42             | 49.60 | Clostridiales      | 14211  | 2257710 |
| Sample_SCC61.mb.53cbin.1       | 48.10 | Clostridiales      | 97885  | 2998385 |
| Sample_SCC61.Cluster175        | 59.90 | Bacteroidetes      | 235470 | 2686219 |
| Sample_SCC61.Cluster3441cbin.1 | 43.60 | Lachnospiraceae    | 22749  | 1882799 |
| Sample_SCC61.mb.13             | 60.90 | Clostridiales      | 25433  | 2086389 |
| Sample_SCC61.Cluster307cbin.1  | 55.30 | Bacteria           | 181025 | 2684675 |
| Sample_SCC61.Cluster4758cbin.1 | 40.90 | Clostridiales      | 178753 | 2022119 |
| Sample_SCC61.Cluster3659       | 44.00 | Clostridiales      | 275569 | 2743854 |
| Sample_SCC61.Cluster620        | 57.30 | Proteobacteria     | 109781 | 2349030 |
| Sample_SCC61.mb.32             | 44.20 | Clostridiales      | 47812  | 3299608 |
| Sample_SCC61.mb.68             | 42.40 | Clostridiales      | 55200  | 2389323 |
| Sample_SCC61.mb.69cbin.1       | 46.60 | Lachnospiraceae    | 85036  | 2914910 |
| Sample_SCC61.mb.23cbin.1       | 57.80 | Clostridiales      | 26763  | 2092551 |
| Sample_SCC61.mb.78cbin.1       | 38.20 | Clostridiales      | 52428  | 1876355 |
| Sample_SCC61.mb.92cbin.1       | 59.90 | Clostridiales      | 8990   | 2118655 |
| Sample_SCC61.Cluster6030cbin.1 | 37.20 | Clostridiales      | 119792 | 3004474 |
| Sample_SCC61.Cluster4061cbin.1 | 41.60 | Lachnospiraceae    | 39011  | 3650243 |
| Sample_SCC61.Cluster3270cbin.1 | 43.30 | Bacteria           | 13745  | 3728446 |
| Sample_SCC61.mb.85cbin.1       | 26.90 | Clostridiales      | 22775  | 2934716 |
| Sample_SCC61.mb.41cbin.1       | 41.30 | Bacteroidales      | 35684  | 4249544 |
| Sample_SCC61.Cluster2650cbin.1 | 45.70 | Bacteroidales      | 40911  | 3948441 |
| Sample_SCC61.Cluster3036cbin.1 | 45.00 | Bacteroidales      | 159855 | 4519323 |
| Sample_SCC61.Cluster1752       | 50.70 | Enterobacteriaceae | 58387  | 4632836 |
| Sample_SCC64.mb.26             | 49.50 | Clostridiales      | 78074  | 1923290 |
| Sample_SCC64.mb.22             | 58.30 | Clostridiales      | 63603  | 2805537 |
| Sample_SCC64.Cluster3622cbin.1 | 44.90 | Clostridiales      | 66587  | 2575703 |
| Sample_SCC64.mb.52cbin.1       | 62.20 | Clostridiales      | 7320   | 1467173 |
| Sample_SCC64.mb.25             | 61.40 | Clostridiales      | 10550  | 2459091 |
| Sample_SCC64.Cluster662cbin.1  | 52.60 | Firmicutes         | 6799   | 1971881 |
| Sample_SCC64.Cluster61cbin.1   | 59.40 | Clostridiales      | 37241  | 2328675 |
| Sample_SCC64.Cluster5107       | 40.90 | Clostridiales      | 116065 | 2005020 |
| Sample_SCC64.Cluster7354cbin.1 | 29.70 | Bacteria           | 32266  | 2339524 |
| Sample_SCC64.Cluster276cbin.1  | 56.40 | Bifidobacteriaceae | 52632  | 1818498 |
| Sample_SCC64.mb.13cbin.1       | 60.10 | Bacteroidetes      | 50621  | 2510444 |
| Sample_SCC64.mb.11             | 60.00 | Bifidobacteriaceae | 104533 | 2167920 |
| Sample_SCC64.Cluster820        | 55.50 | Proteobacteria     | 161475 | 2276536 |
| Sample_SCC64.Cluster6936cbin.1 | 35.80 | Clostridiales      | 172146 | 2530932 |
| Sample_SCC64.mb.63             | 44.90 | Clostridiales      | 28354  | 2288763 |
| Sample_SCC64.mb.18             | 41.80 | Lachnospiraceae    | 50018  | 2590505 |
| Sample_SCC64.mb.79             | 54.50 | Bacteroidetes      | 103756 | 2228725 |
| Sample_SCC64.mb.67             | 46.40 | Lachnospiraceae    | 68771  | 3563060 |

|                                |       |                 |        |         |
|--------------------------------|-------|-----------------|--------|---------|
| Sample_SCC64.Cluster2663       | 47.90 | Bacteroidales   | 100998 | 2789200 |
| Sample_SCC64.Cluster7245       | 31.40 | Firmicutes      | 50122  | 2319226 |
| Sample_SCC64.mb.43cbin.1       | 57.60 | Clostridiales   | 51322  | 2583381 |
| Sample_SCC64.mb.54             | 37.20 | Clostridiales   | 124635 | 2872449 |
| Sample_SCC64.mb.45             | 49.00 | Proteobacteria  | 12540  | 2302564 |
| Sample_SCC64.mb.24             | 40.60 | Bacteroidales   | 55292  | 3255452 |
| Sample_SCC64.mb.38             | 43.40 | Bacteroidales   | 162755 | 3093087 |
| Sample_SCC64.mb.47cbin.1       | 41.10 | Lachnospiraceae | 54946  | 3626557 |
| Sample_SCC64.Cluster2242       | 45.40 | Bacteroidales   | 112893 | 4075472 |
| Sample_SCC64.Cluster3650cbin.1 | 42.80 | Bacteria        | 54465  | 4488505 |
| Sample_SCC64.Cluster3045       | 45.00 | Bacteroidales   | 180035 | 4537407 |
| Sample_SCC64.mb.46cbin.1       | 46.90 | Bacteroidales   | 42003  | 4031528 |
| Sample_SCC64.mb.29             | 41.70 | Bacteroidales   | 166563 | 4641649 |
| Sample_SCC65.Cluster2480cbin.1 | 49.40 | Bacteria        | 62766  | 1773897 |
| Sample_SCC65.mb.51cbin.1       | 40.60 | Bacteria        | 186583 | 2746275 |
| Sample_SCC65.Cluster781cbin.1  | 55.70 | Clostridiales   | 6642   | 1971094 |
| Sample_SCC65.mb.22             | 38.20 | Clostridiales   | 58819  | 2664900 |
| Sample_SCC65.mb.32             | 54.30 | Actinobacteria  | 31356  | 1575196 |
| Sample_SCC65.Cluster2641       | 48.20 | Clostridiales   | 106481 | 2901453 |
| Sample_SCC65.mb.7cbin.1        | 42.40 | Clostridiales   | 9333   | 2309936 |
| Sample_SCC65.Cluster5070       | 40.50 | Lachnospiraceae | 134433 | 2748924 |
| Sample_SCC65.mb.69cbin.1       | 61.90 | Clostridiales   | 7879   | 2229830 |
| Sample_SCC65.Cluster520        | 55.00 | Bacteroidetes   | 122773 | 1966468 |
| Sample_SCC65.mb.2              | 56.00 | Bacteria        | 6422   | 2158663 |
| Sample_SCC65.Cluster5719       | 38.70 | Clostridiales   | 100215 | 2048021 |
| Sample_SCC65.mb.70cbin.1       | 51.50 | Clostridiales   | 131036 | 2607252 |
| Sample_SCC65.mb.58cbin.1       | 37.20 | Clostridiales   | 7200   | 2201356 |
| Sample_SCC65.Cluster13cbin.1   | 63.30 | Actinobacteria  | 57276  | 2901411 |
| Sample_SCC65.mb.33cbin.1       | 41.30 | Clostridiales   | 189426 | 2611112 |
| Sample_SCC65.Cluster6213cbin.1 | 37.30 | Clostridiales   | 97019  | 2782195 |
| Sample_SCC65.mb.45             | 44.90 | Clostridiales   | 104966 | 2702787 |
| Sample_SCC65.mb.77cbin.1       | 59.30 | Bacteroidetes   | 32195  | 2911331 |
| Sample_SCC65.mb.28             | 48.40 | Proteobacteria  | 28861  | 2613848 |
| Sample_SCC65.mb.53cbin.1       | 42.20 | Bacteria        | 6333   | 3631288 |
| Sample_SCC65.mb.42cbin.1       | 42.10 | Bacteroidales   | 45184  | 4073938 |
| Sample_SCC65.Cluster3329cbin.1 | 46.50 | Bacteroidales   | 141755 | 4431026 |
| Sample_SCC65.mb.16             | 45.20 | Bacteroidales   | 46924  | 4555689 |
| Sample_SCC65.mb.52             | 43.50 | Bacteroidales   | 169644 | 5892455 |
| Sample_SCC66.Cluster3790       | 49.40 | Clostridia      | 107272 | 1834397 |
| Sample_SCC66.Cluster1441cbin.1 | 58.20 | Clostridiales   | 50519  | 3017756 |
| Sample_SCC66.mb.15             | 26.00 | Bacteria        | 89979  | 1352507 |
| Sample_SCC66.Cluster294cbin.1  | 58.40 | Clostridiales   | 39272  | 2767071 |
| Sample_SCC66.Cluster2799cbin.1 | 44.00 | Selenomonadales | 9467   | 1882874 |
| Sample_SCC66.Cluster8cbin.1    | 62.30 | Clostridiales   | 11332  | 2239094 |
| Sample_SCC66.mb.118            | 36.40 | Clostridiales   | 68418  | 1881212 |
| Sample_SCC66.Cluster6670cbin.1 | 47.00 | Lachnospiraceae | 19523  | 3036224 |
| Sample_SCC66.mb.6cbin.1        | 53.40 | Clostridia      | 9481   | 1735970 |
| Sample_SCC66.Cluster438        | 55.60 | Bacteria        | 204838 | 2714050 |
| Sample_SCC66.Cluster8261cbin.1 | 40.50 | Clostridiales   | 278999 | 2193314 |
| Sample_SCC66.mb.57cbin.1       | 54.80 | Actinobacteria  | 7477   | 1325155 |
| Sample_SCC66.Cluster8780       | 37.70 | Clostridiales   | 32432  | 2348914 |
| Sample_SCC66.mb.33             | 54.80 | Bacteroidetes   | 123344 | 1995773 |
| Sample_SCC66.mb.54             | 46.70 | Lactobacillales | 87969  | 1986295 |
| Sample_SCC66.Cluster5669cbin.1 | 44.10 | Bacteroidales   | 10132  | 2912860 |
| Sample_SCC66.Cluster1357       | 55.40 | Proteobacteria  | 114695 | 2698231 |
| Sample_SCC66.Cluster1223cbin.1 | 59.00 | Bacteroidetes   | 186027 | 3173294 |
| Sample_SCC66.mb.32cbin.1       | 55.90 | Clostridiales   | 12734  | 2534760 |
| Sample_SCC66.mb.90cbin.1       | 59.10 | Clostridiales   | 21419  | 1932843 |

|                                 |       |                    |        |         |
|---------------------------------|-------|--------------------|--------|---------|
| Sample_SCC66.mb.114cbin.1       | 44.10 | Clostridiales      | 52191  | 2816621 |
| Sample_SCC66.mb.87              | 48.10 | Clostridiales      | 34593  | 2883518 |
| Sample_SCC66.mb.109cbin.1       | 42.50 | Clostridiales      | 118919 | 2927059 |
| Sample_SCC66.mb.107cbin.1       | 44.70 | Clostridiales      | 26541  | 3000534 |
| Sample_SCC66.Cluster5209        | 43.20 | Bacteria           | 48129  | 3991226 |
| Sample_SCC66.mb.100             | 42.10 | Bacteroidales      | 48504  | 3468933 |
| Sample_SCC66.mb.97cbin.1        | 52.20 | Clostridiales      | 149240 | 2359627 |
| Sample_SCC66.mb.27              | 58.50 | Bifidobacteriaceae | 137344 | 2327626 |
| Sample_SCC66.mb.2cbin.1         | 40.90 | Lachnospiraceae    | 42780  | 3145928 |
| Sample_SCC66.mb.88cbin.1        | 44.20 | Clostridiales      | 149608 | 2091988 |
| Sample_SCC66.Cluster4739cbin.1  | 45.00 | Bacteroidales      | 134771 | 4376084 |
| Sample_SCC66.mb.82cbin.1        | 60.00 | Bifidobacteriaceae | 39133  | 2640794 |
| Sample_SCC66.mb.86              | 59.40 | Bacteroidetes      | 47569  | 2588001 |
| Sample_SCC66.mb.7               | 43.70 | Bacteroidales      | 337152 | 3290009 |
| Sample_SCC67.Cluster4189cbin.1  | 53.20 | Clostridiales      | 25865  | 1930671 |
| Sample_SCC67.mb.12              | 26.10 | Bacteria           | 56681  | 1375372 |
| Sample_SCC67.Cluster3149cbin.1  | 52.00 | Clostridiales      | 22577  | 1989646 |
| Sample_SCC67.Cluster11226cbin.1 | 44.90 | Clostridiales      | 84186  | 2536649 |
| Sample_SCC67.mb.14              | 36.30 | Clostridiales      | 203773 | 1914967 |
| Sample_SCC67.mb.114             | 56.10 | Clostridiales      | 18682  | 2215265 |
| Sample_SCC67.mb.126             | 58.40 | Clostridiales      | 35538  | 1944605 |
| Sample_SCC67.mb.69              | 49.60 | Clostridia         | 6381   | 1612232 |
| Sample_SCC67.mb.28              | 61.10 | Clostridiales      | 32817  | 1733454 |
| Sample_SCC67.Cluster15193cbin.1 | 41.80 | Clostridiales      | 178729 | 2435220 |
| Sample_SCC67.Cluster11439       | 44.50 | Clostridiales      | 329789 | 2134847 |
| Sample_SCC67.mb.55cbin.1        | 49.30 | Bacteria           | 10294  | 1736955 |
| Sample_SCC67.Cluster15443       | 38.70 | Clostridiales      | 78024  | 2165164 |
| Sample_SCC67.mb.105cbin.1       | 51.10 | Bacteroidales      | 52430  | 2573801 |
| Sample_SCC67.Cluster8360cbin.1  | 52.50 | Bacteroidales      | 67480  | 2741928 |
| Sample_SCC67.Cluster45cbin.1    | 60.90 | Bacteroidetes      | 10298  | 2511364 |
| Sample_SCC67.mb.35              | 56.40 | Clostridiales      | 68344  | 2280582 |
| Sample_SCC67.Cluster8834cbin.1  | 44.90 | Prevotella         | 17536  | 3201554 |
| Sample_SCC67.mb.26cbin.1        | 55.90 | Bacteroidetes      | 6569   | 2173996 |
| Sample_SCC67.Cluster15804cbin.1 | 38.60 | Streptococcus      | 30129  | 2026902 |
| Sample_SCC67.Cluster11250       | 41.70 | Lachnospiraceae    | 6178   | 2605401 |
| Sample_SCC67.mb.18              | 56.40 | Clostridiales      | 14053  | 2317352 |
| Sample_SCC67.mb.5cbin.1         | 61.30 | Clostridiales      | 56510  | 2078145 |
| Sample_SCC67.mb.62              | 58.50 | Clostridiales      | 6400   | 1855581 |
| Sample_SCC67.mb.101cbin.1       | 43.00 | Clostridiales      | 213310 | 2854274 |
| Sample_SCC67.Cluster12373cbin.1 | 41.10 | Lachnospiraceae    | 53048  | 3094945 |
| Sample_SCC67.mb.2               | 43.10 | Lachnospiraceae    | 33150  | 2119243 |
| Sample_SCC67.mb.45              | 53.90 | Clostridiales      | 10893  | 1884223 |
| Sample_SCC67.mb.75              | 57.20 | Clostridiales      | 105583 | 2340995 |
| Sample_SCC67.mb.52cbin.1        | 51.80 | Clostridiales      | 16190  | 1940214 |
| Sample_SCC67.mb.103             | 59.20 | Clostridiales      | 24207  | 3524372 |
| Sample_SCC67.mb.73cbin.1        | 57.20 | Clostridiales      | 17551  | 2351661 |
| Sample_SCC67.mb.97cbin.1        | 62.00 | Clostridiales      | 41201  | 2031303 |
| Sample_SCC67.mb.131             | 43.40 | Bacteroidales      | 82485  | 3201282 |
| Sample_SCC67.mb.90cbin.1        | 47.80 | Bacteroidales      | 16634  | 2940190 |
| Sample_SCC67.mb.63              | 42.20 | Lachnospiraceae    | 6175   | 1937881 |
| Sample_SCC67.mb.95cbin.1        | 54.30 | Bacteroidetes      | 110446 | 2269693 |
| Sample_SCC67.mb.77cbin.1        | 43.80 | Lachnospiraceae    | 24006  | 2775139 |
| Sample_SCC67.mb.74cbin.1        | 42.60 | Clostridiales      | 71737  | 2621763 |
| Sample_SCC68.mb.39              | 53.20 | Clostridia         | 8972   | 1862779 |
| Sample_SCC68.mb.17              | 53.50 | Clostridiales      | 36368  | 1753906 |
| Sample_SCC68.Cluster3923        | 49.50 | Clostridiales      | 101610 | 1997849 |
| Sample_SCC68.mb.58              | 26.40 | Bacteria           | 124727 | 1242084 |
| Sample_SCC68.mb.23cbin.1        | 48.80 | Clostridiales      | 7849   | 1472108 |

|                                |       |                    |        |         |
|--------------------------------|-------|--------------------|--------|---------|
| Sample_SCC68.mb.22cbin.1       | 58.60 | Clostridiales      | 5366   | 2405802 |
| Sample_SCC68.Cluster829cbin.1  | 59.20 | Clostridiales      | 70746  | 2288181 |
| Sample_SCC68.mb.38             | 58.20 | Clostridiales      | 24801  | 2112158 |
| Sample_SCC68.Cluster193cbin.1  | 57.00 | Clostridiales      | 53287  | 1982061 |
| Sample_SCC68.mb.33             | 57.70 | Clostridiales      | 8694   | 2062348 |
| Sample_SCC68.mb.18             | 52.80 | Clostridiales      | 30585  | 2202779 |
| Sample_SCC68.Cluster4067cbin.1 | 47.40 | Lactobacillales    | 23354  | 1734091 |
| Sample_SCC68.mb.41             | 54.50 | Clostridiales      | 40092  | 2101823 |
| Sample_SCC68.mb.61             | 60.30 | Clostridiales      | 73656  | 1881337 |
| Sample_SCC68.mb.72cbin.1       | 29.60 | Bacteria           | 51997  | 1667013 |
| Sample_SCC68.Cluster6989cbin.1 | 42.20 | Clostridiales      | 5363   | 1765977 |
| Sample_SCC68.mb.45cbin.1       | 59.80 | Clostridiales      | 22668  | 2380055 |
| Sample_SCC68.mb.50             | 60.70 | Bacteria           | 105495 | 4738247 |
| Sample_SCC68.mb.19cbin.1       | 59.80 | Bacteroidetes      | 101361 | 2576495 |
| Sample_SCC68.mb.28cbin.1       | 51.10 | Firmicutes         | 37819  | 2136692 |
| Sample_SCC68.mb.35             | 39.00 | Clostridiales      | 17119  | 1959920 |
| Sample_SCC68.Cluster9019cbin.1 | 37.70 | Clostridiales      | 5244   | 2151750 |
| Sample_SCC68.mb.68cbin.1       | 59.80 | Clostridiales      | 71954  | 2060943 |
| Sample_SCC68.mb.1              | 44.40 | Clostridiales      | 142843 | 2285841 |
| Sample_SCC68.mb.44cbin.1       | 51.50 | Clostridiales      | 117357 | 2156080 |
| Sample_SCC68.Cluster9947cbin.1 | 38.00 | Lactobacillus      | 113554 | 1855726 |
| Sample_SCC68.mb.59cbin.1       | 55.20 | Clostridiales      | 68120  | 3608615 |
| Sample_SCC68.mb.66             | 53.90 | Clostridiales      | 49608  | 1866355 |
| Sample_SCC68.mb.60             | 58.90 | Bacteroidetes      | 86340  | 2902571 |
| Sample_SCC68.mb.20             | 40.70 | Lachnospiraceae    | 82888  | 3273680 |
| Sample_SCC68.mb.10             | 46.80 | Bacteroidales      | 83853  | 4013310 |
| Sample_SCC68.mb.49             | 42.00 | Bacteroidales      | 41653  | 4330874 |
| Sample_SCC68.mb.24cbin.1       | 50.80 | Enterobacteriaceae | 25607  | 4474331 |
| Sample_SCC69.mb.31             | 52.90 | Clostridia         | 68512  | 2092306 |
| Sample_SCC69.mb.56cbin.1       | 53.70 | Clostridia         | 18162  | 1684712 |
| Sample_SCC69.mb.37             | 58.30 | Clostridiales      | 56069  | 3002733 |
| Sample_SCC69.Cluster248cbin.1  | 59.80 | Clostridiales      | 102074 | 1925109 |
| Sample_SCC69.Cluster2319cbin.1 | 62.50 | Clostridiales      | 90962  | 1872647 |
| Sample_SCC69.mb.28cbin.1       | 62.30 | Actinobacteria     | 164804 | 2280410 |
| Sample_SCC69.mb.15cbin.1       | 41.60 | Clostridiales      | 12308  | 3630009 |
| Sample_SCC69.mb.29             | 61.50 | Clostridiales      | 81947  | 2147830 |
| Sample_SCC69.Cluster3524cbin.1 | 51.50 | Clostridiales      | 119488 | 2551619 |
| Sample_SCC69.mb.34cbin.1       | 59.50 | Clostridiales      | 4977   | 1815383 |
| Sample_SCC69.mb.57             | 53.50 | Actinobacteria     | 57957  | 1601083 |
| Sample_SCC69.mb.30cbin.1       | 56.10 | Clostridiales      | 95076  | 2486743 |
| Sample_SCC69.mb.32             | 58.10 | Clostridiales      | 10354  | 2352745 |
| Sample_SCC69.mb.22cbin.1       | 59.90 | Actinobacteria     | 37673  | 2266242 |
| Sample_SCC69.Cluster3324cbin.1 | 51.10 | Firmicutes         | 37226  | 2246799 |
| Sample_SCC69.Cluster10971      | 30.90 | Euryarchaeota      | 93703  | 1788042 |
| Sample_SCC69.Cluster10644      | 32.60 | Lactobacillales    | 7263   | 1655406 |
| Sample_SCC69.mb.67             | 49.60 | Clostridiales      | 114414 | 1918279 |
| Sample_SCC69.Cluster525cbin.1  | 59.70 | Bifidobacteriaceae | 111761 | 1900553 |
| Sample_SCC69.Cluster1876       | 56.30 | Selenomonadales    | 109439 | 2170438 |
| Sample_SCC69.mb.25cbin.1       | 58.50 | Bacteria           | 15845  | 2797401 |
| Sample_SCC69.mb.62             | 57.30 | Clostridiales      | 69387  | 1878182 |
| Sample_SCC69.mb.46cbin.1       | 50.70 | Lactobacillales    | 7369   | 1648042 |
| Sample_SCC69.Cluster9042cbin.1 | 41.90 | Lachnospiraceae    | 49824  | 2645354 |
| Sample_SCC69.mb.35             | 60.10 | Bifidobacteriaceae | 30215  | 2206372 |
| Sample_SCC69.mb.68cbin.1       | 57.30 | Clostridiales      | 132753 | 1839892 |
| Sample_SCC69.mb.55             | 62.80 | Bifidobacteriaceae | 123014 | 1994249 |
| Sample_SCC69.Cluster6823cbin.1 | 44.60 | Prevotella         | 61905  | 3709519 |
| Sample_SCC69.mb.21             | 43.50 | Bacteroidales      | 137044 | 3156269 |
| Sample_SCC69.Cluster5299cbin.1 | 43.40 | Bacteria           | 8953   | 3577489 |

|                                 |       |                     |        |         |
|---------------------------------|-------|---------------------|--------|---------|
| Sample_SCC69.mb.58cbin.1        | 58.50 | Clostridiales       | 58152  | 2551893 |
| Sample_SCC69.mb.70cbin.1        | 51.60 | Clostridiales       | 157225 | 2063079 |
| Sample_SCC69.mb.52cbin.1        | 41.20 | Lachnospiraceae     | 20109  | 3141173 |
| Sample_SCC69.mb.60              | 41.80 | Clostridiales       | 84225  | 3266613 |
| Sample_SCC69.mb.9               | 55.20 | Bacteroidetes       | 38803  | 2110662 |
| Sample_SCC69.mb.75              | 44.50 | Clostridiales       | 151633 | 2623332 |
| Sample_SCC69.mb.83              | 43.20 | Clostridiales       | 9809   | 2367932 |
| Sample_SCC69.mb.69              | 43.60 | Lachnospiraceae     | 24215  | 2520026 |
| Sample_SCC69.mb.43cbin.1        | 42.00 | Bacteroides         | 67119  | 4509918 |
| Sample_SCC69.mb.72cbin.1        | 46.30 | Bacteroidales       | 134245 | 4127606 |
| Sample_SCC69.mb.81cbin.1        | 41.90 | Bacteroidales       | 91509  | 4594420 |
| Sample_SCC69.Cluster668cbin.1   | 57.10 | Enterobacteriaceae  | 55643  | 5125082 |
| Sample_SCC69.mb.7cbin.1         | 50.60 | Enterobacteriaceae  | 29637  | 5191722 |
| Sample_SCC70.mb.18              | 24.10 | Bacteria            | 80062  | 955148  |
| Sample_SCC70.Cluster7894        | 47.40 | Clostridiales       | 495522 | 1560132 |
| Sample_SCC70.mb.33              | 25.20 | Bacteria            | 71846  | 1308088 |
| Sample_SCC70.Cluster12265cbin.1 | 37.60 | Clostridiales       | 192994 | 2412853 |
| Sample_SCC70.mb.26              | 52.80 | Clostridia          | 55404  | 2030941 |
| Sample_SCC70.Cluster1298cbin.1  | 57.00 | Clostridiales       | 43218  | 2295128 |
| Sample_SCC70.mb.49              | 44.80 | Bacteria            | 247093 | 1561856 |
| Sample_SCC70.Cluster4194cbin.1  | 49.30 | Bacteroidales       | 6973   | 2654828 |
| Sample_SCC70.mb.60              | 27.70 | Bacteria            | 53578  | 1128595 |
| Sample_SCC70.mb.15cbin.1        | 59.20 | Clostridiales       | 31905  | 1814297 |
| Sample_SCC70.mb.110cbin.1       | 58.00 | Clostridiales       | 37480  | 2094257 |
| Sample_SCC70.Cluster6984        | 47.50 | Lachnospiraceae     | 48642  | 2519287 |
| Sample_SCC70.Cluster6586        | 47.60 | Selenomonadales     | 89802  | 2125775 |
| Sample_SCC70.mb.28              | 51.40 | Bacteroidetes       | 49396  | 3140576 |
| Sample_SCC70.Cluster12184       | 38.70 | Clostridiales       | 80706  | 1972328 |
| Sample_SCC70.mb.69cbin.1        | 49.50 | Bacteria            | 8222   | 1604931 |
| Sample_SCC70.mb.48              | 54.00 | Clostridiales       | 12063  | 1619260 |
| Sample_SCC70.Cluster8175cbin.1  | 49.20 | Bacteroidales       | 44462  | 3067605 |
| Sample_SCC70.mb.16              | 47.20 | Clostridiales       | 77435  | 2562539 |
| Sample_SCC70.mb.58              | 58.40 | Clostridiales       | 18375  | 2853548 |
| Sample_SCC70.Cluster4154        | 52.80 | Clostridiales       | 122087 | 2267011 |
| Sample_SCC70.Cluster9642cbin.1  | 41.90 | Clostridiales       | 101602 | 2358046 |
| Sample_SCC70.mb.105             | 31.20 | Euryarchaeota       | 102764 | 1760231 |
| Sample_SCC70.Cluster12153cbin.1 | 44.00 | Clostridiales       | 116535 | 2409555 |
| Sample_SCC70.mb.34              | 44.80 | Rhodospirillales    | 55672  | 2039767 |
| Sample_SCC70.mb.20cbin.1        | 43.90 | Lachnospiraceae     | 105701 | 3077349 |
| Sample_SCC70.Cluster6180        | 45.30 | Clostridiales       | 21073  | 2807159 |
| Sample_SCC70.Cluster11577cbin.1 | 41.40 | Lachnospiraceae     | 30849  | 2771901 |
| Sample_SCC70.mb.78cbin.1        | 36.40 | Clostridiales       | 155214 | 1857047 |
| Sample_SCC70.mb.91cbin.1        | 42.80 | Clostridia          | 6207   | 1166021 |
| Sample_SCC70.mb.102             | 42.40 | Clostridiales       | 24346  | 2677249 |
| Sample_SCC70.Cluster6980cbin.1  | 45.10 | Prevotella          | 30476  | 3696268 |
| Sample_SCC70.mb.50              | 56.60 | Clostridiales       | 8924   | 2312550 |
| Sample_SCC70.mb.71              | 57.80 | Clostridiales       | 33958  | 1919995 |
| Sample_SCC70.mb.109cbin.1       | 50.10 | Bacteroidales       | 56867  | 2460378 |
| Sample_SCC70.mb.52cbin.1        | 64.30 | Deltaproteobacteria | 5477   | 1877637 |
| Sample_SCC70.mb.77              | 59.20 | Clostridiales       | 12342  | 1763038 |
| Sample_SCC70.mb.85              | 55.20 | Clostridia          | 40386  | 2540644 |
| Sample_SCC70.mb.40              | 50.40 | Bacteroidales       | 7438   | 2131338 |
| Sample_SCC70.mb.97              | 57.20 | Clostridiales       | 47881  | 2418020 |
| Sample_SCC70.mb.76cbin.1        | 52.80 | Bacteroidales       | 64999  | 2429576 |
| Sample_SCC70.mb.81              | 43.60 | Lachnospiraceae     | 57817  | 3477129 |
| Sample_SCC70.mb.93cbin.1        | 51.30 | Clostridiales       | 82625  | 3044952 |
| Sample_SCC70.mb.88              | 40.90 | Clostridiales       | 229767 | 2355826 |
| Sample_SCC70.mb.92              | 46.40 | Prevotella          | 35253  | 2902092 |

|                                 |       |                    |        |         |
|---------------------------------|-------|--------------------|--------|---------|
| Sample_SPA03.Cluster14037cbin.1 | 25.90 | Bacteria           | 136763 | 1279079 |
| Sample_SPA03.Cluster11746cbin.1 | 37.40 | Clostridiales      | 255743 | 2168871 |
| Sample_SPA03.mb.22              | 26.90 | Bacteria           | 60429  | 1268246 |
| Sample_SPA03.Cluster260cbin.1   | 60.80 | Clostridiales      | 48646  | 1890545 |
| Sample_SPA03.Cluster4871cbin.1  | 48.40 | Clostridiales      | 142161 | 2669750 |
| Sample_SPA03.mb.116             | 38.30 | Clostridiales      | 27527  | 2387534 |
| Sample_SPA03.mb.39              | 51.10 | Bacteria           | 58713  | 1874357 |
| Sample_SPA03.Cluster8013cbin.1  | 42.40 | Clostridiales      | 50215  | 3604876 |
| Sample_SPA03.Cluster1587        | 55.00 | Bacteroidetes      | 87851  | 1940411 |
| Sample_SPA03.mb.23cbin.1        | 57.90 | Clostridiales      | 46640  | 3211972 |
| Sample_SPA03.Cluster3083cbin.1  | 48.70 | Firmicutes         | 18240  | 1881424 |
| Sample_SPA03.mb.18              | 56.60 | Clostridiales      | 24276  | 2535398 |
| Sample_SPA03.Cluster3223cbin.1  | 48.90 | Bacteroidales      | 116443 | 2986403 |
| Sample_SPA03.Cluster35          | 65.20 | Proteobacteria     | 38533  | 2398288 |
| Sample_SPA03.mb.35              | 53.60 | Clostridiales      | 18711  | 2448118 |
| Sample_SPA03.Cluster8475cbin.1  | 43.00 | Clostridiales      | 173059 | 2879040 |
| Sample_SPA03.mb.118             | 53.50 | Clostridiales      | 26182  | 2143326 |
| Sample_SPA03.mb.119cbin.1       | 59.20 | Bacteroidetes      | 107543 | 3036303 |
| Sample_SPA03.mb.24              | 58.90 | Clostridiales      | 18912  | 2379244 |
| Sample_SPA03.mb.2               | 33.70 | Clostridiales      | 21645  | 1999791 |
| Sample_SPA03.mb.38              | 46.90 | Lachnospiraceae    | 13164  | 2640034 |
| Sample_SPA03.Cluster453cbin.1   | 56.00 | Proteobacteria     | 8275   | 2465102 |
| Sample_SPA03.mb.66cbin.1        | 41.90 | Clostridiales      | 30701  | 2268864 |
| Sample_SPA03.mb.11              | 59.10 | Bacteroidetes      | 186665 | 2715641 |
| Sample_SPA03.mb.50cbin.1        | 58.50 | Clostridiales      | 20611  | 2529864 |
| Sample_SPA03.mb.19              | 44.20 | Clostridiales      | 157392 | 2763804 |
| Sample_SPA03.Cluster6910cbin.1  | 43.40 | Bacteroidales      | 421458 | 3149661 |
| Sample_SPA03.mb.62cbin.1        | 41.40 | Lachnospiraceae    | 73242  | 2215652 |
| Sample_SPA03.mb.27              | 37.40 | Clostridiales      | 51469  | 2648781 |
| Sample_SPA03.Cluster6052cbin.1  | 43.30 | Bacteria           | 24591  | 3897944 |
| Sample_SPA03.mb.93              | 41.10 | Clostridiales      | 33190  | 2596756 |
| Sample_SPA03.mb.51cbin.1        | 56.20 | Clostridiales      | 13391  | 2496120 |
| Sample_SPA03.mb.54              | 60.50 | Clostridiales      | 40266  | 2388302 |
| Sample_SPA03.mb.69              | 45.50 | Lachnospiraceae    | 29649  | 2376933 |
| Sample_SPA03.mb.92cbin.1        | 44.90 | Clostridiales      | 107523 | 2627269 |
| Sample_SPA03.mb.7               | 52.80 | Clostridiales      | 493272 | 2009618 |
| Sample_SPA03.Cluster6964cbin.1  | 46.10 | Bacteroidales      | 72826  | 3784325 |
| Sample_SPA03.Cluster5354        | 45.30 | Bacteroidales      | 79640  | 4312955 |
| Sample_SPA03.mb.64              | 40.70 | Clostridiales      | 6223   | 2444192 |
| Sample_SPA03.mb.77              | 59.70 | Bacteroidetes      | 137703 | 2579460 |
| Sample_SPA03.Cluster5960        | 44.90 | Bacteroidales      | 96387  | 4581501 |
| Sample_SPA03.mb.98              | 35.80 | Clostridiales      | 46011  | 2551675 |
| Sample_SPA03.mb.90              | 49.90 | Lachnospiraceae    | 75440  | 2817590 |
| Sample_SPA03.mb.40              | 42.20 | Bacteroidales      | 49194  | 4413723 |
| Sample_SPA03.mb.47cbin.1        | 57.60 | Enterobacteriaceae | 77652  | 5165760 |
| Sample_SPA04.Cluster15261cbin.1 | 36.20 | Bacteria           | 47794  | 2857125 |
| Sample_SPA04.mb.17              | 26.80 | Bacteria           | 84722  | 1141751 |
| Sample_SPA04.Cluster368cbin.1   | 58.70 | Clostridiales      | 51624  | 2100936 |
| Sample_SPA04.Cluster7492cbin.1  | 43.80 | Clostridiales      | 38976  | 2756035 |
| Sample_SPA04.mb.14cbin.1        | 49.50 | Clostridiales      | 90490  | 1876046 |
| Sample_SPA04.Cluster1305cbin.1  | 55.10 | Bacteroidetes      | 29785  | 1903017 |
| Sample_SPA04.Cluster6010cbin.1  | 47.50 | Lachnospiraceae    | 34613  | 2657614 |
| Sample_SPA04.Cluster1798cbin.1  | 57.30 | Proteobacteria     | 35834  | 1834535 |
| Sample_SPA04.Cluster5326        | 46.80 | Selenomonadales    | 116162 | 2282812 |
| Sample_SPA04.mb.42              | 26.10 | Bacteria           | 98561  | 1257940 |
| Sample_SPA04.Cluster12575       | 37.80 | Clostridiales      | 201351 | 1925637 |
| Sample_SPA04.Cluster88          | 58.50 | Clostridiales      | 90657  | 2395575 |
| Sample_SPA04.Cluster13556       | 37.40 | Clostridiales      | 123096 | 2720220 |

|                                 |       |                 |        |         |
|---------------------------------|-------|-----------------|--------|---------|
| Sample_SPA04.Cluster13447cbin.1 | 38.40 | Clostridiales   | 104682 | 2699803 |
| Sample_SPA04.mb.102             | 55.20 | Bacteroidetes   | 50767  | 2603733 |
| Sample_SPA04.Cluster14222       | 34.10 | Bacilli         | 5928   | 2111042 |
| Sample_SPA04.mb.119cbin.1       | 57.60 | Clostridiales   | 22942  | 3016864 |
| Sample_SPA04.mb.46              | 41.20 | Clostridiales   | 13206  | 2855294 |
| Sample_SPA04.mb.115cbin.1       | 29.80 | Bacteria        | 66896  | 2551862 |
| Sample_SPA04.mb.79cbin.1        | 52.90 | Clostridia      | 72775  | 2041584 |
| Sample_SPA04.mb.31              | 63.40 | Actinobacteria  | 64739  | 2637909 |
| Sample_SPA04.mb.89              | 53.00 | Clostridiales   | 9684   | 1754805 |
| Sample_SPA04.mb.71cbin.1        | 55.10 | Clostridiales   | 70060  | 2323907 |
| Sample_SPA04.mb.61              | 51.60 | Clostridiales   | 20979  | 2081793 |
| Sample_SPA04.mb.29              | 45.40 | Clostridiales   | 19031  | 2324228 |
| Sample_SPA04.mb.5               | 59.10 | Clostridiales   | 26295  | 2243610 |
| Sample_SPA04.mb.2               | 58.90 | Bacteroidetes   | 132302 | 2761286 |
| Sample_SPA04.mb.85              | 54.00 | Actinobacteria  | 185255 | 1672639 |
| Sample_SPA04.mb.73cbin.1        | 56.40 | Clostridiales   | 38587  | 2541584 |
| Sample_SPA04.mb.26              | 41.90 | Lachnospiraceae | 58339  | 2296107 |
| Sample_SPA04.mb.88cbin.1        | 48.40 | Clostridiales   | 31380  | 2719260 |
| Sample_SPA04.mb.57              | 51.10 | Clostridiales   | 234129 | 2292229 |
| Sample_SPA04.mb.53cbin.1        | 59.10 | Bacteroidetes   | 98928  | 2990673 |
| Sample_SPA04.mb.94              | 45.00 | Clostridiales   | 39637  | 2646147 |
| Sample_SPA04.mb.43cbin.1        | 44.40 | Prevotella      | 16129  | 3887347 |
| Sample_SPA04.mb.75              | 42.70 | Clostridiales   | 28000  | 2226916 |
| Sample_SPA04.mb.64cbin.1        | 45.10 | Bacteroidales   | 53217  | 4124134 |
| Sample_SPA06.Cluster13396       | 26.10 | Bacteria        | 70973  | 1071112 |
| Sample_SPA06.Cluster2511cbin.1  | 49.90 | Clostridiales   | 75829  | 2621544 |
| Sample_SPA06.Cluster6148        | 41.80 | Clostridiales   | 177579 | 2361202 |
| Sample_SPA06.Cluster317cbin.1   | 61.90 | Clostridiales   | 40070  | 2129530 |
| Sample_SPA06.Cluster781         | 58.30 | Clostridiales   | 55250  | 2876475 |
| Sample_SPA06.Cluster4378cbin.1  | 46.00 | Clostridiales   | 116556 | 2332381 |
| Sample_SPA06.Cluster178cbin.1   | 58.60 | Clostridiales   | 118290 | 2326819 |
| Sample_SPA06.Cluster476cbin.1   | 58.60 | Clostridiales   | 47543  | 2317398 |
| Sample_SPA06.Cluster442         | 59.70 | Actinobacteria  | 95817  | 2107603 |
| Sample_SPA06.Cluster1690cbin.1  | 54.20 | Clostridiales   | 185586 | 1719713 |
| Sample_SPA06.Cluster528cbin.1   | 58.30 | Clostridiales   | 46102  | 2440645 |
| Sample_SPA06.mb.117             | 49.60 | Clostridiales   | 111966 | 1970950 |
| Sample_SPA06.Cluster2162        | 52.00 | Clostridiales   | 187915 | 2237376 |
| Sample_SPA06.Cluster346cbin.1   | 60.10 | Bacteroidetes   | 44315  | 2513793 |
| Sample_SPA06.Cluster465cbin.1   | 63.10 | Actinobacteria  | 193037 | 2752174 |
| Sample_SPA06.mb.20              | 26.50 | Bacteria        | 62206  | 1320385 |
| Sample_SPA06.Cluster341cbin.1   | 58.60 | Clostridiales   | 68540  | 2978494 |
| Sample_SPA06.mb.26              | 27.80 | Bacteria        | 181823 | 1099964 |
| Sample_SPA06.Cluster12015       | 36.10 | Clostridiales   | 184689 | 2477150 |
| Sample_SPA06.mb.119             | 62.80 | Clostridiales   | 14535  | 1792169 |
| Sample_SPA06.mb.114cbin.1       | 48.10 | Clostridiales   | 109264 | 2930978 |
| Sample_SPA06.Cluster5570cbin.1  | 42.30 | Lachnospiraceae | 11769  | 2173773 |
| Sample_SPA06.Cluster625         | 58.20 | Bacteria        | 189472 | 3001991 |
| Sample_SPA06.mb.133             | 38.40 | Clostridiales   | 33565  | 2872887 |
| Sample_SPA06.Cluster6549cbin.1  | 43.70 | Clostridiales   | 161691 | 2837264 |
| Sample_SPA06.Cluster7016        | 43.00 | Clostridiales   | 134690 | 2377918 |
| Sample_SPA06.mb.134cbin.1       | 61.30 | Clostridiales   | 69259  | 1622684 |
| Sample_SPA06.Cluster12358       | 31.30 | Firmicutes      | 29601  | 2224115 |
| Sample_SPA06.mb.15              | 62.30 | Clostridiales   | 11507  | 2262512 |
| Sample_SPA06.mb.70              | 35.30 | Clostridiales   | 11768  | 2199822 |
| Sample_SPA06.mb.88cbin.1        | 42.60 | Bacteria        | 34752  | 5970849 |
| Sample_SPA06.mb.136cbin.1       | 49.10 | Bacteroidales   | 51212  | 3237762 |
| Sample_SPA06.mb.3cbin.1         | 56.30 | Clostridiales   | 98794  | 2358418 |
| Sample_SPA06.mb.92              | 34.10 | Clostridiales   | 90070  | 2246573 |



|                                 |       |                    |        |         |
|---------------------------------|-------|--------------------|--------|---------|
| Sample_SPA06.mb.27              | 47.80 | Clostridiales      | 41658  | 1927270 |
| Sample_SPA06.mb.5               | 41.00 | Lachnospiraceae    | 138961 | 2483925 |
| Sample_SPA06.mb.35              | 40.90 | Clostridiales      | 10954  | 1851819 |
| Sample_SPA06.Cluster5434        | 45.20 | Bacteroidales      | 179583 | 4196315 |
| Sample_SPA06.Cluster4291cbin.1  | 45.00 | Bacteroidales      | 116132 | 4451631 |
| Sample_SPA06.Cluster4973cbin.1  | 45.80 | Lachnospiraceae    | 78062  | 5499852 |
| Sample_SPA06.mb.93cbin.1        | 54.20 | Actinobacteria     | 138347 | 1674768 |
| Sample_SPA06.mb.95cbin.1        | 56.80 | Clostridiales      | 62831  | 2478908 |
| Sample_SPA06.mb.77cbin.1        | 38.00 | Clostridiales      | 140623 | 1956589 |
| Sample_SPA06.mb.7cbin.1         | 56.40 | Clostridiales      | 14891  | 2415276 |
| Sample_SPA06.mb.72cbin.1        | 43.60 | Lachnospiraceae    | 72634  | 2706896 |
| Sample_SPA06.Cluster4990cbin.1  | 51.20 | Enterobacteriaceae | 6190   | 3497519 |
| Sample_SPA06.mb.99cbin.1        | 60.20 | Bifidobacteriaceae | 175674 | 2336489 |
| Sample_SPA06.mb.59cbin.1        | 48.30 | Clostridiales      | 58424  | 6216417 |
| Sample_SPA07.Cluster12085       | 24.20 | Bacteria           | 108132 | 956466  |
| Sample_SPA07.Cluster12056       | 26.60 | Bacteria           | 86080  | 1188498 |
| Sample_SPA07.Cluster7043        | 43.70 | Clostridiales      | 73366  | 2668736 |
| Sample_SPA07.Cluster958cbin.1   | 58.20 | Clostridiales      | 58638  | 2888024 |
| Sample_SPA07.Cluster3082cbin.1  | 54.80 | Clostridiales      | 39677  | 2440889 |
| Sample_SPA07.Cluster544cbin.1   | 58.70 | Clostridiales      | 77166  | 2450184 |
| Sample_SPA07.mb.69cbin.1        | 47.70 | Bacteria           | 9210   | 1497200 |
| Sample_SPA07.Cluster99cbin.1    | 61.60 | Clostridiales      | 116865 | 1989112 |
| Sample_SPA07.Cluster356cbin.1   | 58.30 | Clostridiales      | 47570  | 2708558 |
| Sample_SPA07.mb.4               | 32.60 | Clostridiales      | 132007 | 3116104 |
| Sample_SPA07.mb.50              | 61.90 | Clostridiales      | 38250  | 1561983 |
| Sample_SPA07.mb.46cbin.1        | 57.10 | Clostridiales      | 16045  | 2294085 |
| Sample_SPA07.Cluster10244       | 38.70 | Streptococcus      | 27677  | 1595473 |
| Sample_SPA07.mb.9               | 26.30 | Bacteria           | 124936 | 1132468 |
| Sample_SPA07.Cluster6053cbin.1  | 44.40 | Clostridiales      | 146081 | 1928175 |
| Sample_SPA07.mb.54              | 56.70 | Clostridiales      | 28000  | 2387532 |
| Sample_SPA07.mb.30cbin.1        | 46.90 | Clostridiales      | 71031  | 2614408 |
| Sample_SPA07.mb.32cbin.1        | 64.10 | Actinobacteria     | 6620   | 2124463 |
| Sample_SPA07.mb.7cbin.1         | 37.70 | Clostridiales      | 86483  | 2961277 |
| Sample_SPA07.mb.37              | 54.40 | Bacteroidetes      | 99717  | 2192064 |
| Sample_SPA07.mb.43cbin.1        | 46.70 | Lachnospiraceae    | 70954  | 2850255 |
| Sample_SPA07.Cluster10547cbin.1 | 37.20 | Clostridiales      | 43693  | 2749403 |
| Sample_SPA07.mb.81cbin.1        | 58.00 | Clostridiales      | 12715  | 1984386 |
| Sample_SPA07.mb.31              | 59.80 | Bacteroidetes      | 14604  | 2585211 |
| Sample_SPA07.mb.62              | 29.90 | Bacteria           | 27111  | 2353384 |
| Sample_SPA07.mb.67              | 59.10 | Bacteroidetes      | 141162 | 2966222 |
| Sample_SPA07.Cluster8392cbin.1  | 40.50 | Bacteroidales      | 52915  | 3536241 |
| Sample_SPA07.mb.99cbin.1        | 60.10 | Actinobacteria     | 10140  | 1820199 |
| Sample_SPA07.mb.20cbin.1        | 44.30 | Bacteroidales      | 68258  | 3539272 |
| Sample_SPA07.mb.57              | 43.60 | Bacteroidales      | 95026  | 2709803 |
| Sample_SPA07.mb.82              | 49.80 | Lachnospiraceae    | 82635  | 2645295 |
| Sample_SPA07.mb.92              | 44.40 | Clostridiales      | 161445 | 2628461 |
| Sample_SPA07.Cluster5915cbin.1  | 45.40 | Bacteroidales      | 109121 | 4272890 |
| Sample_SPA07.mb.38cbin.1        | 47.00 | Bacteroidales      | 25927  | 3823374 |
| Sample_SPA07.mb.98cbin.1        | 41.30 | Lachnospiraceae    | 91172  | 2980285 |
| Sample_SPA08.Cluster4973        | 49.40 | Clostridiales      | 100876 | 1981446 |
| Sample_SPA08.mb.10              | 25.50 | Bacteria           | 229447 | 1400332 |
| Sample_SPA08.mb.105             | 26.20 | Bacteria           | 56155  | 1132679 |
| Sample_SPA08.mb.123cbin.1       | 41.50 | Bacteria           | 72325  | 3097210 |
| Sample_SPA08.mb.108             | 55.90 | Clostridiales      | 66166  | 1856828 |
| Sample_SPA08.Cluster744cbin.1   | 59.20 | Clostridiales      | 13802  | 1984403 |
| Sample_SPA08.Cluster60cbin.1    | 59.00 | Clostridiales      | 28599  | 2208373 |
| Sample_SPA08.Cluster216cbin.1   | 57.50 | Clostridiales      | 20110  | 2711839 |
| Sample_SPA08.Cluster8154        | 44.90 | Actinobacteria     | 296366 | 1843477 |

|                                 |       |                    |        |         |
|---------------------------------|-------|--------------------|--------|---------|
| Sample_SPA08.mb.101cbin.1       | 60.20 | Clostridiales      | 43959  | 1943488 |
| Sample_SPA08.mb.28cbin.1        | 51.50 | Bacteria           | 29061  | 1822554 |
| Sample_SPA08.mb.42              | 28.00 | Bacteria           | 24808  | 1160233 |
| Sample_SPA08.Cluster707cbin.1   | 55.50 | Bacteroidetes      | 10475  | 1847902 |
| Sample_SPA08.Cluster10169       | 40.90 | Clostridiales      | 169190 | 1951087 |
| Sample_SPA08.Cluster6153        | 46.40 | Bacteroidetes      | 349055 | 2374613 |
| Sample_SPA08.Cluster5908        | 43.50 | Selenomonadales    | 316579 | 2402720 |
| Sample_SPA08.Cluster6101cbin.1  | 46.20 | Lachnospiraceae    | 57496  | 3290288 |
| Sample_SPA08.mb.37              | 53.50 | Clostridiales      | 14903  | 1592129 |
| Sample_SPA08.Cluster1878        | 55.80 | Proteobacteria     | 117173 | 2198906 |
| Sample_SPA08.mb.119             | 62.40 | Actinobacteria     | 35957  | 2100421 |
| Sample_SPA08.mb.52              | 52.80 | Clostridia         | 70417  | 2119327 |
| Sample_SPA08.Cluster7637        | 44.40 | Clostridiales      | 137918 | 2244946 |
| Sample_SPA08.mb.115             | 61.00 | Clostridiales      | 21405  | 2124174 |
| Sample_SPA08.Cluster12217cbin.1 | 37.30 | Clostridiales      | 59692  | 2775247 |
| Sample_SPA08.Cluster5941cbin.1  | 45.40 | Prevotella         | 53143  | 3301695 |
| Sample_SPA08.mb.72              | 29.20 | Bacteria           | 135241 | 1606653 |
| Sample_SPA08.mb.29              | 53.60 | Clostridiales      | 30538  | 1970868 |
| Sample_SPA08.mb.13              | 54.60 | Clostridia         | 135172 | 2536629 |
| Sample_SPA08.mb.124             | 61.00 | Bacteroidetes      | 13217  | 2267158 |
| Sample_SPA08.mb.40              | 58.20 | Clostridiales      | 34437  | 2102841 |
| Sample_SPA08.mb.47cbin.1        | 48.90 | Clostridiales      | 9582   | 2493059 |
| Sample_SPA08.mb.120             | 40.90 | Lachnospiraceae    | 52815  | 2372007 |
| Sample_SPA08.mb.65cbin.1        | 61.50 | Clostridiales      | 60217  | 1858675 |
| Sample_SPA08.mb.17              | 53.40 | Clostridiales      | 189725 | 1900988 |
| Sample_SPA08.mb.56              | 56.60 | Clostridiales      | 14479  | 2185002 |
| Sample_SPA08.Cluster6551cbin.1  | 43.10 | Bacteria           | 20891  | 3937276 |
| Sample_SPA08.mb.75cbin.1        | 51.00 | Clostridiales      | 25786  | 2299310 |
| Sample_SPA08.mb.83cbin.1        | 56.40 | Clostridiales      | 53542  | 2633390 |
| Sample_SPA08.mb.70cbin.1        | 45.00 | Clostridiales      | 13242  | 1860431 |
| Sample_SPA08.mb.68              | 46.20 | Clostridiales      | 27371  | 2009909 |
| Sample_SPA08.mb.74              | 51.50 | Clostridiales      | 151753 | 2117302 |
| Sample_SPA08.mb.14cbin.1        | 41.90 | Lachnospiraceae    | 69808  | 2448333 |
| Sample_SPA08.mb.66              | 44.80 | Lachnospiraceae    | 77768  | 2556661 |
| Sample_SPA08.mb.64cbin.1        | 59.50 | Clostridiales      | 18518  | 2179564 |
| Sample_SPA08.mb.86              | 63.30 | Actinobacteria     | 68405  | 2640701 |
| Sample_SPA08.mb.4cbin.1         | 41.10 | Lachnospiraceae    | 82175  | 2939584 |
| Sample_SPA08.mb.90cbin.1        | 38.20 | Lactobacillales    | 133054 | 1942286 |
| Sample_SPA08.mb.125             | 46.20 | Bacteroidales      | 191363 | 4321658 |
| Sample_SPA08.mb.97cbin.1        | 58.30 | Bacteroidetes      | 165220 | 3305564 |
| Sample_SPA08.mb.80cbin.1        | 43.10 | Bacteria           | 20239  | 4276963 |
| Sample_SPA09.mb.27cbin.1        | 36.90 | Bacteria           | 80714  | 3007954 |
| Sample_SPA09.mb.2cbin.1         | 27.00 | Bacteria           | 46121  | 2752542 |
| Sample_SPA09.Cluster5439cbin.1  | 42.30 | Clostridiales      | 8604   | 2345142 |
| Sample_SPA09.mb.40cbin.1        | 41.10 | Clostridiales      | 15990  | 2924725 |
| Sample_SPA09.mb.10cbin.1        | 52.30 | Clostridiales      | 161299 | 2188179 |
| Sample_SPA09.mb.90              | 38.50 | Clostridiales      | 7882   | 1868209 |
| Sample_SPA09.Cluster6961        | 42.10 | Clostridiales      | 63289  | 1734696 |
| Sample_SPA09.Cluster404cbin.1   | 56.60 | Clostridiales      | 15434  | 2462654 |
| Sample_SPA09.mb.93cbin.1        | 37.20 | Clostridiales      | 5950   | 2042855 |
| Sample_SPA09.mb.63cbin.1        | 48.30 | Clostridiales      | 23298  | 2698196 |
| Sample_SPA09.mb.91              | 38.80 | Clostridiales      | 34035  | 2656638 |
| Sample_SPA09.Cluster1823        | 56.30 | Bifidobacteriaceae | 333591 | 2170563 |
| Sample_SPA09.mb.58              | 49.40 | Clostridiales      | 33535  | 2576988 |
| Sample_SPA09.mb.48              | 43.30 | Lachnospiraceae    | 38899  | 2133938 |
| Sample_SPA09.mb.38              | 60.30 | Bifidobacteriaceae | 48256  | 2202543 |
| Sample_SPA09.mb.80cbin.1        | 41.30 | Lachnospiraceae    | 95990  | 3362225 |
| Sample_SPA09.mb.67              | 47.00 | Lachnospiraceae    | 28433  | 2691712 |

|                                 |       |                     |        |         |
|---------------------------------|-------|---------------------|--------|---------|
| Sample_SPA09.Cluster10012cbin.1 | 42.90 | Lachnospiraceae     | 90807  | 3093254 |
| Sample_SPA09.mb.15cbin.1        | 41.20 | Lachnospiraceae     | 93660  | 3000854 |
| Sample_SPA09.mb.39              | 58.60 | Bacteroidetes       | 201978 | 2867443 |
| Sample_SPA09.Cluster6494cbin.1  | 43.40 | Bacteroidales       | 317117 | 3168248 |
| Sample_SPA09.mb.89              | 41.20 | Clostridiales       | 70715  | 2490496 |
| Sample_SPA09.mb.99cbin.1        | 54.50 | Bacteroidetes       | 127840 | 2107385 |
| Sample_SPA09.mb.20              | 46.20 | Bacteroidales       | 161847 | 3268051 |
| Sample_SPA09.mb.28              | 42.80 | Lachnospiraceae     | 77792  | 3310384 |
| Sample_SPA09.mb.88cbin.1        | 48.50 | Proteobacteria      | 77270  | 2492999 |
| Sample_SPA09.mb.82cbin.1        | 45.40 | Bacteroidales       | 23594  | 4455333 |
| Sample_SPA09.Cluster99cbin.1    | 50.90 | Enterobacteriaceae  | 50103  | 4600681 |
| Sample_SPA10.mb.16cbin.1        | 48.00 | Clostridiales       | 103449 | 2961963 |
| Sample_SPA10.mb.26              | 61.40 | Clostridiales       | 80933  | 2572021 |
| Sample_SPA10.mb.36cbin.1        | 56.80 | Clostridiales       | 6898   | 2079446 |
| Sample_SPA10.mb.42              | 49.00 | Clostridiales       | 49710  | 2557711 |
| Sample_SPA10.mb.19              | 38.10 | Clostridiales       | 80428  | 1979895 |
| Sample_SPA10.mb.53cbin.1        | 35.60 | Clostridiales       | 13507  | 4403727 |
| Sample_SPA10.mb.20cbin.1        | 58.50 | Clostridiales       | 45386  | 2143247 |
| Sample_SPA10.mb.29cbin.1        | 43.90 | Lachnospiraceae     | 141523 | 2573027 |
| Sample_SPA10.mb.61              | 38.80 | Clostridiales       | 94863  | 2113999 |
| Sample_SPA10.Cluster4817        | 35.90 | Clostridiales       | 207491 | 2593651 |
| Sample_SPA10.mb.48              | 46.40 | Lachnospiraceae     | 25737  | 2523366 |
| Sample_SPA10.mb.34              | 60.30 | Deltaproteobacteria | 27716  | 3756092 |
| Sample_SPA10.mb.31cbin.1        | 43.80 | Clostridiales       | 169245 | 2907990 |
| Sample_SPA10.mb.55              | 42.20 | Lachnospiraceae     | 68228  | 2170133 |
| Sample_SPA10.Cluster1134cbin.1  | 48.40 | Proteobacteria      | 74358  | 2585026 |
| Sample_SPA10.mb.51cbin.1        | 41.70 | Lachnospiraceae     | 83960  | 2372718 |
| Sample_SPA10.Cluster25cbin.1    | 64.60 | Actinobacteria      | 15808  | 3158875 |
| Sample_SPA10.mb.15cbin.1        | 46.00 | Bacteroidales       | 143586 | 3486899 |
| Sample_SPA10.mb.18cbin.1        | 46.40 | Bacteroidales       | 117024 | 4025242 |
| Sample_SPA10.mb.17cbin.1        | 44.90 | Bacteroidales       | 181401 | 4676751 |
| Sample_SPA10.Cluster1582cbin.1  | 41.80 | Bacteroides         | 28828  | 4479277 |
| Sample_SPA10.Cluster2898        | 41.40 | Bacteroidales       | 226243 | 5092758 |
| Sample_SPA11.Cluster4973cbin.1  | 43.80 | Clostridiales       | 9757   | 2591711 |
| Sample_SPA11.Cluster127cbin.1   | 60.80 | Clostridiales       | 12913  | 1762744 |
| Sample_SPA11.Cluster6814cbin.1  | 41.90 | Clostridiales       | 130911 | 2652117 |
| Sample_SPA11.Cluster5732        | 45.30 | Actinobacteria      | 180474 | 1930422 |
| Sample_SPA11.Cluster231cbin.1   | 59.40 | Clostridiales       | 51368  | 2182278 |
| Sample_SPA11.Cluster440cbin.1   | 59.80 | Actinobacteria      | 93951  | 2016922 |
| Sample_SPA11.Cluster6967cbin.1  | 48.20 | Clostridiales       | 105696 | 2802157 |
| Sample_SPA11.Cluster79cbin.1    | 60.50 | Clostridiales       | 57401  | 2428596 |
| Sample_SPA11.Cluster12075cbin.1 | 33.30 | Bacteria            | 21403  | 2831782 |
| Sample_SPA11.Cluster73cbin.1    | 58.40 | Clostridiales       | 122066 | 2503701 |
| Sample_SPA11.Cluster5881cbin.1  | 46.40 | Lachnospiraceae     | 64291  | 2939778 |
| Sample_SPA11.Cluster3236        | 51.50 | Clostridiales       | 217962 | 2136948 |
| Sample_SPA11.Cluster5039        | 47.40 | Selenomonadales     | 66931  | 2166592 |
| Sample_SPA11.Cluster1285        | 55.60 | Proteobacteria      | 149048 | 2231820 |
| Sample_SPA11.mb.118             | 51.80 | Clostridiales       | 20273  | 2051896 |
| Sample_SPA11.Cluster2524cbin.1  | 53.30 | Clostridiales       | 110144 | 2410935 |
| Sample_SPA11.Cluster10740       | 38.50 | Clostridiales       | 66257  | 2501321 |
| Sample_SPA11.mb.55cbin.1        | 58.80 | Bacteria            | 23443  | 2082026 |
| Sample_SPA11.mb.39cbin.1        | 59.20 | Clostridia          | 28876  | 2859572 |
| Sample_SPA11.Cluster9675        | 40.60 | Clostridiales       | 190116 | 2027379 |
| Sample_SPA11.mb.12cbin.1        | 53.40 | Clostridiales       | 8426   | 2405905 |
| Sample_SPA11.mb.16cbin.1        | 57.40 | Clostridiales       | 48051  | 2097515 |
| Sample_SPA11.mb.14              | 59.20 | Clostridiales       | 18065  | 2151195 |
| Sample_SPA11.Cluster8660        | 41.40 | Lachnospiraceae     | 83235  | 2796615 |
| Sample_SPA11.mb.101cbin.1       | 37.40 | Clostridiales       | 49624  | 2640016 |

|                                 |       |                 |        |         |
|---------------------------------|-------|-----------------|--------|---------|
| Sample_SPA11.mb.78cbin.1        | 58.40 | Clostridiales   | 42960  | 2962489 |
| Sample_SPA11.mb.18cbin.1        | 60.00 | Bacteroidetes   | 37100  | 2647740 |
| Sample_SPA11.Cluster4412cbin.1  | 43.30 | Bacteria        | 27894  | 4017397 |
| Sample_SPA11.Cluster4833cbin.1  | 44.20 | Bacteroidales   | 73314  | 3742874 |
| Sample_SPA11.mb.21              | 44.00 | Clostridiales   | 197213 | 2836039 |
| Sample_SPA11.mb.111cbin.1       | 41.70 | Lachnospiraceae | 75912  | 2451682 |
| Sample_SPA11.Cluster1799cbin.1  | 45.70 | Bacteroidales   | 9488   | 3823449 |
| Sample_SPA11.mb.41              | 54.40 | Bacteroidetes   | 95059  | 2098583 |
| Sample_SPA11.Cluster5091        | 45.40 | Bacteroidales   | 139841 | 3979989 |
| Sample_SPA11.mb.43              | 56.40 | Clostridiales   | 11270  | 2372144 |
| Sample_SPA11.mb.3               | 43.60 | Clostridiales   | 13145  | 2799763 |
| Sample_SPA11.mb.37              | 44.20 | Clostridiales   | 162094 | 2567120 |
| Sample_SPA11.mb.38cbin.1        | 42.80 | Clostridiales   | 147603 | 2649873 |
| Sample_SPA11.mb.93              | 41.00 | Clostridiales   | 27504  | 3361947 |
| Sample_SPA11.mb.85              | 61.90 | Clostridiales   | 33857  | 2309186 |
| Sample_SPA11.mb.58cbin.1        | 58.20 | Clostridiales   | 8466   | 2220916 |
| Sample_SPA11.mb.62              | 42.30 | Streptococcus   | 29941  | 1949820 |
| Sample_SPA11.mb.36              | 43.40 | Bacteroidales   | 296971 | 3276034 |
| Sample_SPA11.mb.9cbin.1         | 58.40 | Bacteroidetes   | 140614 | 2595535 |
| Sample_SPA11.mb.51cbin.1        | 44.30 | Prevotella      | 14989  | 3918795 |
| Sample_SPA11.mb.74cbin.1        | 45.80 | Bacteroidales   | 75321  | 2958727 |
| Sample_SPA11.mb.50              | 47.00 | Bacteroidales   | 26769  | 3697184 |
| Sample_SPA11.mb.92              | 42.20 | Bacteroidales   | 31381  | 4065030 |
| Sample_SPA12.Cluster24708cbin.1 | 26.00 | Bacteria        | 71722  | 1263517 |
| Sample_SPA12.Cluster11878       | 43.90 | Clostridiales   | 10792  | 2569903 |
| Sample_SPA12.Cluster259         | 61.20 | Clostridiales   | 21370  | 1480570 |
| Sample_SPA12.mb.127             | 29.40 | Bacteria        | 35554  | 1433558 |
| Sample_SPA12.Cluster10362       | 46.10 | Clostridiales   | 101951 | 2156629 |
| Sample_SPA12.mb.124cbin.1       | 49.90 | Clostridiales   | 10315  | 1808921 |
| Sample_SPA12.Cluster18234cbin.1 | 49.80 | Clostridiales   | 67426  | 2264547 |
| Sample_SPA12.Cluster17354cbin.1 | 41.40 | Clostridiales   | 13186  | 3611413 |
| Sample_SPA12.mb.101             | 52.00 | Clostridiales   | 9260   | 1919430 |
| Sample_SPA12.Cluster23502cbin.1 | 33.50 | Bacteria        | 25344  | 2286292 |
| Sample_SPA12.mb.117             | 37.30 | Clostridiales   | 31513  | 2428314 |
| Sample_SPA12.Cluster5511cbin.1  | 51.90 | Bacteroidales   | 17749  | 2168990 |
| Sample_SPA12.Cluster20418cbin.1 | 41.90 | Clostridiales   | 118008 | 2329984 |
| Sample_SPA12.mb.27              | 52.80 | Clostridia      | 73144  | 2229291 |
| Sample_SPA12.mb.21cbin.1        | 45.20 | Actinobacteria  | 10132  | 1742194 |
| Sample_SPA12.mb.147             | 44.50 | Clostridiales   | 38254  | 2799076 |
| Sample_SPA12.Cluster5034        | 55.60 | Bacteria        | 180588 | 2682018 |
| Sample_SPA12.mb.109cbin.1       | 45.90 | Clostridiales   | 19895  | 2008596 |
| Sample_SPA12.mb.22cbin.1        | 62.10 | Clostridiales   | 20991  | 1983940 |
| Sample_SPA12.mb.68cbin.1        | 45.60 | Clostridiales   | 97059  | 1783989 |
| Sample_SPA12.mb.73              | 27.20 | Clostridiales   | 102760 | 1840883 |
| Sample_SPA12.mb.52cbin.1        | 48.80 | Clostridiales   | 20808  | 2559188 |
| Sample_SPA12.mb.31              | 61.20 | Clostridiales   | 10334  | 2034590 |
| Sample_SPA12.mb.14cbin.1        | 38.60 | Clostridiales   | 9096   | 2488010 |
| Sample_SPA12.mb.89              | 60.40 | Clostridiales   | 6811   | 2415327 |
| Sample_SPA12.mb.34cbin.1        | 51.00 | Firmicutes      | 54269  | 2215406 |
| Sample_SPA12.mb.95              | 63.40 | Clostridiales   | 11583  | 2069009 |
| Sample_SPA12.mb.50              | 63.60 | Actinobacteria  | 12590  | 2479741 |
| Sample_SPA12.mb.36cbin.1        | 50.70 | Bacteroidales   | 140687 | 2195609 |
| Sample_SPA12.mb.80              | 56.40 | Clostridiales   | 15050  | 2711179 |
| Sample_SPA12.mb.90              | 41.10 | Lachnospiraceae | 103319 | 2363469 |
| Sample_SPA12.mb.59              | 36.00 | Clostridiales   | 19435  | 2691930 |
| Sample_SPA12.mb.86              | 47.00 | Prevotella      | 22410  | 2259126 |
| Sample_SPA12.mb.96              | 47.80 | Selenomonadales | 33852  | 1960975 |
| Sample_SPA12.mb.82              | 62.60 | Proteobacteria  | 33888  | 2276277 |

|                                 |       |                     |        |         |
|---------------------------------|-------|---------------------|--------|---------|
| Sample_SPA12.mb.94              | 42.80 | Clostridiales       | 92795  | 2699425 |
| Sample_SPA12.mb.9cbin.1         | 51.10 | Clostridiales       | 127015 | 2242536 |
| Sample_SPA12.mb.37              | 45.40 | Bacteroidales       | 18684  | 4180507 |
| Sample_SPA12.Cluster1195cbin.1  | 57.70 | Enterobacteriaceae  | 129534 | 5137795 |
| Sample_SPA12.mb.65              | 41.70 | Bacteroides         | 82266  | 4955000 |
| Sample_SPA13.Cluster985cbin.1   | 48.20 | Clostridia          | 25964  | 1924874 |
| Sample_SPA13.Cluster7268cbin.1  | 35.90 | Clostridiales       | 227738 | 1983101 |
| Sample_SPA13.Cluster230         | 60.60 | Clostridiales       | 98380  | 1759266 |
| Sample_SPA13.mb.38              | 57.90 | Clostridiales       | 57027  | 2147556 |
| Sample_SPA13.mb.12              | 36.70 | Clostridiales       | 106436 | 2237955 |
| Sample_SPA13.mb.61cbin.1        | 41.40 | Bacteria            | 13394  | 6682366 |
| Sample_SPA13.Cluster160         | 61.70 | Actinobacteria      | 94802  | 2256520 |
| Sample_SPA13.mb.46              | 54.40 | Actinobacteria      | 102695 | 1603387 |
| Sample_SPA13.mb.33              | 37.70 | Clostridiales       | 49013  | 4079714 |
| Sample_SPA13.Cluster5892        | 40.70 | Clostridiales       | 197859 | 1972793 |
| Sample_SPA13.mb.19cbin.1        | 43.80 | Selenomonadales     | 18029  | 2299074 |
| Sample_SPA13.Cluster518         | 56.20 | Bifidobacteriaceae  | 68909  | 1922104 |
| Sample_SPA13.Cluster288         | 59.30 | Bifidobacteriaceae  | 114083 | 2210647 |
| Sample_SPA13.Cluster281         | 60.00 | Bifidobacteriaceae  | 216847 | 2300148 |
| Sample_SPA13.Cluster824         | 54.20 | Proteobacteria      | 101610 | 2392064 |
| Sample_SPA13.mb.47cbin.1        | 31.60 | Euryarchaeota       | 5406   | 1414765 |
| Sample_SPA13.mb.62cbin.1        | 60.60 | Clostridiales       | 86478  | 2449281 |
| Sample_SPA13.Cluster4841        | 41.30 | Lachnospiraceae     | 66283  | 2909485 |
| Sample_SPA13.mb.3               | 58.60 | Clostridiales       | 36628  | 3097449 |
| Sample_SPA13.Cluster428cbin.1   | 56.90 | Clostridiales       | 115233 | 2721915 |
| Sample_SPA13.mb.74cbin.1        | 37.00 | Clostridiales       | 65714  | 2852329 |
| Sample_SPA13.mb.6               | 58.60 | Bacteroidetes       | 152901 | 2404530 |
| Sample_SPA13.mb.29              | 60.10 | Actinobacteria      | 149370 | 3908526 |
| Sample_SPA13.mb.36              | 49.10 | Proteobacteria      | 12283  | 2178634 |
| Sample_SPA13.Cluster2414cbin.1  | 45.80 | Bacteroidales       | 119473 | 3596788 |
| Sample_SPA13.mb.49              | 43.50 | Clostridiales       | 8744   | 3139807 |
| Sample_SPA13.mb.24              | 41.50 | Clostridiales       | 48677  | 3153857 |
| Sample_SPA13.Cluster3020        | 45.30 | Bacteroidales       | 134524 | 3925165 |
| Sample_SPA13.mb.50              | 43.30 | Bacteroidales       | 279781 | 3157228 |
| Sample_SPA13.Cluster2319cbin.1  | 46.60 | Bacteroidales       | 106078 | 3961310 |
| Sample_SPA13.mb.67cbin.1        | 41.70 | Clostridiales       | 126939 | 3277112 |
| Sample_SPA13.mb.65              | 64.60 | Actinobacteria      | 17036  | 2639515 |
| Sample_SPA13.mb.86              | 43.30 | Lachnospiraceae     | 137804 | 2950270 |
| Sample_SPA13.mb.69              | 41.70 | Lachnospiraceae     | 64711  | 2538058 |
| Sample_SPA13.mb.64cbin.1        | 45.20 | Bacteroidales       | 131074 | 4759774 |
| Sample_SPA15.Cluster10137       | 45.40 | Clostridia          | 84321  | 1700065 |
| Sample_SPA15.mb.22              | 52.80 | Clostridia          | 68512  | 2089464 |
| Sample_SPA15.Cluster344         | 61.60 | Clostridiales       | 58649  | 1485345 |
| Sample_SPA15.Cluster227cbin.1   | 59.10 | Deltaproteobacteria | 15155  | 2259092 |
| Sample_SPA15.mb.23              | 58.40 | Clostridiales       | 18657  | 1608057 |
| Sample_SPA15.Cluster15391cbin.1 | 40.80 | Clostridiales       | 10670  | 2746229 |
| Sample_SPA15.mb.4               | 49.60 | Clostridiales       | 114522 | 1953334 |
| Sample_SPA15.mb.29              | 52.90 | Actinobacteria      | 12471  | 1612495 |
| Sample_SPA15.mb.102cbin.1       | 57.50 | Clostridiales       | 11552  | 2002305 |
| Sample_SPA15.Cluster523         | 57.50 | Clostridiales       | 270695 | 1623773 |
| Sample_SPA15.mb.24cbin.1        | 59.70 | Clostridiales       | 74126  | 2260009 |
| Sample_SPA15.mb.38              | 47.80 | Clostridiales       | 23152  | 2026336 |
| Sample_SPA15.mb.28              | 59.50 | Clostridiales       | 68534  | 1998995 |
| Sample_SPA15.mb.59cbin.1        | 53.70 | Clostridia          | 11223  | 1666138 |
| Sample_SPA15.Cluster3881        | 53.10 | Clostridiales       | 208769 | 2163516 |
| Sample_SPA15.mb.35              | 56.70 | Clostridiales       | 20804  | 2089525 |
| Sample_SPA15.Cluster7678cbin.1  | 46.70 | Selenomonadales     | 57989  | 2526376 |
| Sample_SPA15.mb.58              | 60.60 | Clostridiales       | 36201  | 1861468 |

|                                 |       |                     |        |         |
|---------------------------------|-------|---------------------|--------|---------|
| Sample_SPA15.mb.54              | 57.00 | Clostridiales       | 21291  | 1924193 |
| Sample_SPA15.mb.65              | 57.10 | Clostridiales       | 77262  | 2117624 |
| Sample_SPA15.mb.81              | 58.10 | Clostridiales       | 14279  | 2238760 |
| Sample_SPA15.mb.91cbin.1        | 51.90 | Bacteroidetes       | 32591  | 2990301 |
| Sample_SPA15.mb.63              | 48.20 | Clostridiales       | 35169  | 1932216 |
| Sample_SPA15.mb.55              | 46.00 | Clostridiales       | 10645  | 2478773 |
| Sample_SPA15.mb.66              | 51.50 | Clostridiales       | 117060 | 2107389 |
| Sample_SPA15.mb.71              | 33.70 | Clostridiales       | 67126  | 2092438 |
| Sample_SPA15.mb.88              | 44.20 | Clostridiales       | 180533 | 2287692 |
| Sample_SPA15.Cluster8224cbin.1  | 46.60 | Bacteroidales       | 29894  | 4417384 |
| Sample_SPA15.Cluster10540cbin.1 | 43.60 | Bacteroidales       | 107193 | 4991493 |
| Sample_SPA15.mb.13cbin.1        | 43.40 | Bacteroidales       | 11952  | 5952366 |
| Sample_SPA15.Cluster1062cbin.1  | 57.60 | Enterobacteriaceae  | 190343 | 4991413 |
| Sample_SPA15.mb.69cbin.1        | 51.00 | Enterobacteriaceae  | 108131 | 4505189 |
| Sample_SPA16.Cluster3423cbin.1  | 48.80 | Clostridiales       | 22961  | 2158973 |
| Sample_SPA16.Cluster10324cbin.1 | 33.60 | Bacteria            | 49439  | 2205378 |
| Sample_SPA16.Cluster9401cbin.1  | 43.40 | Clostridiales       | 42165  | 2440103 |
| Sample_SPA16.Cluster3843        | 46.40 | Lactobacillales     | 141994 | 2000074 |
| Sample_SPA16.Cluster2004cbin.1  | 50.00 | Bacteroidales       | 39014  | 2450443 |
| Sample_SPA16.mb.2cbin.1         | 34.20 | Bacilli             | 46670  | 2674383 |
| Sample_SPA16.mb.1               | 59.70 | Actinobacteria      | 48685  | 2222828 |
| Sample_SPA16.mb.117cbin.1       | 61.30 | Clostridiales       | 13398  | 2035044 |
| Sample_SPA16.mb.59              | 38.30 | Clostridiales       | 33574  | 3056252 |
| Sample_SPA16.Cluster967cbin.1   | 57.30 | Proteobacteria      | 26558  | 1877694 |
| Sample_SPA16.mb.38              | 47.40 | Lachnospiraceae     | 10502  | 2375754 |
| Sample_SPA16.mb.46              | 49.80 | Clostridiales       | 13129  | 2092297 |
| Sample_SPA16.mb.65cbin.1        | 35.60 | Clostridiales       | 26265  | 3724532 |
| Sample_SPA16.mb.42              | 43.60 | Lachnospiraceae     | 40798  | 1724910 |
| Sample_SPA16.Cluster6977cbin.1  | 41.30 | Lachnospiraceae     | 83772  | 2832669 |
| Sample_SPA16.Cluster9846cbin.1  | 38.60 | Clostridiales       | 121638 | 2905305 |
| Sample_SPA16.mb.77              | 49.30 | Clostridiales       | 20294  | 2455059 |
| Sample_SPA16.Cluster3151cbin.1  | 44.20 | Bacteroidales       | 63538  | 3572094 |
| Sample_SPA16.mb.39cbin.1        | 36.90 | Clostridiales       | 81881  | 2954212 |
| Sample_SPA16.mb.54              | 37.40 | Clostridiales       | 126529 | 2627665 |
| Sample_SPA16.mb.88              | 38.30 | Clostridiales       | 9237   | 1605856 |
| Sample_SPA16.mb.48              | 26.90 | Clostridiales       | 87245  | 2691325 |
| Sample_SPA16.mb.14cbin.1        | 41.30 | Lachnospiraceae     | 17563  | 3512204 |
| Sample_SPA16.mb.9               | 59.10 | Clostridiales       | 19190  | 2559816 |
| Sample_SPA16.mb.69              | 58.40 | Bifidobacteriaceae  | 155051 | 2425821 |
| Sample_SPA16.mb.99cbin.1        | 46.40 | Bacillus            | 27744  | 3810275 |
| Sample_SPA17.Cluster7053cbin.1  | 27.00 | Bacteria            | 10800  | 2715480 |
| Sample_SPA17.mb.52              | 47.80 | Clostridiales       | 137449 | 1922881 |
| Sample_SPA17.Cluster449         | 55.20 | Clostridiales       | 81354  | 2110201 |
| Sample_SPA17.mb.95cbin.1        | 46.70 | Bacteria            | 120581 | 4036741 |
| Sample_SPA17.Cluster1797        | 46.80 | Lactobacillales     | 44701  | 1836758 |
| Sample_SPA17.mb.44              | 48.10 | Clostridiales       | 39628  | 3015373 |
| Sample_SPA17.mb.17              | 49.60 | Clostridiales       | 11204  | 2250227 |
| Sample_SPA17.mb.79              | 61.80 | Clostridiales       | 11367  | 1812548 |
| Sample_SPA17.Cluster1537        | 43.50 | Selenomonadales     | 267595 | 2339909 |
| Sample_SPA17.mb.41cbin.1        | 54.60 | Bacteroidetes       | 68858  | 2208455 |
| Sample_SPA17.mb.3cbin.1         | 60.00 | Actinobacteria      | 87802  | 2367105 |
| Sample_SPA17.mb.39cbin.1        | 59.80 | Bifidobacteriaceae  | 62657  | 1771397 |
| Sample_SPA17.mb.78cbin.1        | 48.70 | Clostridiales       | 95376  | 2633730 |
| Sample_SPA17.mb.36cbin.1        | 29.40 | Bacteria            | 57089  | 2284951 |
| Sample_SPA17.mb.24              | 50.80 | Bacteroidales       | 54483  | 2143680 |
| Sample_SPA17.Cluster883cbin.1   | 57.20 | Clostridiales       | 45990  | 2238151 |
| Sample_SPA17.mb.33cbin.1        | 60.60 | Deltaproteobacteria | 7370   | 3182461 |
| Sample_SPA17.mb.76              | 43.60 | Lachnospiraceae     | 37086  | 1841669 |

|                                 |       |                    |        |         |
|---------------------------------|-------|--------------------|--------|---------|
| Sample_SPA17.Cluster6320        | 35.90 | Clostridiales      | 328199 | 2696095 |
| Sample_SPA17.Cluster4831cbin.1  | 37.30 | Clostridiales      | 21529  | 2640817 |
| Sample_SPA17.mb.75cbin.1        | 57.40 | Proteobacteria     | 56709  | 2379134 |
| Sample_SPA17.mb.98              | 60.50 | Clostridiales      | 44523  | 1887009 |
| Sample_SPA17.mb.8cbin.1         | 32.50 | Lactobacillales    | 224568 | 1918422 |
| Sample_SPA17.Cluster6508        | 30.30 | Bacteria           | 79675  | 3386714 |
| Sample_SPA17.mb.114             | 41.10 | Lachnospiraceae    | 45267  | 3540102 |
| Sample_SPA17.mb.88cbin.1        | 48.60 | Proteobacteria     | 28588  | 2221676 |
| Sample_SPA17.mb.70              | 42.40 | Bacteroides        | 56714  | 3898415 |
| Sample_SPA17.mb.16cbin.1        | 45.30 | Bacteroidales      | 131656 | 3981430 |
| Sample_SPA17.mb.108cbin.1       | 41.80 | Bacteroidales      | 94778  | 4239342 |
| Sample_SPA17.Cluster2740        | 44.90 | Bacteroidales      | 263469 | 4691645 |
| Sample_SPA17.mb.97cbin.1        | 51.00 | Enterobacteriaceae | 173514 | 3725242 |
| Sample_SPA20.mb.23              | 38.10 | Clostridiales      | 23308  | 2606020 |
| Sample_SPA20.mb.12cbin.1        | 37.20 | Clostridiales      | 54872  | 2745327 |
| Sample_SPA20.mb.36              | 33.60 | Clostridiales      | 116680 | 2970189 |
| Sample_SPA20.Cluster2573        | 46.90 | Lactobacillales    | 121463 | 1863573 |
| Sample_SPA20.mb.5               | 34.20 | Bacteria           | 39073  | 1883296 |
| Sample_SPA20.mb.32cbin.1        | 59.90 | Actinobacteria     | 49254  | 2181210 |
| Sample_SPA20.Cluster1446cbin.1  | 48.60 | Firmicutes         | 32775  | 1944608 |
| Sample_SPA20.mb.39cbin.1        | 52.30 | Clostridiales      | 9225   | 1740734 |
| Sample_SPA20.mb.61cbin.1        | 48.60 | Clostridiales      | 14045  | 2681368 |
| Sample_SPA20.Cluster130         | 60.00 | Bifidobacteriaceae | 195783 | 2194529 |
| Sample_SPA20.mb.9               | 54.00 | Clostridiales      | 71397  | 1831206 |
| Sample_SPA20.mb.6cbin.1         | 40.90 | Clostridiales      | 135024 | 1871842 |
| Sample_SPA20.Cluster6883cbin.1  | 32.50 | Lactobacillales    | 93959  | 1892566 |
| Sample_SPA20.Cluster4938cbin.1  | 40.60 | Lachnospiraceae    | 81319  | 2596336 |
| Sample_SPA20.mb.24cbin.1        | 49.00 | Proteobacteria     | 40542  | 2206204 |
| Sample_SPA20.mb.43              | 44.50 | Clostridiales      | 67821  | 2901578 |
| Sample_SPA20.Cluster2412cbin.1  | 44.00 | Bacteroidales      | 59407  | 3826577 |
| Sample_SPA21.Cluster2186cbin.1  | 51.20 | Bacteria           | 19431  | 1860231 |
| Sample_SPA21.mb.117             | 27.60 | Bacteria           | 296100 | 1275942 |
| Sample_SPA21.Cluster11127cbin.1 | 37.20 | Clostridiales      | 11252  | 2316297 |
| Sample_SPA21.Cluster18          | 62.40 | Clostridiales      | 9738   | 1340107 |
| Sample_SPA21.mb.25              | 26.70 | Bacteria           | 148895 | 1326539 |
| Sample_SPA21.mb.113cbin.1       | 58.10 | Clostridiales      | 49857  | 2970916 |
| Sample_SPA21.Cluster4618cbin.1  | 46.30 | Clostridiales      | 42347  | 2070708 |
| Sample_SPA21.mb.103             | 57.10 | Clostridiales      | 79333  | 2164862 |
| Sample_SPA21.Cluster6505cbin.1  | 42.20 | Clostridiales      | 68131  | 3592593 |
| Sample_SPA21.Cluster7151cbin.1  | 45.10 | Clostridiales      | 84684  | 2474161 |
| Sample_SPA21.mb.65              | 41.00 | Bacteria           | 17139  | 3184023 |
| Sample_SPA21.Cluster10395cbin.1 | 38.70 | Clostridiales      | 94796  | 2010745 |
| Sample_SPA21.mb.110             | 46.90 | Lachnospiraceae    | 66396  | 2836108 |
| Sample_SPA21.Cluster6611        | 44.20 | Clostridiales      | 159779 | 2658708 |
| Sample_SPA21.mb.116cbin.1       | 54.70 | Bacteroidetes      | 63543  | 2054808 |
| Sample_SPA21.mb.26              | 60.80 | Clostridiales      | 33139  | 2204568 |
| Sample_SPA21.Cluster125cbin.1   | 58.60 | Clostridiales      | 105649 | 3845425 |
| Sample_SPA21.Cluster7969        | 41.10 | Lachnospiraceae    | 62809  | 3004411 |
| Sample_SPA21.mb.70cbin.1        | 59.60 | Clostridiales      | 23531  | 1820827 |
| Sample_SPA21.Cluster9049cbin.1  | 37.50 | Clostridiales      | 100921 | 2803130 |
| Sample_SPA21.mb.75cbin.1        | 61.00 | Clostridiales      | 44394  | 2031201 |
| Sample_SPA21.mb.118cbin.1       | 41.60 | Lachnospiraceae    | 61315  | 2869050 |
| Sample_SPA21.mb.11              | 43.60 | Clostridiales      | 20429  | 3397106 |
| Sample_SPA21.mb.37cbin.1        | 58.90 | Bacteroidetes      | 92557  | 3006221 |
| Sample_SPA21.mb.13cbin.1        | 49.30 | Proteobacteria     | 57000  | 2066745 |
| Sample_SPA21.mb.121             | 44.90 | Bacteroidales      | 11411  | 2823245 |
| Sample_SPA21.mb.53              | 29.70 | Bacteria           | 47786  | 2501128 |
| Sample_SPA21.mb.124             | 49.30 | Lachnospiraceae    | 95562  | 3099360 |

|                                 |       |                 |        |         |
|---------------------------------|-------|-----------------|--------|---------|
| Sample_SPA21.mb.61              | 44.10 | Clostridiales   | 64644  | 3000328 |
| Sample_SPA21.mb.76              | 63.40 | Actinobacteria  | 36625  | 2677538 |
| Sample_SPA21.mb.84              | 60.50 | Bacteroidetes   | 18798  | 2562134 |
| Sample_SPA21.mb.39cbin.1        | 48.60 | Bacteroidales   | 112383 | 3398257 |
| Sample_SPA21.mb.79              | 43.80 | Bacteroidales   | 10908  | 2515676 |
| Sample_SPA21.mb.2               | 46.70 | Bacteroidales   | 76036  | 4000633 |
| Sample_SPA21.mb.114cbin.1       | 41.50 | Bacteroidales   | 213652 | 4942244 |
| Sample_SPA21.mb.41cbin.1        | 45.30 | Bacteroidales   | 42092  | 4090504 |
| Sample_SPA21.mb.60              | 45.00 | Bacteroidales   | 146994 | 4612489 |
| Sample_SPA22.Cluster19998       | 24.00 | Bacteria        | 63835  | 976686  |
| Sample_SPA22.Cluster19730       | 29.60 | Bacteria        | 141689 | 1246104 |
| Sample_SPA22.Cluster13759       | 34.90 | Bacteria        | 69807  | 1486345 |
| Sample_SPA22.Cluster19925       | 28.40 | Bacteria        | 470066 | 1672206 |
| Sample_SPA22.Cluster10053       | 45.20 | Clostridiales   | 154949 | 1685236 |
| Sample_SPA22.Cluster10703cbin.1 | 43.80 | Clostridiales   | 24817  | 1816224 |
| Sample_SPA22.Cluster19293cbin.1 | 32.20 | Bacteria        | 142830 | 1843180 |
| Sample_SPA22.mb.10cbin.1        | 59.20 | Bacteria        | 37679  | 2344591 |
| Sample_SPA22.Cluster18334cbin.1 | 42.10 | Lachnospiraceae | 8002   | 1772393 |
| Sample_SPA22.mb.108cbin.1       | 53.70 | Clostridia      | 29574  | 1834606 |
| Sample_SPA22.mb.21              | 26.70 | Bacteria        | 114372 | 1264330 |
| Sample_SPA22.Cluster358cbin.1   | 59.30 | Clostridiales   | 38319  | 2186957 |
| Sample_SPA22.mb.37              | 52.90 | Clostridia      | 31019  | 1959131 |
| Sample_SPA22.mb.28cbin.1        | 59.50 | Clostridiales   | 119372 | 2121908 |
| Sample_SPA22.Cluster926cbin.1   | 57.10 | Clostridiales   | 95739  | 1930753 |
| Sample_SPA22.Cluster221cbin.1   | 59.00 | Bacteria        | 10638  | 2524815 |
| Sample_SPA22.mb.14cbin.1        | 62.20 | Clostridiales   | 8763   | 1420891 |
| Sample_SPA22.Cluster14389cbin.1 | 37.30 | Clostridiales   | 86303  | 2392240 |
| Sample_SPA22.mb.8               | 27.20 | Bacteria        | 116011 | 1138812 |
| Sample_SPA22.Cluster14174cbin.1 | 43.40 | Lachnospiraceae | 21546  | 2890974 |
| Sample_SPA22.Cluster8559        | 47.10 | Selenomonadales | 90692  | 2236051 |
| Sample_SPA22.mb.4               | 57.60 | Clostridiales   | 72686  | 2263071 |
| Sample_SPA22.mb.120             | 60.70 | Clostridiales   | 26313  | 2255917 |
| Sample_SPA22.mb.32cbin.1        | 60.30 | Actinobacteria  | 15198  | 2084383 |
| Sample_SPA22.mb.36              | 45.60 | Clostridiales   | 54920  | 2077862 |
| Sample_SPA22.mb.91              | 28.00 | Clostridiales   | 51840  | 1359696 |
| Sample_SPA22.mb.2cbin.1         | 54.60 | Bacteroidetes   | 80367  | 2033747 |
| Sample_SPA22.Cluster1203cbin.1  | 55.30 | Proteobacteria  | 19258  | 2719121 |
| Sample_SPA22.mb.77              | 33.30 | Clostridiales   | 165981 | 2594642 |
| Sample_SPA22.mb.122             | 44.60 | Clostridiales   | 138546 | 2298223 |
| Sample_SPA22.mb.58              | 59.50 | Clostridiales   | 104599 | 2313118 |
| Sample_SPA22.mb.96              | 56.20 | Clostridiales   | 11522  | 2027989 |
| Sample_SPA22.mb.53              | 50.70 | Clostridiales   | 13327  | 2529954 |
| Sample_SPA22.mb.82              | 56.60 | Clostridiales   | 76907  | 2140493 |
| Sample_SPA22.Cluster14732cbin.1 | 41.80 | Bacteroidales   | 53964  | 4727282 |
| Sample_SPA22.mb.84              | 29.90 | Bacteria        | 11762  | 2338726 |
| Sample_SPA22.mb.93              | 51.40 | Clostridiales   | 129010 | 2176206 |
| Sample_SPA22.mb.98cbin.1        | 60.20 | Bacteroidetes   | 33016  | 2336389 |
| Sample_SPA22.mb.41              | 43.40 | Bacteroidales   | 124265 | 3173758 |
| Sample_SPA22.mb.110             | 46.30 | Bacteroidales   | 36659  | 3749969 |
| Sample_SPA25.Cluster129cbin.1   | 62.10 | Bacteria        | 13527  | 1724423 |
| Sample_SPA25.Cluster3919cbin.1  | 53.00 | Clostridia      | 58781  | 2103243 |
| Sample_SPA25.Cluster11307       | 32.80 | Bacteria        | 168813 | 1838261 |
| Sample_SPA25.Cluster5997        | 45.10 | Actinobacteria  | 143482 | 1940661 |
| Sample_SPA25.Cluster1390cbin.1  | 57.90 | Clostridiales   | 7663   | 2218341 |
| Sample_SPA25.Cluster3488        | 49.80 | Clostridiales   | 177106 | 2076509 |
| Sample_SPA25.mb.57cbin.1        | 47.20 | Clostridiales   | 22588  | 2025557 |
| Sample_SPA25.Cluster557         | 59.50 | Actinobacteria  | 89277  | 1957392 |
| Sample_SPA25.mb.13cbin.1        | 61.70 | Clostridiales   | 11425  | 2149300 |



|                                 |       |                     |        |         |
|---------------------------------|-------|---------------------|--------|---------|
| Sample_SPA25.mb.30cbin.1        | 62.10 | Clostridiales       | 59686  | 1835981 |
| Sample_SPA25.mb.42              | 57.60 | Clostridiales       | 13060  | 1955280 |
| Sample_SPA25.mb.68              | 58.00 | Clostridiales       | 51217  | 3010250 |
| Sample_SPA25.Cluster9308        | 38.90 | Clostridiales       | 86935  | 1905201 |
| Sample_SPA25.Cluster26cbin.1    | 60.40 | Bifidobacteriaceae  | 7766   | 1902222 |
| Sample_SPA25.Cluster3311cbin.1  | 51.40 | Clostridiales       | 176093 | 2178502 |
| Sample_SPA25.Cluster1972        | 55.50 | Bacteria            | 183896 | 2660793 |
| Sample_SPA25.Cluster5883        | 43.70 | Lactobacillales     | 41411  | 2033797 |
| Sample_SPA25.mb.7cbin.1         | 57.80 | Clostridiales       | 49100  | 2715782 |
| Sample_SPA25.mb.41              | 60.20 | Bacteroidetes       | 32233  | 2654590 |
| Sample_SPA25.mb.45cbin.1        | 35.90 | Clostridiales       | 10280  | 2326795 |
| Sample_SPA25.mb.23cbin.1        | 48.30 | Lachnospiraceae     | 72048  | 6704437 |
| Sample_SPA25.mb.71              | 63.50 | Actinobacteria      | 39648  | 2633489 |
| Sample_SPA25.mb.28              | 41.80 | Lachnospiraceae     | 69236  | 2262547 |
| Sample_SPA25.mb.86              | 58.60 | Bacteroidetes       | 256183 | 2358979 |
| Sample_SPA25.mb.92cbin.1        | 54.50 | Bacteroidetes       | 97991  | 2188818 |
| Sample_SPA25.mb.46cbin.1        | 61.90 | Deltaproteobacteria | 25397  | 3242802 |
| Sample_SPA25.Cluster4646cbin.1  | 46.40 | Bacteroidales       | 150608 | 3764981 |
| Sample_SPA25.mb.81              | 41.70 | Lachnospiraceae     | 93806  | 2512917 |
| Sample_SPA25.mb.6cbin.1         | 58.40 | Bacteroidetes       | 204544 | 3132296 |
| Sample_SPA25.mb.99              | 44.90 | Clostridiales       | 55525  | 2243153 |
| Sample_SPA25.mb.95              | 43.40 | Bacteroidales       | 207057 | 3081719 |
| Sample_SPA26.Cluster15006       | 26.00 | Bacteria            | 89564  | 1155319 |
| Sample_SPA26.mb.104             | 26.60 | Bacteria            | 108281 | 1318025 |
| Sample_SPA26.Cluster14380cbin.1 | 32.10 | Bacteria            | 33214  | 1940008 |
| Sample_SPA26.Cluster6968cbin.1  | 48.10 | Clostridiales       | 74460  | 1732252 |
| Sample_SPA26.mb.36              | 25.20 | Bacteria            | 149859 | 1262201 |
| Sample_SPA26.Cluster48cbin.1    | 62.20 | Clostridiales       | 15003  | 1661160 |
| Sample_SPA26.mb.17              | 49.40 | Clostridiales       | 75375  | 1914988 |
| Sample_SPA26.Cluster2066        | 54.50 | Clostridiales       | 103791 | 2092136 |
| Sample_SPA26.Cluster2008cbin.1  | 49.10 | Bacteroidales       | 8368   | 2313632 |
| Sample_SPA26.mb.133             | 60.30 | Clostridiales       | 80697  | 1910379 |
| Sample_SPA26.Cluster4054cbin.1  | 48.30 | Bacteroidales       | 53876  | 2466801 |
| Sample_SPA26.mb.20cbin.1        | 57.00 | Clostridiales       | 44973  | 1901491 |
| Sample_SPA26.Cluster5890cbin.1  | 47.10 | Proteobacteria      | 25623  | 1795808 |
| Sample_SPA26.Cluster4627cbin.1  | 51.10 | Firmicutes          | 38707  | 2229738 |
| Sample_SPA26.Cluster1527cbin.1  | 57.90 | Proteobacteria      | 15181  | 2101720 |
| Sample_SPA26.mb.130cbin.1       | 55.40 | Clostridiales       | 22912  | 3243913 |
| Sample_SPA26.Cluster12075       | 40.80 | Clostridiales       | 165279 | 2672824 |
| Sample_SPA26.mb.30              | 45.10 | Clostridiales       | 47176  | 2457582 |
| Sample_SPA26.Cluster751         | 59.40 | Bifidobacteriaceae  | 262553 | 2157017 |
| Sample_SPA26.mb.27              | 59.80 | Actinobacteria      | 79935  | 2250434 |
| Sample_SPA26.Cluster9645        | 44.40 | Clostridiales       | 180423 | 2354665 |
| Sample_SPA26.mb.13cbin.1        | 51.40 | Clostridiales       | 215002 | 2207154 |
| Sample_SPA26.mb.79              | 58.10 | Clostridia          | 36708  | 3127134 |
| Sample_SPA26.mb.50              | 60.60 | Clostridiales       | 37178  | 2579865 |
| Sample_SPA26.mb.95              | 38.60 | Clostridiales       | 5478   | 1815824 |
| Sample_SPA26.Cluster986         | 58.80 | Bacteroidetes       | 177259 | 2784790 |
| Sample_SPA26.mb.23cbin.1        | 50.90 | Bacteroidales       | 114719 | 2190235 |
| Sample_SPA26.Cluster10164cbin.1 | 41.50 | Lachnospiraceae     | 54923  | 2601045 |
| Sample_SPA26.mb.45              | 53.00 | Clostridiales       | 250215 | 1930643 |
| Sample_SPA26.mb.15              | 44.90 | Selenomonadales     | 120572 | 2073637 |
| Sample_SPA26.mb.57cbin.1        | 45.70 | Clostridiales       | 35088  | 2344427 |
| Sample_SPA26.mb.37              | 61.90 | Proteobacteria      | 16419  | 2252418 |
| Sample_SPA26.mb.54              | 59.80 | Bacteroidetes       | 146084 | 2421623 |
| Sample_SPA26.mb.83              | 55.10 | Bacteroidetes       | 42477  | 1884376 |
| Sample_SPA26.mb.78              | 47.80 | Clostridiales       | 122667 | 1861059 |
| Sample_SPA26.mb.80cbin.1        | 38.60 | Clostridiales       | 70075  | 2287255 |

|                                |       |                    |        |         |
|--------------------------------|-------|--------------------|--------|---------|
| Sample_SPA26.mb.89cbin.1       | 46.00 | Prevotella         | 13054  | 2849469 |
| Sample_SPA26.mb.74cbin.1       | 43.40 | Bacteroidales      | 21257  | 3053643 |
| Sample_SPA26.mb.59             | 49.00 | Bacteroidales      | 42155  | 3335532 |
| Sample_SPA26.mb.90             | 43.30 | Bacteria           | 33120  | 3905712 |
| Sample_SPA26.Cluster3042cbin.1 | 57.50 | Enterobacteriaceae | 129545 | 5034037 |
| Sample_SPA27.Cluster2470cbin.1 | 41.90 | Clostridiales      | 48045  | 2656072 |
| Sample_SPA27.Cluster1062cbin.1 | 48.30 | Clostridiales      | 81055  | 2841220 |
| Sample_SPA27.mb.21cbin.1       | 61.20 | Clostridiales      | 20139  | 2497991 |
| Sample_SPA27.mb.27cbin.1       | 56.70 | Clostridiales      | 6302   | 2085307 |
| Sample_SPA27.Cluster283        | 54.90 | Bacteroidetes      | 106277 | 1980805 |
| Sample_SPA27.Cluster79cbin.1   | 56.90 | Bifidobacteriaceae | 8095   | 1573180 |
| Sample_SPA27.Cluster925cbin.1  | 44.10 | Selenomonadales    | 12102  | 2175519 |
| Sample_SPA27.Cluster1827cbin.1 | 44.00 | Clostridiales      | 92109  | 3296193 |
| Sample_SPA27.Cluster213cbin.1  | 57.10 | Clostridiales      | 45453  | 2434226 |
| Sample_SPA27.Cluster2653cbin.1 | 41.10 | Lachnospiraceae    | 86525  | 2988052 |
| Sample_SPA27.Cluster135cbin.1  | 57.10 | Clostridiales      | 48499  | 2779142 |
| Sample_SPA27.mb.37             | 43.50 | Clostridiales      | 11545  | 3327489 |
| Sample_SPA27.mb.19             | 41.80 | Lachnospiraceae    | 23755  | 2361572 |
| Sample_SPA27.Cluster2782cbin.1 | 40.60 | Lachnospiraceae    | 61295  | 3600625 |
| Sample_SPA27.Cluster943        | 44.10 | Bacteroidales      | 90193  | 3848802 |
| Sample_SPA27.mb.1              | 45.30 | Bacteroidales      | 83565  | 3828891 |
| Sample_SPA27.mb.26             | 41.30 | Clostridiales      | 29403  | 3758405 |
| Sample_SPA27.Cluster2785cbin.1 | 41.80 | Bacteroidales      | 43078  | 3935661 |
| Sample_SPA27.mb.25             | 45.20 | Bacteroidales      | 57457  | 4202289 |
| Sample_SPA27.Cluster632cbin.1  | 51.00 | Enterobacteriaceae | 108381 | 4155652 |
| Sample_SPA28.Cluster10584      | 27.00 | Bacteria           | 125583 | 1419869 |
| Sample_SPA28.Cluster9686cbin.1 | 33.40 | Clostridiales      | 16094  | 1990579 |
| Sample_SPA28.mb.87             | 55.10 | Bacteria           | 17426  | 2022510 |
| Sample_SPA28.mb.17cbin.1       | 61.10 | Clostridiales      | 8364   | 1596446 |
| Sample_SPA28.mb.61             | 58.50 | Clostridiales      | 7180   | 2606906 |
| Sample_SPA28.mb.27             | 43.30 | Clostridiales      | 40300  | 2979519 |
| Sample_SPA28.mb.19             | 58.00 | Clostridiales      | 30672  | 2177356 |
| Sample_SPA28.mb.57             | 36.30 | Clostridiales      | 97746  | 2488731 |
| Sample_SPA28.Cluster5010       | 45.10 | Clostridiales      | 107887 | 2594843 |
| Sample_SPA28.mb.77             | 38.00 | Clostridiales      | 10664  | 2306720 |
| Sample_SPA28.Cluster35cbin.1   | 60.90 | Clostridiales      | 6728   | 2085753 |
| Sample_SPA28.Cluster9763cbin.1 | 33.50 | Bacteria           | 43832  | 2247509 |
| Sample_SPA28.mb.51             | 41.90 | Lachnospiraceae    | 49585  | 2108701 |
| Sample_SPA28.Cluster3006cbin.1 | 49.30 | Bacteroidales      | 141255 | 2865127 |
| Sample_SPA28.Cluster5286       | 43.90 | Clostridiales      | 256324 | 2000320 |
| Sample_SPA28.mb.52             | 46.10 | Clostridiales      | 40794  | 2151995 |
| Sample_SPA28.mb.20cbin.1       | 48.50 | Firmicutes         | 29980  | 1937632 |
| Sample_SPA28.mb.24cbin.1       | 46.60 | Clostridiales      | 102272 | 2716039 |
| Sample_SPA28.Cluster8696cbin.1 | 38.60 | Clostridiales      | 80944  | 2133615 |
| Sample_SPA28.Cluster117        | 60.10 | Bifidobacteriaceae | 17404  | 2173633 |
| Sample_SPA28.Cluster5599       | 42.00 | Lachnospiraceae    | 5749   | 1902476 |
| Sample_SPA28.mb.83cbin.1       | 48.20 | Clostridiales      | 17063  | 2938189 |
| Sample_SPA28.Cluster6267cbin.1 | 43.40 | Lachnospiraceae    | 82860  | 2953114 |
| Sample_SPA28.Cluster9539       | 35.90 | Clostridiales      | 193311 | 2532633 |
| Sample_SPA28.mb.21cbin.1       | 56.30 | Bifidobacteriaceae | 52656  | 2069606 |
| Sample_SPA28.mb.70cbin.1       | 56.50 | Clostridiales      | 14765  | 2383421 |
| Sample_SPA28.mb.64             | 41.20 | Clostridiales      | 337782 | 2690735 |
| Sample_SPA28.mb.69             | 44.70 | Clostridiales      | 65228  | 2397035 |
| Sample_SPA28.mb.8cbin.1        | 31.60 | Firmicutes         | 32318  | 2160528 |
| Sample_SPA28.mb.37             | 47.90 | Bacteroidales      | 15269  | 3410055 |
| Sample_SPA28.mb.73cbin.1       | 58.30 | Enterobacteriaceae | 9746   | 4307245 |
| Sample_SPA30.Cluster12070      | 27.60 | Bacteria           | 669807 | 1263085 |
| Sample_SPA30.mb.13             | 38.10 | Clostridiales      | 182156 | 1881398 |

|                                 |       |                    |        |         |
|---------------------------------|-------|--------------------|--------|---------|
| Sample_SPA30.mb.27              | 44.10 | Clostridiales      | 63082  | 2582096 |
| Sample_SPA30.Cluster444cbin.1   | 58.70 | Clostridiales      | 61004  | 2069272 |
| Sample_SPA30.mb.100             | 62.10 | Clostridiales      | 177617 | 2017670 |
| Sample_SPA30.Cluster87cbin.1    | 61.10 | Clostridiales      | 47014  | 2193584 |
| Sample_SPA30.Cluster1140cbin.1  | 53.20 | Clostridiales      | 40141  | 2327585 |
| Sample_SPA30.Cluster372cbin.1   | 60.90 | Clostridiales      | 47770  | 2281365 |
| Sample_SPA30.mb.41              | 58.40 | Clostridiales      | 62266  | 2873253 |
| Sample_SPA30.mb.22              | 60.70 | Clostridiales      | 63247  | 1679527 |
| Sample_SPA30.Cluster5439        | 45.40 | Selenomonadales    | 282348 | 1947730 |
| Sample_SPA30.Cluster218cbin.1   | 60.50 | Clostridiales      | 33901  | 2380106 |
| Sample_SPA30.Cluster6069        | 43.50 | Selenomonadales    | 267532 | 2478522 |
| Sample_SPA30.Cluster10669cbin.1 | 36.10 | Clostridiales      | 5778   | 2094232 |
| Sample_SPA30.mb.25              | 58.50 | Bacteroidetes      | 49609  | 2374424 |
| Sample_SPA30.Cluster371cbin.1   | 55.70 | Bacteria           | 202516 | 2750401 |
| Sample_SPA30.mb.102cbin.1       | 49.70 | Clostridiales      | 105329 | 2408085 |
| Sample_SPA30.Cluster5550cbin.1  | 45.20 | Prevotella         | 54790  | 3274496 |
| Sample_SPA30.Cluster7309cbin.1  | 42.80 | Clostridiales      | 81823  | 2751574 |
| Sample_SPA30.Cluster3188cbin.1  | 55.50 | Proteobacteria     | 13292  | 2599541 |
| Sample_SPA30.Cluster11505cbin.1 | 31.30 | Firmicutes         | 47874  | 2268695 |
| Sample_SPA30.Cluster4953        | 46.20 | Bacteroidales      | 86774  | 3336394 |
| Sample_SPA30.mb.63cbin.1        | 39.30 | Clostridiales      | 71202  | 1993740 |
| Sample_SPA30.mb.80              | 45.70 | Clostridiales      | 11529  | 2125366 |
| Sample_SPA30.mb.50              | 42.50 | Bacteroidales      | 51034  | 3641968 |
| Sample_SPA30.Cluster6094        | 45.40 | Bacteroidales      | 206009 | 4004383 |
| Sample_SPA30.mb.14cbin.1        | 42.00 | Bacteroidales      | 68323  | 4783866 |
| Sample_SPA31.Cluster8294cbin.1  | 26.00 | Bacteria           | 35677  | 1230259 |
| Sample_SPA31.mb.47              | 26.60 | Bacteria           | 60742  | 1314590 |
| Sample_SPA31.mb.15              | 59.90 | Clostridia         | 16990  | 2406300 |
| Sample_SPA31.mb.57cbin.1        | 53.70 | Clostridia         | 19487  | 1764351 |
| Sample_SPA31.Cluster1487cbin.1  | 57.60 | Clostridiales      | 6217   | 2058962 |
| Sample_SPA31.mb.11cbin.1        | 57.50 | Clostridiales      | 46510  | 1851960 |
| Sample_SPA31.mb.74              | 49.50 | Clostridiales      | 43945  | 1898322 |
| Sample_SPA31.Cluster403cbin.1   | 59.80 | Actinobacteria     | 44035  | 2057372 |
| Sample_SPA31.Cluster110         | 60.00 | Bacteria           | 39552  | 2423573 |
| Sample_SPA31.mb.69              | 61.80 | Clostridiales      | 38365  | 1651571 |
| Sample_SPA31.Cluster5253cbin.1  | 43.70 | Clostridiales      | 82220  | 2069793 |
| Sample_SPA31.Cluster2324cbin.1  | 51.20 | Clostridiales      | 28594  | 2018948 |
| Sample_SPA31.mb.40              | 54.50 | Bacteroidetes      | 58131  | 2033380 |
| Sample_SPA31.mb.45cbin.1        | 41.00 | Clostridiales      | 14048  | 1886177 |
| Sample_SPA31.Cluster4489cbin.1  | 46.40 | Clostridiales      | 56441  | 2497483 |
| Sample_SPA31.mb.62              | 57.20 | Clostridiales      | 53766  | 2541410 |
| Sample_SPA31.Cluster5882cbin.1  | 44.40 | Clostridiales      | 142979 | 2327986 |
| Sample_SPA31.Cluster7476        | 32.70 | Lactobacillales    | 28095  | 1944481 |
| Sample_SPA31.Cluster6198        | 43.00 | Clostridiales      | 109811 | 2575166 |
| Sample_SPA31.mb.79cbin.1        | 57.50 | Clostridiales      | 18143  | 3126127 |
| Sample_SPA31.mb.83              | 58.60 | Bacteroidetes      | 218153 | 2261497 |
| Sample_SPA31.mb.2cbin.1         | 41.50 | Lachnospiraceae    | 86974  | 2972960 |
| Sample_SPA31.mb.68              | 58.30 | Bacteroidetes      | 155697 | 3081482 |
| Sample_SPA31.mb.7cbin.1         | 37.20 | Bacteria           | 39578  | 3090226 |
| Sample_SPA31.mb.60cbin.1        | 48.10 | Clostridiales      | 43785  | 6408952 |
| Sample_SPA31.Cluster5757        | 43.00 | Bacteroidales      | 142931 | 5103494 |
| Sample_SPA31.mb.67              | 45.00 | Bacteroidales      | 72442  | 4585176 |
| Sample_SPA31.mb.82cbin.1        | 50.50 | Enterobacteriaceae | 142264 | 4952928 |
| Sample_SPA31.mb.56cbin.1        | 57.50 | Enterobacteriaceae | 43715  | 5157157 |
| Sample_SPA32.mb.10              | 47.50 | Bacteria           | 60107  | 1627327 |
| Sample_SPA32.Cluster8317cbin.1  | 33.50 | Clostridiales      | 351073 | 2154330 |
| Sample_SPA32.Cluster6554        | 37.20 | Clostridiales      | 120880 | 2451398 |
| Sample_SPA32.Cluster5430cbin.1  | 42.00 | Clostridiales      | 78943  | 2838312 |

|                                 |       |                    |        |         |
|---------------------------------|-------|--------------------|--------|---------|
| Sample_SPA32.mb.41cbin.1        | 37.20 | Clostridiales      | 8725   | 2276644 |
| Sample_SPA32.Cluster831cbin.1   | 55.00 | Clostridiales      | 84132  | 2476258 |
| Sample_SPA32.Cluster3859        | 45.20 | Lachnospiraceae    | 154767 | 2213449 |
| Sample_SPA32.Cluster1745        | 48.80 | Clostridiales      | 84766  | 2600811 |
| Sample_SPA32.mb.13              | 40.00 | Lachnospiraceae    | 45164  | 2580181 |
| Sample_SPA32.mb.59cbin.1        | 38.40 | Clostridiales      | 25927  | 2532225 |
| Sample_SPA32.mb.79cbin.1        | 34.30 | Bacilli            | 14509  | 2353966 |
| Sample_SPA32.Cluster317cbin.1   | 58.50 | Bifidobacteriaceae | 49512  | 2367668 |
| Sample_SPA32.mb.58cbin.1        | 49.70 | Clostridiales      | 17314  | 2734059 |
| Sample_SPA32.mb.80              | 62.20 | Clostridiales      | 43792  | 1960763 |
| Sample_SPA32.mb.53              | 46.90 | Lachnospiraceae    | 64669  | 3221421 |
| Sample_SPA32.mb.2cbin.1         | 40.90 | Clostridiales      | 23318  | 2629890 |
| Sample_SPA32.mb.21              | 44.90 | Clostridiales      | 70438  | 2739142 |
| Sample_SPA32.mb.29cbin.1        | 62.70 | Clostridiales      | 43190  | 3205824 |
| Sample_SPA32.mb.57              | 59.60 | Bacteroidetes      | 154602 | 2793928 |
| Sample_SPA32.mb.67cbin.1        | 57.80 | Proteobacteria     | 12784  | 2128602 |
| Sample_SPA32.Cluster37cbin.1    | 64.60 | Actinobacteria     | 12080  | 3101466 |
| Sample_SPA32.mb.35              | 45.10 | Clostridiales      | 47883  | 3563281 |
| Sample_SPA32.mb.99cbin.1        | 54.50 | Bacteroidetes      | 179563 | 2073776 |
| Sample_SPA32.mb.75              | 41.90 | Clostridiales      | 16123  | 2877196 |
| Sample_SPA32.mb.92              | 60.30 | Actinobacteria     | 14716  | 3550702 |
| Sample_SPA32.mb.55cbin.1        | 45.00 | Bacteroidales      | 167726 | 4542900 |
| Sample_SPA34.Cluster14210       | 26.00 | Bacteria           | 41153  | 1113366 |
| Sample_SPA34.Cluster14283cbin.1 | 26.60 | Bacteria           | 82738  | 1254767 |
| Sample_SPA34.Cluster13844       | 32.70 | Bacteria           | 141455 | 1908957 |
| Sample_SPA34.Cluster13142cbin.1 | 33.40 | Clostridiales      | 21626  | 2113815 |
| Sample_SPA34.Cluster236cbin.1   | 61.80 | Clostridiales      | 33662  | 1710130 |
| Sample_SPA34.Cluster5308cbin.1  | 48.60 | Clostridiales      | 19831  | 2599641 |
| Sample_SPA34.Cluster10977cbin.1 | 41.10 | Clostridiales      | 24120  | 3485799 |
| Sample_SPA34.mb.100             | 57.00 | Clostridiales      | 78299  | 1981110 |
| Sample_SPA34.Cluster2863        | 54.70 | Bacteroidetes      | 147329 | 1926949 |
| Sample_SPA34.mb.104             | 58.60 | Clostridiales      | 40905  | 2074494 |
| Sample_SPA34.Cluster3950cbin.1  | 53.70 | Clostridiales      | 148801 | 1912281 |
| Sample_SPA34.mb.10cbin.1        | 57.60 | Clostridiales      | 90884  | 2602322 |
| Sample_SPA34.mb.27cbin.1        | 48.10 | Clostridiales      | 28637  | 1968618 |
| Sample_SPA34.Cluster1738cbin.1  | 56.10 | Proteobacteria     | 16235  | 2026869 |
| Sample_SPA34.mb.47              | 49.50 | Clostridiales      | 8760   | 1696969 |
| Sample_SPA34.Cluster2567        | 55.50 | Bacteria           | 117958 | 2769751 |
| Sample_SPA34.mb.57cbin.1        | 53.60 | Clostridia         | 19356  | 1838666 |
| Sample_SPA34.Cluster8839        | 44.50 | Clostridiales      | 205321 | 2590812 |
| Sample_SPA34.mb.106cbin.1       | 44.60 | Clostridiales      | 7073   | 1911250 |
| Sample_SPA34.Cluster10225       | 41.70 | Lachnospiraceae    | 104159 | 2510340 |
| Sample_SPA34.mb.105cbin.1       | 39.50 | Clostridiales      | 95811  | 2003690 |
| Sample_SPA34.mb.113             | 37.90 | Clostridiales      | 166419 | 1811794 |
| Sample_SPA34.mb.40              | 59.80 | Clostridiales      | 62317  | 2310987 |
| Sample_SPA34.mb.21              | 52.70 | Firmicutes         | 13015  | 1956650 |
| Sample_SPA34.Cluster17cbin.1    | 64.40 | Actinobacteria     | 10914  | 2976498 |
| Sample_SPA34.mb.55              | 32.20 | Euryarchaeota      | 6035   | 1241499 |
| Sample_SPA34.mb.62              | 61.30 | Clostridiales      | 21379  | 1969649 |
| Sample_SPA34.mb.102             | 59.30 | Bacteroidetes      | 196370 | 2811224 |
| Sample_SPA34.mb.93              | 59.30 | Clostridiales      | 86756  | 1930968 |
| Sample_SPA34.mb.53              | 60.40 | Clostridiales      | 25327  | 2358707 |
| Sample_SPA34.mb.94cbin.1        | 58.10 | Clostridiales      | 36111  | 3058801 |
| Sample_SPA34.mb.83              | 53.80 | Clostridiales      | 17053  | 1801481 |
| Sample_SPA34.mb.72cbin.1        | 55.60 | Clostridiales      | 43990  | 2637640 |
| Sample_SPA34.Cluster4722cbin.1  | 45.60 | Bacteroidales      | 16189  | 3954405 |
| Sample_SPA34.Cluster6895cbin.1  | 46.40 | Bacteroidales      | 127079 | 4185940 |
| Sample_SPA34.mb.79              | 50.00 | Clostridiales      | 11024  | 1598422 |

|                                 |       |                    |        |         |
|---------------------------------|-------|--------------------|--------|---------|
| Sample_SPA34.Cluster8898cbin.1  | 42.10 | Bacteroidales      | 43518  | 4144680 |
| Sample_SPA34.mb.90cbin.1        | 46.00 | Lachnospiraceae    | 63997  | 3084305 |
| Sample_SPA34.mb.92              | 44.20 | Clostridiales      | 84011  | 2827970 |
| Sample_SPA34.mb.97              | 46.10 | Clostridiales      | 24035  | 2523493 |
| Sample_SPA34.mb.56cbin.1        | 43.30 | Bacteria           | 61492  | 4377478 |
| Sample_SPA34.mb.61cbin.1        | 41.40 | Bacteroidales      | 141982 | 4907501 |
| Sample_SPA34.Cluster1818        | 55.10 | Enterobacteriaceae | 222287 | 5674361 |
| Sample_SPA35.Cluster18259       | 25.30 | Bacteria           | 55047  | 1291561 |
| Sample_SPA35.Cluster17834cbin.1 | 28.10 | Clostridiales      | 96193  | 1371900 |
| Sample_SPA35.Cluster14601       | 37.00 | Clostridiales      | 101975 | 2539597 |
| Sample_SPA35.Cluster14221cbin.1 | 42.00 | Clostridiales      | 24079  | 2217781 |
| Sample_SPA35.mb.100cbin.1       | 54.00 | Clostridia         | 10450  | 1702554 |
| Sample_SPA35.Cluster9708        | 46.60 | Clostridiales      | 269483 | 1534256 |
| Sample_SPA35.mb.113             | 51.60 | Bacteria           | 14843  | 1722060 |
| Sample_SPA35.Cluster432         | 61.10 | Clostridiales      | 20253  | 1465161 |
| Sample_SPA35.mb.10              | 37.50 | Clostridiales      | 72580  | 1953254 |
| Sample_SPA35.mb.32              | 49.70 | Clostridia         | 15495  | 1300436 |
| Sample_SPA35.mb.22              | 51.30 | Clostridia         | 114940 | 1757649 |
| Sample_SPA35.Cluster16310cbin.1 | 33.40 | Bacteria           | 8330   | 1992879 |
| Sample_SPA35.mb.103cbin.1       | 59.80 | Clostridiales      | 16301  | 2264644 |
| Sample_SPA35.mb.47              | 45.50 | Clostridia         | 129867 | 1701670 |
| Sample_SPA35.Cluster13092       | 40.70 | Clostridiales      | 126103 | 1890979 |
| Sample_SPA35.Cluster1826cbin.1  | 54.00 | Prevotella         | 72319  | 2501628 |
| Sample_SPA35.mb.66              | 26.70 | Bacteria           | 16124  | 1324541 |
| Sample_SPA35.mb.46              | 58.60 | Clostridia         | 8275   | 2937177 |
| Sample_SPA35.Cluster4290cbin.1  | 51.90 | Clostridiales      | 16004  | 2034133 |
| Sample_SPA35.mb.50              | 56.90 | Clostridiales      | 7136   | 2417858 |
| Sample_SPA35.Cluster3665        | 55.60 | Bacteria           | 134847 | 2694577 |
| Sample_SPA35.mb.65cbin.1        | 52.80 | Clostridiales      | 6513   | 1872846 |
| Sample_SPA35.mb.71cbin.1        | 50.70 | Clostridiales      | 76275  | 1627088 |
| Sample_SPA35.mb.102cbin.1       | 40.60 | Clostridiales      | 80266  | 2722622 |
| Sample_SPA35.mb.30              | 59.80 | Actinobacteria     | 55529  | 2143999 |
| Sample_SPA35.mb.40cbin.1        | 58.00 | Clostridiales      | 23517  | 2130964 |
| Sample_SPA35.mb.49              | 57.10 | Clostridiales      | 47967  | 2448756 |
| Sample_SPA35.mb.58              | 53.60 | Clostridiales      | 12007  | 1834897 |
| Sample_SPA35.mb.23              | 30.90 | Euryarchaeota      | 105049 | 1765641 |
| Sample_SPA35.mb.3cbin.1         | 41.70 | Clostridiales      | 23478  | 1512710 |
| Sample_SPA35.mb.25              | 44.30 | Clostridiales      | 21053  | 2579650 |
| Sample_SPA35.mb.75cbin.1        | 49.30 | Clostridiales      | 9283   | 2249215 |
| Sample_SPA35.mb.114cbin.1       | 36.10 | Clostridiales      | 30131  | 2495389 |
| Sample_SPA35.mb.59              | 60.50 | Clostridiales      | 95773  | 2498279 |
| Sample_SPA35.mb.73              | 60.90 | Clostridiales      | 7488   | 2225068 |
| Sample_SPA35.mb.60cbin.1        | 59.50 | Bifidobacteriaceae | 381267 | 2166574 |
| Sample_SPA35.mb.87              | 46.50 | Clostridiales      | 9037   | 1889253 |
| Sample_SPA35.mb.93              | 54.50 | Proteobacteria     | 38400  | 2179732 |
| Sample_SPA35.mb.98cbin.1        | 59.90 | Bacteroidetes      | 6340   | 2619122 |
| Sample_SPA35.Cluster1466        | 57.50 | Enterobacteriaceae | 258187 | 5119623 |
| Sample_SPA36.Cluster12603       | 28.50 | Bacteria           | 306479 | 1685675 |
| Sample_SPA36.mb.2               | 53.40 | Clostridia         | 42934  | 1934928 |
| Sample_SPA36.Cluster108         | 61.90 | Clostridiales      | 143640 | 1766752 |
| Sample_SPA36.mb.40              | 34.40 | Clostridiales      | 25659  | 1996685 |
| Sample_SPA36.Cluster1221cbin.1  | 57.10 | Clostridiales      | 33983  | 1998370 |
| Sample_SPA36.mb.19cbin.1        | 49.00 | Clostridiales      | 6517   | 2239662 |
| Sample_SPA36.Cluster1524cbin.1  | 57.70 | Clostridiales      | 16840  | 1871950 |
| Sample_SPA36.Cluster1295cbin.1  | 56.60 | Clostridiales      | 51178  | 2478429 |
| Sample_SPA36.Cluster5207cbin.1  | 42.00 | Lachnospiraceae    | 31120  | 1991685 |
| Sample_SPA36.mb.61              | 58.60 | Clostridiales      | 8358   | 2590279 |
| Sample_SPA36.mb.20              | 62.80 | Clostridiales      | 19036  | 1861382 |

|                                 |       |                     |        |         |
|---------------------------------|-------|---------------------|--------|---------|
| Sample_SPA36.Cluster6225cbin.1  | 45.90 | Clostridiales       | 45926  | 2080602 |
| Sample_SPA36.mb.13cbin.1        | 52.30 | Clostridiales       | 86117  | 2258398 |
| Sample_SPA36.Cluster8708cbin.1  | 44.90 | Clostridiales       | 76405  | 2783342 |
| Sample_SPA36.Cluster10796       | 38.20 | Clostridiales       | 216611 | 1824821 |
| Sample_SPA36.Cluster5539cbin.1  | 43.40 | Lachnospiraceae     | 18962  | 2182120 |
| Sample_SPA36.Cluster12513       | 31.10 | Euryarchaeota       | 171206 | 1750944 |
| Sample_SPA36.Cluster3422        | 52.80 | Clostridiales       | 149474 | 2279671 |
| Sample_SPA36.mb.44cbin.1        | 60.00 | Clostridiales       | 106538 | 3215882 |
| Sample_SPA36.Cluster9710        | 40.60 | Clostridiales       | 172210 | 2159863 |
| Sample_SPA36.mb.62              | 59.00 | Bacteroidetes       | 5828   | 2157321 |
| Sample_SPA36.Cluster41          | 60.20 | Bifidobacteriaceae  | 143226 | 2315451 |
| Sample_SPA36.mb.31              | 41.20 | Clostridiales       | 193440 | 2569164 |
| Sample_SPA36.mb.28cbin.1        | 51.00 | Clostridiales       | 263620 | 2250977 |
| Sample_SPA36.mb.18cbin.1        | 44.90 | Clostridiales       | 47715  | 2789678 |
| Sample_SPA36.mb.27              | 57.80 | Bacteria            | 130106 | 3077734 |
| Sample_SPA36.mb.36              | 44.40 | Clostridiales       | 207336 | 2650383 |
| Sample_SPA36.Cluster10253cbin.1 | 44.80 | Prevotella          | 60293  | 3655228 |
| Sample_SPA36.Cluster1302cbin.1  | 56.10 | Clostridiales       | 17343  | 2725913 |
| Sample_SPA36.mb.43              | 57.90 | Clostridiales       | 28816  | 2128960 |
| Sample_SPA36.mb.7cbin.1         | 33.30 | Bacteria            | 10297  | 2238279 |
| Sample_SPA36.mb.68              | 46.90 | Selenomonadales     | 68917  | 2254505 |
| Sample_SPA36.mb.83cbin.1        | 31.30 | Firmicutes          | 63917  | 2209952 |
| Sample_SPA36.mb.81              | 45.00 | Bacteroidales       | 78786  | 4650896 |
| Sample_SPA37.Cluster17704       | 26.10 | Bacteria            | 58011  | 1155474 |
| Sample_SPA37.Cluster17805       | 25.20 | Bacteria            | 121525 | 1263841 |
| Sample_SPA37.mb.113             | 25.60 | Bacteria            | 135499 | 1234695 |
| Sample_SPA37.mb.2               | 53.20 | Clostridia          | 95066  | 1930303 |
| Sample_SPA37.mb.41              | 26.40 | Bacteria            | 52722  | 1163628 |
| Sample_SPA37.mb.25              | 49.50 | Clostridiales       | 74437  | 1935731 |
| Sample_SPA37.Cluster340cbin.1   | 59.50 | Clostridiales       | 8386   | 2004514 |
| Sample_SPA37.mb.32              | 45.10 | Clostridiales       | 132540 | 1749515 |
| Sample_SPA37.Cluster3961        | 54.70 | Bacteroidetes       | 76826  | 2070463 |
| Sample_SPA37.Cluster15419cbin.1 | 38.90 | Clostridiales       | 65284  | 2083064 |
| Sample_SPA37.mb.78cbin.1        | 53.80 | Clostridia          | 12810  | 1655664 |
| Sample_SPA37.Cluster6548        | 52.80 | Clostridiales       | 140924 | 2254914 |
| Sample_SPA37.mb.16cbin.1        | 48.50 | Firmicutes          | 32960  | 1792667 |
| Sample_SPA37.Cluster144cbin.1   | 58.70 | Clostridiales       | 8397   | 2173746 |
| Sample_SPA37.Cluster11952cbin.1 | 41.60 | Lachnospiraceae     | 7369   | 2479318 |
| Sample_SPA37.Cluster18          | 63.30 | Deltaproteobacteria | 10162  | 2382714 |
| Sample_SPA37.mb.61              | 56.60 | Clostridiales       | 55538  | 2376322 |
| Sample_SPA37.mb.69              | 37.90 | Clostridiales       | 49875  | 3453619 |
| Sample_SPA37.mb.1               | 44.70 | Clostridiales       | 18473  | 3055462 |
| Sample_SPA37.Cluster6932cbin.1  | 50.00 | Clostridiales       | 232233 | 5500404 |
| Sample_SPA37.mb.40              | 37.50 | Clostridiales       | 132372 | 2768859 |
| Sample_SPA37.mb.30              | 59.00 | Bacteroidetes       | 136387 | 2801498 |
| Sample_SPA37.mb.108cbin.1       | 41.60 | Lachnospiraceae     | 62520  | 2601171 |
| Sample_SPA37.mb.8               | 59.10 | Bacteroidetes       | 14646  | 2451438 |
| Sample_SPA37.Cluster8131cbin.1  | 42.20 | Bacteria            | 5702   | 4082404 |
| Sample_SPA37.mb.60cbin.1        | 40.80 | Lachnospiraceae     | 63471  | 3371928 |
| Sample_SPA37.mb.72              | 60.00 | Deltaproteobacteria | 21380  | 4091254 |
| Sample_SPA37.mb.75              | 43.70 | Bacteroidales       | 117422 | 3013339 |
| Sample_SPA37.Cluster15692cbin.1 | 42.00 | Bacteroides         | 106952 | 4931329 |
| Sample_SPA37.mb.11cbin.1        | 44.80 | Bacteroidales       | 15777  | 5242596 |
| Sample_SPA37.mb.94              | 50.70 | Enterobacteriaceae  | 112333 | 4655427 |
| Sample_SPA38.Cluster1699        | 57.20 | Clostridiales       | 29165  | 1904290 |
| Sample_SPA38.Cluster605         | 60.60 | Clostridiales       | 59460  | 1790279 |
| Sample_SPA38.Cluster9283cbin.1  | 41.10 | Clostridiales       | 23012  | 3200440 |
| Sample_SPA38.Cluster9cbin.1     | 59.60 | Clostridiales       | 9860   | 2010368 |

|                                 |       |                    |        |         |
|---------------------------------|-------|--------------------|--------|---------|
| Sample_SPA38.Cluster11102       | 40.60 | Clostridiales      | 227443 | 2023306 |
| Sample_SPA38.Cluster7150        | 43.50 | Selenomonadales    | 132582 | 2370209 |
| Sample_SPA38.Cluster647cbin.1   | 56.40 | Clostridiales      | 13764  | 2545059 |
| Sample_SPA38.Cluster3464        | 54.70 | Bacteroidetes      | 203576 | 2868338 |
| Sample_SPA38.mb.113             | 60.00 | Actinobacteria     | 37345  | 2152146 |
| Sample_SPA38.Cluster14202cbin.1 | 31.60 | Firmicutes         | 19579  | 2008573 |
| Sample_SPA38.mb.101cbin.1       | 38.90 | Clostridiales      | 70916  | 2228696 |
| Sample_SPA38.mb.26cbin.1        | 48.50 | Clostridiales      | 22627  | 2608876 |
| Sample_SPA38.mb.133             | 54.60 | Bacteroidetes      | 91325  | 1935582 |
| Sample_SPA38.Cluster11496cbin.1 | 41.90 | Lachnospiraceae    | 10031  | 2856654 |
| Sample_SPA38.mb.134             | 49.60 | Clostridiales      | 174728 | 1855382 |
| Sample_SPA38.Cluster8789cbin.1  | 41.80 | Lachnospiraceae    | 26222  | 2566845 |
| Sample_SPA38.mb.3cbin.1         | 59.90 | Clostridiales      | 48704  | 1896787 |
| Sample_SPA38.mb.57cbin.1        | 54.80 | Actinobacteria     | 13477  | 1448906 |
| Sample_SPA38.mb.88              | 47.10 | Bacteria           | 50435  | 1753252 |
| Sample_SPA38.Cluster5590cbin.1  | 48.80 | Bacteroidales      | 114282 | 3339910 |
| Sample_SPA38.mb.38              | 59.70 | Bacteroidetes      | 150781 | 2690304 |
| Sample_SPA38.mb.71cbin.1        | 61.90 | Clostridiales      | 37028  | 1949409 |
| Sample_SPA38.mb.103cbin.1       | 41.10 | Lachnospiraceae    | 79756  | 2850924 |
| Sample_SPA38.mb.66              | 61.30 | Clostridiales      | 14326  | 2035681 |
| Sample_SPA38.mb.70              | 38.30 | Clostridiales      | 8575   | 1615389 |
| Sample_SPA38.mb.40cbin.1        | 42.80 | Bacteroidales      | 71668  | 2482343 |
| Sample_SPA38.mb.87cbin.1        | 55.70 | Clostridiales      | 58829  | 2884890 |
| Sample_SPA38.mb.31cbin.1        | 43.30 | Bacteroidales      | 290315 | 3257656 |
| Sample_SPA38.mb.111cbin.1       | 45.20 | Bacteroidales      | 94758  | 4186124 |
| Sample_SPA38.mb.91              | 38.70 | Bacteroidales      | 146273 | 4265340 |
| Sample_SPA38.mb.74cbin.1        | 56.50 | Bifidobacteriaceae | 81449  | 2060387 |
| Sample_SPA38.mb.97cbin.1        | 63.50 | Actinobacteria     | 96933  | 2594464 |
| Sample_SPA38.mb.124cbin.1       | 45.10 | Bacteroidales      | 54725  | 4581078 |
| Sample_SPA38.mb.80cbin.1        | 44.80 | Bacteroidales      | 19919  | 2528653 |
| Sample_SPA38.mb.41cbin.1        | 46.30 | Bacteroidales      | 119451 | 3637197 |
| Sample_SPA38.mb.64              | 42.20 | Bacteroidales      | 31729  | 3695191 |
| Sample_SPA39.mb.115             | 26.70 | Bacteria           | 79873  | 1304752 |
| Sample_SPA39.Cluster11734cbin.1 | 33.70 | Clostridiales      | 93373  | 2146065 |
| Sample_SPA39.Cluster251cbin.1   | 60.50 | Clostridiales      | 122253 | 1944069 |
| Sample_SPA39.mb.108             | 57.80 | Bacteria           | 9752   | 1630901 |
| Sample_SPA39.Cluster4992        | 47.80 | Clostridiales      | 146711 | 2894877 |
| Sample_SPA39.Cluster569cbin.1   | 58.50 | Clostridiales      | 68307  | 2273555 |
| Sample_SPA39.mb.134             | 58.40 | Clostridiales      | 55952  | 2948357 |
| Sample_SPA39.Cluster11372cbin.1 | 33.30 | Bacteria           | 42796  | 2352002 |
| Sample_SPA39.mb.135             | 61.20 | Bacteria           | 22760  | 2877403 |
| Sample_SPA39.Cluster1834cbin.1  | 54.30 | Bacteroidetes      | 74264  | 2157955 |
| Sample_SPA39.Cluster8588cbin.1  | 43.70 | Selenomonadales    | 27062  | 2327861 |
| Sample_SPA39.mb.12              | 60.20 | Actinobacteria     | 48767  | 1971041 |
| Sample_SPA39.Cluster3838        | 51.30 | Clostridiales      | 225998 | 2224316 |
| Sample_SPA39.Cluster11266       | 32.50 | Lactobacillales    | 21281  | 1835358 |
| Sample_SPA39.mb.30cbin.1        | 54.80 | Bacteroidetes      | 140483 | 2388844 |
| Sample_SPA39.Cluster6116cbin.1  | 45.30 | Clostridiales      | 165476 | 2230103 |
| Sample_SPA39.Cluster65cbin.1    | 59.90 | Bifidobacteriaceae | 48625  | 2033688 |
| Sample_SPA39.mb.102cbin.1       | 48.30 | Firmicutes         | 32691  | 2107846 |
| Sample_SPA39.mb.29              | 58.20 | Bacteria           | 32111  | 2352502 |
| Sample_SPA39.Cluster366         | 59.90 | Proteobacteria     | 97883  | 2454915 |
| Sample_SPA39.mb.100cbin.1       | 59.90 | Bifidobacteriaceae | 34990  | 2231844 |
| Sample_SPA39.mb.27              | 62.20 | Actinobacteria     | 170969 | 2120110 |
| Sample_SPA39.Cluster2121        | 53.20 | Selenomonadales    | 111045 | 2289189 |
| Sample_SPA39.mb.119             | 58.90 | Bacteroidetes      | 148902 | 2741332 |
| Sample_SPA39.mb.58cbin.1        | 38.40 | Clostridiales      | 15831  | 2443129 |
| Sample_SPA39.mb.33              | 41.20 | Clostridiales      | 9022   | 3165183 |

|                                 |       |                    |        |         |
|---------------------------------|-------|--------------------|--------|---------|
| Sample_SPA39.mb.128cbin.1       | 56.50 | Bifidobacteriaceae | 92709  | 2056379 |
| Sample_SPA39.Cluster8650cbin.1  | 41.00 | Lachnospiraceae    | 59258  | 2964132 |
| Sample_SPA39.mb.136             | 44.00 | Clostridiales      | 149104 | 2736982 |
| Sample_SPA39.mb.46cbin.1        | 51.10 | Clostridiales      | 26456  | 2283604 |
| Sample_SPA39.mb.113             | 62.30 | Clostridiales      | 39677  | 3419344 |
| Sample_SPA39.mb.47              | 61.40 | Clostridiales      | 109229 | 2579567 |
| Sample_SPA39.mb.64              | 57.30 | Clostridiales      | 13289  | 2171422 |
| Sample_SPA39.mb.6               | 57.70 | Clostridiales      | 76389  | 2406145 |
| Sample_SPA39.mb.49cbin.1        | 56.20 | Clostridiales      | 15621  | 2453860 |
| Sample_SPA39.mb.122cbin.1       | 43.40 | Bacteria           | 9782   | 3715419 |
| Sample_SPA39.Cluster4019        | 48.80 | Clostridiales      | 95793  | 6994033 |
| Sample_SPA39.mb.40              | 43.20 | Clostridiales      | 110943 | 2487816 |
| Sample_SPA39.Cluster6486cbin.1  | 45.20 | Bacteroidales      | 140248 | 4017448 |
| Sample_SPA39.mb.68              | 59.90 | Bacteroidetes      | 93195  | 2027921 |
| Sample_SPA39.mb.81              | 54.50 | Clostridia         | 58026  | 2445255 |
| Sample_SPA39.Cluster6261        | 41.90 | Bacteroidales      | 89459  | 4608356 |
| Sample_SPA39.mb.89cbin.1        | 49.10 | Bacteroidales      | 121713 | 3149785 |
| Sample_SPA39.mb.80cbin.1        | 31.50 | Firmicutes         | 76135  | 2301425 |
| Sample_SPA39.mb.99cbin.1        | 58.70 | Bacteroidetes      | 159104 | 2795355 |
| Sample_SPA39.mb.96              | 44.40 | Bacteroidales      | 63449  | 3091925 |
| Sample_SPA39.mb.34cbin.1        | 44.70 | Bacteroidales      | 73275  | 5067394 |
| Sample_SPA41.Cluster6557cbin.1  | 48.00 | Clostridia         | 248209 | 1688546 |
| Sample_SPA41.Cluster455cbin.1   | 53.50 | Clostridia         | 58505  | 1793898 |
| Sample_SPA41.Cluster5568        | 49.60 | Clostridiales      | 101964 | 1990909 |
| Sample_SPA41.mb.21              | 53.50 | Clostridiales      | 25153  | 1941098 |
| Sample_SPA41.mb.11              | 59.80 | Clostridia         | 17108  | 2523798 |
| Sample_SPA41.mb.25cbin.1        | 53.00 | Clostridia         | 53291  | 2049900 |
| Sample_SPA41.Cluster9759        | 37.50 | Clostridiales      | 152694 | 2176565 |
| Sample_SPA41.Cluster11858       | 27.30 | Euryarchaeota      | 14985  | 1645488 |
| Sample_SPA41.Cluster519         | 60.80 | Clostridiales      | 78410  | 1784109 |
| Sample_SPA41.mb.12              | 57.40 | Clostridiales      | 12777  | 1832199 |
| Sample_SPA41.Cluster10261cbin.1 | 33.30 | Bacteria           | 50244  | 2246219 |
| Sample_SPA41.Cluster6650cbin.1  | 46.70 | Lactobacillales    | 191845 | 2021598 |
| Sample_SPA41.Cluster395cbin.1   | 56.20 | Clostridiales      | 10020  | 2671950 |
| Sample_SPA41.Cluster11436       | 31.80 | Euryarchaeota      | 54937  | 1578345 |
| Sample_SPA41.Cluster135cbin.1   | 60.40 | Bacteria           | 9487   | 2191400 |
| Sample_SPA41.Cluster8883cbin.1  | 39.20 | Streptococcus      | 10958  | 1757858 |
| Sample_SPA41.mb.28              | 46.30 | Lachnospiraceae    | 98841  | 2576667 |
| Sample_SPA41.mb.64              | 58.60 | Clostridiales      | 6308   | 2441952 |
| Sample_SPA41.Cluster10322cbin.1 | 32.50 | Lactobacillales    | 34033  | 1818763 |
| Sample_SPA41.mb.40              | 60.30 | Actinobacteria     | 16177  | 1887628 |
| Sample_SPA41.mb.52              | 60.40 | Clostridiales      | 15818  | 1813753 |
| Sample_SPA41.Cluster9423        | 38.60 | Streptococcus      | 126855 | 1819711 |
| Sample_SPA41.Cluster9689        | 36.50 | Clostridiales      | 138982 | 2388848 |
| Sample_SPA41.Cluster334cbin.1   | 58.40 | Bifidobacteriaceae | 148013 | 2358325 |
| Sample_SPA41.mb.41              | 59.10 | Clostridiales      | 8103   | 1863544 |
| Sample_SPA41.mb.110cbin.1       | 57.60 | Clostridiales      | 59894  | 2768547 |
| Sample_SPA41.mb.50cbin.1        | 40.90 | Clostridiales      | 25898  | 1875087 |
| Sample_SPA41.mb.88              | 51.50 | Bacteroidetes      | 49507  | 2897420 |
| Sample_SPA41.mb.62cbin.1        | 46.00 | Clostridiales      | 21196  | 1870513 |
| Sample_SPA41.mb.51cbin.1        | 50.00 | Clostridiales      | 57904  | 3003820 |
| Sample_SPA41.mb.55cbin.1        | 59.80 | Clostridiales      | 14088  | 3250676 |
| Sample_SPA41.mb.7cbin.1         | 51.30 | Clostridiales      | 124949 | 2284584 |
| Sample_SPA41.mb.92cbin.1        | 60.20 | Bifidobacteriaceae | 7603   | 1882961 |
| Sample_SPA41.mb.71              | 41.90 | Lachnospiraceae    | 56012  | 2543783 |
| Sample_SPA41.Cluster5952        | 41.70 | Bacteroidales      | 58078  | 4670518 |
| Sample_SPA41.Cluster7247        | 43.00 | Bacteroidales      | 273843 | 4972160 |
| Sample_SPA41.Cluster4243cbin.1  | 50.40 | Enterobacteriaceae | 86821  | 4997531 |



|                                 |       |                     |        |         |
|---------------------------------|-------|---------------------|--------|---------|
| Sample_SPA42.mb.113             | 51.00 | Clostridia          | 18611  | 1543590 |
| Sample_SPA42.mb.44              | 59.30 | Clostridia          | 7066   | 2013086 |
| Sample_SPA42.Cluster102cbin.1   | 61.90 | Clostridiales       | 27164  | 1678088 |
| Sample_SPA42.Cluster500         | 59.50 | Clostridiales       | 24074  | 2080168 |
| Sample_SPA42.Cluster5135cbin.1  | 49.40 | Clostridiales       | 84480  | 2276560 |
| Sample_SPA42.Cluster16495cbin.1 | 34.00 | Bacteria            | 23100  | 2263009 |
| Sample_SPA42.mb.23              | 51.30 | Clostridiales       | 8243   | 1938031 |
| Sample_SPA42.Cluster5583cbin.1  | 49.30 | Bacteroidales       | 123177 | 3020019 |
| Sample_SPA42.mb.32cbin.1        | 59.40 | Bacteria            | 110794 | 5445828 |
| Sample_SPA42.Cluster10090       | 44.50 | Clostridiales       | 158428 | 2218082 |
| Sample_SPA42.mb.75cbin.1        | 52.80 | Clostridia          | 60235  | 2003999 |
| Sample_SPA42.mb.107cbin.1       | 40.70 | Clostridiales       | 66399  | 2097095 |
| Sample_SPA42.mb.72cbin.1        | 48.90 | Bacteria            | 43701  | 1996587 |
| Sample_SPA42.mb.29cbin.1        | 44.70 | Prevotella          | 14799  | 3198091 |
| Sample_SPA42.Cluster634         | 60.40 | Bifidobacteriaceae  | 100380 | 1917649 |
| Sample_SPA42.Cluster9771cbin.1  | 42.30 | Lachnospiraceae     | 6562   | 2009313 |
| Sample_SPA42.mb.82cbin.1        | 61.30 | Clostridiales       | 86182  | 1981682 |
| Sample_SPA42.mb.53cbin.1        | 46.00 | Clostridiales       | 53731  | 2203722 |
| Sample_SPA42.mb.4cbin.1         | 38.50 | Selenomonadales     | 7860   | 1799135 |
| Sample_SPA42.mb.33cbin.1        | 62.00 | Proteobacteria      | 47312  | 2608050 |
| Sample_SPA42.mb.64cbin.1        | 41.40 | Clostridiales       | 18634  | 2284034 |
| Sample_SPA42.mb.73cbin.1        | 51.60 | Clostridiales       | 37873  | 2011430 |
| Sample_SPA42.mb.74              | 54.40 | Bacteroidetes       | 122663 | 2247906 |
| Sample_SPA42.Cluster10643cbin.1 | 44.80 | Bacteroidales       | 21489  | 3651414 |
| Sample_SPA42.mb.88cbin.1        | 59.70 | Bacteroidetes       | 81909  | 3002207 |
| Sample_SPA42.mb.85              | 42.10 | Lachnospiraceae     | 46725  | 2465641 |
| Sample_SPA42.mb.7               | 43.40 | Bacteroidales       | 449355 | 3217693 |
| Sample_SPA42.mb.78cbin.1        | 42.30 | Bacteria            | 5836   | 2781298 |
| Sample_SPA42.mb.77              | 47.40 | Bacteroidales       | 12138  | 3231628 |
| Sample_SPA45.Cluster4144        | 51.40 | Clostridiales       | 194974 | 1869529 |
| Sample_SPA45.Cluster5872        | 45.90 | Clostridiales       | 56886  | 2048429 |
| Sample_SPA45.Cluster669cbin.1   | 58.30 | Clostridiales       | 61980  | 2716864 |
| Sample_SPA45.mb.122cbin.1       | 44.90 | Clostridiales       | 30322  | 2339628 |
| Sample_SPA45.mb.18cbin.1        | 55.20 | Clostridiales       | 34338  | 2382037 |
| Sample_SPA45.Cluster12792cbin.1 | 27.50 | Clostridiales       | 6298   | 2201757 |
| Sample_SPA45.mb.22cbin.1        | 57.00 | Clostridiales       | 68157  | 1916403 |
| Sample_SPA45.Cluster7259cbin.1  | 43.40 | Lachnospiraceae     | 39010  | 1977123 |
| Sample_SPA45.Cluster9319        | 40.90 | Clostridiales       | 208213 | 1972759 |
| Sample_SPA45.mb.105cbin.1       | 64.30 | Deltaproteobacteria | 10655  | 2297870 |
| Sample_SPA45.mb.26              | 61.50 | Actinobacteria      | 73878  | 2060642 |
| Sample_SPA45.Cluster5932cbin.1  | 45.00 | Prevotella          | 71162  | 3631918 |
| Sample_SPA45.Cluster10018cbin.1 | 41.10 | Lachnospiraceae     | 21704  | 2917341 |
| Sample_SPA45.mb.45cbin.1        | 62.30 | Clostridiales       | 146856 | 1863698 |
| Sample_SPA45.Cluster8060cbin.1  | 43.60 | Bacteroidales       | 9673   | 2425989 |
| Sample_SPA45.mb.117cbin.1       | 41.20 | Lachnospiraceae     | 29035  | 2397781 |
| Sample_SPA45.mb.67              | 58.20 | Clostridiales       | 65141  | 3015674 |
| Sample_SPA45.mb.56              | 41.20 | Clostridiales       | 31140  | 3234883 |
| Sample_SPA45.mb.101             | 41.90 | Lachnospiraceae     | 61178  | 2203925 |
| Sample_SPA45.mb.65              | 42.30 | Clostridiales       | 50290  | 2493294 |
| Sample_SPA45.mb.23cbin.1        | 57.80 | Clostridiales       | 16173  | 2210425 |
| Sample_SPA45.mb.86              | 34.20 | Clostridiales       | 29910  | 2082036 |
| Sample_SPA45.mb.70              | 62.60 | Clostridiales       | 5285   | 1991425 |
| Sample_SPA45.mb.59cbin.1        | 55.60 | Prevotella          | 10958  | 2158398 |
| Sample_SPA45.mb.8cbin.1         | 38.00 | Clostridiales       | 118907 | 2833587 |
| Sample_SPA45.mb.48cbin.1        | 44.50 | Clostridiales       | 140702 | 2542248 |
| Sample_SPA45.mb.71cbin.1        | 48.40 | Clostridiales       | 53962  | 2791740 |
| Sample_SPA45.Cluster3337cbin.1  | 49.20 | Clostridiales       | 18251  | 7019190 |
| Sample_SPA45.mb.37              | 43.70 | Lachnospiraceae     | 127987 | 2756900 |

|                                 |       |                    |        |         |
|---------------------------------|-------|--------------------|--------|---------|
| Sample_SPA45.Cluster5564        | 45.50 | Bacteroidales      | 61779  | 4038771 |
| Sample_SPA45.mb.73cbin.1        | 59.80 | Actinobacteria     | 70725  | 2200149 |
| Sample_SPA45.mb.93              | 51.30 | Bacteroidetes      | 89110  | 3595644 |
| Sample_SPA45.mb.104cbin.1       | 46.60 | Bacteroidales      | 63625  | 4074563 |
| Sample_SPA45.mb.85cbin.1        | 47.30 | Selenomonadales    | 36679  | 2194350 |
| Sample_SPA45.mb.82cbin.1        | 31.30 | Euryarchaeota      | 14334  | 1623014 |
| Sample_SPA45.mb.72              | 36.00 | Clostridiales      | 48059  | 2473513 |
| Sample_SPA45.mb.90              | 59.90 | Clostridiales      | 59428  | 2677892 |
| Sample_SPA45.mb.98cbin.1        | 63.80 | Actinobacteria     | 18187  | 2452172 |
| Sample_SPA45.mb.91              | 29.20 | Bacteria           | 44836  | 2524346 |
| Sample_SPA45.mb.87              | 43.90 | Bacteroidales      | 8532   | 2483587 |
| Sample_SPA45.mb.61              | 49.00 | Bacteroidales      | 15201  | 3304913 |
| Sample_SPA45.mb.5cbin.1         | 44.70 | Bacteroidales      | 80148  | 4401238 |
| Sample_SPA45.mb.95cbin.1        | 50.50 | Enterobacteriaceae | 127113 | 4749855 |
| Sample_SPA47.Cluster11721       | 26.00 | Bacteria           | 101404 | 1222202 |
| Sample_SPA47.Cluster4099        | 50.00 | Bacteria           | 543477 | 1480694 |
| Sample_SPA47.Cluster10668cbin.1 | 36.80 | Clostridiales      | 14810  | 2948507 |
| Sample_SPA47.Cluster8596cbin.1  | 42.70 | Clostridiales      | 71516  | 2874994 |
| Sample_SPA47.Cluster8125cbin.1  | 47.30 | Bacteria           | 118005 | 1910820 |
| Sample_SPA47.Cluster10912cbin.1 | 34.00 | Bacteria           | 24347  | 1994988 |
| Sample_SPA47.Cluster5842cbin.1  | 53.10 | Clostridiales      | 15680  | 2258769 |
| Sample_SPA47.Cluster54cbin.1    | 59.30 | Clostridiales      | 10343  | 2121098 |
| Sample_SPA47.Cluster5816        | 45.90 | Selenomonadales    | 137853 | 1713844 |
| Sample_SPA47.Cluster344cbin.1   | 57.40 | Clostridiales      | 42675  | 3073843 |
| Sample_SPA47.Cluster1713cbin.1  | 53.80 | Clostridiales      | 293961 | 1913968 |
| Sample_SPA47.Cluster251cbin.1   | 60.30 | Clostridiales      | 36620  | 2457082 |
| Sample_SPA47.mb.31              | 53.00 | Clostridia         | 86456  | 1975519 |
| Sample_SPA47.mb.119cbin.1       | 45.10 | Actinobacteria     | 18495  | 1843610 |
| Sample_SPA47.Cluster268         | 61.20 | Proteobacteria     | 180422 | 2447975 |
| Sample_SPA47.Cluster8012        | 40.90 | Clostridiales      | 228005 | 2088156 |
| Sample_SPA47.mb.102             | 62.40 | Actinobacteria     | 31087  | 1825175 |
| Sample_SPA47.mb.103cbin.1       | 49.00 | Bacteroidales      | 123929 | 3224020 |
| Sample_SPA47.mb.117             | 60.60 | Clostridiales      | 128203 | 2501350 |
| Sample_SPA47.Cluster903         | 55.30 | Proteobacteria     | 224146 | 2402758 |
| Sample_SPA47.Cluster980         | 56.40 | Bifidobacteriaceae | 149549 | 2057693 |
| Sample_SPA47.Cluster10cbin.1    | 61.80 | Clostridiales      | 31297  | 3337747 |
| Sample_SPA47.mb.112cbin.1       | 56.60 | Clostridiales      | 12359  | 2371388 |
| Sample_SPA47.Cluster310cbin.1   | 59.30 | Bacteroidetes      | 84953  | 2620513 |
| Sample_SPA47.mb.16              | 60.10 | Clostridiales      | 86715  | 2437418 |
| Sample_SPA47.mb.30cbin.1        | 61.80 | Clostridiales      | 80290  | 1828802 |
| Sample_SPA47.mb.42              | 36.30 | Clostridiales      | 33721  | 2497798 |
| Sample_SPA47.Cluster89cbin.1    | 60.30 | Bifidobacteriaceae | 24021  | 2407318 |
| Sample_SPA47.mb.36cbin.1        | 60.30 | Clostridiales      | 35636  | 1899839 |
| Sample_SPA47.Cluster6035        | 43.50 | Bacteroidales      | 123957 | 2871788 |
| Sample_SPA47.mb.29              | 45.70 | Clostridiales      | 10933  | 2161452 |
| Sample_SPA47.mb.49cbin.1        | 49.00 | Clostridiales      | 14152  | 2209614 |
| Sample_SPA47.mb.39cbin.1        | 54.20 | Bacteroidetes      | 86617  | 2117135 |
| Sample_SPA47.Cluster6029        | 43.20 | Bacteria           | 104475 | 4053135 |
| Sample_SPA47.mb.34              | 58.10 | Clostridiales      | 8118   | 2172824 |
| Sample_SPA47.mb.11              | 40.90 | Bacteroidales      | 32428  | 3169943 |
| Sample_SPA47.mb.84cbin.1        | 55.80 | Clostridiales      | 17271  | 3137056 |
| Sample_SPA47.mb.68              | 44.80 | Clostridiales      | 16268  | 2737729 |
| Sample_SPA47.Cluster4528        | 45.10 | Bacteroidales      | 95444  | 4386373 |
| Sample_SPA47.mb.87cbin.1        | 51.60 | Clostridiales      | 22893  | 2038297 |
| Sample_SPA47.mb.54cbin.1        | 59.80 | Bacteroidetes      | 151509 | 2809094 |
| Sample_SPA47.Cluster7793cbin.1  | 45.00 | Bacteroidales      | 27954  | 4476842 |
| Sample_SPA47.mb.27cbin.1        | 41.90 | Lachnospiraceae    | 80430  | 2524882 |
| Sample_SPA47.mb.74              | 60.00 | Bacteroidetes      | 72340  | 2488341 |

|                                |       |                    |        |         |
|--------------------------------|-------|--------------------|--------|---------|
| Sample_SPA47.mb.64             | 44.10 | Clostridiales      | 181169 | 2799391 |
| Sample_SPA47.mb.86             | 49.70 | Clostridiales      | 147126 | 2619594 |
| Sample_SPA47.mb.43             | 41.80 | Clostridiales      | 15827  | 3465404 |
| Sample_SPA47.mb.6              | 42.90 | Bacteria           | 122797 | 4620240 |
| Sample_SPB03.Cluster3771       | 51.40 | Bacteria           | 49780  | 1733601 |
| Sample_SPB03.Cluster911cbin.1  | 58.10 | Clostridiales      | 57825  | 3114608 |
| Sample_SPB03.mb.105            | 41.80 | Clostridiales      | 109417 | 2307174 |
| Sample_SPB03.mb.3              | 37.50 | Clostridiales      | 244098 | 2060834 |
| Sample_SPB03.Cluster3812cbin.1 | 49.60 | Clostridiales      | 95463  | 2233977 |
| Sample_SPB03.mb.42             | 36.30 | Clostridiales      | 73465  | 2587008 |
| Sample_SPB03.mb.65cbin.1       | 49.40 | Clostridiales      | 88598  | 1980255 |
| Sample_SPB03.mb.4              | 40.40 | Clostridiales      | 66445  | 2972480 |
| Sample_SPB03.mb.50cbin.1       | 59.00 | Clostridiales      | 8671   | 2130407 |
| Sample_SPB03.mb.74cbin.1       | 48.90 | Bacteria           | 35786  | 3445363 |
| Sample_SPB03.Cluster36cbin.1   | 63.90 | Actinobacteria     | 7962   | 2348002 |
| Sample_SPB03.mb.56             | 43.00 | Clostridiales      | 63871  | 3049467 |
| Sample_SPB03.Cluster323        | 60.70 | Bifidobacteriaceae | 18277  | 1762442 |
| Sample_SPB03.mb.48             | 54.00 | Clostridiales      | 14145  | 1805784 |
| Sample_SPB03.Cluster9294       | 43.10 | Clostridiales      | 171829 | 2887744 |
| Sample_SPB03.mb.47             | 33.90 | Clostridiales      | 53007  | 1882583 |
| Sample_SPB03.mb.64cbin.1       | 44.40 | Selenomonadales    | 6162   | 1891844 |
| Sample_SPB03.mb.5              | 52.60 | Clostridiales      | 252404 | 2059181 |
| Sample_SPB03.mb.22             | 43.60 | Lachnospiraceae    | 117064 | 2898957 |
| Sample_SPB03.mb.81             | 57.60 | Clostridiales      | 8326   | 1982030 |
| Sample_SPB03.mb.28             | 36.20 | Clostridiales      | 16930  | 2598038 |
| Sample_SPB03.mb.7              | 45.00 | Clostridiales      | 87187  | 2679056 |
| Sample_SPB03.mb.2cbin.1        | 48.50 | Bacteroidales      | 117189 | 3431634 |
| Sample_SPB03.mb.89             | 48.20 | Clostridiales      | 70942  | 2884596 |
| Sample_SPB03.mb.92             | 54.90 | Bacteroidetes      | 69366  | 1846838 |
| Sample_SPB03.mb.55             | 43.30 | Bacteroidales      | 449395 | 3110152 |
| Sample_SPB03.mb.67             | 49.40 | Lachnospiraceae    | 67780  | 3112574 |
| Sample_SPB03.mb.79cbin.1       | 43.30 | Bacteria           | 14015  | 3717470 |
| Sample_SPB03.mb.60cbin.1       | 45.30 | Bacteroidales      | 21866  | 4192473 |
| Sample_SPB03.mb.78             | 46.30 | Bacteroidales      | 15769  | 3365392 |
| Sample_SPB03.mb.100cbin.1      | 50.90 | Enterobacteriaceae | 51362  | 4343447 |
| Sample_SPB03.mb.35cbin.1       | 57.90 | Enterobacteriaceae | 138610 | 4919136 |
| Sample_SPB04.mb.16             | 26.70 | Bacteria           | 8501   | 1147621 |
| Sample_SPB04.mb.37             | 54.40 | Bacteria           | 116820 | 2146650 |
| Sample_SPB04.Cluster2864cbin.1 | 51.20 | Clostridiales      | 116755 | 2586474 |
| Sample_SPB04.mb.53cbin.1       | 57.10 | Clostridiales      | 12553  | 2345116 |
| Sample_SPB04.mb.15             | 60.50 | Actinobacteria     | 4821   | 1918137 |
| Sample_SPB04.Cluster3664cbin.1 | 49.40 | Bacteroidales      | 64043  | 2727432 |
| Sample_SPB04.Cluster4111       | 47.40 | Selenomonadales    | 38241  | 2141026 |
| Sample_SPB04.mb.61cbin.1       | 48.40 | Clostridiales      | 41583  | 2823225 |
| Sample_SPB04.mb.24             | 58.90 | Clostridiales      | 27519  | 2131936 |
| Sample_SPB04.Cluster4530cbin.1 | 42.90 | Prevotella         | 34872  | 3017369 |
| Sample_SPB04.Cluster383cbin.1  | 60.50 | Bifidobacteriaceae | 100917 | 1857572 |
| Sample_SPB04.Cluster1539cbin.1 | 49.90 | Bacteroidales      | 18917  | 2853624 |
| Sample_SPB04.mb.69cbin.1       | 56.50 | Clostridiales      | 11951  | 2479508 |
| Sample_SPB04.Cluster9349cbin.1 | 37.40 | Clostridiales      | 129673 | 2749613 |
| Sample_SPB04.mb.44             | 44.20 | Clostridiales      | 144228 | 2657980 |
| Sample_SPB04.mb.56cbin.1       | 51.10 | Clostridiales      | 275226 | 2315976 |
| Sample_SPB04.mb.7cbin.1        | 46.80 | Lachnospiraceae    | 39375  | 3284397 |
| Sample_SPB04.Cluster2090cbin.1 | 55.40 | Proteobacteria     | 25025  | 2696537 |
| Sample_SPB04.mb.60cbin.1       | 43.20 | Lachnospiraceae    | 58189  | 3288792 |
| Sample_SPB04.mb.67cbin.1       | 44.30 | Prevotella         | 15678  | 3783017 |
| Sample_SPB04.Cluster4564cbin.1 | 45.40 | Bacteroidales      | 42833  | 3908822 |
| Sample_SPB04.mb.32cbin.1       | 45.10 | Bacteroidales      | 27750  | 4613910 |

|                                 |       |                     |        |         |
|---------------------------------|-------|---------------------|--------|---------|
| Sample_SPB04.Cluster3304cbin.1  | 50.80 | Enterobacteriaceae  | 195272 | 4573920 |
| Sample_SPB06.Cluster12077       | 27.90 | Clostridiales       | 118035 | 1355587 |
| Sample_SPB06.mb.101cbin.1       | 26.10 | Bacteria            | 59839  | 1147710 |
| Sample_SPB06.mb.109             | 26.60 | Bacteria            | 73441  | 1215045 |
| Sample_SPB06.Cluster305cbin.1   | 58.90 | Clostridiales       | 8879   | 1836066 |
| Sample_SPB06.Cluster460cbin.1   | 58.70 | Clostridiales       | 53046  | 2358907 |
| Sample_SPB06.Cluster5391cbin.1  | 48.10 | Clostridiales       | 99549  | 2992114 |
| Sample_SPB06.Cluster11221       | 33.70 | Clostridiales       | 67157  | 1698604 |
| Sample_SPB06.mb.121             | 42.30 | Clostridiales       | 47257  | 2563003 |
| Sample_SPB06.Cluster5816        | 44.60 | Clostridiales       | 178567 | 2000115 |
| Sample_SPB06.Cluster10276       | 32.60 | Lactobacillales     | 7658   | 1710155 |
| Sample_SPB06.Cluster11862       | 31.00 | Firmicutes          | 81561  | 1557289 |
| Sample_SPB06.Cluster230         | 60.30 | Bifidobacteriaceae  | 100946 | 2027561 |
| Sample_SPB06.mb.22cbin.1        | 58.30 | Clostridiales       | 55563  | 2968322 |
| Sample_SPB06.Cluster6548        | 44.10 | Clostridiales       | 296576 | 2586816 |
| Sample_SPB06.Cluster483         | 58.20 | Bacteria            | 211576 | 3021624 |
| Sample_SPB06.mb.124cbin.1       | 54.00 | Clostridiales       | 20700  | 2235339 |
| Sample_SPB06.Cluster79cbin.1    | 63.10 | Actinobacteria      | 77546  | 2681273 |
| Sample_SPB06.Cluster6857        | 43.80 | Lachnospiraceae     | 100853 | 2487075 |
| Sample_SPB06.Cluster11209       | 36.10 | Clostridiales       | 228450 | 2675992 |
| Sample_SPB06.mb.100             | 38.10 | Clostridiales       | 121964 | 1902345 |
| Sample_SPB06.mb.30cbin.1        | 59.70 | Clostridiales       | 7110   | 1531563 |
| Sample_SPB06.mb.27              | 38.30 | Clostridiales       | 38632  | 2997920 |
| Sample_SPB06.mb.139             | 61.00 | Clostridiales       | 23423  | 2324094 |
| Sample_SPB06.Cluster8017        | 41.20 | Lachnospiraceae     | 77218  | 2818684 |
| Sample_SPB06.mb.115cbin.1       | 60.20 | Bacteroidetes       | 42052  | 2568949 |
| Sample_SPB06.mb.132cbin.1       | 49.40 | Bacteroidales       | 51528  | 2940119 |
| Sample_SPB06.mb.126             | 44.50 | Clostridiales       | 70329  | 2469401 |
| Sample_SPB06.mb.66              | 49.70 | Clostridiales       | 114460 | 1974386 |
| Sample_SPB06.mb.55              | 61.40 | Clostridiales       | 76403  | 1692397 |
| Sample_SPB06.mb.20              | 60.40 | Clostridiales       | 26035  | 1961024 |
| Sample_SPB06.mb.33cbin.1        | 43.40 | Lachnospiraceae     | 37782  | 1829804 |
| Sample_SPB06.mb.48              | 58.70 | Clostridiales       | 47050  | 2517457 |
| Sample_SPB06.mb.46cbin.1        | 52.00 | Clostridiales       | 208242 | 2248886 |
| Sample_SPB06.Cluster5860cbin.1  | 45.20 | Bacteroidales       | 180416 | 4416510 |
| Sample_SPB06.Cluster6553cbin.1  | 42.10 | Bacteroidales       | 105233 | 4190992 |
| Sample_SPB06.mb.74cbin.1        | 44.70 | Selenomonadales     | 19794  | 1828889 |
| Sample_SPB06.mb.81              | 54.80 | Clostridiales       | 8115   | 1424872 |
| Sample_SPB06.Cluster7281cbin.1  | 45.10 | Bacteroidales       | 150176 | 4494753 |
| Sample_SPB06.mb.97              | 56.70 | Clostridiales       | 50536  | 2497498 |
| Sample_SPB06.mb.83cbin.1        | 59.70 | Actinobacteria      | 119135 | 2125864 |
| Sample_SPB06.mb.44              | 40.30 | Clostridiales       | 75695  | 2914362 |
| Sample_SPB06.mb.54cbin.1        | 39.30 | Streptococcus       | 6645   | 2014615 |
| Sample_SPB06.mb.93              | 47.80 | Clostridiales       | 38858  | 1865450 |
| Sample_SPB06.mb.65              | 43.80 | Clostridiales       | 13175  | 2577241 |
| Sample_SPB06.Cluster6571cbin.1  | 44.00 | Bacteria            | 83932  | 5364619 |
| Sample_SPB06.mb.96cbin.1        | 64.20 | Deltaproteobacteria | 11159  | 2265215 |
| Sample_SPB06.mb.89cbin.1        | 48.40 | Proteobacteria      | 38545  | 2559053 |
| Sample_SPB06.mb.88cbin.1        | 46.50 | Bacteroidales       | 42296  | 4172345 |
| Sample_SPB06.mb.25              | 42.60 | Bacteroidales       | 144830 | 6595634 |
| Sample_SPB07.Cluster10588cbin.1 | 24.30 | Bacteria            | 61976  | 961132  |
| Sample_SPB07.Cluster10626       | 26.40 | Bacteria            | 125110 | 1111497 |
| Sample_SPB07.Cluster3324cbin.1  | 47.40 | Bacteria            | 10856  | 1638213 |
| Sample_SPB07.mb.19              | 26.60 | Bacteria            | 90353  | 1327831 |
| Sample_SPB07.Cluster127cbin.1   | 61.40 | Clostridiales       | 51936  | 1768919 |
| Sample_SPB07.Cluster2229cbin.1  | 51.40 | Clostridiales       | 22874  | 2254571 |
| Sample_SPB07.mb.109             | 62.20 | Clostridiales       | 11099  | 1781015 |
| Sample_SPB07.mb.105cbin.1       | 58.50 | Clostridiales       | 9913   | 1935040 |

|                                |       |                    |        |         |
|--------------------------------|-------|--------------------|--------|---------|
| Sample_SPB07.mb.44             | 62.20 | Clostridiales      | 33868  | 1757507 |
| Sample_SPB07.mb.47             | 59.30 | Clostridiales      | 13267  | 1866186 |
| Sample_SPB07.Cluster1982       | 54.70 | Bacteroidetes      | 132479 | 2865936 |
| Sample_SPB07.Cluster1478       | 55.50 | Proteobacteria     | 114204 | 2278325 |
| Sample_SPB07.Cluster5497cbin.1 | 43.30 | Lachnospiraceae    | 49263  | 2128875 |
| Sample_SPB07.Cluster153cbin.1  | 58.60 | Bacteria           | 16878  | 2879288 |
| Sample_SPB07.mb.87cbin.1       | 29.90 | Bacteria           | 40666  | 2516683 |
| Sample_SPB07.mb.104            | 59.30 | Clostridiales      | 18142  | 2541210 |
| Sample_SPB07.Cluster1836       | 56.30 | Bifidobacteriaceae | 473789 | 2191524 |
| Sample_SPB07.Cluster283        | 60.40 | Bifidobacteriaceae | 83907  | 1911526 |
| Sample_SPB07.Cluster8450       | 39.50 | Clostridiales      | 77535  | 2168308 |
| Sample_SPB07.mb.31cbin.1       | 49.00 | Firmicutes         | 32275  | 1811209 |
| Sample_SPB07.mb.42             | 46.60 | Lachnospiraceae    | 56403  | 2626066 |
| Sample_SPB07.Cluster3014cbin.1 | 55.30 | Bacteroidales      | 51978  | 2675541 |
| Sample_SPB07.mb.2              | 44.10 | Clostridiales      | 170198 | 2410727 |
| Sample_SPB07.mb.50             | 60.30 | Actinobacteria     | 9866   | 1752895 |
| Sample_SPB07.Cluster7656       | 41.30 | Lachnospiraceae    | 75490  | 2709841 |
| Sample_SPB07.mb.38cbin.1       | 63.60 | Actinobacteria     | 40604  | 2611692 |
| Sample_SPB07.mb.30             | 59.30 | Bacteroidetes      | 152133 | 2565908 |
| Sample_SPB07.mb.66             | 54.40 | Clostridiales      | 22151  | 2688861 |
| Sample_SPB07.mb.4cbin.1        | 54.40 | Bacteroidetes      | 94607  | 2202675 |
| Sample_SPB07.mb.86             | 58.30 | Clostridiales      | 55361  | 2798783 |
| Sample_SPB07.mb.14cbin.1       | 37.30 | Clostridiales      | 94976  | 2771063 |
| Sample_SPB07.mb.48             | 44.10 | Lachnospiraceae    | 14235  | 2854547 |
| Sample_SPB07.mb.94cbin.1       | 49.10 | Clostridiales      | 10496  | 2245182 |
| Sample_SPB07.mb.49             | 45.10 | Clostridiales      | 29864  | 2789041 |
| Sample_SPB07.Cluster6051cbin.1 | 43.30 | Bacteria           | 86032  | 4056458 |
| Sample_SPB07.Cluster4507cbin.1 | 48.30 | Bacteroidales      | 137138 | 3770281 |
| Sample_SPB07.Cluster4015cbin.1 | 43.10 | Bacteria           | 7223   | 4212262 |
| Sample_SPB07.Cluster5231       | 45.40 | Bacteroidales      | 179476 | 4124602 |
| Sample_SPB07.mb.72             | 49.50 | Lachnospiraceae    | 86601  | 2858333 |
| Sample_SPB07.mb.75             | 47.30 | Bacteroidales      | 22298  | 3041625 |
| Sample_SPB07.mb.7cbin.1        | 44.30 | Bacteroidales      | 68531  | 3512872 |
| Sample_SPB07.mb.89             | 40.80 | Bacteroidales      | 55518  | 3080307 |
| Sample_SPB08.Cluster2354cbin.1 | 45.70 | Bacteria           | 15069  | 4070868 |
| Sample_SPB08.Cluster4881       | 49.40 | Clostridiales      | 116352 | 1934789 |
| Sample_SPB08.Cluster340cbin.1  | 58.40 | Clostridiales      | 83396  | 2306060 |
| Sample_SPB08.Cluster151        | 61.80 | Clostridiales      | 80473  | 1602755 |
| Sample_SPB08.mb.31             | 26.00 | Bacteria           | 35513  | 1328662 |
| Sample_SPB08.Cluster3815cbin.1 | 49.60 | Clostridiales      | 23403  | 2643651 |
| Sample_SPB08.Cluster8127       | 44.90 | Actinobacteria     | 337380 | 1838228 |
| Sample_SPB08.Cluster4330cbin.1 | 45.70 | Selenomonadales    | 33208  | 1857192 |
| Sample_SPB08.Cluster5760       | 45.70 | Firmicutes         | 108854 | 1601779 |
| Sample_SPB08.mb.46             | 57.50 | Bacteria           | 29425  | 1766822 |
| Sample_SPB08.mb.5              | 58.50 | Clostridia         | 39674  | 2960042 |
| Sample_SPB08.mb.13cbin.1       | 57.30 | Clostridiales      | 55875  | 1784717 |
| Sample_SPB08.Cluster2943cbin.1 | 53.10 | Clostridiales      | 157971 | 1890799 |
| Sample_SPB08.mb.25cbin.1       | 53.80 | Clostridiales      | 46183  | 1834461 |
| Sample_SPB08.Cluster6125       | 46.30 | Bacteroidetes      | 287051 | 2351962 |
| Sample_SPB08.mb.53             | 58.10 | Clostridiales      | 52020  | 3012930 |
| Sample_SPB08.mb.38             | 56.00 | Clostridiales      | 11042  | 2256902 |
| Sample_SPB08.mb.63             | 55.70 | Clostridiales      | 130707 | 1912673 |
| Sample_SPB08.mb.55             | 57.90 | Clostridiales      | 91705  | 2017909 |
| Sample_SPB08.Cluster7895       | 44.30 | Clostridiales      | 152513 | 2103501 |
| Sample_SPB08.Cluster6032cbin.1 | 44.90 | Clostridiales      | 15616  | 2454159 |
| Sample_SPB08.mb.116            | 55.40 | Clostridiales      | 76976  | 3509350 |
| Sample_SPB08.mb.114            | 54.30 | Bacteroidetes      | 78909  | 2314717 |
| Sample_SPB08.Cluster8080       | 43.60 | Clostridiales      | 252391 | 2925515 |

|                                |       |                    |        |         |
|--------------------------------|-------|--------------------|--------|---------|
| Sample_SPB08.mb.50             | 61.00 | Clostridiales      | 12492  | 2169313 |
| Sample_SPB08.mb.7              | 57.60 | Clostridiales      | 31458  | 1658697 |
| Sample_SPB08.mb.58cbin.1       | 44.90 | Selenomonadales    | 22636  | 1775491 |
| Sample_SPB08.mb.70cbin.1       | 48.90 | Clostridiales      | 8935   | 2426274 |
| Sample_SPB08.mb.101cbin.1      | 37.40 | Clostridiales      | 101053 | 2765190 |
| Sample_SPB08.mb.65             | 56.60 | Clostridiales      | 53542  | 2623848 |
| Sample_SPB08.mb.59cbin.1       | 59.00 | Clostridiales      | 27920  | 2093756 |
| Sample_SPB08.mb.86             | 59.80 | Clostridiales      | 96352  | 2197618 |
| Sample_SPB08.mb.26cbin.1       | 43.30 | Bacteria           | 31069  | 4012334 |
| Sample_SPB08.Cluster8661cbin.1 | 45.50 | Bacteroidales      | 22212  | 3681500 |
| Sample_SPB08.Cluster4205cbin.1 | 41.90 | Bacteroidales      | 18970  | 4404730 |
| Sample_SPB08.mb.62             | 58.90 | Bacteroidetes      | 107446 | 2761390 |
| Sample_SPB08.mb.69             | 41.70 | Lachnospiraceae    | 105615 | 2721989 |
| Sample_SPB08.mb.74cbin.1       | 35.90 | Clostridiales      | 49087  | 2449937 |
| Sample_SPB08.mb.79             | 42.00 | Lachnospiraceae    | 32017  | 2286407 |
| Sample_SPB08.mb.87cbin.1       | 46.40 | Bacteroidales      | 142848 | 4061936 |
| Sample_SPB09.Cluster19cbin.1   | 62.20 | Clostridiales      | 9585   | 1480569 |
| Sample_SPB09.mb.30             | 58.40 | Clostridiales      | 52049  | 2867055 |
| Sample_SPB09.mb.19             | 42.70 | Clostridiales      | 63033  | 3339233 |
| Sample_SPB09.Cluster7564cbin.1 | 40.90 | Clostridiales      | 66462  | 3484331 |
| Sample_SPB09.mb.5cbin.1        | 36.50 | Clostridiales      | 7311   | 2078678 |
| Sample_SPB09.mb.20cbin.1       | 52.20 | Clostridiales      | 130345 | 2294429 |
| Sample_SPB09.Cluster332cbin.1  | 56.50 | Clostridiales      | 15436  | 2552186 |
| Sample_SPB09.mb.50cbin.1       | 57.90 | Clostridiales      | 18834  | 2224528 |
| Sample_SPB09.mb.2              | 41.90 | Clostridiales      | 238572 | 1966669 |
| Sample_SPB09.Cluster116        | 60.40 | Bifidobacteriaceae | 70017  | 1905780 |
| Sample_SPB09.Cluster5574       | 43.60 | Clostridiales      | 114828 | 2254440 |
| Sample_SPB09.Cluster1064       | 54.20 | Bacteroidales      | 84203  | 2387513 |
| Sample_SPB09.mb.85cbin.1       | 49.10 | Clostridiales      | 13881  | 2511248 |
| Sample_SPB09.mb.27             | 41.10 | Clostridiales      | 208653 | 2709700 |
| Sample_SPB09.Cluster245cbin.1  | 58.60 | Bacteroidetes      | 183898 | 2692179 |
| Sample_SPB09.Cluster8333cbin.1 | 37.20 | Clostridiales      | 60409  | 2765928 |
| Sample_SPB09.mb.88cbin.1       | 49.20 | Bacteroidales      | 42701  | 3220703 |
| Sample_SPB09.mb.67             | 46.60 | Lachnospiraceae    | 69246  | 2994010 |
| Sample_SPB09.mb.61             | 54.50 | Bacteroidetes      | 125839 | 2216928 |
| Sample_SPB09.mb.32             | 41.40 | Lachnospiraceae    | 117573 | 2795606 |
| Sample_SPB09.mb.64             | 27.30 | Clostridiales      | 22795  | 3422019 |
| Sample_SPB09.mb.54cbin.1       | 48.50 | Proteobacteria     | 73818  | 2596661 |
| Sample_SPB09.mb.56             | 43.40 | Bacteroidales      | 274935 | 3226542 |
| Sample_SPB09.Cluster3968       | 42.20 | Bacteria           | 26174  | 4335392 |
| Sample_SPB09.mb.24cbin.1       | 46.20 | Bacteroidales      | 168141 | 3971203 |
| Sample_SPB09.mb.82cbin.1       | 41.70 | Bacteroidales      | 26737  | 4090056 |
| Sample_SPB09.mb.46cbin.1       | 44.90 | Bacteroidales      | 26859  | 4362076 |
| Sample_SPB09.mb.8cbin.1        | 57.90 | Enterobacteriaceae | 73258  | 4913944 |
| Sample_SPB10.Cluster7361cbin.1 | 33.30 | Clostridiales      | 144560 | 1861076 |
| Sample_SPB10.Cluster4204cbin.1 | 41.90 | Clostridiales      | 27689  | 2632507 |
| Sample_SPB10.Cluster2637cbin.1 | 48.10 | Clostridiales      | 98871  | 2877731 |
| Sample_SPB10.mb.63             | 37.80 | Clostridiales      | 287587 | 1872173 |
| Sample_SPB10.Cluster1613cbin.1 | 47.70 | Firmicutes         | 37494  | 1617323 |
| Sample_SPB10.mb.73             | 57.70 | Clostridiales      | 12839  | 1855234 |
| Sample_SPB10.Cluster7560       | 29.90 | Bacteria           | 64494  | 2160459 |
| Sample_SPB10.Cluster5073cbin.1 | 40.10 | Streptococcus      | 6193   | 1559399 |
| Sample_SPB10.mb.60cbin.1       | 49.60 | Clostridiales      | 33507  | 2132192 |
| Sample_SPB10.mb.9              | 60.20 | Clostridiales      | 151630 | 1944555 |
| Sample_SPB10.Cluster192        | 60.50 | Bifidobacteriaceae | 55321  | 1887802 |
| Sample_SPB10.Cluster6869cbin.1 | 35.90 | Clostridiales      | 172320 | 2584888 |
| Sample_SPB10.Cluster6006       | 37.50 | Clostridiales      | 111736 | 2562713 |
| Sample_SPB10.mb.71cbin.1       | 60.20 | Clostridiales      | 58040  | 2990739 |

|                                |       |                    |        |         |
|--------------------------------|-------|--------------------|--------|---------|
| Sample_SPB10.mb.58             | 38.80 | Clostridiales      | 78472  | 1996120 |
| Sample_SPB10.mb.10cbin.1       | 58.00 | Clostridiales      | 46765  | 2404798 |
| Sample_SPB10.Cluster4063       | 41.40 | Lachnospiraceae    | 89269  | 2866756 |
| Sample_SPB10.mb.70cbin.1       | 56.40 | Clostridiales      | 11578  | 2518798 |
| Sample_SPB10.Cluster12cbin.1   | 64.80 | Actinobacteria     | 6511   | 2653929 |
| Sample_SPB10.mb.36cbin.1       | 61.50 | Clostridiales      | 85150  | 3543281 |
| Sample_SPB10.mb.6cbin.1        | 58.20 | Clostridiales      | 48060  | 2552282 |
| Sample_SPB10.mb.29             | 43.70 | Lachnospiraceae    | 43559  | 2711895 |
| Sample_SPB10.mb.77             | 43.20 | Lachnospiraceae    | 115718 | 3003496 |
| Sample_SPB10.mb.54cbin.1       | 48.70 | Proteobacteria     | 11436  | 2436103 |
| Sample_SPB10.Cluster2695cbin.1 | 46.50 | Bacteroidales      | 132555 | 4055767 |
| Sample_SPB10.mb.53             | 46.10 | Bacteroidales      | 158860 | 3410303 |
| Sample_SPB10.Cluster4934cbin.1 | 41.80 | Bacteroides        | 58886  | 5618303 |
| Sample_SPB10.mb.28             | 41.60 | Bacteroidales      | 241519 | 5197870 |
| Sample_SPB10.mb.67cbin.1       | 51.10 | Enterobacteriaceae | 6543   | 3909192 |
| Sample_SPB11.Cluster5576       | 41.70 | Clostridiales      | 147630 | 2792134 |
| Sample_SPB11.Cluster2626       | 48.20 | Clostridiales      | 101321 | 2771169 |
| Sample_SPB11.mb.24             | 55.70 | Clostridiales      | 9962   | 2155601 |
| Sample_SPB11.Cluster14         | 62.30 | Clostridiales      | 15018  | 2204787 |
| Sample_SPB11.Cluster1613cbin.1 | 51.30 | Clostridiales      | 21039  | 2323733 |
| Sample_SPB11.mb.54             | 58.50 | Clostridiales      | 24315  | 2850048 |
| Sample_SPB11.Cluster96cbin.1   | 58.90 | Clostridiales      | 10638  | 2243924 |
| Sample_SPB11.mb.58             | 60.20 | Clostridiales      | 10471  | 2402701 |
| Sample_SPB11.Cluster2830       | 47.40 | Selenomonadales    | 78745  | 1996728 |
| Sample_SPB11.Cluster7987cbin.1 | 33.50 | Bacteria           | 23429  | 2746736 |
| Sample_SPB11.Cluster12cbin.1   | 61.00 | Bifidobacteriaceae | 6015   | 1510518 |
| Sample_SPB11.Cluster6266       | 40.60 | Clostridiales      | 187584 | 2058811 |
| Sample_SPB11.Cluster1895       | 51.50 | Clostridiales      | 222169 | 2128308 |
| Sample_SPB11.mb.1              | 46.60 | Lachnospiraceae    | 79271  | 2869806 |
| Sample_SPB11.Cluster4339       | 44.00 | Clostridiales      | 197389 | 2502136 |
| Sample_SPB11.mb.4              | 49.50 | Clostridiales      | 15351  | 2312300 |
| Sample_SPB11.mb.3              | 54.40 | Bacteroidetes      | 107408 | 1910689 |
| Sample_SPB11.Cluster4404       | 43.70 | Clostridiales      | 178809 | 2525565 |
| Sample_SPB11.Cluster746        | 55.60 | Proteobacteria     | 149048 | 2230334 |
| Sample_SPB11.mb.63cbin.1       | 60.70 | Clostridiales      | 50591  | 2364395 |
| Sample_SPB11.mb.80cbin.1       | 45.20 | Actinobacteria     | 23162  | 1861829 |
| Sample_SPB11.mb.39             | 59.20 | Clostridiales      | 9592   | 1846581 |
| Sample_SPB11.mb.66             | 59.90 | Actinobacteria     | 108706 | 2240605 |
| Sample_SPB11.mb.10             | 41.60 | Lachnospiraceae    | 74432  | 2615493 |
| Sample_SPB11.Cluster7487cbin.1 | 36.30 | Clostridiales      | 115781 | 3510474 |
| Sample_SPB11.mb.53cbin.1       | 41.90 | Lachnospiraceae    | 51849  | 2339415 |
| Sample_SPB11.mb.13cbin.1       | 43.40 | Bacteroidales      | 64286  | 3111157 |
| Sample_SPB11.mb.47             | 46.00 | Bacteroidales      | 37657  | 2979480 |
| Sample_SPB11.Cluster2040cbin.1 | 44.10 | Bacteroidales      | 72544  | 3617791 |
| Sample_SPB11.mb.73cbin.1       | 42.90 | Clostridiales      | 147522 | 2644703 |
| Sample_SPB11.Cluster3214cbin.1 | 46.30 | Bacteroidales      | 153095 | 4387432 |
| Sample_SPB11.mb.74             | 40.30 | Bacteroidales      | 34302  | 3293242 |
| Sample_SPB11.mb.8cbin.1        | 44.50 | Prevotella         | 19924  | 3990583 |
| Sample_SPB11.Cluster1227cbin.1 | 41.70 | Bacteroidales      | 25240  | 5224900 |
| Sample_SPB12.Cluster19582      | 26.40 | Bacteria           | 113389 | 1122008 |
| Sample_SPB12.Cluster18884      | 32.10 | Bacteria           | 299421 | 1827647 |
| Sample_SPB12.Cluster6377cbin.1 | 49.70 | Clostridia         | 55640  | 1792675 |
| Sample_SPB12.Cluster3162cbin.1 | 54.50 | Actinobacteria     | 20448  | 1484367 |
| Sample_SPB12.mb.124            | 58.70 | Clostridiales      | 10947  | 1892027 |
| Sample_SPB12.mb.127            | 58.60 | Clostridiales      | 9301   | 2670086 |
| Sample_SPB12.Cluster4807cbin.1 | 50.70 | Bacteroidales      | 19979  | 2275216 |
| Sample_SPB12.mb.131            | 41.20 | Clostridiales      | 16162  | 2881146 |
| Sample_SPB12.mb.15             | 36.20 | Clostridiales      | 248497 | 1919944 |

|                                 |       |                    |        |         |
|---------------------------------|-------|--------------------|--------|---------|
| Sample_SPB12.Cluster13513cbin.1 | 41.40 | Clostridiales      | 140551 | 2533968 |
| Sample_SPB12.mb.138             | 51.50 | Clostridiales      | 58924  | 2294673 |
| Sample_SPB12.Cluster1418        | 55.60 | Bacteria           | 174517 | 2689704 |
| Sample_SPB12.Cluster18261       | 32.50 | Lactobacillales    | 75394  | 1879386 |
| Sample_SPB12.Cluster11654cbin.1 | 42.40 | Lachnospiraceae    | 18721  | 2324458 |
| Sample_SPB12.mb.34              | 45.60 | Clostridiales      | 92790  | 1583580 |
| Sample_SPB12.Cluster197         | 62.40 | Proteobacteria     | 68391  | 2338404 |
| Sample_SPB12.mb.101cbin.1       | 51.10 | Clostridiales      | 147408 | 2233978 |
| Sample_SPB12.mb.4               | 36.30 | Clostridiales      | 93467  | 2575755 |
| Sample_SPB12.Cluster9121cbin.1  | 43.50 | Lachnospiraceae    | 20109  | 2722981 |
| Sample_SPB12.mb.132cbin.1       | 59.80 | Bifidobacteriaceae | 30176  | 1762152 |
| Sample_SPB12.mb.33              | 53.20 | Clostridiales      | 11294  | 1987841 |
| Sample_SPB12.mb.94              | 26.70 | Bacteria           | 79276  | 1381268 |
| Sample_SPB12.mb.121             | 60.50 | Bifidobacteriaceae | 83870  | 1881833 |
| Sample_SPB12.mb.10cbin.1        | 44.90 | Prevotella         | 13019  | 3076997 |
| Sample_SPB12.mb.128cbin.1       | 50.60 | Bacteroidales      | 143046 | 2200942 |
| Sample_SPB12.mb.43cbin.1        | 48.40 | Clostridiales      | 82839  | 2779786 |
| Sample_SPB12.mb.29cbin.1        | 47.70 | Selenomonadales    | 31129  | 2006099 |
| Sample_SPB12.mb.35              | 61.20 | Clostridiales      | 6619   | 1987049 |
| Sample_SPB12.mb.23              | 42.70 | Clostridiales      | 204061 | 2786119 |
| Sample_SPB12.mb.21              | 44.30 | Clostridiales      | 156140 | 2644062 |
| Sample_SPB12.mb.51cbin.1        | 44.60 | Clostridiales      | 146692 | 1660082 |
| Sample_SPB12.mb.37              | 41.30 | Clostridiales      | 96412  | 2542155 |
| Sample_SPB12.mb.47              | 44.90 | Lachnospiraceae    | 89155  | 2583189 |
| Sample_SPB12.mb.52              | 44.00 | Clostridiales      | 97053  | 2201312 |
| Sample_SPB12.mb.99cbin.1        | 45.40 | Clostridiales      | 102005 | 2260220 |
| Sample_SPB12.Cluster6415cbin.1  | 45.50 | Bacteroidales      | 28378  | 3957871 |
| Sample_SPB12.mb.90cbin.1        | 51.20 | Firmicutes         | 38668  | 2159361 |
| Sample_SPB12.mb.87cbin.1        | 42.60 | Clostridiales      | 104526 | 2795054 |
| Sample_SPB12.Cluster1202cbin.1  | 57.40 | Enterobacteriaceae | 226235 | 5321391 |
| Sample_SPB13.Cluster2582        | 46.50 | Bacteria           | 114472 | 3968614 |
| Sample_SPB13.Cluster286         | 60.30 | Clostridiales      | 109440 | 1824937 |
| Sample_SPB13.Cluster219cbin.1   | 59.00 | Clostridiales      | 19386  | 2001857 |
| Sample_SPB13.mb.28              | 37.10 | Clostridiales      | 20173  | 2147681 |
| Sample_SPB13.Cluster413         | 57.70 | Clostridiales      | 69451  | 2218274 |
| Sample_SPB13.mb.13              | 58.60 | Bacteroidetes      | 178222 | 2424719 |
| Sample_SPB13.Cluster3974cbin.1  | 42.60 | Clostridiales      | 7700   | 2283232 |
| Sample_SPB13.mb.43cbin.1        | 60.70 | Clostridiales      | 72153  | 2355885 |
| Sample_SPB13.Cluster4375cbin.1  | 46.80 | Lachnospiraceae    | 58970  | 3162701 |
| Sample_SPB13.Cluster6039        | 40.60 | Clostridiales      | 175133 | 2120179 |
| Sample_SPB13.Cluster3169        | 43.60 | Selenomonadales    | 133862 | 2432873 |
| Sample_SPB13.mb.32              | 54.70 | Bacteroidetes      | 95933  | 2062241 |
| Sample_SPB13.Cluster17cbin.1    | 60.40 | Bifidobacteriaceae | 13967  | 2093520 |
| Sample_SPB13.Cluster418         | 59.40 | Bifidobacteriaceae | 124579 | 2168015 |
| Sample_SPB13.Cluster946         | 54.20 | Proteobacteria     | 101610 | 2394022 |
| Sample_SPB13.mb.1               | 43.80 | Lachnospiraceae    | 79386  | 2707282 |
| Sample_SPB13.Cluster8cbin.1     | 61.40 | Clostridiales      | 23769  | 3510948 |
| Sample_SPB13.mb.81              | 58.50 | Clostridiales      | 14183  | 1962098 |
| Sample_SPB13.mb.83              | 41.60 | Clostridiales      | 14803  | 2625544 |
| Sample_SPB13.Cluster3792cbin.1  | 40.80 | Bacteroidales      | 57155  | 3094999 |
| Sample_SPB13.mb.69cbin.1        | 60.40 | Clostridiales      | 127289 | 3122874 |
| Sample_SPB13.mb.38cbin.1        | 41.30 | Clostridiales      | 121957 | 3583236 |
| Sample_SPB13.mb.66cbin.1        | 41.40 | Lachnospiraceae    | 10666  | 2600521 |
| Sample_SPB13.mb.4cbin.1         | 31.30 | Firmicutes         | 63164  | 2478475 |
| Sample_SPB13.Cluster2682cbin.1  | 45.80 | Bacteroidales      | 118345 | 3619316 |
| Sample_SPB13.Cluster2803cbin.1  | 45.40 | Bacteroidales      | 68270  | 3798710 |
| Sample_SPB13.mb.59              | 43.30 | Bacteroidales      | 339293 | 3159156 |
| Sample_SPB13.mb.67cbin.1        | 41.90 | Lachnospiraceae    | 63154  | 2366680 |



|                                |       |                    |        |         |
|--------------------------------|-------|--------------------|--------|---------|
| Sample_SPB13.Cluster6576cbin.1 | 41.70 | Bacteroidales      | 34613  | 4492546 |
| Sample_SPB13.mb.74             | 59.20 | Bacteroidetes      | 123012 | 2860748 |
| Sample_SPB13.mb.31cbin.1       | 45.10 | Bacteroidales      | 73843  | 4533994 |
| Sample_SPB13.mb.63             | 48.50 | Bacteroidales      | 174277 | 3600162 |
| Sample_SPB15.Cluster11681      | 24.10 | Bacteria           | 51749  | 938645  |
| Sample_SPB15.mb.5cbin.1        | 25.30 | Bacteria           | 59878  | 1247784 |
| Sample_SPB15.Cluster5cbin.1    | 49.00 | Clostridiales      | 29340  | 2129781 |
| Sample_SPB15.mb.18             | 63.60 | Clostridiales      | 10289  | 1858052 |
| Sample_SPB15.mb.44cbin.1       | 53.60 | Clostridia         | 22865  | 1781810 |
| Sample_SPB15.Cluster10967      | 37.70 | Clostridiales      | 242807 | 2208747 |
| Sample_SPB15.Cluster34         | 62.30 | Clostridiales      | 10699  | 1338409 |
| Sample_SPB15.mb.67             | 51.80 | Clostridiales      | 10204  | 1749994 |
| Sample_SPB15.Cluster362cbin.1  | 60.10 | Clostridiales      | 103640 | 1788391 |
| Sample_SPB15.mb.65             | 59.90 | Clostridiales      | 17993  | 2093119 |
| Sample_SPB15.mb.22cbin.1       | 59.50 | Clostridiales      | 19278  | 2027232 |
| Sample_SPB15.mb.48             | 58.50 | Clostridiales      | 17628  | 1681121 |
| Sample_SPB15.mb.25             | 57.50 | Clostridiales      | 11352  | 1945130 |
| Sample_SPB15.mb.35             | 51.80 | Bacteroidetes      | 36374  | 3011670 |
| Sample_SPB15.Cluster4864cbin.1 | 49.60 | Clostridiales      | 153353 | 2478688 |
| Sample_SPB15.mb.33cbin.1       | 59.40 | Clostridiales      | 10055  | 2305540 |
| Sample_SPB15.mb.50cbin.1       | 57.00 | Clostridiales      | 107095 | 1822576 |
| Sample_SPB15.mb.64             | 63.90 | Clostridiales      | 60910  | 2216108 |
| Sample_SPB15.Cluster1660cbin.1 | 53.40 | Clostridiales      | 30932  | 2019141 |
| Sample_SPB15.mb.3              | 40.70 | Lachnospiraceae    | 17133  | 2723097 |
| Sample_SPB15.mb.53             | 38.60 | Clostridiales      | 32444  | 2052143 |
| Sample_SPB15.mb.60cbin.1       | 57.10 | Clostridiales      | 203872 | 1884448 |
| Sample_SPB15.mb.58cbin.1       | 45.80 | Lachnospiraceae    | 34106  | 3312834 |
| Sample_SPB15.mb.73cbin.1       | 45.70 | Clostridiales      | 50267  | 2521484 |
| Sample_SPB15.mb.84cbin.1       | 51.60 | Clostridiales      | 175604 | 2214420 |
| Sample_SPB15.mb.37             | 50.90 | Enterobacteriaceae | 140187 | 4631367 |
| Sample_SPB16.mb.47             | 28.30 | Bacteria           | 58609  | 1456494 |
| Sample_SPB16.mb.43             | 26.90 | Bacteria           | 29316  | 2936985 |
| Sample_SPB16.mb.23cbin.1       | 48.90 | Clostridiales      | 8055   | 2421276 |
| Sample_SPB16.Cluster7479cbin.1 | 33.70 | Bacteria           | 5881   | 1849358 |
| Sample_SPB16.mb.66             | 59.30 | Clostridiales      | 16445  | 1937108 |
| Sample_SPB16.mb.58             | 45.10 | Lachnospiraceae    | 187409 | 2415767 |
| Sample_SPB16.Cluster975cbin.1  | 57.20 | Proteobacteria     | 26558  | 2015373 |
| Sample_SPB16.mb.40cbin.1       | 44.90 | Clostridiales      | 11560  | 2258397 |
| Sample_SPB16.Cluster7012       | 37.30 | Clostridiales      | 257704 | 2139916 |
| Sample_SPB16.mb.30cbin.1       | 44.80 | Clostridiales      | 12230  | 2316563 |
| Sample_SPB16.mb.53             | 41.90 | Clostridiales      | 124578 | 2313021 |
| Sample_SPB16.Cluster273        | 60.40 | Bifidobacteriaceae | 109653 | 1909350 |
| Sample_SPB16.mb.74cbin.1       | 60.80 | Clostridiales      | 9934   | 2324876 |
| Sample_SPB16.Cluster8301       | 32.50 | Lactobacillales    | 117526 | 1876781 |
| Sample_SPB16.mb.37cbin.1       | 45.10 | Prevotella         | 14371  | 3108234 |
| Sample_SPB16.mb.19cbin.1       | 37.30 | Clostridiales      | 132061 | 2627222 |
| Sample_SPB16.Cluster7212cbin.1 | 40.00 | Streptococcus      | 20248  | 2000123 |
| Sample_SPB16.Cluster5972cbin.1 | 41.10 | Lachnospiraceae    | 101652 | 3190854 |
| Sample_SPB16.mb.4cbin.1        | 39.60 | Pasteurellaceae    | 7819   | 1690453 |
| Sample_SPB16.mb.5              | 41.50 | Lachnospiraceae    | 62929  | 3370454 |
| Sample_SPB16.Cluster3018cbin.1 | 44.10 | Bacteroidales      | 67892  | 3884137 |
| Sample_SPB16.Cluster6185cbin.1 | 42.50 | Bacteroides        | 11740  | 4024715 |
| Sample_SPB17.mb.23             | 60.20 | Bifidobacteriaceae | 34926  | 2040292 |
| Sample_SPB17.Cluster126cbin.1  | 56.30 | Bifidobacteriaceae | 74471  | 2187213 |
| Sample_SPB17.mb.15cbin.1       | 58.80 | Bifidobacteriaceae | 32976  | 2276157 |
| Sample_SPB17.Cluster17cbin.1   | 57.80 | Clostridiales      | 35590  | 2887662 |
| Sample_SPB17.mb.18             | 38.00 | Lactobacillales    | 26349  | 2504348 |
| Sample_SPB17.mb.5cbin.1        | 42.70 | Lachnospiraceae    | 96252  | 3077216 |

|                                 |       |                    |        |         |
|---------------------------------|-------|--------------------|--------|---------|
| Sample_SPB17.mb.39cbin.1        | 45.20 | Bacteroidales      | 104937 | 4275117 |
| Sample_SPB17.Cluster866         | 44.80 | Bacteroidales      | 217147 | 4537333 |
| Sample_SPB17.mb.46cbin.1        | 42.00 | Bacteroidales      | 107106 | 4756685 |
| Sample_SPB20.mb.3               | 30.30 | Bacteria           | 165171 | 1663990 |
| Sample_SPB20.mb.5               | 26.70 | Bacteria           | 71894  | 1221966 |
| Sample_SPB20.mb.48              | 51.20 | Clostridiales      | 15769  | 1775021 |
| Sample_SPB20.mb.8               | 26.00 | Bacteria           | 115990 | 1103713 |
| Sample_SPB20.Cluster4644cbin.1  | 44.70 | Clostridiales      | 14467  | 1712082 |
| Sample_SPB20.Cluster2764cbin.1  | 48.70 | Firmicutes         | 32775  | 1921612 |
| Sample_SPB20.mb.54cbin.1        | 48.50 | Clostridiales      | 26980  | 2689421 |
| Sample_SPB20.Cluster56cbin.1    | 60.90 | Bifidobacteriaceae | 10460  | 1682857 |
| Sample_SPB20.mb.90              | 38.30 | Clostridiales      | 7172   | 2225605 |
| Sample_SPB20.mb.22              | 54.80 | Bacteroidetes      | 85438  | 2112583 |
| Sample_SPB20.Cluster1848cbin.1  | 55.20 | Bacteria           | 126487 | 2794681 |
| Sample_SPB20.Cluster9206        | 40.50 | Clostridiales      | 312808 | 2099710 |
| Sample_SPB20.mb.24cbin.1        | 47.50 | Lachnospiraceae    | 16431  | 2976033 |
| Sample_SPB20.mb.93              | 48.50 | Clostridiales      | 61684  | 2413188 |
| Sample_SPB20.Cluster379         | 59.90 | Bifidobacteriaceae | 183492 | 2177293 |
| Sample_SPB20.mb.64              | 34.20 | Bacteria           | 25577  | 2136506 |
| Sample_SPB20.mb.2               | 45.60 | Clostridiales      | 59490  | 2473222 |
| Sample_SPB20.mb.67              | 59.90 | Actinobacteria     | 20324  | 2042560 |
| Sample_SPB20.mb.92              | 56.40 | Clostridiales      | 62717  | 2560167 |
| Sample_SPB20.mb.107             | 37.60 | Clostridiales      | 33704  | 2404194 |
| Sample_SPB20.mb.46cbin.1        | 42.30 | Clostridiales      | 7745   | 2273080 |
| Sample_SPB20.mb.77              | 61.20 | Clostridiales      | 17558  | 2056784 |
| Sample_SPB20.mb.53              | 58.90 | Clostridiales      | 21786  | 2016555 |
| Sample_SPB20.Cluster7098cbin.1  | 42.40 | Lachnospiraceae    | 92835  | 3182042 |
| Sample_SPB20.mb.94cbin.1        | 51.00 | Clostridiales      | 111087 | 2718168 |
| Sample_SPB20.mb.33              | 26.80 | Clostridiales      | 59396  | 2776684 |
| Sample_SPB20.mb.87              | 54.20 | Clostridiales      | 25792  | 1727702 |
| Sample_SPB20.mb.62cbin.1        | 45.00 | Prevotella         | 20222  | 3127584 |
| Sample_SPB20.mb.45cbin.1        | 42.70 | Lachnospiraceae    | 198625 | 3530398 |
| Sample_SPB20.mb.44              | 43.60 | Bacteroidales      | 187906 | 2839522 |
| Sample_SPB20.mb.36              | 59.00 | Bacteroidetes      | 134685 | 2980813 |
| Sample_SPB20.mb.63              | 36.90 | Clostridiales      | 41081  | 2805983 |
| Sample_SPB20.mb.16              | 44.80 | Bacteroidales      | 52936  | 3175129 |
| Sample_SPB20.mb.72              | 40.40 | Lachnospiraceae    | 78393  | 2712351 |
| Sample_SPB20.mb.60              | 46.70 | Bacteroidales      | 57205  | 3178601 |
| Sample_SPB20.Cluster4561cbin.1  | 45.50 | Bacteroidales      | 79847  | 3814164 |
| Sample_SPB20.mb.95              | 40.60 | Bacteroidales      | 34230  | 3056862 |
| Sample_SPB20.Cluster566         | 57.70 | Enterobacteriaceae | 226484 | 5104542 |
| Sample_SPB21.Cluster4534        | 50.10 | Bacteria           | 87208  | 2064598 |
| Sample_SPB21.mb.107cbin.1       | 29.60 | Bacteria           | 10403  | 1328766 |
| Sample_SPB21.Cluster14434       | 35.10 | Bacteria           | 109223 | 2235037 |
| Sample_SPB21.mb.14              | 49.40 | Clostridiales      | 112791 | 1979794 |
| Sample_SPB21.mb.1cbin.1         | 58.20 | Clostridiales      | 55672  | 3106953 |
| Sample_SPB21.Cluster7341cbin.1  | 46.60 | Clostridiales      | 55585  | 1790678 |
| Sample_SPB21.Cluster9839cbin.1  | 43.20 | Clostridiales      | 52557  | 3157984 |
| Sample_SPB21.mb.22              | 32.30 | Clostridiales      | 90546  | 2794169 |
| Sample_SPB21.mb.43              | 55.90 | Clostridiales      | 12072  | 2036345 |
| Sample_SPB21.mb.103cbin.1       | 45.10 | Clostridiales      | 70340  | 2554410 |
| Sample_SPB21.mb.95              | 61.70 | Bacteria           | 44235  | 1753442 |
| Sample_SPB21.mb.29cbin.1        | 48.30 | Clostridiales      | 27036  | 2805952 |
| Sample_SPB21.mb.48              | 43.90 | Clostridiales      | 139516 | 2970711 |
| Sample_SPB21.mb.38              | 41.40 | Lachnospiraceae    | 17117  | 2354177 |
| Sample_SPB21.mb.101             | 54.70 | Bacteroidetes      | 149081 | 2098357 |
| Sample_SPB21.mb.45cbin.1        | 58.10 | Clostridiales      | 19741  | 2205560 |
| Sample_SPB21.Cluster10842cbin.1 | 40.10 | Clostridiales      | 129656 | 2321966 |

|                                 |       |                     |        |         |
|---------------------------------|-------|---------------------|--------|---------|
| Sample_SPB21.mb.55              | 61.90 | Clostridiales       | 51090  | 1841864 |
| Sample_SPB21.Cluster10257cbin.1 | 42.70 | Lachnospiraceae     | 41548  | 2430987 |
| Sample_SPB21.Cluster563cbin.1   | 58.80 | Bacteroidetes       | 103893 | 3005580 |
| Sample_SPB21.mb.64              | 54.60 | Clostridiales       | 17368  | 2655648 |
| Sample_SPB21.mb.85              | 36.40 | Clostridiales       | 139715 | 1869092 |
| Sample_SPB21.mb.42              | 43.90 | Selenomonadales     | 17228  | 2148614 |
| Sample_SPB21.mb.20              | 40.60 | Clostridiales       | 130002 | 2614381 |
| Sample_SPB21.mb.52              | 56.20 | Clostridiales       | 14966  | 2476129 |
| Sample_SPB21.Cluster9992        | 41.30 | Lachnospiraceae     | 67279  | 2893316 |
| Sample_SPB21.mb.44              | 41.30 | Clostridiales       | 201546 | 2527110 |
| Sample_SPB21.Cluster8593cbin.1  | 43.70 | Bacteroidales       | 133922 | 2709981 |
| Sample_SPB21.mb.33              | 26.80 | Clostridiales       | 41465  | 2677103 |
| Sample_SPB21.mb.96              | 53.70 | Clostridiales       | 143872 | 2377767 |
| Sample_SPB21.mb.99              | 41.40 | Lachnospiraceae     | 82545  | 3169572 |
| Sample_SPB21.mb.57cbin.1        | 43.30 | Lachnospiraceae     | 67753  | 2996794 |
| Sample_SPB21.Cluster8466        | 43.20 | Bacteria            | 25844  | 3925439 |
| Sample_SPB21.mb.78cbin.1        | 59.10 | Bacteroidetes       | 152166 | 3016675 |
| Sample_SPB21.mb.40cbin.1        | 44.70 | Bacteroidales       | 66971  | 3007944 |
| Sample_SPB21.mb.86              | 44.50 | Clostridiales       | 159822 | 2545584 |
| Sample_SPB21.Cluster6847cbin.1  | 46.60 | Bacteroidales       | 105482 | 3951458 |
| Sample_SPB21.Cluster6428        | 45.10 | Bacteroidales       | 49199  | 4430584 |
| Sample_SPB21.mb.70              | 40.60 | Bacteroidales       | 44839  | 3242507 |
| Sample_SPB21.mb.83cbin.1        | 48.50 | Bacteroidales       | 107958 | 3825815 |
| Sample_SPB22.Cluster12841cbin.1 | 27.20 | Bacteria            | 150205 | 1125243 |
| Sample_SPB22.Cluster12951       | 28.40 | Bacteria            | 408707 | 1667130 |
| Sample_SPB22.mb.103             | 24.50 | Bacteria            | 16177  | 930499  |
| Sample_SPB22.Cluster12921cbin.1 | 28.30 | Clostridiales       | 103855 | 1389779 |
| Sample_SPB22.Cluster5512cbin.1  | 49.30 | Clostridiales       | 96193  | 2018769 |
| Sample_SPB22.Cluster7098cbin.1  | 45.00 | Clostridiales       | 11652  | 1591135 |
| Sample_SPB22.Cluster9389        | 34.90 | Bacteria            | 69807  | 1486387 |
| Sample_SPB22.mb.2cbin.1         | 61.40 | Bacteria            | 47021  | 2145465 |
| Sample_SPB22.mb.38              | 52.90 | Clostridia          | 53757  | 2067248 |
| Sample_SPB22.mb.11              | 56.70 | Clostridiales       | 55762  | 2628849 |
| Sample_SPB22.Cluster3071        | 54.50 | Bacteroidetes       | 95663  | 1964889 |
| Sample_SPB22.Cluster4341cbin.1  | 51.50 | Clostridiales       | 116434 | 1959042 |
| Sample_SPB22.mb.53              | 59.50 | Clostridiales       | 136464 | 2145979 |
| Sample_SPB22.mb.88              | 29.60 | Bacteria            | 134723 | 1265673 |
| Sample_SPB22.Cluster10662cbin.1 | 40.60 | Clostridiales       | 112278 | 2132697 |
| Sample_SPB22.mb.15cbin.1        | 51.80 | Bacteria            | 9140   | 4983952 |
| Sample_SPB22.mb.30cbin.1        | 57.70 | Clostridiales       | 12201  | 2528994 |
| Sample_SPB22.Cluster7923        | 44.00 | Clostridiales       | 125030 | 2373993 |
| Sample_SPB22.Cluster542         | 60.50 | Bifidobacteriaceae  | 57871  | 1897590 |
| Sample_SPB22.mb.86              | 52.50 | Clostridiales       | 60169  | 2082653 |
| Sample_SPB22.mb.28              | 46.70 | Lachnospiraceae     | 68930  | 2922101 |
| Sample_SPB22.mb.34              | 45.30 | Clostridiales       | 6766   | 1747850 |
| Sample_SPB22.mb.47              | 46.60 | Clostridiales       | 16191  | 2288233 |
| Sample_SPB22.mb.83              | 58.30 | Clostridiales       | 57846  | 2881856 |
| Sample_SPB22.Cluster1106cbin.1  | 55.40 | Proteobacteria      | 9832   | 2509326 |
| Sample_SPB22.mb.74              | 57.20 | Clostridiales       | 73382  | 1961084 |
| Sample_SPB22.Cluster888         | 57.70 | Bacteria            | 203207 | 3075709 |
| Sample_SPB22.mb.24              | 44.50 | Clostridiales       | 136048 | 2265319 |
| Sample_SPB22.mb.100             | 37.40 | Clostridiales       | 104694 | 2643412 |
| Sample_SPB22.mb.57              | 60.30 | Bacteroidetes       | 77921  | 2546495 |
| Sample_SPB22.mb.92              | 41.80 | Lachnospiraceae     | 212621 | 2070537 |
| Sample_SPB22.Cluster11789cbin.1 | 43.00 | Bacteria            | 7903   | 3688322 |
| Sample_SPB22.mb.42              | 60.60 | Deltaproteobacteria | 7564   | 3366540 |
| Sample_SPB22.mb.80              | 46.00 | Bacteroidetes       | 197257 | 2461142 |
| Sample_SPB22.Cluster5885        | 45.50 | Bacteroidales       | 46318  | 3768896 |

|                                 |       |                     |        |         |
|---------------------------------|-------|---------------------|--------|---------|
| Sample_SPB22.mb.72              | 41.70 | Lachnospiraceae     | 87246  | 2342927 |
| Sample_SPB22.mb.55              | 43.40 | Bacteroidales       | 124265 | 3168790 |
| Sample_SPB22.mb.36              | 46.50 | Bacteroidales       | 72878  | 3508060 |
| Sample_SPB22.Cluster5410cbin.1  | 45.50 | Bacteroidales       | 29491  | 4510906 |
| Sample_SPB22.mb.73              | 41.90 | Bacteroidales       | 53964  | 4183112 |
| Sample_SPB25.Cluster14413       | 24.60 | Bacteria            | 23923  | 948540  |
| Sample_SPB25.Cluster6862        | 46.60 | Clostridiales       | 317558 | 1597482 |
| Sample_SPB25.Cluster2209cbin.1  | 62.50 | Clostridia          | 19686  | 2893827 |
| Sample_SPB25.Cluster557         | 60.20 | Actinobacteria      | 87341  | 1641065 |
| Sample_SPB25.mb.14              | 51.90 | Clostridiales       | 10419  | 1886336 |
| Sample_SPB25.Cluster13262cbin.1 | 33.50 | Bacteria            | 26748  | 2289779 |
| Sample_SPB25.mb.51              | 56.60 | Clostridia          | 7219   | 2181301 |
| Sample_SPB25.mb.12              | 54.40 | Actinobacteria      | 147385 | 1685500 |
| Sample_SPB25.mb.20cbin.1        | 59.10 | Clostridiales       | 44866  | 2245901 |
| Sample_SPB25.Cluster6772        | 44.50 | Clostridiales       | 32023  | 2337580 |
| Sample_SPB25.mb.52              | 58.20 | Clostridiales       | 43015  | 2958305 |
| Sample_SPB25.mb.26              | 54.80 | Clostridiales       | 139133 | 3060127 |
| Sample_SPB25.mb.18cbin.1        | 64.70 | Deltaproteobacteria | 5704   | 1939207 |
| Sample_SPB25.Cluster13419cbin.1 | 27.00 | Clostridiales       | 15602  | 2851409 |
| Sample_SPB25.mb.32              | 41.00 | Clostridiales       | 42331  | 1991210 |
| Sample_SPB25.mb.48cbin.1        | 53.50 | Clostridiales       | 76746  | 2391440 |
| Sample_SPB25.Cluster11630cbin.1 | 38.20 | Lactobacillales     | 100025 | 1976061 |
| Sample_SPB25.mb.38              | 58.10 | Bacteroidetes       | 111349 | 2570401 |
| Sample_SPB25.mb.67              | 58.90 | Clostridiales       | 9278   | 1608452 |
| Sample_SPB25.mb.24cbin.1        | 42.90 | Clostridiales       | 11426  | 2571523 |
| Sample_SPB25.Cluster677         | 58.50 | Bacteroidetes       | 110962 | 3085037 |
| Sample_SPB25.Cluster228cbin.1   | 58.90 | Bacteroidetes       | 108634 | 2817611 |
| Sample_SPB25.mb.65              | 53.90 | Clostridiales       | 8707   | 1767287 |
| Sample_SPB25.mb.74              | 42.50 | Lachnospiraceae     | 28277  | 1845048 |
| Sample_SPB25.mb.91cbin.1        | 36.50 | Clostridiales       | 28365  | 2969011 |
| Sample_SPB25.mb.31              | 37.60 | Lactobacillales     | 102201 | 2803410 |
| Sample_SPB25.mb.92              | 47.80 | Clostridiales       | 44684  | 1916159 |
| Sample_SPB25.Cluster6849cbin.1  | 46.50 | Bacteroidales       | 118622 | 4188219 |
| Sample_SPB25.mb.83cbin.1        | 45.00 | Clostridiales       | 123245 | 2608080 |
| Sample_SPB25.mb.82cbin.1        | 45.10 | Lactobacillales     | 32385  | 2092994 |
| Sample_SPB25.mb.81              | 28.90 | Clostridiales       | 54224  | 2566961 |
| Sample_SPB25.mb.77              | 38.60 | Lactobacillales     | 102139 | 3087238 |
| Sample_SPB25.Cluster7636cbin.1  | 41.80 | Bacteroidales       | 83690  | 4894818 |
| Sample_SPB25.Cluster6850cbin.1  | 41.80 | Bacteroides         | 101079 | 5165813 |
| Sample_SPB25.mb.68              | 64.20 | Actinobacteria      | 173393 | 3184157 |
| Sample_SPB25.mb.62cbin.1        | 42.80 | Lactobacillales     | 15479  | 3420545 |
| Sample_SPB25.mb.95cbin.1        | 56.00 | Enterobacteriaceae  | 48700  | 4758027 |
| Sample_SPB26.Cluster13102       | 25.20 | Bacteria            | 132268 | 1268239 |
| Sample_SPB26.Cluster128cbin.1   | 58.30 | Clostridiales       | 73800  | 1887161 |
| Sample_SPB26.Cluster1230cbin.1  | 60.50 | Euryarchaeota       | 157734 | 1853734 |
| Sample_SPB26.Cluster1477cbin.1  | 57.10 | Clostridiales       | 72834  | 1929545 |
| Sample_SPB26.mb.27cbin.1        | 54.00 | Clostridiales       | 15943  | 1658979 |
| Sample_SPB26.Cluster12694       | 30.00 | Euryarchaeota       | 29270  | 1573727 |
| Sample_SPB26.Cluster7424        | 46.10 | Bacteria            | 168999 | 2571837 |
| Sample_SPB26.mb.30              | 52.90 | Clostridia          | 75390  | 2083820 |
| Sample_SPB26.mb.117             | 60.00 | Clostridiales       | 72047  | 1971984 |
| Sample_SPB26.Cluster11079       | 40.60 | Clostridiales       | 186632 | 2027785 |
| Sample_SPB26.Cluster4030        | 52.60 | Clostridiales       | 137513 | 2317922 |
| Sample_SPB26.Cluster787         | 58.60 | Veillonellaceae     | 100618 | 2298580 |
| Sample_SPB26.Cluster948cbin.1   | 59.60 | Actinobacteria      | 79876  | 2251989 |
| Sample_SPB26.Cluster503cbin.1   | 60.30 | Bifidobacteriaceae  | 95915  | 1972091 |
| Sample_SPB26.Cluster1166cbin.1  | 57.60 | Bacteria            | 145355 | 3195654 |
| Sample_SPB26.mb.103             | 59.80 | Bacteroidetes       | 117994 | 2520917 |

|                                 |       |                     |        |         |
|---------------------------------|-------|---------------------|--------|---------|
| Sample_SPB26.mb.65              | 58.30 | Clostridiales       | 46240  | 2910421 |
| Sample_SPB26.mb.37              | 59.70 | Bacteria            | 72127  | 4172617 |
| Sample_SPB26.Cluster11740cbin.1 | 36.40 | Lactobacillus       | 56560  | 2183732 |
| Sample_SPB26.mb.73cbin.1        | 49.40 | Bacteria            | 9046   | 1742373 |
| Sample_SPB26.Cluster96          | 63.10 | Deltaproteobacteria | 78434  | 2662176 |
| Sample_SPB26.mb.12              | 51.50 | Clostridiales       | 158664 | 2171616 |
| Sample_SPB26.Cluster10643cbin.1 | 43.30 | Bacteroidales       | 163551 | 2846544 |
| Sample_SPB26.mb.112             | 50.60 | Bacteroidales       | 25964  | 2216908 |
| Sample_SPB26.mb.16              | 54.60 | Bacteroidales       | 47638  | 2119015 |
| Sample_SPB26.mb.7               | 55.40 | Euryarchaeota       | 32046  | 1913960 |
| Sample_SPB26.Cluster7918cbin.1  | 43.20 | Bacteria            | 78777  | 4089311 |
| Sample_SPB26.mb.88              | 52.00 | Bacteria            | 9660   | 4289306 |
| Sample_SPB26.mb.34cbin.1        | 41.20 | Lachnospiraceae     | 107087 | 2973734 |
| Sample_SPB26.mb.33              | 46.30 | Bacteroidales       | 24928  | 2836907 |
| Sample_SPB26.mb.92              | 55.40 | Bacteroidetes       | 54405  | 2462643 |
| Sample_SPB26.mb.23              | 43.90 | Bacteroidales       | 61782  | 3365571 |
| Sample_SPB26.mb.77              | 58.90 | Bifidobacteriaceae  | 53781  | 2127265 |
| Sample_SPB26.Cluster9006cbin.1  | 45.20 | Bacteroidales       | 26433  | 4376239 |
| Sample_SPB26.mb.91              | 43.90 | Clostridiales       | 75615  | 2907450 |
| Sample_SPB26.mb.69              | 45.60 | Bacteroidales       | 22984  | 3262982 |
| Sample_SPB26.Cluster1013cbin.1  | 56.70 | Enterobacteriaceae  | 49023  | 5708667 |
| Sample_SPB27.Cluster2043cbin.1  | 49.50 | Clostridiales       | 101977 | 2079966 |
| Sample_SPB27.Cluster3466cbin.1  | 44.20 | Clostridiales       | 7137   | 1549445 |
| Sample_SPB27.mb.25cbin.1        | 58.10 | Clostridiales       | 60508  | 3053808 |
| Sample_SPB27.mb.24cbin.1        | 37.10 | Clostridiales       | 46675  | 2659603 |
| Sample_SPB27.mb.40cbin.1        | 55.80 | Clostridiales       | 6346   | 1951667 |
| Sample_SPB27.mb.27cbin.1        | 59.80 | Clostridiales       | 81443  | 2103055 |
| Sample_SPB27.Cluster2426cbin.1  | 46.70 | Lactobacillales     | 40233  | 1943122 |
| Sample_SPB27.mb.19cbin.1        | 46.30 | Clostridiales       | 39653  | 2069948 |
| Sample_SPB27.Cluster1597cbin.1  | 48.60 | Firmicutes          | 36707  | 1812760 |
| Sample_SPB27.Cluster210cbin.1   | 55.80 | Clostridiales       | 16237  | 2536304 |
| Sample_SPB27.Cluster57cbin.1    | 60.30 | Clostridiales       | 52184  | 2396674 |
| Sample_SPB27.Cluster6184        | 38.40 | Clostridiales       | 79985  | 2010368 |
| Sample_SPB27.mb.21              | 54.70 | Bacteroidetes       | 168153 | 2107882 |
| Sample_SPB27.Cluster1327        | 52.80 | Clostridiales       | 136896 | 2332374 |
| Sample_SPB27.mb.42              | 59.30 | Clostridiales       | 43073  | 2134455 |
| Sample_SPB27.mb.22              | 41.20 | Clostridiales       | 145631 | 2490140 |
| Sample_SPB27.mb.45              | 49.00 | Clostridiales       | 13088  | 2645033 |
| Sample_SPB27.mb.26cbin.1        | 60.10 | Bifidobacteriaceae  | 171006 | 2283044 |
| Sample_SPB27.Cluster5753cbin.1  | 37.20 | Clostridiales       | 99832  | 2938785 |
| Sample_SPB27.mb.56              | 27.20 | Clostridiales       | 10426  | 2661761 |
| Sample_SPB27.mb.77cbin.1        | 60.60 | Bacteria            | 9728   | 2172559 |
| Sample_SPB27.mb.34cbin.1        | 49.00 | Proteobacteria      | 48915  | 2020976 |
| Sample_SPB27.mb.66cbin.1        | 51.20 | Lachnospiraceae     | 87864  | 2938035 |
| Sample_SPB27.mb.70              | 42.70 | Clostridiales       | 13621  | 2304830 |
| Sample_SPB27.Cluster2757cbin.1  | 43.30 | Bacteria            | 7123   | 3510933 |
| Sample_SPB27.mb.52cbin.1        | 42.70 | Lachnospiraceae     | 113061 | 3220059 |
| Sample_SPB27.mb.29              | 58.80 | Bacteroidetes       | 124653 | 2687055 |
| Sample_SPB27.mb.38              | 41.70 | Lachnospiraceae     | 73794  | 2302639 |
| Sample_SPB27.mb.88              | 60.00 | Bacteroidetes       | 106328 | 2396295 |
| Sample_SPB27.mb.63              | 58.80 | Bacteroidetes       | 235890 | 2918846 |
| Sample_SPB27.Cluster2220        | 49.20 | Clostridiales       | 193235 | 7025057 |
| Sample_SPB27.mb.10              | 46.60 | Bacteroidales       | 172786 | 3929664 |
| Sample_SPB27.Cluster4319cbin.1  | 45.40 | Bacteroidales       | 79679  | 4483437 |
| Sample_SPB27.mb.48cbin.1        | 44.40 | Bacteroidales       | 74229  | 3901418 |
| Sample_SPB27.mb.54              | 41.90 | Bacteroides         | 86628  | 4566795 |
| Sample_SPB28.mb.43              | 38.40 | Clostridiales       | 12425  | 2466723 |
| Sample_SPB28.Cluster2207cbin.1  | 44.60 | Selenomonadales     | 5948   | 1709534 |

|                                |       |                     |        |         |
|--------------------------------|-------|---------------------|--------|---------|
| Sample_SPB28.Cluster212        | 59.60 | Actinobacteria      | 69431  | 2192929 |
| Sample_SPB28.mb.30cbin.1       | 48.60 | Clostridiales       | 15748  | 2565071 |
| Sample_SPB28.Cluster6615cbin.1 | 42.40 | Clostridiales       | 11429  | 2485855 |
| Sample_SPB28.Cluster7542       | 41.00 | Clostridiales       | 80107  | 1989659 |
| Sample_SPB28.Cluster6082       | 44.20 | Clostridiales       | 277886 | 2691609 |
| Sample_SPB28.mb.19             | 54.80 | Bacteroidetes       | 42927  | 2124220 |
| Sample_SPB28.Cluster9014cbin.1 | 38.90 | Clostridiales       | 73326  | 2123106 |
| Sample_SPB28.Cluster5597cbin.1 | 41.40 | Lachnospiraceae     | 21636  | 2768993 |
| Sample_SPB28.mb.47             | 56.30 | Clostridiales       | 15698  | 2416352 |
| Sample_SPB28.mb.70cbin.1       | 54.30 | Clostridiales       | 27419  | 1700088 |
| Sample_SPB28.mb.57             | 60.60 | Clostridiales       | 46263  | 2293754 |
| Sample_SPB28.mb.78cbin.1       | 33.80 | Bacteria            | 41572  | 2420141 |
| Sample_SPB28.mb.35             | 44.80 | Clostridiales       | 41086  | 2817243 |
| Sample_SPB28.Cluster4850cbin.1 | 49.10 | Bacteroidales       | 10654  | 3075883 |
| Sample_SPB28.mb.56             | 37.60 | Clostridiales       | 30302  | 2511863 |
| Sample_SPB28.mb.13             | 48.60 | Proteobacteria      | 38842  | 2556966 |
| Sample_SPB28.mb.51cbin.1       | 31.30 | Firmicutes          | 48094  | 2067557 |
| Sample_SPB28.mb.71cbin.1       | 43.40 | Lachnospiraceae     | 92485  | 3080962 |
| Sample_SPB28.mb.89cbin.1       | 56.70 | Bifidobacteriaceae  | 30920  | 2039597 |
| Sample_SPB28.mb.65             | 39.50 | Pasteurellaceae     | 49308  | 1875575 |
| Sample_SPB28.Cluster4528cbin.1 | 45.60 | Bacteroidales       | 15494  | 3916207 |
| Sample_SPB28.mb.32cbin.1       | 43.30 | Bacteria            | 9840   | 3781860 |
| Sample_SPB28.Cluster35         | 58.00 | Enterobacteriaceae  | 110649 | 4831559 |
| Sample_SPB30.Cluster3079cbin.1 | 45.10 | Bacteria            | 10593  | 4274136 |
| Sample_SPB30.Cluster4134       | 49.40 | Clostridiales       | 96015  | 1976242 |
| Sample_SPB30.Cluster814cbin.1  | 58.00 | Clostridiales       | 62816  | 3012625 |
| Sample_SPB30.Cluster9210       | 37.80 | Clostridiales       | 90067  | 1854831 |
| Sample_SPB30.Cluster3409cbin.1 | 48.00 | Firmicutes          | 35228  | 1633438 |
| Sample_SPB30.Cluster2181       | 54.90 | Bacteroidetes       | 168681 | 1925907 |
| Sample_SPB30.mb.19             | 59.50 | Actinobacteria      | 103828 | 1656974 |
| Sample_SPB30.mb.68             | 43.50 | Clostridiales       | 5229   | 1818561 |
| Sample_SPB30.Cluster3620       | 51.10 | Clostridiales       | 316753 | 2228477 |
| Sample_SPB30.mb.27cbin.1       | 58.80 | Deltaproteobacteria | 28417  | 2427290 |
| Sample_SPB30.Cluster1481cbin.1 | 59.50 | Bifidobacteriaceae  | 21303  | 2109618 |
| Sample_SPB30.Cluster10678      | 32.70 | Lactobacillales     | 45553  | 1806439 |
| Sample_SPB30.Cluster422cbin.1  | 60.40 | Bifidobacteriaceae  | 125212 | 1889943 |
| Sample_SPB30.mb.22             | 58.40 | Bacteroidetes       | 355189 | 2357254 |
| Sample_SPB30.mb.35             | 41.10 | Clostridiales       | 9895   | 1897697 |
| Sample_SPB30.mb.34cbin.1       | 55.80 | Clostridiales       | 13602  | 2385790 |
| Sample_SPB30.mb.47cbin.1       | 60.90 | Clostridiales       | 57249  | 2827986 |
| Sample_SPB30.mb.70             | 62.80 | Clostridiales       | 13536  | 1684892 |
| Sample_SPB30.mb.5cbin.1        | 50.60 | Clostridiales       | 28575  | 2507706 |
| Sample_SPB30.mb.43             | 60.70 | Clostridiales       | 12855  | 2359832 |
| Sample_SPB30.mb.29             | 55.70 | Bacteria            | 202254 | 2737149 |
| Sample_SPB30.mb.80             | 59.20 | Clostridiales       | 19975  | 2004257 |
| Sample_SPB30.mb.31             | 45.50 | Prevotella          | 28273  | 3019849 |
| Sample_SPB30.mb.26             | 36.00 | Clostridiales       | 68981  | 2543660 |
| Sample_SPB30.mb.57cbin.1       | 59.40 | Bacteroidetes       | 230334 | 2625000 |
| Sample_SPB30.mb.58cbin.1       | 46.90 | Proteobacteria      | 135688 | 1888030 |
| Sample_SPB30.mb.41cbin.1       | 43.70 | Lachnospiraceae     | 41989  | 3031369 |
| Sample_SPB30.Cluster8968       | 37.30 | Lactobacillales     | 40850  | 2719397 |
| Sample_SPB30.Cluster4912cbin.1 | 43.30 | Bacteria            | 54527  | 4165177 |
| Sample_SPB30.mb.74             | 54.40 | Bacteroidetes       | 323173 | 2614239 |
| Sample_SPB30.mb.46cbin.1       | 59.30 | Bacteroidetes       | 149383 | 2716624 |
| Sample_SPB30.mb.81cbin.1       | 38.90 | Clostridiales       | 76356  | 2023654 |
| Sample_SPB30.mb.92             | 55.60 | Clostridiales       | 58130  | 3338083 |
| Sample_SPB30.mb.72             | 36.70 | Lactobacillales     | 85236  | 1955979 |
| Sample_SPB30.mb.93             | 44.20 | Clostridiales       | 9877   | 2786430 |

|                                 |       |                    |        |         |
|---------------------------------|-------|--------------------|--------|---------|
| Sample_SPB30.mb.9               | 44.00 | Clostridiales      | 230339 | 2813418 |
| Sample_SPB30.mb.94cbin.1        | 44.60 | Clostridiales      | 20682  | 2549548 |
| Sample_SPB30.mb.53              | 45.50 | Bacteroidales      | 199485 | 3852797 |
| Sample_SPB30.mb.10cbin.1        | 46.10 | Bacteroidales      | 27535  | 4665134 |
| Sample_SPB31.Cluster13260       | 24.20 | Bacteria           | 18753  | 882658  |
| Sample_SPB31.Cluster3560        | 49.40 | Clostridiales      | 95773  | 1991124 |
| Sample_SPB31.mb.50cbin.1        | 59.70 | Bacteria           | 26562  | 2276016 |
| Sample_SPB31.Cluster2308cbin.1  | 51.70 | Clostridiales      | 10822  | 2022857 |
| Sample_SPB31.mb.21              | 45.20 | Clostridiales      | 153090 | 1767127 |
| Sample_SPB31.Cluster89          | 61.90 | Clostridiales      | 52947  | 1603996 |
| Sample_SPB31.mb.4               | 49.60 | Clostridiales      | 79228  | 2039356 |
| Sample_SPB31.Cluster4714        | 47.10 | Selenomonadales    | 79631  | 2278989 |
| Sample_SPB31.mb.19              | 55.30 | Bacteroidetes      | 30474  | 1726102 |
| Sample_SPB31.mb.46              | 57.10 | Clostridiales      | 37402  | 2376553 |
| Sample_SPB31.mb.72cbin.1        | 53.90 | Clostridia         | 14599  | 1789929 |
| Sample_SPB31.mb.1               | 43.80 | Clostridiales      | 145559 | 1779266 |
| Sample_SPB31.mb.76              | 50.00 | Clostridia         | 61573  | 1875219 |
| Sample_SPB31.Cluster10043cbin.1 | 37.80 | Clostridiales      | 8009   | 2255975 |
| Sample_SPB31.mb.15              | 46.70 | Lachnospiraceae    | 32686  | 2857504 |
| Sample_SPB31.Cluster6381        | 44.50 | Clostridiales      | 161144 | 2353454 |
| Sample_SPB31.Cluster13048       | 32.50 | Lactobacillales    | 92183  | 1908482 |
| Sample_SPB31.Cluster291         | 60.40 | Bifidobacteriaceae | 83818  | 1910520 |
| Sample_SPB31.mb.63              | 57.10 | Clostridiales      | 12479  | 2253661 |
| Sample_SPB31.mb.40              | 41.10 | Clostridiales      | 39427  | 1879251 |
| Sample_SPB31.mb.27cbin.1        | 51.90 | Clostridiales      | 11816  | 1920416 |
| Sample_SPB31.mb.86              | 53.30 | Clostridiales      | 43182  | 1814198 |
| Sample_SPB31.mb.64              | 56.90 | Clostridiales      | 19678  | 2714385 |
| Sample_SPB31.mb.25              | 46.30 | Prevotella         | 41166  | 2591597 |
| Sample_SPB31.Cluster8738        | 40.90 | Lachnospiraceae    | 83316  | 2951172 |
| Sample_SPB31.mb.107cbin.1       | 40.80 | Bacteroidales      | 36294  | 2822587 |
| Sample_SPB31.mb.42              | 43.00 | Clostridiales      | 44758  | 2539019 |
| Sample_SPB31.mb.90              | 44.90 | Bacteroidales      | 13843  | 2208751 |
| Sample_SPB31.mb.85cbin.1        | 44.40 | Clostridiales      | 15020  | 2526712 |
| Sample_SPB31.mb.93              | 45.10 | Clostridiales      | 29693  | 2315762 |
| Sample_SPB31.mb.23              | 27.90 | Clostridiales      | 75047  | 3649376 |
| Sample_SPB31.Cluster5530        | 44.80 | Bacteroidales      | 138604 | 4942754 |
| Sample_SPB31.mb.78              | 43.50 | Bacteroidales      | 288270 | 3096668 |
| Sample_SPB31.mb.41              | 41.80 | Bacteroidales      | 43583  | 4706091 |
| Sample_SPB31.Cluster35cbin.1    | 57.10 | Enterobacteriaceae | 139460 | 5407355 |
| Sample_SPB32.mb.100             | 47.50 | Bacteria           | 62212  | 1608376 |
| Sample_SPB32.Cluster6265cbin.1  | 33.50 | Clostridiales      | 360746 | 2178029 |
| Sample_SPB32.mb.13cbin.1        | 38.30 | Clostridiales      | 83080  | 2009641 |
| Sample_SPB32.mb.11              | 40.80 | Clostridiales      | 68472  | 2522700 |
| Sample_SPB32.Cluster3095cbin.1  | 44.70 | Clostridiales      | 17823  | 2486070 |
| Sample_SPB32.Cluster2891cbin.1  | 45.10 | Lachnospiraceae    | 132331 | 2405715 |
| Sample_SPB32.Cluster4348cbin.1  | 40.40 | Clostridiales      | 235960 | 2121590 |
| Sample_SPB32.Cluster11cbin.1    | 59.10 | Clostridiales      | 34108  | 2483303 |
| Sample_SPB32.Cluster142         | 57.80 | Proteobacteria     | 20218  | 2106450 |
| Sample_SPB32.mb.95cbin.1        | 48.80 | Clostridiales      | 15706  | 2071395 |
| Sample_SPB32.Cluster110         | 60.40 | Bifidobacteriaceae | 147632 | 1905736 |
| Sample_SPB32.mb.18              | 46.80 | Lachnospiraceae    | 64669  | 3357183 |
| Sample_SPB32.Cluster161cbin.1   | 59.70 | Bacteroidetes      | 148051 | 2736345 |
| Sample_SPB32.mb.53cbin.1        | 59.20 | Clostridiales      | 17697  | 2203414 |
| Sample_SPB32.Cluster2789        | 43.90 | Clostridiales      | 58731  | 3266418 |
| Sample_SPB32.Cluster5551cbin.1  | 29.70 | Bacteria           | 56108  | 2525638 |
| Sample_SPB32.mb.47              | 49.60 | Clostridiales      | 26678  | 2775407 |
| Sample_SPB32.Cluster4022cbin.1  | 39.50 | Pasteurellaceae    | 5912   | 1500434 |
| Sample_SPB32.mb.5               | 42.20 | Clostridiales      | 67930  | 2445227 |

|                                |       |                     |        |         |
|--------------------------------|-------|---------------------|--------|---------|
| Sample_SPB32.mb.104cbin.1      | 45.00 | Clostridiales       | 41784  | 2687806 |
| Sample_SPB32.Cluster3715       | 37.10 | Clostridiales       | 140582 | 2786392 |
| Sample_SPB32.mb.39             | 38.30 | Lachnospiraceae     | 23473  | 2771159 |
| Sample_SPB32.mb.93cbin.1       | 54.70 | Bacteroidetes       | 126524 | 1995010 |
| Sample_SPB32.mb.29             | 26.80 | Clostridiales       | 65602  | 2623114 |
| Sample_SPB32.mb.57cbin.1       | 45.00 | Clostridiales       | 72011  | 2613952 |
| Sample_SPB32.mb.70cbin.1       | 38.50 | Clostridiales       | 128296 | 2726907 |
| Sample_SPB32.mb.64             | 42.40 | Lachnospiraceae     | 100719 | 3173847 |
| Sample_SPB32.Cluster3691cbin.1 | 40.20 | Lachnospiraceae     | 21704  | 4417208 |
| Sample_SPB32.Cluster1224cbin.1 | 45.60 | Bacteroidales       | 23680  | 3865028 |
| Sample_SPB32.mb.86cbin.1       | 44.90 | Clostridiales       | 61962  | 3675108 |
| Sample_SPB32.mb.96cbin.1       | 40.10 | Lachnospiraceae     | 127780 | 3606449 |
| Sample_SPB32.Cluster1850cbin.1 | 46.30 | Bacteroidales       | 172786 | 4373665 |
| Sample_SPB32.mb.107cbin.1      | 45.00 | Bacteroidales       | 180303 | 4536245 |
| Sample_SPB32.mb.78cbin.1       | 42.60 | Bacteroidales       | 16564  | 3763253 |
| Sample_SPB34.Cluster8235       | 41.00 | Bacteria            | 94634  | 3060013 |
| Sample_SPB34.Cluster2119cbin.1 | 49.50 | Bacteroidales       | 50447  | 2440203 |
| Sample_SPB34.Cluster219cbin.1  | 58.00 | Clostridiales       | 14945  | 2982913 |
| Sample_SPB34.Cluster8435       | 41.20 | Clostridiales       | 117192 | 1362830 |
| Sample_SPB34.Cluster11cbin.1   | 64.30 | Deltaproteobacteria | 6906   | 1995324 |
| Sample_SPB34.Cluster1214cbin.1 | 54.10 | Prevotella          | 59709  | 2492087 |
| Sample_SPB34.Cluster5423cbin.1 | 44.50 | Clostridiales       | 22077  | 2520221 |
| Sample_SPB34.mb.10             | 54.90 | Bacteroidetes       | 50579  | 1989307 |
| Sample_SPB34.mb.63             | 34.20 | Clostridiales       | 23837  | 2129315 |
| Sample_SPB34.mb.103cbin.1      | 51.20 | Clostridiales       | 75019  | 2026760 |
| Sample_SPB34.Cluster1265cbin.1 | 54.80 | Proteobacteria      | 104679 | 2507124 |
| Sample_SPB34.Cluster6727cbin.1 | 44.00 | Clostridiales       | 360313 | 2872563 |
| Sample_SPB34.mb.43             | 60.10 | Actinobacteria      | 42398  | 1932106 |
| Sample_SPB34.Cluster9258       | 37.70 | Clostridiales       | 9091   | 2157546 |
| Sample_SPB34.Cluster6494cbin.1 | 43.00 | Clostridiales       | 68434  | 2676486 |
| Sample_SPB34.mb.58cbin.1       | 57.90 | Clostridiales       | 43384  | 2212066 |
| Sample_SPB34.Cluster6796cbin.1 | 41.50 | Lachnospiraceae     | 34687  | 2804340 |
| Sample_SPB34.mb.71             | 58.80 | Clostridiales       | 76002  | 2140030 |
| Sample_SPB34.Cluster2430cbin.1 | 46.70 | Lachnospiraceae     | 28913  | 7078483 |
| Sample_SPB34.mb.105            | 72.70 | Actinomycetaceae    | 11513  | 2804838 |
| Sample_SPB34.Cluster11702      | 28.90 | Bacteria            | 82996  | 2653438 |
| Sample_SPB34.mb.107            | 44.90 | Bacteroidales       | 40740  | 2824707 |
| Sample_SPB34.mb.8cbin.1        | 60.00 | Clostridiales       | 6963   | 1903901 |
| Sample_SPB34.mb.90             | 50.80 | Clostridiales       | 37417  | 2124362 |
| Sample_SPB34.Cluster9277cbin.1 | 43.10 | Bacteria            | 74378  | 4091295 |
| Sample_SPB34.mb.96cbin.1       | 48.30 | Bacteroidales       | 48712  | 2456538 |
| Sample_SPB34.mb.52             | 43.30 | Bacteroidales       | 27091  | 2973105 |
| Sample_SPB34.mb.80             | 60.30 | Bacteroidetes       | 25876  | 2645189 |
| Sample_SPB34.mb.60             | 49.70 | Lachnospiraceae     | 53340  | 2948290 |
| Sample_SPB34.mb.6              | 43.10 | Lachnospiraceae     | 17872  | 3147250 |
| Sample_SPB34.mb.2cbin.1        | 45.30 | Bacteroidales       | 12812  | 4022882 |
| Sample_SPB34.mb.78cbin.1       | 43.30 | Lachnospiraceae     | 55315  | 2684295 |
| Sample_SPB34.mb.91             | 42.00 | Lachnospiraceae     | 24808  | 2300955 |
| Sample_SPB34.mb.72cbin.1       | 45.50 | Bacteroidales       | 55463  | 3951236 |
| Sample_SPB35.Cluster13733      | 23.90 | Bacteria            | 43709  | 946009  |
| Sample_SPB35.Cluster13575      | 25.20 | Bacteria            | 95002  | 1307457 |
| Sample_SPB35.Cluster2519       | 49.30 | Bacteria            | 18580  | 1703038 |
| Sample_SPB35.Cluster10159      | 37.60 | Clostridiales       | 112938 | 2191235 |
| Sample_SPB35.mb.29             | 28.10 | Bacteria            | 37057  | 1182743 |
| Sample_SPB35.Cluster9089       | 41.90 | Clostridiales       | 114824 | 2351623 |
| Sample_SPB35.mb.118cbin.1      | 47.30 | Clostridiales       | 272365 | 1570365 |
| Sample_SPB35.mb.24cbin.1       | 53.80 | Clostridia          | 11411  | 1582790 |
| Sample_SPB35.mb.112            | 41.70 | Clostridiales       | 156375 | 1881620 |



|                                 |       |                    |        |         |
|---------------------------------|-------|--------------------|--------|---------|
| Sample_SPB35.Cluster5949cbin.1  | 56.50 | Clostridiales      | 74600  | 2004785 |
| Sample_SPB35.Cluster902cbin.1   | 53.60 | Clostridiales      | 9477   | 1814117 |
| Sample_SPB35.mb.107             | 61.20 | Clostridiales      | 47106  | 1674337 |
| Sample_SPB35.mb.47              | 26.90 | Bacteria           | 42183  | 1287146 |
| Sample_SPB35.Cluster47cbin.1    | 59.80 | Actinobacteria     | 79322  | 2181392 |
| Sample_SPB35.Cluster6306        | 45.80 | Lachnospiraceae    | 63016  | 2613686 |
| Sample_SPB35.Cluster932cbin.1   | 51.80 | Bacteria           | 6470   | 4565701 |
| Sample_SPB35.mb.114cbin.1       | 56.20 | Clostridiales      | 55253  | 2660764 |
| Sample_SPB35.Cluster11811cbin.1 | 27.20 | Clostridiales      | 17829  | 2476429 |
| Sample_SPB35.Cluster134         | 55.60 | Bacteria           | 74936  | 2678948 |
| Sample_SPB35.Cluster2001        | 54.40 | Proteobacteria     | 75521  | 2233374 |
| Sample_SPB35.Cluster9269        | 40.70 | Clostridiales      | 125866 | 1805040 |
| Sample_SPB35.mb.85cbin.1        | 27.40 | Bacteria           | 141095 | 1188476 |
| Sample_SPB35.Cluster495cbin.1   | 59.70 | Bifidobacteriaceae | 279079 | 2230826 |
| Sample_SPB35.mb.106             | 59.10 | Clostridiales      | 10094  | 2169528 |
| Sample_SPB35.mb.17cbin.1        | 58.90 | Clostridiales      | 37036  | 2589666 |
| Sample_SPB35.Cluster9599        | 40.60 | Clostridiales      | 85666  | 2675079 |
| Sample_SPB35.mb.110             | 45.90 | Lachnospiraceae    | 79905  | 2755046 |
| Sample_SPB35.mb.100             | 30.80 | Euryarchaeota      | 140108 | 1815562 |
| Sample_SPB35.mb.54cbin.1        | 43.60 | Clostridiales      | 13960  | 2808326 |
| Sample_SPB35.mb.30              | 37.30 | Clostridiales      | 31286  | 2166113 |
| Sample_SPB35.mb.83              | 52.80 | Clostridiales      | 8949   | 1756496 |
| Sample_SPB35.mb.25cbin.1        | 46.90 | Clostridiales      | 32527  | 2556912 |
| Sample_SPB35.mb.8cbin.1         | 50.90 | Clostridiales      | 84470  | 1688915 |
| Sample_SPB35.mb.76cbin.1        | 37.10 | Clostridiales      | 159452 | 2568252 |
| Sample_SPB35.mb.45cbin.1        | 56.70 | Clostridiales      | 63063  | 2370136 |
| Sample_SPB35.mb.95              | 59.90 | Clostridiales      | 103977 | 2043046 |
| Sample_SPB35.mb.57cbin.1        | 46.90 | Clostridiales      | 27065  | 1493162 |
| Sample_SPB35.mb.49cbin.1        | 43.70 | Clostridiales      | 22612  | 1867124 |
| Sample_SPB35.mb.67cbin.1        | 36.90 | Clostridiales      | 102182 | 2192054 |
| Sample_SPB35.mb.41cbin.1        | 40.80 | Clostridiales      | 20126  | 2868540 |
| Sample_SPB35.mb.82cbin.1        | 51.60 | Clostridiales      | 22774  | 2081427 |
| Sample_SPB35.mb.66cbin.1        | 56.80 | Bacteria           | 13046  | 2912267 |
| Sample_SPB35.Cluster428         | 57.50 | Enterobacteriaceae | 243039 | 5169987 |
| Sample_SPB36.Cluster48cbin.1    | 60.30 | Clostridiales      | 7591   | 1943804 |
| Sample_SPB36.mb.102             | 56.20 | Clostridiales      | 13796  | 1672391 |
| Sample_SPB36.mb.51              | 27.20 | Bacteria           | 77015  | 1348553 |
| Sample_SPB36.mb.39              | 53.10 | Clostridiales      | 12055  | 1754196 |
| Sample_SPB36.mb.4               | 32.80 | Bacteria           | 152039 | 1924560 |
| Sample_SPB36.mb.57cbin.1        | 58.00 | Clostridiales      | 33289  | 3089274 |
| Sample_SPB36.mb.74cbin.1        | 52.90 | Clostridia         | 68276  | 2090455 |
| Sample_SPB36.Cluster4543cbin.1  | 52.50 | Firmicutes         | 15662  | 2034365 |
| Sample_SPB36.Cluster3595        | 54.70 | Bacteroidetes      | 146976 | 2013005 |
| Sample_SPB36.Cluster4053cbin.1  | 53.60 | Clostridiales      | 167505 | 2073051 |
| Sample_SPB36.mb.50              | 56.60 | Clostridiales      | 69492  | 2164468 |
| Sample_SPB36.Cluster3243cbin.1  | 55.60 | Bacteria           | 119712 | 2581998 |
| Sample_SPB36.Cluster136cbin.1   | 58.90 | Clostridiales      | 76856  | 2863458 |
| Sample_SPB36.mb.58              | 56.60 | Clostridiales      | 24954  | 2152355 |
| Sample_SPB36.mb.15              | 51.20 | Clostridiales      | 184046 | 2227956 |
| Sample_SPB36.Cluster977         | 60.40 | Bifidobacteriaceae | 100913 | 1907705 |
| Sample_SPB36.mb.76              | 61.60 | Clostridiales      | 26584  | 1781267 |
| Sample_SPB36.mb.23cbin.1        | 59.50 | Bacteroidetes      | 88577  | 2781143 |
| Sample_SPB36.mb.85              | 56.40 | Clostridiales      | 38475  | 2749430 |
| Sample_SPB36.mb.37              | 37.40 | Clostridiales      | 37706  | 2736387 |
| Sample_SPB36.mb.38              | 41.30 | Lachnospiraceae    | 105786 | 2741189 |
| Sample_SPB36.mb.67              | 44.90 | Lachnospiraceae    | 21722  | 2085131 |
| Sample_SPB36.mb.9cbin.1         | 39.40 | Clostridiales      | 95811  | 2111525 |
| Sample_SPB36.mb.106             | 46.50 | Bacteroidales      | 154229 | 3797459 |

|                                 |       |                     |        |         |
|---------------------------------|-------|---------------------|--------|---------|
| Sample_SPB36.mb.5               | 41.80 | Bacteroides         | 80895  | 4603485 |
| Sample_SPB36.mb.63cbin.1        | 42.00 | Bacteroidales       | 47999  | 4737344 |
| Sample_SPB36.Cluster9234cbin.1  | 50.70 | Enterobacteriaceae  | 113134 | 4629981 |
| Sample_SPB37.Cluster5612cbin.1  | 46.00 | Bacteria            | 80127  | 3757856 |
| Sample_SPB37.mb.131             | 59.90 | Bacteria            | 93298  | 2433666 |
| Sample_SPB37.Cluster444cbin.1   | 60.30 | Clostridiales       | 123932 | 2006858 |
| Sample_SPB37.mb.18              | 47.10 | Clostridiales       | 94158  | 2047830 |
| Sample_SPB37.mb.10              | 62.80 | Clostridiales       | 40944  | 1748201 |
| Sample_SPB37.mb.109             | 61.20 | Clostridiales       | 130432 | 1760549 |
| Sample_SPB37.Cluster11531       | 33.40 | Bacteria            | 40406  | 2333487 |
| Sample_SPB37.Cluster219cbin.1   | 60.00 | Actinobacteria      | 57493  | 2118160 |
| Sample_SPB37.mb.107             | 61.00 | Clostridiales       | 66361  | 2150089 |
| Sample_SPB37.Cluster3269cbin.1  | 54.30 | Bacteroidetes       | 73355  | 2149431 |
| Sample_SPB37.Cluster10324       | 41.00 | Clostridiales       | 189904 | 2089778 |
| Sample_SPB37.mb.103cbin.1       | 58.70 | Clostridiales       | 20435  | 2372947 |
| Sample_SPB37.mb.32              | 58.50 | Clostridiales       | 14206  | 2774055 |
| Sample_SPB37.Cluster4525        | 51.40 | Clostridiales       | 199321 | 2224342 |
| Sample_SPB37.Cluster285cbin.1   | 60.50 | Bifidobacteriaceae  | 60391  | 1720147 |
| Sample_SPB37.Cluster57cbin.1    | 63.70 | Deltaproteobacteria | 29674  | 2561835 |
| Sample_SPB37.Cluster7811        | 44.00 | Clostridiales       | 227078 | 1873571 |
| Sample_SPB37.mb.141cbin.1       | 46.90 | Lactobacillales     | 77833  | 1975951 |
| Sample_SPB37.mb.142             | 44.90 | Clostridiales       | 17479  | 2496613 |
| Sample_SPB37.Cluster1449cbin.1  | 56.60 | Bifidobacteriaceae  | 48999  | 2034897 |
| Sample_SPB37.Cluster11556cbin.1 | 38.60 | Streptococcus       | 121419 | 1858490 |
| Sample_SPB37.Cluster399cbin.1   | 59.90 | Bifidobacteriaceae  | 45457  | 2489144 |
| Sample_SPB37.mb.127             | 56.40 | Clostridiales       | 11950  | 2271524 |
| Sample_SPB37.mb.105             | 44.80 | Clostridiales       | 43893  | 2376003 |
| Sample_SPB37.mb.112cbin.1       | 32.60 | Lactobacillales     | 88341  | 1910217 |
| Sample_SPB37.mb.29cbin.1        | 44.60 | Clostridiales       | 71914  | 2790245 |
| Sample_SPB37.mb.102             | 42.30 | Lachnospiraceae     | 13858  | 2099578 |
| Sample_SPB37.mb.30cbin.1        | 59.60 | Bifidobacteriaceae  | 71924  | 1940881 |
| Sample_SPB37.mb.17cbin.1        | 59.70 | Bacteroidetes       | 25766  | 3165435 |
| Sample_SPB37.mb.63              | 58.50 | Clostridiales       | 69383  | 1960806 |
| Sample_SPB37.mb.44cbin.1        | 54.10 | Clostridiales       | 16266  | 2140681 |
| Sample_SPB37.mb.13cbin.1        | 59.20 | Bacteroidetes       | 207044 | 2742316 |
| Sample_SPB37.mb.76cbin.1        | 48.20 | Clostridiales       | 27098  | 2745665 |
| Sample_SPB37.mb.40cbin.1        | 42.30 | Lachnospiraceae     | 12057  | 2245215 |
| Sample_SPB37.Cluster6256cbin.1  | 48.80 | Clostridiales       | 59517  | 6920853 |
| Sample_SPB37.mb.82cbin.1        | 57.50 | Bacteria            | 52670  | 2404083 |
| Sample_SPB37.mb.73cbin.1        | 60.70 | Clostridiales       | 23887  | 2238384 |
| Sample_SPB37.mb.39              | 59.60 | Proteobacteria      | 29631  | 2848414 |
| Sample_SPB37.mb.52              | 59.10 | Bacteroidetes       | 161201 | 2586190 |
| Sample_SPB37.mb.90cbin.1        | 53.00 | Clostridia          | 101678 | 2846438 |
| Sample_SPB37.mb.8cbin.1         | 49.10 | Bacteroidales       | 189833 | 3095314 |
| Sample_SPB37.mb.69cbin.1        | 39.80 | Streptococcus       | 24914  | 2081881 |
| Sample_SPB37.mb.75cbin.1        | 46.10 | Clostridiales       | 12586  | 2569984 |
| Sample_SPB37.Cluster6931cbin.1  | 45.10 | Bacteroidales       | 62780  | 4666635 |
| Sample_SPB37.mb.62cbin.1        | 54.10 | Selenomonadales     | 28405  | 2012570 |
| Sample_SPB37.mb.42              | 42.00 | Bacteroidales       | 52586  | 4317141 |
| Sample_SPB37.mb.4cbin.1         | 45.30 | Bacteroidales       | 150216 | 4160518 |
| Sample_SPB38.Cluster33cbin.1    | 60.50 | Clostridiales       | 18244  | 1939575 |
| Sample_SPB38.mb.29cbin.1        | 61.40 | Clostridiales       | 14348  | 1882038 |
| Sample_SPB38.Cluster9738cbin.1  | 34.20 | Bacteria            | 29420  | 2028578 |
| Sample_SPB38.Cluster404         | 60.10 | Actinobacteria      | 96568  | 2128226 |
| Sample_SPB38.mb.32cbin.1        | 44.80 | Clostridiales       | 13194  | 2389434 |
| Sample_SPB38.mb.4               | 48.40 | Clostridiales       | 18485  | 2813653 |
| Sample_SPB38.Cluster1235cbin.1  | 54.60 | Prevotella          | 50636  | 2428880 |
| Sample_SPB38.Cluster8110        | 40.60 | Clostridiales       | 249606 | 2091477 |

|                                 |       |                     |        |         |
|---------------------------------|-------|---------------------|--------|---------|
| Sample_SPB38.Cluster6151cbin.1  | 43.30 | Lachnospiraceae     | 13406  | 2115051 |
| Sample_SPB38.Cluster2495        | 54.60 | Bacteroidetes       | 222506 | 2894612 |
| Sample_SPB38.mb.5               | 40.50 | Clostridiales       | 16955  | 2702786 |
| Sample_SPB38.mb.26cbin.1        | 37.80 | Clostridiales       | 218967 | 2032240 |
| Sample_SPB38.mb.38cbin.1        | 63.60 | Actinobacteria      | 10751  | 2418833 |
| Sample_SPB38.Cluster51cbin.1    | 60.40 | Deltaproteobacteria | 8820   | 3511101 |
| Sample_SPB38.mb.78              | 59.50 | Clostridiales       | 9493   | 1761309 |
| Sample_SPB38.Cluster7246cbin.1  | 41.20 | Lachnospiraceae     | 111391 | 2956083 |
| Sample_SPB38.mb.81              | 54.10 | Actinobacteria      | 176088 | 1647837 |
| Sample_SPB38.mb.67cbin.1        | 55.40 | Bacteroidetes       | 30280  | 1818042 |
| Sample_SPB38.Cluster5633        | 42.60 | Bacteroidales       | 62414  | 2792758 |
| Sample_SPB38.mb.60              | 53.10 | Clostridiales       | 69091  | 2261711 |
| Sample_SPB38.mb.83              | 51.60 | Clostridiales       | 25410  | 2070906 |
| Sample_SPB38.Cluster6964        | 43.30 | Bacteroidales       | 245369 | 3276599 |
| Sample_SPB38.mb.10cbin.1        | 46.50 | Bacteroidales       | 146122 | 4121618 |
| Sample_SPB38.mb.41cbin.1        | 41.70 | Lachnospiraceae     | 81435  | 2630749 |
| Sample_SPB38.mb.7               | 37.40 | Clostridiales       | 124815 | 2793037 |
| Sample_SPB38.mb.75              | 59.50 | Bacteroidetes       | 79983  | 2814223 |
| Sample_SPB38.mb.33cbin.1        | 43.80 | Bacteroidales       | 14578  | 3438135 |
| Sample_SPB38.mb.51              | 41.70 | Clostridiales       | 38728  | 3396874 |
| Sample_SPB38.mb.34              | 45.30 | Bacteroidales       | 20324  | 4098357 |
| Sample_SPB38.mb.93cbin.1        | 60.10 | Bifidobacteriaceae  | 34573  | 2213893 |
| Sample_SPB38.mb.92cbin.1        | 39.80 | Streptococcus       | 17713  | 2068442 |
| Sample_SPB38.mb.79              | 41.90 | Bacteroidales       | 39198  | 4319199 |
| Sample_SPB38.mb.91cbin.1        | 45.20 | Bacteroidales       | 83255  | 4168968 |
| Sample_SPB39.Cluster13847cbin.1 | 26.00 | Bacteria            | 92187  | 1331914 |
| Sample_SPB39.mb.20cbin.1        | 23.90 | Bacteria            | 64411  | 819420  |
| Sample_SPB39.Cluster7601        | 45.20 | Clostridiales       | 165676 | 1720333 |
| Sample_SPB39.mb.27              | 49.30 | Clostridiales       | 18747  | 1882641 |
| Sample_SPB39.Cluster12504       | 33.30 | Bacteria            | 10668  | 1846440 |
| Sample_SPB39.mb.15cbin.1        | 32.10 | Clostridiales       | 24098  | 2672006 |
| Sample_SPB39.mb.102             | 52.40 | Bacteroidales       | 31225  | 2058737 |
| Sample_SPB39.mb.64              | 59.30 | Clostridiales       | 13497  | 1611216 |
| Sample_SPB39.Cluster2146cbin.1  | 52.30 | Clostridiales       | 20556  | 2026076 |
| Sample_SPB39.mb.73              | 34.10 | Clostridiales       | 117641 | 2517359 |
| Sample_SPB39.Cluster119         | 62.70 | Proteobacteria      | 68872  | 2252876 |
| Sample_SPB39.mb.72              | 57.40 | Clostridiales       | 11877  | 2103151 |
| Sample_SPB39.Cluster8360        | 43.60 | Clostridiales       | 356916 | 2949742 |
| Sample_SPB39.Cluster2005cbin.1  | 53.70 | Bacteroidales       | 98343  | 2580093 |
| Sample_SPB39.Cluster7507cbin.1  | 44.20 | Clostridiales       | 181731 | 2746865 |
| Sample_SPB39.Cluster7097cbin.1  | 44.60 | Prevotella          | 15968  | 3439677 |
| Sample_SPB39.mb.50              | 53.60 | Clostridiales       | 152452 | 1844484 |
| Sample_SPB39.mb.19              | 43.80 | Clostridiales       | 8007   | 2705292 |
| Sample_SPB39.mb.100             | 60.20 | Bacteroidetes       | 8294   | 2386873 |
| Sample_SPB39.mb.69              | 59.90 | Actinobacteria      | 21235  | 2060630 |
| Sample_SPB39.Cluster5922cbin.1  | 49.40 | Lachnospiraceae     | 65673  | 2907165 |
| Sample_SPB39.mb.65              | 54.50 | Bacteroidetes       | 75835  | 2252352 |
| Sample_SPB39.mb.75cbin.1        | 61.00 | Clostridiales       | 10910  | 2214903 |
| Sample_SPB39.mb.71cbin.1        | 38.30 | Clostridiales       | 58335  | 2373918 |
| Sample_SPB39.mb.70              | 59.70 | Bacteroidetes       | 36108  | 2722590 |
| Sample_SPB39.mb.94cbin.1        | 48.60 | Clostridiales       | 23030  | 2650725 |
| Sample_SPB39.Cluster5967cbin.1  | 43.10 | Bacteria            | 13312  | 3826393 |
| Sample_SPB39.Cluster3079cbin.1  | 46.10 | Bacteroidales       | 7533   | 3450681 |
| Sample_SPB39.mb.4cbin.1         | 40.90 | Lachnospiraceae     | 69274  | 3060781 |
| Sample_SPB39.mb.18cbin.1        | 41.70 | Bacteroidales       | 52537  | 4003897 |
| Sample_SPB39.mb.9cbin.1         | 48.80 | Firmicutes          | 35186  | 1802402 |
| Sample_SPB39.mb.6               | 43.60 | Bacteroidales       | 65186  | 3046295 |
| Sample_SPB39.mb.87              | 43.90 | Lachnospiraceae     | 109858 | 2689569 |

|                                 |       |                    |        |         |
|---------------------------------|-------|--------------------|--------|---------|
| Sample_SPB39.Cluster9689cbin.1  | 45.00 | Bacteroidales      | 10007  | 4078457 |
| Sample_SPB39.mb.104cbin.1       | 41.70 | Bacteroidales      | 28090  | 4405857 |
| Sample_SPB39.mb.97              | 37.50 | Clostridiales      | 125427 | 2705815 |
| Sample_SPB39.mb.78              | 48.10 | Bacteroidales      | 107360 | 3429009 |
| Sample_SPB41.Cluster6743        | 47.30 | Clostridiales      | 365671 | 1535203 |
| Sample_SPB41.Cluster10038cbin.1 | 37.60 | Clostridiales      | 168980 | 2164182 |
| Sample_SPB41.mb.20              | 53.80 | Clostridia         | 69753  | 1671058 |
| Sample_SPB41.Cluster1256        | 57.20 | Clostridiales      | 66115  | 1841805 |
| Sample_SPB41.Cluster220cbin.1   | 57.10 | Clostridiales      | 16441  | 2283769 |
| Sample_SPB41.Cluster3956cbin.1  | 51.30 | Bacteroidetes      | 52452  | 3163039 |
| Sample_SPB41.mb.16              | 58.40 | Clostridiales      | 6379   | 2235593 |
| Sample_SPB41.mb.100cbin.1       | 60.60 | Clostridiales      | 26188  | 1719535 |
| Sample_SPB41.mb.12              | 59.70 | Clostridiales      | 73593  | 2385753 |
| Sample_SPB41.Cluster11656       | 31.70 | Euryarchaeota      | 45236  | 1579723 |
| Sample_SPB41.Cluster6965        | 46.70 | Lactobacillales    | 191845 | 2016415 |
| Sample_SPB41.mb.71              | 26.00 | Bacteria           | 107170 | 1419736 |
| Sample_SPB41.Cluster6251        | 46.70 | Selenomonadales    | 115041 | 2341215 |
| Sample_SPB41.Cluster1709cbin.1  | 56.80 | Bacteroidetes      | 179817 | 2632435 |
| Sample_SPB41.Cluster1542        | 55.30 | Bacteria           | 218542 | 2729258 |
| Sample_SPB41.mb.55              | 58.70 | Clostridiales      | 6091   | 1584113 |
| Sample_SPB41.mb.63              | 58.50 | Clostridiales      | 35635  | 2849744 |
| Sample_SPB41.Cluster500cbin.1   | 59.00 | Bacteroidetes      | 71356  | 3052892 |
| Sample_SPB41.mb.81              | 49.60 | Clostridiales      | 65403  | 1964142 |
| Sample_SPB41.Cluster706         | 60.50 | Bifidobacteriaceae | 154960 | 1985822 |
| Sample_SPB41.mb.27              | 34.70 | Lactobacillus      | 12022  | 1684376 |
| Sample_SPB41.mb.19              | 36.40 | Clostridiales      | 9265   | 1884235 |
| Sample_SPB41.mb.84              | 36.30 | Clostridiales      | 78821  | 1750468 |
| Sample_SPB41.mb.30cbin.1        | 51.50 | Clostridiales      | 93676  | 1981272 |
| Sample_SPB41.Cluster335cbin.1   | 59.30 | Clostridiales      | 112868 | 3603115 |
| Sample_SPB41.mb.54              | 60.20 | Actinobacteria     | 38635  | 1940010 |
| Sample_SPB41.mb.65cbin.1        | 56.80 | Clostridiales      | 68988  | 1992896 |
| Sample_SPB41.mb.25              | 44.10 | Clostridiales      | 57635  | 2726652 |
| Sample_SPB41.mb.62cbin.1        | 54.40 | Bacteroidetes      | 58109  | 2281337 |
| Sample_SPB41.Cluster6618cbin.1  | 43.10 | Bacteria           | 30292  | 4160105 |
| Sample_SPB41.mb.7               | 38.50 | Streptococcus      | 120564 | 1811158 |
| Sample_SPB41.mb.88cbin.1        | 32.50 | Lactobacillales    | 28208  | 1795125 |
| Sample_SPB41.mb.67cbin.1        | 36.90 | Lactobacillales    | 29315  | 1977597 |
| Sample_SPB41.Cluster7206        | 43.10 | Bacteroidales      | 157614 | 4906192 |
| Sample_SPB41.mb.51cbin.1        | 42.30 | Bacteroidales      | 38311  | 4406111 |
| Sample_SPB41.mb.96              | 42.10 | Bacteria           | 79173  | 4446675 |
| Sample_SPB41.Cluster756cbin.1   | 50.70 | Enterobacteriaceae | 32849  | 4724289 |
| Sample_SPB42.Cluster18534       | 25.20 | Bacteria           | 116143 | 1220648 |
| Sample_SPB42.Cluster10349       | 45.40 | Clostridia         | 111763 | 1689266 |
| Sample_SPB42.mb.127             | 26.00 | Bacteria           | 45716  | 1167654 |
| Sample_SPB42.mb.104cbin.1       | 49.40 | Clostridiales      | 112983 | 1936513 |
| Sample_SPB42.mb.11cbin.1        | 53.30 | Clostridia         | 15923  | 1833508 |
| Sample_SPB42.mb.106             | 58.70 | Clostridiales      | 7276   | 2465874 |
| Sample_SPB42.Cluster10307       | 46.10 | Clostridiales      | 96973  | 2133988 |
| Sample_SPB42.Cluster17197cbin.1 | 34.50 | Clostridiales      | 60858  | 4341667 |
| Sample_SPB42.Cluster188cbin.1   | 59.90 | Bacteria           | 55799  | 5126616 |
| Sample_SPB42.Cluster89          | 61.60 | Clostridiales      | 26834  | 1658490 |
| Sample_SPB42.Cluster656cbin.1   | 58.50 | Clostridiales      | 16520  | 2149491 |
| Sample_SPB42.Cluster15277cbin.1 | 38.50 | Clostridiales      | 70702  | 1571223 |
| Sample_SPB42.Cluster65cbin.1    | 59.40 | Clostridiales      | 16997  | 2163119 |
| Sample_SPB42.mb.10              | 57.00 | Clostridiales      | 21240  | 2263970 |
| Sample_SPB42.mb.32cbin.1        | 53.70 | Clostridia         | 23105  | 1734054 |
| Sample_SPB42.Cluster10714       | 44.50 | Clostridiales      | 136121 | 2171517 |
| Sample_SPB42.Cluster582         | 60.40 | Bifidobacteriaceae | 136599 | 1921494 |

|                                 |       |                    |        |         |
|---------------------------------|-------|--------------------|--------|---------|
| Sample_SPB42.mb.53              | 52.90 | Clostridiales      | 15439  | 1917874 |
| Sample_SPB42.Cluster15132cbin.1 | 41.40 | Lachnospiraceae    | 55558  | 2855116 |
| Sample_SPB42.mb.140             | 61.90 | Clostridiales      | 34196  | 2365617 |
| Sample_SPB42.Cluster877         | 55.50 | Bacteria           | 98804  | 2717471 |
| Sample_SPB42.mb.20              | 61.50 | Clostridiales      | 21457  | 2143765 |
| Sample_SPB42.Cluster75cbin.1    | 62.70 | Proteobacteria     | 25152  | 2320996 |
| Sample_SPB42.mb.41              | 61.90 | Clostridiales      | 20091  | 1959467 |
| Sample_SPB42.mb.15              | 54.80 | Bacteroidetes      | 153234 | 2093116 |
| Sample_SPB42.Cluster8875cbin.1  | 46.80 | Lactobacillus      | 33237  | 2769590 |
| Sample_SPB42.mb.72cbin.1        | 51.90 | Clostridiales      | 10553  | 2063904 |
| Sample_SPB42.mb.129             | 57.90 | Bacteroidetes      | 144590 | 3428726 |
| Sample_SPB42.mb.116             | 43.30 | Bacteroidales      | 259733 | 3219778 |
| Sample_SPB42.mb.69cbin.1        | 63.80 | Actinobacteria     | 9640   | 2375349 |
| Sample_SPB42.mb.94cbin.1        | 45.20 | Clostridiales      | 12396  | 2047761 |
| Sample_SPB42.mb.95cbin.1        | 51.10 | Clostridiales      | 74216  | 2200982 |
| Sample_SPB42.mb.75cbin.1        | 37.60 | Clostridiales      | 19317  | 2513464 |
| Sample_SPB42.mb.91cbin.1        | 41.60 | Lachnospiraceae    | 37646  | 3172347 |
| Sample_SPB42.Cluster2849cbin.1  | 56.10 | Enterobacteriaceae | 351103 | 4647577 |
| Sample_SPB42.mb.19cbin.1        | 56.60 | Enterobacteriaceae | 24029  | 5117098 |
| Sample_SPB45.Cluster12822       | 24.10 | Bacteria           | 78572  | 969526  |
| Sample_SPB45.Cluster12958cbin.1 | 26.40 | Bacteria           | 145561 | 1169645 |
| Sample_SPB45.Cluster12862       | 26.70 | Bacteria           | 89262  | 1122934 |
| Sample_SPB45.Cluster1279cbin.1  | 53.80 | Clostridia         | 8901   | 1504019 |
| Sample_SPB45.Cluster3400cbin.1  | 52.90 | Clostridia         | 60519  | 2090399 |
| Sample_SPB45.mb.22cbin.1        | 49.10 | Clostridia         | 55163  | 1393962 |
| Sample_SPB45.Cluster2056        | 54.90 | Clostridiales      | 201270 | 2582299 |
| Sample_SPB45.mb.26cbin.1        | 49.40 | Clostridiales      | 86027  | 1986190 |
| Sample_SPB45.mb.16              | 58.20 | Clostridiales      | 56720  | 2972023 |
| Sample_SPB45.mb.45              | 60.10 | Clostridia         | 5695   | 2420508 |
| Sample_SPB45.Cluster10521cbin.1 | 37.40 | Clostridiales      | 16196  | 2171405 |
| Sample_SPB45.mb.11              | 57.40 | Clostridiales      | 27279  | 1862080 |
| Sample_SPB45.mb.19              | 38.30 | Clostridiales      | 16474  | 3016025 |
| Sample_SPB45.Cluster4014cbin.1  | 51.30 | Bacteroidetes      | 75612  | 3583945 |
| Sample_SPB45.mb.39cbin.1        | 54.90 | Clostridiales      | 15999  | 2461925 |
| Sample_SPB45.Cluster7580cbin.1  | 44.90 | Clostridiales      | 78778  | 2564344 |
| Sample_SPB45.Cluster6181        | 45.60 | Clostridiales      | 63073  | 2012883 |
| Sample_SPB45.mb.107cbin.1       | 57.10 | Clostridiales      | 94639  | 1938807 |
| Sample_SPB45.mb.62              | 25.90 | Bacteria           | 40610  | 1234120 |
| Sample_SPB45.Cluster5347cbin.1  | 47.20 | Selenomonadales    | 8229   | 2053094 |
| Sample_SPB45.mb.48cbin.1        | 60.70 | Clostridiales      | 52834  | 1745334 |
| Sample_SPB45.mb.25              | 61.20 | Clostridiales      | 40971  | 2198357 |
| Sample_SPB45.Cluster3720cbin.1  | 53.20 | Clostridiales      | 192701 | 2092538 |
| Sample_SPB45.mb.104cbin.1       | 59.60 | Clostridiales      | 6865   | 2185341 |
| Sample_SPB45.Cluster12776       | 31.10 | Euryarchaeota      | 185799 | 1778236 |
| Sample_SPB45.mb.5               | 58.80 | Clostridiales      | 11160  | 2049936 |
| Sample_SPB45.Cluster2337        | 55.60 | Bacteria           | 152668 | 2764446 |
| Sample_SPB45.Cluster508         | 60.40 | Bifidobacteriaceae | 96352  | 1907902 |
| Sample_SPB45.Cluster6995cbin.1  | 45.70 | Clostridiales      | 49733  | 2606151 |
| Sample_SPB45.mb.20cbin.1        | 40.60 | Clostridiales      | 121126 | 2066425 |
| Sample_SPB45.mb.76cbin.1        | 53.10 | Clostridiales      | 190010 | 2194883 |
| Sample_SPB45.Cluster25cbin.1    | 61.70 | Clostridiales      | 23839  | 3223573 |
| Sample_SPB45.mb.93              | 58.70 | Clostridia         | 78218  | 2785959 |
| Sample_SPB45.mb.80cbin.1        | 58.30 | Clostridiales      | 38829  | 1837146 |
| Sample_SPB45.mb.75cbin.1        | 55.10 | Clostridiales      | 41648  | 3157530 |
| Sample_SPB45.mb.60              | 53.80 | Clostridiales      | 117227 | 1791664 |
| Sample_SPB45.mb.98              | 59.40 | Clostridiales      | 97113  | 2333759 |
| Sample_SPB45.mb.81              | 40.20 | Clostridiales      | 27401  | 2785048 |
| Sample_SPB45.mb.82              | 59.60 | Actinobacteria     | 69436  | 2226411 |

|                                 |       |                     |        |         |
|---------------------------------|-------|---------------------|--------|---------|
| Sample_SPB45.mb.78              | 44.30 | Clostridiales       | 120317 | 1996538 |
| Sample_SPB45.mb.54              | 43.40 | Bacteroidales       | 26735  | 2958099 |
| Sample_SPB45.Cluster6357        | 45.20 | Bacteroidales       | 76487  | 4306653 |
| Sample_SPB45.mb.95cbin.1        | 56.40 | Clostridiales       | 8923   | 2422570 |
| Sample_SPB45.mb.55cbin.1        | 47.10 | Bacteroidales       | 45897  | 3480621 |
| Sample_SPB45.mb.41cbin.1        | 44.80 | Bacteroidales       | 22148  | 4632603 |
| Sample_SPB45.mb.49              | 49.70 | Clostridiales       | 31074  | 5616546 |
| Sample_SPB45.mb.87cbin.1        | 43.20 | Bacteroidales       | 156681 | 5017111 |
| Sample_SPB47.Cluster12751cbin.1 | 26.20 | Bacteria            | 26739  | 1136895 |
| Sample_SPB47.Cluster3739        | 50.00 | Bacteria            | 348485 | 1479977 |
| Sample_SPB47.Cluster2178cbin.1  | 47.60 | Bacteria            | 74199  | 1787689 |
| Sample_SPB47.Cluster12          | 61.20 | Clostridiales       | 8645   | 1531444 |
| Sample_SPB47.Cluster22cbin.1    | 59.60 | Clostridiales       | 6796   | 1939463 |
| Sample_SPB47.Cluster1652cbin.1  | 50.60 | Clostridiales       | 24095  | 2414434 |
| Sample_SPB47.Cluster1233cbin.1  | 53.20 | Clostridiales       | 46922  | 2338461 |
| Sample_SPB47.Cluster2232cbin.1  | 51.90 | Clostridiales       | 45533  | 1982762 |
| Sample_SPB47.Cluster2856        | 50.10 | Clostridiales       | 111640 | 2306562 |
| Sample_SPB47.mb.36              | 26.60 | Bacteria            | 74609  | 1305736 |
| Sample_SPB47.Cluster48cbin.1    | 60.60 | Clostridiales       | 131440 | 2573394 |
| Sample_SPB47.Cluster1049cbin.1  | 54.90 | Bacteroidetes       | 109540 | 1913335 |
| Sample_SPB47.Cluster1765        | 53.40 | Clostridiales       | 330177 | 1814096 |
| Sample_SPB47.Cluster366cbin.1   | 56.10 | Clostridiales       | 14399  | 2296704 |
| Sample_SPB47.Cluster5597        | 45.70 | Selenomonadales     | 115418 | 1881540 |
| Sample_SPB47.Cluster29cbin.1    | 63.70 | Deltaproteobacteria | 25439  | 2471151 |
| Sample_SPB47.mb.11              | 57.60 | Clostridiales       | 47874  | 2262299 |
| Sample_SPB47.Cluster1190cbin.1  | 56.60 | Bifidobacteriaceae  | 155428 | 2120032 |
| Sample_SPB47.Cluster1024        | 55.30 | Proteobacteria      | 223388 | 2401843 |
| Sample_SPB47.mb.112             | 58.30 | Clostridiales       | 31498  | 2615933 |
| Sample_SPB47.mb.25cbin.1        | 48.90 | Clostridiales       | 17361  | 2540043 |
| Sample_SPB47.Cluster12280cbin.1 | 31.70 | Firmicutes          | 60672  | 1822274 |
| Sample_SPB47.Cluster8455cbin.1  | 40.80 | Clostridiales       | 177049 | 2168943 |
| Sample_SPB47.Cluster7105cbin.1  | 44.10 | Clostridiales       | 157876 | 2780749 |
| Sample_SPB47.Cluster10640cbin.1 | 38.40 | Bacteroidales       | 24129  | 3179829 |
| Sample_SPB47.mb.44              | 61.60 | Clostridiales       | 13025  | 2146420 |
| Sample_SPB47.Cluster10470       | 38.00 | Lactobacillales     | 51570  | 2760674 |
| Sample_SPB47.Cluster8504        | 41.20 | Lachnospiraceae     | 108027 | 2891302 |
| Sample_SPB47.mb.86              | 52.90 | Clostridia          | 85009  | 2057066 |
| Sample_SPB47.mb.122             | 28.70 | Clostridiales       | 23886  | 2506397 |
| Sample_SPB47.mb.14              | 61.10 | Proteobacteria      | 82520  | 2471398 |
| Sample_SPB47.mb.43cbin.1        | 49.70 | Bacteroidales       | 9650   | 2583529 |
| Sample_SPB47.mb.41              | 60.20 | Clostridiales       | 43135  | 2251169 |
| Sample_SPB47.mb.30cbin.1        | 58.90 | Bifidobacteriaceae  | 11426  | 2031612 |
| Sample_SPB47.mb.37              | 60.10 | Bacteroidetes       | 21236  | 2583960 |
| Sample_SPB47.mb.125             | 42.10 | Lachnospiraceae     | 12982  | 2131714 |
| Sample_SPB47.mb.99              | 33.50 | Clostridiales       | 29938  | 2028726 |
| Sample_SPB47.mb.57              | 59.50 | Clostridiales       | 44201  | 1969757 |
| Sample_SPB47.Cluster7084cbin.1  | 43.20 | Bacteria            | 103672 | 4170608 |
| Sample_SPB47.Cluster4651        | 45.10 | Bacteroidales       | 91996  | 4350109 |
| Sample_SPB47.mb.79cbin.1        | 49.30 | Clostridiales       | 11896  | 2545551 |
| Sample_SPB47.mb.27              | 40.80 | Bacteroidales       | 33167  | 3282283 |
| Sample_SPB47.mb.26cbin.1        | 42.10 | Bacteroidales       | 62111  | 3691531 |
| Sample_SPB47.mb.49              | 48.70 | Bacteroidales       | 7334   | 2814180 |
| Sample_SPB47.mb.88cbin.1        | 53.70 | Clostridiales       | 14305  | 2115801 |
| Sample_SPB47.mb.93              | 59.90 | Bacteroidetes       | 151284 | 2802001 |
| Sample_SPB47.mb.97cbin.1        | 58.90 | Bacteroidetes       | 103286 | 2900241 |
| Sample_SPB47.mb.98              | 43.30 | Bacteroidales       | 93077  | 3011351 |
| Sample_SPB47.mb.84cbin.1        | 42.90 | Bacteria            | 45813  | 4610245 |
| Sample_SPB47.mb.61cbin.1        | 44.90 | Bacteroidales       | 29635  | 4785957 |

|                                 |       |                    |        |         |
|---------------------------------|-------|--------------------|--------|---------|
| Sample_SPC03.Cluster14085       | 25.90 | Bacteria           | 136763 | 1275095 |
| Sample_SPC03.Cluster3141cbin.1  | 50.00 | Bacteria           | 60165  | 2136569 |
| Sample_SPC03.Cluster11152       | 37.80 | Clostridiales      | 170203 | 2231976 |
| Sample_SPC03.mb.117             | 52.80 | Clostridia         | 62085  | 1939381 |
| Sample_SPC03.Cluster257         | 61.20 | Clostridiales      | 27353  | 1517029 |
| Sample_SPC03.Cluster9900        | 41.80 | Clostridiales      | 197354 | 2302333 |
| Sample_SPC03.Cluster260cbin.1   | 59.50 | Clostridiales      | 9821   | 1943504 |
| Sample_SPC03.Cluster7720        | 42.80 | Clostridiales      | 127365 | 2506866 |
| Sample_SPC03.mb.24cbin.1        | 48.70 | Clostridiales      | 12374  | 2378206 |
| Sample_SPC03.mb.49              | 52.70 | Clostridiales      | 214386 | 2049843 |
| Sample_SPC03.mb.92cbin.1        | 58.50 | Bacteria           | 19217  | 2772045 |
| Sample_SPC03.mb.22cbin.1        | 48.70 | Lachnospiraceae    | 10940  | 2632924 |
| Sample_SPC03.Cluster10177       | 40.70 | Clostridiales      | 171656 | 2661963 |
| Sample_SPC03.mb.48              | 62.50 | Clostridiales      | 28893  | 1737994 |
| Sample_SPC03.Cluster5710cbin.1  | 45.90 | Clostridiales      | 62286  | 2476003 |
| Sample_SPC03.mb.103             | 41.60 | Lachnospiraceae    | 20128  | 3282121 |
| Sample_SPC03.mb.104cbin.1       | 54.40 | Bacteroidetes      | 72819  | 2424990 |
| Sample_SPC03.mb.6cbin.1         | 58.00 | Clostridiales      | 59952  | 3201971 |
| Sample_SPC03.mb.106             | 59.40 | Bacteroidetes      | 86325  | 2748097 |
| Sample_SPC03.Cluster8613cbin.1  | 43.00 | Clostridiales      | 179532 | 2612365 |
| Sample_SPC03.mb.35cbin.1        | 43.70 | Selenomonadales    | 13641  | 2336817 |
| Sample_SPC03.mb.44              | 60.80 | Clostridiales      | 34648  | 2169663 |
| Sample_SPC03.mb.113cbin.1       | 48.40 | Bacteroidales      | 120013 | 3492007 |
| Sample_SPC03.mb.97cbin.1        | 61.20 | Clostridiales      | 38092  | 1855148 |
| Sample_SPC03.mb.57              | 34.00 | Clostridiales      | 51199  | 1825788 |
| Sample_SPC03.mb.2cbin.1         | 43.30 | Lachnospiraceae    | 112565 | 3032738 |
| Sample_SPC03.mb.86cbin.1        | 45.00 | Clostridiales      | 81252  | 2569810 |
| Sample_SPC03.mb.114             | 41.50 | Lachnospiraceae    | 71114  | 3283189 |
| Sample_SPC03.mb.12              | 46.60 | Bacteroidales      | 43088  | 4199084 |
| Sample_SPC03.mb.46              | 43.30 | Bacteroidales      | 13679  | 2981963 |
| Sample_SPC03.Cluster708         | 57.90 | Enterobacteriaceae | 172750 | 5014539 |
| Sample_SPC04.Cluster214cbin.1   | 61.00 | Clostridiales      | 39535  | 1852884 |
| Sample_SPC04.Cluster376cbin.1   | 58.60 | Clostridiales      | 53821  | 2030156 |
| Sample_SPC04.mb.6               | 52.50 | Clostridia         | 68513  | 2299491 |
| Sample_SPC04.Cluster1117cbin.1  | 56.90 | Clostridiales      | 92085  | 2144360 |
| Sample_SPC04.mb.13              | 54.10 | Actinobacteria     | 175952 | 1639829 |
| Sample_SPC04.mb.76              | 26.10 | Bacteria           | 81950  | 1254449 |
| Sample_SPC04.mb.80              | 26.80 | Bacteria           | 77303  | 1190138 |
| Sample_SPC04.Cluster5731cbin.1  | 45.40 | Clostridiales      | 7682   | 2151617 |
| Sample_SPC04.mb.54cbin.1        | 57.80 | Clostridiales      | 7236   | 1874670 |
| Sample_SPC04.mb.34              | 60.30 | Actinobacteria     | 9206   | 1800935 |
| Sample_SPC04.mb.78cbin.1        | 49.60 | Clostridiales      | 85698  | 1819410 |
| Sample_SPC04.Cluster5253        | 46.90 | Selenomonadales    | 126839 | 2280852 |
| Sample_SPC04.Cluster120cbin.1   | 60.90 | Bifidobacteriaceae | 6869   | 1527673 |
| Sample_SPC04.Cluster907cbin.1   | 57.30 | Proteobacteria     | 20003  | 1918200 |
| Sample_SPC04.mb.15cbin.1        | 63.60 | Actinobacteria     | 16800  | 2678006 |
| Sample_SPC04.mb.29cbin.1        | 54.20 | Bacteroidetes      | 126174 | 2209986 |
| Sample_SPC04.Cluster11760cbin.1 | 43.90 | Clostridiales      | 111068 | 2774094 |
| Sample_SPC04.Cluster8782        | 43.90 | Clostridiales      | 191943 | 2775057 |
| Sample_SPC04.mb.83cbin.1        | 58.10 | Clostridiales      | 49464  | 3101593 |
| Sample_SPC04.mb.22cbin.1        | 43.00 | Prevotella         | 29864  | 3318643 |
| Sample_SPC04.mb.47              | 37.80 | Clostridiales      | 202346 | 1895224 |
| Sample_SPC04.mb.59cbin.1        | 56.40 | Clostridiales      | 12268  | 2470005 |
| Sample_SPC04.Cluster5803cbin.1  | 44.20 | Prevotella         | 13429  | 3535800 |
| Sample_SPC04.mb.85              | 62.50 | Clostridiales      | 35020  | 1984498 |
| Sample_SPC04.Cluster3414cbin.1  | 55.50 | Proteobacteria     | 11162  | 2532757 |
| Sample_SPC04.mb.65cbin.1        | 50.50 | Lachnospiraceae    | 8598   | 2404032 |
| Sample_SPC04.mb.93              | 59.10 | Bacteroidetes      | 5341   | 1988323 |

|                                |       |                    |        |         |
|--------------------------------|-------|--------------------|--------|---------|
| Sample_SPC04.mb.82cbin.1       | 51.70 | Clostridiales      | 198401 | 2101425 |
| Sample_SPC04.mb.87             | 54.70 | Bacteroidetes      | 619008 | 2548926 |
| Sample_SPC04.mb.81             | 43.60 | Lachnospiraceae    | 28084  | 2921042 |
| Sample_SPC04.mb.89             | 35.70 | Clostridiales      | 72972  | 2874600 |
| Sample_SPC04.mb.62cbin.1       | 27.90 | Clostridiales      | 229902 | 3251121 |
| Sample_SPC04.mb.69cbin.1       | 45.30 | Bacteroidales      | 40175  | 4019238 |
| Sample_SPC04.mb.88cbin.1       | 45.00 | Bacteroidales      | 64944  | 4823707 |
| Sample_SPC04.mb.92cbin.1       | 50.70 | Enterobacteriaceae | 128118 | 4603732 |
| Sample_SPC06.Cluster3248cbin.1 | 49.40 | Clostridia         | 123425 | 1515389 |
| Sample_SPC06.Cluster1387cbin.1 | 53.30 | Clostridia         | 39280  | 2067376 |
| Sample_SPC06.mb.44cbin.1       | 27.30 | Bacteria           | 632868 | 1104318 |
| Sample_SPC06.Cluster694        | 58.30 | Clostridiales      | 69104  | 2870881 |
| Sample_SPC06.Cluster5415       | 41.80 | Clostridiales      | 161610 | 2291717 |
| Sample_SPC06.Cluster328cbin.1  | 57.80 | Clostridiales      | 47468  | 2764307 |
| Sample_SPC06.mb.48             | 61.90 | Clostridiales      | 53859  | 2106449 |
| Sample_SPC06.Cluster1832cbin.1 | 54.30 | Clostridiales      | 209233 | 1724389 |
| Sample_SPC06.mb.55             | 44.30 | Clostridiales      | 68959  | 2752342 |
| Sample_SPC06.mb.71cbin.1       | 61.20 | Clostridiales      | 70166  | 1849043 |
| Sample_SPC06.Cluster1121       | 52.40 | Clostridiales      | 208242 | 1996185 |
| Sample_SPC06.Cluster5959cbin.1 | 38.50 | Clostridiales      | 117374 | 2020603 |
| Sample_SPC06.mb.21cbin.1       | 46.00 | Clostridiales      | 11969  | 2991236 |
| Sample_SPC06.mb.13             | 40.80 | Clostridiales      | 296856 | 1994691 |
| Sample_SPC06.mb.8              | 49.80 | Clostridiales      | 75742  | 2697495 |
| Sample_SPC06.mb.74             | 58.80 | Clostridiales      | 105292 | 2073213 |
| Sample_SPC06.mb.78cbin.1       | 57.10 | Clostridiales      | 60288  | 2138243 |
| Sample_SPC06.mb.35             | 45.90 | Clostridiales      | 12105  | 2188631 |
| Sample_SPC06.Cluster1414       | 56.40 | Bifidobacteriaceae | 260290 | 2152961 |
| Sample_SPC06.Cluster5280cbin.1 | 42.80 | Lachnospiraceae    | 41390  | 2584680 |
| Sample_SPC06.mb.86             | 56.60 | Clostridiales      | 48867  | 2218837 |
| Sample_SPC06.mb.81             | 41.00 | Lachnospiraceae    | 40876  | 2784782 |
| Sample_SPC06.mb.72cbin.1       | 56.30 | Clostridiales      | 16390  | 2612311 |
| Sample_SPC06.mb.59cbin.1       | 58.40 | Bacteria           | 28201  | 2874987 |
| Sample_SPC06.mb.65             | 50.90 | Clostridiales      | 48239  | 2493101 |
| Sample_SPC06.mb.58cbin.1       | 44.00 | Clostridiales      | 15608  | 2616764 |
| Sample_SPC06.mb.68cbin.1       | 59.90 | Bacteroidetes      | 46448  | 2734681 |
| Sample_SPC06.mb.27             | 41.90 | Lachnospiraceae    | 60364  | 2525863 |
| Sample_SPC06.Cluster4605       | 45.20 | Bacteroidales      | 200827 | 4192553 |
| Sample_SPC06.Cluster1874cbin.1 | 45.30 | Bacteroidales      | 11002  | 4087168 |
| Sample_SPC06.mb.38             | 47.00 | Bacteroidales      | 25864  | 3656544 |
| Sample_SPC07.Cluster12284      | 29.80 | Bacteria           | 28150  | 2445658 |
| Sample_SPC07.mb.117cbin.1      | 25.20 | Bacteria           | 96125  | 1024301 |
| Sample_SPC07.Cluster12882      | 32.30 | Clostridiales      | 186627 | 2646836 |
| Sample_SPC07.Cluster7505cbin.1 | 43.70 | Clostridiales      | 10690  | 2437325 |
| Sample_SPC07.Cluster187cbin.1  | 61.20 | Clostridiales      | 110705 | 2035991 |
| Sample_SPC07.Cluster5885cbin.1 | 48.60 | Clostridiales      | 44936  | 2803520 |
| Sample_SPC07.Cluster8839cbin.1 | 41.40 | Clostridiales      | 6270   | 2941896 |
| Sample_SPC07.Cluster82cbin.1   | 61.40 | Clostridiales      | 24392  | 1836357 |
| Sample_SPC07.Cluster907        | 58.10 | Clostridiales      | 49518  | 1830295 |
| Sample_SPC07.Cluster598cbin.1  | 58.10 | Clostridiales      | 49834  | 2754068 |
| Sample_SPC07.Cluster923cbin.1  | 56.80 | Clostridiales      | 46306  | 2529899 |
| Sample_SPC07.Cluster7094       | 45.30 | Selenomonadales    | 140490 | 1981379 |
| Sample_SPC07.Cluster4915cbin.1 | 48.60 | Firmicutes         | 33738  | 1918340 |
| Sample_SPC07.mb.107            | 55.40 | Bacteroidales      | 22927  | 2578336 |
| Sample_SPC07.mb.12             | 51.90 | Clostridiales      | 18535  | 2019258 |
| Sample_SPC07.Cluster3423       | 54.70 | Bacteroidetes      | 221228 | 2868039 |
| Sample_SPC07.mb.4              | 26.60 | Bacteria           | 159125 | 1330363 |
| Sample_SPC07.Cluster120        | 60.10 | Bifidobacteriaceae | 87863  | 2286855 |
| Sample_SPC07.Cluster2242       | 55.50 | Proteobacteria     | 161345 | 2278192 |



|                                 |       |                    |        |         |
|---------------------------------|-------|--------------------|--------|---------|
| Sample_SPC07.Cluster12260       | 32.80 | Lactobacillales    | 334979 | 1895779 |
| Sample_SPC07.mb.120             | 46.90 | Lachnospiraceae    | 56403  | 2473569 |
| Sample_SPC07.mb.32cbin.1        | 48.90 | Clostridiales      | 161931 | 2083020 |
| Sample_SPC07.Cluster11122       | 37.20 | Clostridiales      | 136702 | 2826365 |
| Sample_SPC07.mb.108             | 40.70 | Clostridiales      | 217424 | 2017874 |
| Sample_SPC07.Cluster8152cbin.1  | 44.10 | Clostridiales      | 167962 | 2662939 |
| Sample_SPC07.mb.18              | 54.70 | Clostridiales      | 32282  | 2573208 |
| Sample_SPC07.mb.41              | 58.40 | Clostridiales      | 59105  | 2873161 |
| Sample_SPC07.mb.118cbin.1       | 53.60 | Clostridiales      | 53408  | 2189369 |
| Sample_SPC07.Cluster12891       | 31.30 | Firmicutes         | 53966  | 2377190 |
| Sample_SPC07.mb.25              | 59.20 | Clostridiales      | 15692  | 2177532 |
| Sample_SPC07.Cluster8463        | 43.50 | Bacteroidales      | 192320 | 3023405 |
| Sample_SPC07.mb.93              | 49.50 | Clostridiales      | 78068  | 1954408 |
| Sample_SPC07.mb.30              | 54.30 | Bacteroidetes      | 97538  | 2119001 |
| Sample_SPC07.Cluster5320cbin.1  | 48.60 | Bacteroidales      | 59635  | 3664538 |
| Sample_SPC07.mb.42              | 59.60 | Actinobacteria     | 118902 | 2139090 |
| Sample_SPC07.mb.82cbin.1        | 60.90 | Clostridiales      | 56410  | 1915419 |
| Sample_SPC07.mb.85              | 47.10 | Clostridiales      | 59628  | 1620196 |
| Sample_SPC07.mb.8               | 57.00 | Clostridiales      | 76461  | 1990261 |
| Sample_SPC07.Cluster8650cbin.1  | 43.30 | Bacteria           | 44163  | 4022717 |
| Sample_SPC07.mb.23              | 42.10 | Lachnospiraceae    | 43286  | 2304317 |
| Sample_SPC07.mb.63              | 47.00 | Clostridiales      | 27762  | 2009699 |
| Sample_SPC07.mb.88cbin.1        | 53.70 | Clostridiales      | 17446  | 2291151 |
| Sample_SPC07.Cluster6991        | 45.40 | Bacteroidales      | 94633  | 4255990 |
| Sample_SPC07.mb.75              | 57.50 | Clostridiales      | 12123  | 1817475 |
| Sample_SPC07.mb.47              | 58.40 | Clostridiales      | 33073  | 2302177 |
| Sample_SPC07.mb.96              | 59.30 | Bacteroidetes      | 124830 | 2801739 |
| Sample_SPC07.mb.78cbin.1        | 49.10 | Lachnospiraceae    | 86602  | 3080795 |
| Sample_SPC07.mb.71              | 45.40 | Bacteroidales      | 62542  | 3995957 |
| Sample_SPC07.mb.95              | 58.70 | Bacteroidetes      | 215479 | 3006495 |
| Sample_SPC08.Cluster17317       | 26.40 | Bacteria           | 89838  | 1090539 |
| Sample_SPC08.Cluster17466       | 24.00 | Bacteria           | 87371  | 969083  |
| Sample_SPC08.Cluster160cbin.1   | 59.40 | Clostridiales      | 79101  | 2159496 |
| Sample_SPC08.Cluster3332cbin.1  | 54.90 | Clostridia         | 131999 | 2838474 |
| Sample_SPC08.Cluster1267        | 58.10 | Clostridiales      | 112868 | 1974893 |
| Sample_SPC08.mb.118             | 25.50 | Bacteria           | 146661 | 1338112 |
| Sample_SPC08.Cluster351cbin.1   | 59.30 | Clostridiales      | 136739 | 2251397 |
| Sample_SPC08.mb.10              | 58.10 | Clostridiales      | 50728  | 2977041 |
| Sample_SPC08.Cluster5062cbin.1  | 50.20 | Clostridiales      | 218747 | 2173629 |
| Sample_SPC08.Cluster315cbin.1   | 58.00 | Bacteroidetes      | 7960   | 2027439 |
| Sample_SPC08.Cluster219cbin.1   | 61.00 | Clostridiales      | 16660  | 2203895 |
| Sample_SPC08.Cluster14570cbin.1 | 38.00 | Clostridiales      | 58719  | 1847889 |
| Sample_SPC08.Cluster4847cbin.1  | 51.40 | Clostridiales      | 126730 | 2040574 |
| Sample_SPC08.mb.29              | 29.30 | Bacteria           | 147827 | 1535129 |
| Sample_SPC08.Cluster7170        | 45.90 | Selenomonadales    | 324776 | 1941873 |
| Sample_SPC08.mb.110             | 50.10 | Clostridiales      | 50264  | 2022036 |
| Sample_SPC08.Cluster7553        | 46.40 | Bacteroidetes      | 287051 | 2364620 |
| Sample_SPC08.Cluster15847       | 35.80 | Clostridiales      | 207465 | 2558013 |
| Sample_SPC08.Cluster588cbin.1   | 56.00 | Proteobacteria     | 20004  | 2099610 |
| Sample_SPC08.Cluster6706cbin.1  | 43.50 | Selenomonadales    | 316579 | 2409582 |
| Sample_SPC08.mb.113             | 54.40 | Clostridiales      | 11569  | 2648533 |
| Sample_SPC08.Cluster509         | 60.40 | Bifidobacteriaceae | 66692  | 1909429 |
| Sample_SPC08.mb.11              | 46.30 | Lachnospiraceae    | 82090  | 2666905 |
| Sample_SPC08.mb.66              | 28.00 | Bacteria           | 33617  | 1149135 |
| Sample_SPC08.mb.54              | 29.40 | Bacteria           | 55047  | 1818150 |
| Sample_SPC08.Cluster9250        | 44.40 | Clostridiales      | 138732 | 2265630 |
| Sample_SPC08.Cluster15302cbin.1 | 40.60 | Lachnospiraceae    | 71599  | 3410357 |
| Sample_SPC08.mb.26              | 60.90 | Clostridiales      | 76089  | 2025719 |

|                                |       |                    |        |         |
|--------------------------------|-------|--------------------|--------|---------|
| Sample_SPC08.Cluster9757       | 43.90 | Clostridiales      | 198514 | 2804396 |
| Sample_SPC08.mb.124            | 46.70 | Lachnospiraceae    | 12240  | 2723013 |
| Sample_SPC08.mb.127            | 59.10 | Clostridiales      | 10551  | 2175795 |
| Sample_SPC08.Cluster9827cbin.1 | 45.30 | Prevotella         | 60593  | 3339606 |
| Sample_SPC08.mb.93             | 26.70 | Bacteria           | 92921  | 1132717 |
| Sample_SPC08.Cluster5156cbin.1 | 46.90 | Bacteroidales      | 42628  | 2996348 |
| Sample_SPC08.mb.56             | 39.90 | Clostridiales      | 6184   | 1616308 |
| Sample_SPC08.mb.91             | 52.90 | Clostridia         | 74474  | 2050943 |
| Sample_SPC08.mb.58             | 56.10 | Clostridiales      | 14568  | 2163126 |
| Sample_SPC08.mb.49             | 51.00 | Bacteria           | 102907 | 2209582 |
| Sample_SPC08.mb.18cbin.1       | 59.90 | Bacteroidetes      | 52988  | 2550209 |
| Sample_SPC08.mb.79             | 36.50 | Clostridiales      | 11512  | 2233548 |
| Sample_SPC08.Cluster7435cbin.1 | 43.20 | Bacteria           | 15170  | 3812151 |
| Sample_SPC08.mb.4              | 40.70 | Clostridiales      | 9899   | 1945737 |
| Sample_SPC08.mb.76             | 56.50 | Clostridiales      | 48438  | 2508229 |
| Sample_SPC08.mb.51             | 54.60 | Bacteroidetes      | 86233  | 2168076 |
| Sample_SPC08.mb.55             | 63.40 | Actinobacteria     | 32373  | 2670467 |
| Sample_SPC08.Cluster7176cbin.1 | 46.10 | Bacteroidales      | 130677 | 4305575 |
| Sample_SPC08.mb.61             | 42.10 | Lachnospiraceae    | 14642  | 2143108 |
| Sample_SPC08.mb.9              | 44.80 | Lachnospiraceae    | 83185  | 2894630 |
| Sample_SPC08.mb.41             | 56.10 | Enterobacteriaceae | 17004  | 4569273 |
| Sample_SPC09.Cluster31cbin.1   | 62.00 | Clostridiales      | 9673   | 1562209 |
| Sample_SPC09.Cluster1936cbin.1 | 55.50 | Clostridiales      | 52694  | 2379470 |
| Sample_SPC09.Cluster90         | 60.80 | Clostridiales      | 55271  | 1633513 |
| Sample_SPC09.Cluster8082cbin.1 | 41.20 | Lachnospiraceae    | 86388  | 3478642 |
| Sample_SPC09.Cluster2849cbin.1 | 48.70 | Firmicutes         | 32301  | 1939965 |
| Sample_SPC09.mb.12             | 49.10 | Clostridiales      | 22186  | 2465841 |
| Sample_SPC09.mb.33             | 46.80 | Lachnospiraceae    | 77829  | 2648893 |
| Sample_SPC09.mb.16             | 60.00 | Clostridiales      | 51783  | 2206655 |
| Sample_SPC09.Cluster5456       | 43.70 | Selenomonadales    | 172774 | 2325988 |
| Sample_SPC09.mb.29             | 40.90 | Clostridiales      | 153460 | 1983742 |
| Sample_SPC09.mb.69             | 41.10 | Clostridiales      | 9537   | 3027331 |
| Sample_SPC09.mb.67cbin.1       | 52.20 | Clostridiales      | 73673  | 2313626 |
| Sample_SPC09.Cluster2177cbin.1 | 48.90 | Proteobacteria     | 6332   | 2011699 |
| Sample_SPC09.Cluster5059cbin.1 | 43.40 | Lachnospiraceae    | 100745 | 3021833 |
| Sample_SPC09.mb.21             | 41.30 | Clostridiales      | 216384 | 2657366 |
| Sample_SPC09.Cluster6794cbin.1 | 40.50 | Clostridiales      | 27099  | 2909433 |
| Sample_SPC09.Cluster6170       | 41.30 | Lachnospiraceae    | 116139 | 2856461 |
| Sample_SPC09.Cluster6340cbin.1 | 43.40 | Bacteroidales      | 317455 | 3231604 |
| Sample_SPC09.mb.87cbin.1       | 53.70 | Bacteroidetes      | 108964 | 2324595 |
| Sample_SPC09.Cluster5921cbin.1 | 42.00 | Bacteroidales      | 24068  | 4184248 |
| Sample_SPC09.mb.82             | 42.80 | Lachnospiraceae    | 92515  | 3253840 |
| Sample_SPC09.Cluster4566cbin.1 | 47.90 | Enterobacteriaceae | 233134 | 4491581 |
| Sample_SPC09.mb.83             | 46.30 | Bacteroidales      | 176901 | 4385809 |
| Sample_SPC09.mb.73cbin.1       | 45.20 | Bacteroidales      | 39300  | 4726584 |
| Sample_SPC10.Cluster2969       | 41.80 | Clostridiales      | 95246  | 2649710 |
| Sample_SPC10.mb.10             | 61.50 | Clostridiales      | 191935 | 2036074 |
| Sample_SPC10.Cluster27         | 62.20 | Clostridiales      | 237465 | 1883809 |
| Sample_SPC10.Cluster2394cbin.1 | 48.10 | Clostridiales      | 55743  | 2815487 |
| Sample_SPC10.Cluster1785       | 47.10 | Lactobacillales    | 23603  | 1666945 |
| Sample_SPC10.mb.20             | 49.50 | Clostridiales      | 15966  | 2286244 |
| Sample_SPC10.mb.26             | 49.00 | Clostridiales      | 59543  | 2516989 |
| Sample_SPC10.Cluster4267cbin.1 | 38.80 | Clostridiales      | 96900  | 2113818 |
| Sample_SPC10.mb.11             | 38.50 | Selenomonadales    | 18101  | 1752837 |
| Sample_SPC10.Cluster5577cbin.1 | 35.90 | Clostridiales      | 106531 | 2388287 |
| Sample_SPC10.mb.23cbin.1       | 57.00 | Proteobacteria     | 426618 | 2553360 |
| Sample_SPC10.mb.12cbin.1       | 61.50 | Clostridiales      | 41392  | 3434189 |
| Sample_SPC10.mb.49cbin.1       | 60.30 | Clostridiales      | 41693  | 1948065 |

|                                 |       |                     |        |         |
|---------------------------------|-------|---------------------|--------|---------|
| Sample_SPC10.Cluster4683cbin.1  | 41.20 | Lachnospiraceae     | 90856  | 3162184 |
| Sample_SPC10.mb.46cbin.1        | 57.20 | Clostridiales       | 38343  | 2331010 |
| Sample_SPC10.mb.73              | 58.80 | Clostridiales       | 47126  | 2028333 |
| Sample_SPC10.mb.2               | 28.40 | Clostridiales       | 12197  | 3372848 |
| Sample_SPC10.mb.34              | 43.80 | Lachnospiraceae     | 19559  | 2727914 |
| Sample_SPC10.mb.59cbin.1        | 48.40 | Proteobacteria      | 18121  | 2526340 |
| Sample_SPC10.Cluster2004cbin.1  | 46.00 | Bacteroidales       | 166177 | 3396701 |
| Sample_SPC10.mb.37              | 41.30 | Clostridiales       | 43298  | 3484938 |
| Sample_SPC10.mb.29cbin.1        | 46.50 | Bacteroidales       | 103539 | 3660915 |
| Sample_SPC10.mb.1cbin.1         | 44.90 | Bacteroidales       | 21643  | 4526016 |
| Sample_SPC10.Cluster3694cbin.1  | 41.30 | Bacteroides         | 50838  | 5804466 |
| Sample_SPC10.mb.62cbin.1        | 41.40 | Bacteroidales       | 233826 | 5177610 |
| Sample_SPC10.Cluster140         | 57.60 | Enterobacteriaceae  | 226510 | 5332752 |
| Sample_SPC11.Cluster4048        | 48.90 | Clostridia          | 137216 | 2029114 |
| Sample_SPC11.Cluster2715cbin.1  | 48.30 | Clostridiales       | 12921  | 1825477 |
| Sample_SPC11.Cluster288         | 60.50 | Clostridiales       | 99176  | 1577842 |
| Sample_SPC11.Cluster5831        | 41.70 | Clostridiales       | 177747 | 2825549 |
| Sample_SPC11.Cluster4863        | 45.30 | Actinobacteria      | 245551 | 1930517 |
| Sample_SPC11.Cluster134cbin.1   | 59.20 | Deltaproteobacteria | 11487  | 2170356 |
| Sample_SPC11.Cluster10732cbin.1 | 33.40 | Bacteria            | 31593  | 2403241 |
| Sample_SPC11.Cluster160         | 59.80 | Actinobacteria      | 101576 | 2221869 |
| Sample_SPC11.Cluster294cbin.1   | 60.80 | Clostridiales       | 18771  | 2271339 |
| Sample_SPC11.Cluster4327cbin.1  | 47.00 | Selenomonadales     | 71380  | 2223967 |
| Sample_SPC11.Cluster1525cbin.1  | 53.90 | Clostridiales       | 11254  | 1936872 |
| Sample_SPC11.Cluster6659cbin.1  | 44.90 | Prevotella          | 7312   | 2476490 |
| Sample_SPC11.Cluster2946        | 51.70 | Clostridiales       | 224275 | 2183225 |
| Sample_SPC11.Cluster83cbin.1    | 58.40 | Clostridiales       | 68142  | 2388908 |
| Sample_SPC11.mb.104             | 62.50 | Clostridiales       | 9629   | 2110166 |
| Sample_SPC11.Cluster1285        | 55.60 | Proteobacteria      | 150094 | 2232840 |
| Sample_SPC11.Cluster1447cbin.1  | 59.60 | Bacteroidetes       | 73033  | 2824640 |
| Sample_SPC11.mb.119             | 48.40 | Clostridiales       | 35371  | 2806547 |
| Sample_SPC11.mb.133cbin.1       | 62.40 | Clostridiales       | 38277  | 1903361 |
| Sample_SPC11.Cluster8333        | 40.60 | Clostridiales       | 175458 | 1999321 |
| Sample_SPC11.Cluster6575        | 43.70 | Lachnospiraceae     | 106824 | 2822123 |
| Sample_SPC11.Cluster10755cbin.1 | 35.60 | Clostridiales       | 49695  | 2760232 |
| Sample_SPC11.mb.53              | 26.70 | Bacteria            | 140798 | 1297900 |
| Sample_SPC11.Cluster6755cbin.1  | 43.00 | Clostridiales       | 147522 | 2498876 |
| Sample_SPC11.Cluster10067cbin.1 | 36.70 | Clostridiales       | 124127 | 3113755 |
| Sample_SPC11.mb.105             | 42.50 | Streptococcus       | 22574  | 1715223 |
| Sample_SPC11.mb.41              | 57.10 | Clostridiales       | 20069  | 2367049 |
| Sample_SPC11.mb.116cbin.1       | 60.40 | Bifidobacteriaceae  | 81868  | 1898433 |
| Sample_SPC11.Cluster6184        | 43.50 | Bacteroidales       | 271351 | 3266432 |
| Sample_SPC11.mb.40cbin.1        | 47.30 | Lactobacillales     | 10267  | 1580729 |
| Sample_SPC11.mb.10              | 41.60 | Lachnospiraceae     | 83157  | 2760543 |
| Sample_SPC11.mb.114             | 43.80 | Clostridiales       | 158634 | 2812922 |
| Sample_SPC11.mb.24              | 54.20 | Bacteroidetes       | 111865 | 2143327 |
| Sample_SPC11.mb.76              | 32.70 | Bacteria            | 124465 | 1901296 |
| Sample_SPC11.Cluster2437cbin.1  | 42.10 | Bacteroidales       | 34624  | 4605519 |
| Sample_SPC11.mb.136             | 41.90 | Clostridiales       | 48239  | 2956248 |
| Sample_SPC11.mb.2               | 56.50 | Bifidobacteriaceae  | 107227 | 2037400 |
| Sample_SPC11.mb.51              | 38.50 | Clostridiales       | 38793  | 4034840 |
| Sample_SPC11.mb.46              | 47.10 | Lachnospiraceae     | 19644  | 2635379 |
| Sample_SPC11.mb.64              | 56.10 | Clostridiales       | 64418  | 2540970 |
| Sample_SPC11.mb.3cbin.1         | 56.20 | Clostridiales       | 13899  | 2441779 |
| Sample_SPC11.Cluster4045cbin.1  | 45.00 | Bacteroidales       | 156211 | 4223253 |
| Sample_SPC11.mb.75              | 57.50 | Clostridiales       | 20163  | 2689400 |
| Sample_SPC11.mb.70cbin.1        | 45.90 | Clostridiales       | 133504 | 2131277 |
| Sample_SPC11.mb.82cbin.1        | 58.90 | Clostridiales       | 28123  | 1930758 |

|                                 |       |                     |        |         |
|---------------------------------|-------|---------------------|--------|---------|
| Sample_SPC11.mb.47              | 59.40 | Bacteroidetes       | 119813 | 2867519 |
| Sample_SPC11.mb.56              | 30.00 | Bacteria            | 5306   | 2019574 |
| Sample_SPC11.mb.110             | 40.60 | Bacteroidales       | 36280  | 3409697 |
| Sample_SPC11.mb.6               | 58.40 | Bacteroidetes       | 134645 | 2577852 |
| Sample_SPC11.mb.44              | 36.60 | Lactobacillales     | 23950  | 2069245 |
| Sample_SPC11.mb.66              | 44.30 | Clostridiales       | 48866  | 2574340 |
| Sample_SPC11.mb.95cbin.1        | 63.00 | Bacteroidetes       | 15073  | 2270058 |
| Sample_SPC11.mb.37cbin.1        | 45.60 | Bacteroidales       | 12790  | 4045552 |
| Sample_SPC11.mb.99              | 46.10 | Bacteroidales       | 89387  | 2959829 |
| Sample_SPC11.mb.73cbin.1        | 44.10 | Bacteroidales       | 72544  | 3567801 |
| Sample_SPC11.mb.86cbin.1        | 46.50 | Bacteroidales       | 89600  | 4216496 |
| Sample_SPC11.mb.94              | 43.30 | Bacteria            | 34724  | 3912491 |
| Sample_SPC12.mb.1               | 60.00 | Bacteria            | 25356  | 1938643 |
| Sample_SPC12.Cluster15328cbin.1 | 37.20 | Clostridiales       | 5523   | 2146266 |
| Sample_SPC12.Cluster5908cbin.1  | 53.90 | Clostridia          | 13353  | 1716697 |
| Sample_SPC12.Cluster17469       | 27.70 | Euryarchaeota       | 5894   | 1222930 |
| Sample_SPC12.mb.103             | 26.60 | Bacteria            | 100427 | 1290544 |
| Sample_SPC12.Cluster480         | 60.00 | Bacteria            | 74673  | 3206878 |
| Sample_SPC12.mb.126             | 52.80 | Clostridia          | 69518  | 2056828 |
| Sample_SPC12.Cluster2893cbin.1  | 56.90 | Bacteroidetes       | 184726 | 2121579 |
| Sample_SPC12.Cluster6801cbin.1  | 49.90 | Clostridiales       | 130146 | 2352852 |
| Sample_SPC12.Cluster13456       | 41.70 | Clostridiales       | 122547 | 2398350 |
| Sample_SPC12.Cluster2319        | 56.80 | Clostridiales       | 128879 | 2100377 |
| Sample_SPC12.Cluster14444cbin.1 | 38.40 | Clostridiales       | 56188  | 2186557 |
| Sample_SPC12.Cluster13847cbin.1 | 37.60 | Clostridiales       | 9794   | 2293487 |
| Sample_SPC12.Cluster11106cbin.1 | 45.20 | Prevotella          | 12353  | 3052891 |
| Sample_SPC12.mb.36              | 26.30 | Bacteria            | 128570 | 1248956 |
| Sample_SPC12.mb.138             | 57.80 | Clostridiales       | 6872   | 2124461 |
| Sample_SPC12.mb.131             | 55.10 | Clostridiales       | 6819   | 2219244 |
| Sample_SPC12.mb.107             | 56.50 | Clostridiales       | 14498  | 2360253 |
| Sample_SPC12.mb.117cbin.1       | 45.00 | Clostridiales       | 128617 | 1656992 |
| Sample_SPC12.Cluster12531cbin.1 | 41.10 | Lachnospiraceae     | 80140  | 2605141 |
| Sample_SPC12.mb.32              | 36.40 | Clostridiales       | 182411 | 1856400 |
| Sample_SPC12.mb.114             | 60.10 | Bacteroidetes       | 24643  | 2651385 |
| Sample_SPC12.mb.122cbin.1       | 31.00 | Euryarchaeota       | 164912 | 1753125 |
| Sample_SPC12.mb.113cbin.1       | 42.60 | Lachnospiraceae     | 42302  | 2365451 |
| Sample_SPC12.mb.43              | 42.10 | Clostridiales       | 24402  | 2427175 |
| Sample_SPC12.mb.82cbin.1        | 29.00 | Bacteria            | 70008  | 1841249 |
| Sample_SPC12.mb.133cbin.1       | 60.00 | Bifidobacteriaceae  | 31243  | 1981533 |
| Sample_SPC12.mb.20              | 55.00 | Bacteroidetes       | 100602 | 2059523 |
| Sample_SPC12.mb.56cbin.1        | 68.10 | Actinobacteria      | 25568  | 1875474 |
| Sample_SPC12.mb.73              | 58.00 | Clostridiales       | 39696  | 3012528 |
| Sample_SPC12.mb.132             | 59.40 | Bacteroidetes       | 27425  | 2713690 |
| Sample_SPC12.mb.22              | 45.90 | Clostridiales       | 52851  | 2342857 |
| Sample_SPC12.mb.86              | 62.00 | Clostridiales       | 31026  | 1413500 |
| Sample_SPC12.mb.61              | 44.80 | Clostridiales       | 36578  | 2532227 |
| Sample_SPC12.mb.8               | 57.10 | Clostridiales       | 45278  | 2303990 |
| Sample_SPC12.Cluster9084cbin.1  | 45.30 | Bacteroidales       | 9329   | 3933257 |
| Sample_SPC12.mb.72cbin.1        | 59.10 | Deltaproteobacteria | 13650  | 2248058 |
| Sample_SPC12.mb.53              | 42.30 | Bacteroidales       | 66004  | 3051418 |
| Sample_SPC12.mb.81              | 60.00 | Bacteroidetes       | 61500  | 2661241 |
| Sample_SPC12.mb.137             | 47.00 | Bacteroidales       | 21377  | 3740119 |
| Sample_SPC12.mb.23              | 41.30 | Lachnospiraceae     | 57821  | 3708494 |
| Sample_SPC12.mb.60cbin.1        | 43.90 | Clostridiales       | 45135  | 2987042 |
| Sample_SPC12.mb.54              | 43.70 | Bacteroidales       | 135263 | 2953224 |
| Sample_SPC12.mb.4cbin.1         | 44.70 | Bacteroidales       | 89579  | 3082891 |
| Sample_SPC12.mb.91cbin.1        | 43.20 | Bacteria            | 27660  | 4012709 |
| Sample_SPC13.Cluster1460cbin.1  | 48.20 | Clostridia          | 26450  | 1892514 |

|                                |       |                    |        |         |
|--------------------------------|-------|--------------------|--------|---------|
| Sample_SPC13.Cluster7173       | 37.30 | Clostridiales      | 9050   | 1897016 |
| Sample_SPC13.Cluster8354       | 33.20 | Clostridiales      | 61716  | 2186718 |
| Sample_SPC13.Cluster7899cbin.1 | 35.90 | Clostridiales      | 198469 | 2004584 |
| Sample_SPC13.Cluster37cbin.1   | 59.50 | Clostridiales      | 7034   | 2529349 |
| Sample_SPC13.Cluster265cbin.1  | 60.40 | Bifidobacteriaceae | 89210  | 1851556 |
| Sample_SPC13.Cluster3818cbin.1 | 43.50 | Selenomonadales    | 138405 | 2528604 |
| Sample_SPC13.mb.37cbin.1       | 46.80 | Clostridiales      | 77062  | 1726463 |
| Sample_SPC13.Cluster6624       | 40.60 | Clostridiales      | 193412 | 2163052 |
| Sample_SPC13.Cluster4518cbin.1 | 44.50 | Clostridiales      | 114430 | 2564623 |
| Sample_SPC13.Cluster1373       | 54.20 | Proteobacteria     | 101610 | 2386308 |
| Sample_SPC13.mb.3              | 58.60 | Bacteroidetes      | 138544 | 2383413 |
| Sample_SPC13.mb.103            | 31.30 | Euryarchaeota      | 21951  | 1748688 |
| Sample_SPC13.mb.14cbin.1       | 59.80 | Bifidobacteriaceae | 215500 | 2066587 |
| Sample_SPC13.mb.47             | 59.90 | Clostridiales      | 115063 | 2077960 |
| Sample_SPC13.Cluster5690cbin.1 | 41.20 | Lachnospiraceae    | 63368  | 2943330 |
| Sample_SPC13.mb.29             | 60.10 | Bacteroidetes      | 72774  | 2590733 |
| Sample_SPC13.mb.52cbin.1       | 60.50 | Clostridiales      | 70988  | 2456418 |
| Sample_SPC13.mb.43             | 61.90 | Actinobacteria     | 25017  | 2155433 |
| Sample_SPC13.mb.55             | 61.90 | Clostridiales      | 38444  | 2387729 |
| Sample_SPC13.mb.49             | 57.50 | Clostridiales      | 33801  | 2731672 |
| Sample_SPC13.mb.88             | 52.60 | Clostridia         | 6172   | 1673310 |
| Sample_SPC13.Cluster8560cbin.1 | 31.30 | Firmicutes         | 67427  | 2446744 |
| Sample_SPC13.mb.59             | 48.40 | Clostridiales      | 32635  | 2748853 |
| Sample_SPC13.mb.72             | 54.60 | Actinobacteria     | 20716  | 1553417 |
| Sample_SPC13.mb.24cbin.1       | 59.30 | Bacteroidetes      | 102977 | 2711283 |
| Sample_SPC13.mb.20             | 41.90 | Lachnospiraceae    | 84512  | 2380042 |
| Sample_SPC13.mb.15             | 43.30 | Bacteroidales      | 293525 | 3156320 |
| Sample_SPC13.Cluster3275cbin.1 | 45.90 | Bacteroidales      | 118413 | 3473811 |
| Sample_SPC13.mb.57             | 60.10 | Bacteroidetes      | 106789 | 2691318 |
| Sample_SPC13.mb.9              | 41.30 | Clostridiales      | 24853  | 3199709 |
| Sample_SPC13.mb.53             | 43.30 | Lachnospiraceae    | 135214 | 3034808 |
| Sample_SPC13.Cluster5341cbin.1 | 45.40 | Bacteroidales      | 79608  | 4153032 |
| Sample_SPC13.mb.48cbin.1       | 57.00 | Clostridiales      | 59774  | 2516593 |
| Sample_SPC13.Cluster3765cbin.1 | 46.80 | Bacteroidales      | 62534  | 4103325 |
| Sample_SPC13.mb.79             | 54.70 | Bacteroidetes      | 95639  | 2125479 |
| Sample_SPC13.mb.66cbin.1       | 49.50 | Proteobacteria     | 5259   | 1635346 |
| Sample_SPC13.mb.83             | 36.40 | Clostridiales      | 81039  | 2105673 |
| Sample_SPC13.Cluster2319cbin.1 | 45.10 | Bacteroidales      | 54953  | 4698528 |
| Sample_SPC13.mb.76             | 36.20 | Clostridiales      | 65777  | 2530808 |
| Sample_SPC13.mb.8              | 50.40 | Clostridiales      | 15166  | 2736440 |
| Sample_SPC13.mb.56             | 40.50 | Bacteroidales      | 53838  | 2938770 |
| Sample_SPC13.mb.54             | 59.00 | Bacteroidetes      | 218648 | 3194810 |
| Sample_SPC13.mb.77             | 43.50 | Clostridiales      | 26149  | 3196856 |
| Sample_SPC13.mb.84             | 42.20 | Bacteroidales      | 74392  | 3614305 |
| Sample_SPC13.Cluster411        | 57.70 | Enterobacteriaceae | 259701 | 5089895 |
| Sample_SPC13.mb.70cbin.1       | 42.00 | Bacteroidales      | 62641  | 4735986 |
| Sample_SPC15.mb.26cbin.1       | 45.40 | Clostridia         | 39517  | 1793647 |
| Sample_SPC15.Cluster10481      | 37.60 | Clostridiales      | 166181 | 2100755 |
| Sample_SPC15.Cluster5266       | 42.00 | Clostridiales      | 15886  | 2507425 |
| Sample_SPC15.Cluster5521cbin.1 | 44.20 | Bacteroidales      | 141132 | 2247102 |
| Sample_SPC15.mb.22             | 61.10 | Clostridiales      | 53876  | 1936476 |
| Sample_SPC15.Cluster4826cbin.1 | 47.20 | Lachnospiraceae    | 21753  | 2636176 |
| Sample_SPC15.Cluster2952       | 47.20 | Selenomonadales    | 72871  | 2261220 |
| Sample_SPC15.Cluster6cbin.1    | 63.00 | Proteobacteria     | 7676   | 1743006 |
| Sample_SPC15.Cluster5604cbin.1 | 44.50 | Clostridiales      | 12214  | 2363309 |
| Sample_SPC15.mb.51             | 44.50 | Bacteroidales      | 29292  | 2539245 |
| Sample_SPC15.Cluster1367       | 53.00 | Lactobacillales    | 51592  | 1752594 |
| Sample_SPC15.Cluster11881      | 32.70 | Lactobacillales    | 136457 | 1862847 |

|                                |       |                    |        |         |
|--------------------------------|-------|--------------------|--------|---------|
| Sample_SPC15.mb.31             | 34.70 | Lactobacillus      | 8969   | 1642523 |
| Sample_SPC15.mb.30             | 43.60 | Lachnospiraceae    | 41183  | 3315649 |
| Sample_SPC15.mb.66             | 51.20 | Bacteroidales      | 51968  | 2289686 |
| Sample_SPC15.mb.17             | 38.50 | Selenomonadales    | 29793  | 2043372 |
| Sample_SPC15.mb.59             | 44.50 | Clostridiales      | 83947  | 2429741 |
| Sample_SPC15.mb.40             | 43.30 | Lachnospiraceae    | 16100  | 2951889 |
| Sample_SPC15.mb.72cbin.1       | 56.70 | Clostridiales      | 163790 | 2162216 |
| Sample_SPC15.mb.55             | 50.60 | Bacteroidales      | 118724 | 2195559 |
| Sample_SPC15.mb.80cbin.1       | 45.10 | Bacteroidales      | 43793  | 2877920 |
| Sample_SPC15.mb.48             | 58.60 | Bifidobacteriaceae | 24696  | 2354208 |
| Sample_SPC15.mb.83             | 51.50 | Clostridiales      | 56750  | 2051698 |
| Sample_SPC15.mb.25cbin.1       | 42.50 | Bacteroides        | 92287  | 5865089 |
| Sample_SPC15.Cluster2024cbin.1 | 50.90 | Enterobacteriaceae | 172271 | 4657877 |
| Sample_SPC16.mb.2              | 36.70 | Clostridiales      | 6408   | 2143002 |
| Sample_SPC16.Cluster4036cbin.1 | 48.20 | Clostridiales      | 30276  | 2881591 |
| Sample_SPC16.mb.29cbin.1       | 58.10 | Clostridiales      | 7346   | 1579621 |
| Sample_SPC16.Cluster8896       | 33.30 | Bacteria           | 56535  | 2293736 |
| Sample_SPC16.Cluster3365       | 43.50 | Selenomonadales    | 113579 | 2419140 |
| Sample_SPC16.Cluster799cbin.1  | 57.20 | Proteobacteria     | 30649  | 2007307 |
| Sample_SPC16.mb.25cbin.1       | 46.60 | Lachnospiraceae    | 22542  | 2899300 |
| Sample_SPC16.Cluster10140      | 32.50 | Lactobacillales    | 109275 | 1879687 |
| Sample_SPC16.mb.37             | 49.00 | Clostridiales      | 30237  | 2744185 |
| Sample_SPC16.Cluster7549cbin.1 | 37.40 | Clostridiales      | 135247 | 2740939 |
| Sample_SPC16.Cluster5477cbin.1 | 40.60 | Bacteroidales      | 35691  | 2857943 |
| Sample_SPC16.mb.27cbin.1       | 41.40 | Lachnospiraceae    | 90085  | 2886606 |
| Sample_SPC16.Cluster7014cbin.1 | 41.30 | Lachnospiraceae    | 59834  | 3515254 |
| Sample_SPC16.mb.71             | 26.70 | Clostridiales      | 126575 | 2708957 |
| Sample_SPC16.Cluster3708       | 45.50 | Bacteroidales      | 140398 | 4091399 |
| Sample_SPC16.mb.62             | 44.20 | Bacteroidales      | 71014  | 3419287 |
| Sample_SPC17.mb.37             | 48.00 | Clostridiales      | 93867  | 1952141 |
| Sample_SPC17.Cluster1353       | 46.80 | Lactobacillales    | 44701  | 1774024 |
| Sample_SPC17.Cluster1055       | 48.70 | Clostridiales      | 124392 | 2611213 |
| Sample_SPC17.Cluster306cbin.1  | 53.10 | Clostridiales      | 26353  | 2685819 |
| Sample_SPC17.mb.41             | 54.80 | Bacteroidetes      | 68843  | 2109939 |
| Sample_SPC17.Cluster1142cbin.1 | 43.60 | Selenomonadales    | 41417  | 2314974 |
| Sample_SPC17.Cluster2779cbin.1 | 37.00 | Clostridiales      | 9551   | 2550291 |
| Sample_SPC17.mb.60             | 37.30 | Lactobacillales    | 31795  | 1643805 |
| Sample_SPC17.mb.1cbin.1        | 41.30 | Lachnospiraceae    | 161084 | 2653461 |
| Sample_SPC17.Cluster1240       | 45.40 | Lactobacillales    | 21900  | 2161345 |
| Sample_SPC17.Cluster3452cbin.1 | 34.60 | Lactobacillus      | 12690  | 1823169 |
| Sample_SPC17.mb.28cbin.1       | 60.20 | Bifidobacteriaceae | 25131  | 2133393 |
| Sample_SPC17.Cluster48cbin.1   | 58.90 | Bifidobacteriaceae | 33087  | 1999540 |
| Sample_SPC17.mb.64cbin.1       | 60.30 | Bifidobacteriaceae | 33816  | 1819188 |
| Sample_SPC17.Cluster66cbin.1   | 59.70 | Clostridiales      | 39466  | 2155794 |
| Sample_SPC17.mb.51cbin.1       | 36.00 | Clostridiales      | 22936  | 2437875 |
| Sample_SPC17.mb.43cbin.1       | 48.70 | Proteobacteria     | 29171  | 2245817 |
| Sample_SPC17.mb.74cbin.1       | 58.80 | Clostridiales      | 64090  | 2462355 |
| Sample_SPC17.Cluster2305       | 38.80 | Lactobacillales    | 60957  | 4407976 |
| Sample_SPC17.Cluster887cbin.1  | 48.90 | Bacteroidales      | 16805  | 3277673 |
| Sample_SPC17.Cluster2479cbin.1 | 42.80 | Lachnospiraceae    | 101177 | 2868703 |
| Sample_SPC17.Cluster2998cbin.1 | 40.60 | Lachnospiraceae    | 56222  | 3143458 |
| Sample_SPC17.mb.2cbin.1        | 46.60 | Bacteroidales      | 120581 | 3864729 |
| Sample_SPC17.mb.45cbin.1       | 44.90 | Bacteroidales      | 11173  | 4135760 |
| Sample_SPC17.Cluster1300cbin.1 | 45.30 | Bacteroidales      | 131877 | 4382426 |
| Sample_SPC17.Cluster1839cbin.1 | 42.00 | Bacteroidales      | 94778  | 4318815 |
| Sample_SPC17.mb.73cbin.1       | 50.80 | Enterobacteriaceae | 139577 | 4612572 |
| Sample_SPC20.Cluster11157      | 29.50 | Bacteria           | 5239   | 1233172 |
| Sample_SPC20.Cluster6091cbin.1 | 46.10 | Clostridia         | 43043  | 1744271 |

|                                 |       |                 |        |         |
|---------------------------------|-------|-----------------|--------|---------|
| Sample_SPC20.mb.26cbin.1        | 25.90 | Bacteria        | 37188  | 1292988 |
| Sample_SPC20.mb.23              | 51.00 | Clostridia      | 20933  | 1612344 |
| Sample_SPC20.Cluster8391cbin.1  | 42.30 | Clostridiales   | 24943  | 2804218 |
| Sample_SPC20.mb.90              | 26.60 | Bacteria        | 33859  | 2653523 |
| Sample_SPC20.Cluster2624cbin.1  | 51.10 | Clostridiales   | 107984 | 2647035 |
| Sample_SPC20.mb.93              | 49.40 | Clostridiales   | 96139  | 1950849 |
| Sample_SPC20.Cluster6543        | 44.70 | Clostridiales   | 139110 | 2244985 |
| Sample_SPC20.mb.82              | 48.50 | Clostridiales   | 19839  | 2710311 |
| Sample_SPC20.mb.24cbin.1        | 51.10 | Clostridiales   | 487108 | 2059487 |
| Sample_SPC20.Cluster8953cbin.1  | 40.80 | Clostridiales   | 99094  | 2757667 |
| Sample_SPC20.mb.41              | 47.10 | Lachnospiraceae | 38482  | 3023604 |
| Sample_SPC20.mb.60cbin.1        | 54.60 | Bacteroidetes   | 21281  | 2432974 |
| Sample_SPC20.Cluster7734        | 43.30 | Lachnospiraceae | 210099 | 2821818 |
| Sample_SPC20.Cluster7449cbin.1  | 41.10 | Lachnospiraceae | 76709  | 2909142 |
| Sample_SPC20.Cluster4172cbin.1  | 48.70 | Proteobacteria  | 28597  | 2396775 |
| Sample_SPC20.mb.94              | 49.40 | Clostridiales   | 25861  | 2665803 |
| Sample_SPC20.mb.3               | 58.80 | Bacteroidetes   | 50313  | 2862448 |
| Sample_SPC20.mb.20              | 59.40 | Bacteroidetes   | 88152  | 2886779 |
| Sample_SPC20.mb.66              | 37.60 | Clostridiales   | 67791  | 2459053 |
| Sample_SPC20.mb.59              | 36.80 | Clostridiales   | 84947  | 2867527 |
| Sample_SPC20.mb.69              | 28.90 | Clostridiales   | 42662  | 2316615 |
| Sample_SPC20.mb.18              | 43.80 | Bacteroidales   | 186505 | 2963172 |
| Sample_SPC20.mb.30              | 46.50 | Bacteroidales   | 56910  | 3066119 |
| Sample_SPC20.mb.61              | 40.60 | Lachnospiraceae | 65643  | 3135693 |
| Sample_SPC20.Cluster9809cbin.1  | 44.90 | Bacteroidales   | 9061   | 4118522 |
| Sample_SPC20.mb.65              | 41.90 | Bacteroidales   | 51662  | 4769728 |
| Sample_SPC21.mb.16cbin.1        | 46.80 | Bacteria        | 94409  | 3737780 |
| Sample_SPC21.Cluster3681        | 50.10 | Bacteria        | 77162  | 2081787 |
| Sample_SPC21.Cluster5073        | 49.50 | Clostridiales   | 99611  | 1917625 |
| Sample_SPC21.mb.30              | 32.40 | Clostridiales   | 34250  | 2467950 |
| Sample_SPC21.mb.29              | 44.70 | Clostridiales   | 33776  | 2618748 |
| Sample_SPC21.mb.23cbin.1        | 61.80 | Clostridiales   | 29443  | 1752587 |
| Sample_SPC21.mb.39              | 43.20 | Clostridiales   | 53862  | 3026175 |
| Sample_SPC21.mb.10              | 41.40 | Lachnospiraceae | 82545  | 3160969 |
| Sample_SPC21.mb.35              | 54.40 | Clostridiales   | 20692  | 2711458 |
| Sample_SPC21.mb.33cbin.1        | 48.40 | Clostridiales   | 27716  | 2808478 |
| Sample_SPC21.mb.73cbin.1        | 35.20 | Bacteria        | 186701 | 2281032 |
| Sample_SPC21.mb.24cbin.1        | 53.20 | Clostridiales   | 101089 | 2979775 |
| Sample_SPC21.mb.84cbin.1        | 36.40 | Clostridiales   | 39041  | 1814155 |
| Sample_SPC21.mb.6               | 46.00 | Clostridiales   | 17891  | 2043488 |
| Sample_SPC21.mb.88              | 58.30 | Clostridiales   | 60563  | 2861469 |
| Sample_SPC21.mb.77              | 61.60 | Clostridiales   | 78974  | 1947810 |
| Sample_SPC21.Cluster9797cbin.1  | 40.20 | Clostridiales   | 129656 | 2311772 |
| Sample_SPC21.Cluster11874cbin.1 | 37.30 | Clostridiales   | 81973  | 2599088 |
| Sample_SPC21.mb.18              | 44.30 | Clostridiales   | 183843 | 2662366 |
| Sample_SPC21.mb.78cbin.1        | 45.10 | Clostridiales   | 35430  | 2524495 |
| Sample_SPC21.mb.62              | 56.60 | Clostridiales   | 14410  | 2354055 |
| Sample_SPC21.mb.70cbin.1        | 54.90 | Bacteroidetes   | 149034 | 2003354 |
| Sample_SPC21.mb.45cbin.1        | 42.90 | Lachnospiraceae | 36729  | 2364055 |
| Sample_SPC21.mb.8cbin.1         | 57.40 | Clostridiales   | 23969  | 2445612 |
| Sample_SPC21.Cluster7727        | 43.50 | Bacteroidales   | 133776 | 2633656 |
| Sample_SPC21.mb.72              | 41.30 | Clostridiales   | 145074 | 2508334 |
| Sample_SPC21.Cluster4981cbin.1  | 44.70 | Bacteroidales   | 65789  | 3128573 |
| Sample_SPC21.mb.91              | 59.30 | Bacteroidetes   | 185297 | 2884038 |
| Sample_SPC21.Cluster6746        | 43.30 | Bacteria        | 54857  | 3985791 |
| Sample_SPC21.mb.87cbin.1        | 59.00 | Bacteroidetes   | 98234  | 3038355 |
| Sample_SPC21.Cluster7572cbin.1  | 48.00 | Bacteroidales   | 107957 | 3923810 |
| Sample_SPC21.mb.60              | 40.30 | Bacteroidales   | 38706  | 3556489 |

|                                 |       |                     |        |         |
|---------------------------------|-------|---------------------|--------|---------|
| Sample_SPC21.mb.93              | 40.70 | Clostridiales       | 9227   | 2836600 |
| Sample_SPC21.Cluster6987cbin.1  | 45.00 | Bacteroidales       | 23847  | 4422272 |
| Sample_SPC21.Cluster6056        | 45.10 | Bacteroidales       | 97630  | 4468754 |
| Sample_SPC21.mb.98              | 26.80 | Clostridiales       | 41007  | 2835478 |
| Sample_SPC21.mb.1               | 41.80 | Bacteroidales       | 200826 | 4932183 |
| Sample_SPC22.Cluster17904       | 26.40 | Bacteria            | 126423 | 1157326 |
| Sample_SPC22.Cluster7620cbin.1  | 51.20 | Bacteria            | 115060 | 2215806 |
| Sample_SPC22.Cluster16607       | 36.80 | Clostridiales       | 135840 | 1313344 |
| Sample_SPC22.Cluster7396        | 50.90 | Bacteria            | 103486 | 1907425 |
| Sample_SPC22.mb.117             | 27.40 | Bacteria            | 116012 | 986406  |
| Sample_SPC22.Cluster481         | 60.60 | Actinobacteria      | 73239  | 1971926 |
| Sample_SPC22.Cluster8892cbin.1  | 49.40 | Clostridiales       | 108103 | 2003523 |
| Sample_SPC22.Cluster110cbin.1   | 60.40 | Clostridiales       | 22506  | 1785213 |
| Sample_SPC22.Cluster184         | 58.50 | Clostridiales       | 76000  | 2383507 |
| Sample_SPC22.mb.107             | 54.10 | Actinobacteria      | 143894 | 1653649 |
| Sample_SPC22.mb.21              | 46.20 | Bacteria            | 128481 | 3905754 |
| Sample_SPC22.Cluster9571cbin.1  | 48.00 | Clostridiales       | 102511 | 2722517 |
| Sample_SPC22.mb.41              | 26.70 | Bacteria            | 95679  | 1257497 |
| Sample_SPC22.Cluster15262       | 37.60 | Clostridiales       | 7860   | 2113768 |
| Sample_SPC22.mb.12              | 55.50 | Clostridiales       | 80712  | 2860698 |
| Sample_SPC22.Cluster17294       | 32.50 | Lactobacillales     | 109681 | 1834700 |
| Sample_SPC22.Cluster17647cbin.1 | 26.90 | Clostridiales       | 20964  | 2819151 |
| Sample_SPC22.Cluster1719cbin.1  | 57.80 | Bacteria            | 161495 | 3055854 |
| Sample_SPC22.mb.140cbin.1       | 57.20 | Clostridiales       | 76264  | 2697554 |
| Sample_SPC22.mb.130cbin.1       | 52.40 | Clostridiales       | 13285  | 2269993 |
| Sample_SPC22.mb.33              | 58.10 | Clostridiales       | 55498  | 3016645 |
| Sample_SPC22.mb.103             | 53.60 | Clostridiales       | 22323  | 2215333 |
| Sample_SPC22.mb.31              | 43.90 | Clostridiales       | 33515  | 2454535 |
| Sample_SPC22.mb.113             | 60.20 | Bifidobacteriaceae  | 76017  | 2174588 |
| Sample_SPC22.Cluster1939cbin.1  | 58.60 | Bifidobacteriaceae  | 137006 | 2555582 |
| Sample_SPC22.Cluster14493cbin.1 | 38.20 | Lactobacillales     | 12870  | 2545764 |
| Sample_SPC22.mb.46              | 62.20 | Clostridiales       | 9124   | 1486290 |
| Sample_SPC22.mb.78              | 52.90 | Clostridia          | 49630  | 2090446 |
| Sample_SPC22.mb.143cbin.1       | 40.50 | Clostridiales       | 112278 | 2172856 |
| Sample_SPC22.mb.16              | 41.30 | Clostridiales       | 199344 | 2611125 |
| Sample_SPC22.mb.62              | 58.40 | Clostridiales       | 8248   | 1903050 |
| Sample_SPC22.mb.38              | 60.30 | Bacteroidetes       | 69830  | 2497977 |
| Sample_SPC22.mb.60cbin.1        | 55.70 | Clostridiales       | 8565   | 2384860 |
| Sample_SPC22.mb.65cbin.1        | 36.50 | Clostridiales       | 44610  | 3634967 |
| Sample_SPC22.Cluster7098cbin.1  | 49.10 | Clostridiales       | 58173  | 6642387 |
| Sample_SPC22.mb.126             | 43.40 | Bacteroidales       | 124265 | 3218152 |
| Sample_SPC22.mb.54              | 54.80 | Bacteroidetes       | 104284 | 2359173 |
| Sample_SPC22.mb.39cbin.1        | 60.70 | Deltaproteobacteria | 7921   | 3357113 |
| Sample_SPC22.mb.30              | 58.60 | Bacteroidetes       | 162049 | 2658271 |
| Sample_SPC22.mb.98              | 61.80 | Clostridiales       | 48382  | 1935539 |
| Sample_SPC22.mb.43              | 46.90 | Lachnospiraceae     | 39413  | 7068934 |
| Sample_SPC22.mb.66              | 45.30 | Clostridiales       | 18476  | 2560268 |
| Sample_SPC22.mb.127             | 41.80 | Bacteroides         | 86699  | 4747709 |
| Sample_SPC22.mb.125cbin.1       | 50.50 | Enterobacteriaceae  | 44065  | 4591802 |
| Sample_SPC22.mb.45cbin.1        | 45.40 | Bacteroidales       | 15793  | 3949308 |
| Sample_SPC22.mb.86cbin.1        | 37.60 | Lactobacillales     | 155045 | 2662997 |
| Sample_SPC22.mb.68cbin.1        | 46.30 | Bacteroidales       | 37785  | 3354208 |
| Sample_SPC22.mb.81              | 41.80 | Bacteroidales       | 60079  | 4278715 |
| Sample_SPC22.mb.87cbin.1        | 57.30 | Enterobacteriaceae  | 121810 | 5423636 |
| Sample_SPC25.Cluster24cbin.1    | 61.60 | Clostridiales       | 19931  | 2101099 |
| Sample_SPC25.Cluster19206cbin.1 | 33.50 | Bacteria            | 25892  | 2289360 |
| Sample_SPC25.mb.5               | 60.60 | Bacteria            | 32888  | 2549599 |
| Sample_SPC25.Cluster5384cbin.1  | 51.90 | Clostridiales       | 95504  | 2112900 |



|                                 |       |                     |        |         |
|---------------------------------|-------|---------------------|--------|---------|
| Sample_SPC25.Cluster3917        | 51.30 | Bacteroidales       | 44364  | 2353996 |
| Sample_SPC25.mb.10              | 62.50 | Clostridiales       | 81009  | 1583900 |
| Sample_SPC25.Cluster14599cbin.1 | 38.60 | Clostridiales       | 75497  | 2085782 |
| Sample_SPC25.Cluster2875        | 54.40 | Prevotella          | 57418  | 2421909 |
| Sample_SPC25.Cluster13107cbin.1 | 41.90 | Clostridiales       | 175692 | 2440210 |
| Sample_SPC25.Cluster6801        | 47.20 | Selenomonadales     | 60517  | 2183845 |
| Sample_SPC25.Cluster11604cbin.1 | 44.30 | Clostridiales       | 182633 | 2816857 |
| Sample_SPC25.mb.27              | 56.30 | Clostridiales       | 15675  | 2189426 |
| Sample_SPC25.mb.67              | 26.00 | Bacteria            | 130107 | 1250005 |
| Sample_SPC25.Cluster33          | 63.60 | Deltaproteobacteria | 59876  | 2639707 |
| Sample_SPC25.Cluster4444cbin.1  | 50.40 | Bacteroidales       | 97801  | 2285152 |
| Sample_SPC25.mb.107cbin.1       | 53.90 | Clostridiales       | 7573   | 1837890 |
| Sample_SPC25.mb.23cbin.1        | 44.50 | Bacteroidales       | 26701  | 2583734 |
| Sample_SPC25.Cluster17392cbin.1 | 37.40 | Clostridiales       | 39972  | 2689681 |
| Sample_SPC25.mb.118             | 56.70 | Clostridiales       | 6874   | 2219716 |
| Sample_SPC25.Cluster13379cbin.1 | 41.00 | Lachnospiraceae     | 67670  | 3096755 |
| Sample_SPC25.mb.117             | 57.10 | Proteobacteria      | 36776  | 1906956 |
| Sample_SPC25.mb.110cbin.1       | 51.30 | Clostridiales       | 115553 | 2244530 |
| Sample_SPC25.mb.102cbin.1       | 43.60 | Clostridiales       | 140162 | 2109773 |
| Sample_SPC25.mb.56              | 41.10 | Clostridiales       | 33637  | 3192492 |
| Sample_SPC25.mb.103cbin.1       | 44.40 | Clostridiales       | 92382  | 2390445 |
| Sample_SPC25.mb.66              | 60.10 | Clostridiales       | 16371  | 2092976 |
| Sample_SPC25.Cluster12091cbin.1 | 42.20 | Bacteria            | 13471  | 3454118 |
| Sample_SPC25.mb.47              | 46.10 | Bacteroidetes       | 176765 | 2484168 |
| Sample_SPC25.mb.59              | 58.10 | Bacteroidetes       | 160485 | 2327723 |
| Sample_SPC25.mb.87              | 61.70 | Clostridiales       | 28680  | 1853296 |
| Sample_SPC25.mb.82cbin.1        | 51.00 | Clostridiales       | 25944  | 2355191 |
| Sample_SPC25.mb.98              | 49.10 | Lachnospiraceae     | 9927   | 2488571 |
| Sample_SPC25.mb.85              | 46.90 | Lachnospiraceae     | 45848  | 2634459 |
| Sample_SPC25.mb.92cbin.1        | 33.20 | Bacteria            | 10079  | 2562112 |
| Sample_SPC25.mb.14cbin.1        | 45.20 | Bacteroidales       | 10633  | 3979116 |
| Sample_SPC25.mb.4cbin.1         | 57.50 | Enterobacteriaceae  | 218800 | 5206090 |
| Sample_SPC26.Cluster285cbin.1   | 61.50 | Clostridiales       | 50150  | 1800910 |
| Sample_SPC26.mb.126             | 52.70 | Clostridiales       | 9749   | 1817738 |
| Sample_SPC26.mb.12              | 32.90 | Bacteria            | 73704  | 1840356 |
| Sample_SPC26.Cluster664cbin.1   | 56.80 | Clostridiales       | 90764  | 1889319 |
| Sample_SPC26.Cluster5521        | 49.80 | Clostridiales       | 116697 | 2076227 |
| Sample_SPC26.mb.114             | 59.00 | Clostridiales       | 57843  | 2007486 |
| Sample_SPC26.Cluster4938cbin.1  | 48.70 | Firmicutes          | 28464  | 1653031 |
| Sample_SPC26.mb.21              | 58.40 | Clostridiales       | 40122  | 2878521 |
| Sample_SPC26.mb.105             | 50.00 | Clostridiales       | 9792   | 1528545 |
| Sample_SPC26.Cluster4153cbin.1  | 53.70 | Clostridiales       | 149267 | 1880578 |
| Sample_SPC26.Cluster446cbin.1   | 59.60 | Bacteroidetes       | 119135 | 2209870 |
| Sample_SPC26.Cluster8877        | 44.20 | Clostridiales       | 185555 | 1922683 |
| Sample_SPC26.Cluster522cbin.1   | 60.50 | Bifidobacteriaceae  | 83839  | 1756699 |
| Sample_SPC26.Cluster3107        | 54.30 | Selenomonadales     | 84740  | 2219270 |
| Sample_SPC26.Cluster20cbin.1    | 62.80 | Proteobacteria      | 29344  | 2307573 |
| Sample_SPC26.mb.41              | 47.10 | Clostridiales       | 48933  | 1999198 |
| Sample_SPC26.mb.118cbin.1       | 38.80 | Clostridiales       | 72508  | 2024988 |
| Sample_SPC26.mb.38              | 58.70 | Clostridiales       | 6839   | 1705174 |
| Sample_SPC26.mb.128             | 55.00 | Bacteroidetes       | 121540 | 2694129 |
| Sample_SPC26.mb.24cbin.1        | 49.40 | Bacteroidales       | 81464  | 2660185 |
| Sample_SPC26.Cluster8628        | 41.80 | Lachnospiraceae     | 61785  | 2368516 |
| Sample_SPC26.mb.29              | 58.20 | Bacteroidetes       | 241320 | 2597586 |
| Sample_SPC26.mb.20cbin.1        | 44.20 | Clostridiales       | 150700 | 2726340 |
| Sample_SPC26.mb.48              | 56.40 | Clostridiales       | 62498  | 2203828 |
| Sample_SPC26.mb.28cbin.1        | 51.50 | Clostridiales       | 173750 | 2229543 |
| Sample_SPC26.Cluster2762cbin.1  | 48.90 | Bacteroidales       | 11604  | 3297824 |

|                                |       |                    |        |         |
|--------------------------------|-------|--------------------|--------|---------|
| Sample_SPC26.mb.109cbin.1      | 43.10 | Bacteria           | 10860  | 3885597 |
| Sample_SPC26.mb.15             | 43.30 | Bacteroidales      | 175906 | 3021238 |
| Sample_SPC26.Cluster7097       | 45.30 | Bacteroidales      | 29641  | 4036502 |
| Sample_SPC26.mb.71cbin.1       | 61.40 | Clostridiales      | 41472  | 2606467 |
| Sample_SPC26.mb.35             | 58.70 | Bacteroidetes      | 136598 | 2763276 |
| Sample_SPC26.mb.51             | 43.40 | Clostridiales      | 11784  | 2130027 |
| Sample_SPC26.mb.16cbin.1       | 46.00 | Bacteroidales      | 18220  | 3701510 |
| Sample_SPC26.mb.62cbin.1       | 46.10 | Prevotella         | 48674  | 3247279 |
| Sample_SPC26.mb.82             | 46.30 | Prevotella         | 41611  | 2524400 |
| Sample_SPC26.mb.53cbin.1       | 59.70 | Bacteroidetes      | 10639  | 2816976 |
| Sample_SPC26.mb.6cbin.1        | 40.80 | Lachnospiraceae    | 96663  | 3336585 |
| Sample_SPC26.mb.34             | 45.10 | Bacteroidales      | 69684  | 4451219 |
| Sample_SPC26.mb.50             | 43.50 | Bacteroidales      | 129444 | 4481147 |
| Sample_SPC27.Cluster3329cbin.1 | 49.50 | Clostridiales      | 102160 | 2062437 |
| Sample_SPC27.Cluster9815       | 28.50 | Bacteria           | 63515  | 1535571 |
| Sample_SPC27.Cluster546        | 58.30 | Clostridiales      | 65797  | 2803432 |
| Sample_SPC27.Cluster858cbin.1  | 55.10 | Clostridia         | 32620  | 2503385 |
| Sample_SPC27.Cluster6911       | 41.70 | Clostridiales      | 132554 | 2793540 |
| Sample_SPC27.Cluster228cbin.1  | 59.80 | Clostridiales      | 82682  | 2065906 |
| Sample_SPC27.Cluster4231       | 46.10 | Clostridiales      | 116390 | 2084465 |
| Sample_SPC27.Cluster103cbin.1  | 61.80 | Clostridiales      | 44637  | 2462544 |
| Sample_SPC27.mb.52             | 60.10 | Bacteria           | 98440  | 2296104 |
| Sample_SPC27.Cluster120cbin.1  | 60.10 | Bacteria           | 35543  | 2379255 |
| Sample_SPC27.Cluster5420cbin.1 | 43.60 | Clostridiales      | 117224 | 1900378 |
| Sample_SPC27.mb.107cbin.1      | 46.80 | Lactobacillales    | 60969  | 2013544 |
| Sample_SPC27.Cluster3062cbin.1 | 50.80 | Clostridiales      | 315336 | 2359110 |
| Sample_SPC27.mb.117            | 41.00 | Clostridiales      | 40881  | 3409231 |
| Sample_SPC27.mb.109cbin.1      | 57.40 | Clostridiales      | 59138  | 2873643 |
| Sample_SPC27.Cluster2068cbin.1 | 52.80 | Clostridiales      | 152553 | 2323111 |
| Sample_SPC27.Cluster7512       | 38.40 | Clostridiales      | 92717  | 2061388 |
| Sample_SPC27.Cluster5238cbin.1 | 44.10 | Clostridiales      | 34862  | 3191310 |
| Sample_SPC27.Cluster323cbin.1  | 60.40 | Bifidobacteriaceae | 111109 | 1928460 |
| Sample_SPC27.mb.100cbin.1      | 60.50 | Clostridiales      | 52686  | 2225947 |
| Sample_SPC27.mb.20cbin.1       | 36.70 | Clostridiales      | 11452  | 3284711 |
| Sample_SPC27.Cluster66cbin.1   | 60.30 | Bifidobacteriaceae | 131495 | 2381615 |
| Sample_SPC27.mb.121cbin.1      | 48.60 | Firmicutes         | 33807  | 1849267 |
| Sample_SPC27.mb.37             | 44.80 | Clostridiales      | 59052  | 2437689 |
| Sample_SPC27.Cluster1521cbin.1 | 58.60 | Bacteroidetes      | 177411 | 3010921 |
| Sample_SPC27.Cluster9403cbin.1 | 36.80 | Clostridiales      | 13272  | 2980284 |
| Sample_SPC27.mb.41             | 41.00 | Lachnospiraceae    | 110628 | 2466216 |
| Sample_SPC27.mb.120            | 43.50 | Clostridiales      | 8358   | 2959404 |
| Sample_SPC27.mb.54cbin.1       | 52.30 | Clostridiales      | 48400  | 2728209 |
| Sample_SPC27.mb.79cbin.1       | 48.00 | Clostridiales      | 58615  | 2975785 |
| Sample_SPC27.mb.28             | 43.60 | Lachnospiraceae    | 104659 | 2862911 |
| Sample_SPC27.mb.71             | 54.80 | Bacteroidetes      | 180843 | 1896845 |
| Sample_SPC27.mb.1cbin.1        | 49.20 | Proteobacteria     | 48021  | 2065330 |
| Sample_SPC27.Cluster3474       | 44.60 | Bacteroidales      | 84356  | 3609652 |
| Sample_SPC27.mb.30             | 58.90 | Bacteroidetes      | 124707 | 2755075 |
| Sample_SPC27.Cluster3889cbin.1 | 45.10 | Bacteroidales      | 82714  | 4471266 |
| Sample_SPC27.mb.93             | 49.00 | Clostridiales      | 67428  | 2674281 |
| Sample_SPC27.mb.81             | 61.90 | Clostridiales      | 61111  | 2842981 |
| Sample_SPC27.mb.85             | 40.00 | Streptococcus      | 40652  | 1978587 |
| Sample_SPC27.mb.123            | 46.70 | Bacteroidales      | 172786 | 3969826 |
| Sample_SPC27.mb.90             | 35.60 | Clostridiales      | 84198  | 2925512 |
| Sample_SPC27.mb.69cbin.1       | 42.00 | Bacteroidales      | 87552  | 5011204 |
| Sample_SPC28.Cluster11270      | 27.10 | Bacteria           | 118041 | 1411319 |
| Sample_SPC28.mb.2              | 28.10 | Bacteria           | 27371  | 976352  |
| Sample_SPC28.Cluster11306      | 27.10 | Clostridiales      | 120950 | 1759372 |

|                                |       |                    |        |         |
|--------------------------------|-------|--------------------|--------|---------|
| Sample_SPC28.Cluster483cbin.1  | 58.00 | Clostridiales      | 57123  | 3050072 |
| Sample_SPC28.mb.20             | 34.30 | Clostridiales      | 79030  | 2227408 |
| Sample_SPC28.Cluster10398      | 33.50 | Bacteria           | 46515  | 2229282 |
| Sample_SPC28.mb.22             | 57.30 | Clostridiales      | 13939  | 2238011 |
| Sample_SPC28.Cluster3456cbin.1 | 48.40 | Firmicutes         | 32264  | 1876376 |
| Sample_SPC28.Cluster3153cbin.1 | 49.40 | Bacteroidales      | 142363 | 2780746 |
| Sample_SPC28.Cluster8cbin.1    | 60.40 | Bacteroidetes      | 6302   | 2239627 |
| Sample_SPC28.Cluster753cbin.1  | 54.30 | Clostridiales      | 19624  | 1702707 |
| Sample_SPC28.Cluster5150       | 44.20 | Clostridiales      | 238218 | 1885466 |
| Sample_SPC28.Cluster9cbin.1    | 60.30 | Bifidobacteriaceae | 7850   | 1825217 |
| Sample_SPC28.Cluster5697cbin.1 | 44.30 | Clostridiales      | 159113 | 2552759 |
| Sample_SPC28.Cluster6428       | 44.10 | Clostridiales      | 109858 | 2737212 |
| Sample_SPC28.mb.24             | 41.20 | Clostridiales      | 114167 | 2604788 |
| Sample_SPC28.Cluster4642cbin.1 | 43.60 | Bacteroidales      | 6264   | 2312258 |
| Sample_SPC28.Cluster965        | 56.20 | Bifidobacteriaceae | 134229 | 2133424 |
| Sample_SPC28.Cluster8548cbin.1 | 37.40 | Clostridiales      | 20267  | 2601809 |
| Sample_SPC28.mb.72cbin.1       | 46.70 | Clostridiales      | 102272 | 2688118 |
| Sample_SPC28.mb.92             | 44.30 | Clostridiales      | 137179 | 3302646 |
| Sample_SPC28.mb.67             | 60.50 | Bacteroidetes      | 27576  | 2377599 |
| Sample_SPC28.mb.33             | 26.70 | Clostridiales      | 41885  | 2568532 |
| Sample_SPC28.mb.40             | 50.30 | Lachnospiraceae    | 17253  | 2549281 |
| Sample_SPC28.mb.9cbin.1        | 48.80 | Clostridiales      | 12278  | 2530372 |
| Sample_SPC28.mb.13             | 48.40 | Proteobacteria     | 57383  | 2573341 |
| Sample_SPC28.mb.62cbin.1       | 35.90 | Clostridiales      | 231014 | 2658124 |
| Sample_SPC28.Cluster5040cbin.1 | 43.20 | Bacteria           | 11808  | 3744151 |
| Sample_SPC28.mb.77             | 41.50 | Lachnospiraceae    | 68054  | 2853747 |
| Sample_SPC28.mb.7cbin.1        | 43.40 | Lachnospiraceae    | 79423  | 3032423 |
| Sample_SPC28.mb.89cbin.1       | 40.50 | Clostridiales      | 53167  | 2929585 |
| Sample_SPC28.mb.43cbin.1       | 47.00 | Bacteroidales      | 27274  | 3509814 |
| Sample_SPC30.Cluster7389cbin.1 | 37.40 | Clostridiales      | 6018   | 1970352 |
| Sample_SPC30.Cluster1051       | 56.40 | Clostridiales      | 111782 | 2218386 |
| Sample_SPC30.Cluster3246       | 47.60 | Clostridiales      | 135415 | 3060166 |
| Sample_SPC30.mb.31             | 62.80 | Clostridiales      | 8300   | 1712425 |
| Sample_SPC30.Cluster236cbin.1  | 59.80 | Actinobacteria     | 94250  | 2245600 |
| Sample_SPC30.mb.108cbin.1      | 34.20 | Bacilli            | 23555  | 2787307 |
| Sample_SPC30.mb.100cbin.1      | 50.40 | Clostridiales      | 25786  | 2546667 |
| Sample_SPC30.mb.35             | 56.90 | Clostridiales      | 36817  | 2429148 |
| Sample_SPC30.Cluster4993cbin.1 | 44.20 | Clostridiales      | 14324  | 2995269 |
| Sample_SPC30.mb.24cbin.1       | 58.70 | Clostridiales      | 21947  | 2307308 |
| Sample_SPC30.Cluster7999cbin.1 | 37.90 | Clostridiales      | 133865 | 2078088 |
| Sample_SPC30.Cluster5293cbin.1 | 42.60 | Clostridiales      | 74600  | 2698675 |
| Sample_SPC30.mb.1              | 34.60 | Lactobacillus      | 118341 | 1877988 |
| Sample_SPC30.mb.43cbin.1       | 60.50 | Clostridiales      | 44227  | 2383740 |
| Sample_SPC30.Cluster7400cbin.1 | 37.60 | Clostridiales      | 8841   | 2358307 |
| Sample_SPC30.Cluster5295cbin.1 | 45.20 | Prevotella         | 57580  | 3242125 |
| Sample_SPC30.mb.48             | 39.90 | Clostridiales      | 31294  | 2279916 |
| Sample_SPC30.Cluster9176cbin.1 | 32.70 | Lactobacillales    | 128322 | 2022573 |
| Sample_SPC30.Cluster5217cbin.1 | 42.90 | Lachnospiraceae    | 124235 | 3270227 |
| Sample_SPC30.mb.87             | 42.00 | Bacteria           | 67402  | 4461309 |
| Sample_SPC30.mb.13             | 37.40 | Lactobacillales    | 101377 | 1706604 |
| Sample_SPC30.mb.73             | 58.40 | Clostridiales      | 62576  | 2884028 |
| Sample_SPC30.Cluster8831cbin.1 | 40.90 | Lachnospiraceae    | 59230  | 3003543 |
| Sample_SPC30.mb.11cbin.1       | 36.00 | Clostridiales      | 179187 | 2585864 |
| Sample_SPC30.mb.41             | 56.40 | Clostridiales      | 14362  | 2446016 |
| Sample_SPC30.Cluster3797cbin.1 | 42.90 | Lachnospiraceae    | 8427   | 3212786 |
| Sample_SPC30.mb.78             | 41.30 | Clostridiales      | 26035  | 2872544 |
| Sample_SPC30.mb.62             | 51.00 | Lactobacillales    | 8298   | 1552879 |
| Sample_SPC30.mb.34             | 58.60 | Bifidobacteriaceae | 191128 | 2499626 |

|                                |       |                    |        |         |
|--------------------------------|-------|--------------------|--------|---------|
| Sample_SPC30.mb.99             | 47.30 | Lactobacillales    | 11556  | 1680569 |
| Sample_SPC30.Cluster6113cbin.1 | 47.60 | Clostridiales      | 129291 | 6963900 |
| Sample_SPC30.mb.85             | 54.90 | Bacteroidetes      | 141023 | 1939375 |
| Sample_SPC30.Cluster3074       | 45.30 | Bacteroidales      | 56811  | 4023637 |
| Sample_SPC30.mb.71cbin.1       | 51.40 | Clostridiales      | 26466  | 2099018 |
| Sample_SPC30.mb.56cbin.1       | 44.90 | Clostridiales      | 20821  | 2850275 |
| Sample_SPC30.mb.82             | 39.00 | Clostridiales      | 88333  | 2138750 |
| Sample_SPC30.mb.75             | 44.00 | Clostridiales      | 222689 | 2760629 |
| Sample_SPC30.mb.52             | 44.20 | Bacteria           | 7781   | 3476682 |
| Sample_SPC30.mb.68cbin.1       | 31.20 | Firmicutes         | 48279  | 2241399 |
| Sample_SPC30.mb.80cbin.1       | 40.50 | Bacteroidales      | 57029  | 3226343 |
| Sample_SPC30.mb.74cbin.1       | 64.20 | Actinobacteria     | 21068  | 3274243 |
| Sample_SPC31.Cluster13517      | 24.10 | Bacteria           | 37347  | 941253  |
| Sample_SPC31.mb.19             | 26.60 | Bacteria           | 70965  | 1353499 |
| Sample_SPC31.Cluster5528cbin.1 | 49.40 | Clostridiales      | 86265  | 1957922 |
| Sample_SPC31.Cluster4761cbin.1 | 49.70 | Clostridiales      | 81034  | 2015830 |
| Sample_SPC31.Cluster7149       | 45.20 | Clostridiales      | 87705  | 1706105 |
| Sample_SPC31.mb.49             | 25.90 | Bacteria           | 36330  | 1193699 |
| Sample_SPC31.Cluster557cbin.1  | 57.80 | Clostridiales      | 19010  | 1690924 |
| Sample_SPC31.Cluster7073cbin.1 | 45.30 | Clostridiales      | 6901   | 2066378 |
| Sample_SPC31.Cluster23cbin.1   | 61.50 | Bacteria           | 7829   | 4099330 |
| Sample_SPC31.mb.36             | 61.90 | Clostridiales      | 13459  | 1592080 |
| Sample_SPC31.mb.64cbin.1       | 53.40 | Clostridia         | 55760  | 1875273 |
| Sample_SPC31.mb.43cbin.1       | 56.80 | Clostridiales      | 27323  | 2465976 |
| Sample_SPC31.Cluster1          | 59.60 | Actinobacteria     | 129532 | 2220875 |
| Sample_SPC31.mb.80cbin.1       | 43.00 | Bacteria           | 14515  | 2481169 |
| Sample_SPC31.mb.33             | 62.00 | Clostridiales      | 23763  | 2267452 |
| Sample_SPC31.Cluster851cbin.1  | 57.60 | Clostridiales      | 41145  | 3044665 |
| Sample_SPC31.mb.5              | 62.20 | Clostridiales      | 10841  | 1640485 |
| Sample_SPC31.mb.76             | 27.70 | Clostridiales      | 80207  | 1480211 |
| Sample_SPC31.Cluster9043cbin.1 | 43.60 | Clostridiales      | 148048 | 2033068 |
| Sample_SPC31.Cluster3927       | 53.00 | Clostridiales      | 170394 | 2219996 |
| Sample_SPC31.Cluster456        | 60.40 | Bifidobacteriaceae | 62302  | 1903772 |
| Sample_SPC31.mb.100cbin.1      | 51.00 | Clostridiales      | 175567 | 2233156 |
| Sample_SPC31.mb.35cbin.1       | 45.10 | Clostridiales      | 7269   | 2113737 |
| Sample_SPC31.mb.60cbin.1       | 60.40 | Clostridiales      | 28748  | 1847013 |
| Sample_SPC31.mb.18cbin.1       | 44.40 | Clostridiales      | 141744 | 2397269 |
| Sample_SPC31.mb.65             | 58.00 | Clostridiales      | 56930  | 2328943 |
| Sample_SPC31.mb.42             | 40.90 | Clostridiales      | 31489  | 2587013 |
| Sample_SPC31.mb.58             | 55.20 | Bacteroidetes      | 21486  | 1846453 |
| Sample_SPC31.mb.83             | 59.70 | Clostridiales      | 122937 | 2273257 |
| Sample_SPC31.mb.39             | 41.30 | Lachnospiraceae    | 90284  | 2783813 |
| Sample_SPC31.mb.9              | 61.60 | Clostridiales      | 52753  | 1868684 |
| Sample_SPC31.mb.103            | 43.50 | Bacteroidales      | 288270 | 3118869 |
| Sample_SPC31.Cluster9271cbin.1 | 41.80 | Clostridiales      | 6843   | 3162510 |
| Sample_SPC31.mb.90             | 59.80 | Bacteroidetes      | 63233  | 2508071 |
| Sample_SPC31.mb.104            | 46.70 | Bacteroidales      | 117888 | 4505166 |
| Sample_SPC31.mb.12cbin.1       | 44.50 | Bacteroidales      | 44936  | 4928245 |
| Sample_SPC31.Cluster6989cbin.1 | 43.80 | Bacteroidales      | 27724  | 5553525 |
| Sample_SPC31.mb.68cbin.1       | 28.00 | Clostridiales      | 142601 | 3480005 |
| Sample_SPC31.Cluster446        | 58.00 | Enterobacteriaceae | 77550  | 4841033 |
| Sample_SPC32.mb.18cbin.1       | 47.00 | Bacteria           | 62037  | 1811368 |
| Sample_SPC32.Cluster5908       | 33.90 | Clostridiales      | 9489   | 1721186 |
| Sample_SPC32.mb.23             | 38.30 | Clostridiales      | 104957 | 2079869 |
| Sample_SPC32.mb.51             | 38.20 | Clostridiales      | 105284 | 2057190 |
| Sample_SPC32.Cluster3302cbin.1 | 48.70 | Clostridiales      | 21418  | 2304439 |
| Sample_SPC32.mb.48cbin.1       | 42.20 | Clostridiales      | 79160  | 2511651 |
| Sample_SPC32.Cluster784        | 52.20 | Clostridiales      | 103824 | 2255060 |

|                                 |       |                    |        |         |
|---------------------------------|-------|--------------------|--------|---------|
| Sample_SPC32.Cluster14          | 61.30 | Clostridiales      | 69766  | 2608665 |
| Sample_SPC32.mb.3cbin.1         | 42.80 | Clostridiales      | 79983  | 3356855 |
| Sample_SPC32.Cluster4295        | 41.00 | Lachnospiraceae    | 139934 | 2582132 |
| Sample_SPC32.mb.33cbin.1        | 47.70 | Clostridiales      | 108725 | 3073540 |
| Sample_SPC32.mb.68cbin.1        | 37.20 | Clostridiales      | 12460  | 2509748 |
| Sample_SPC32.mb.9cbin.1         | 58.40 | Clostridiales      | 12540  | 2983215 |
| Sample_SPC32.Cluster38          | 60.70 | Bifidobacteriaceae | 11051  | 1718494 |
| Sample_SPC32.Cluster5660cbin.1  | 40.40 | Clostridiales      | 162791 | 2181677 |
| Sample_SPC32.mb.34cbin.1        | 54.20 | Bacteroidetes      | 105785 | 2253201 |
| Sample_SPC32.Cluster329         | 57.30 | Proteobacteria     | 109781 | 2347806 |
| Sample_SPC32.Cluster2799cbin.1  | 43.10 | Lachnospiraceae    | 25944  | 2193279 |
| Sample_SPC32.Cluster6603cbin.1  | 27.10 | Clostridiales      | 24033  | 2966667 |
| Sample_SPC32.Cluster5317cbin.1  | 37.10 | Clostridiales      | 134346 | 3017214 |
| Sample_SPC32.mb.72cbin.1        | 60.00 | Bacteroidetes      | 181781 | 2428865 |
| Sample_SPC32.mb.75              | 44.20 | Clostridiales      | 245598 | 2710934 |
| Sample_SPC32.mb.35cbin.1        | 42.70 | Lachnospiraceae    | 96430  | 3513492 |
| Sample_SPC32.Cluster1330cbin.1  | 45.30 | Bacteroidales      | 30881  | 4077875 |
| Sample_SPC32.Cluster2341        | 45.00 | Bacteroidales      | 262926 | 4513953 |
| Sample_SPC32.mb.43cbin.1        | 46.50 | Bacteroidales      | 163380 | 4155000 |
| Sample_SPC32.mb.16cbin.1        | 42.90 | Bacteroides        | 88615  | 5301577 |
| Sample_SPC32.mb.55cbin.1        | 41.40 | Bacteroidales      | 20143  | 5042501 |
| Sample_SPC34.Cluster218cbin.1   | 54.00 | Clostridia         | 15752  | 1752650 |
| Sample_SPC34.Cluster6412cbin.1  | 49.50 | Clostridiales      | 109590 | 1977458 |
| Sample_SPC34.Cluster13592       | 32.70 | Bacteria           | 152040 | 1907826 |
| Sample_SPC34.mb.16              | 28.30 | Bacteria           | 118489 | 3036596 |
| Sample_SPC34.Cluster180         | 62.20 | Clostridiales      | 33736  | 1433334 |
| Sample_SPC34.Cluster784cbin.1   | 56.80 | Clostridiales      | 102807 | 2363632 |
| Sample_SPC34.mb.43              | 26.00 | Bacteria           | 88724  | 1240704 |
| Sample_SPC34.mb.24cbin.1        | 58.10 | Clostridiales      | 40481  | 3062761 |
| Sample_SPC34.Cluster6988cbin.1  | 45.90 | Clostridiales      | 13516  | 1889741 |
| Sample_SPC34.mb.39              | 38.00 | Clostridiales      | 299762 | 1709573 |
| Sample_SPC34.Cluster3041        | 54.90 | Bacteroidetes      | 146976 | 1968187 |
| Sample_SPC34.mb.32              | 53.70 | Clostridiales      | 17951  | 1811652 |
| Sample_SPC34.Cluster11066cbin.1 | 40.80 | Clostridiales      | 130155 | 2086852 |
| Sample_SPC34.mb.102             | 60.10 | Actinobacteria     | 67982  | 2074196 |
| Sample_SPC34.Cluster2616        | 55.50 | Bacteria           | 120135 | 2768717 |
| Sample_SPC34.Cluster400         | 60.40 | Bifidobacteriaceae | 60357  | 1899635 |
| Sample_SPC34.mb.84cbin.1        | 53.10 | Clostridia         | 66695  | 2037349 |
| Sample_SPC34.mb.28              | 58.50 | Bacteroidetes      | 19438  | 2514318 |
| Sample_SPC34.Cluster10388cbin.1 | 42.50 | Clostridiales      | 115798 | 2982058 |
| Sample_SPC34.mb.30              | 52.40 | Firmicutes         | 28010  | 2118561 |
| Sample_SPC34.mb.36              | 54.10 | Clostridiales      | 46644  | 1706377 |
| Sample_SPC34.Cluster8564cbin.1  | 43.70 | Lachnospiraceae    | 66133  | 2749211 |
| Sample_SPC34.mb.21cbin.1        | 59.70 | Clostridiales      | 37298  | 1726279 |
| Sample_SPC34.mb.26cbin.1        | 45.20 | Clostridiales      | 29124  | 2676798 |
| Sample_SPC34.mb.61cbin.1        | 58.70 | Clostridiales      | 45926  | 2504228 |
| Sample_SPC34.mb.68              | 55.90 | Clostridiales      | 28346  | 3092589 |
| Sample_SPC34.mb.65              | 52.90 | Clostridiales      | 24971  | 2697634 |
| Sample_SPC34.mb.78cbin.1        | 63.20 | Actinobacteria     | 184147 | 2616697 |
| Sample_SPC34.mb.76              | 59.20 | Bacteroidetes      | 60053  | 2803686 |
| Sample_SPC34.mb.87              | 55.00 | Bacteroidetes      | 172834 | 2704810 |
| Sample_SPC34.mb.74cbin.1        | 41.20 | Lachnospiraceae    | 93965  | 3004850 |
| Sample_SPC34.mb.29              | 46.10 | Bacteroidales      | 127865 | 3417263 |
| Sample_SPC34.mb.75              | 43.40 | Bacteroidales      | 6352   | 2622203 |
| Sample_SPC34.mb.95cbin.1        | 58.80 | Bacteroidetes      | 30168  | 3135363 |
| Sample_SPC34.Cluster6455cbin.1  | 57.90 | Enterobacteriaceae | 8677   | 4370492 |
| Sample_SPC34.mb.57              | 41.70 | Bacteroides        | 69328  | 5038548 |
| Sample_SPC35.Cluster4392cbin.1  | 50.50 | Bacteria           | 82685  | 1960156 |

|                                 |       |                     |        |         |
|---------------------------------|-------|---------------------|--------|---------|
| Sample_SPC35.Cluster13613       | 27.70 | Clostridiales       | 104905 | 1420925 |
| Sample_SPC35.Cluster4020cbin.1  | 52.80 | Clostridia          | 74520  | 2163851 |
| Sample_SPC35.Cluster6132        | 49.40 | Clostridiales       | 102517 | 1910393 |
| Sample_SPC35.mb.109cbin.1       | 28.40 | Bacteria            | 115425 | 1295659 |
| Sample_SPC35.Cluster12386cbin.1 | 37.50 | Clostridiales       | 161824 | 2133789 |
| Sample_SPC35.Cluster8829        | 37.00 | Clostridiales       | 117233 | 2581965 |
| Sample_SPC35.mb.113cbin.1       | 50.80 | Clostridiales       | 74919  | 1692104 |
| Sample_SPC35.Cluster548cbin.1   | 60.60 | Clostridiales       | 27121  | 1815312 |
| Sample_SPC35.Cluster9504        | 41.80 | Clostridiales       | 68258  | 2240052 |
| Sample_SPC35.Cluster12742cbin.1 | 33.40 | Bacteria            | 13076  | 2165388 |
| Sample_SPC35.Cluster8080cbin.1  | 44.90 | Clostridiales       | 88449  | 2616195 |
| Sample_SPC35.Cluster6587        | 46.20 | Lachnospiraceae     | 37731  | 2556718 |
| Sample_SPC35.mb.29              | 60.10 | Clostridiales       | 16097  | 2197508 |
| Sample_SPC35.mb.31              | 27.50 | Euryarchaeota       | 83759  | 1717914 |
| Sample_SPC35.Cluster6966cbin.1  | 44.50 | Clostridiales       | 6293   | 1914666 |
| Sample_SPC35.mb.77cbin.1        | 53.90 | Clostridia          | 14461  | 1663157 |
| Sample_SPC35.mb.10              | 60.00 | Actinobacteria      | 31619  | 2049513 |
| Sample_SPC35.mb.64              | 59.30 | Clostridiales       | 14202  | 2170238 |
| Sample_SPC35.Cluster4cbin.1     | 64.00 | Deltaproteobacteria | 11600  | 2379110 |
| Sample_SPC35.mb.80              | 28.10 | Clostridiales       | 95650  | 1351070 |
| Sample_SPC35.mb.92              | 25.20 | Bacteria            | 69716  | 1214906 |
| Sample_SPC35.mb.74              | 27.20 | Clostridiales       | 200023 | 1866688 |
| Sample_SPC35.mb.41cbin.1        | 56.90 | Clostridiales       | 105509 | 1992371 |
| Sample_SPC35.mb.48cbin.1        | 48.30 | Clostridiales       | 22335  | 2897615 |
| Sample_SPC35.mb.63              | 59.20 | Clostridiales       | 31033  | 1826691 |
| Sample_SPC35.mb.13cbin.1        | 58.10 | Proteobacteria      | 14962  | 2026548 |
| Sample_SPC35.mb.73cbin.1        | 43.50 | Clostridiales       | 22415  | 2919187 |
| Sample_SPC35.Cluster1269        | 58.50 | Bacteroidetes       | 163087 | 3056577 |
| Sample_SPC35.mb.112cbin.1       | 60.40 | Bifidobacteriaceae  | 82128  | 1808795 |
| Sample_SPC35.mb.4cbin.1         | 45.70 | Lachnospiraceae     | 193910 | 2668061 |
| Sample_SPC35.mb.101cbin.1       | 35.90 | Clostridiales       | 188392 | 2561049 |
| Sample_SPC35.mb.71              | 49.10 | Bacteria            | 201111 | 2483976 |
| Sample_SPC35.mb.102             | 28.70 | Clostridiales       | 69031  | 2587326 |
| Sample_SPC35.mb.38cbin.1        | 54.40 | Proteobacteria      | 65508  | 2285298 |
| Sample_SPC35.mb.65cbin.1        | 53.70 | Prevotella          | 66175  | 2587439 |
| Sample_SPC35.Cluster7717        | 43.10 | Bacteria            | 39346  | 4030866 |
| Sample_SPC35.mb.43cbin.1        | 56.70 | Clostridiales       | 14570  | 2677683 |
| Sample_SPC35.Cluster8961cbin.1  | 42.80 | Lachnospiraceae     | 45535  | 3035015 |
| Sample_SPC35.mb.9               | 40.90 | Clostridiales       | 28289  | 2556346 |
| Sample_SPC35.mb.46cbin.1        | 43.60 | Bacteroidales       | 79027  | 2911073 |
| Sample_SPC35.mb.88              | 30.90 | Euryarchaeota       | 112665 | 1818800 |
| Sample_SPC35.mb.115             | 44.00 | Bacteria            | 77520  | 4000623 |
| Sample_SPC35.Cluster1343        | 57.50 | Enterobacteriaceae  | 258053 | 5144333 |
| Sample_SPC36.Cluster3901cbin.1  | 49.50 | Clostridiales       | 86083  | 2021885 |
| Sample_SPC36.Cluster9499        | 34.30 | Clostridiales       | 7324   | 1912864 |
| Sample_SPC36.mb.61              | 53.50 | Clostridia          | 44585  | 1900474 |
| Sample_SPC36.mb.4               | 58.50 | Clostridiales       | 6823   | 2582721 |
| Sample_SPC36.Cluster635cbin.1   | 55.80 | Clostridiales       | 8860   | 2032257 |
| Sample_SPC36.Cluster303         | 59.20 | Clostridiales       | 49037  | 1747842 |
| Sample_SPC36.Cluster790cbin.1   | 59.00 | Clostridiales       | 60023  | 2038785 |
| Sample_SPC36.Cluster1804        | 53.80 | Clostridiales       | 29992  | 2124375 |
| Sample_SPC36.mb.63cbin.1        | 45.10 | Clostridiales       | 6748   | 2065847 |
| Sample_SPC36.mb.75              | 62.80 | Clostridiales       | 22936  | 1948887 |
| Sample_SPC36.Cluster5498cbin.1  | 47.20 | Selenomonadales     | 18273  | 2174893 |
| Sample_SPC36.mb.35              | 60.70 | Clostridiales       | 19207  | 2323473 |
| Sample_SPC36.Cluster8252        | 40.70 | Clostridiales       | 174402 | 2102920 |
| Sample_SPC36.Cluster3019        | 52.80 | Clostridiales       | 156599 | 2267718 |
| Sample_SPC36.mb.62cbin.1        | 49.30 | Bacteroidales       | 72947  | 2765499 |

|                                |       |                     |        |         |
|--------------------------------|-------|---------------------|--------|---------|
| Sample_SPC36.Cluster1077cbin.1 | 59.60 | Bifidobacteriaceae  | 146740 | 1907587 |
| Sample_SPC36.Cluster7181       | 44.00 | Clostridiales       | 118115 | 2799095 |
| Sample_SPC36.mb.20             | 41.20 | Clostridiales       | 178804 | 2566803 |
| Sample_SPC36.Cluster9568       | 36.30 | Clostridiales       | 196759 | 2794081 |
| Sample_SPC36.mb.58             | 42.80 | Lachnospiraceae     | 38652  | 2428849 |
| Sample_SPC36.mb.60cbin.1       | 45.10 | Prevotella          | 67982  | 3429443 |
| Sample_SPC36.mb.71             | 43.40 | Lachnospiraceae     | 209162 | 3173658 |
| Sample_SPC36.mb.87cbin.1       | 31.30 | Firmicutes          | 75834  | 2379101 |
| Sample_SPC36.mb.80cbin.1       | 56.10 | Enterobacteriaceae  | 91577  | 4295282 |
| Sample_SPC37.Cluster13187      | 26.30 | Bacteria            | 77031  | 1091092 |
| Sample_SPC37.Cluster13221      | 25.10 | Bacteria            | 117840 | 1264274 |
| Sample_SPC37.Cluster13116      | 29.40 | Bacteria            | 87031  | 1495530 |
| Sample_SPC37.Cluster4582cbin.1 | 53.10 | Clostridia          | 93503  | 2022385 |
| Sample_SPC37.mb.1cbin.1        | 53.80 | Clostridia          | 8479   | 1545586 |
| Sample_SPC37.Cluster7281       | 45.30 | Clostridiales       | 118210 | 1663561 |
| Sample_SPC37.Cluster100cbin.1  | 62.20 | Clostridiales       | 7481   | 1493339 |
| Sample_SPC37.mb.39cbin.1       | 48.90 | Clostridia          | 8893   | 2319839 |
| Sample_SPC37.mb.42cbin.1       | 49.40 | Clostridiales       | 45013  | 2149138 |
| Sample_SPC37.Cluster450cbin.1  | 58.60 | Clostridiales       | 6285   | 2028811 |
| Sample_SPC37.mb.10             | 56.80 | Clostridiales       | 23657  | 2395573 |
| Sample_SPC37.mb.31             | 56.90 | Clostridiales       | 19992  | 2471910 |
| Sample_SPC37.mb.34             | 56.50 | Clostridiales       | 19633  | 2198410 |
| Sample_SPC37.Cluster4758       | 52.80 | Clostridiales       | 146604 | 2252818 |
| Sample_SPC37.mb.20             | 47.10 | Clostridiales       | 12929  | 2012118 |
| Sample_SPC37.mb.38             | 58.90 | Bacteroidetes       | 13071  | 2450302 |
| Sample_SPC37.Cluster9270cbin.1 | 44.40 | Clostridiales       | 141121 | 2241191 |
| Sample_SPC37.mb.21             | 59.60 | Clostridiales       | 46609  | 2290700 |
| Sample_SPC37.mb.57cbin.1       | 48.00 | Clostridiales       | 48805  | 3147231 |
| Sample_SPC37.Cluster9106       | 43.90 | Clostridiales       | 302061 | 2851437 |
| Sample_SPC37.mb.93             | 49.50 | Clostridiales       | 73382  | 1912231 |
| Sample_SPC37.mb.68cbin.1       | 56.90 | Clostridiales       | 28275  | 1858873 |
| Sample_SPC37.Cluster2120cbin.1 | 53.90 | Bacteroidales       | 60942  | 2544425 |
| Sample_SPC37.Cluster7965cbin.1 | 42.00 | Lachnospiraceae     | 6289   | 2018575 |
| Sample_SPC37.mb.61             | 54.50 | Clostridiales       | 8252   | 1542645 |
| Sample_SPC37.mb.60cbin.1       | 41.10 | Clostridiales       | 13562  | 1901779 |
| Sample_SPC37.mb.67             | 59.90 | Actinobacteria      | 27839  | 2065007 |
| Sample_SPC37.mb.64             | 61.00 | Clostridiales       | 8092   | 2146292 |
| Sample_SPC37.mb.59             | 54.60 | Bacteroidetes       | 95461  | 2298327 |
| Sample_SPC37.Cluster9006cbin.1 | 42.50 | Bacteroidales       | 11597  | 3757062 |
| Sample_SPC37.mb.91cbin.1       | 48.60 | Firmicutes          | 34576  | 1855257 |
| Sample_SPC37.mb.44             | 46.40 | Bacteroidales       | 93450  | 3303088 |
| Sample_SPC37.mb.78             | 59.20 | Bacteroidetes       | 73128  | 2901956 |
| Sample_SPC37.mb.71             | 60.20 | Deltaproteobacteria | 12014  | 3912210 |
| Sample_SPC37.mb.15cbin.1       | 45.50 | Bacteroidales       | 11463  | 4152139 |
| Sample_SPC37.mb.25             | 41.60 | Bacteroidales       | 48938  | 4489710 |
| Sample_SPC37.mb.9cbin.1        | 40.70 | Lachnospiraceae     | 73076  | 3229347 |
| Sample_SPC37.mb.8              | 43.50 | Bacteroidales       | 80178  | 3141908 |
| Sample_SPC37.mb.72             | 46.80 | Bacteroidales       | 69619  | 4153587 |
| Sample_SPC37.mb.16cbin.1       | 50.80 | Enterobacteriaceae  | 25656  | 4823998 |
| Sample_SPC37.mb.63cbin.1       | 41.40 | Bacteroides         | 92301  | 4976639 |
| Sample_SPC38.Cluster9960cbin.1 | 36.90 | Clostridiales       | 15160  | 2612124 |
| Sample_SPC38.Cluster169        | 59.60 | Clostridiales       | 63590  | 1855362 |
| Sample_SPC38.mb.34             | 36.30 | Clostridiales       | 161885 | 2523913 |
| Sample_SPC38.mb.95             | 26.90 | Bacteria            | 37022  | 1288354 |
| Sample_SPC38.mb.23             | 60.30 | Clostridiales       | 28226  | 1958608 |
| Sample_SPC38.mb.29             | 59.10 | Clostridiales       | 25736  | 1976863 |
| Sample_SPC38.mb.38cbin.1       | 56.90 | Clostridiales       | 11048  | 2167687 |
| Sample_SPC38.mb.36             | 61.70 | Clostridiales       | 18247  | 1908162 |

|                                 |       |                    |        |         |
|---------------------------------|-------|--------------------|--------|---------|
| Sample_SPC38.mb.81cbin.1        | 58.00 | Clostridiales      | 51925  | 3119267 |
| Sample_SPC38.Cluster3558        | 49.70 | Clostridiales      | 174728 | 1804005 |
| Sample_SPC38.Cluster8932        | 39.50 | Clostridiales      | 97101  | 2047414 |
| Sample_SPC38.mb.30              | 60.70 | Clostridiales      | 16494  | 2287184 |
| Sample_SPC38.mb.82              | 41.20 | Clostridiales      | 49942  | 3285993 |
| Sample_SPC38.mb.47              | 60.40 | Bacteroidetes      | 133634 | 2249957 |
| Sample_SPC38.Cluster128cbin.1   | 55.60 | Bacteria           | 37755  | 2861461 |
| Sample_SPC38.mb.50              | 37.70 | Clostridiales      | 151955 | 2045011 |
| Sample_SPC38.mb.78              | 54.90 | Bacteroidetes      | 47643  | 1882205 |
| Sample_SPC38.mb.63              | 43.50 | Selenomonadales    | 132582 | 2370304 |
| Sample_SPC38.Cluster5767cbin.1  | 45.00 | Clostridiales      | 42794  | 2870941 |
| Sample_SPC38.mb.12              | 41.20 | Lachnospiraceae    | 125704 | 2652517 |
| Sample_SPC38.mb.51              | 43.90 | Clostridiales      | 244952 | 2876545 |
| Sample_SPC38.mb.43              | 29.20 | Bacteria           | 13163  | 2987950 |
| Sample_SPC38.mb.39              | 49.30 | Proteobacteria     | 29581  | 2149693 |
| Sample_SPC38.mb.16              | 41.70 | Lachnospiraceae    | 75991  | 2467270 |
| Sample_SPC38.mb.11cbin.1        | 31.30 | Firmicutes         | 51588  | 2381503 |
| Sample_SPC38.mb.99cbin.1        | 54.10 | Prevotella         | 67172  | 2593498 |
| Sample_SPC38.mb.69              | 43.50 | Bacteroidales      | 259527 | 2930534 |
| Sample_SPC38.mb.9               | 43.00 | Clostridiales      | 96582  | 2674577 |
| Sample_SPC38.mb.68cbin.1        | 44.20 | Bacteroidales      | 22679  | 3566984 |
| Sample_SPC38.mb.17              | 41.80 | Bacteroidales      | 37152  | 4474744 |
| Sample_SPC38.mb.65cbin.1        | 42.20 | Bacteroides        | 103913 | 4132451 |
| Sample_SPC38.mb.42              | 46.30 | Bacteroidales      | 121017 | 4438328 |
| Sample_SPC38.mb.89              | 45.50 | Bacteroidales      | 89407  | 3964836 |
| Sample_SPC39.mb.28cbin.1        | 46.50 | Bacteria           | 121997 | 3935013 |
| Sample_SPC39.mb.54              | 62.10 | Bacteria           | 14191  | 2238942 |
| Sample_SPC39.Cluster11745cbin.1 | 34.10 | Clostridiales      | 21917  | 2431654 |
| Sample_SPC39.mb.37cbin.1        | 38.20 | Clostridiales      | 26908  | 2524479 |
| Sample_SPC39.Cluster7153cbin.1  | 47.30 | Clostridiales      | 120075 | 3220885 |
| Sample_SPC39.Cluster776cbin.1   | 57.30 | Bacteria           | 61434  | 2456407 |
| Sample_SPC39.mb.15              | 52.00 | Clostridiales      | 21562  | 1953666 |
| Sample_SPC39.mb.11cbin.1        | 46.90 | Lactobacillales    | 77604  | 1978928 |
| Sample_SPC39.Cluster5880cbin.1  | 48.50 | Firmicutes         | 32107  | 2000862 |
| Sample_SPC39.Cluster1686cbin.1  | 54.20 | Bacteroidetes      | 68993  | 2230974 |
| Sample_SPC39.mb.61cbin.1        | 61.80 | Clostridiales      | 12664  | 1710165 |
| Sample_SPC39.mb.52              | 60.80 | Clostridiales      | 74365  | 2221598 |
| Sample_SPC39.mb.33              | 60.10 | Actinobacteria     | 10446  | 1945052 |
| Sample_SPC39.Cluster5759        | 44.20 | Clostridiales      | 269153 | 2028129 |
| Sample_SPC39.mb.71cbin.1        | 57.50 | Clostridiales      | 48556  | 3301563 |
| Sample_SPC39.mb.63cbin.1        | 62.00 | Clostridiales      | 61410  | 1928501 |
| Sample_SPC39.mb.102cbin.1       | 57.60 | Clostridiales      | 61439  | 3251777 |
| Sample_SPC39.Cluster256         | 60.50 | Bifidobacteriaceae | 55315  | 1899247 |
| Sample_SPC39.mb.27              | 37.70 | Clostridiales      | 35510  | 2756257 |
| Sample_SPC39.mb.56cbin.1        | 33.30 | Bacteria           | 40406  | 2269195 |
| Sample_SPC39.Cluster11623cbin.1 | 32.60 | Lactobacillales    | 89704  | 1998146 |
| Sample_SPC39.mb.21              | 38.50 | Clostridiales      | 90712  | 2126440 |
| Sample_SPC39.mb.5cbin.1         | 60.40 | Clostridiales      | 18286  | 2372118 |
| Sample_SPC39.Cluster9674cbin.1  | 37.40 | Clostridiales      | 71154  | 2762775 |
| Sample_SPC39.Cluster2073        | 53.20 | Selenomonadales    | 102090 | 2274532 |
| Sample_SPC39.mb.78cbin.1        | 49.60 | Clostridiales      | 18163  | 2227172 |
| Sample_SPC39.Cluster9455cbin.1  | 41.00 | Lachnospiraceae    | 93786  | 3101943 |
| Sample_SPC39.mb.74              | 43.20 | Clostridiales      | 146268 | 2461867 |
| Sample_SPC39.mb.104             | 41.70 | Clostridiales      | 12769  | 3186751 |
| Sample_SPC39.mb.79cbin.1        | 38.60 | Streptococcus      | 94696  | 1858989 |
| Sample_SPC39.Cluster5123        | 45.20 | Bacteroidales      | 83918  | 3986562 |
| Sample_SPC39.mb.97              | 44.80 | Clostridiales      | 86391  | 3009864 |
| Sample_SPC41.Cluster13347       | 24.30 | Bacteria           | 61161  | 972204  |



|                                 |       |                    |        |         |
|---------------------------------|-------|--------------------|--------|---------|
| Sample_SPC41.Cluster13293cbin.1 | 25.50 | Bacteria           | 77162  | 1343783 |
| Sample_SPC41.mb.18cbin.1        | 49.70 | Clostridia         | 9675   | 1252752 |
| Sample_SPC41.Cluster6548        | 47.20 | Clostridiales      | 232002 | 1526132 |
| Sample_SPC41.mb.23              | 42.80 | Clostridia         | 25408  | 1310247 |
| Sample_SPC41.mb.101cbin.1       | 53.70 | Clostridiales      | 9681   | 1909077 |
| Sample_SPC41.mb.20cbin.1        | 57.20 | Clostridia         | 52912  | 2765391 |
| Sample_SPC41.mb.1               | 58.10 | Clostridiales      | 44760  | 2992540 |
| Sample_SPC41.mb.102             | 37.50 | Clostridiales      | 168780 | 2008737 |
| Sample_SPC41.mb.5               | 53.40 | Clostridia         | 40436  | 1830987 |
| Sample_SPC41.mb.11              | 58.20 | Clostridiales      | 30662  | 2522795 |
| Sample_SPC41.mb.40              | 47.90 | Clostridiales      | 126920 | 1783192 |
| Sample_SPC41.mb.33              | 49.50 | Clostridiales      | 75718  | 2124292 |
| Sample_SPC41.mb.16cbin.1        | 33.30 | Clostridiales      | 151286 | 2772130 |
| Sample_SPC41.mb.69              | 47.20 | Clostridia         | 26498  | 1971882 |
| Sample_SPC41.mb.26              | 57.30 | Clostridiales      | 56640  | 1947814 |
| Sample_SPC41.mb.68              | 57.70 | Clostridia         | 15272  | 3279527 |
| Sample_SPC41.mb.87              | 55.00 | Clostridia         | 181726 | 2450607 |
| Sample_SPC41.Cluster12539       | 31.10 | Euryarchaeota      | 10552  | 1537061 |
| Sample_SPC41.mb.83              | 60.40 | Clostridiales      | 77024  | 1867490 |
| Sample_SPC41.mb.100             | 40.90 | Clostridiales      | 14498  | 1854885 |
| Sample_SPC41.mb.44              | 55.60 | Bacteroidetes      | 8429   | 1769977 |
| Sample_SPC41.mb.28              | 41.80 | Clostridiales      | 38083  | 2892358 |
| Sample_SPC41.Cluster8115        | 44.60 | Clostridiales      | 141569 | 2258805 |
| Sample_SPC41.mb.91              | 38.40 | Clostridiales      | 22846  | 4066021 |
| Sample_SPC41.mb.95cbin.1        | 59.60 | Clostridiales      | 23992  | 2742663 |
| Sample_SPC41.mb.80cbin.1        | 52.40 | Firmicutes         | 50752  | 2229045 |
| Sample_SPC41.mb.94              | 53.50 | Clostridiales      | 14641  | 2020492 |
| Sample_SPC41.mb.85              | 44.20 | Clostridiales      | 135627 | 2666217 |
| Sample_SPC41.mb.98cbin.1        | 51.00 | Clostridiales      | 46523  | 2265717 |
| Sample_SPC41.mb.99cbin.1        | 41.50 | Bacteroidales      | 26684  | 5052750 |
| Sample_SPC42.Cluster17162cbin.1 | 24.80 | Bacteria           | 39140  | 1301426 |
| Sample_SPC42.mb.101cbin.1       | 49.90 | Clostridia         | 111248 | 1896417 |
| Sample_SPC42.Cluster10367cbin.1 | 43.80 | Clostridiales      | 131663 | 3057102 |
| Sample_SPC42.mb.114             | 55.40 | Clostridiales      | 27542  | 2273344 |
| Sample_SPC42.Cluster7237        | 46.10 | Clostridiales      | 126468 | 2198912 |
| Sample_SPC42.Cluster76cbin.1    | 58.30 | Clostridiales      | 114418 | 2462059 |
| Sample_SPC42.mb.45              | 59.40 | Clostridiales      | 7165   | 1750843 |
| Sample_SPC42.mb.29cbin.1        | 41.80 | Lachnospiraceae    | 106598 | 2262379 |
| Sample_SPC42.mb.41              | 61.50 | Clostridiales      | 139217 | 1973185 |
| Sample_SPC42.Cluster7381        | 45.00 | Lachnospiraceae    | 77989  | 2488385 |
| Sample_SPC42.mb.67              | 52.00 | Clostridiales      | 9473   | 1841812 |
| Sample_SPC42.mb.68              | 38.70 | Clostridiales      | 104881 | 2745765 |
| Sample_SPC42.mb.112             | 62.90 | Proteobacteria     | 6730   | 1747491 |
| Sample_SPC42.Cluster8949cbin.1  | 43.60 | Clostridiales      | 324771 | 2799350 |
| Sample_SPC42.Cluster13963cbin.1 | 32.70 | Lactobacillales    | 28082  | 2046530 |
| Sample_SPC42.Cluster1138cbin.1  | 58.60 | Bifidobacteriaceae | 143711 | 2385353 |
| Sample_SPC42.Cluster10175       | 41.30 | Lachnospiraceae    | 89422  | 2923365 |
| Sample_SPC42.mb.77              | 42.40 | Clostridiales      | 19610  | 2471826 |
| Sample_SPC42.mb.110             | 36.30 | Clostridiales      | 12297  | 2209610 |
| Sample_SPC42.mb.25              | 41.90 | Clostridiales      | 88302  | 2375581 |
| Sample_SPC42.mb.56              | 51.20 | Bacteroidales      | 55091  | 2464091 |
| Sample_SPC42.mb.115cbin.1       | 39.70 | Clostridiales      | 17529  | 2263096 |
| Sample_SPC42.mb.73cbin.1        | 61.40 | Clostridiales      | 53876  | 1936443 |
| Sample_SPC42.mb.62cbin.1        | 48.10 | Bacteroidales      | 51760  | 2620930 |
| Sample_SPC42.mb.54              | 63.50 | Actinobacteria     | 42737  | 2556727 |
| Sample_SPC42.mb.7cbin.1         | 47.50 | Bacteroidales      | 24341  | 2438682 |
| Sample_SPC42.mb.60cbin.1        | 45.00 | Clostridiales      | 27597  | 2303408 |
| Sample_SPC42.mb.28              | 49.40 | Lachnospiraceae    | 67597  | 3034403 |

|                                 |       |                    |        |         |
|---------------------------------|-------|--------------------|--------|---------|
| Sample_SPC42.mb.83cbin.1        | 54.30 | Bacteroidetes      | 149731 | 2154714 |
| Sample_SPC42.mb.78cbin.1        | 43.90 | Lachnospiraceae    | 41014  | 2686630 |
| Sample_SPC42.mb.81              | 29.20 | Bacteria           | 43540  | 2658868 |
| Sample_SPC45.Cluster1174cbin.1  | 57.20 | Bacteria           | 63512  | 2038549 |
| Sample_SPC45.Cluster1324cbin.1  | 58.00 | Clostridiales      | 68016  | 3120709 |
| Sample_SPC45.mb.21cbin.1        | 29.10 | Bacteria           | 110032 | 1583542 |
| Sample_SPC45.mb.104             | 33.60 | Clostridiales      | 199157 | 1846969 |
| Sample_SPC45.mb.110             | 49.40 | Clostridiales      | 100142 | 1968331 |
| Sample_SPC45.mb.11              | 36.60 | Clostridiales      | 20606  | 1681820 |
| Sample_SPC45.mb.48cbin.1        | 53.70 | Clostridia         | 49205  | 1694179 |
| Sample_SPC45.Cluster13128cbin.1 | 37.40 | Clostridiales      | 30498  | 2107173 |
| Sample_SPC45.Cluster2583        | 54.80 | Bacteroidetes      | 125115 | 1997829 |
| Sample_SPC45.Cluster7266        | 46.70 | Selenomonadales    | 72421  | 2289221 |
| Sample_SPC45.mb.28cbin.1        | 57.10 | Clostridiales      | 92606  | 1921209 |
| Sample_SPC45.mb.46cbin.1        | 61.80 | Clostridiales      | 49926  | 1848481 |
| Sample_SPC45.mb.18              | 54.30 | Clostridiales      | 18268  | 1660773 |
| Sample_SPC45.Cluster4017cbin.1  | 50.80 | Bacteroidales      | 33936  | 2145975 |
| Sample_SPC45.mb.7               | 53.10 | Clostridia         | 54225  | 2024147 |
| Sample_SPC45.Cluster1974        | 55.40 | Bacteria           | 90493  | 2787234 |
| Sample_SPC45.mb.1               | 39.10 | Clostridiales      | 28161  | 2189755 |
| Sample_SPC45.mb.65              | 44.30 | Clostridiales      | 21051  | 2134391 |
| Sample_SPC45.mb.67              | 50.00 | Clostridiales      | 35351  | 2312379 |
| Sample_SPC45.mb.91              | 44.20 | Clostridia         | 21407  | 1961052 |
| Sample_SPC45.mb.25              | 36.10 | Clostridiales      | 31001  | 2394496 |
| Sample_SPC45.mb.22              | 43.80 | Lachnospiraceae    | 66382  | 2708104 |
| Sample_SPC45.mb.77              | 53.70 | Clostridiales      | 18250  | 1918846 |
| Sample_SPC45.mb.49              | 51.40 | Clostridiales      | 224379 | 2278805 |
| Sample_SPC45.Cluster11681cbin.1 | 43.00 | Bacteria           | 77179  | 4096766 |
| Sample_SPC45.mb.84              | 46.70 | Clostridiales      | 12775  | 2543679 |
| Sample_SPC45.mb.73cbin.1        | 38.00 | Clostridiales      | 75964  | 1858210 |
| Sample_SPC45.mb.2cbin.1         | 48.70 | Proteobacteria     | 20511  | 2468778 |
| Sample_SPC45.mb.64              | 40.60 | Clostridiales      | 192876 | 2129882 |
| Sample_SPC45.mb.56cbin.1        | 41.00 | Clostridiales      | 23609  | 2535666 |
| Sample_SPC45.mb.99cbin.1        | 47.80 | Clostridiales      | 111677 | 3114625 |
| Sample_SPC45.mb.87              | 59.30 | Clostridiales      | 60926  | 2300314 |
| Sample_SPC45.mb.89              | 47.00 | Lachnospiraceae    | 24129  | 3073036 |
| Sample_SPC45.Cluster6907cbin.1  | 46.40 | Bacteroidales      | 96819  | 4561818 |
| Sample_SPC45.mb.98              | 46.80 | Clostridiales      | 9491   | 1859295 |
| Sample_SPC45.mb.17              | 45.50 | Bacteroidales      | 104144 | 3881256 |
| Sample_SPC45.mb.88cbin.1        | 58.40 | Bacteroidetes      | 206071 | 3576339 |
| Sample_SPC45.mb.72cbin.1        | 45.10 | Bacteroidales      | 10474  | 4169422 |
| Sample_SPC45.Cluster911cbin.1   | 50.80 | Enterobacteriaceae | 44526  | 4616174 |
| Sample_SPC47.Cluster2599cbin.1  | 49.30 | Clostridiales      | 10327  | 1820366 |
| Sample_SPC47.Cluster3860cbin.1  | 48.00 | Clostridiales      | 13966  | 1872142 |
| Sample_SPC47.mb.11              | 34.30 | Clostridiales      | 14414  | 2154140 |
| Sample_SPC47.Cluster374cbin.1   | 57.90 | Clostridiales      | 49611  | 2926406 |
| Sample_SPC47.mb.31              | 61.00 | Clostridiales      | 69256  | 2196058 |
| Sample_SPC47.Cluster1897        | 53.80 | Clostridiales      | 202102 | 1837072 |
| Sample_SPC47.mb.10cbin.1        | 46.50 | Selenomonadales    | 9468   | 1585807 |
| Sample_SPC47.mb.5               | 61.90 | Actinobacteria     | 7411   | 1964921 |
| Sample_SPC47.mb.57cbin.1        | 48.10 | Clostridiales      | 25443  | 2742274 |
| Sample_SPC47.Cluster1045        | 55.50 | Proteobacteria     | 148886 | 2367055 |
| Sample_SPC47.mb.43              | 40.20 | Clostridiales      | 31294  | 3171301 |
| Sample_SPC47.mb.29cbin.1        | 38.90 | Clostridiales      | 77301  | 1895372 |
| Sample_SPC47.mb.101cbin.1       | 56.50 | Bifidobacteriaceae | 276407 | 2049818 |
| Sample_SPC47.mb.21              | 44.20 | Clostridiales      | 84206  | 2692371 |
| Sample_SPC47.mb.61              | 58.60 | Bacteroidetes      | 9342   | 2282157 |
| Sample_SPC47.Cluster11991cbin.1 | 31.10 | Firmicutes         | 87757  | 2066703 |

|                                |       |                    |        |         |
|--------------------------------|-------|--------------------|--------|---------|
| Sample_SPC47.mb.39cbin.1       | 60.10 | Bifidobacteriaceae | 24270  | 2247868 |
| Sample_SPC47.Cluster170cbin.1  | 59.00 | Bacteroidetes      | 19756  | 2669067 |
| Sample_SPC47.mb.73cbin.1       | 58.70 | Clostridiales      | 17594  | 2288036 |
| Sample_SPC47.Cluster9834cbin.1 | 41.10 | Lachnospiraceae    | 92829  | 3070413 |
| Sample_SPC47.mb.77cbin.1       | 54.30 | Bacteroidetes      | 80045  | 2039933 |
| Sample_SPC47.mb.52             | 42.10 | Clostridiales      | 10143  | 2384966 |
| Sample_SPC47.mb.96cbin.1       | 56.90 | Clostridiales      | 56112  | 2212957 |
| Sample_SPC47.Cluster3686cbin.1 | 46.70 | Bacteroidales      | 219727 | 3175786 |
| Sample_SPC47.mb.12             | 43.40 | Bacteroidales      | 81065  | 3036323 |
| Sample_SPC47.mb.25             | 46.70 | Bacteroidales      | 68001  | 3169370 |
| Sample_SPC47.Cluster6069cbin.1 | 43.30 | Bacteria           | 82085  | 4037013 |
| Sample_SPC47.mb.66             | 61.70 | Proteobacteria     | 46716  | 2373293 |
| Sample_SPC47.mb.18cbin.1       | 43.00 | Bacteria           | 8001   | 3809057 |
| Sample_SPC47.Cluster3793       | 45.20 | Bacteroidales      | 70829  | 4309533 |
| Sample_SPC47.mb.63             | 42.10 | Bacteroidales      | 63812  | 3562795 |
| Sample_SPC47.Cluster5874cbin.1 | 45.20 | Bacteroidales      | 20090  | 4356713 |
| Sample_SPC47.mb.84             | 62.10 | Clostridiales      | 15470  | 3375155 |
| Sample_SPC47.mb.76cbin.1       | 41.60 | Lachnospiraceae    | 67294  | 2531301 |
| Sample_SPC47.mb.74             | 50.90 | Enterobacteriaceae | 29997  | 4407132 |
| Sample_YPA1.mb.4cbin.1         | 45.40 | Selenomonadales    | 14554  | 1687998 |
| Sample_YPA1.mb.7               | 58.20 | Clostridiales      | 79325  | 2358071 |
| Sample_YPA1.Cluster3           | 60.10 | Bifidobacteriaceae | 56784  | 2141868 |
| Sample_YPA1.Cluster770cbin.1   | 38.50 | Selenomonadales    | 48583  | 2172466 |
| Sample_YPA1.mb.17              | 49.10 | Proteobacteria     | 34079  | 2096149 |
| Sample_YPA1.Cluster2cbin.1     | 61.50 | Clostridiales      | 33963  | 3611614 |
| Sample_YPA1.Cluster14cbin.1    | 57.70 | Clostridiales      | 52839  | 2885023 |
| Sample_YPA1.Cluster736cbin.1   | 42.80 | Lachnospiraceae    | 72529  | 3157188 |
| Sample_YPA1.Cluster346         | 46.30 | Bacteroidales      | 130327 | 3866823 |
| Sample_YPA1.mb.5               | 48.20 | Clostridiales      | 8946   | 4151092 |
| Sample_YPA1.Cluster642cbin.1   | 42.70 | Bacteroides        | 204710 | 5711805 |
| Sample_YPA2.Cluster7617        | 37.50 | Clostridiales      | 13742  | 1838092 |
| Sample_YPA2.Cluster111         | 59.30 | Clostridiales      | 8793   | 1877183 |
| Sample_YPA2.Cluster444cbin.1   | 59.00 | Clostridiales      | 43063  | 1936558 |
| Sample_YPA2.mb.21              | 33.20 | Clostridiales      | 46423  | 2557910 |
| Sample_YPA2.mb.71              | 26.00 | Bacteria           | 40239  | 1236524 |
| Sample_YPA2.Cluster967cbin.1   | 58.30 | Clostridiales      | 21281  | 1935974 |
| Sample_YPA2.mb.17cbin.1        | 48.70 | Clostridiales      | 23015  | 2529573 |
| Sample_YPA2.mb.22              | 61.90 | Clostridiales      | 8148   | 1918231 |
| Sample_YPA2.mb.31              | 51.30 | Clostridiales      | 22358  | 2275615 |
| Sample_YPA2.mb.69cbin.1        | 58.00 | Clostridiales      | 41577  | 3032722 |
| Sample_YPA2.mb.6               | 36.30 | Clostridiales      | 168562 | 2519624 |
| Sample_YPA2.mb.55              | 41.30 | Clostridiales      | 9129   | 3130879 |
| Sample_YPA2.mb.7               | 57.40 | Clostridiales      | 7572   | 1996521 |
| Sample_YPA2.Cluster964cbin.1   | 54.60 | Bacteroidetes      | 48576  | 2114830 |
| Sample_YPA2.Cluster10058       | 37.70 | Clostridiales      | 209030 | 2100509 |
| Sample_YPA2.Cluster9010cbin.1  | 40.60 | Clostridiales      | 357458 | 2043167 |
| Sample_YPA2.mb.61              | 44.80 | Clostridiales      | 32726  | 2566982 |
| Sample_YPA2.mb.26              | 60.30 | Clostridiales      | 58173  | 2461186 |
| Sample_YPA2.mb.23cbin.1        | 56.40 | Clostridiales      | 14821  | 2452117 |
| Sample_YPA2.mb.45cbin.1        | 44.00 | Selenomonadales    | 21023  | 2204637 |
| Sample_YPA2.Cluster755         | 54.40 | Bacteroidales      | 49223  | 2380938 |
| Sample_YPA2.Cluster6851cbin.1  | 43.20 | Clostridiales      | 129279 | 2480411 |
| Sample_YPA2.mb.15cbin.1        | 56.60 | Bifidobacteriaceae | 16089  | 1995304 |
| Sample_YPA2.Cluster7305        | 38.40 | Bacteroidales      | 7743   | 2407749 |
| Sample_YPA2.mb.5               | 44.90 | Lachnospiraceae    | 95872  | 2455203 |
| Sample_YPA2.Cluster8664cbin.1  | 37.30 | Clostridiales      | 103604 | 2833055 |
| Sample_YPA2.mb.18cbin.1        | 44.90 | Clostridiales      | 60952  | 2831355 |
| Sample_YPA2.mb.75              | 36.70 | Clostridiales      | 55138  | 2095797 |

|                               |       |                 |        |         |
|-------------------------------|-------|-----------------|--------|---------|
| Sample_YPA2.mb.72cbin.1       | 41.30 | Lachnospiraceae | 86349  | 2981780 |
| Sample_YPA2.mb.37             | 45.10 | Bacteroidales   | 149934 | 4660367 |
| Sample_YPA3.mb.22cbin.1       | 41.60 | Bacteria        | 67435  | 2542625 |
| Sample_YPA3.Cluster4908       | 43.80 | Clostridiales   | 83804  | 2758527 |
| Sample_YPA3.mb.55             | 38.00 | Clostridiales   | 7771   | 2894615 |
| Sample_YPA3.mb.40cbin.1       | 58.00 | Clostridiales   | 5006   | 1910935 |
| Sample_YPA3.mb.54cbin.1       | 54.50 | Actinobacteria  | 23934  | 1552449 |
| Sample_YPA3.mb.50             | 56.30 | Clostridiales   | 31982  | 2737611 |
| Sample_YPA3.mb.48cbin.1       | 60.80 | Clostridiales   | 108130 | 2277263 |
| Sample_YPA3.Cluster38cbin.1   | 58.50 | Clostridiales   | 95584  | 2345348 |
| Sample_YPA3.mb.61cbin.1       | 61.60 | Clostridiales   | 24463  | 2104943 |
| Sample_YPA3.Cluster4466       | 45.10 | Clostridiales   | 154765 | 1640887 |
| Sample_YPA3.Cluster2815cbin.1 | 46.00 | Bacteroidales   | 115361 | 3301209 |
| Sample_YPA3.mb.66cbin.1       | 57.60 | Clostridiales   | 46056  | 2733661 |
| Sample_YPA3.mb.4              | 38.10 | Clostridiales   | 209589 | 1849484 |
| Sample_YPA3.Cluster806cbin.1  | 55.20 | Bacteroidetes   | 85839  | 2647948 |
| Sample_YPA3.Cluster5432       | 40.80 | Clostridiales   | 182836 | 2153218 |
| Sample_YPA3.mb.5cbin.1        | 54.10 | Bacteroidetes   | 91395  | 2346228 |
| Sample_YPA3.mb.52cbin.1       | 51.30 | Clostridiales   | 134165 | 2196610 |
| Sample_YPA3.mb.19cbin.1       | 45.90 | Clostridiales   | 50928  | 2621196 |
| Sample_YPA3.Cluster1349       | 53.00 | Clostridiales   | 53645  | 2621366 |
| Sample_YPA3.mb.68             | 57.30 | Clostridiales   | 85742  | 2779013 |
| Sample_YPA3.mb.58             | 58.10 | Clostridiales   | 22163  | 2355482 |
| Sample_YPA3.mb.46             | 43.10 | Lachnospiraceae | 19952  | 3196648 |
| Sample_YPA3.Cluster4437cbin.1 | 46.40 | Bacteroidales   | 184702 | 4130127 |
| Sample_YPA3.Cluster3753       | 45.10 | Bacteroidales   | 170216 | 4724053 |
| Sample_YPA3.mb.7              | 41.80 | Bacteroides     | 99896  | 4474812 |
| Sample_YPA4.mb.11cbin.1       | 42.60 | Clostridiales   | 32715  | 2620200 |
| Sample_YPA4.Cluster5859       | 43.70 | Clostridiales   | 102075 | 2769630 |
| Sample_YPA4.mb.19             | 57.00 | Clostridiales   | 39304  | 2379728 |
| Sample_YPA4.mb.30cbin.1       | 54.60 | Actinobacteria  | 14275  | 1481790 |
| Sample_YPA4.Cluster452cbin.1  | 60.40 | Clostridiales   | 100134 | 1960256 |
| Sample_YPA4.mb.1              | 58.50 | Clostridiales   | 12597  | 1813807 |
| Sample_YPA4.Cluster139        | 61.60 | Clostridiales   | 54964  | 1974941 |
| Sample_YPA4.mb.22cbin.1       | 48.60 | Clostridiales   | 10334  | 2631577 |
| Sample_YPA4.mb.26             | 61.10 | Clostridiales   | 100612 | 2183007 |
| Sample_YPA4.Cluster45cbin.1   | 58.40 | Clostridiales   | 81645  | 2361444 |
| Sample_YPA4.mb.47             | 37.30 | Clostridiales   | 28952  | 3936673 |
| Sample_YPA4.Cluster5769cbin.1 | 47.80 | Firmicutes      | 37651  | 1408812 |
| Sample_YPA4.Cluster3321cbin.1 | 55.60 | Bacteroidetes   | 5877   | 2142569 |
| Sample_YPA4.Cluster7833       | 38.20 | Clostridiales   | 222540 | 1884159 |
| Sample_YPA4.Cluster3723cbin.1 | 45.50 | Bacteroidales   | 121144 | 3437045 |
| Sample_YPA4.Cluster7082       | 40.60 | Clostridiales   | 182836 | 2086502 |
| Sample_YPA4.mb.50             | 58.50 | Clostridiales   | 22090  | 2175704 |
| Sample_YPA4.mb.52             | 55.00 | Bacteroidetes   | 118107 | 1972884 |
| Sample_YPA4.mb.46cbin.1       | 34.70 | Lactobacillus   | 6469   | 1641634 |
| Sample_YPA4.mb.58             | 56.60 | Clostridiales   | 6812   | 2164695 |
| Sample_YPA4.mb.65cbin.1       | 57.70 | Clostridiales   | 54939  | 2885011 |
| Sample_YPA4.Cluster7499       | 37.40 | Clostridiales   | 59120  | 2748789 |
| Sample_YPA4.mb.70             | 51.50 | Clostridiales   | 108059 | 2047879 |
| Sample_YPA4.mb.43cbin.1       | 55.70 | Clostridiales   | 60544  | 3376711 |
| Sample_YPA4.mb.9cbin.1        | 46.10 | Clostridiales   | 46088  | 2611093 |
| Sample_YPA4.mb.63cbin.1       | 41.70 | Lachnospiraceae | 61928  | 2601218 |
| Sample_YPA4.mb.15cbin.1       | 46.40 | Bacteroidales   | 161622 | 4171730 |
| Sample_YPA4.mb.64cbin.1       | 45.00 | Bacteroidales   | 138215 | 4732895 |
| Sample_YPA5.Cluster28cbin.1   | 60.80 | Clostridiales   | 22447  | 1810843 |
| Sample_YPA5.Cluster1676cbin.1 | 50.90 | Bacteroidales   | 11890  | 2066121 |
| Sample_YPA5.mb.19cbin.1       | 59.40 | Clostridiales   | 41695  | 2345720 |

|                               |       |                     |        |         |
|-------------------------------|-------|---------------------|--------|---------|
| Sample_YPA5.mb.14             | 56.20 | Clostridiales       | 70673  | 2269613 |
| Sample_YPA5.mb.16             | 51.00 | Clostridiales       | 35452  | 2311337 |
| Sample_YPA5.Cluster7017       | 40.70 | Clostridiales       | 130461 | 1705605 |
| Sample_YPA5.mb.22cbin.1       | 45.20 | Clostridiales       | 103548 | 2681441 |
| Sample_YPA5.Cluster3216       | 46.90 | Proteobacteria      | 73892  | 1864301 |
| Sample_YPA5.Cluster1060       | 55.60 | Proteobacteria      | 195704 | 2236725 |
| Sample_YPA5.Cluster19         | 63.50 | Deltaproteobacteria | 58843  | 2648937 |
| Sample_YPA5.mb.52cbin.1       | 62.00 | Clostridiales       | 165101 | 2023352 |
| Sample_YPA5.mb.23             | 46.30 | Bacteroidetes       | 22086  | 2422220 |
| Sample_YPA5.mb.69             | 57.90 | Clostridiales       | 69707  | 2219654 |
| Sample_YPA5.Cluster577cbin.1  | 59.20 | Bacteroidetes       | 164558 | 2676305 |
| Sample_YPA5.mb.39             | 46.90 | Lachnospiraceae     | 41159  | 3204646 |
| Sample_YPA5.Cluster4724       | 41.70 | Lachnospiraceae     | 93555  | 2913603 |
| Sample_YPA5.mb.29             | 40.90 | Clostridiales       | 21323  | 2505377 |
| Sample_YPA5.mb.13cbin.1       | 50.20 | Bacteroidales       | 69951  | 2387937 |
| Sample_YPA5.mb.47cbin.1       | 51.00 | Firmicutes          | 42643  | 2358502 |
| Sample_YPA5.mb.8              | 41.00 | Lachnospiraceae     | 90252  | 2543097 |
| Sample_YPA5.mb.7              | 41.30 | Clostridiales       | 188379 | 2564571 |
| Sample_YPA5.mb.81             | 54.20 | Bacteroidetes       | 66960  | 2101061 |
| Sample_YPA5.Cluster1993cbin.1 | 48.50 | Bacteroidales       | 34548  | 3490628 |
| Sample_YPA5.mb.28             | 40.70 | Bacteroidales       | 47629  | 3018383 |
| Sample_YPA5.mb.43             | 41.90 | Lachnospiraceae     | 57872  | 2384421 |
| Sample_YPA5.mb.38cbin.1       | 55.60 | Clostridiales       | 25878  | 3426417 |
| Sample_YPA5.mb.68             | 49.50 | Lachnospiraceae     | 124773 | 2941354 |
| Sample_YPA5.mb.30cbin.1       | 44.10 | Bacteroidales       | 36558  | 3701538 |
| Sample_YPA5.mb.74cbin.1       | 37.00 | Clostridiales       | 20300  | 3117866 |
| Sample_YPA5.Cluster2191cbin.1 | 45.20 | Bacteroidales       | 41990  | 4401295 |
| Sample_YPA5.Cluster3451cbin.1 | 44.90 | Bacteroidales       | 138341 | 4789321 |
| Sample_YPA5.mb.40             | 46.70 | Bacteroidales       | 122612 | 3925641 |
| Sample_YPA6.Cluster5179cbin.1 | 48.60 | Clostridia          | 57740  | 2207385 |
| Sample_YPA6.mb.53             | 26.70 | Bacteria            | 97525  | 1306762 |
| Sample_YPA6.Cluster7899       | 45.30 | Clostridiales       | 157844 | 1741174 |
| Sample_YPA6.Cluster81cbin.1   | 61.70 | Clostridiales       | 29528  | 1582467 |
| Sample_YPA6.mb.10             | 59.30 | Clostridiales       | 29437  | 2255426 |
| Sample_YPA6.mb.42             | 36.20 | Clostridiales       | 119088 | 2873882 |
| Sample_YPA6.Cluster3578cbin.1 | 51.40 | Clostridiales       | 130101 | 2189032 |
| Sample_YPA6.mb.63             | 59.50 | Clostridiales       | 11426  | 1734408 |
| Sample_YPA6.mb.13             | 51.20 | Clostridiales       | 199319 | 2222057 |
| Sample_YPA6.mb.47             | 56.60 | Clostridiales       | 7956   | 2406082 |
| Sample_YPA6.mb.60             | 46.70 | Lachnospiraceae     | 69964  | 2888020 |
| Sample_YPA6.mb.43             | 44.60 | Clostridiales       | 20881  | 2102931 |
| Sample_YPA6.mb.28             | 41.00 | Lachnospiraceae     | 7921   | 2631564 |
| Sample_YPA6.Cluster1155       | 58.40 | Bacteroidetes       | 279190 | 3232278 |
| Sample_YPA6.mb.61             | 43.20 | Lachnospiraceae     | 104675 | 2916751 |
| Sample_YPA6.mb.27cbin.1       | 48.30 | Proteobacteria      | 9762   | 2453660 |
| Sample_YPA6.mb.12cbin.1       | 43.10 | Bacteria            | 52868  | 4097638 |
| Sample_YPA6.mb.34             | 46.70 | Bacteroidales       | 230535 | 4203522 |
| Sample_YPA6.mb.24             | 45.10 | Bacteroidales       | 150063 | 4620584 |
| Sample_YPA6.mb.58             | 41.90 | Bacteroides         | 64775  | 4703976 |
| Sample_YPA7.mb.29             | 24.90 | Bacteria            | 48149  | 1538709 |
| Sample_YPA7.mb.45             | 27.80 | Bacteria            | 17593  | 996772  |
| Sample_YPA7.mb.19             | 27.10 | Clostridiales       | 230245 | 1818628 |
| Sample_YPA7.mb.18             | 38.60 | Clostridiales       | 24221  | 2454689 |
| Sample_YPA7.mb.32cbin.1       | 52.10 | Clostridiales       | 20948  | 2348196 |
| Sample_YPA7.Cluster910cbin.1  | 50.00 | Bacteroidales       | 35574  | 2428480 |
| Sample_YPA7.Cluster251cbin.1  | 55.20 | Bacteroidetes       | 13115  | 2562545 |
| Sample_YPA7.mb.42             | 49.50 | Clostridiales       | 7001   | 2187806 |
| Sample_YPA7.mb.69             | 48.20 | Clostridiales       | 6754   | 1607463 |

|                               |       |                    |        |         |
|-------------------------------|-------|--------------------|--------|---------|
| Sample_YPA7.Cluster3867cbin.1 | 44.10 | Clostridiales      | 156519 | 2020786 |
| Sample_YPA7.Cluster3122       | 43.50 | Selenomonadales    | 285985 | 2419053 |
| Sample_YPA7.mb.16             | 56.70 | Clostridiales      | 13179  | 2365915 |
| Sample_YPA7.mb.24             | 41.20 | Clostridiales      | 47633  | 1943935 |
| Sample_YPA7.mb.31cbin.1       | 59.70 | Clostridiales      | 36077  | 2251483 |
| Sample_YPA7.Cluster628        | 55.40 | Bacteria           | 119094 | 2900186 |
| Sample_YPA7.mb.26cbin.1       | 46.20 | Clostridiales      | 47206  | 2379487 |
| Sample_YPA7.mb.35             | 43.30 | Lachnospiraceae    | 37293  | 2080585 |
| Sample_YPA7.mb.1              | 43.80 | Lachnospiraceae    | 112597 | 2617985 |
| Sample_YPA7.mb.60cbin.1       | 60.40 | Clostridiales      | 32859  | 3028282 |
| Sample_YPA7.Cluster176cbin.1  | 58.80 | Bacteroidetes      | 242731 | 3009176 |
| Sample_YPA7.mb.9              | 59.70 | Clostridiales      | 104081 | 2118706 |
| Sample_YPA7.Cluster2391cbin.1 | 44.40 | Bacteroidales      | 122773 | 3327453 |
| Sample_YPA7.mb.7              | 60.50 | Clostridiales      | 16725  | 2315512 |
| Sample_YPA7.mb.54             | 37.50 | Clostridiales      | 147031 | 2758510 |
| Sample_YPA7.mb.80             | 51.30 | Clostridiales      | 121128 | 2244710 |
| Sample_YPA7.mb.85             | 41.10 | Clostridiales      | 213749 | 2623949 |
| Sample_YPA7.mb.63cbin.1       | 44.80 | Prevotella         | 58511  | 3685937 |
| Sample_YPA7.mb.81             | 41.60 | Lachnospiraceae    | 74467  | 2681807 |
| Sample_YPA7.Cluster3591cbin.1 | 45.20 | Bacteroidales      | 100154 | 4326540 |
| Sample_YPA7.Cluster7303cbin.1 | 42.90 | Bacteria           | 11022  | 4594755 |
| Sample_YPA7.Cluster2095       | 44.90 | Bacteroidales      | 79955  | 4692852 |
| Sample_YPA7.mb.64             | 41.00 | Lachnospiraceae    | 24098  | 3853171 |
| Sample_YPA7.mb.76             | 42.30 | Bacteroidales      | 63608  | 3222367 |
| Sample_YPA7.mb.22cbin.1       | 41.60 | Bacteroidales      | 76712  | 4802492 |
| Sample_YPA7.mb.67             | 41.40 | Lachnospiraceae    | 50911  | 4150807 |
| Sample_YPA7.mb.62             | 46.50 | Bacteroidales      | 119232 | 4150367 |
| Sample_YPB1.Cluster1591       | 46.70 | Clostridiales      | 87871  | 1777021 |
| Sample_YPB1.mb.28cbin.1       | 59.60 | Clostridiales      | 101574 | 2050657 |
| Sample_YPB1.Cluster327cbin.1  | 58.40 | Clostridiales      | 133443 | 2157046 |
| Sample_YPB1.Cluster1720       | 46.80 | Lactobacillales    | 170385 | 2038631 |
| Sample_YPB1.Cluster198cbin.1  | 56.40 | Clostridiales      | 14032  | 2266106 |
| Sample_YPB1.Cluster782cbin.1  | 48.40 | Firmicutes         | 38366  | 1948463 |
| Sample_YPB1.Cluster708        | 53.00 | Clostridiales      | 220472 | 1922695 |
| Sample_YPB1.Cluster3867       | 40.50 | Clostridiales      | 160685 | 2143353 |
| Sample_YPB1.mb.77             | 37.70 | Clostridiales      | 34158  | 4635425 |
| Sample_YPB1.Cluster425cbin.1  | 56.80 | Bifidobacteriaceae | 194170 | 1823499 |
| Sample_YPB1.mb.6cbin.1        | 59.90 | Actinobacteria     | 104547 | 2183754 |
| Sample_YPB1.mb.16             | 58.50 | Clostridiales      | 45503  | 2439835 |
| Sample_YPB1.mb.21             | 62.90 | Bifidobacteriaceae | 130506 | 2088771 |
| Sample_YPB1.mb.39             | 34.80 | Lactobacillus      | 110268 | 1952441 |
| Sample_YPB1.Cluster447cbin.1  | 58.60 | Bacteroidetes      | 66811  | 3114729 |
| Sample_YPB1.mb.23             | 60.10 | Bifidobacteriaceae | 55761  | 2077057 |
| Sample_YPB1.mb.59cbin.1       | 56.50 | Clostridiales      | 55483  | 2834807 |
| Sample_YPB1.mb.38             | 43.20 | Clostridiales      | 114640 | 2456379 |
| Sample_YPB1.mb.8cbin.1        | 57.20 | Proteobacteria     | 94918  | 2441976 |
| Sample_YPB1.mb.17cbin.1       | 45.50 | Prevotella         | 52834  | 3643269 |
| Sample_YPB1.Cluster1122cbin.1 | 49.30 | Lachnospiraceae    | 94440  | 3015152 |
| Sample_YPB1.mb.36             | 44.60 | Clostridiales      | 39743  | 3055189 |
| Sample_YPB1.mb.49cbin.1       | 41.10 | Lachnospiraceae    | 113359 | 3026480 |
| Sample_YPB1.Cluster2259cbin.1 | 43.10 | Bacteria           | 11131  | 3835938 |
| Sample_YPB1.Cluster1036cbin.1 | 46.70 | Bacteroidales      | 80151  | 4050920 |
| Sample_YPB1.mb.32             | 41.60 | Bacteroidales      | 36360  | 5182440 |
| Sample_YPB1.mb.44cbin.1       | 41.70 | Bacteroides        | 108420 | 5996150 |
| Sample_YPB2.Cluster12916      | 25.50 | Bacteria           | 197846 | 1137348 |
| Sample_YPB2.Cluster12477      | 29.50 | Bacteria           | 126671 | 1474787 |
| Sample_YPB2.Cluster11555      | 36.50 | Clostridiales      | 363704 | 1889485 |
| Sample_YPB2.Cluster5718cbin.1 | 43.90 | Clostridiales      | 20588  | 2697535 |

|                               |       |                    |        |         |
|-------------------------------|-------|--------------------|--------|---------|
| Sample_YPB2.mb.48             | 27.40 | Bacteria           | 28409  | 1567463 |
| Sample_YPB2.mb.21             | 38.30 | Clostridiales      | 8506   | 2076674 |
| Sample_YPB2.Cluster87         | 59.80 | Clostridiales      | 38060  | 1758846 |
| Sample_YPB2.Cluster2520       | 53.10 | Clostridiales      | 126460 | 1833504 |
| Sample_YPB2.mb.15             | 60.90 | Clostridiales      | 36998  | 2319994 |
| Sample_YPB2.mb.24cbin.1       | 53.00 | Clostridiales      | 56193  | 2129023 |
| Sample_YPB2.Cluster9399cbin.1 | 40.80 | Lachnospiraceae    | 138548 | 2606803 |
| Sample_YPB2.mb.32cbin.1       | 47.80 | Clostridiales      | 129659 | 3093258 |
| Sample_YPB2.Cluster1278       | 55.60 | Proteobacteria     | 115829 | 2181164 |
| Sample_YPB2.mb.4cbin.1        | 32.40 | Clostridiales      | 8926   | 4162553 |
| Sample_YPB2.mb.5cbin.1        | 57.90 | Clostridiales      | 60293  | 3177614 |
| Sample_YPB2.Cluster1528cbin.1 | 58.50 | Bacteroidetes      | 89978  | 3224636 |
| Sample_YPB2.mb.93cbin.1       | 49.50 | Clostridiales      | 133304 | 1944001 |
| Sample_YPB2.Cluster9659       | 40.20 | Clostridiales      | 326056 | 2231698 |
| Sample_YPB2.mb.56             | 45.10 | Clostridiales      | 118636 | 2676025 |
| Sample_YPB2.mb.1              | 42.90 | Lachnospiraceae    | 44188  | 2332793 |
| Sample_YPB2.mb.6              | 46.20 | Bacteroidetes      | 12760  | 2210978 |
| Sample_YPB2.mb.58cbin.1       | 56.50 | Clostridiales      | 12552  | 2428577 |
| Sample_YPB2.mb.73             | 60.00 | Actinobacteria     | 29157  | 2134287 |
| Sample_YPB2.mb.27cbin.1       | 40.80 | Lachnospiraceae    | 72052  | 3182510 |
| Sample_YPB2.mb.74             | 51.90 | Firmicutes         | 31659  | 2216675 |
| Sample_YPB2.mb.83             | 44.00 | Lachnospiraceae    | 87814  | 2668258 |
| Sample_YPB2.mb.67cbin.1       | 56.30 | Bifidobacteriaceae | 392571 | 2107752 |
| Sample_YPB2.mb.69             | 45.30 | Clostridiales      | 84029  | 2220425 |
| Sample_YPB2.mb.72             | 46.80 | Lachnospiraceae    | 26501  | 3292483 |
| Sample_YPB2.Cluster3860       | 45.40 | Bacteroidales      | 59549  | 3962070 |
| Sample_YPB2.mb.75cbin.1       | 44.30 | Prevotella         | 25371  | 3884175 |
| Sample_YPB2.Cluster947        | 56.50 | Pseudomonadales    | 278233 | 5173266 |
| Sample_YPB3.Cluster3030cbin.1 | 43.90 | Clostridiales      | 9244   | 2681939 |
| Sample_YPB3.mb.31             | 58.10 | Clostridiales      | 6914   | 1959217 |
| Sample_YPB3.mb.59             | 58.30 | Clostridia         | 30381  | 2958982 |
| Sample_YPB3.mb.47cbin.1       | 44.80 | Clostridiales      | 29272  | 2671141 |
| Sample_YPB3.Cluster1cbin.1    | 66.30 | Actinobacteria     | 218894 | 2060869 |
| Sample_YPB3.Cluster1244       | 51.80 | Clostridiales      | 120033 | 2327695 |
| Sample_YPB3.Cluster2914       | 47.10 | Lactobacillales    | 125528 | 1846833 |
| Sample_YPB3.mb.39cbin.1       | 48.30 | Clostridiales      | 39080  | 2904857 |
| Sample_YPB3.mb.8              | 59.60 | Clostridiales      | 7124   | 1673766 |
| Sample_YPB3.mb.20             | 58.90 | Bacteroidetes      | 15909  | 2368096 |
| Sample_YPB3.Cluster4065       | 41.00 | Clostridiales      | 182350 | 1836521 |
| Sample_YPB3.mb.26             | 56.40 | Clostridiales      | 14118  | 2518550 |
| Sample_YPB3.Cluster145cbin.1  | 51.80 | Clostridiales      | 66072  | 2260931 |
| Sample_YPB3.Cluster33cbin.1   | 60.00 | Bifidobacteriaceae | 65363  | 2035029 |
| Sample_YPB3.mb.40             | 45.30 | Clostridiales      | 10681  | 2196423 |
| Sample_YPB3.Cluster1000       | 56.30 | Selenomonadales    | 129884 | 2216156 |
| Sample_YPB3.Cluster867cbin.1  | 54.10 | Selenomonadales    | 44988  | 2325139 |
| Sample_YPB3.Cluster1114cbin.1 | 56.00 | Bifidobacteriaceae | 145711 | 2058229 |
| Sample_YPB3.Cluster198        | 59.70 | Bacteroidetes      | 32495  | 2750931 |
| Sample_YPB3.Cluster2149cbin.1 | 51.40 | Prevotella         | 87236  | 3127462 |
| Sample_YPB3.Cluster2564       | 46.70 | Bacteroidales      | 240487 | 4107133 |
| Sample_YPB4.Cluster6185       | 27.80 | Bacteria           | 309168 | 1318263 |
| Sample_YPB4.mb.26cbin.1       | 38.40 | Clostridiales      | 6922   | 2053041 |
| Sample_YPB4.Cluster2405       | 44.00 | Clostridiales      | 174255 | 2890254 |
| Sample_YPB4.Cluster2143       | 41.60 | Clostridiales      | 132931 | 2827176 |
| Sample_YPB4.Cluster3798       | 40.90 | Clostridiales      | 81253  | 3098333 |
| Sample_YPB4.mb.5cbin.1        | 44.60 | Clostridiales      | 19067  | 2606820 |
| Sample_YPB4.Cluster1733       | 46.90 | Lactobacillales    | 87825  | 1658709 |
| Sample_YPB4.mb.68             | 48.20 | Clostridiales      | 60375  | 2952667 |
| Sample_YPB4.mb.8cbin.1        | 51.50 | Clostridiales      | 120001 | 2450194 |

|                               |       |                    |        |         |
|-------------------------------|-------|--------------------|--------|---------|
| Sample_YPB4.Cluster16         | 60.30 | Clostridiales      | 98185  | 2311180 |
| Sample_YPB4.Cluster60cbin.1   | 56.20 | Clostridiales      | 15752  | 2599965 |
| Sample_YPB4.Cluster342        | 51.60 | Clostridiales      | 58866  | 2194962 |
| Sample_YPB4.mb.62             | 43.50 | Lachnospiraceae    | 18289  | 1865402 |
| Sample_YPB4.mb.43cbin.1       | 44.20 | Clostridiales      | 8947   | 2907651 |
| Sample_YPB4.Cluster4709cbin.1 | 37.80 | Clostridiales      | 113816 | 2037245 |
| Sample_YPB4.mb.19cbin.1       | 56.40 | Selenomonadales    | 102929 | 2167489 |
| Sample_YPB4.Cluster3580       | 40.60 | Clostridiales      | 247706 | 2164376 |
| Sample_YPB4.mb.30cbin.1       | 54.20 | Selenomonadales    | 41950  | 2208062 |
| Sample_YPB4.mb.34             | 34.60 | Lactobacillus      | 325310 | 1806248 |
| Sample_YPB4.Cluster5996       | 32.50 | Lactobacillales    | 109568 | 1861715 |
| Sample_YPB4.mb.29cbin.1       | 44.80 | Clostridiales      | 25645  | 2507059 |
| Sample_YPB4.Cluster170        | 56.10 | Bifidobacteriaceae | 283979 | 2162616 |
| Sample_YPB4.mb.60cbin.1       | 60.30 | Bifidobacteriaceae | 103967 | 2382984 |
| Sample_YPB4.mb.55             | 50.20 | Lachnospiraceae    | 13668  | 2615758 |
| Sample_YPB4.mb.51cbin.1       | 51.10 | Prevotella         | 83514  | 3158703 |
| Sample_YPB4.Cluster1428       | 46.40 | Bacteroidales      | 222748 | 4376915 |
| Sample_YPB4.mb.13             | 45.10 | Bacteroidales      | 19154  | 4606859 |
| Sample_YPB4.mb.11cbin.1       | 41.40 | Bacteroidales      | 31144  | 5075459 |
| Sample_YPB5.Cluster8314cbin.1 | 26.30 | Bacteria           | 9432   | 1042359 |
| Sample_YPB5.Cluster5620cbin.1 | 39.00 | Clostridiales      | 7870   | 2300362 |
| Sample_YPB5.Cluster3185cbin.1 | 44.60 | Clostridiales      | 24774  | 2486333 |
| Sample_YPB5.mb.25cbin.1       | 42.20 | Clostridiales      | 10025  | 2363910 |
| Sample_YPB5.mb.30cbin.1       | 58.00 | Clostridiales      | 60083  | 2680845 |
| Sample_YPB5.mb.42             | 36.20 | Clostridiales      | 127704 | 2462170 |
| Sample_YPB5.Cluster5686       | 40.90 | Lachnospiraceae    | 92472  | 2569951 |
| Sample_YPB5.mb.19cbin.1       | 58.40 | Clostridiales      | 62083  | 2245962 |
| Sample_YPB5.mb.24cbin.1       | 57.50 | Clostridiales      | 71304  | 2425405 |
| Sample_YPB5.Cluster488cbin.1  | 59.90 | Actinobacteria     | 26129  | 2060528 |
| Sample_YPB5.Cluster5204cbin.1 | 50.50 | Clostridiales      | 152426 | 2676717 |
| Sample_YPB5.mb.65cbin.1       | 53.10 | Clostridia         | 14711  | 1930857 |
| Sample_YPB5.Cluster2663cbin.1 | 47.90 | Bacteroidales      | 10183  | 2736133 |
| Sample_YPB5.Cluster1628cbin.1 | 49.40 | Bacteroidales      | 93218  | 2717292 |
| Sample_YPB5.Cluster5889cbin.1 | 38.80 | Clostridiales      | 85322  | 1992875 |
| Sample_YPB5.mb.36cbin.1       | 41.30 | Clostridiales      | 7794   | 1586585 |
| Sample_YPB5.mb.75             | 49.40 | Clostridiales      | 88311  | 1973611 |
| Sample_YPB5.mb.56             | 41.10 | Clostridiales      | 48437  | 3007906 |
| Sample_YPB5.Cluster1199cbin.1 | 51.00 | Firmicutes         | 42201  | 2370887 |
| Sample_YPB5.Cluster4488cbin.1 | 46.70 | Lachnospiraceae    | 70471  | 3355139 |
| Sample_YPB5.mb.23             | 60.60 | Clostridiales      | 10923  | 2309697 |
| Sample_YPB5.mb.57             | 61.50 | Clostridiales      | 107591 | 1913378 |
| Sample_YPB5.Cluster400cbin.1  | 55.80 | Proteobacteria     | 35544  | 2133694 |
| Sample_YPB5.mb.5              | 54.60 | Bacteroidetes      | 95365  | 2123103 |
| Sample_YPB5.Cluster1691cbin.1 | 50.40 | Bacteroidales      | 66734  | 2302546 |
| Sample_YPB5.mb.54cbin.1       | 45.20 | Clostridiales      | 102984 | 2641797 |
| Sample_YPB5.mb.63cbin.1       | 48.50 | Clostridiales      | 23948  | 2786452 |
| Sample_YPB5.Cluster7289cbin.1 | 37.20 | Clostridiales      | 141438 | 2823259 |
| Sample_YPB5.mb.38             | 41.80 | Lachnospiraceae    | 81164  | 2550441 |
| Sample_YPB5.mb.46             | 40.90 | Clostridiales      | 29523  | 2560430 |
| Sample_YPB5.mb.33             | 49.80 | Lachnospiraceae    | 20209  | 2826130 |
| Sample_YPB5.mb.74             | 44.80 | Clostridiales      | 176839 | 1767304 |
| Sample_YPB5.mb.47             | 45.00 | Bacteroidales      | 21650  | 2901317 |
| Sample_YPB5.mb.78             | 41.50 | Clostridiales      | 36431  | 2434466 |
| Sample_YPB5.Cluster6949cbin.1 | 40.60 | Bacteroidales      | 40027  | 3833053 |
| Sample_YPB5.Cluster2441cbin.1 | 44.70 | Bacteroidales      | 89485  | 3616756 |
| Sample_YPB5.mb.9              | 38.50 | Clostridiales      | 115216 | 3025331 |
| Sample_YPB5.mb.40             | 46.60 | Bacteroidales      | 148303 | 4101365 |
| Sample_YPB6.Cluster2046cbin.1 | 45.10 | Bacteria           | 127526 | 4565766 |



|                                |       |                    |        |         |
|--------------------------------|-------|--------------------|--------|---------|
| Sample_YPB6.mb.27              | 58.40 | Clostridiales      | 7229   | 2615458 |
| Sample_YPB6.mb.42cbin.1        | 53.40 | Clostridiales      | 32133  | 2535940 |
| Sample_YPB6.mb.23cbin.1        | 55.80 | Bacteroidetes      | 7208   | 1701347 |
| Sample_YPB6.mb.37cbin.1        | 59.80 | Clostridiales      | 85431  | 3179040 |
| Sample_YPB6.mb.30cbin.1        | 56.50 | Clostridiales      | 6344   | 2243112 |
| Sample_YPB6.mb.47cbin.1        | 50.40 | Bacteroidales      | 61789  | 2700648 |
| Sample_YPB6.mb.2               | 52.50 | Firmicutes         | 50566  | 2406007 |
| Sample_YPB6.Cluster3534        | 40.70 | Clostridiales      | 302021 | 2103463 |
| Sample_YPB6.mb.12              | 32.60 | Bacteria           | 4600   | 2946295 |
| Sample_YPB6.mb.13cbin.1        | 48.40 | Proteobacteria     | 17025  | 2565476 |
| Sample_YPB6.Cluster3334cbin.1  | 44.20 | Bacteroidales      | 87463  | 3779030 |
| Sample_YPB6.mb.24              | 46.60 | Bacteroidales      | 98064  | 3297282 |
| Sample_YPB6.Cluster1198cbin.1  | 49.10 | Clostridiales      | 112463 | 6807916 |
| Sample_YPB6.Cluster1316cbin.1  | 49.30 | Clostridiales      | 281383 | 5935773 |
| Sample_YPB6.Cluster2752cbin.1  | 41.70 | Bacteroides        | 86480  | 5948014 |
| Sample_YPB6.mb.51              | 42.70 | Bacteroidales      | 80049  | 6604219 |
| Sample_YPB7.Cluster12975       | 26.70 | Bacteria           | 37434  | 1054950 |
| Sample_YPB7.Cluster12994       | 26.00 | Bacteria           | 72405  | 1198076 |
| Sample_YPB7.Cluster1523cbin.1  | 54.00 | Clostridia         | 7317   | 1448646 |
| Sample_YPB7.mb.11              | 53.10 | Clostridia         | 62100  | 1982230 |
| Sample_YPB7.Cluster6653        | 45.40 | Clostridiales      | 76846  | 1744650 |
| Sample_YPB7.Cluster613         | 59.40 | Clostridiales      | 65718  | 2025977 |
| Sample_YPB7.mb.12              | 60.10 | Clostridiales      | 17013  | 2170309 |
| Sample_YPB7.Cluster244cbin.1   | 58.60 | Clostridiales      | 12081  | 2435364 |
| Sample_YPB7.Cluster3668cbin.1  | 56.90 | Clostridiales      | 86985  | 2386872 |
| Sample_YPB7.mb.33              | 61.60 | Clostridiales      | 10157  | 2109584 |
| Sample_YPB7.Cluster5070cbin.1  | 51.40 | Clostridiales      | 163136 | 2158940 |
| Sample_YPB7.mb.34              | 44.70 | Clostridiales      | 20111  | 2060301 |
| Sample_YPB7.mb.39              | 58.40 | Clostridiales      | 13365  | 3138219 |
| Sample_YPB7.mb.28              | 40.70 | Lachnospiraceae    | 82104  | 2732026 |
| Sample_YPB7.mb.69              | 38.90 | Clostridiales      | 88803  | 1971022 |
| Sample_YPB7.mb.7cbin.1         | 55.60 | Clostridiales      | 14313  | 2526715 |
| Sample_YPB7.mb.29              | 48.50 | Proteobacteria     | 10041  | 2376523 |
| Sample_YPB7.Cluster1361        | 58.30 | Bacteroidetes      | 277662 | 3293629 |
| Sample_YPB7.mb.23              | 43.40 | Bacteroidales      | 44481  | 3093266 |
| Sample_YPB7.mb.76              | 60.10 | Clostridiales      | 47619  | 2224047 |
| Sample_YPB7.Cluster10119cbin.1 | 45.30 | Bacteroidales      | 14497  | 3607315 |
| Sample_YPB7.mb.50cbin.1        | 43.10 | Bacteria           | 53440  | 4060885 |
| Sample_YPB7.mb.40cbin.1        | 46.60 | Bacteroidales      | 42843  | 4374354 |
| Sample_YPB7.mb.20              | 42.60 | Bacteroidales      | 71115  | 5198816 |
| Sample_YPB7.mb.67              | 45.10 | Bacteroidales      | 151794 | 4646730 |
| Sample_YPB7.Cluster8264cbin.1  | 50.60 | Enterobacteriaceae | 98226  | 4770210 |
| Sample_YPB7.mb.65cbin.1        | 55.60 | Enterobacteriaceae | 118099 | 4514568 |
| Sample_YPC1.Cluster3916        | 27.50 | Bacteria           | 686357 | 1279636 |
| Sample_YPC1.Cluster2324cbin.1  | 41.10 | Clostridiales      | 84939  | 2359151 |
| Sample_YPC1.mb.55              | 36.30 | Clostridiales      | 30232  | 2518128 |
| Sample_YPC1.Cluster838         | 46.50 | Clostridiales      | 45469  | 1881001 |
| Sample_YPC1.mb.52cbin.1        | 62.10 | Clostridiales      | 260320 | 1945325 |
| Sample_YPC1.Cluster22cbin.1    | 59.50 | Clostridiales      | 135375 | 2166803 |
| Sample_YPC1.Cluster992cbin.1   | 48.00 | Clostridiales      | 155371 | 3093850 |
| Sample_YPC1.mb.58              | 60.70 | Clostridiales      | 43655  | 2311524 |
| Sample_YPC1.mb.45              | 60.00 | Actinobacteria     | 168792 | 2002454 |
| Sample_YPC1.Cluster62cbin.1    | 60.40 | Clostridiales      | 108879 | 2108434 |
| Sample_YPC1.mb.63cbin.1        | 45.80 | Firmicutes         | 48291  | 1658113 |
| Sample_YPC1.Cluster479cbin.1   | 49.10 | Clostridiales      | 72697  | 2926833 |
| Sample_YPC1.Cluster214cbin.1   | 58.00 | Clostridiales      | 73850  | 2494535 |
| Sample_YPC1.Cluster1720        | 40.40 | Clostridiales      | 242811 | 2243226 |
| Sample_YPC1.mb.51              | 62.90 | Bifidobacteriaceae | 27528  | 2079084 |

|                                |       |                    |        |         |
|--------------------------------|-------|--------------------|--------|---------|
| Sample_YPC1.mb.19cbin.1        | 56.80 | Bifidobacteriaceae | 105305 | 2108585 |
| Sample_YPC1.Cluster77          | 57.00 | Proteobacteria     | 426676 | 2507820 |
| Sample_YPC1.Cluster10cbin.1    | 59.60 | Clostridiales      | 49124  | 2186401 |
| Sample_YPC1.Cluster1799        | 42.90 | Clostridiales      | 109570 | 2634769 |
| Sample_YPC1.mb.33              | 38.50 | Selenomonadales    | 80887  | 2122617 |
| Sample_YPC1.mb.32              | 45.00 | Clostridiales      | 24793  | 2611105 |
| Sample_YPC1.Cluster660cbin.1   | 49.20 | Proteobacteria     | 44904  | 2138818 |
| Sample_YPC1.mb.49              | 61.80 | Clostridiales      | 37576  | 3440932 |
| Sample_YPC1.mb.13              | 45.30 | Bacteroidales      | 185470 | 4130009 |
| Sample_YPC1.mb.4cbin.1         | 46.20 | Bacteroidales      | 111265 | 4251566 |
| Sample_YPC2.Cluster12313       | 26.00 | Bacteria           | 81319  | 1248554 |
| Sample_YPC2.Cluster11916       | 29.50 | Bacteria           | 45270  | 1417650 |
| Sample_YPC2.Cluster2866cbin.1  | 53.00 | Clostridia         | 86453  | 2038186 |
| Sample_YPC2.Cluster11967cbin.1 | 33.30 | Clostridiales      | 358172 | 1886999 |
| Sample_YPC2.mb.2               | 46.40 | Clostridiales      | 18567  | 1934026 |
| Sample_YPC2.Cluster314         | 59.00 | Clostridiales      | 33026  | 1989358 |
| Sample_YPC2.mb.4               | 57.50 | Clostridiales      | 12573  | 1792808 |
| Sample_YPC2.mb.72              | 25.10 | Bacteria           | 20138  | 1451294 |
| Sample_YPC2.mb.58              | 58.20 | Clostridiales      | 27935  | 2973239 |
| Sample_YPC2.mb.28              | 61.20 | Clostridiales      | 43322  | 2085675 |
| Sample_YPC2.mb.45              | 60.00 | Clostridiales      | 76421  | 2009346 |
| Sample_YPC2.mb.42cbin.1        | 47.90 | Clostridiales      | 98484  | 3050748 |
| Sample_YPC2.mb.11              | 53.70 | Clostridiales      | 306636 | 1706490 |
| Sample_YPC2.Cluster623cbin.1   | 56.20 | Clostridiales      | 14429  | 2536879 |
| Sample_YPC2.mb.21              | 55.40 | Bacteroidetes      | 36067  | 1897905 |
| Sample_YPC2.mb.49cbin.1        | 56.00 | Clostridiales      | 14547  | 2806726 |
| Sample_YPC2.Cluster2726cbin.1  | 51.90 | Clostridiales      | 116756 | 2258001 |
| Sample_YPC2.Cluster9181        | 40.70 | Clostridiales      | 214303 | 2108520 |
| Sample_YPC2.mb.10              | 55.70 | Bacteria           | 143244 | 2538119 |
| Sample_YPC2.mb.66              | 62.20 | Clostridiales      | 147648 | 1944001 |
| Sample_YPC2.Cluster1309        | 54.60 | Bacteroidales      | 72745  | 2294165 |
| Sample_YPC2.Cluster752cbin.1   | 56.60 | Bifidobacteriaceae | 21249  | 2021463 |
| Sample_YPC2.mb.39cbin.1        | 43.50 | Selenomonadales    | 34868  | 2420804 |
| Sample_YPC2.mb.77              | 58.90 | Clostridiales      | 56877  | 2076792 |
| Sample_YPC2.mb.25cbin.1        | 40.90 | Clostridiales      | 12758  | 2520068 |
| Sample_YPC2.mb.9cbin.1         | 56.90 | Clostridiales      | 27618  | 1904606 |
| Sample_YPC2.mb.31              | 57.20 | Clostridiales      | 20054  | 3073850 |
| Sample_YPC2.Cluster11303cbin.1 | 41.10 | Lachnospiraceae    | 86166  | 3233635 |
| Sample_YPC2.Cluster10628       | 38.40 | Bacteroidales      | 64989  | 3103153 |
| Sample_YPC2.mb.54cbin.1        | 43.20 | Clostridiales      | 122596 | 2514264 |
| Sample_YPC2.Cluster6818cbin.1  | 43.40 | Bacteroidales      | 288695 | 3109358 |
| Sample_YPC2.mb.59cbin.1        | 45.00 | Clostridiales      | 56134  | 2899846 |
| Sample_YPC2.Cluster5220cbin.1  | 48.50 | Bacteroidales      | 173705 | 3571672 |
| Sample_YPC2.Cluster7809cbin.1  | 44.80 | Bacteroidales      | 73386  | 3869861 |
| Sample_YPC2.Cluster5530        | 45.10 | Bacteroidales      | 163477 | 4568647 |
| Sample_YPC3.mb.11              | 58.90 | Clostridia         | 6412   | 2501260 |
| Sample_YPC3.Cluster277         | 59.90 | Actinobacteria     | 202501 | 2321807 |
| Sample_YPC3.mb.16              | 56.50 | Clostridiales      | 53862  | 2767848 |
| Sample_YPC3.Cluster3714cbin.1  | 48.10 | Clostridiales      | 82620  | 2918619 |
| Sample_YPC3.Cluster3877        | 47.00 | Lactobacillales    | 129948 | 1863239 |
| Sample_YPC3.mb.1               | 61.00 | Clostridiales      | 15930  | 2815922 |
| Sample_YPC3.Cluster4271cbin.1  | 44.60 | Clostridiales      | 74262  | 2737248 |
| Sample_YPC3.Cluster65          | 60.80 | Clostridiales      | 103231 | 2097786 |
| Sample_YPC3.Cluster333cbin.1   | 56.40 | Clostridiales      | 15196  | 2423073 |
| Sample_YPC3.Cluster3516        | 44.00 | Selenomonadales    | 72759  | 2288678 |
| Sample_YPC3.Cluster1980cbin.1  | 51.60 | Clostridiales      | 59819  | 2195134 |
| Sample_YPC3.Cluster5558        | 40.70 | Clostridiales      | 439535 | 2155673 |
| Sample_YPC3.Cluster1901cbin.1  | 56.80 | Clostridiales      | 82490  | 2772015 |

|                                |       |                     |        |         |
|--------------------------------|-------|---------------------|--------|---------|
| Sample_YPC3.mb.47cbin.1        | 55.20 | Selenomonadales     | 15798  | 1969889 |
| Sample_YPC3.mb.3               | 34.60 | Lactobacillus       | 325310 | 1809315 |
| Sample_YPC3.mb.37cbin.1        | 40.10 | Streptococcus       | 6813   | 1674145 |
| Sample_YPC3.Cluster19          | 60.30 | Bifidobacteriaceae  | 100296 | 2297096 |
| Sample_YPC3.Cluster1253        | 56.20 | Bifidobacteriaceae  | 391208 | 2154015 |
| Sample_YPC3.mb.19              | 58.80 | Bacteroidetes       | 168144 | 2876991 |
| Sample_YPC3.mb.50              | 43.00 | Clostridiales       | 162548 | 2781524 |
| Sample_YPC3.mb.45cbin.1        | 59.00 | Clostridiales       | 52045  | 2550536 |
| Sample_YPC3.mb.23              | 44.20 | Clostridiales       | 16021  | 3292325 |
| Sample_YPC3.Cluster3672cbin.1  | 45.30 | Bacteroidales       | 120879 | 4264281 |
| Sample_YPC3.mb.13cbin.1        | 46.40 | Bacteroidales       | 171847 | 4286962 |
| Sample_YPC4.Cluster7056        | 43.60 | Clostridiales       | 82261  | 2651486 |
| Sample_YPC4.Cluster2418cbin.1  | 54.30 | Actinobacteria      | 22395  | 1581634 |
| Sample_YPC4.Cluster3903cbin.1  | 48.80 | Clostridiales       | 7879   | 2499475 |
| Sample_YPC4.Cluster699         | 60.50 | Clostridiales       | 70942  | 1786204 |
| Sample_YPC4.Cluster795cbin.1   | 56.30 | Clostridiales       | 37595  | 2624808 |
| Sample_YPC4.Cluster448cbin.1   | 61.00 | Clostridiales       | 108084 | 2154662 |
| Sample_YPC4.mb.52              | 62.00 | Clostridiales       | 10401  | 1889584 |
| Sample_YPC4.mb.71cbin.1        | 59.30 | Clostridiales       | 6769   | 1782709 |
| Sample_YPC4.mb.12cbin.1        | 48.70 | Firmicutes          | 30417  | 1874691 |
| Sample_YPC4.Cluster4622cbin.1  | 45.50 | Bacteroidales       | 116576 | 3534520 |
| Sample_YPC4.mb.27              | 51.50 | Clostridiales       | 236332 | 2071565 |
| Sample_YPC4.Cluster8779        | 38.10 | Clostridiales       | 209589 | 1923899 |
| Sample_YPC4.Cluster8162        | 40.50 | Clostridiales       | 148195 | 2174043 |
| Sample_YPC4.mb.65cbin.1        | 57.90 | Clostridiales       | 44211  | 2610525 |
| Sample_YPC4.mb.30              | 55.20 | Bacteroidetes       | 64066  | 2640748 |
| Sample_YPC4.mb.7cbin.1         | 61.40 | Clostridiales       | 65994  | 2112432 |
| Sample_YPC4.mb.15cbin.1        | 46.30 | Clostridiales       | 59537  | 2492689 |
| Sample_YPC4.Cluster8636cbin.1  | 37.40 | Clostridiales       | 28608  | 2723328 |
| Sample_YPC4.mb.36cbin.1        | 55.80 | Clostridiales       | 50792  | 3301712 |
| Sample_YPC4.mb.80              | 55.00 | Bacteroidetes       | 117948 | 1972747 |
| Sample_YPC4.mb.35              | 44.40 | Bacteria            | 7392   | 3477884 |
| Sample_YPC4.mb.47cbin.1        | 41.60 | Lachnospiraceae     | 64609  | 2457930 |
| Sample_YPC4.mb.74cbin.1        | 57.30 | Clostridiales       | 30123  | 2483033 |
| Sample_YPC4.Cluster4564cbin.1  | 42.60 | Lachnospiraceae     | 35888  | 3776397 |
| Sample_YPC4.mb.83cbin.1        | 46.40 | Bacteroidales       | 144412 | 4122114 |
| Sample_YPC4.mb.9cbin.1         | 45.00 | Bacteroidales       | 165588 | 4721912 |
| Sample_YPC5.Cluster10878       | 29.50 | Bacteria            | 159896 | 1074323 |
| Sample_YPC5.Cluster1749cbin.1  | 53.10 | Clostridia          | 52007  | 2164198 |
| Sample_YPC5.Cluster3557        | 49.30 | Clostridiales       | 96829  | 1942892 |
| Sample_YPC5.mb.27cbin.1        | 36.30 | Clostridiales       | 222559 | 1930757 |
| Sample_YPC5.Cluster10250cbin.1 | 33.30 | Clostridiales       | 153862 | 3501426 |
| Sample_YPC5.Cluster149cbin.1   | 61.20 | Clostridiales       | 78480  | 1965311 |
| Sample_YPC5.mb.56cbin.1        | 58.20 | Clostridiales       | 45016  | 2976173 |
| Sample_YPC5.Cluster480cbin.1   | 61.50 | Clostridiales       | 69178  | 2064472 |
| Sample_YPC5.Cluster11cbin.1    | 60.90 | Clostridiales       | 103535 | 2065614 |
| Sample_YPC5.mb.31              | 62.30 | Clostridiales       | 28074  | 2042724 |
| Sample_YPC5.mb.24              | 56.60 | Clostridiales       | 12280  | 2121845 |
| Sample_YPC5.Cluster5474cbin.1  | 45.30 | Clostridiales       | 87610  | 2770553 |
| Sample_YPC5.Cluster3768cbin.1  | 46.90 | Proteobacteria      | 81954  | 1871824 |
| Sample_YPC5.mb.38cbin.1        | 56.30 | Clostridiales       | 18115  | 2541091 |
| Sample_YPC5.Cluster3cbin.1     | 60.30 | Bifidobacteriaceae  | 9089   | 2114457 |
| Sample_YPC5.Cluster12cbin.1    | 63.90 | Deltaproteobacteria | 12053  | 2426257 |
| Sample_YPC5.mb.3               | 54.30 | Bacteroidetes       | 85088  | 2532875 |
| Sample_YPC5.mb.53              | 38.80 | Clostridiales       | 58643  | 1979436 |
| Sample_YPC5.mb.36              | 41.30 | Clostridiales       | 117661 | 2550634 |
| Sample_YPC5.mb.85              | 36.30 | Clostridiales       | 60371  | 2408355 |
| Sample_YPC5.mb.51cbin.1        | 51.00 | Firmicutes          | 42432  | 2342417 |

|                               |       |                    |        |         |
|-------------------------------|-------|--------------------|--------|---------|
| Sample_YPC5.mb.80             | 61.10 | Clostridiales      | 12638  | 2020415 |
| Sample_YPC5.mb.37cbin.1       | 37.40 | Clostridiales      | 122729 | 2563590 |
| Sample_YPC5.mb.25cbin.1       | 42.00 | Lachnospiraceae    | 40231  | 2624430 |
| Sample_YPC5.mb.69             | 46.20 | Bacteroidetes      | 106743 | 2395009 |
| Sample_YPC5.Cluster7905cbin.1 | 41.80 | Lachnospiraceae    | 76747  | 2373919 |
| Sample_YPC5.mb.79cbin.1       | 51.20 | Clostridiales      | 136561 | 2254868 |
| Sample_YPC5.mb.48             | 44.90 | Bacteroidales      | 36172  | 3202798 |
| Sample_YPC5.mb.84cbin.1       | 40.10 | Clostridiales      | 223886 | 2381439 |
| Sample_YPC5.Cluster5166cbin.1 | 43.00 | Bacteria           | 48753  | 4254584 |
| Sample_YPC5.mb.62             | 40.60 | Bacteroidales      | 46724  | 3066155 |
| Sample_YPC5.Cluster2626       | 45.70 | Bacteroidales      | 30295  | 3766760 |
| Sample_YPC5.mb.73cbin.1       | 44.70 | Clostridiales      | 81008  | 3035214 |
| Sample_YPC5.Cluster4418cbin.1 | 46.20 | Bacteroidales      | 130978 | 4508038 |
| Sample_YPC5.mb.70             | 45.00 | Bacteroidales      | 123002 | 4700477 |
| Sample_YPC6.Cluster7961       | 42.90 | Clostridiales      | 91069  | 2069021 |
| Sample_YPC6.Cluster8978cbin.1 | 38.10 | Clostridiales      | 71529  | 2789171 |
| Sample_YPC6.mb.26             | 57.20 | Clostridiales      | 87429  | 1738453 |
| Sample_YPC6.Cluster445        | 59.60 | Clostridiales      | 37725  | 1825496 |
| Sample_YPC6.Cluster10275      | 33.60 | Bacteria           | 7179   | 1613996 |
| Sample_YPC6.Cluster206        | 59.10 | Clostridiales      | 11644  | 1999264 |
| Sample_YPC6.mb.44cbin.1       | 57.70 | Clostridiales      | 25386  | 1718212 |
| Sample_YPC6.mb.66             | 59.30 | Clostridiales      | 14059  | 1832604 |
| Sample_YPC6.mb.19cbin.1       | 52.30 | Clostridiales      | 9002   | 1915613 |
| Sample_YPC6.mb.12             | 54.50 | Clostridiales      | 8768   | 1576099 |
| Sample_YPC6.mb.69             | 60.80 | Clostridiales      | 34519  | 2269785 |
| Sample_YPC6.mb.5              | 60.00 | Actinobacteria     | 85629  | 2227602 |
| Sample_YPC6.mb.21             | 44.20 | Clostridiales      | 10740  | 2795682 |
| Sample_YPC6.Cluster4134cbin.1 | 51.70 | Clostridiales      | 184999 | 2154854 |
| Sample_YPC6.mb.15             | 56.20 | Clostridiales      | 16869  | 2538886 |
| Sample_YPC6.mb.56             | 55.10 | Bacteroidetes      | 23118  | 2671336 |
| Sample_YPC6.mb.71             | 54.50 | Selenomonadales    | 56801  | 2233808 |
| Sample_YPC6.mb.67             | 41.00 | Lachnospiraceae    | 64973  | 2663925 |
| Sample_YPC6.Cluster781        | 58.40 | Bacteroidetes      | 179582 | 3185175 |
| Sample_YPC6.mb.57cbin.1       | 48.50 | Proteobacteria     | 25069  | 2298887 |
| Sample_YPC6.mb.68cbin.1       | 43.10 | Bacteria           | 53907  | 4149223 |
| Sample_YPC6.mb.41             | 46.90 | Bacteroidales      | 43047  | 4236821 |
| Sample_YPC6.mb.42cbin.1       | 41.90 | Bacteroidales      | 66703  | 4908680 |
| Sample_YPC6.mb.50             | 45.00 | Bacteroidales      | 141658 | 4758912 |
| Sample_YPC6.mb.9              | 42.70 | Bacteroidales      | 130438 | 5312946 |
| Sample_YPC6.Cluster2250cbin.1 | 50.70 | Enterobacteriaceae | 143177 | 4749113 |
| Sample_YPC7.mb.15             | 43.50 | Clostridiales      | 9479   | 2330615 |
| Sample_YPC7.mb.10             | 43.80 | Clostridiales      | 89988  | 2620679 |
| Sample_YPC7.mb.23             | 61.10 | Clostridiales      | 103004 | 2136736 |
| Sample_YPC7.Cluster3550cbin.1 | 58.50 | Clostridiales      | 94926  | 2331606 |
| Sample_YPC7.mb.63             | 54.50 | Actinobacteria     | 22442  | 1503331 |
| Sample_YPC7.Cluster1606cbin.1 | 57.70 | Clostridiales      | 56974  | 3014041 |
| Sample_YPC7.Cluster3409cbin.1 | 48.50 | Firmicutes         | 32188  | 1892095 |
| Sample_YPC7.Cluster8892       | 38.20 | Clostridiales      | 197505 | 1860140 |
| Sample_YPC7.Cluster3787cbin.1 | 51.20 | Clostridiales      | 133703 | 2147802 |
| Sample_YPC7.mb.3              | 45.00 | Clostridiales      | 217672 | 1717316 |
| Sample_YPC7.mb.81             | 56.60 | Clostridiales      | 32264  | 2513401 |
| Sample_YPC7.Cluster7783cbin.1 | 37.50 | Clostridiales      | 5955   | 2251054 |
| Sample_YPC7.mb.34cbin.1       | 54.10 | Bacteroidetes      | 94658  | 2355378 |
| Sample_YPC7.mb.60cbin.1       | 55.30 | Bacteroidetes      | 26629  | 2598569 |
| Sample_YPC7.mb.42             | 46.20 | Clostridiales      | 50979  | 2451606 |
| Sample_YPC7.mb.78cbin.1       | 45.70 | Bacteroidales      | 116777 | 3425626 |
| Sample_YPC7.Cluster4349cbin.1 | 43.90 | Bacteria           | 7599   | 3743109 |
| Sample_YPC7.Cluster5553cbin.1 | 43.40 | Lachnospiraceae    | 21489  | 2970734 |

|                         |       |                 |        |         |
|-------------------------|-------|-----------------|--------|---------|
| Sample_YPC7.mb.6cbin.1  | 41.90 | Lachnospiraceae | 64470  | 2437213 |
| Sample_YPC7.mb.18cbin.1 | 46.50 | Bacteroidales   | 154265 | 4061493 |
| Sample_YPC7.Cluster5024 | 45.00 | Bacteroidales   | 121699 | 4590884 |
| Sample_YPC7.mb.27       | 42.00 | Bacteroides     | 103143 | 4550475 |
| Sample_YPC7.mb.40       | 43.20 | Bacteroidales   | 215785 | 5091450 |

Supplementary Table 4 Genomic information of 691 species-level genome bins (SGBs)

| MAG ID                          | SGBs      | Genome information |                   |                 |                 |
|---------------------------------|-----------|--------------------|-------------------|-----------------|-----------------|
|                                 | Rename_ID | Number of contigs  | Genome size (Mbp) | N50 length (bp) | N90 length (bp) |
| Sample_LPB05.mb.50              | SGB_486   | 281                | 2732861           | 13267           | 4774            |
| Sample_LCB11.mb.63              | SGB_554   | 44                 | 2790653           | 133506          | 38796           |
| Sample_SCB59.mb.4cbin.1         | SGB_434   | 78                 | 2361674           | 48187           | 15857           |
| Sample_LPA03.mb.15              | SGB_473   | 113                | 2487693           | 39651           | 8633            |
| Sample_SPC08.mb.49              | SGB_7     | 36                 | 2209582           | 102907          | 28807           |
| Sample_SPC21.mb.24cbin.1        | SGB_204   | 47                 | 2979775           | 101089          | 32985           |
| Sample_LCC12.mb.103cbin.1       | SGB_207   | 49                 | 2028878           | 83732           | 17512           |
| Sample_SPB27.mb.66cbin.1        | SGB_406   | 44                 | 2938035           | 87864           | 38796           |
| Sample_YPC3.Cluster277          | SGB_640   | 18                 | 2321807           | 202501          | 59350           |
| Sample_YPA1.mb.4cbin.1          | SGB_62    | 153                | 1687998           | 14554           | 5251            |
| Sample_LCC22.mb.58              | SGB_40    | 83                 | 2493468           | 42060           | 14740           |
| Sample_LPA04.mb.76              | SGB_492   | 47                 | 1854336           | 64897           | 19465           |
| Sample_SCB66.Cluster1136cbin.1  | SGB_34    | 45                 | 2870622           | 114877          | 29863           |
| Sample_SPC06.mb.44cbin.1        | SGB_84    | 6                  | 1104318           | 632868          | 153903          |
| Sample_SPA36.Cluster8708cbin.1  | SGB_184   | 69                 | 2783342           | 76405           | 20467           |
| Sample_SPB09.mb.2               | SGB_327   | 11                 | 1966669           | 238572          | 73590           |
| Sample_SCB59.mb.17cbin.1        | SGB_633   | 14                 | 1671109           | 216632          | 48516           |
| Sample_SCA70.mb.36cbin.1        | SGB_594   | 454                | 3705654           | 11474           | 3518            |
| Sample_SPA45.mb.67              | SGB_477   | 79                 | 3015674           | 65141           | 21027           |
| Sample_LPA03.mb.30              | SGB_659   | 322                | 3000735           | 12969           | 4465            |
| Sample_LCA11.mb.88              | SGB_153   | 22                 | 1727017           | 154033          | 31306           |
| Sample_SPA34.Cluster14283cbin.1 | SGB_106   | 38                 | 1254767           | 82738           | 17818           |
| Sample_SCA59.mb.86              | SGB_553   | 8                  | 2813988           | 517187          | 290324          |
| Sample_LPB03.mb.50              | SGB_561   | 60                 | 2976634           | 79731           | 25119           |
| Sample_SPC13.mb.88              | SGB_506   | 312                | 1673310           | 6172            | 2869            |
| Sample_SPB31.mb.86              | SGB_508   | 68                 | 1814198           | 43182           | 14467           |
| Sample_SPB35.mb.107             | SGB_244   | 51                 | 1674337           | 47106           | 17842           |
| Sample_SCC55.mb.41              | SGB_159   | 99                 | 3218793           | 68154           | 15490           |
| Sample_LPC03.Cluster1576cbin.1  | SGB_560   | 54                 | 2383028           | 69771           | 21230           |
| Sample_LPB03.mb.71cbin.1        | SGB_108   | 23                 | 1295902           | 154057          | 31253           |
| Sample_SPC17.Cluster306cbin.1   | SGB_430   | 151                | 2685819           | 26353           | 7891            |
| Sample_YPC2.mb.31               | SGB_315   | 230                | 3073850           | 20054           | 6367            |
| Sample_SPB06.mb.44              | SGB_396   | 77                 | 2914362           | 75695           | 26073           |
| Sample_LCC21.Cluster163         | SGB_626   | 160                | 1539610           | 14043           | 4892            |
| Sample_SPA16.mb.69              | SGB_644   | 23                 | 2425821           | 155051          | 43264           |
| Sample_SPB17.mb.15cbin.1        | SGB_645   | 111                | 2276157           | 32976           | 9800            |
| Sample_SPB06.mb.139             | SGB_213   | 142                | 2324094           | 23423           | 8048            |
| Sample_SPB39.mb.64              | SGB_298   | 179                | 1611216           | 13497           | 4165            |
| Sample_SPC41.mb.11              | SGB_208   | 111                | 2522795           | 30662           | 10846           |
| Sample_LPA05.mb.17              | SGB_49    | 58                 | 1768719           | 41777           | 14797           |
| Sample_SPB47.Cluster10470       | SGB_134   | 91                 | 2760674           | 51570           | 16188           |
| Sample_LPC05.mb.16cbin.1        | SGB_427   | 64                 | 2994676           | 75146           | 20604           |
| Sample_SPC35.mb.65cbin.1        | SGB_577   | 61                 | 2587439           | 66175           | 23458           |
| Sample_YPC5.Cluster3768cbin.1   | SGB_48    | 44                 | 1871824           | 81954           | 18080           |
| Sample_YPB7.mb.76               | SGB_198   | 78                 | 2224047           | 47619           | 15905           |
| Sample_LPC03.Cluster8563        | SGB_498   | 10                 | 1697679           | 168841          | 118835          |
| Sample_SPC41.mb.20cbin.1        | SGB_483   | 116                | 2765391           | 52912           | 11370           |
| Sample_SPB16.mb.58              | SGB_363   | 20                 | 2415767           | 187409          | 54510           |
| Sample_SPA03.mb.7               | SGB_336   | 10                 | 2009618           | 493272          | 142434          |
| Sample_LCC17.Cluster16367       | SGB_107   | 13                 | 1208669           | 175020          | 53700           |
| Sample_SPC35.mb.88              | SGB_654   | 19                 | 1818800           | 112665          | 53977           |
| Sample_SPA06.mb.70              | SGB_395   | 265                | 2199822           | 11768           | 3711            |

|                                 |         |     |         |        |        |
|---------------------------------|---------|-----|---------|--------|--------|
| Sample_SPC06.mb.8               | SGB_152 | 55  | 2697495 | 75742  | 28182  |
| Sample_SPA07.mb.7cbin.1         | SGB_346 | 57  | 2961277 | 86483  | 24387  |
| Sample_SPB35.mb.76cbin.1        | SGB_349 | 29  | 2568252 | 159452 | 53541  |
| Sample_LPC01.mb.111             | SGB_393 | 38  | 2242505 | 103446 | 28935  |
| Sample_SPB09.mb.27              | SGB_410 | 31  | 2709700 | 208653 | 52181  |
| Sample_YPA5.mb.28               | SGB_624 | 96  | 3018383 | 47629  | 18868  |
| Sample_SCC68.mb.50              | SGB_11  | 78  | 4738247 | 105495 | 34543  |
| Sample_SPA39.mb.135             | SGB_12  | 199 | 2877403 | 22760  | 6853   |
| Sample_LPB03.mb.93              | SGB_628 | 42  | 2159130 | 103701 | 24198  |
| Sample_LPB04.mb.12              | SGB_348 | 29  | 2226051 | 131334 | 42373  |
| Sample_LCC20.mb.63              | SGB_161 | 225 | 1533973 | 8841   | 3392   |
| Sample_SCB58.Cluster6891cbin.1  | SGB_568 | 438 | 4907150 | 14750  | 5459   |
| Sample_SCC66.Cluster3790        | SGB_496 | 21  | 1834397 | 107272 | 56464  |
| Sample_LCA10.Cluster63          | SGB_646 | 21  | 2104755 | 138410 | 54211  |
| Sample_LPC01.mb.90              | SGB_356 | 53  | 2623352 | 81988  | 25991  |
| Sample_SPA47.Cluster4099        | SGB_677 | 5   | 1480694 | 543477 | 139136 |
| Sample_SPA45.mb.26              | SGB_676 | 34  | 2060642 | 73878  | 34904  |
| Sample_LCC21.mb.107cbin.1       | SGB_441 | 18  | 2886613 | 180933 | 82826  |
| Sample_LPC03.mb.9cbin.1         | SGB_285 | 67  | 2607915 | 74330  | 18881  |
| Sample_SPA35.mb.59              | SGB_209 | 46  | 2498279 | 95773  | 26610  |
| Sample_SPC03.Cluster7720        | SGB_171 | 24  | 2506866 | 127365 | 53914  |
| Sample_SCA60.mb.13cbin.1        | SGB_300 | 48  | 1994476 | 68944  | 24268  |
| Sample_SPC12.mb.36              | SGB_105 | 32  | 1248956 | 128570 | 21490  |
| Sample_SCB66.Cluster5699        | SGB_570 | 15  | 3301060 | 336434 | 134902 |
| Sample_YPA3.Cluster4908         | SGB_415 | 52  | 2758527 | 83804  | 28991  |
| Sample_SCB67.mb.123cbin.1       | SGB_170 | 85  | 2757152 | 66311  | 14669  |
| Sample_SPB26.Cluster11740cbin.1 | SGB_123 | 73  | 2183732 | 56560  | 16855  |
| Sample_YPC2.mb.2                | SGB_509 | 145 | 1934026 | 18567  | 6381   |
| Sample_SPC13.mb.77              | SGB_449 | 209 | 3196856 | 26149  | 7775   |
| Sample_SPC07.Cluster7505cbin.1  | SGB_414 | 315 | 2437325 | 10690  | 3709   |
| Sample_SCC70.mb.92              | SGB_575 | 120 | 2902092 | 35253  | 12228  |
| Sample_SPB10.mb.53              | SGB_603 | 43  | 3410303 | 158860 | 40882  |
| Sample_SPC08.mb.66              | SGB_86  | 46  | 1149135 | 33617  | 13461  |
| Sample_LCC20.Cluster427cbin.1   | SGB_269 | 100 | 2379266 | 39455  | 12415  |
| Sample_SPC21.mb.73cbin.1        | SGB_525 | 42  | 2281032 | 186701 | 24523  |
| Sample_SPB25.mb.83cbin.1        | SGB_335 | 43  | 2608080 | 123245 | 26099  |
| Sample_SCC68.mb.72cbin.1        | SGB_110 | 60  | 1667013 | 51997  | 12053  |
| Sample_SPA37.mb.69              | SGB_400 | 145 | 3453619 | 49875  | 10889  |
| Sample_SPC45.mb.65              | SGB_288 | 160 | 2134391 | 21051  | 6853   |
| Sample_SPB20.mb.94cbin.1        | SGB_179 | 41  | 2718168 | 111087 | 37269  |
| Sample_SPC06.Cluster5280cbin.1  | SGB_387 | 90  | 2584680 | 41390  | 13324  |
| Sample_LCA12.Cluster4404cbin.1  | SGB_572 | 41  | 2475525 | 88177  | 29944  |
| Sample_SCB55.Cluster6784cbin.1  | SGB_504 | 49  | 1754948 | 44705  | 17996  |
| Sample_SCC64.mb.43cbin.1        | SGB_201 | 88  | 2583381 | 51322  | 14604  |
| Sample_SCC60.mb.28              | SGB_598 | 172 | 2825226 | 21419  | 8656   |
| Sample_LPC01.mb.41              | SGB_471 | 72  | 2600389 | 67469  | 20790  |
| Sample_SPA13.Cluster428cbin.1   | SGB_199 | 47  | 2721915 | 115233 | 29591  |
| Sample_LCB11.Cluster802         | SGB_648 | 25  | 2114414 | 179302 | 60643  |
| Sample_SPB07.Cluster4507cbin.1  | SGB_597 | 36  | 3770281 | 137138 | 63931  |
| Sample_SPB38.Cluster5633        | SGB_619 | 63  | 2792758 | 62414  | 27697  |
| Sample_SPB07.mb.66              | SGB_266 | 177 | 2688861 | 22151  | 7358   |
| Sample_SPA21.mb.25              | SGB_98  | 19  | 1326539 | 148895 | 31192  |
| Sample_YPA2.Cluster10058        | SGB_328 | 18  | 2100509 | 209030 | 42051  |
| Sample_SPC35.mb.71              | SGB_5   | 22  | 2483976 | 201111 | 54446  |
| Sample_SPB25.mb.51              | SGB_485 | 350 | 2181301 | 7219   | 3345   |
| Sample_YPB5.mb.56               | SGB_425 | 95  | 3007906 | 48437  | 16341  |
| Sample_SPB25.Cluster557         | SGB_680 | 21  | 1641065 | 87341  | 33809  |
| Sample_LPB08.Cluster4247        | SGB_462 | 61  | 3021040 | 87170  | 26592  |

|                                 |         |     |         |        |        |
|---------------------------------|---------|-----|---------|--------|--------|
| Sample_SCB69.mb.12              | SGB_630 | 87  | 1775969 | 41585  | 8521   |
| Sample_SPA22.mb.53              | SGB_162 | 245 | 2529954 | 13327  | 4990   |
| Sample_SPA03.Cluster35          | SGB_36  | 103 | 2398288 | 38533  | 10598  |
| Sample_SCB66.mb.84              | SGB_329 | 22  | 2006701 | 196270 | 54345  |
| Sample_LCC13.mb.29              | SGB_245 | 87  | 1897324 | 39290  | 10195  |
| Sample_SPC15.mb.17              | SGB_57  | 113 | 2043372 | 29793  | 8307   |
| Sample_SCA65.Cluster3577cbin.1  | SGB_51  | 36  | 1775109 | 64523  | 26840  |
| Sample_SCB70.mb.14              | SGB_422 | 53  | 2963905 | 108139 | 35094  |
| Sample_YPB6.mb.51               | SGB_614 | 139 | 6604219 | 80049  | 23135  |
| Sample_SCC55.mb.2               | SGB_523 | 7   | 1929681 | 371778 | 138707 |
| Sample_LCA20.mb.34cbin.1        | SGB_283 | 41  | 2160390 | 85333  | 30346  |
| Sample_SCC55.Cluster680cbin.1   | SGB_24  | 42  | 5219743 | 277787 | 56577  |
| Sample_SPA41.Cluster9689        | SGB_325 | 31  | 2388848 | 138982 | 33668  |
| Sample_SPA17.mb.8cbin.1         | SGB_129 | 19  | 1918422 | 224568 | 62010  |
| Sample_SCA55.Cluster10485       | SGB_117 | 107 | 1677449 | 27657  | 8603   |
| Sample_LCB17.Cluster10309cbin.1 | SGB_301 | 17  | 1609210 | 151377 | 54744  |
| Sample_LPC08.mb.10              | SGB_465 | 75  | 3187118 | 68255  | 24417  |
| Sample_LCA15.mb.46              | SGB_392 | 32  | 2394224 | 118508 | 33352  |
| Sample_SPA06.Cluster4973cbin.1  | SGB_386 | 144 | 5499852 | 78062  | 17654  |
| Sample_YPB3.Cluster1cbin.1      | SGB_691 | 19  | 2060869 | 218894 | 68351  |
| Sample_SPB03.mb.2cbin.1         | SGB_601 | 51  | 3431634 | 117189 | 32912  |
| Sample_SPB09.mb.88cbin.1        | SGB_557 | 108 | 3220703 | 42701  | 17719  |
| Sample_YPB6.Cluster1316cbin.1   | SGB_421 | 42  | 5935773 | 281383 | 84286  |
| Sample_SCC55.Cluster435         | SGB_69  | 21  | 2486379 | 335488 | 49048  |
| Sample_YPC3.Cluster4271cbin.1   | SGB_365 | 56  | 2737248 | 74262  | 25370  |
| Sample_SPC09.Cluster1936cbin.1  | SGB_299 | 76  | 2379470 | 52694  | 14542  |
| Sample_LPA02.Cluster184cbin.1   | SGB_221 | 79  | 2184193 | 40366  | 14026  |
| Sample_SCC60.Cluster13861       | SGB_77  | 61  | 1619639 | 42112  | 11771  |
| Sample_SPB34.Cluster11702       | SGB_56  | 54  | 2653438 | 82996  | 23280  |
| Sample_SPC47.mb.63              | SGB_616 | 99  | 3562795 | 63812  | 20538  |
| Sample_SPA38.mb.134             | SGB_311 | 20  | 1855382 | 174728 | 47800  |
| Sample_SPC28.mb.72cbin.1        | SGB_202 | 49  | 2688118 | 102272 | 25922  |
| Sample_SPA41.Cluster9423        | SGB_118 | 23  | 1819711 | 126855 | 50317  |
| Sample_SPC06.mb.21cbin.1        | SGB_381 | 325 | 2991236 | 11969  | 4608   |
| Sample_SPC22.Cluster16607       | SGB_352 | 19  | 1313344 | 135840 | 32019  |
| Sample_SPB25.mb.68              | SGB_629 | 34  | 3184157 | 173393 | 42244  |
| Sample_SCB59.Cluster11926cbin.1 | SGB_337 | 20  | 2003082 | 151700 | 51692  |
| Sample_SPC21.mb.77              | SGB_275 | 38  | 1947810 | 78974  | 28577  |
| Sample_SCB58.mb.15              | SGB_293 | 40  | 1768652 | 73451  | 24477  |
| Sample_SCB61.Cluster8139        | SGB_467 | 15  | 2268691 | 271842 | 89005  |
| Sample_SCA70.Cluster4626cbin.1  | SGB_556 | 209 | 2801022 | 20047  | 6582   |
| Sample_SPC09.mb.33              | SGB_438 | 57  | 2648893 | 77829  | 24702  |
| Sample_LPA02.mb.63              | SGB_96  | 6   | 1150263 | 257512 | 135336 |
| Sample_YPA4.mb.15cbin.1         | SGB_600 | 40  | 4171730 | 161622 | 50008  |
| Sample_LPB04.Cluster2445        | SGB_1   | 34  | 3045963 | 143811 | 43440  |
| Sample_SPC42.mb.29cbin.1        | SGB_353 | 36  | 2262379 | 106598 | 26022  |
| Sample_LCC19.Cluster5834cbin.1  | SGB_376 | 51  | 2617018 | 89126  | 27141  |
| Sample_SPC27.Cluster5420cbin.1  | SGB_330 | 22  | 1900378 | 117224 | 52675  |
| Sample_LCC17.mb.119             | SGB_4   | 199 | 2306101 | 15778  | 5444   |
| Sample_SPB45.mb.75cbin.1        | SGB_265 | 151 | 3157530 | 41648  | 9271   |
| Sample_YPB4.Cluster6185         | SGB_87  | 12  | 1318263 | 309168 | 173193 |
| Sample_SPB45.Cluster2056        | SGB_491 | 23  | 2582299 | 201270 | 52000  |
| Sample_SCA61.mb.16              | SGB_420 | 175 | 3076604 | 28321  | 8099   |
| Sample_SPC41.mb.40              | SGB_687 | 20  | 1783192 | 126920 | 61304  |
| Sample_SCB58.mb.43              | SGB_100 | 33  | 1163235 | 72446  | 23539  |
| Sample_SPA11.Cluster231cbin.1   | SGB_257 | 64  | 2182278 | 51368  | 17360  |
| Sample_YPB6.mb.12               | SGB_143 | 705 | 2946295 | 4600   | 2374   |
| Sample_SPB35.mb.85cbin.1        | SGB_92  | 19  | 1188476 | 141095 | 39875  |



|                                 |         |     |         |        |        |
|---------------------------------|---------|-----|---------|--------|--------|
| Sample_SPA07.Cluster10244       | SGB_113 | 82  | 1595473 | 27677  | 9216   |
| Sample_SPA34.mb.104             | SGB_271 | 67  | 2074494 | 40905  | 18337  |
| Sample_SPA06.Cluster5434        | SGB_533 | 34  | 4196315 | 179583 | 58340  |
| Sample_SCA70.mb.70cbin.1        | SGB_464 | 88  | 3254323 | 53735  | 21966  |
| Sample_SPA30.mb.27              | SGB_345 | 64  | 2582096 | 63082  | 23533  |
| Sample_YPB1.mb.17cbin.1         | SGB_588 | 108 | 3643269 | 52834  | 17389  |
| Sample_LCB13.mb.71              | SGB_264 | 88  | 2002002 | 30489  | 11030  |
| Sample_YPA1.mb.7                | SGB_200 | 45  | 2358071 | 79325  | 25077  |
| Sample_LPA03.Cluster907cbin.1   | SGB_479 | 61  | 4064562 | 124555 | 34436  |
| Sample_SPA11.Cluster12075cbin.1 | SGB_139 | 208 | 2831782 | 21403  | 6215   |
| Sample_SCB64.Cluster3178cbin.1  | SGB_63  | 95  | 2525576 | 41189  | 12814  |
| Sample_SPA26.Cluster2008cbin.1  | SGB_585 | 338 | 2313632 | 8368   | 3358   |
| Sample_YPB2.mb.83               | SGB_440 | 42  | 2668258 | 87814  | 36566  |
| Sample_SCA70.mb.116             | SGB_206 | 87  | 1794964 | 31905  | 10088  |
| Sample_SCA69.mb.54              | SGB_253 | 41  | 2071164 | 86079  | 30859  |
| Sample_SCB65.mb.4cbin.1         | SGB_534 | 658 | 5141288 | 10224  | 3787   |
| Sample_LCA10.Cluster26cbin.1    | SGB_225 | 281 | 1986601 | 8375   | 3597   |
| Sample_SPA41.Cluster6557cbin.1  | SGB_499 | 18  | 1688546 | 248209 | 62314  |
| Sample_YPB1.mb.77               | SGB_399 | 306 | 4635425 | 34158  | 5348   |
| Sample_SPC32.Cluster5660cbin.1  | SGB_324 | 21  | 2181677 | 162791 | 108424 |
| Sample_SPA06.mb.136cbin.1       | SGB_578 | 89  | 3237762 | 51212  | 18847  |
| Sample_LPA04.mb.37              | SGB_47  | 93  | 1635647 | 28338  | 9084   |
| Sample_YPC4.mb.7cbin.1          | SGB_251 | 51  | 2112432 | 65994  | 23241  |
| Sample_LCA11.Cluster13155       | SGB_147 | 80  | 3612470 | 81472  | 23547  |
| Sample_SPA06.Cluster6148        | SGB_442 | 24  | 2361202 | 177579 | 51941  |
| Sample_LPA01.Cluster3463cbin.1  | SGB_182 | 49  | 2193194 | 77571  | 22736  |
| Sample_LCA20.Cluster6765        | SGB_333 | 22  | 1918207 | 135599 | 54595  |
| Sample_SPA26.mb.15              | SGB_59  | 28  | 2073637 | 120572 | 36499  |
| Sample_LPB08.Cluster4577cbin.1  | SGB_384 | 82  | 2757817 | 61570  | 16776  |
| Sample_YPA7.Cluster3867cbin.1   | SGB_338 | 16  | 2020786 | 156519 | 100145 |
| Sample_SPC15.mb.80cbin.1        | SGB_576 | 86  | 2877920 | 43793  | 17135  |
| Sample_SPB35.mb.66cbin.1        | SGB_18  | 293 | 2912267 | 13046  | 5004   |
| Sample_SPC34.mb.30              | SGB_67  | 110 | 2118561 | 28010  | 10525  |
| Sample_SPA37.Cluster6932cbin.1  | SGB_382 | 53  | 5500404 | 232233 | 72197  |
| Sample_SPA39.Cluster366         | SGB_39  | 31  | 2454915 | 97883  | 36075  |
| Sample_YPB5.mb.9                | SGB_444 | 65  | 3025331 | 115216 | 37294  |
| Sample_LCA20.mb.55              | SGB_25  | 44  | 5042511 | 229737 | 52724  |
| Sample_LCC19.Cluster32          | SGB_27  | 74  | 5556779 | 146518 | 35963  |
| Sample_SPB22.Cluster9389        | SGB_76  | 34  | 1486387 | 69807  | 19263  |
| Sample_LPA04.Cluster8097cbin.1  | SGB_388 | 178 | 3757709 | 50020  | 8709   |
| Sample_SPC32.mb.23              | SGB_326 | 32  | 2079869 | 104957 | 28216  |
| Sample_LPC04.mb.99              | SGB_490 | 224 | 2142352 | 12753  | 4746   |
| Sample_SPA16.mb.39cbin.1        | SGB_374 | 51  | 2954212 | 81881  | 37331  |
| Sample_SPA22.mb.36              | SGB_163 | 62  | 2077862 | 54920  | 17413  |
| Sample_LCC14.mb.37              | SGB_229 | 53  | 2610633 | 75898  | 23968  |
| Sample_SPA39.mb.96              | SGB_621 | 82  | 3091925 | 63449  | 23392  |
| Sample_SPA13.mb.29              | SGB_672 | 58  | 3908526 | 149370 | 38479  |
| Sample_SPA38.Cluster3464        | SGB_552 | 23  | 2868338 | 203576 | 59341  |
| Sample_SPA08.Cluster6153        | SGB_550 | 10  | 2374613 | 349055 | 95938  |
| Sample_LCC11.mb.52              | SGB_252 | 48  | 1860481 | 74942  | 19870  |
| Sample_LPB03.mb.74              | SGB_94  | 41  | 1393834 | 52101  | 19466  |
| Sample_LPC05.mb.69cbin.1        | SGB_54  | 54  | 2032967 | 60352  | 17434  |
| Sample_SPC12.mb.53              | SGB_537 | 70  | 3051418 | 66004  | 24377  |
| Sample_SPC37.mb.39cbin.1        | SGB_513 | 347 | 2319839 | 8893   | 2970   |
| Sample_SPA07.mb.62              | SGB_145 | 130 | 2353384 | 27111  | 8981   |
| Sample_SPC08.mb.56              | SGB_168 | 305 | 1616308 | 6184   | 2709   |
| Sample_LCC13.mb.20cbin.1        | SGB_391 | 100 | 2852337 | 51169  | 19420  |
| Sample_LCB11.mb.45              | SGB_238 | 50  | 1788916 | 59772  | 20089  |

|                                 |         |     |         |        |        |
|---------------------------------|---------|-----|---------|--------|--------|
| Sample_LCA17.mb.24              | SGB_618 | 53  | 2957054 | 90369  | 36092  |
| Sample_LCA12.mb.95              | SGB_210 | 35  | 2285778 | 100173 | 38877  |
| Sample_SPA35.mb.102cbin.1       | SGB_433 | 57  | 2722622 | 80266  | 23357  |
| Sample_LPB05.mb.47              | SGB_661 | 71  | 2140419 | 43244  | 17247  |
| Sample_SPB32.Cluster4022cbin.1  | SGB_23  | 306 | 1500434 | 5912   | 2633   |
| Sample_LPC04.mb.101cbin.1       | SGB_15  | 133 | 2204451 | 25324  | 7638   |
| Sample_SPC30.mb.43cbin.1        | SGB_272 | 89  | 2383740 | 44227  | 14298  |
| Sample_YPC3.mb.23               | SGB_448 | 305 | 3292325 | 16021  | 4621   |
| Sample_SCB60.mb.57              | SGB_242 | 76  | 2065863 | 36327  | 14593  |
| Sample_SPB35.mb.29              | SGB_99  | 72  | 1182743 | 37057  | 6125   |
| Sample_SCA67.mb.90              | SGB_284 | 57  | 2111722 | 62630  | 20986  |
| Sample_SCA58.Cluster4693        | SGB_631 | 8   | 1719666 | 328091 | 106330 |
| Sample_SPB12.mb.23              | SGB_409 | 25  | 2786119 | 204061 | 53645  |
| Sample_LCA10.Cluster1830cbin.1  | SGB_142 | 240 | 3703031 | 24887  | 7155   |
| Sample_SPA22.Cluster19293cbin.1 | SGB_524 | 28  | 1843180 | 142830 | 33584  |
| Sample_LPC04.mb.32              | SGB_318 | 37  | 2762812 | 105606 | 41134  |
| Sample_SPA28.Cluster3006cbin.1  | SGB_574 | 29  | 2865127 | 141255 | 44200  |
| Sample_YPB7.Cluster3668cbin.1   | SGB_258 | 55  | 2386872 | 86985  | 27438  |
| Sample_YPC3.mb.16               | SGB_268 | 88  | 2767848 | 53862  | 15986  |
| Sample_SPA13.mb.12              | SGB_169 | 60  | 2237955 | 106436 | 19236  |
| Sample_SPB42.Cluster8875cbin.1  | SGB_128 | 137 | 2769590 | 33237  | 9451   |
| Sample_YPC1.Cluster10cbin.1     | SGB_197 | 65  | 2186401 | 49124  | 18382  |
| Sample_SPA37.mb.113             | SGB_88  | 18  | 1234695 | 135499 | 44350  |
| Sample_SPA41.Cluster7247        | SGB_608 | 35  | 4972160 | 273843 | 76580  |
| Sample_YPB2.Cluster9399cbin.1   | SGB_437 | 28  | 2606803 | 138548 | 59625  |
| Sample_SPB06.Cluster6571cbin.1  | SGB_567 | 103 | 5364619 | 83932  | 24582  |
| Sample_SPA25.mb.46cbin.1        | SGB_519 | 203 | 3242802 | 25397  | 7026   |
| Sample_YPB2.mb.32cbin.1         | SGB_383 | 45  | 3093258 | 129659 | 33830  |
| Sample_SCA70.Cluster4600cbin.1  | SGB_205 | 52  | 2892041 | 105697 | 26995  |
| Sample_SPB16.mb.47              | SGB_156 | 37  | 1456494 | 58609  | 20479  |
| Sample_LPC02.mb.23              | SGB_234 | 59  | 1967808 | 47144  | 16790  |
| Sample_SPC26.Cluster3107        | SGB_75  | 35  | 2219270 | 84740  | 27686  |
| Sample_SPC39.Cluster1686cbin.1  | SGB_546 | 51  | 2230974 | 68993  | 22494  |
| Sample_YPC3.mb.3                | SGB_121 | 11  | 1809315 | 325310 | 85856  |
| Sample_SPA15.mb.71              | SGB_322 | 60  | 2092438 | 67126  | 17939  |
| Sample_SPA11.mb.62              | SGB_115 | 113 | 1949820 | 29941  | 8110   |
| Sample_LPC02.mb.80cbin.1        | SGB_296 | 112 | 2403694 | 33559  | 10038  |
| Sample_SCC61.mb.41cbin.1        | SGB_599 | 213 | 4249544 | 35684  | 8681   |
| Sample_SPB39.mb.102             | SGB_558 | 97  | 2058737 | 31225  | 10827  |
| Sample_SPB39.mb.15cbin.1        | SGB_371 | 213 | 2672006 | 24098  | 4771   |
| Sample_SPC22.mb.86cbin.1        | SGB_130 | 36  | 2662997 | 155045 | 44596  |
| Sample_SPA21.mb.76              | SGB_635 | 122 | 2677538 | 36625  | 9996   |
| Sample_LCA21.mb.13              | SGB_419 | 120 | 3157133 | 43020  | 14943  |
| Sample_SPA38.mb.91              | SGB_573 | 79  | 4265340 | 146273 | 24363  |
| Sample_SPB08.mb.5               | SGB_482 | 125 | 2960042 | 39674  | 10652  |
| Sample_SPA35.mb.49              | SGB_270 | 96  | 2448756 | 47967  | 12794  |
| Sample_SCB65.mb.65cbin.1        | SGB_606 | 59  | 5922940 | 174079 | 65975  |
| Sample_SPA31.mb.7cbin.1         | SGB_141 | 151 | 3090226 | 39578  | 9507   |
| Sample_SPC17.Cluster2305        | SGB_135 | 116 | 4407976 | 60957  | 17342  |
| Sample_LCA12.mb.49              | SGB_510 | 87  | 1762286 | 33744  | 9381   |
| Sample_LCC17.mb.120             | SGB_312 | 49  | 2455685 | 81530  | 25218  |
| Sample_YPC6.Cluster7961         | SGB_344 | 34  | 2069021 | 91069  | 26173  |
| Sample_YPC4.Cluster4622cbin.1   | SGB_580 | 47  | 3534520 | 116576 | 48825  |
| Sample_SPB45.mb.80cbin.1        | SGB_247 | 79  | 1837146 | 38829  | 10108  |
| Sample_YPB7.mb.65cbin.1         | SGB_33  | 54  | 4514568 | 118099 | 39214  |
| Sample_SPB25.mb.26              | SGB_218 | 39  | 3060127 | 139133 | 34461  |
| Sample_LPB02.mb.26cbin.1        | SGB_460 | 131 | 2563012 | 33031  | 10570  |

|                                 |         |     |         |        |        |
|---------------------------------|---------|-----|---------|--------|--------|
| Sample_LCB23.Cluster597cbin.1   | SGB_255 | 113 | 2921785 | 57418  | 9971   |
| Sample_SPA12.mb.95              | SGB_306 | 237 | 2069009 | 11583  | 4303   |
| Sample_SPA21.Cluster125cbin.1   | SGB_316 | 63  | 3845425 | 105649 | 31899  |
| Sample_LPC03.Cluster5010cbin.1  | SGB_541 | 14  | 2578641 | 268193 | 123403 |
| Sample_SCA65.mb.10              | SGB_665 | 86  | 2051640 | 42222  | 13150  |
| Sample_YPA6.Cluster5179cbin.1   | SGB_515 | 59  | 2207385 | 57740  | 17383  |
| Sample_LCB19.mb.1               | SGB_611 | 150 | 4034019 | 49334  | 12529  |
| Sample_SPC22.Cluster184         | SGB_220 | 45  | 2383507 | 76000  | 24338  |
| Sample_LCB25.mb.2cbin.1         | SGB_70  | 68  | 2589349 | 53025  | 19603  |
| Sample_LCB14.Cluster4494        | SGB_158 | 25  | 2831525 | 187541 | 62168  |
| Sample_SPC27.Cluster6911        | SGB_373 | 31  | 2793540 | 132554 | 50134  |
| Sample_SPA15.mb.81              | SGB_216 | 226 | 2238760 | 14279  | 4939   |
| Sample_SPB42.Cluster17197cbin.1 | SGB_684 | 134 | 4341667 | 60858  | 17450  |
| Sample_SPA15.Cluster10540cbin.1 | SGB_609 | 102 | 4991493 | 107193 | 25044  |
| Sample_SCC64.mb.47cbin.1        | SGB_368 | 126 | 3626557 | 54946  | 14049  |
| Sample_LCB22.mb.50cbin.1        | SGB_237 | 44  | 2195657 | 101268 | 20791  |
| Sample_YPC1.mb.49               | SGB_232 | 145 | 3440932 | 37576  | 12265  |
| Sample_SPA26.mb.78              | SGB_313 | 27  | 1861059 | 122667 | 40081  |
| Sample_LPA01.Cluster90cbin.1    | SGB_222 | 39  | 2984495 | 139335 | 52207  |
| Sample_SPB22.mb.88              | SGB_102 | 19  | 1265673 | 134723 | 40689  |
| Sample_SPB27.Cluster2220        | SGB_380 | 48  | 7025057 | 193235 | 96256  |
| Sample_SPC12.mb.56cbin.1        | SGB_686 | 116 | 1875474 | 25568  | 8435   |
| Sample_LCC09.Cluster6301cbin.1  | SGB_565 | 68  | 4481218 | 100817 | 39265  |
| Sample_SPA32.mb.13              | SGB_361 | 80  | 2580181 | 45164  | 16515  |
| Sample_SPA08.Cluster8154        | SGB_634 | 8   | 1843477 | 296366 | 189265 |
| Sample_SPA36.Cluster12603       | SGB_111 | 11  | 1685675 | 306479 | 61861  |
| Sample_LCB10.mb.44cbin.1        | SGB_125 | 67  | 2078042 | 44896  | 14033  |
| Sample_LCC12.mb.99              | SGB_263 | 108 | 2533175 | 36580  | 12500  |
| Sample_YPB1.Cluster198cbin.1    | SGB_189 | 228 | 2266106 | 14032  | 4494   |
| Sample_SCC70.mb.102             | SGB_398 | 169 | 2677249 | 24346  | 7985   |
| Sample_LPB05.Cluster4298cbin.1  | SGB_2   | 28  | 2941868 | 127223 | 60826  |
| Sample_SPC15.mb.26cbin.1        | SGB_503 | 73  | 1793647 | 39517  | 11524  |
| Sample_LPA04.mb.52cbin.1        | SGB_497 | 16  | 1872101 | 248839 | 69702  |
| Sample_SPB03.mb.4               | SGB_439 | 99  | 2972480 | 66445  | 13138  |
| Sample_LPB08.Cluster5246cbin.1  | SGB_347 | 62  | 2889446 | 77340  | 21517  |
| Sample_SPB26.mb.88              | SGB_17  | 568 | 4289306 | 9660   | 3716   |
| Sample_SCC69.mb.60              | SGB_453 | 70  | 3266613 | 84225  | 26437  |
| Sample_SCC69.Cluster1876        | SGB_74  | 32  | 2170438 | 109439 | 35082  |
| Sample_SPB36.mb.9cbin.1         | SGB_321 | 38  | 2111525 | 95811  | 24129  |
| Sample_SPB13.Cluster946         | SGB_43  | 33  | 2394022 | 101610 | 35009  |
| Sample_SPB30.mb.72              | SGB_116 | 33  | 1955979 | 85236  | 40072  |
| Sample_SPB41.Cluster11656       | SGB_652 | 45  | 1579723 | 45236  | 18184  |
| Sample_LPC04.mb.111             | SGB_489 | 61  | 2214337 | 61468  | 18121  |
| Sample_SPC04.Cluster5731cbin.1  | SGB_186 | 343 | 2151617 | 7682   | 2892   |
| Sample_SCA68.Cluster215cbin.1   | SGB_294 | 64  | 2201846 | 79211  | 13854  |
| Sample_LCA22.mb.29              | SGB_240 | 37  | 2088623 | 75294  | 28329  |
| Sample_LPA08.mb.37              | SGB_146 | 82  | 2678454 | 48443  | 16385  |
| Sample_SCC60.Cluster12028       | SGB_411 | 23  | 2472923 | 127423 | 63888  |
| Sample_SPB47.mb.14              | SGB_38  | 55  | 2471398 | 82520  | 21727  |
| Sample_SPC13.Cluster8354        | SGB_468 | 70  | 2186718 | 61716  | 14226  |
| Sample_SPA30.mb.100             | SGB_277 | 21  | 2017670 | 177617 | 39299  |
| Sample_SPC12.Cluster2893cbin.1  | SGB_538 | 23  | 2121579 | 184726 | 43015  |
| Sample_SPA25.mb.23cbin.1        | SGB_401 | 169 | 6704437 | 72048  | 20885  |
| Sample_LCC17.Cluster16446       | SGB_80  | 21  | 1048374 | 58879  | 25540  |
| Sample_SPA17.Cluster6508        | SGB_55  | 72  | 3386714 | 79675  | 26442  |
| Sample_LCA13.mb.86              | SGB_167 | 45  | 2312046 | 79376  | 30459  |
| Sample_SPA25.Cluster5997        | SGB_632 | 22  | 1940661 | 143482 | 47476  |
| Sample_SPB37.mb.4cbin.1         | SGB_532 | 50  | 4160518 | 150216 | 51090  |

|                                 |         |     |         |        |       |
|---------------------------------|---------|-----|---------|--------|-------|
| Sample_SPB10.mb.73              | SGB_226 | 208 | 1855234 | 12839  | 4015  |
| Sample_SPB45.mb.39cbin.1        | SGB_280 | 221 | 2461925 | 15999  | 4968  |
| Sample_LCA25.mb.26              | SGB_369 | 78  | 3565096 | 90930  | 21631 |
| Sample_LPC04.mb.91cbin.1        | SGB_212 | 43  | 2522894 | 75485  | 37195 |
| Sample_LCB20.Cluster9862        | SGB_104 | 11  | 1134637 | 223391 | 67128 |
| Sample_YPA1.Cluster642cbin.1    | SGB_602 | 51  | 5711805 | 204710 | 49540 |
| Sample_SCA64.Cluster336         | SGB_3   | 35  | 3119347 | 185474 | 42521 |
| Sample_LPB03.mb.40              | SGB_455 | 300 | 2585384 | 11498  | 4095  |
| Sample_SPA31.Cluster110         | SGB_20  | 104 | 2423573 | 39552  | 9560  |
| Sample_SPB12.mb.52              | SGB_308 | 28  | 2201312 | 97053  | 42533 |
| Sample_LPC08.mb.5               | SGB_101 | 20  | 1463455 | 140182 | 52194 |
| Sample_LCA12.mb.112             | SGB_539 | 20  | 2358159 | 155090 | 61548 |
| Sample_YPC7.mb.27               | SGB_615 | 91  | 4550475 | 103143 | 24992 |
| Sample_SPA08.mb.10              | SGB_109 | 14  | 1400332 | 229447 | 55695 |
| Sample_SPB26.mb.37              | SGB_13  | 97  | 4172617 | 72127  | 20832 |
| Sample_SCB68.Cluster8783cbin.1  | SGB_124 | 39  | 1872763 | 100414 | 21691 |
| Sample_YPC2.mb.66               | SGB_278 | 25  | 1944001 | 147648 | 44788 |
| Sample_SPA39.Cluster2121        | SGB_61  | 37  | 2289189 | 111045 | 26531 |
| Sample_SCB67.Cluster13396cbin.1 | SGB_581 | 97  | 2819522 | 43724  | 15458 |
| Sample_YPB1.Cluster1122cbin.1   | SGB_370 | 45  | 3015152 | 94440  | 31370 |
| Sample_SPC13.mb.49              | SGB_223 | 141 | 2731672 | 33801  | 8439  |
| Sample_SCB70.mb.112             | SGB_423 | 89  | 3438924 | 68208  | 20395 |
| Sample_LPC01.mb.119             | SGB_359 | 102 | 3033591 | 43180  | 13717 |
| Sample_SPC15.mb.22              | SGB_248 | 52  | 1936476 | 53876  | 22829 |
| Sample_SPA07.Cluster99cbin.1    | SGB_276 | 26  | 1989112 | 116865 | 50545 |
| Sample_LPB05.mb.94              | SGB_662 | 230 | 2837737 | 19589  | 5630  |
| Sample_LCC12.mb.117             | SGB_291 | 119 | 1769813 | 25315  | 6873  |
| Sample_LPB05.Cluster12286cbin.1 | SGB_354 | 189 | 3099658 | 30077  | 6550  |
| Sample_YPA3.mb.19cbin.1         | SGB_302 | 85  | 2621196 | 50928  | 14055 |
| Sample_SPB47.Cluster1233cbin.1  | SGB_181 | 86  | 2338461 | 46922  | 14207 |
| Sample_SPA42.mb.53cbin.1        | SGB_304 | 78  | 2203722 | 53731  | 16189 |
| Sample_SPB25.mb.62cbin.1        | SGB_131 | 355 | 3420545 | 15479  | 4401  |
| Sample_SPB25.mb.95cbin.1        | SGB_31  | 162 | 4758027 | 48700  | 13833 |
| Sample_SPA47.mb.6               | SGB_679 | 53  | 4620240 | 122797 | 47064 |
| Sample_SPC42.mb.101cbin.1       | SGB_502 | 34  | 1896417 | 111248 | 23087 |
| Sample_SPC30.Cluster6113cbin.1  | SGB_379 | 100 | 6963900 | 129291 | 39495 |
| Sample_LPB03.Cluster8614cbin.1  | SGB_459 | 329 | 1801825 | 6532   | 2731  |
| Sample_SPA21.mb.70cbin.1        | SGB_236 | 117 | 1820827 | 23531  | 7481  |
| Sample_LCA23.mb.4cbin.1         | SGB_37  | 85  | 2609997 | 47402  | 14046 |
| Sample_SPB45.Cluster12822       | SGB_85  | 21  | 969526  | 78572  | 19960 |
| Sample_LPB05.Cluster3708cbin.1  | SGB_307 | 24  | 2327367 | 205757 | 49338 |
| Sample_YPC6.mb.9                | SGB_607 | 70  | 5312946 | 130438 | 51218 |
| Sample_LPB04.mb.33              | SGB_545 | 152 | 3082185 | 30823  | 9857  |
| Sample_LPC05.Cluster9183        | SGB_397 | 26  | 2276256 | 171888 | 51447 |
| Sample_SPA17.mb.79              | SGB_230 | 205 | 1812548 | 11367  | 4273  |
| Sample_SPB26.mb.16              | SGB_555 | 73  | 2119015 | 47638  | 15620 |
| Sample_SPC42.Cluster10367cbin.1 | SGB_358 | 50  | 3057102 | 131663 | 44565 |
| Sample_YPA7.mb.67               | SGB_367 | 163 | 4150807 | 50911  | 10558 |
| Sample_SPA10.mb.48              | SGB_389 | 147 | 2523366 | 25737  | 8133  |
| Sample_SCA55.mb.44              | SGB_651 | 15  | 1776570 | 169592 | 52208 |
| Sample_SPB25.mb.74              | SGB_404 | 118 | 1845048 | 28277  | 7270  |
| Sample_SPC41.mb.28              | SGB_166 | 122 | 2892358 | 38083  | 11044 |
| Sample_SPB27.Cluster1327        | SGB_341 | 20  | 2332374 | 136896 | 86553 |
| Sample_SPA13.mb.24              | SGB_447 | 107 | 3153857 | 48677  | 15732 |
| Sample_SPB09.Cluster7564cbin.1  | SGB_378 | 95  | 3484331 | 66462  | 21532 |
| Sample_SPB15.mb.67              | SGB_474 | 222 | 1749994 | 10204  | 3929  |
| Sample_SCA58.mb.77              | SGB_625 | 56  | 1818609 | 47400  | 21284 |

|                                 |         |     |         |        |        |
|---------------------------------|---------|-----|---------|--------|--------|
| Sample_SPB12.Cluster197         | SGB_35  | 62  | 2338404 | 68391  | 16844  |
| Sample_SPB45.Cluster4014cbin.1  | SGB_530 | 66  | 3583945 | 75612  | 28132  |
| Sample_LPC05.mb.95cbin.1        | SGB_287 | 40  | 2352355 | 95294  | 31038  |
| Sample_LCA16.Cluster1219        | SGB_16  | 363 | 4205078 | 16887  | 5773   |
| Sample_SPB20.mb.3               | SGB_78  | 25  | 1663990 | 165171 | 51390  |
| Sample_LCA10.Cluster54          | SGB_641 | 17  | 2307108 | 268425 | 60067  |
| Sample_SPB16.Cluster975cbin.1   | SGB_45  | 113 | 2015373 | 26558  | 7720   |
| Sample_SPB42.mb.19cbin.1        | SGB_28  | 357 | 5117098 | 24029  | 5905   |
| Sample_SPC17.mb.1cbin.1         | SGB_405 | 35  | 2653461 | 161084 | 45220  |
| Sample_SPC41.mb.23              | SGB_511 | 84  | 1310247 | 25408  | 7385   |
| Sample_SPB25.mb.77              | SGB_133 | 82  | 3087238 | 102139 | 14137  |
| Sample_SPB34.Cluster2430cbin.1  | SGB_402 | 406 | 7078483 | 28913  | 8883   |
| Sample_LCC20.mb.21              | SGB_457 | 26  | 2620320 | 160795 | 46973  |
| Sample_SPC42.mb.7cbin.1         | SGB_593 | 144 | 2438682 | 24341  | 9505   |
| Sample_LCA13.mb.9cbin.1         | SGB_564 | 67  | 4256297 | 113950 | 28522  |
| Sample_SPA39.mb.30cbin.1        | SGB_675 | 25  | 2388844 | 140483 | 63645  |
| Sample_LCC14.mb.83              | SGB_122 | 9   | 1861909 | 509809 | 104858 |
| Sample_SPC41.mb.69              | SGB_476 | 135 | 1971882 | 26498  | 5838   |
| Sample_SPB32.mb.29              | SGB_470 | 70  | 2623114 | 65602  | 23121  |
| Sample_LPB02.Cluster10625cbin.1 | SGB_180 | 44  | 2173839 | 159676 | 28527  |
| Sample_SPC25.mb.23cbin.1        | SGB_591 | 141 | 2583734 | 26701  | 8841   |
| Sample_SCB70.mb.16              | SGB_350 | 272 | 2080064 | 9880   | 3628   |
| Sample_SPB26.Cluster96          | SGB_518 | 59  | 2662176 | 78434  | 19689  |
| Sample_SPB45.mb.76cbin.1        | SGB_286 | 34  | 2194883 | 190010 | 30132  |
| Sample_SPC41.mb.95cbin.1        | SGB_259 | 164 | 2742663 | 23992  | 8173   |
| Sample_LCC16.Cluster2870cbin.1  | SGB_446 | 102 | 3767556 | 58941  | 18063  |
| Sample_LPC04.mb.90              | SGB_481 | 79  | 2640543 | 58839  | 18330  |
| Sample_SPC35.mb.109cbin.1       | SGB_93  | 16  | 1295659 | 115425 | 44237  |
| Sample_SPB22.mb.74              | SGB_215 | 37  | 1961084 | 73382  | 28237  |
| Sample_SPB30.mb.27cbin.1        | SGB_517 | 120 | 2427290 | 28417  | 10871  |
| Sample_YPA4.mb.1                | SGB_689 | 207 | 1813807 | 12597  | 3864   |
| Sample_YPB5.Cluster2663cbin.1   | SGB_595 | 352 | 2736133 | 10183  | 3519   |
| Sample_LPB04.Cluster6113        | SGB_176 | 23  | 2311880 | 144604 | 52966  |
| Sample_SPC17.mb.74cbin.1        | SGB_194 | 67  | 2462355 | 64090  | 21356  |
| Sample_SPA06.Cluster317cbin.1   | SGB_246 | 79  | 2129530 | 40070  | 15529  |
| Sample_SPA35.mb.47              | SGB_512 | 22  | 1701670 | 129867 | 45752  |
| Sample_SPA47.mb.102             | SGB_678 | 101 | 1825175 | 31087  | 7774   |
| Sample_LCC14.mb.50cbin.1        | SGB_362 | 598 | 3972058 | 8806   | 3151   |
| Sample_LPC04.mb.20              | SGB_663 | 227 | 2431694 | 15163  | 4646   |
| Sample_SPC45.Cluster13128cbin.1 | SGB_173 | 105 | 2107173 | 30498  | 9682   |
| Sample_SPC11.mb.95cbin.1        | SGB_542 | 219 | 2270058 | 15073  | 4886   |
| Sample_LPA04.mb.23              | SGB_660 | 109 | 2206631 | 30586  | 11418  |
| Sample_YPC6.mb.67               | SGB_390 | 75  | 2663925 | 64973  | 19927  |
| Sample_SPB28.mb.65              | SGB_22  | 67  | 1875575 | 49308  | 14620  |
| Sample_LPB08.mb.16              | SGB_372 | 52  | 2791785 | 132194 | 27620  |
| Sample_YPB1.mb.59cbin.1         | SGB_196 | 116 | 2834807 | 55483  | 12934  |
| Sample_SPA16.mb.2cbin.1         | SGB_136 | 86  | 2674383 | 46670  | 15427  |
| Sample_SCB67.Cluster1428        | SGB_668 | 22  | 2511719 | 141760 | 73857  |
| Sample_LCA12.mb.79cbin.1        | SGB_589 | 42  | 3592439 | 141886 | 48512  |
| Sample_LCA11.mb.105cbin.1       | SGB_617 | 72  | 4499374 | 117272 | 34399  |
| Sample_SPA17.mb.78cbin.1        | SGB_418 | 41  | 2633730 | 95376  | 35760  |
| Sample_SPA22.mb.91              | SGB_155 | 49  | 1359696 | 51840  | 9728   |
| Sample_LCC22.Cluster6998        | SGB_331 | 9   | 1750722 | 479723 | 56377  |
| Sample_SPC17.mb.37              | SGB_469 | 30  | 1952141 | 93867  | 31511  |
| Sample_LCC14.Cluster994         | SGB_127 | 61  | 1800233 | 45338  | 14291  |
| Sample_SPC16.Cluster3365        | SGB_72  | 31  | 2419140 | 113579 | 37967  |

|                                |         |     |         |        |       |
|--------------------------------|---------|-----|---------|--------|-------|
| Sample_YPB2.Cluster947         | SGB_690 | 33  | 5173266 | 278233 | 62766 |
| Sample_SPB10.mb.77             | SGB_463 | 61  | 3003496 | 115718 | 35181 |
| Sample_SPB22.mb.47             | SGB_174 | 198 | 2288233 | 16191  | 5519  |
| Sample_LPC05.Cluster4101cbin.1 | SGB_613 | 130 | 3318434 | 41200  | 12432 |
| Sample_SPC15.Cluster5521cbin.1 | SGB_571 | 23  | 2247102 | 141132 | 48313 |
| Sample_SPC39.Cluster5880cbin.1 | SGB_66  | 91  | 2000862 | 32107  | 9778  |
| Sample_LCA14.Cluster1346       | SGB_505 | 16  | 2420397 | 315366 | 73307 |
| Sample_SPC08.mb.54             | SGB_149 | 59  | 1818150 | 55047  | 13964 |
| Sample_SPC22.mb.12             | SGB_219 | 64  | 2860698 | 80712  | 21029 |
| Sample_LCA16.Cluster3119cbin.1 | SGB_566 | 376 | 4066686 | 14575  | 5327  |
| Sample_SCA60.Cluster874        | SGB_638 | 20  | 2187569 | 146638 | 56473 |
| Sample_SPC35.mb.31             | SGB_650 | 32  | 1717914 | 83759  | 32925 |
| Sample_LCB23.Cluster647cbin.1  | SGB_559 | 61  | 2691326 | 58120  | 23992 |
| Sample_SPC42.mb.68             | SGB_357 | 39  | 2745765 | 104881 | 47750 |
| Sample_SCC68.mb.59cbin.1       | SGB_256 | 147 | 3608615 | 68120  | 11103 |
| Sample_SPB31.mb.4              | SGB_281 | 42  | 2039356 | 79228  | 20387 |
| Sample_LPC04.mb.30             | SGB_480 | 355 | 3192611 | 11946  | 4063  |
| Sample_SCC67.mb.105cbin.1      | SGB_583 | 67  | 2573801 | 52430  | 18765 |
| Sample_LCA10.Cluster2071cbin.1 | SGB_126 | 21  | 2090005 | 195396 | 52323 |
| Sample_SPB25.Cluster6772       | SGB_431 | 98  | 2337580 | 32023  | 12871 |
| Sample_LCA16.Cluster252cbin.1  | SGB_10  | 77  | 5033228 | 102925 | 31816 |
| Sample_SCA65.mb.82             | SGB_540 | 155 | 2145927 | 19701  | 6799  |
| Sample_SCC59.mb.71cbin.1       | SGB_140 | 160 | 4344464 | 39610  | 12965 |
| Sample_SPC11.mb.136            | SGB_454 | 130 | 2956248 | 48239  | 8420  |
| Sample_SCB59.mb.94cbin.1       | SGB_667 | 82  | 1688736 | 30930  | 10296 |
| Sample_YPA1.mb.5               | SGB_417 | 591 | 4151092 | 8946   | 3392  |
| Sample_LPB02.mb.67             | SGB_366 | 134 | 2581119 | 36887  | 8714  |
| Sample_SPA13.mb.3              | SGB_172 | 121 | 3097449 | 36628  | 14379 |
| Sample_SPB45.mb.45             | SGB_487 | 479 | 2420508 | 5695   | 2705  |
| Sample_SPC35.mb.4cbin.1        | SGB_424 | 27  | 2668061 | 193910 | 62843 |
| Sample_SPB30.mb.68             | SGB_343 | 389 | 1818561 | 5229   | 2635  |
| Sample_SCB69.mb.72             | SGB_669 | 173 | 2343910 | 17897  | 7031  |
| Sample_LCB20.mb.30             | SGB_531 | 70  | 4231455 | 130825 | 30587 |
| Sample_SCC65.mb.28             | SGB_42  | 139 | 2613848 | 28861  | 8905  |
| Sample_SPC35.mb.113cbin.1      | SGB_493 | 35  | 1692104 | 74919  | 28759 |
| Sample_LCB10.mb.120cbin.1      | SGB_68  | 69  | 1722237 | 54195  | 9729  |
| Sample_LPC02.mb.70cbin.1       | SGB_292 | 30  | 1992037 | 129559 | 36629 |
| Sample_YPC5.mb.51cbin.1        | SGB_65  | 109 | 2342417 | 42432  | 8396  |
| Sample_LPC04.Cluster1402cbin.1 | SGB_19  | 38  | 2727673 | 137420 | 35111 |
| Sample_SPB25.mb.82cbin.1       | SGB_120 | 141 | 2092994 | 32385  | 5701  |
| Sample_SPC27.mb.93             | SGB_429 | 59  | 2674281 | 67428  | 22297 |
| Sample_LCC25.mb.5cbin.1        | SGB_643 | 19  | 2425739 | 236859 | 80532 |
| Sample_SPB35.mb.17cbin.1       | SGB_243 | 98  | 2589666 | 37036  | 14956 |
| Sample_SPB36.mb.51             | SGB_83  | 21  | 1348553 | 77015  | 37928 |
| Sample_SPB37.mb.18             | SGB_165 | 39  | 2047830 | 94158  | 29967 |
| Sample_SPA41.mb.28             | SGB_436 | 36  | 2576667 | 98841  | 40972 |
| Sample_YPC6.mb.50              | SGB_536 | 57  | 4758912 | 141658 | 40064 |
| Sample_SPB21.mb.78cbin.1       | SGB_548 | 53  | 3016675 | 152166 | 25362 |
| Sample_SPA47.Cluster8125cbin.1 | SGB_53  | 28  | 1910820 | 118005 | 34735 |
| Sample_SPB35.mb.47             | SGB_82  | 45  | 1287146 | 42183  | 14530 |
| Sample_SPB26.Cluster12694      | SGB_653 | 92  | 1573727 | 29270  | 7039  |
| Sample_LCB10.Cluster2330cbin.1 | SGB_340 | 18  | 2276375 | 205067 | 61970 |
| Sample_SPA35.mb.50             | SGB_484 | 410 | 2417858 | 7136   | 3091  |
| Sample_SCB67.mb.142            | SGB_267 | 57  | 2191413 | 75072  | 19810 |
| Sample_SPA35.mb.46             | SGB_478 | 443 | 2937177 | 8275   | 3361  |
| Sample_SPA35.mb.22             | SGB_495 | 33  | 1757649 | 114940 | 23671 |
| Sample_SPA03.Cluster8475cbin.1 | SGB_412 | 22  | 2879040 | 173059 | 77582 |
| Sample_YPC1.Cluster660cbin.1   | SGB_41  | 80  | 2138818 | 44904  | 12407 |

|                                 |         |     |         |        |        |
|---------------------------------|---------|-----|---------|--------|--------|
| Sample_SPA47.Cluster903         | SGB_44  | 22  | 2402758 | 224146 | 47311  |
| Sample_SCB64.mb.105cbin.1       | SGB_309 | 35  | 2131009 | 108547 | 23769  |
| Sample_SPC27.mb.85              | SGB_114 | 85  | 1978587 | 40652  | 11607  |
| Sample_YPA3.Cluster1349         | SGB_342 | 95  | 2621366 | 53645  | 17805  |
| Sample_SPB47.Cluster48cbin.1    | SGB_227 | 44  | 2573394 | 131440 | 27175  |
| Sample_SPA16.mb.99cbin.1        | SGB_673 | 217 | 3810275 | 27744  | 7876   |
| Sample_SPC30.mb.56cbin.1        | SGB_456 | 197 | 2850275 | 20821  | 6435   |
| Sample_SPC39.Cluster776cbin.1   | SGB_8   | 61  | 2456407 | 61434  | 18912  |
| Sample_SPC45.mb.91              | SGB_688 | 121 | 1961052 | 21407  | 8656   |
| Sample_SPC08.mb.41              | SGB_685 | 386 | 4569273 | 17004  | 5569   |
| Sample_LPB05.mb.82              | SGB_231 | 70  | 2758924 | 78100  | 20208  |
| Sample_SPC35.mb.92              | SGB_103 | 24  | 1214906 | 69716  | 34700  |
| Sample_LCB11.Cluster7542cbin.1  | SGB_413 | 69  | 2739724 | 64046  | 18732  |
| Sample_LPC03.Cluster4989cbin.1  | SGB_590 | 44  | 3165168 | 118556 | 40877  |
| Sample_SCA64.mb.33              | SGB_214 | 44  | 2344695 | 101972 | 26748  |
| Sample_SPB25.Cluster13262cbin.1 | SGB_148 | 114 | 2289779 | 26748  | 10579  |
| Sample_SPA34.Cluster1818        | SGB_26  | 28  | 5674361 | 222287 | 140879 |
| Sample_SPC17.Cluster1240        | SGB_132 | 152 | 2161345 | 21900  | 6240   |
| Sample_SPC07.mb.71              | SGB_610 | 100 | 3995957 | 62542  | 22380  |
| Sample_SCA70.Cluster572cbin.1   | SGB_274 | 143 | 2672085 | 32983  | 8737   |
| Sample_LCA12.mb.139cbin.1       | SGB_89  | 27  | 1163787 | 112841 | 18857  |
| Sample_SCC70.mb.49              | SGB_671 | 11  | 1561856 | 247093 | 122471 |
| Sample_SPC08.Cluster9827cbin.1  | SGB_587 | 85  | 3339606 | 60593  | 20887  |
| Sample_YPC1.Cluster479cbin.1    | SGB_428 | 57  | 2926833 | 72697  | 27315  |
| Sample_SPA21.mb.75cbin.1        | SGB_250 | 76  | 2031201 | 44394  | 13250  |
| Sample_SCC70.mb.71              | SGB_217 | 80  | 1919995 | 33958  | 12501  |
| Sample_SPC45.Cluster1174cbin.1  | SGB_249 | 49  | 2038549 | 63512  | 23600  |
| Sample_LCC17.mb.22              | SGB_551 | 265 | 2185682 | 10137  | 4272   |
| Sample_SPA45.Cluster8060cbin.1  | SGB_620 | 295 | 2425989 | 9673   | 4234   |
| Sample_LCC09.mb.93              | SGB_458 | 89  | 2566091 | 44049  | 16143  |
| Sample_SPA21.mb.114cbin.1       | SGB_604 | 51  | 4942244 | 213652 | 47842  |
| Sample_SPA41.Cluster8883cbin.1  | SGB_112 | 210 | 1757858 | 10958  | 3882   |
| Sample_YPA7.mb.29               | SGB_90  | 51  | 1538709 | 48149  | 12839  |
| Sample_SPC31.Cluster1           | SGB_637 | 25  | 2220875 | 129532 | 46305  |
| Sample_LCB11.mb.55              | SGB_526 | 26  | 2088177 | 116918 | 39648  |
| Sample_SPA32.Cluster5430cbin.1  | SGB_355 | 62  | 2838312 | 78943  | 23126  |
| Sample_SPC32.mb.3cbin.1         | SGB_426 | 66  | 3356855 | 79983  | 27125  |
| Sample_SPA15.mb.13cbin.1        | SGB_535 | 652 | 5952366 | 11952  | 4275   |
| Sample_SPB08.mb.46              | SGB_528 | 98  | 1766822 | 29425  | 8490   |
| Sample_SPB36.mb.67              | SGB_364 | 158 | 2085131 | 21722  | 5646   |
| Sample_SPB07.Cluster283         | SGB_647 | 34  | 1911526 | 83907  | 30279  |
| Sample_SCC68.mb.61              | SGB_262 | 48  | 1881337 | 73656  | 19125  |
| Sample_LPB05.mb.3               | SGB_527 | 93  | 1934074 | 33055  | 10134  |
| Sample_SPB26.Cluster1230cbin.1  | SGB_682 | 18  | 1853734 | 157734 | 76988  |
| Sample_SPA13.Cluster985cbin.1   | SGB_475 | 133 | 1924874 | 25964  | 6384   |
| Sample_SPA27.Cluster135cbin.1   | SGB_195 | 101 | 2779142 | 48499  | 13905  |
| Sample_LPC04.Cluster8345        | SGB_500 | 4   | 1550073 | 388913 | 311056 |
| Sample_SPC13.mb.8               | SGB_332 | 266 | 2736440 | 15166  | 4743   |
| Sample_SPC11.Cluster4048        | SGB_501 | 17  | 2029114 | 137216 | 46739  |
| Sample_SPB25.mb.12              | SGB_681 | 13  | 1685500 | 147385 | 93795  |
| Sample_SPC08.mb.124             | SGB_466 | 290 | 2723013 | 12240  | 4223   |
| Sample_SPC07.Cluster7094        | SGB_71  | 17  | 1981379 | 140490 | 57974  |
| Sample_SPB07.Cluster1836        | SGB_642 | 11  | 2191524 | 473789 | 87970  |
| Sample_SPB07.mb.104             | SGB_188 | 200 | 2541210 | 18142  | 6496   |
| Sample_SPC22.Cluster481         | SGB_627 | 52  | 1971926 | 73239  | 21494  |
| Sample_SPC06.Cluster328cbin.1   | SGB_260 | 119 | 2764307 | 47468  | 9512   |
| Sample_YPC5.mb.73cbin.1         | SGB_451 | 77  | 3035214 | 81008  | 26567  |
| Sample_SPA42.Cluster16495cbin.1 | SGB_138 | 142 | 2263009 | 23100  | 7634   |

|                                 |         |     |         |        |        |
|---------------------------------|---------|-----|---------|--------|--------|
| Sample_SCC67.Cluster8360cbin.1  | SGB_579 | 63  | 2741928 | 67480  | 21154  |
| Sample_LCB21.mb.18cbin.1        | SGB_592 | 55  | 2492854 | 74863  | 22971  |
| Sample_SPC09.Cluster8082cbin.1  | SGB_416 | 62  | 3478642 | 86388  | 32486  |
| Sample_SCA70.mb.103cbin.1       | SGB_235 | 142 | 1961826 | 28009  | 5771   |
| Sample_LPB05.Cluster6861        | SGB_6   | 11  | 2226192 | 309211 | 123745 |
| Sample_SPB34.mb.105             | SGB_683 | 322 | 2804838 | 11513  | 4355   |
| Sample_LPA05.mb.50cbin.1        | SGB_228 | 410 | 3191661 | 10262  | 3897   |
| Sample_YPB1.mb.44cbin.1         | SGB_605 | 98  | 5996150 | 108420 | 31855  |
| Sample_SCC66.mb.109cbin.1       | SGB_177 | 60  | 2927059 | 118919 | 21542  |
| Sample_SPA10.mb.31cbin.1        | SGB_452 | 35  | 2907990 | 169245 | 47862  |
| Sample_SPB32.mb.47              | SGB_351 | 158 | 2775407 | 26678  | 8217   |
| Sample_LPC03.mb.117cbin.1       | SGB_563 | 34  | 2499121 | 106409 | 41051  |
| Sample_YPA4.mb.65cbin.1         | SGB_261 | 91  | 2885011 | 54939  | 17683  |
| Sample_SPC25.mb.82cbin.1        | SGB_183 | 155 | 2355191 | 25944  | 6982   |
| Sample_SPA07.mb.20cbin.1        | SGB_622 | 75  | 3539272 | 68258  | 25724  |
| Sample_SPB20.mb.48              | SGB_282 | 154 | 1775021 | 15769  | 5947   |
| Sample_LCC09.mb.77              | SGB_407 | 99  | 2294816 | 39143  | 11278  |
| Sample_SCA55.mb.95              | SGB_193 | 112 | 2340306 | 40506  | 9845   |
| Sample_LPA04.mb.19              | SGB_211 | 118 | 2559405 | 39894  | 10153  |
| Sample_SPB35.mb.106             | SGB_187 | 276 | 2169528 | 10094  | 3869   |
| Sample_SPA47.mb.34              | SGB_317 | 330 | 2172824 | 8118   | 3138   |
| Sample_SCA60.mb.67cbin.1        | SGB_14  | 76  | 4109085 | 75588  | 34010  |
| Sample_SCA65.Cluster164cbin.1   | SGB_254 | 54  | 2003443 | 57863  | 17031  |
| Sample_SPC34.Cluster784cbin.1   | SGB_305 | 41  | 2363632 | 102807 | 25449  |
| Sample_SPC09.Cluster4566cbin.1  | SGB_29  | 29  | 4491581 | 233134 | 79182  |
| Sample_SPC27.mb.81              | SGB_233 | 74  | 2842981 | 61111  | 20150  |
| Sample_LCA16.mb.56              | SGB_178 | 99  | 2243930 | 36811  | 9908   |
| Sample_SPC07.mb.32cbin.1        | SGB_164 | 21  | 2083020 | 161931 | 44706  |
| Sample_SCB70.Cluster6337cbin.1  | SGB_73  | 42  | 2126972 | 89801  | 24409  |
| Sample_SPC06.mb.74              | SGB_241 | 28  | 2073213 | 105292 | 34072  |
| Sample_SPC12.mb.60cbin.1        | SGB_445 | 115 | 2987042 | 45135  | 13150  |
| Sample_SCB58.mb.34cbin.1        | SGB_666 | 150 | 2767597 | 28872  | 9408   |
| Sample_YPB2.mb.74               | SGB_64  | 122 | 2216675 | 31659  | 8787   |
| Sample_SPC37.mb.21              | SGB_310 | 69  | 2290700 | 46609  | 21414  |
| Sample_SPB25.mb.92              | SGB_160 | 66  | 1916159 | 44684  | 16156  |
| Sample_SPC04.mb.92cbin.1        | SGB_30  | 68  | 4603732 | 128118 | 32179  |
| Sample_SPA03.Cluster11746cbin.1 | SGB_443 | 21  | 2168871 | 255743 | 42988  |
| Sample_SPC31.mb.68cbin.1        | SGB_472 | 41  | 3480005 | 142601 | 46284  |
| Sample_LCC09.Cluster2953cbin.1  | SGB_658 | 14  | 1708442 | 149944 | 51613  |
| Sample_SPA22.mb.96              | SGB_290 | 218 | 2027989 | 11522  | 4887   |
| Sample_LPA02.Cluster15863       | SGB_91  | 21  | 1347461 | 96892  | 29935  |
| Sample_LPB05.mb.117             | SGB_319 | 78  | 2456228 | 56957  | 15196  |
| Sample_LCB14.mb.43              | SGB_203 | 57  | 2617531 | 72329  | 19861  |
| Sample_LPC04.mb.74              | SGB_664 | 134 | 2538102 | 27874  | 10181  |
| Sample_SPB20.mb.2               | SGB_303 | 67  | 2473222 | 59490  | 18926  |
| Sample_LCB20.mb.46              | SGB_279 | 363 | 1696126 | 5328   | 2659   |
| Sample_SCC70.mb.28              | SGB_529 | 97  | 3140576 | 49396  | 15263  |
| Sample_SPB15.mb.64              | SGB_224 | 50  | 2216108 | 60910  | 21538  |
| Sample_SPC27.mb.90              | SGB_375 | 65  | 2925512 | 84198  | 22038  |
| Sample_SPA04.Cluster14222       | SGB_137 | 410 | 2111042 | 5928   | 2553   |
| Sample_LCB10.Cluster3344        | SGB_612 | 43  | 3746935 | 151809 | 42787  |
| Sample_SPA08.mb.66              | SGB_461 | 43  | 2556661 | 77768  | 32064  |
| Sample_SCA58.mb.25cbin.1        | SGB_514 | 12  | 1521699 | 372070 | 43217  |
| Sample_SCA61.mb.26              | SGB_239 | 52  | 2297952 | 66387  | 23470  |
| Sample_SPC32.mb.18cbin.1        | SGB_50  | 48  | 1811368 | 62037  | 17942  |
| Sample_SPA34.mb.10cbin.1        | SGB_273 | 46  | 2602322 | 90884  | 29570  |
| Sample_YPC5.Cluster10250cbin.1  | SGB_432 | 44  | 3501426 | 153862 | 32088  |
| Sample_SCC67.mb.12              | SGB_79  | 39  | 1375372 | 56681  | 16489  |



|                                 |         |     |         |        |       |
|---------------------------------|---------|-----|---------|--------|-------|
| Sample_SCA55.Cluster11573cbin.1 | SGB_21  | 52  | 2283824 | 87029  | 24526 |
| Sample_SPB25.Cluster11630cbin.1 | SGB_119 | 29  | 1976061 | 100025 | 29165 |
| Sample_SPB26.Cluster7424        | SGB_9   | 27  | 2571837 | 168999 | 38421 |
| Sample_LCA20.mb.98              | SGB_656 | 428 | 3242367 | 9930   | 3855  |
| Sample_LCC14.Cluster234         | SGB_547 | 22  | 3304664 | 257562 | 97421 |
| Sample_LCB17.mb.81cbin.1        | SGB_623 | 99  | 2968979 | 46867  | 17078 |
| Sample_SPC32.Cluster6603cbin.1  | SGB_157 | 207 | 2966667 | 24033  | 5834  |
| Sample_SPA35.Cluster17834cbin.1 | SGB_154 | 19  | 1371900 | 96193  | 30804 |
| Sample_LCA12.Cluster6897cbin.1  | SGB_507 | 16  | 2336834 | 241705 | 70896 |
| Sample_SPA17.mb.3cbin.1         | SGB_639 | 44  | 2367105 | 87802  | 31499 |
| Sample_SPA03.mb.24              | SGB_192 | 170 | 2379244 | 18912  | 7136  |
| Sample_YPA2.mb.71               | SGB_97  | 50  | 1236524 | 40239  | 12458 |
| Sample_SPA41.mb.71              | SGB_408 | 74  | 2543783 | 56012  | 20176 |
| Sample_SCA59.mb.65              | SGB_488 | 96  | 2845867 | 44358  | 14641 |
| Sample_SPA26.mb.80cbin.1        | SGB_323 | 46  | 2287255 | 70075  | 27880 |
| Sample_YPA4.mb.11cbin.1         | SGB_151 | 134 | 2620200 | 32715  | 9808  |
| Sample_LPA03.mb.36              | SGB_494 | 33  | 2112493 | 112149 | 26576 |
| Sample_SPB21.Cluster563cbin.1   | SGB_544 | 41  | 3005580 | 103893 | 46881 |
| Sample_LPB04.mb.91cbin.1        | SGB_377 | 45  | 2876587 | 140942 | 44617 |
| Sample_LPC01.Cluster396cbin.1   | SGB_191 | 191 | 2212442 | 16217  | 5395  |
| Sample_LCC22.mb.27              | SGB_522 | 31  | 1948482 | 87603  | 36472 |
| Sample_SPC13.mb.54              | SGB_549 | 27  | 3194810 | 218648 | 79627 |
| Sample_LCA24.mb.55              | SGB_60  | 50  | 2226660 | 78560  | 18184 |
| Sample_SPC07.Cluster12882       | SGB_394 | 36  | 2646836 | 186627 | 34236 |
| Sample_SPB42.Cluster2849cbin.1  | SGB_32  | 35  | 4647577 | 351103 | 55866 |
| Sample_SPA25.Cluster5883        | SGB_674 | 79  | 2033797 | 41411  | 11505 |
| Sample_SPB08.mb.63              | SGB_289 | 30  | 1912673 | 130707 | 25570 |
| Sample_SCC58.mb.71              | SGB_190 | 69  | 2348781 | 53310  | 17709 |
| Sample_SPA26.Cluster2066        | SGB_175 | 28  | 2092136 | 103791 | 29154 |
| Sample_SPA39.mb.89cbin.1        | SGB_586 | 43  | 3149785 | 121713 | 42186 |
| Sample_SPA34.Cluster14210       | SGB_81  | 38  | 1113366 | 41153  | 14391 |
| Sample_SCC70.mb.34              | SGB_670 | 60  | 2039767 | 55672  | 15250 |
| Sample_SPC04.mb.22cbin.1        | SGB_584 | 175 | 3318643 | 29864  | 9758  |
| Sample_SPA15.Cluster523         | SGB_314 | 20  | 1623773 | 270695 | 67533 |
| Sample_SPC10.mb.23cbin.1        | SGB_46  | 13  | 2553360 | 426618 | 81642 |
| Sample_SPB26.mb.7               | SGB_649 | 83  | 1913960 | 32046  | 11718 |
| Sample_SCC70.mb.109cbin.1       | SGB_562 | 53  | 2460378 | 56867  | 25982 |
| Sample_SCC70.Cluster12153cbin.1 | SGB_334 | 42  | 2409555 | 116535 | 32497 |
| Sample_SPC28.mb.92              | SGB_360 | 41  | 3302646 | 137179 | 56175 |
| Sample_SCB70.mb.28              | SGB_95  | 32  | 1084725 | 50846  | 19875 |
| Sample_SPA37.mb.72              | SGB_521 | 271 | 4091254 | 21380  | 6968  |
| Sample_LCB14.mb.45              | SGB_657 | 296 | 2815818 | 12617  | 4769  |
| Sample_SPB37.mb.17cbin.1        | SGB_543 | 208 | 3165435 | 25766  | 7224  |
| Sample_SPB32.mb.39              | SGB_385 | 203 | 2771159 | 23473  | 5833  |
| Sample_SPB12.mb.138             | SGB_297 | 59  | 2294673 | 58924  | 23539 |
| Sample_SPA38.Cluster5590cbin.1  | SGB_596 | 51  | 3339910 | 114282 | 35294 |
| Sample_SPB06.mb.46cbin.1        | SGB_339 | 24  | 2248886 | 208242 | 33888 |
| Sample_LCB09.mb.46cbin.1        | SGB_403 | 292 | 2828857 | 13957  | 4315  |
| Sample_LCA14.Cluster308cbin.1   | SGB_655 | 38  | 2998515 | 131226 | 45095 |
| Sample_LCB23.Cluster10438       | SGB_144 | 121 | 2432101 | 31318  | 9098  |
| Sample_YPA6.Cluster3578cbin.1   | SGB_185 | 28  | 2189032 | 130101 | 45168 |
| Sample_LPC04.mb.65cbin.1        | SGB_295 | 106 | 2401899 | 34165  | 11967 |
| Sample_LCB20.Cluster552cbin.1   | SGB_582 | 52  | 2440384 | 68717  | 23276 |
| Sample_LPC05.Cluster7412cbin.1  | SGB_450 | 80  | 3321657 | 72109  | 26230 |
| Sample_SPC06.mb.55              | SGB_435 | 60  | 2752342 | 68959  | 21802 |
| Sample_LCC17.Cluster13753cbin.1 | SGB_569 | 75  | 3358006 | 65491  | 25911 |

|                                |         |     |         |        |       |
|--------------------------------|---------|-----|---------|--------|-------|
| Sample_SPA08.mb.119            | SGB_636 | 90  | 2100421 | 35957  | 11364 |
| Sample_SPC10.mb.11             | SGB_58  | 162 | 1752837 | 18101  | 4512  |
| Sample_SCA58.Cluster6503cbin.1 | SGB_320 | 64  | 1809777 | 47294  | 12965 |
| Sample_SPA37.Cluster18         | SGB_516 | 316 | 2382714 | 10162  | 3794  |
| Sample_SPA08.mb.13             | SGB_150 | 30  | 2536629 | 135172 | 42795 |
| Sample_LCB17.mb.100            | SGB_52  | 44  | 1819040 | 74524  | 26257 |
| Sample_LCB21.mb.96             | SGB_520 | 139 | 3578815 | 39632  | 11273 |

| Genome information |                   | CheckM estimation   |                      |                    |
|--------------------|-------------------|---------------------|----------------------|--------------------|
| Max length<br>(bp) | GC content<br>(%) | Completeness<br>(%) | Contamination<br>(%) | Checkm lineage     |
| 49968              | 62.72             | 90.79               | 2.71                 | Clostridia         |
| 443710             | 57.93             | 100.00              | 0.00                 | Bacteroidetes      |
| 233123             | 44.26             | 88.60               | 0.00                 | Clostridiales      |
| 132091             | 58.59             | 92.63               | 2.80                 | Clostridiales      |
| 268346             | 51.08             | 93.91               | 0.68                 | Bacteria           |
| 503057             | 53.23             | 98.65               | 1.68                 | Clostridiales      |
| 202786             | 56.74             | 88.36               | 0.04                 | Clostridiales      |
| 262829             | 51.23             | 97.66               | 2.81                 | Lachnospiraceae    |
| 305951             | 59.91             | 99.19               | 0.81                 | Actinobacteria     |
| 70866              | 45.49             | 97.85               | 2.02                 | Selenomonadales    |
| 215133             | 61.62             | 97.37               | 1.25                 | Proteobacteria     |
| 191510             | 53.58             | 99.19               | 1.08                 | Clostridia         |
| 224185             | 55.18             | 100.00              | 0.00                 | Proteobacteria     |
| 632868             | 27.37             | 94.94               | 1.12                 | Bacteria           |
| 196568             | 44.95             | 98.99               | 0.00                 | Clostridiales      |
| 408938             | 41.92             | 97.98               | 0.00                 | Clostridiales      |
| 661303             | 45.45             | 99.19               | 0.12                 | Actinobacteria     |
| 56069              | 48.29             | 87.19               | 3.76                 | Bacteroidales      |
| 286082             | 58.26             | 99.30               | 0.93                 | Clostridiales      |
| 47077              | 42.99             | 90.12               | 1.48                 | Clostridiales      |
| 316327             | 27.15             | 80.02               | 1.34                 | Clostridiales      |
| 183828             | 26.62             | 81.46               | 3.37                 | Bacteria           |
| 743981             | 54.90             | 100.00              | 0.00                 | Bacteroidetes      |
| 196112             | 46.15             | 98.11               | 1.10                 | Bacteroidales      |
| 27515              | 52.65             | 80.15               | 1.01                 | Clostridia         |
| 103759             | 53.31             | 89.82               | 0.58                 | Clostridiales      |
| 126469             | 61.24             | 86.07               | 1.34                 | Clostridiales      |
| 186791             | 28.52             | 93.48               | 4.58                 | Clostridiales      |
| 167578             | 52.99             | 98.93               | 0.00                 | Bacteroidales      |
| 216216             | 25.26             | 92.41               | 1.12                 | Bacteria           |
| 94778              | 53.15             | 97.31               | 0.36                 | Clostridiales      |
| 65183              | 57.22             | 95.52               | 2.57                 | Clostridiales      |
| 239866             | 40.37             | 98.65               | 0.00                 | Clostridiales      |
| 48011              | 59.66             | 88.04               | 2.02                 | Actinobacteria     |
| 604059             | 58.50             | 99.90               | 0.45                 | Bifidobacteriaceae |
| 177633             | 58.80             | 93.08               | 1.78                 | Bifidobacteriaceae |
| 98368              | 61.06             | 94.40               | 0.68                 | Clostridiales      |
| 87556              | 59.37             | 81.43               | 0.92                 | Clostridiales      |
| 120370             | 58.25             | 93.84               | 0.67                 | Clostridiales      |
| 143497             | 46.56             | 96.77               | 0.00                 | Bacteria           |
| 161733             | 38.07             | 98.11               | 0.75                 | Lactobacillales    |
| 250622             | 43.64             | 99.77               | 0.67                 | Clostridiales      |
| 179528             | 53.78             | 97.14               | 0.00                 | Prevotella         |
| 235268             | 46.92             | 98.02               | 1.25                 | Proteobacteria     |
| 155154             | 60.12             | 96.92               | 1.87                 | Clostridiales      |
| 366528             | 46.11             | 85.45               | 0.67                 | Clostridiales      |
| 134209             | 57.29             | 91.53               | 1.88                 | Clostridia         |
| 562904             | 45.12             | 98.49               | 0.24                 | Lachnospiraceae    |
| 531531             | 52.84             | 97.31               | 0.00                 | Clostridiales      |
| 267944             | 26.57             | 91.57               | 4.49                 | Bacteria           |
| 252379             | 30.90             | 100.00              | 0.00                 | Euryarchaeota      |
| 41757              | 35.34             | 92.23               | 1.53                 | Clostridiales      |

|        |       |        |      |                    |
|--------|-------|--------|------|--------------------|
| 162991 | 49.83 | 96.15  | 1.05 | Clostridiales      |
| 336753 | 37.70 | 97.98  | 1.01 | Clostridiales      |
| 216053 | 37.11 | 97.76  | 0.34 | Clostridiales      |
| 243846 | 33.23 | 98.65  | 0.00 | Clostridiales      |
| 478966 | 41.15 | 99.32  | 0.00 | Clostridiales      |
| 176033 | 40.75 | 94.37  | 0.31 | Bacteroidales      |
| 310593 | 60.79 | 94.59  | 2.03 | Bacteria           |
| 57262  | 61.21 | 90.59  | 2.70 | Bacteria           |
| 190615 | 62.26 | 96.77  | 0.00 | Actinobacteria     |
| 230645 | 50.37 | 95.74  | 0.67 | Clostridiales      |
| 36668  | 51.17 | 86.46  | 0.00 | Clostridiales      |
| 68730  | 42.66 | 93.98  | 1.43 | Bacteria           |
| 209493 | 49.41 | 95.85  | 0.81 | Clostridia         |
| 406168 | 62.91 | 99.53  | 0.00 | Bifidobacteriaceae |
| 192538 | 46.14 | 91.27  | 1.34 | Clostridiales      |
| 613181 | 50.04 | 96.62  | 0.00 | Bacteria           |
| 193844 | 61.54 | 99.19  | 0.60 | Actinobacteria     |
| 555942 | 43.56 | 98.65  | 0.00 | Clostridiales      |
| 189533 | 48.79 | 96.42  | 1.34 | Clostridiales      |
| 187448 | 60.59 | 96.64  | 0.81 | Clostridiales      |
| 314831 | 42.83 | 97.98  | 0.67 | Clostridiales      |
| 181889 | 45.42 | 95.97  | 0.00 | Clostridiales      |
| 198307 | 26.37 | 91.57  | 0.16 | Bacteria           |
| 606694 | 43.74 | 99.62  | 0.00 | Bacteroidales      |
| 367307 | 43.87 | 98.32  | 0.67 | Clostridiales      |
| 220297 | 54.94 | 97.31  | 0.67 | Clostridiales      |
| 128153 | 36.47 | 99.02  | 0.00 | Lactobacillus      |
| 74892  | 46.43 | 90.49  | 0.67 | Clostridiales      |
| 69898  | 43.53 | 97.46  | 0.65 | Clostridiales      |
| 52959  | 43.80 | 88.60  | 3.42 | Clostridiales      |
| 95991  | 46.40 | 94.66  | 1.86 | Prevotella         |
| 387254 | 46.10 | 97.41  | 0.19 | Bacteroidales      |
| 152756 | 28.08 | 91.57  | 1.69 | Bacteria           |
| 134196 | 58.35 | 92.39  | 1.01 | Clostridiales      |
| 305975 | 35.23 | 88.88  | 0.28 | Bacteria           |
| 345924 | 45.01 | 97.76  | 0.00 | Clostridiales      |
| 108719 | 29.63 | 100.00 | 0.11 | Bacteria           |
| 203744 | 37.96 | 99.32  | 2.06 | Clostridiales      |
| 66146  | 44.40 | 93.49  | 1.34 | Clostridiales      |
| 361372 | 51.00 | 97.98  | 0.17 | Clostridiales      |
| 133434 | 42.86 | 99.41  | 0.58 | Lachnospiraceae    |
| 258595 | 48.19 | 95.94  | 0.37 | Bacteroidales      |
| 197421 | 46.17 | 92.74  | 1.61 | Clostridia         |
| 222173 | 57.61 | 97.03  | 1.70 | Clostridiales      |
| 105175 | 49.73 | 92.09  | 1.00 | Bacteroidales      |
| 211249 | 28.78 | 97.55  | 1.77 | Clostridiales      |
| 221330 | 56.94 | 99.31  | 0.37 | Clostridiales      |
| 271931 | 59.77 | 100.00 | 0.00 | Bifidobacteriaceae |
| 315385 | 48.37 | 99.25  | 0.00 | Bacteroidales      |
| 127155 | 42.69 | 93.42  | 0.37 | Bacteroidales      |
| 78360  | 54.40 | 98.03  | 0.22 | Clostridiales      |
| 216393 | 26.78 | 92.41  | 0.00 | Bacteria           |
| 240161 | 37.77 | 98.65  | 0.00 | Clostridiales      |
| 463148 | 49.15 | 94.59  | 0.68 | Bacteria           |
| 24925  | 56.62 | 84.34  | 0.81 | Clostridia         |
| 155212 | 41.14 | 97.42  | 1.34 | Clostridiales      |
| 194948 | 60.24 | 97.58  | 0.81 | Actinobacteria     |
| 405371 | 41.13 | 99.51  | 0.00 | Lachnospiraceae    |

|        |       |        |      |                    |
|--------|-------|--------|------|--------------------|
| 120152 | 53.04 | 97.01  | 0.00 | Actinobacteria     |
| 62322  | 50.75 | 91.44  | 3.37 | Clostridiales      |
| 161268 | 65.23 | 97.98  | 1.55 | Proteobacteria     |
| 604421 | 36.27 | 98.65  | 0.00 | Clostridiales      |
| 102761 | 57.25 | 91.21  | 3.36 | Clostridiales      |
| 87996  | 38.58 | 99.36  | 1.90 | Selenomonadales    |
| 253722 | 49.48 | 97.84  | 0.00 | Bacteria           |
| 320146 | 44.53 | 98.38  | 3.96 | Lachnospiraceae    |
| 291132 | 42.76 | 95.26  | 1.44 | Bacteroidales      |
| 778381 | 32.12 | 89.74  | 0.85 | Bacteria           |
| 221002 | 46.11 | 93.73  | 0.89 | Clostridiales      |
| 421019 | 56.08 | 96.41  | 1.35 | Enterobacteriaceae |
| 360667 | 36.59 | 99.32  | 0.34 | Clostridiales      |
| 536808 | 32.57 | 99.47  | 0.00 | Lactobacillales    |
| 87185  | 37.76 | 98.50  | 1.04 | Lactobacillales    |
| 204103 | 40.57 | 92.61  | 0.00 | Clostridiales      |
| 178154 | 46.30 | 99.51  | 1.45 | Lachnospiraceae    |
| 329711 | 34.27 | 99.32  | 0.67 | Clostridiales      |
| 252072 | 45.89 | 97.75  | 0.58 | Lachnospiraceae    |
| 459526 | 66.31 | 85.48  | 0.69 | Actinobacteria     |
| 236225 | 48.58 | 93.92  | 0.19 | Bacteroidales      |
| 120795 | 49.27 | 92.61  | 2.33 | Bacteroidales      |
| 620036 | 49.31 | 98.70  | 0.00 | Clostridiales      |
| 511148 | 58.27 | 99.43  | 0.08 | Veillonellaceae    |
| 207859 | 44.69 | 97.46  | 1.27 | Clostridiales      |
| 177804 | 55.51 | 99.32  | 0.67 | Clostridiales      |
| 98837  | 58.80 | 94.29  | 0.67 | Clostridiales      |
| 144643 | 29.42 | 97.75  | 0.00 | Bacteria           |
| 260918 | 29.00 | 98.87  | 1.12 | Bacteria           |
| 238934 | 42.16 | 95.66  | 0.56 | Bacteroidales      |
| 482463 | 49.63 | 94.63  | 0.00 | Clostridiales      |
| 177962 | 46.74 | 97.98  | 0.00 | Clostridiales      |
| 219689 | 38.61 | 99.58  | 0.07 | Streptococcus      |
| 69148  | 46.05 | 91.38  | 0.63 | Clostridiales      |
| 211810 | 36.83 | 89.03  | 0.00 | Clostridiales      |
| 443010 | 64.26 | 100.00 | 1.15 | Actinobacteria     |
| 305312 | 42.84 | 97.31  | 0.00 | Clostridiales      |
| 163348 | 61.68 | 94.63  | 0.34 | Clostridiales      |
| 292508 | 48.62 | 87.80  | 0.00 | Clostridiales      |
| 622737 | 33.42 | 99.32  | 1.34 | Clostridiales      |
| 75116  | 49.58 | 96.08  | 0.88 | Bacteroidales      |
| 173204 | 46.88 | 96.81  | 1.60 | Lachnospiraceae    |
| 461576 | 26.70 | 93.53  | 0.00 | Bacteria           |
| 479183 | 46.44 | 99.25  | 0.19 | Bacteroidales      |
| 450191 | 55.88 | 97.95  | 1.36 | Bacteria           |
| 282057 | 41.83 | 97.41  | 2.75 | Lachnospiraceae    |
| 299072 | 35.98 | 99.32  | 0.50 | Clostridiales      |
| 384443 | 43.66 | 96.64  | 0.00 | Clostridiales      |
| 59538  | 57.78 | 92.68  | 2.03 | Bacteria           |
| 151330 | 55.14 | 99.10  | 0.02 | Clostridiales      |
| 551912 | 27.83 | 93.25  | 1.28 | Bacteria           |
| 480926 | 54.99 | 98.60  | 0.14 | Clostridiales      |
| 89926  | 44.16 | 97.46  | 0.00 | Clostridiales      |
| 404233 | 47.93 | 92.39  | 0.00 | Clostridiales      |
| 150713 | 26.30 | 91.57  | 2.25 | Bacteria           |
| 175566 | 59.48 | 91.72  | 3.69 | Clostridiales      |
| 17195  | 32.61 | 85.12  | 3.20 | Bacteria           |
| 165343 | 27.44 | 91.57  | 1.12 | Bacteria           |

|        |       |        |      |                    |
|--------|-------|--------|------|--------------------|
| 105377 | 38.72 | 90.62  | 0.95 | Streptococcus      |
| 122585 | 58.66 | 92.63  | 0.67 | Clostridiales      |
| 385285 | 45.22 | 99.19  | 0.19 | Bacteroidales      |
| 133592 | 46.86 | 98.56  | 2.42 | Lachnospiraceae    |
| 165765 | 44.13 | 97.31  | 0.34 | Clostridiales      |
| 243443 | 45.59 | 96.45  | 1.76 | Prevotella         |
| 112064 | 57.36 | 94.78  | 0.67 | Clostridiales      |
| 330627 | 58.26 | 98.56  | 0.68 | Clostridiales      |
| 266481 | 57.16 | 98.38  | 2.25 | Clostridia         |
| 85574  | 33.37 | 97.30  | 0.13 | Bacteria           |
| 146662 | 51.98 | 100.00 | 0.00 | Firmicutes         |
| 97806  | 49.14 | 80.58  | 1.59 | Bacteroidales      |
| 157053 | 44.05 | 95.89  | 2.17 | Lachnospiraceae    |
| 162366 | 59.31 | 87.69  | 0.00 | Clostridiales      |
| 328792 | 59.47 | 91.94  | 1.02 | Clostridiales      |
| 102674 | 44.65 | 89.30  | 1.35 | Bacteroidales      |
| 35165  | 60.46 | 80.06  | 0.67 | Clostridiales      |
| 384817 | 48.09 | 97.55  | 4.84 | Clostridia         |
| 197701 | 37.78 | 100.00 | 2.01 | Clostridiales      |
| 426251 | 40.40 | 99.32  | 0.00 | Clostridiales      |
| 150685 | 49.11 | 99.53  | 0.31 | Bacteroidales      |
| 123612 | 48.54 | 94.31  | 0.63 | Proteobacteria     |
| 188987 | 61.40 | 94.96  | 4.14 | Clostridiales      |
| 302418 | 30.87 | 100.00 | 0.94 | Bacteria           |
| 251367 | 41.81 | 100.00 | 0.00 | Clostridiales      |
| 138811 | 45.99 | 97.98  | 0.00 | Clostridiales      |
| 282937 | 40.64 | 97.09  | 0.00 | Clostridiales      |
| 190034 | 44.98 | 98.80  | 0.00 | Selenomonadales    |
| 229976 | 41.43 | 99.41  | 0.00 | Lachnospiraceae    |
| 277822 | 44.15 | 97.98  | 0.34 | Clostridiales      |
| 216413 | 45.14 | 94.14  | 0.74 | Bacteroidales      |
| 44873  | 56.81 | 93.44  | 0.00 | Bacteria           |
| 99748  | 52.45 | 99.36  | 0.63 | Firmicutes         |
| 512656 | 50.10 | 99.34  | 0.95 | Clostridiales      |
| 371089 | 59.97 | 95.65  | 0.16 | Proteobacteria     |
| 237720 | 38.51 | 99.36  | 0.00 | Clostridiales      |
| 596940 | 57.74 | 99.35  | 0.08 | Enterobacteriaceae |
| 266293 | 56.23 | 96.39  | 0.77 | Enterobacteriaceae |
| 124823 | 34.98 | 98.87  | 1.12 | Bacteria           |
| 287798 | 42.06 | 99.41  | 0.49 | Lachnospiraceae    |
| 283449 | 38.36 | 97.65  | 0.00 | Clostridiales      |
| 38080  | 59.42 | 90.45  | 0.00 | Clostridia         |
| 205869 | 36.98 | 95.11  | 0.00 | Clostridiales      |
| 121701 | 45.62 | 97.87  | 0.00 | Clostridiales      |
| 258911 | 61.30 | 97.31  | 0.67 | Clostridiales      |
| 122306 | 44.46 | 91.82  | 2.59 | Bacteroidales      |
| 392717 | 60.13 | 100.00 | 0.00 | Actinobacteria     |
| 322817 | 54.72 | 100.00 | 0.00 | Bacteroidetes      |
| 613077 | 46.40 | 100.00 | 0.48 | Bacteroidetes      |
| 152525 | 60.85 | 87.58  | 0.67 | Clostridiales      |
| 186997 | 25.73 | 94.38  | 3.37 | Bacteria           |
| 129752 | 50.55 | 97.84  | 0.00 | Bacteria           |
| 197639 | 42.40 | 90.31  | 0.77 | Bacteroidales      |
| 46124  | 48.93 | 87.29  | 3.66 | Clostridia         |
| 133956 | 29.93 | 99.05  | 0.00 | Bacteria           |
| 27810  | 39.94 | 80.48  | 0.84 | Clostridiales      |
| 129685 | 43.38 | 98.01  | 0.86 | Lachnospiraceae    |
| 214376 | 58.42 | 97.31  | 1.34 | Clostridiales      |

|        |       |        |      |                     |
|--------|-------|--------|------|---------------------|
| 342677 | 41.37 | 97.44  | 2.80 | Bacteroidales       |
| 291135 | 59.84 | 90.60  | 0.00 | Clostridiales       |
| 233844 | 40.67 | 96.64  | 0.00 | Clostridiales       |
| 143676 | 52.42 | 97.76  | 0.00 | Clostridiales       |
| 17999  | 39.58 | 82.36  | 3.31 | Pasteurellaceae     |
| 75798  | 47.98 | 86.45  | 1.53 | Bacteria            |
| 132296 | 60.56 | 94.46  | 0.67 | Clostridiales       |
| 100791 | 44.25 | 91.53  | 3.38 | Clostridiales       |
| 122824 | 62.11 | 90.91  | 3.02 | Clostridiales       |
| 115346 | 28.15 | 84.26  | 3.75 | Bacteria            |
| 133035 | 52.53 | 97.76  | 0.00 | Clostridiales       |
| 601448 | 54.26 | 100.00 | 0.12 | Actinobacteria      |
| 361291 | 42.75 | 97.31  | 0.00 | Clostridiales       |
| 165595 | 44.39 | 98.11  | 0.00 | Bacteria            |
| 342223 | 32.24 | 89.74  | 1.14 | Bacteria            |
| 264799 | 58.45 | 98.63  | 1.68 | Clostridiales       |
| 298071 | 49.34 | 98.88  | 0.00 | Bacteroidales       |
| 214846 | 56.94 | 94.63  | 4.14 | Clostridiales       |
| 119261 | 56.52 | 98.43  | 0.00 | Clostridiales       |
| 202735 | 36.73 | 95.97  | 0.00 | Clostridiales       |
| 87264  | 46.82 | 98.19  | 0.29 | Lactobacillus       |
| 167825 | 59.65 | 99.36  | 0.74 | Clostridiales       |
| 178028 | 25.63 | 88.48  | 0.00 | Bacteria            |
| 637625 | 43.05 | 99.25  | 0.00 | Bacteroidales       |
| 290528 | 40.87 | 99.03  | 1.22 | Lachnospiraceae     |
| 507737 | 44.01 | 99.46  | 0.54 | Bacteria            |
| 67787  | 61.97 | 98.22  | 0.00 | Deltaproteobacteria |
| 307910 | 47.83 | 98.94  | 0.63 | Clostridiales       |
| 234063 | 51.86 | 97.98  | 0.67 | Clostridiales       |
| 130590 | 28.36 | 96.49  | 3.51 | Bacteria            |
| 202625 | 53.39 | 90.93  | 0.67 | Clostridiales       |
| 327921 | 54.32 | 98.20  | 0.00 | Selenomonadales     |
| 147367 | 54.25 | 99.51  | 0.96 | Bacteroidetes       |
| 753688 | 34.69 | 99.22  | 0.00 | Lactobacillus       |
| 217851 | 33.71 | 98.65  | 0.00 | Clostridiales       |
| 93584  | 42.39 | 90.25  | 4.31 | Streptococcus       |
| 149520 | 56.14 | 94.74  | 2.01 | Clostridiales       |
| 177542 | 41.40 | 89.76  | 1.18 | Bacteroidales       |
| 69802  | 52.47 | 95.91  | 0.38 | Bacteroidales       |
| 146124 | 32.16 | 92.72  | 0.22 | Clostridiales       |
| 260158 | 37.62 | 99.62  | 0.00 | Lactobacillales     |
| 160356 | 63.44 | 100.00 | 0.00 | Actinobacteria      |
| 117747 | 43.16 | 100.00 | 0.32 | Clostridiales       |
| 410843 | 38.77 | 95.82  | 3.83 | Bacteroidales       |
| 131959 | 58.57 | 98.38  | 3.23 | Clostridia          |
| 118072 | 57.15 | 88.49  | 3.36 | Clostridiales       |
| 372012 | 43.44 | 95.81  | 1.50 | Bacteroidales       |
| 105622 | 37.29 | 96.22  | 4.72 | Bacteria            |
| 177550 | 38.89 | 89.57  | 4.74 | Lactobacillales     |
| 89972  | 45.98 | 90.99  | 2.42 | Clostridia          |
| 141640 | 57.79 | 92.61  | 0.67 | Clostridiales       |
| 274785 | 42.98 | 93.62  | 0.00 | Clostridiales       |
| 328650 | 45.55 | 98.88  | 0.23 | Bacteroidales       |
| 243201 | 58.35 | 91.27  | 2.03 | Clostridiales       |
| 492424 | 55.67 | 99.63  | 0.18 | Enterobacteriaceae  |
| 453051 | 54.87 | 99.32  | 0.67 | Clostridiales       |
| 97444  | 38.53 | 91.25  | 0.54 | Lachnospiraceae     |

|        |       |        |      |                 |
|--------|-------|--------|------|-----------------|
| 183832 | 55.74 | 94.36  | 2.35 | Clostridiales   |
| 52924  | 63.42 | 87.89  | 0.81 | Clostridiales   |
| 378979 | 58.62 | 98.65  | 1.34 | Clostridiales   |
| 441583 | 56.93 | 99.03  | 1.44 | Bacteroidetes   |
| 133650 | 52.67 | 97.42  | 1.47 | Bacteria        |
| 165176 | 48.65 | 91.93  | 0.03 | Clostridia      |
| 146171 | 42.51 | 86.10  | 2.41 | Bacteroides     |
| 473331 | 58.60 | 98.32  | 0.67 | Clostridiales   |
| 214338 | 31.25 | 100.00 | 0.63 | Firmicutes      |
| 480631 | 28.47 | 96.47  | 0.70 | Clostridiales   |
| 484519 | 41.80 | 99.16  | 0.00 | Clostridiales   |
| 50242  | 58.20 | 85.79  | 3.60 | Clostridiales   |
| 201593 | 34.54 | 98.29  | 3.26 | Clostridiales   |
| 246184 | 43.60 | 97.39  | 1.49 | Bacteroidales   |
| 163636 | 41.14 | 99.27  | 0.03 | Lachnospiraceae |
| 338848 | 60.10 | 97.98  | 0.67 | Clostridiales   |
| 108401 | 61.84 | 99.32  | 0.13 | Clostridiales   |
| 242429 | 47.84 | 92.61  | 0.00 | Clostridiales   |
| 368723 | 60.04 | 98.65  | 0.02 | Clostridiales   |
| 210542 | 29.61 | 92.13  | 0.56 | Bacteria        |
| 473043 | 49.25 | 99.34  | 1.58 | Clostridiales   |
| 66126  | 68.13 | 97.17  | 1.57 | Actinobacteria  |
| 272924 | 42.39 | 99.46  | 0.00 | Bacteria        |
| 127427 | 40.03 | 90.66  | 1.14 | Lachnospiraceae |
| 367825 | 44.96 | 99.19  | 0.81 | Actinobacteria  |
| 389686 | 28.57 | 98.66  | 0.11 | Bacteria        |
| 197980 | 49.89 | 98.89  | 0.00 | Lactobacillales |
| 120821 | 56.69 | 95.07  | 0.92 | Clostridiales   |
| 42347  | 56.40 | 98.41  | 0.68 | Clostridiales   |
| 67824  | 42.40 | 94.63  | 0.67 | Clostridiales   |
| 367684 | 55.44 | 97.95  | 0.00 | Bacteria        |
| 101655 | 45.45 | 92.13  | 0.81 | Clostridia      |
| 385242 | 62.17 | 87.33  | 2.69 | Clostridia      |
| 365895 | 40.49 | 97.76  | 0.67 | Clostridiales   |
| 183501 | 43.01 | 97.09  | 0.67 | Clostridiales   |
| 35025  | 52.07 | 87.74  | 3.38 | Bacteria        |
| 238308 | 41.83 | 98.73  | 0.63 | Clostridiales   |
| 186606 | 56.33 | 99.38  | 0.60 | Selenomonadales |
| 284348 | 39.47 | 98.65  | 0.34 | Clostridiales   |
| 408784 | 54.28 | 98.75  | 0.63 | Proteobacteria  |
| 215744 | 36.78 | 100.00 | 0.64 | Lactobacillales |
| 240989 | 31.80 | 100.00 | 0.00 | Euryarchaeota   |
| 180922 | 63.53 | 89.51  | 0.00 | Clostridia      |
| 47486  | 45.46 | 88.68  | 2.91 | Clostridiales   |
| 187882 | 59.62 | 91.49  | 0.00 | Clostridiales   |
| 172924 | 61.15 | 93.62  | 0.67 | Clostridiales   |
| 151689 | 29.07 | 99.05  | 0.00 | Bacteria        |
| 326703 | 41.78 | 99.32  | 0.00 | Clostridiales   |
| 371048 | 61.18 | 97.50  | 0.63 | Proteobacteria  |
| 208225 | 33.29 | 94.63  | 0.89 | Clostridiales   |
| 398552 | 62.18 | 92.61  | 0.04 | Clostridiales   |
| 276647 | 56.96 | 96.63  | 0.00 | Bacteroidetes   |
| 236616 | 48.32 | 99.42  | 3.12 | Lachnospiraceae |
| 182279 | 26.62 | 93.82  | 0.00 | Bacteria        |
| 267115 | 30.40 | 100.00 | 2.25 | Bacteria        |
| 242342 | 49.90 | 95.30  | 0.67 | Clostridiales   |
| 244220 | 45.14 | 99.19  | 0.12 | Actinobacteria  |
| 604172 | 45.33 | 99.61  | 0.00 | Bacteroidales   |



|        |       |        |      |                     |
|--------|-------|--------|------|---------------------|
| 60150  | 57.75 | 88.93  | 1.40 | Clostridiales       |
| 73340  | 54.93 | 88.97  | 2.01 | Clostridiales       |
| 182353 | 42.73 | 99.03  | 0.85 | Lachnospiraceae     |
| 158308 | 59.68 | 94.25  | 3.62 | Clostridiales       |
| 355365 | 29.35 | 91.57  | 1.12 | Bacteria            |
| 615990 | 42.73 | 97.33  | 0.19 | Bacteroides         |
| 600548 | 58.12 | 97.95  | 0.00 | Bacteria            |
| 45506  | 43.31 | 87.99  | 3.21 | Clostridiales       |
| 178816 | 60.00 | 100.00 | 0.00 | Bacteria            |
| 260026 | 44.10 | 97.98  | 0.00 | Clostridiales       |
| 511615 | 27.05 | 92.13  | 1.85 | Bacteria            |
| 309875 | 61.27 | 98.07  | 1.44 | Bacteroidetes       |
| 224692 | 42.02 | 98.10  | 0.59 | Bacteroides         |
| 254035 | 25.50 | 91.57  | 1.69 | Bacteria            |
| 303710 | 59.78 | 93.91  | 2.70 | Bacteria            |
| 256880 | 38.09 | 98.94  | 0.00 | Lactobacillus       |
| 311834 | 62.23 | 93.28  | 0.04 | Clostridiales       |
| 259349 | 53.26 | 100.00 | 0.00 | Selenomonadales     |
| 135105 | 48.02 | 94.19  | 0.74 | Bacteroidales       |
| 397834 | 49.38 | 99.09  | 0.72 | Lachnospiraceae     |
| 177474 | 57.54 | 97.98  | 0.67 | Clostridiales       |
| 226856 | 43.56 | 98.38  | 2.56 | Lachnospiraceae     |
| 145450 | 36.64 | 97.48  | 0.00 | Clostridiales       |
| 98894  | 61.17 | 93.95  | 0.67 | Clostridiales       |
| 263221 | 61.60 | 93.02  | 0.00 | Clostridiales       |
| 87054  | 58.85 | 97.86  | 1.21 | Deltaproteobacteria |
| 106740 | 48.41 | 90.87  | 0.67 | Clostridiales       |
| 134145 | 39.84 | 97.15  | 1.27 | Clostridiales       |
| 104018 | 45.91 | 94.63  | 0.67 | Clostridiales       |
| 142280 | 53.28 | 97.31  | 0.67 | Clostridiales       |
| 144847 | 46.03 | 95.30  | 0.00 | Clostridiales       |
| 53616  | 42.83 | 94.64  | 4.60 | Lactobacillales     |
| 169370 | 56.09 | 98.37  | 1.11 | Enterobacteriaceae  |
| 463355 | 42.98 | 99.46  | 0.00 | Bacteria            |
| 278911 | 49.93 | 94.35  | 0.00 | Clostridia          |
| 425066 | 47.65 | 99.36  | 0.95 | Clostridiales       |
| 33737  | 37.02 | 80.74  | 2.89 | Clostridiales       |
| 68807  | 59.67 | 88.54  | 4.87 | Clostridiales       |
| 149910 | 63.16 | 96.27  | 0.62 | Proteobacteria      |
| 193535 | 24.15 | 94.94  | 1.28 | Bacteria            |
| 489957 | 53.24 | 98.65  | 0.00 | Clostridiales       |
| 401575 | 42.74 | 98.34  | 2.43 | Bacteroidales       |
| 107199 | 59.95 | 93.78  | 1.52 | Bacteroidetes       |
| 391712 | 43.74 | 97.76  | 0.00 | Clostridiales       |
| 43485  | 61.82 | 85.90  | 2.35 | Clostridiales       |
| 104456 | 54.66 | 95.28  | 0.94 | Bacteroidales       |
| 259072 | 43.86 | 98.65  | 0.34 | Clostridiales       |
| 233756 | 41.42 | 98.06  | 2.78 | Lachnospiraceae     |
| 113913 | 46.46 | 92.49  | 1.99 | Lachnospiraceae     |
| 301777 | 27.98 | 97.60  | 0.00 | Euryarchaeota       |
| 85584  | 42.51 | 80.44  | 2.07 | Lachnospiraceae     |
| 167034 | 41.82 | 96.64  | 0.00 | Clostridiales       |
| 488322 | 52.81 | 97.04  | 0.00 | Clostridiales       |
| 128264 | 41.58 | 98.39  | 1.16 | Clostridiales       |
| 208962 | 40.97 | 98.10  | 1.58 | Clostridiales       |
| 37554  | 51.90 | 84.64  | 0.67 | Clostridiales       |
| 104601 | 60.76 | 100.00 | 0.00 | Actinobacteria      |

|        |       |        |      |                     |
|--------|-------|--------|------|---------------------|
| 201408 | 62.43 | 99.37  | 0.62 | Proteobacteria      |
| 246388 | 51.30 | 94.60  | 1.35 | Bacteroidetes       |
| 296099 | 57.60 | 93.73  | 2.35 | Clostridiales       |
| 56797  | 52.28 | 89.23  | 2.03 | Bacteria            |
| 385263 | 30.30 | 98.50  | 0.00 | Bacteria            |
| 618116 | 62.61 | 100.00 | 0.00 | Actinobacteria      |
| 107697 | 57.26 | 98.12  | 0.00 | Proteobacteria      |
| 108630 | 56.64 | 93.52  | 1.14 | Enterobacteriaceae  |
| 428351 | 41.31 | 95.32  | 0.10 | Lachnospiraceae     |
| 70265  | 42.90 | 90.21  | 2.09 | Clostridia          |
| 235790 | 38.70 | 98.12  | 1.47 | Lactobacillales     |
| 94440  | 46.78 | 97.66  | 3.74 | Lachnospiraceae     |
| 421562 | 41.83 | 99.32  | 0.00 | Clostridiales       |
| 62858  | 47.55 | 91.88  | 0.74 | Bacteroidales       |
| 490264 | 43.51 | 99.46  | 0.00 | Bacteria            |
| 266621 | 54.80 | 96.77  | 0.00 | Bacteroidetes       |
| 841953 | 34.59 | 99.22  | 0.00 | Lactobacillus       |
| 130711 | 47.22 | 97.71  | 1.61 | Clostridia          |
| 252150 | 26.82 | 96.77  | 0.00 | Clostridiales       |
| 280798 | 45.53 | 96.64  | 0.00 | Clostridiales       |
| 174242 | 44.54 | 93.83  | 0.00 | Bacteroidales       |
| 41345  | 37.23 | 88.28  | 1.48 | Clostridiales       |
| 136084 | 63.17 | 99.11  | 0.59 | Deltaproteobacteria |
| 268859 | 53.12 | 91.05  | 0.67 | Clostridiales       |
| 103273 | 59.60 | 91.27  | 2.68 | Clostridiales       |
| 243762 | 40.92 | 91.77  | 1.61 | Clostridiales       |
| 168257 | 61.35 | 96.40  | 0.27 | Clostridia          |
| 398220 | 28.47 | 91.01  | 2.81 | Bacteria            |
| 186252 | 57.27 | 88.25  | 0.00 | Clostridiales       |
| 111875 | 58.90 | 92.61  | 1.97 | Deltaproteobacteria |
| 35871  | 58.58 | 87.36  | 3.83 | Clostridiales       |
| 58403  | 47.98 | 86.24  | 2.57 | Bacteroidales       |
| 330399 | 49.88 | 96.64  | 0.00 | Clostridiales       |
| 191520 | 58.85 | 93.28  | 0.68 | Clostridiales       |
| 93685  | 61.92 | 95.13  | 2.01 | Clostridiales       |
| 413981 | 45.55 | 90.45  | 0.00 | Clostridia          |
| 98098  | 62.41 | 90.28  | 0.81 | Actinobacteria      |
| 41611  | 49.59 | 89.06  | 4.75 | Clostridiales       |
| 98089  | 40.81 | 93.73  | 0.67 | Clostridiales       |
| 148908 | 37.45 | 97.31  | 0.67 | Clostridiales       |
| 73708  | 63.03 | 89.97  | 0.96 | Bacteroidetes       |
| 166698 | 69.23 | 91.21  | 0.84 | Bacteria            |
| 189953 | 41.01 | 98.53  | 0.58 | Lachnospiraceae     |
| 180394 | 39.56 | 98.63  | 0.27 | Pasteurellaceae     |
| 487224 | 36.05 | 98.65  | 0.00 | Clostridiales       |
| 141520 | 56.56 | 95.37  | 2.72 | Clostridiales       |
| 170047 | 34.26 | 91.60  | 1.84 | Bacilli             |
| 495994 | 56.93 | 95.97  | 0.00 | Clostridiales       |
| 308631 | 55.75 | 98.88  | 0.37 | Bacteroidales       |
| 223289 | 42.16 | 99.24  | 0.19 | Bacteroidales       |
| 230808 | 48.78 | 99.36  | 0.00 | Clostridiales       |
| 242390 | 28.02 | 80.16  | 1.75 | Clostridiales       |
| 549211 | 41.54 | 95.97  | 0.00 | Clostridiales       |
| 304978 | 48.01 | 97.98  | 0.00 | Clostridiales       |
| 128661 | 52.79 | 99.18  | 0.00 | Lactobacillales     |
| 291132 | 43.55 | 99.98  | 0.90 | Selenomonadales     |

|        |       |        |      |                    |
|--------|-------|--------|------|--------------------|
| 696379 | 56.52 | 99.67  | 0.77 | Pseudomonadales    |
| 295671 | 43.27 | 99.21  | 1.21 | Lachnospiraceae    |
| 65497  | 46.61 | 94.29  | 0.67 | Clostridiales      |
| 121416 | 45.60 | 88.16  | 3.81 | Bacteroidales      |
| 468562 | 44.30 | 90.84  | 0.00 | Bacteroidales      |
| 122807 | 48.58 | 98.73  | 0.02 | Firmicutes         |
| 766001 | 51.88 | 93.95  | 0.83 | Clostridia         |
| 144046 | 29.41 | 89.93  | 1.33 | Bacteria           |
| 219523 | 55.58 | 99.01  | 0.84 | Clostridiales      |
| 54088  | 42.58 | 94.62  | 2.15 | Bacteria           |
| 408573 | 59.89 | 100.00 | 0.81 | Actinobacteria     |
| 204303 | 27.54 | 97.60  | 0.00 | Euryarchaeota      |
| 171564 | 55.33 | 98.46  | 0.38 | Bacteroidales      |
| 261562 | 38.76 | 98.65  | 0.00 | Clostridiales      |
| 237671 | 55.28 | 94.63  | 1.34 | Clostridiales      |
| 261706 | 49.65 | 95.39  | 0.00 | Clostridiales      |
| 62968  | 59.29 | 96.90  | 1.21 | Clostridia         |
| 133078 | 51.19 | 97.03  | 0.37 | Bacteroidales      |
| 275862 | 46.63 | 99.18  | 0.00 | Lactobacillales    |
| 110434 | 44.51 | 97.31  | 0.67 | Clostridiales      |
| 306540 | 59.91 | 93.91  | 2.70 | Bacteria           |
| 69904  | 59.34 | 94.23  | 1.60 | Bacteroidetes      |
| 166746 | 43.84 | 100.00 | 0.00 | Bacteria           |
| 199103 | 41.92 | 97.91  | 0.95 | Clostridiales      |
| 138931 | 59.53 | 100.00 | 0.81 | Actinobacteria     |
| 65243  | 48.28 | 88.97  | 0.00 | Clostridiales      |
| 104934 | 46.37 | 93.95  | 2.95 | Clostridiales      |
| 298584 | 58.65 | 97.93  | 0.14 | Clostridiales      |
| 23978  | 60.20 | 80.55  | 2.02 | Clostridia         |
| 624506 | 45.73 | 93.23  | 1.28 | Lachnospiraceae    |
| 27634  | 43.60 | 82.63  | 0.56 | Clostridiales      |
| 79545  | 54.43 | 94.63  | 0.09 | Bacteroidales      |
| 295621 | 45.88 | 98.52  | 0.38 | Bacteroidales      |
| 89860  | 48.48 | 100.00 | 0.11 | Proteobacteria     |
| 187466 | 50.83 | 89.16  | 0.70 | Clostridiales      |
| 273587 | 45.47 | 97.15  | 0.63 | Firmicutes         |
| 184058 | 45.23 | 92.17  | 0.00 | Clostridiales      |
| 165547 | 51.01 | 100.00 | 0.63 | Firmicutes         |
| 224789 | 58.53 | 100.00 | 0.00 | Bacteria           |
| 69224  | 45.16 | 93.45  | 0.97 | Lactobacillales    |
| 165080 | 49.03 | 94.30  | 0.00 | Clostridiales      |
| 375918 | 60.18 | 100.00 | 0.00 | Bifidobacteriaceae |
| 141725 | 58.94 | 92.95  | 4.42 | Clostridiales      |
| 226590 | 27.22 | 91.57  | 0.56 | Bacteria           |
| 207952 | 47.14 | 94.40  | 0.00 | Clostridiales      |
| 233902 | 46.38 | 98.55  | 1.55 | Lachnospiraceae    |
| 369842 | 45.07 | 99.42  | 0.00 | Bacteroidales      |
| 414333 | 59.20 | 100.00 | 0.48 | Bacteroidetes      |
| 352589 | 47.37 | 95.60  | 0.00 | Bacteria           |
| 114090 | 26.96 | 93.82  | 1.12 | Bacteria           |
| 136029 | 30.05 | 98.40  | 0.80 | Euryarchaeota      |
| 562128 | 51.21 | 97.27  | 0.00 | Clostridiales      |
| 23822  | 56.96 | 83.28  | 1.40 | Clostridiales      |
| 124223 | 58.18 | 97.42  | 0.49 | Clostridiales      |
| 35211  | 58.68 | 92.76  | 1.88 | Clostridia         |
| 393307 | 51.37 | 96.77  | 0.00 | Clostridia         |
| 326874 | 43.05 | 99.32  | 0.00 | Clostridiales      |
| 210745 | 49.21 | 97.46  | 0.00 | Proteobacteria     |

|        |       |        |      |                    |
|--------|-------|--------|------|--------------------|
| 638445 | 55.36 | 98.75  | 0.63 | Proteobacteria     |
| 254081 | 56.74 | 96.64  | 0.67 | Clostridiales      |
| 140797 | 40.08 | 96.84  | 1.32 | Streptococcus      |
| 170079 | 53.05 | 96.64  | 4.05 | Clostridiales      |
| 277882 | 60.65 | 97.31  | 1.28 | Clostridiales      |
| 193549 | 46.49 | 98.48  | 1.74 | Bacillus           |
| 81638  | 44.99 | 95.99  | 1.29 | Clostridiales      |
| 185858 | 57.38 | 95.27  | 0.68 | Bacteria           |
| 72256  | 44.23 | 90.65  | 0.81 | Clostridia         |
| 84644  | 56.18 | 96.36  | 3.34 | Enterobacteriaceae |
| 159991 | 59.82 | 94.29  | 0.34 | Clostridiales      |
| 188312 | 25.25 | 91.01  | 1.12 | Bacteria           |
| 603123 | 44.23 | 100.00 | 0.17 | Clostridiales      |
| 216238 | 51.22 | 94.25  | 0.68 | Prevotella         |
| 158100 | 56.46 | 89.93  | 0.34 | Clostridiales      |
| 82056  | 33.58 | 99.05  | 0.00 | Bacteria           |
| 577628 | 55.20 | 99.10  | 0.11 | Enterobacteriaceae |
| 93466  | 45.42 | 94.35  | 1.15 | Lactobacillales    |
| 163584 | 45.41 | 91.72  | 0.31 | Bacteroidales      |
| 118099 | 56.08 | 98.43  | 0.00 | Clostridiales      |
| 239004 | 27.51 | 91.29  | 1.69 | Bacteria           |
| 307668 | 44.83 | 96.62  | 1.12 | Bacteria           |
| 225256 | 45.38 | 98.64  | 0.68 | Prevotella         |
| 169842 | 49.13 | 98.10  | 0.00 | Clostridiales      |
| 174977 | 61.05 | 91.94  | 3.38 | Clostridiales      |
| 123622 | 57.82 | 84.64  | 1.07 | Clostridiales      |
| 148011 | 57.23 | 98.27  | 4.55 | Bacteria           |
| 40820  | 51.12 | 90.73  | 1.06 | Bacteroidetes      |
| 50258  | 43.66 | 84.95  | 1.03 | Bacteroidales      |
| 204565 | 37.01 | 99.32  | 0.67 | Clostridiales      |
| 541835 | 41.60 | 96.12  | 0.37 | Bacteroidales      |
| 64186  | 39.21 | 92.02  | 2.27 | Streptococcus      |
| 203736 | 24.95 | 93.82  | 2.97 | Bacteria           |
| 242254 | 59.69 | 100.00 | 0.81 | Actinobacteria     |
| 339925 | 48.74 | 99.26  | 0.00 | Bacteria           |
| 221704 | 42.08 | 98.65  | 0.67 | Clostridiales      |
| 311424 | 42.84 | 99.10  | 0.67 | Clostridiales      |
| 52326  | 43.43 | 93.14  | 1.76 | Bacteroidales      |
| 61109  | 57.53 | 94.85  | 0.00 | Bacteria           |
| 77380  | 44.95 | 90.96  | 3.27 | Lachnospiraceae    |
| 384478 | 60.47 | 99.55  | 0.00 | Bifidobacteriaceae |
| 201156 | 60.39 | 93.95  | 0.67 | Clostridiales      |
| 150562 | 56.10 | 96.50  | 0.00 | Bacteria           |
| 396438 | 60.57 | 98.79  | 0.81 | Euryarchaeota      |
| 128335 | 48.22 | 97.17  | 0.81 | Clostridia         |
| 215352 | 57.16 | 97.53  | 0.00 | Clostridiales      |
| 534856 | 46.62 | 94.38  | 1.40 | Clostridiales      |
| 67385  | 50.46 | 97.22  | 0.00 | Clostridiales      |
| 653659 | 48.92 | 95.96  | 0.00 | Clostridia         |
| 331104 | 54.46 | 98.38  | 0.00 | Actinobacteria     |
| 117211 | 46.70 | 83.47  | 3.99 | Lachnospiraceae    |
| 246019 | 45.35 | 99.40  | 0.60 | Selenomonadales    |
| 644042 | 56.40 | 100.00 | 0.23 | Bifidobacteriaceae |
| 65513  | 59.35 | 93.92  | 0.99 | Clostridiales      |
| 118622 | 60.67 | 100.00 | 1.41 | Actinobacteria     |
| 172181 | 57.88 | 92.61  | 0.67 | Clostridiales      |
| 179472 | 44.75 | 94.30  | 0.95 | Clostridiales      |
| 84336  | 34.06 | 93.66  | 1.65 | Bacteria           |

|        |       |        |      |                    |
|--------|-------|--------|------|--------------------|
| 161923 | 52.60 | 98.05  | 0.00 | Bacteroidales      |
| 179984 | 50.29 | 81.22  | 0.19 | Bacteroidales      |
| 238576 | 41.29 | 98.16  | 3.64 | Lachnospiraceae    |
| 78023  | 54.02 | 88.59  | 2.84 | Clostridiales      |
| 577464 | 48.66 | 91.21  | 0.68 | Bacteria           |
| 42580  | 72.77 | 93.56  | 4.55 | Actinomycetaceae   |
| 60664  | 61.66 | 94.28  | 1.48 | Clostridiales      |
| 280203 | 41.70 | 97.73  | 1.54 | Bacteroides        |
| 313870 | 42.55 | 99.31  | 0.00 | Clostridiales      |
| 354493 | 43.85 | 96.28  | 0.63 | Clostridiales      |
| 70052  | 49.61 | 95.56  | 0.63 | Clostridiales      |
| 201721 | 53.84 | 98.86  | 0.38 | Bacteroidales      |
| 159820 | 57.77 | 94.63  | 1.34 | Clostridiales      |
| 124426 | 51.02 | 97.31  | 0.00 | Clostridiales      |
| 198396 | 44.37 | 97.48  | 0.56 | Bacteroidales      |
| 48089  | 51.30 | 91.10  | 2.01 | Clostridiales      |
| 170967 | 41.79 | 94.63  | 0.61 | Lachnospiraceae    |
| 102112 | 58.79 | 95.10  | 2.04 | Clostridiales      |
| 119502 | 62.49 | 90.15  | 1.83 | Clostridiales      |
| 47634  | 59.15 | 88.70  | 4.31 | Clostridiales      |
| 29006  | 58.11 | 83.41  | 0.28 | Clostridiales      |
| 240052 | 59.43 | 93.91  | 2.36 | Bacteria           |
| 208203 | 60.41 | 93.28  | 0.67 | Clostridiales      |
| 221255 | 56.84 | 88.59  | 0.67 | Clostridiales      |
| 889727 | 47.97 | 98.52  | 0.67 | Enterobacteriaceae |
| 143748 | 61.98 | 92.72  | 0.67 | Clostridiales      |
| 143136 | 49.68 | 96.97  | 0.34 | Clostridiales      |
| 402958 | 48.96 | 95.89  | 0.00 | Clostridiales      |
| 203933 | 47.62 | 100.00 | 0.90 | Selenomonadales    |
| 246564 | 58.90 | 91.27  | 0.67 | Clostridiales      |
| 146895 | 43.95 | 97.78  | 3.71 | Clostridiales      |
| 83609  | 61.99 | 95.80  | 3.02 | Clostridiales      |
| 87350  | 51.94 | 95.56  | 0.00 | Firmicutes         |
| 171088 | 59.68 | 91.05  | 0.00 | Clostridiales      |
| 139437 | 47.84 | 96.09  | 0.24 | Clostridiales      |
| 403665 | 50.75 | 99.96  | 0.04 | Enterobacteriaceae |
| 380018 | 37.47 | 99.32  | 0.00 | Clostridiales      |
| 785241 | 28.01 | 100.00 | 0.09 | Clostridiales      |
| 784595 | 52.89 | 97.17  | 0.00 | Clostridia         |
| 33945  | 56.25 | 85.18  | 1.51 | Clostridiales      |
| 223645 | 24.88 | 92.69  | 2.81 | Bacteria           |
| 173093 | 56.16 | 97.85  | 2.75 | Clostridiales      |
| 226827 | 52.96 | 97.98  | 0.00 | Clostridiales      |
| 113541 | 41.17 | 93.71  | 2.70 | Bacteria           |
| 158317 | 45.70 | 95.30  | 1.34 | Clostridiales      |
| 15993  | 61.26 | 83.02  | 1.23 | Clostridiales      |
| 147622 | 51.45 | 93.17  | 0.63 | Bacteroidetes      |
| 168147 | 63.97 | 87.24  | 1.34 | Clostridiales      |
| 215292 | 35.67 | 98.51  | 0.67 | Clostridiales      |
| 33212  | 34.11 | 80.09  | 1.31 | Bacilli            |
| 358443 | 44.65 | 98.52  | 0.37 | Bacteroidales      |
| 218463 | 44.86 | 95.57  | 0.00 | Lachnospiraceae    |
| 573640 | 48.70 | 92.33  | 0.81 | Clostridia         |
| 211357 | 58.12 | 98.65  | 0.00 | Clostridiales      |
| 157085 | 47.06 | 96.77  | 0.00 | Bacteria           |
| 269705 | 57.62 | 95.74  | 1.34 | Clostridiales      |
| 395016 | 33.32 | 99.32  | 1.68 | Clostridiales      |
| 148317 | 26.12 | 93.33  | 0.00 | Bacteria           |

|        |       |        |      |                     |
|--------|-------|--------|------|---------------------|
| 171681 | 36.81 | 98.79  | 0.29 | Gamma               |
|        |       |        |      | proteobacter        |
|        |       |        |      | ia                  |
| 359503 | 38.24 | 99.61  | 0.00 | Lactobacillales     |
| 385809 | 46.11 | 94.59  | 1.35 | Bacteria            |
| 38595  | 48.53 | 87.57  | 2.20 | Lachnospiraceae     |
| 515577 | 58.21 | 99.27  | 0.48 | Bacteroidetes       |
| 119252 | 46.11 | 92.74  | 0.75 | Bacteroidales       |
| 90330  | 27.15 | 98.94  | 1.06 | Clostridiales       |
| 278938 | 28.16 | 81.91  | 2.33 | Clostridiales       |
| 502089 | 48.13 | 96.37  | 0.00 | Clostridia          |
| 198416 | 60.06 | 100.00 | 0.81 | Actinobacteria      |
| 92483  | 58.98 | 92.30  | 1.19 | Clostridiales       |
| 131902 | 26.07 | 93.33  | 1.33 | Bacteria            |
| 110103 | 41.93 | 97.07  | 0.88 | Lachnospiraceae     |
| 99836  | 58.83 | 98.38  | 1.08 | Clostridia          |
| 239486 | 38.62 | 98.65  | 0.34 | Clostridiales       |
| 85746  | 42.65 | 95.97  | 1.40 | Clostridiales       |
| 196381 | 52.78 | 99.19  | 0.81 | Clostridia          |
| 168082 | 58.88 | 100.00 | 0.00 | Bacteroidetes       |
| 365099 | 37.16 | 98.65  | 0.00 | Clostridiales       |
| 141309 | 59.65 | 87.27  | 0.85 | Clostridiales       |
| 394436 | 32.83 | 88.88  | 0.85 | Bacteria            |
| 551659 | 59.02 | 99.40  | 0.00 | Bacteroidetes       |
| 274650 | 54.06 | 100.00 | 0.00 | Selenomonadales     |
| 479553 | 32.40 | 99.32  | 1.34 | Clostridiales       |
| 610102 | 56.20 | 98.63  | 0.77 | Enterobacteriaceae  |
| 132972 | 43.74 | 97.92  | 1.20 | Lactobacillales     |
| 393329 | 55.79 | 89.26  | 0.00 | Clostridiales       |
| 202378 | 60.57 | 97.27  | 0.31 | Clostridiales       |
| 245012 | 54.55 | 97.14  | 0.00 | Clostridiales       |
| 302851 | 49.11 | 99.24  | 0.00 | Bacteroidales       |
| 93272  | 26.05 | 92.69  | 2.25 | Bacteria            |
| 216711 | 44.81 | 81.42  | 0.79 | Rhodospirillales    |
| 153913 | 43.10 | 91.69  | 1.25 | Prevotella          |
| 321648 | 57.55 | 85.90  | 0.81 | Clostridiales       |
| 516079 | 57.02 | 96.87  | 0.00 | Proteobacteria      |
| 121896 | 55.45 | 98.15  | 0.81 | Euryarchaeota       |
| 161358 | 50.15 | 97.54  | 0.00 | Bacteroidales       |
| 264763 | 44.05 | 97.09  | 0.00 | Clostridiales       |
| 348708 | 44.31 | 97.98  | 0.67 | Clostridiales       |
| 123548 | 27.63 | 91.01  | 0.00 | Bacteria            |
| 164921 | 60.01 | 99.11  | 0.59 | Deltaproteobacteria |
| 37915  | 59.66 | 93.17  | 1.36 | Clostridiales       |
| 86146  | 59.72 | 92.25  | 1.87 | Bacteroidetes       |
| 120337 | 38.37 | 87.52  | 1.17 | Lachnospiraceae     |
| 396020 | 51.54 | 98.32  | 0.67 | Clostridiales       |
| 179475 | 48.90 | 98.74  | 0.37 | Bacteroidales       |
| 399720 | 52.01 | 97.27  | 0.00 | Clostridiales       |
| 58531  | 48.83 | 92.22  | 4.63 | Lachnospiraceae     |
| 323227 | 59.62 | 95.23  | 0.23 | Clostridiales       |
| 139185 | 28.20 | 91.50  | 0.00 | Bacteria            |
| 300329 | 51.45 | 98.65  | 0.67 | Clostridiales       |
| 109945 | 53.01 | 96.42  | 0.34 | Clostridiales       |
| 200208 | 50.99 | 97.93  | 1.01 | Prevotella          |
| 200197 | 45.38 | 96.83  | 3.16 | Clostridiales       |
| 343803 | 44.36 | 100.00 | 0.12 | Clostridiales       |
| 152513 | 38.43 | 99.05  | 0.00 | Bacteroidales       |

|        |       |        |      |                     |
|--------|-------|--------|------|---------------------|
| 181885 | 62.41 | 99.19  | 0.81 | Actinobacteria      |
| 53256  | 38.57 | 88.25  | 4.91 | Selenomonadales     |
| 108476 | 48.00 | 95.07  | 0.00 | Clostridiales       |
| 26320  | 63.38 | 93.48  | 1.30 | Deltaproteobacteria |
| 215501 | 54.60 | 81.29  | 1.53 | Clostridia          |
| 194712 | 45.70 | 98.92  | 0.00 | Bacteria            |
| 186894 | 62.59 | 100.00 | 1.38 | Deltaproteobacteria |

---



---

**Taxonomic position**

---

| Phylum            | Species                                   |
|-------------------|-------------------------------------------|
| Firmicutes        | Christensenellales sp. CAG6               |
| Bacteroidota      | Alistipes sp. CAG:3                       |
| Firmicutes        | uncultured Ruminococcus sp.               |
| Firmicutes        | Christensenellales sp. CAG3               |
| Verrucomicrobiota | Coraliomargarita sp. CAG:1                |
| Firmicutes        | Ruminococcaceae bacterium                 |
| Firmicutes        | Angelakisella sp.CAG1                     |
| Firmicutes        | Lachnoclostridium sp. An118               |
| Actinobacteriota  | Coriobacteriaceae bacterium               |
| Firmicutes        | Megasphaera micronuciformis               |
| Proteobacteria    | Sutterella sp. CAG3                       |
| Firmicutes        | Clostridia bacterium                      |
| Proteobacteria    | Sutterella wadsworthensis                 |
| Firmicutes        | Clostridium sp. CAG:710                   |
| Firmicutes        | Eubacterium siraeum                       |
| Firmicutes        | Clostridiales bacterium 41_21_two_genomes |
| Actinobacteriota  | Eggerthella sp. CAG:368                   |
| Bacteroidota      | Bacteroides sp, CAG1                      |
| Firmicutes        | Clostridiales bacterium                   |
| Firmicutes        | unclutured Clostridiales sp. CAG:51       |
| Firmicutes        | Clostridium sp. CAG:492                   |
| Firmicutes        | Clostridium sp. CAG:609                   |
| Bacteroidota      | Alistipes indistinctus                    |
| Bacteroidota      | Muribaculaceae sp. CAG4                   |
| Firmicutes        | Clostridiales bacterium                   |
| Firmicutes        | Clostridiales bacterium                   |
| Firmicutes        | Oscillospiraceae sp. CAG5                 |
| Firmicutes        | uncultured Clostridium sp.                |
| Bacteroidota      | Prevotella sp. CAG:485                    |
| Firmicutes        | Mycoplasma sp. CAG:472                    |
| Firmicutes        | Clostridium sp. CAG:58                    |
| Firmicutes        | Ruminococcaceae sp. CAG4                  |
| Firmicutes        | Lachnospiraceae bacterium                 |
| Actinobacteriota  | Coriobacteriia bacterium                  |
| Actinobacteriota  | Bifidobacterium dentium                   |
| Actinobacteriota  | Bifidobacterium breve                     |
| Firmicutes        | Clostridiales sp. CAG:9                   |
| Firmicutes        | Butyricoccus sp. OM04-18BH                |
| Firmicutes        | Clostridiales bacterium                   |
| Proteobacteria    | Azospirillum sp. CAG1                     |
| Firmicutes        | Enterococcus faecium                      |
| Firmicutes        | Firmicutes bacterium CAG:882              |
| Bacteroidota      | Prevotella sp.                            |
| Proteobacteria    | Sutterella sp. CAG:521                    |
| Firmicutes        | Faecalibacterium prausnitzii              |
| Firmicutes        | Firmicutes bacterium CAG:475              |
| Firmicutes        | Clostridiales sp. CAG:40                  |
| Firmicutes        | Roseburia sp. AM16-25                     |
| Firmicutes        | Clostridiales bacterium                   |
| Firmicutes        | Firmicutes bacterium CAG:460              |
| Euryarchaeota     | Methanobrevibacter smithii CAG:186        |
| Firmicutes        | Eubacterium sp. AF15-50                   |



|                   |                                                 |
|-------------------|-------------------------------------------------|
| Firmicutes        | Clostridiales bacterium                         |
| Firmicutes        | uncultured Clostridium sp.                      |
| Firmicutes        | Clostridiales bacterium                         |
| Firmicutes        | Eubacterium sp. AF36-5BH                        |
| Firmicutes        | uncultured Coprococcus sp.                      |
| Bacteroidota      | Bacteroides coprocola CAG:162                   |
| Verrucomicrobiota | Lentisphaeria bacterium                         |
| Verrucomicrobiota | Victivallis sp. CAG:3                           |
| Actinobacteriota  | Eggerthella sp. AM16-19                         |
| Firmicutes        | Clostridiales sp. CAG:35                        |
| Firmicutes        | Mogibacterium sp. CAG1                          |
| Bacteroidota      | Odoribacter sp. AF21-41                         |
| Firmicutes        | Clostridiales bacterium                         |
| Actinobacteriota  | Bifidobacterium bifidum                         |
| Firmicutes        | Roseburia sp. AM59-24XD                         |
| Elusimicrobia     | uncultured Elusimicrobium sp. CAG2              |
| Actinobacteria    | uncultured Slackia sp. CAG1                     |
| Firmicutes        | Lachnospiraceae bacterium                       |
| Firmicutes        | Clostridiales sp. CAG:30                        |
| Firmicutes        | Clostridiales sp. CAG:6                         |
| Firmicutes        | Clostridiales sp. CAG:5                         |
| Firmicutes        | Ruminococcaceae bacterium                       |
| Firmicutes        | Bacilli sp. CAG2                                |
| Bacteroidota      | Bacteroides sp. CAG:20                          |
| Firmicutes        | Coprococcus catus                               |
| Firmicutes        | Clostridiales sp. CAG:4                         |
| Firmicutes        | Lactobacillus crispatus                         |
| Firmicutes        | Clostridiales sp. CAG:47                        |
| Firmicutes        | uncultured Blautia sp.                          |
| Firmicutes        | Coprococcus catus                               |
| Bacteroidota      | Prevotella copri                                |
| Bacteroidota      | Bacteroides stercoris                           |
| Firmicutes        | Clostridium sp. CAG:451                         |
| Firmicutes        | Clostridiales sp. CAG:23                        |
| Cyanobacteria     | Candidatus Gastranaerophilales bacterium HUM_10 |
| Firmicutes        | Ruminococcaceae bacterium                       |
| Firmicutes        | Acholeplasmatales bacterium                     |
| Firmicutes        | uncultured Eubacterium sp.                      |
| Firmicutes        | Clostridiales sp. CAG:31                        |
| Firmicutes        | Ruminococcus sp. CAG3                           |
| Firmicutes        | Ruminococcus lactaris                           |
| Bacteroidota      | Bacteroidaceae sp. CAG1                         |
| Firmicutes        | Acidiphilium sp. CAG:1                          |
| Firmicutes        | Faecalibacterium prausnitzii                    |
| Bacteroidota      | Paraprevotella sp. CAG1                         |
| Firmicutes        | Clostridium sp. CAG:265                         |
| Firmicutes        | Faecalibacterium prausnitzii                    |
| Actinobacteriota  | Bifidobacterium adolescentis                    |
| Bacteroidota      | Paraprevotella clara CAG:116                    |
| Bacteroidota      | Bacteroides sp. CAG:1076                        |
| Firmicutes        | Clostridiales sp. CAG:21                        |
| Firmicutes        | Firmicutes bacterium                            |
| Firmicutes        | Eubacterium sp. CAG:251                         |
| Verrucomicrobiota | Opitutales sp. CAG:2                            |
| Firmicutes        | Christensenellales sp. CAG4                     |
| Firmicutes        | Eubacterium sp. CAG:3                           |
| Actinobacteria    | uncultured Eggerthella sp. CAG2                 |
| Firmicutes        | Eubacterium rectale                             |

|                   |                                            |
|-------------------|--------------------------------------------|
| Actinobacteriota  | Eggerthella sp. CAG:209                    |
| Firmicutes        | Anaerovoracaceae sp. CAG2                  |
| Proteobacteria    | Sutterella parvirubra                      |
| Firmicutes        | Firmicutes bacterium CAG:341               |
| Firmicutes        | Oscillibacter sp. CAG3                     |
| Firmicutes        | Veillonella parvula                        |
| Proteobacteria    | Azospirillum sp. CAG:239                   |
| Firmicutes        | Lachnospiraceae bacterium OM04-12BH        |
| Bacteroidota      | uncultured Bacteroides sp.                 |
| Cyanobacteria     | Cyanobacteria bacterium UBA10660           |
| Firmicutes        | Clostridiales sp. CAG:29                   |
| Proteobacteria    | Raoultella ornithinolytica                 |
| Firmicutes        | uncultured Ruminococcus sp.                |
| Firmicutes        | Lactobacillus salivarius                   |
| Firmicutes        | Streptococcus infantarius                  |
| Firmicutes        | Ruminococcaceae sp. CAG19                  |
| Firmicutes        | uncultured Clostridium sp.                 |
| Firmicutes        | Eubacterium ventriosum                     |
| Firmicutes        | Hungatella hathewayi                       |
| Actinobacteria    | uncultured Olsenella sp. CAG1              |
| Bacteroidota      | Bacteroides sp. CAG:598                    |
| Bacteroidota      | Muribaculaceae sp. CAG5                    |
| Firmicutes        | Enterocloster bolteae                      |
| Firmicutes        | Mitsuokella multacida                      |
| Firmicutes        | uncultured Blautia sp.                     |
| Firmicutes        | Butyricoccus sp. AM28-25                   |
| Firmicutes        | Ruminiclostridium sp. CAG1                 |
| Firmicutes        | Firmicutes bacterium CAG:345               |
| Fusobacteriota    | Fusobacterium mortiferum                   |
| Bacteroidota      | Bacteroides sp. AM16-15                    |
| Firmicutes        | Ruminococcaceae sp. CAG7                   |
| Firmicutes        | uncultured Ruminococcus sp.                |
| Firmicutes        | Streptococcus anginosus                    |
| Firmicutes        | Lachnospiraceae bacterium AM48-27BH        |
| Firmicutes        | Eubacterium sp. CAG:4                      |
| Actinobacteriota  | Eggerthella lenta                          |
| Firmicutes        | Ruminococcaceae sp. CAG17                  |
| Firmicutes        | Clostridiales sp. CAG:26                   |
| Firmicutes        | Clostridiales bacterium                    |
| Firmicutes        | Eubacterium sp. CAG:274                    |
| Bacteroidota      | Muribaculaceae bacterium Isolate-102 (HZI) |
| Firmicutes        | Roseburia sp. CAG:182                      |
| Firmicutes        | Bacilli sp. CAG1                           |
| Bacteroidota      | Bacteroides uniformis                      |
| Verrucomicrobiota | Akkermansia sp. BIOML-A61                  |
| Firmicutes        | Lachnospiraceae bacterium                  |
| Firmicutes        | Eubacterium sp. CAG:76                     |
| Firmicutes        | Anaerotruncus sp. CAG:528                  |
| Verrucomicrobiota | Verrucomicrobia bacterium CAG:312_58_20    |
| Firmicutes        | Clostridiales sp. CAG:20                   |
| Firmicutes        | Clostridium sp. CAG:417                    |
| Firmicutes        | Clostridia bacterium                       |
| Firmicutes        | Clostridium sp. TM06-18                    |
| Firmicutes        | uncultured Clostridiales sp. CAG:32        |
| Firmicutes        | Clostridium sp. CAG:628                    |
| Firmicutes        | Clostridia bacterium                       |
| Firmicutes        | Massilimicrobiota sp. An134                |
| Firmicutes        | Clostridium sp. CAG:7                      |

|                |                                |
|----------------|--------------------------------|
| Firmicutes     | Streptococcus thermophilus     |
| Firmicutes     | Clostridiales sp. CAG:25       |
| Bacteroidota   | Parabacteroides johnsonii      |
| Firmicutes     | uncultured Clostridium sp.     |
| Firmicutes     | Clostridium sp. CAG:9          |
| Bacteroidota   | Prevotella copri               |
| Firmicutes     | Clostridiales sp. CAG:19       |
| Firmicutes     | Faecalibacterium prausnitzii   |
| Firmicutes     | Clostridiales sp. CAG:37       |
| Firmicutes     | Holdemanella biformis          |
| Firmicutes     | Dialister succinatiphilus      |
| Bacteroidota   | Prevotella sp. CAG:1058        |
| Firmicutes     | Lachnospiraceae bacterium      |
| Firmicutes     | Angelakisella sp.CAG2          |
| Firmicutes     | Firmicutes bacterium CAG:176   |
| Bacteroidota   | Parabacteroides gordonii       |
| Firmicutes     | Oscillibacter sp. CAG5         |
| Firmicutes     | Clostridiales bacterium        |
| Firmicutes     | uncultured Eubacterium sp.     |
| Firmicutes     | Ruminococcus bromii            |
| Bacteroidota   | Prevotella sp. 885             |
| Proteobacteria | Sutterella sp. CAG2            |
| Firmicutes     | Oscillibacter sp.              |
| Firmicutes     | Coprobacillus cateniformis     |
| Firmicutes     | Butyrivibrio sp. CAG:318       |
| Firmicutes     | Ruminococcus sp.               |
| Firmicutes     | Clostridium sp. CAG:964        |
| Firmicutes     | Veillonella sp. CAG:1          |
| Firmicutes     | uncultured Ruminococcus sp.    |
| Firmicutes     | Eubacterium sp. CAG:180        |
| Bacteroidota   | Prevotella sp. CAG1            |
| Synergistota   | Synergistes sp. 3_1_syn1       |
| Firmicutes     | Dialister sp.                  |
| Firmicutes     | Hungatella hathewayi           |
| Proteobacteria | Sutterella sp. CAG1            |
| Firmicutes     | Firmicutes bacterium AM10-47   |
| Proteobacteria | Klebsiella pneumoniae          |
| Proteobacteria | Klebsiella oxytoca             |
| Firmicutes     | Clostridium sp. CAG:568        |
| Firmicutes     | Ruminococcus gnavus            |
| Firmicutes     | Eubacterium sp. CAG:1          |
| Firmicutes     | Clostridiales bacterium        |
| Firmicutes     | Eubacterium sp. CAG:252        |
| Firmicutes     | Firmicutes bacterium CAG:238   |
| Firmicutes     | Lawsonibacter asaccharolyticus |
| Bacteroidota   | Bacteroides plebeius           |
| Actinobacteria | uncultured Eggerthella sp.CAG1 |
| Bacteroidota   | Alistipes sp. AF17-16          |
| Bacteroidota   | Alistipes sp. CAG:1            |
| Firmicutes     | Oscillibacter sp.              |
| Firmicutes     | Clostridium sp. CAG:914        |
| Proteobacteria | Azospirillum sp. 51_20         |
| Bacteroidota   | Parabacteroides sp. CAG1       |
| Firmicutes     | Clostridiales sp. CAG:50       |
| Firmicutes     | Coprobacillus sp. 8_1_38FAA    |
| Firmicutes     | Ruminococcus sp. CAG2          |
| Firmicutes     | Eubacterium ramulus            |
| Firmicutes     | Oscillibacter sp.              |

|                   |                                     |
|-------------------|-------------------------------------|
| Bacteroidota      | Bacteroides sp. CAG:2               |
| Firmicutes        | Clostridiales bacterium             |
| Firmicutes        | Clostridium sp. CAG:590             |
| Firmicutes        | uncultured Ruminococcaceae sp.CAG1  |
| Proteobacteria    | Haemophilus parainfluenzae          |
| Verrucomicrobiota | Lentisphaeria sp. CAG2              |
| Firmicutes        | Clostridiales bacterium             |
| Firmicutes        | uncultured Blautia sp.              |
| Firmicutes        | Oscillospiraceae sp. CAG2           |
| Firmicutes        | Firmicutes bacterium                |
| Firmicutes        | Ruminococcaceae sp. CAG10           |
| Actinobacteriota  | Eggerthella sp. CAG:298             |
| Firmicutes        | Coprococcus eutactus                |
| Firmicutes        | Clostridium innocuum                |
| Cyanobacteria     | Fusobacterium sp. CAG:815           |
| Firmicutes        | Ruminococcaceae sp. CAG2            |
| Bacteroidota      | Prevotella stercorea                |
| Firmicutes        | Clostridiales bacterium             |
| Firmicutes        | Firmicutes bacterium CAG:110        |
| Firmicutes        | uncultured Ruminococcus sp.         |
| Firmicutes        | Lactobacillus rhamnosus             |
| Firmicutes        | Faecalibacterium prausnitzii        |
| Firmicutes        | Clostridium sp. CAG:5               |
| Bacteroidota      | Bacteroides fragilis                |
| Firmicutes        | uncultured Roseburia sp.            |
| Bacteroidota      | Butyrivimonas sp. CAG1              |
| Desulfobacterota  | Desulfovibrio fairfieldensis        |
| Firmicutes        | Fusicatenibacter saccharivorans     |
| Firmicutes        | Eubacterium sp. CAG:786             |
| Firmicutes        | Clostridium sp. CAG:3               |
| Firmicutes        | Firmicutes bacterium CAG:24053_14   |
| Firmicutes        | Acidaminococcus sp. CAG:542         |
| Bacteroidota      | Alistipes putredinis                |
| Firmicutes        | Lactobacillus gasseri               |
| Firmicutes        | Eubacterium sp. CAG:581             |
| Firmicutes        | Streptococcus parasanguinis         |
| Firmicutes        | Ruminococcaceae bacterium AM28-23LB |
| Bacteroidota      | Bacteroides sp. CAG:1               |
| Bacteroidota      | Muribaculaceae sp. CAG3             |
| Firmicutes        | Eubacterium sp. CAG:5               |
| Firmicutes        | Enterococcus faecalis               |
| Actinobacteriota  | Asaccharobacter celatus             |
| Firmicutes        | Clostridium sp. TM06-18             |
| Bacteroidota      | Bacteroides sp. AF16-49             |
| Firmicutes        | Clostridiales sp. CAG:39            |
| Firmicutes        | Clostridiales sp. CAG:24            |
| Bacteroidota      | Bacteroides oleiciplenus            |
| Firmicutes        | uncultured Clostridium sp.          |
| Firmicutes        | Enterococcus avium                  |
| Firmicutes        | Clostridiales sp. CAG:48            |
| Firmicutes        | Ruminococcaceae sp. CAG13           |
| Firmicutes        | Clostridium sp. CAG:10              |
| Bacteroidota      | Prevotella sp. CAG:255              |
| Firmicutes        | Oscillibacter sp. CAG2              |
| Proteobacteria    | Enterobacter cloacae                |
| Firmicutes        | Clostridiales sp. CAG:13            |
| Firmicutes        | Eubacterium sp. CAG:2               |

|                   |                                      |
|-------------------|--------------------------------------|
| Firmicutes        | Clostridiales sp. CAG:16             |
| Firmicutes        | Ruminococcaceae sp. CAG11            |
| Firmicutes        | Ruminococcaceae sp. CAG20            |
| Bacteroidota      | Bacteroidales bacterium 55_9         |
| Bacteroidetes     | uncultured Flavobacteriales sp. CAG2 |
| Firmicutes        | Clostridiales bacterium              |
| Bacteroidota      | Bacteroides finegoldii               |
| Firmicutes        | Ektepia gabavorous                   |
| Firmicutes        | Megamonas rupellensis                |
| Firmicutes        | Intestinibacter bartlettii           |
| Firmicutes        | Eubacterium sp. CAG:38               |
| Firmicutes        | Clostridiales sp. CAG:11             |
| Firmicutes        | uncultured Cellulosilyticum sp. CAG1 |
| Bacteroidota      | Bacteroides fragilis                 |
| Firmicutes        | Roseburia inulinivorans              |
| Firmicutes        | Firmicutes bacterium CAG:129         |
| Firmicutes        | Flavonifractor plautii               |
| Firmicutes        | Ruminococcaceae sp. CAG8             |
| Firmicutes        | uncultured Oscillibacter sp.         |
| Firmicutes        | Coprobacillus sp. CAG:605            |
| Firmicutes        | Hungatella hathewayi                 |
| Actinobacteriota  | uncultured Olsenella sp. CAG1        |
| Bacteroidota      | Butyricimonas virosa                 |
| Firmicutes        | Roseburia sp. CAG:1                  |
| Actinobacteriota  | Eggerthella sp. CAG:1427             |
| Firmicutes        | Acholeplasmatales bacterium          |
| Firmicutes        | Lactobacillus oris                   |
| Firmicutes        | Clostridiales sp. CAG:18             |
| Firmicutes        | Ruminococcaceae bacterium            |
| Firmicutes        | Clostridiales bacterium              |
| Verrucomicrobiota | Akkermansia muciniphila              |
| Firmicutes        | Acidiphilium sp. CAG:727             |
| Firmicutes        | Christensenellales sp. CAG1          |
| Firmicutes        | Roseburia sp. CAG:303                |
| Firmicutes        | Clostridiales sp. CAG:34             |
| Verrucomicrobiota | Lentisphaeria sp. CAG1               |
| Firmicutes        | Ruminococcus sp. AF21-42             |
| Firmicutes        | Acidaminococcus sp. CAG:542          |
| Firmicutes        | Eubacterium sp. OM08-24              |
| Proteobacteria    | Sutterella sp. AM11-39               |
| Firmicutes        | Streptococcus mutans                 |
| Euryarchaeota     | Methanobrevibacter sp. CAG1          |
| Firmicutes        | Christensenellales sp. CAG5          |
| Firmicutes        | Clostridium sp. CAG:242              |
| Firmicutes        | Ruminococcaceae bacterium            |
| Firmicutes        | Firmicutes bacterium CAG:176_63_11   |
| Firmicutes        | Coprobacillus sp. AM29-13            |
| Firmicutes        | Coprococcus sp. OM04-5BH             |
| Proteobacteria    | Sutterella sp. CAG4                  |
| Firmicutes        | Eubacterium sp. CAG:274              |
| Firmicutes        | Clostridiales bacterium              |
| Bacteroidota      | Alistipes sp.                        |
| Firmicutes        | Eisenbergiella sp. OF01-20           |
| Firmicutes        | Bacilli sp. CAG3                     |
| Fusobacteriota    | Fusobacterium ulcerans               |
| Firmicutes        | Clostridium sp. CAG:11               |
| Actinobacteriota  | Cryptobacterium sp. CAG:338          |
| Bacteroidota      | Parabacteroides merdae               |

|                   |                                    |
|-------------------|------------------------------------|
| Firmicutes        | Oscillibacter sp. CAG4             |
| Firmicutes        | Clostridiales sp. CAG:28           |
| Firmicutes        | Roseburia intestinalis             |
| Firmicutes        | Clostridiales sp. CAG:8            |
| Firmicutes        | Clostridium sp. CAG:533            |
| Bacteroidota      | Bacteroides thetaiotaomicron       |
| Verrucomicrobiota | Akkermansia muciniphila            |
| Firmicutes        | uncultured Ruminococcus sp.        |
| Synergistota      | Pyramidobacter piscolens           |
| Firmicutes        | Ruminococcaceae sp. CAG21          |
| Firmicutes        | Mycoplasma sp. CAG:956             |
| Bacteroidota      | Alistipes sp. CAG:4                |
| Bacteroidota      | Bacteroides caccae                 |
| Firmicutes        | Clostridium sp. CAG:524            |
| Verrucomicrobiota | Victivallis sp. CAG:1              |
| Firmicutes        | Lactobacillus amylovorus           |
| Firmicutes        | Clostridiales bacterium            |
| Firmicutes        | Megasphaera elsdenii               |
| Bacteroidota      | Prevotella sp. CAG:592             |
| Firmicutes        | Roseburia hominis                  |
| Firmicutes        | Oscillibacter sp. 57_20            |
| Firmicutes        | Lachnospiraceae bacterium          |
| Firmicutes        | Clostridium sp. AM27-31LB          |
| Firmicutes        | Oscillospiraceae sp. CAG4          |
| Firmicutes        | Clostridiales bacterium            |
| Proteobacteria    | Desulfovibrio desulfuricans        |
| Firmicutes        | Eubacterium sp. CAG:6              |
| Firmicutes        | Tyzzrella nexilis                  |
| Firmicutes        | Ruminococcaceae sp. CAG12          |
| Firmicutes        | Ruminococcus sp. CAG:330           |
| Firmicutes        | Ruminococcaceae sp. CAG1           |
| Firmicutes        | Enterococcus casseliflavus         |
| Proteobacteria    | Enterobacter asburiae              |
| Bacteroidetes     | Butyricimonas synergistica         |
| Firmicutes        | Clostridiales sp. CAG:45           |
| Firmicutes        | Hungatella hathewayi               |
| Firmicutes        | Anaerostipes hadrus                |
| Firmicutes        | Oscillibacter sp. CAG1             |
| Proteobacteria    | Sutterella megalosphaeroides       |
| Firmicutes        | Mycoplasma sp. CAG:611             |
| Firmicutes        | Ruminococcaceae bacterium          |
| Bacteroidota      | Bacteroides intestinalis           |
| Bacteroidota      | Alistipes timonensis               |
| Firmicutes        | Clostridium sp. CAG:167            |
| Firmicutes        | Lawsonibacter sp. CAG1             |
| Bacteroidota      | Muribaculaceae sp. CAG1            |
| Firmicutes        | Clostridium sp. OM07-9AC           |
| Firmicutes        | Roseburia sp. OF03-24              |
| Firmicutes        | Lachnospiraceae bacterium AM40-2BH |
| Euryarchaeota     | Methanosphaera cuniculi            |
| Firmicutes        | Dorea sp. CAG:317                  |
| Firmicutes        | Ruminococcus sp. CAG1              |
| Firmicutes        | Clostridium sp. CAG:413            |
| Firmicutes        | Blautia obeum                      |
| Firmicutes        | uncultured Lachnospira sp.         |
| Firmicutes        | Ruminococcaceae sp. CAG15          |
| Actinobacteriota  | Coriobacteriia sp.CAG1             |

|                   |                                     |
|-------------------|-------------------------------------|
| Proteobacteria    | Sutterella wadsworthensis           |
| Bacteroidota      | Alistipes sp. CAG:435               |
| Firmicutes        | Ruminococcaceae bacterium           |
| Verrucomicrobiota | Lentisphaeria bacterium             |
| Firmicutes        | Clostridium sp. CAG:288             |
| Actinobacteriota  | Olsenella sp. AF21-51               |
| Proteobacteria    | Sutterella sp. CAG:397              |
| Proteobacteria    | Klebsiella grimontii                |
| Firmicutes        | Dorea sp. OM07-5                    |
| Firmicutes        | Firmicutes bacterium CAG:552_39_19  |
| Firmicutes        | Enterococcus mundtii                |
| Firmicutes        | Eisenbergiella tayi                 |
| Firmicutes        | Bacteroides pectinophilus           |
| Bacteroidota      | Prevotella sp. CAG:891              |
| Bacteroidota      | Odoribacter splanchnicus            |
| Firmicutes        | unclutured Alistipes sp. CAG:5      |
| Firmicutes        | Lactobacillus gasseri               |
| Firmicutes        | Ruminococcaceae sp. CAG14           |
| Firmicutes        | Clostridium sp. CAG:12              |
| Firmicutes        | Ruminococcus sp. CAG:403            |
| Bacteroidota      | Prevotella sp. CAG2                 |
| Firmicutes        | Lachnospiraceae sp. CAG1            |
| Desulfobacterota  | Desulfovibrio piger                 |
| Firmicutes        | Ruminococcaceae bacterium           |
| Firmicutes        | Oscillospiraceae sp. CAG6           |
| Firmicutes        | Ruminococcus sp. AF37-6AT           |
| Firmicutes        | Clostridiales sp. CAG:38            |
| Firmicutes        | Clostridium sp. CAG:8               |
| Firmicutes        | Clostridiales sp. CAG:10            |
| Desulfobacterota  | Desulfovibrio sp.                   |
| Firmicutes        | unnamed Ruminococcaceae sp. CAG1    |
| Bacteroidota      | Bacteroides sp. OF04-15BH           |
| Firmicutes        | Ruminococcus sp. CAG:579            |
| Firmicutes        | Faecalibacterium prausnitzii        |
| Firmicutes        | Oscillospiraceae sp. CAG1           |
| Firmicutes        | Clostridiales sp. CAG:49            |
| Actinobacteria    | Collinsella intestinalis            |
| Firmicutes        | Lachnospiraceae bacterium OF09-33XD |
| Firmicutes        | uncultured Ruminococcaceae sp.CAG2  |
| Firmicutes        | Ruminococcus sp. CAG:624            |
| Bacteroidota      | Alistipes dispar                    |
| Verrucomicrobia   | uncultured Verrucomicrobia sp. CAG2 |
| Firmicutes        | Ruminococcus torques                |
| Proteobacteria    | Haemophilus parainfluenzae          |
| Firmicutes        | Eubacterium sp. CAG:86              |
| Firmicutes        | Faecalibacterium prausnitzii        |
| Firmicutes        | Turicibacter sanguinis              |
| Firmicutes        | unclutured Clostridium sp. CAG:9    |
| Bacteroidota      | Prevotella sp. CAG3                 |
| Bacteroidota      | Bacteroides vulgatus                |
| Firmicutes        | Clostridium sp. AM28-20LB           |
| Firmicutes        | Clostridiales bacterium             |
| Firmicutes        | Anaerotruncus sp. CAG:528           |
| Firmicutes        | Tyzzereella sp.                     |
| Firmicutes        | Lactobacillus fermentum             |
| Firmicutes        | Phascolarctobacterium sp. CAG:207   |

|                   |                                               |
|-------------------|-----------------------------------------------|
| Proteobacteria    | <i>Pseudomonas helleri</i>                    |
| Firmicutes        | <i>Roseburia faecis</i>                       |
| Firmicutes        | <i>Ruminococcus</i> sp. CAG1                  |
| Bacteroidota      | <i>Bacteroides clarus</i>                     |
| Bacteroidota      | Prevotellaceae bacterium                      |
| Firmicutes        | <i>Dialister</i> sp. CAG:357                  |
| Firmicutes        | Candidatus <i>Borkfalkia ceftriaxoniphila</i> |
| Firmicutes        | <i>Clostridium</i> sp. CAG:307                |
| Firmicutes        | <i>Clostridiales</i> sp. CAG:14               |
| Bacteroidota      | <i>Butyricimonas faecalis</i>                 |
| Actinobacteriota  | <i>Collinsella aerofaciens</i>                |
| Euryarchaeota     | <i>Methanosphaera</i> sp. A6                  |
| Bacteroidota      | Muribaculaceae sp. CAG2                       |
| Firmicutes        | <i>Clostridium</i> sp. CAG:230                |
| Firmicutes        | Firmicutes bacterium CAG:124                  |
| Firmicutes        | <i>Ruminococcus</i> sp. CAG:382               |
| Firmicutes        | <i>Christensenellales</i> sp. CAG2            |
| Bacteroidota      | <i>Prevotella</i> sp. CAG:520                 |
| Firmicutes        | <i>Lactobacillus mucosae</i>                  |
| Firmicutes        | <i>Clostridium</i> sp. CAG:632                |
| Verrucomicrobiota | <i>Victivallis vadensis</i>                   |
| Bacteroidota      | <i>Alistipes</i> sp. CAG:1                    |
| Firmicutes        | <i>Clostridiaceae</i> bacterium OM02-2AC      |
| Firmicutes        | <i>Blautia obeum</i>                          |
| Actinobacteria    | uncultured <i>Coriobacteriia</i> sp. CAG1     |
| Firmicutes        | uncultured <i>Clostridium</i> sp.             |
| Firmicutes        | <i>Blautia</i> sp. KGMB01111                  |
| Firmicutes        | <i>Ruthenibacterium lactatiformans</i>        |
| Firmicutes        | <i>Clostridiales</i> sp. CAG:42               |
| Firmicutes        | Firmicutes bacterium CAG:534                  |
| Firmicutes        | <i>Clostridium</i> sp. CAG:13                 |
| Firmicutes        | uncultured <i>Prevotella</i> sp. CAG:1        |
| Bacteroidota      | <i>Parabacteroides merdae</i>                 |
| Proteobacteria    | Burkholderiales bacterium                     |
| Firmicutes        | <i>Clostridia</i> sp. CAG1                    |
| Firmicutes        | <i>Dialister invisus</i>                      |
| Firmicutes        | <i>Eubacterium</i> sp. CAG:841                |
| Firmicutes        | <i>Dialister succinatiphilus</i>              |
| Synergistota      | <i>Cloacibacillus</i> sp. CAG1                |
| Firmicutes        | <i>Weissella cibaria</i>                      |
| Firmicutes        | uncultured <i>Clostridium</i> sp.             |
| Actinobacteriota  | <i>Bifidobacterium longum</i>                 |
| Firmicutes        | <i>Oscillospiraceae</i> sp. CAG3              |
| Firmicutes        | <i>Mycoplasma</i> sp. CAG:1                   |
| Firmicutes        | <i>Clostridiales</i> sp. CAG:3                |
| Firmicutes        | <i>Clostridium</i> sp. CAG:510                |
| Bacteroidota      | <i>Parabacteroides distasonis</i>             |
| Bacteroidota      | <i>Alistipes communis</i>                     |
| Proteobacteria    | <i>Acetobacter</i> sp. 46_36                  |
| Firmicutes        | <i>Clostridium</i> sp. CAG:6                  |
| Euryarchaeota     | <i>Methanobrevibacter woesei</i>              |
| Firmicutes        | Ruminococcaceae bacterium                     |
| Firmicutes        | <i>Clostridiales</i> sp. CAG:41               |
| Firmicutes        | <i>Clostridiales</i> sp. CAG:22               |
| Firmicutes        | <i>Clostridiales</i> sp. CAG:36               |
| Firmicutes        | <i>Clostridium</i> sp. CAG:2                  |
| Firmicutes        | <i>Coprococcus eutactus</i> CAG:665           |
| Proteobacteria    | Proteobacteria bacterium CAG:139              |



|                             |                                              |
|-----------------------------|----------------------------------------------|
| Proteobacteria              | Sutterella sp. AM11-39                       |
| Firmicutes                  | Ruminococcaceae sp. CAG22                    |
| Firmicutes                  | Streptococcus salivarius                     |
| Firmicutes                  | uncultured Ruminococcus sp.                  |
| Firmicutes                  | uncultured Flavonifractor sp.                |
| Firmicutes                  | Bacillus velezensis                          |
| Firmicutes                  | Ruminococcus sp. AF20-12LB                   |
| Verrucomicrobiota           | Verrucomicrobia bacterium CAG:312_58_20      |
| Firmicutes                  | unclutured Clostridiales sp. CAG:26          |
| Proteobacteria              | Leclercia adecarboxylata                     |
| Firmicutes                  | uncultured Clostridium sp.                   |
| Firmicutes                  | Clostridium sp. CAG:4                        |
| Firmicutes                  | Coprococcus sp. BIOML-A1                     |
| Bacteroidota                | Prevotella sp.                               |
| Firmicutes                  | Clostridiales bacterium                      |
| Firmicutes                  | Catenibacterium sp. AM22-15                  |
| Proteobacteria              | Klebsiella oxytoca                           |
| Firmicutes                  | Enterococcus asini                           |
| Bacteroidota                | Bacteroides fluxus                           |
| Firmicutes                  | Firmicutes bacterium CAG:110                 |
| Firmicutes                  | Clostridium sp. CAG:594                      |
| Elusimicrobia               | uncultured Elusimicrobium sp. CAG1           |
| Bacteroidota                | Prevotella copri                             |
| Firmicutes                  | Clostridium sp. AF20-17LB                    |
| Firmicutes                  | Oscillibacter sp.                            |
| Firmicutes                  | Clostridiales sp. CAG:12                     |
| Firmicutes                  | Oscillibacter sp.                            |
| Bacteroidota                | Alistipes sp. CAG:2                          |
| Bacteroidota                | Bacteroides sp. CAG:530                      |
| Firmicutes                  | Anaerostipes hadrus                          |
| Bacteroidota                | Bacteroides salyersiae                       |
| Firmicutes                  | Streptococcus vestibularis                   |
| Firmicutes                  | Firmicutes bacterium                         |
| Actinobacteriota            | Collinsella sp. AM34-10                      |
| Bacteroidota                | Flavobacteriales bacterium                   |
| Firmicutes                  | Clostridium sp. OM05-6BH                     |
| Firmicutes                  | Eubacterium sp.                              |
| Bacteroidota                | Parabacteroides sp. AM58-2XD                 |
| Bacteroidota                | Flavobacteriales sp. CAG1                    |
| Firmicutes                  | Dorea sp. OM02-2LB                           |
| Actinobacteriota            | Bifidobacterium animalis                     |
| Firmicutes                  | Clostridiales sp. CAG:17                     |
| Bacteroidota                | Flavobacteriales sp. CAG2                    |
| Candidatus Thermoplasmatota | unclutured Methanomassiliicoccaceae sp. CAG1 |
| Firmicutes                  | Selenomonadales bacterium                    |
| Firmicutes                  | Faecalibacterium prausnitzii                 |
| Firmicutes                  | Clostridiales sp. CAG:44                     |
| Firmicutes                  | uncultured Ruminococcus sp.                  |
| Firmicutes                  | Clostridiales bacterium                      |
| Bacteroidota                | uncultured CAG1                              |
| Firmicutes                  | Lachnospiraceae bacterium                    |
| Firmicutes                  | Phascolarctobacterium sp. CAG:266            |
| Actinobacteriota            | Bifidobacterium pseudocatenulatum            |
| Firmicutes                  | Gemmiger sp. CAG2                            |
| Actinobacteriota            | Coriobacteriia bacterium                     |
| Firmicutes                  | Firmicutes bacterium CAG:170                 |
| Firmicutes                  | Blautia sp. OM07-19                          |
| Firmicutes                  | Eubacterium sp. AM28-29                      |

|                   |                                        |
|-------------------|----------------------------------------|
| Bacteroidota      | Prevotella sp. CAG:474                 |
| Bacteroidota      | Prevotella sp. CAG:5226                |
| Firmicutes        | Lachnospiraceae bacterium              |
| Firmicutes        | Clostridiales sp. CAG:15               |
| Verrucomicrobiota | Opitutales sp. CAG:1                   |
| Actinobacteria    | Actinomyces radidentis                 |
| Firmicutes        | Pseudoflavonifractor sp. An184         |
| Bacteroidota      | Bacteroides ovatus                     |
| Firmicutes        | uncultured Ruminococcus sp.            |
| Firmicutes        | Blautia sp. CAG:257                    |
| Firmicutes        | Clostridium sp. AF27-2AA               |
| Bacteroidota      | Prevotella sp. CAG:1031                |
| Firmicutes        | Firmicutes bacterium CAG:124           |
| Firmicutes        | Ruminococcus sp. OM06-36AC             |
| Bacteroidota      | Bacteroides plebeius                   |
| Firmicutes        | Clostridiales bacterium                |
| Firmicutes        | Dorea longicatena                      |
| Firmicutes        | Gemmiger sp. CAG1                      |
| Firmicutes        | Clostridiales sp. CAG:7                |
| Firmicutes        | Gemmiger sp. CAG5                      |
| Firmicutes        | Ruminococcaceae sp. CAG18              |
| Verrucomicrobiota | Victivallis sp. CAG:2                  |
| Firmicutes        | Firmicutes bacterium CAG:83            |
| Firmicutes        | Ruminococcaceae sp. CAG9               |
| Proteobacteria    | Enterobacteriaceae bacterium 9_2_54FAA |
| Firmicutes        | Flavonifractor sp. CAG1                |
| Firmicutes        | Ruminococcus sp. CAG4                  |
| Firmicutes        | Clostridiales sp. CAG:2                |
| Firmicutes        | Phascolarctobacterium succinatutens    |
| Firmicutes        | Oscillibacter sp.                      |
| Firmicutes        | Ruminococcus sp. AF46-10NS             |
| Firmicutes        | Pseudoflavonifractor sp. An184         |
| Firmicutes        | Dialister sp. CAG1                     |
| Firmicutes        | Ruminococcaceae sp. CAG6               |
| Firmicutes        | Clostridiales bacterium                |
| Proteobacteria    | Escherichia coli                       |
| Firmicutes        | Butyrivibrio sp.                       |
| Firmicutes        | Clostridium perfringens                |
| Firmicutes        | uncultured Firmicutes sp. CAG1         |
| Firmicutes        | Clostridiales sp. CAG:33               |
| Firmicutes        | Firmicutes bacterium                   |
| Firmicutes        | Ruminococcaceae sp. CAG5               |
| Firmicutes        | Eubacterium sp. CAG:115                |
| Verrucomicrobia   | uncultured Verrucomicrobia sp. CAG1    |
| Firmicutes        | Ruminococcaceae sp. CAG16              |
| Firmicutes        | Clostridiales sp. CAG:27               |
| Bacteroidota      | Alistipes sp. CAG:435                  |
| Firmicutes        | Oscillibacter sp. CAG1                 |
| Firmicutes        | Eubacterium sp.                        |
| Firmicutes        | Turicibacter sanguinis                 |
| Bacteroidota      | Bacteroides eggerthii                  |
| Firmicutes        | Roseburia sp. CAG1                     |
| Firmicutes        | Subdoligranulum sp. CAG:314            |
| Firmicutes        | Oscillibacter sp.                      |
| Proteobacteria    | Azospirillum sp.                       |
| Firmicutes        | Firmicutes bacterium CAG:137           |
| Firmicutes        | uncultured Eubacterium sp.             |
| Firmicutes        | Clostridium sp. CAG:1                  |

|                   |                                                |
|-------------------|------------------------------------------------|
| Proteobacteria    | Succinatimonas sp. CAG:777                     |
| Firmicutes        | Lactococcus garvieae                           |
| Verrucomicrobiota | Coraliomargarita sp. CAG:312                   |
| Firmicutes        | Roseburia sp. CAG:2                            |
| Bacteroidota      | Alistipes onderdonkii                          |
| Bacteroidota      | Bacteroides coprophilus                        |
| Firmicutes        | Romboutsia ilealis                             |
| Firmicutes        | Clostridium sp. CAG:452                        |
| Firmicutes        | Clostridiales sp. CAG:46                       |
| Actinobacteriota  | Collinsella aerofaciens                        |
| Firmicutes        | Gemmiger sp. CAG4                              |
| Firmicutes        | Firmicutes bacterium CAG:321                   |
| Firmicutes        | Dorea longicatena                              |
| Firmicutes        | Clostridiales sp. CAG:43                       |
| Firmicutes        | Ruminococcaceae bacterium                      |
| Firmicutes        | Clostridiales sp. CAG:1                        |
| Firmicutes        | Clostridium sp. CAG:226                        |
| Bacteroidota      | Alistipes shahii                               |
| Firmicutes        | Lachnospira eligens                            |
| Firmicutes        | Gemmiger sp. CAG3                              |
| Cyanobacteria     | Candidatus Gastranaerophilales bacterium HUM_2 |
| Bacteroidota      | Alistipes finegoldii CAG:68                    |
| Firmicutes        | Megasphaera sp. NM10                           |
| Firmicutes        | Eubacterium sp. CAG:156                        |
| Proteobacteria    | Enterobacter cloacae                           |
| Firmicutes        | Streptococcus downei                           |
| Firmicutes        | Clostridiales sp. CAG:32                       |
| Firmicutes        | Subdoligranulum sp. 60_17                      |
| Firmicutes        | Ruminococcus sp. CAG:379                       |
| Bacteroidota      | Prevotella sp. AG:487_50_53                    |
| Firmicutes        | Acholeplasma sp. CAG:878                       |
| Proteobacteria    | uncultured Alphaproteobacteria sp. CAG1        |
| Bacteroidota      | Prevotella sp. BCRC 81118                      |
| Firmicutes        | Clostridia bacterium                           |
| Proteobacteria    | Mesosutterella multiformis                     |
| Thermoplasmatota  | Methanomassiliicoccaceae sp. CAG1              |
| Bacteroidota      | Prevotella sp. CAG:279                         |
| Firmicutes        | Ruminococcus sp. CAG:563                       |
| Firmicutes        | Clostridium sp. OM07-9AC                       |
| Firmicutes        | Clostridium sp. CAG:762                        |
| Desulfobacterota  | Bilophila wadsworthia                          |
| Firmicutes        | uncultured Pseudoflavonifractor sp. CAG1       |
| Bacteroidota      | Alistipes timonensis                           |
| Firmicutes        | uncultured Clostridium sp.                     |
| Firmicutes        | Butyricimonas sp. CAG1                         |
| Bacteroidota      | Paraprevotella xylaniphila                     |
| Firmicutes        | Ruminococcaceae bacterium                      |
| Firmicutes        | uncultured Clostridium sp.                     |
| Firmicutes        | Gemmiger sp. An50                              |
| Firmicutes        | Clostridium spiroforme                         |
| Firmicutes        | Clostridium sp. CAG:169                        |
| Firmicutes        | Firmicutes bacterium CAG:272                   |
| Bacteroidota      | Prevotella sp. CAG:1320                        |
| Firmicutes        | uncultured Blautia sp.                         |
| Firmicutes        | uncultured Ruminococcus sp.                    |
| Bacteroidota      | Coprobacter fastidiosus                        |

Actinobacteriota  
Firmicutes  
Firmicutes  
Proteobacteria  
Firmicutes  
Proteobacteria  
Proteobacteria

uncultured Collinsella sp.  
Veillonella dispar  
Ruminococcaceae sp. CAG3  
Desulfovibrio sp. AM18-2  
Peptococcus sp. CAG:1  
Proteobacteria bacterium CAG:495  
Bilophila sp. 4\_1\_30

Supplementary Table 5 Significant differential indicators for asthma identified during/after the trial Remarks: P, Probio-M8 group; C, placebo group; A, 0d; B, 1M; C, 3M

| <b>Probiotic group</b>                                             |                   |         |         |       |       |       |                 |          |          |
|--------------------------------------------------------------------|-------------------|---------|---------|-------|-------|-------|-----------------|----------|----------|
| Differential indicators                                            | Result statistics |         |         |       |       |       | P-value, T-test |          |          |
|                                                                    | Mean_PA           | Mean_PB | Mean_PC | SD_PA | SD_PB | SD_PC | PA vs PB        | PA vs PC | PB vs PC |
| Mini-mental State Examination (MMSE) score                         | 25.26             | 26.33   | 26.63   | 4.01  | 3.69  | 3.75  | <0.001          | <0.001   | 0.04     |
| Hamilton Anxiety Scale (HAMA) score                                | 15.65             | 13.23   | 11.17   | 8.31  | 7.11  | 5.94  | <0.001          | <0.001   | <0.001   |
| Hamilton Depression Scale-17 (HADM-17) score                       | 9.17              | 7.46    | 6.63    | 6.13  | 4.28  | 4.26  | <0.001          | <0.001   | <0.001   |
| Parkinson's Disease Sleep Scale (PDSS) score                       | 111.08            | 116.63  | 121.02  | 20.59 | 20.51 | 17.19 | <0.01           | <0.001   | <0.01    |
| Visual Analogue Scale (VAS) score                                  | 0.77              | 0.56    | 0.58    | 1.60  | 1.27  | 1.15  | 0.24            | 0.21     | 0.87     |
| Unified PD Rating Scale-III (UPDRS- III) score                     | 19.38             | 17.97   | 17.45   | 9.38  | 9.24  | 9.15  | 0.04            | 0.02     | 0.02     |
| Activities of daily living (ADL) score                             | 20.38             | 19.72   | 19.52   | 7.81  | 7.62  | 7.54  | 0.14            | 0.11     | 0.41     |
| Patient-Assessment of Constipation Quality Of Life (PAC-QCL) score | 72.52             | 60.02   | 54.88   | 17.72 | 13.15 | 12.02 | <0.001          | <0.001   | <0.001   |
| Bristol scores                                                     | 2.73              | 3.40    | 3.58    | 1.06  | 0.64  | 0.57  | <0.001          | <0.001   | 0.07     |
| Difficulty in defecation                                           | 2.50              | 1.81    | 1.63    | 0.65  | 0.53  | 0.60  | <0.001          | <0.001   | 0.01     |
| Hardness of feces                                                  | 2.27              | 1.63    | 1.35    | 0.91  | 0.73  | 0.69  | <0.001          | <0.001   | <0.01    |
| Incomplete defecation                                              | 1.65              | 0.85    | 0.58    | 1.18  | 0.89  | 0.70  | <0.001          | <0.001   | 0.02     |
| Assisted defecation by hand                                        | 0.92              | 0.52    | 0.25    | 0.93  | 0.71  | 0.48  | <0.001          | <0.001   | 0.00     |
| Number/week of spontaneous defecation                              | 3.13              | 4.00    | 4.24    | 1.66  | 1.61  | 1.73  | <0.001          | <0.001   | 0.12     |
| Number/week of completed defecation                                | 1.42              | 2.84    | 3.33    | 1.44  | 1.80  | 1.71  | <0.001          | <0.001   | <0.01    |
| <b>Placebo group</b>                                               |                   |         |         |       |       |       |                 |          |          |
| Differential indicators                                            | Result statistics |         |         |       |       |       | P-value, T-test |          |          |
|                                                                    | Mean_CA           | Mean_CB | Mean_CC | SD_CA | SD_CB | SD_CC | CA vs CB        | CA vs CC | CB vs CC |
| Mini-mental State Examination (MMSE) score                         | 25.47             | 25.71   | 25.88   | 4.37  | 4.32  | 4.41  | 0.03            | <0.01    | 0.21     |
| Hamilton Anxiety Scale (HAMA) score                                | 14.91             | 14.21   | 13.85   | 5.72  | 5.61  | 5.28  | 0.15            | <0.001   | 0.44     |
| Hamilton Depression Scale-17 (HADM-17) score                       | 9.21              | 8.68    | 8.56    | 5.52  | 5.00  | 4.98  | <0.001          | <0.001   | 0.10     |
| Parkinson's Disease Sleep Scale (PDSS) score                       | 126.41            | 127.47  | 127.85  | 15.51 | 13.94 | 14.15 | 0.15            | 0.10     | 0.60     |
| Visual Analogue Scale (VAS) score                                  | 0.50              | 0.47    | 0.47    | 1.09  | 1.01  | 1.01  | 0.33            | 0.33     | 1.00     |
| Unified PD Rating Scale-III (UPDRS- III) score                     | 18.12             | 18.00   | 18.53   | 6.80  | 6.86  | 6.97  | 0.40            | 0.07     | <0.01    |
| Activities of daily living (ADL) score                             | 22.44             | 22.29   | 22.41   | 10.05 | 9.75  | 9.70  | 0.33            | 0.88     | 0.33     |
| Patient-Assessment of Constipation Quality Of Life (PAC-QCL) score | 69.71             | 69.53   | 69.38   | 15.22 | 15.70 | 15.07 | 0.89            | 0.84     | 0.85     |
| Bristol scores                                                     | 2.68              | 2.79    | 2.91    | 1.13  | 0.80  | 0.66  | 0.33            | 0.07     | 0.04     |

|                                       |      |      |      |      |      |      |       |        |      |
|---------------------------------------|------|------|------|------|------|------|-------|--------|------|
| Difficulty in defecation              | 2.32 | 2.26 | 2.21 | 0.72 | 0.78 | 0.80 | 0.33  | 0.16   | 0.33 |
| Hardness of feces                     | 2.06 | 2.12 | 1.97 | 0.87 | 0.76 | 0.89 | 0.42  | 0.37   | 0.02 |
| Incomplete defecation                 | 1.38 | 1.18 | 1.06 | 1.03 | 0.82 | 0.80 | <0.01 | <0.001 | 0.04 |
| Assisted defecation by hand           | 0.79 | 0.56 | 0.53 | 1.02 | 0.91 | 0.88 | 0.03  | 0.02   | 0.33 |
| Number/week of spontaneous defecation | 2.78 | 2.91 | 3.01 | 1.40 | 1.27 | 1.29 | 0.18  | 0.02   | 0.03 |
| Number/week of completed defecation   | 1.25 | 1.22 | 1.40 | 1.25 | 1.21 | 1.16 | 0.70  | 0.26   | 0.09 |

**Probiotic group vs Placebo group**

| Differential indicators                                            | <i>P</i> -value, Wilcox-test |          |          |
|--------------------------------------------------------------------|------------------------------|----------|----------|
|                                                                    | CA vs PA                     | CB vs PB | CC vs PC |
| Mini-mental State Examination (MMSE) score                         | 0.71                         | 0.57     | 0.44     |
| Hamilton Anxiety Scale (HAMA) score                                | 0.91                         | 0.35     | 0.02     |
| Hamilton Depression Scale-17 (HADM-17) score                       | 0.93                         | 0.49     | 0.16     |
| Parkinson's Disease Sleep Scale (PDSS) score                       | <0.01                        | 0.02     | 0.09     |
| Visual Analogue Scale (VAS) score                                  | 0.64                         | 0.89     | 0.80     |
| Unified PD Rating Scale-III (UPDRS- III) score                     | 0.85                         | 0.51     | 0.26     |
| Activities of daily living (ADL) score                             | 0.52                         | 0.29     | 0.18     |
| Patient-Assessment of Constipation Quality Of Life (PAC-QCL) score | 0.53                         | 0.00     | <0.001   |
| Bristol scores                                                     | 0.80                         | <0.001   | <0.001   |
| Difficulty in defecation                                           | 0.24                         | 0.00     | 0.00     |
| Hardness of feces                                                  | 0.20                         | 0.00     | 0.00     |
| Incomplete defecation                                              | 0.30                         | 0.08     | 0.01     |
| Assisted defecation by hand                                        | 0.38                         | 0.75     | 0.22     |
| Number/week of spontaneous defecation                              | 0.41                         | <0.01    | <0.01    |
| Number/week of completed defecation                                | 0.98                         | <0.001   | <0.001   |

Supplementary Table 6 Significant differential species-level genome bins (SGBs) between probiotic and placebo groups at different time points Remarks:P, Probio-M8 group; C, placebo group; A, 0d; B, 1M; C, 3M

| Probiotic group   |                                    |                          |         |         |       |       |       |                 |          |          |
|-------------------|------------------------------------|--------------------------|---------|---------|-------|-------|-------|-----------------|----------|----------|
| Differential SGBs |                                    | Result statistics (RPKM) |         |         |       |       |       | P-value, T-test |          |          |
| SGBs ID           | Taxonomy                           | Mean_PA                  | Mean_PB | Mean_PC | SD_PA | SD_PB | SD_PC | PA vs TB        | PB vs PC | PA vs PC |
| SGB_120           | Weissella cibaria                  | 0.04                     | 0.14    | 0.00    | 0.11  | 0.92  | 0.00  | 0.45            | 0.30     | 0.03     |
| SGB_174           | Ruminococcus sp. CAG:1             | 0.00                     | 0.07    | 0.06    | 0.03  | 0.24  | 0.18  | 0.10            | 0.83     | 0.05     |
| SGB_220           | Evtapia gabavorous                 | 0.67                     | 0.34    | 0.58    | 1.11  | 0.38  | 1.13  | 0.05            | 0.19     | 0.68     |
| SGB_224           | Oscillibacter sp.CAG:1             | 0.02                     | 0.15    | 0.08    | 0.07  | 0.57  | 0.18  | 0.15            | 0.47     | 0.04     |
| SGB_240           | Firmicutes bacterium CAG:176_63_11 | 0.39                     | 0.26    | 1.12    | 0.97  | 0.74  | 2.84  | 0.53            | 0.05     | 0.11     |
| SGB_255           | Clostridiales sp. CAG:16           | 0.42                     | 0.27    | 0.76    | 0.65  | 0.44  | 1.21  | 0.21            | 0.01     | 0.10     |
| SGB_261           | Firmicutes bacterium CAG:124       | 3.55                     | 1.38    | 4.16    | 7.02  | 2.66  | 7.27  | 0.05            | 0.02     | 0.70     |
| SGB_285           | Clostridiales sp. CAG:30           | 0.04                     | 0.09    | 0.14    | 0.11  | 0.23  | 0.32  | 0.26            | 0.44     | 0.01     |
| SGB_309           | Ruminococcaceae sp. CAG:22         | 0.02                     | 0.08    | 0.32    | 0.06  | 0.17  | 1.32  | 0.03            | 0.23     | 0.13     |
| SGB_332           | uncultured Ruminococcus sp.        | 0.31                     | 0.04    | 0.16    | 0.93  | 0.10  | 0.37  | 0.05            | 0.05     | 0.30     |
| SGB_384           | uncultured Ruminococcus sp.        | 1.98                     | 0.93    | 1.87    | 2.43  | 1.88  | 3.24  | 0.04            | 0.13     | 0.85     |
| SGB_403           | uncultured Clostridium sp.         | 0.22                     | 0.33    | 0.32    | 0.27  | 0.28  | 0.33  | 0.05            | 0.79     | 0.14     |
| SGB_430           | Clostridium sp. CAG:58             | 0.13                     | 0.08    | 0.25    | 0.31  | 0.19  | 0.45  | 0.37            | 0.03     | 0.16     |
| SGB_444           | Firmicutes bacterium AM10-47       | 0.57                     | 0.47    | 0.24    | 1.04  | 1.00  | 0.37  | 0.65            | 0.13     | 0.04     |
| SGB_465           | uncultured Clostridium sp.         | 1.10                     | 1.48    | 0.49    | 2.03  | 3.16  | 0.95  | 0.39            | 0.04     | 0.07     |
| SGB_536           | Parabacteroides distasonis         | 1.87                     | 1.15    | 1.23    | 1.74  | 1.06  | 1.21  | 0.03            | 0.94     | 0.03     |
| SGB_647           | Bifidobacterium animalis           | 0.16                     | 4.57    | 2.51    | 1.06  | 10.66 | 7.86  | <0.01           | 0.33     | 0.05     |
| SGB_689           | unnamed Ruminococcaceae sp. CAG:1  | 0.15                     | 0.04    | 0.16    | 0.49  | 0.09  | 0.42  | 0.12            | 0.05     | 0.95     |
| SGB_83            | Mycoplasma sp. CAG:1               | 0.22                     | 0.43    | 0.07    | 0.69  | 1.16  | 0.33  | 0.28            | 0.05     | 0.20     |

| Placebo group     |                         |                          |         |         |       |       |       |                 |         |          |
|-------------------|-------------------------|--------------------------|---------|---------|-------|-------|-------|-----------------|---------|----------|
| Differential SGBs |                         | Result statistics (RPKM) |         |         |       |       |       | P-value, T-test |         |          |
| SGBs ID           | Taxonomy                | Mean_CA                  | Mean_CB | Mean_CC | SD_CA | SD_CB | SD_CC | CA vs CB        | CBvs CC | CA vs CC |
| SGB_567           | Butyricimonas sp. CAG:1 | 0.03                     | 0.02    | 0.00    | 0.08  | 0.06  | 0.00  | 0.77            | 0.05    | 0.09     |

| Between the probiotic and placebo groups |                         |                          |         |         |         |         |         |       |       |       |
|------------------------------------------|-------------------------|--------------------------|---------|---------|---------|---------|---------|-------|-------|-------|
| Differential SGBs                        |                         | Result statistics (RPKM) |         |         |         |         |         |       |       |       |
| SGBs ID                                  | Taxonomy                | Mean_PA                  | Mean_CA | Mean_PB | Mean_CB | Mean_PC | Mean_CC | SD_PA | SD_CA | SD_PB |
| SGB_368                                  | Roseburia inulinivorans | 1.07                     | 1.42    | 0.80    | 1.76    | 1.08    | 1.59    | 1.54  | 1.27  | 1.22  |
| SGB_392                                  | Eubacterium ventriosum  | 0.43                     | 0.41    | 0.25    | 0.41    | 0.50    | 0.40    | 0.60  | 0.55  | 0.52  |
| SGB_438                                  | Roseburia sp. CAG:182   | 0.00                     | 0.03    | 0.00    | 0.06    | 0.08    | 0.04    | 0.02  | 0.11  | 0.03  |
| SGB_375                                  | Eubacterium sp.         | 0.09                     | 0.11    | 0.04    | 0.12    | 0.18    | 0.14    | 0.36  | 0.20  | 0.22  |

|         |                                           |      |      |      |      |      |      |       |      |       |
|---------|-------------------------------------------|------|------|------|------|------|------|-------|------|-------|
| SGB_27  | <i>Klebsiella oxytoca</i>                 | 0.00 | 0.22 | 0.00 | 0.47 | 0.11 | 0.44 | 0.00  | 0.80 | 0.00  |
| SGB_127 | <i>Lactobacillus fermentum</i>            | 0.00 | 0.25 | 0.00 | 0.26 | 0.08 | 0.22 | 0.02  | 0.92 | 0.00  |
| SGB_589 | <i>Prevotella</i> sp. CAG:3               | 0.25 | 0.25 | 0.00 | 0.28 | 0.00 | 0.12 | 1.67  | 0.79 | 0.00  |
| SGB_50  | <i>Azospirillum</i> sp.                   | 0.37 | 0.19 | 0.25 | 0.22 | 0.07 | 0.17 | 1.81  | 0.51 | 1.53  |
| SGB_654 | <i>Methanobrevibacter smithii</i> CAG:186 | 0.23 | 0.50 | 0.25 | 0.57 | 0.57 | 1.11 | 0.62  | 1.07 | 0.94  |
| SGB_407 | <i>Dorea longicatena</i>                  | 0.34 | 0.60 | 0.24 | 0.48 | 0.36 | 0.54 | 0.49  | 0.87 | 0.40  |
| SGB_195 | <i>Faecalibacterium prausnitzii</i>       | 8.24 | 8.38 | 5.47 | 7.62 | 7.05 | 6.84 | 10.70 | 7.54 | 5.72  |
| SGB_647 | <i>Bifidobacterium animalis</i>           | 0.16 | 0.08 | 4.57 | 0.06 | 2.51 | 0.04 | 1.06  | 0.35 | 10.66 |
| SGB_377 | <i>Lachnospira eligens</i>                | 2.48 | 0.87 | 2.36 | 0.90 | 1.86 | 1.08 | 4.89  | 0.81 | 3.02  |
| SGB_614 | uncultured <i>Bacteroides</i> sp.         | 0.85 | 0.27 | 0.71 | 0.20 | 0.50 | 0.19 | 1.57  | 0.53 | 1.23  |
| SGB_421 | <i>Enterocloster bolteae</i>              | 0.11 | 0.17 | 0.28 | 0.11 | 0.11 | 0.15 | 0.25  | 0.70 | 1.12  |
| SGB_342 | uncultured <i>Ruminococcus</i> sp.        | 0.20 | 0.01 | 0.07 | 0.00 | 0.19 | 0.02 | 0.68  | 0.05 | 0.21  |
| SGB_317 | <i>Ruminococcaceae</i> sp. CAG:18         | 0.04 | 0.01 | 0.04 | 0.00 | 0.01 | 0.01 | 0.17  | 0.05 | 0.12  |
| SGB_33  | <i>Enterobacter cloacae</i>               | 0.14 | 0.08 | 0.90 | 0.09 | 0.01 | 0.09 | 0.62  | 0.22 | 5.74  |
| SGB_462 | <i>Eubacterium rectale</i>                | 5.24 | 7.06 | 4.56 | 7.69 | 4.89 | 7.38 | 9.23  | 9.51 | 8.26  |
| SGB_607 | <i>Bacteroides intestinalis</i>           | 0.51 | 0.40 | 0.62 | 0.36 | 0.86 | 0.26 | 0.98  | 1.13 | 1.03  |
| SGB_316 | <i>Ruminococcaceae</i> sp. CAG:20         | 0.36 | 0.35 | 0.28 | 0.30 | 0.36 | 0.26 | 0.71  | 0.69 | 0.85  |
| SGB_567 | <i>Butyricimonas</i> sp. CAG:1            | 0.06 | 0.03 | 0.06 | 0.02 | 0.04 | 0.00 | 0.16  | 0.08 | 0.20  |
| SGB_425 | <i>Eubacterium</i> sp. CAG:3              | 0.05 | 0.01 | 0.14 | 0.04 | 0.09 | 0.00 | 0.18  | 0.06 | 0.54  |
| SGB_275 | <i>Clostridiales</i> sp. CAG:26           | 0.50 | 0.18 | 0.45 | 0.16 | 0.84 | 0.21 | 0.77  | 0.29 | 1.00  |
| SGB_226 | <i>Oscillibacter</i> sp. CAG:4            | 0.26 | 0.19 | 0.20 | 0.16 | 0.32 | 0.13 | 0.38  | 0.27 | 0.34  |
| SGB_100 | <i>Clostridium</i> sp. CAG:628            | 0.09 | 0.53 | 0.52 | 0.40 | 0.44 | 0.45 | 0.53  | 2.38 | 1.99  |
| SGB_395 | <i>Eubacterium</i> sp. AF15-50            | 0.04 | 0.03 | 0.03 | 0.04 | 0.09 | 0.05 | 0.15  | 0.15 | 0.11  |
| SGB_378 | uncultured <i>Lachnospira</i> sp.         | 0.93 | 0.51 | 0.97 | 0.56 | 0.99 | 0.50 | 1.13  | 0.52 | 1.43  |



---

---

|       |       |       | <b>P-value, Wilcox-test</b> |          |          |
|-------|-------|-------|-----------------------------|----------|----------|
| SD_CB | SD_PC | SD_CC | PA vs CA                    | PB vs CB | PC vs CC |
| 1.62  | 1.68  | 2.02  | no_sig                      | <0.01    | 0.05     |
| 0.45  | 1.05  | 0.39  | no_sig                      | <0.01    | 0.16     |
| 0.15  | 0.37  | 0.14  | no_sig                      | 0.01     | 0.78     |
| 0.25  | 0.57  | 0.33  | no_sig                      | 0.02     | 0.53     |

|      |      |      |        |        |        |
|------|------|------|--------|--------|--------|
| 1.48 | 0.57 | 1.45 | no_sig | 0.02   | 0.47   |
| 1.00 | 0.39 | 0.88 | no_sig | 0.02   | 0.88   |
| 0.95 | 0.00 | 0.37 | no_sig | 0.02   | 0.02   |
| 0.55 | 0.44 | 0.46 | no_sig | 0.02   | 0.05   |
| 1.40 | 2.23 | 2.65 | no_sig | 0.03   | 0.39   |
| 0.60 | 0.57 | 0.62 | no_sig | 0.03   | 0.06   |
| 5.58 | 7.96 | 4.41 | no_sig | 0.04   | 0.24   |
| 0.26 | 7.86 | 0.16 | no_sig | <0.001 | <0.001 |
| 0.83 | 2.76 | 1.29 | no_sig | 0.03   | 0.33   |
| 0.33 | 0.73 | 0.42 | no_sig | 0.04   | 0.01   |
| 0.54 | 0.22 | 0.70 | no_sig | 0.04   | 0.05   |
| 0.00 | 0.65 | 0.05 | no_sig | 0.04   | 0.35   |
| 0.00 | 0.06 | 0.03 | no_sig | 0.04   | 0.84   |
| 0.29 | 0.08 | 0.28 | no_sig | 0.52   | 0.04   |
| 9.66 | 9.33 | 9.43 | no_sig | 0.06   | 0.05   |
| 0.94 | 2.11 | 0.64 | no_sig | 0.10   | 0.01   |
| 0.62 | 0.42 | 0.58 | no_sig | 0.71   | 0.01   |
| 0.06 | 0.10 | 0.00 | no_sig | 0.45   | 0.02   |
| 0.22 | 0.27 | 0.00 | no_sig | 0.20   | 0.03   |
| 0.29 | 2.21 | 0.36 | no_sig | 0.54   | 0.04   |
| 0.21 | 0.38 | 0.20 | no_sig | 0.81   | 0.04   |
| 1.71 | 3.00 | 1.96 | no_sig | 0.72   | 0.05   |
| 0.14 | 0.18 | 0.22 | no_sig | 0.98   | 0.05   |
| 0.62 | 1.49 | 0.48 | no_sig | 0.16   | 0.05   |

Supplementary Table 7 Distributions of species-level genome bins (SGBs) and predicted metabolic modules across different phyla

| <b>Module ID</b> | <b>Annotation</b>                                          | <b>Total number of SGBs</b> |
|------------------|------------------------------------------------------------|-----------------------------|
| GMM015           | p-Cresol synthesis                                         | 291                         |
| GMM059           | Secondary bile acid biosynthesis                           | 23                          |
| GMM037           | Inositol synthesis                                         | 37                          |
| GMM038           | Inositol degradation                                       | 114                         |
| GMM016           | p-Cresol degradation                                       | 1                           |
| GMM039           | g-Hydroxybutyric acid (GHB) degradation                    | 52                          |
| GMM017           | IPA synthesis (Clostridium sporogenes pathway)             | 5                           |
| GMM011           | Cortisol degradation                                       | 198                         |
| GMM033           | Quinolinic acid degradation                                | 441                         |
| GMM055           | Propionate synthesis III                                   | 63                          |
| GMM034           | Isovaleric acid synthesis I (KADH pathway)                 | 5                           |
| GMM012           | Dopamine synthesis                                         | 1                           |
| GMM056           | Propionate degradation I                                   | 1                           |
| GMM057           | Corrinoid dependent enzymes                                | 599                         |
| GMM035           | Isovaleric acid synthesis II (KADC pathway)                | 110                         |
| GMM036           | S-Adenosylmethionine (SAM) synthesis                       | 461                         |
| GMM058           | Secondary bile acid biosynthesis                           | 23                          |
| GMM052           | Butyrate synthesis I                                       | 118                         |
| GMM030           | Polysaccharide A                                           | 16                          |
| GMM031           | 17-beta-Estradiol degradation                              | 423                         |
| GMM053           | Butyrate synthesis II                                      | 2                           |
| GMM054           | Propionate synthesis II                                    | 48                          |
| GMM010           | Histamine degradation                                      | 5                           |
| GMM019           | GABA degradation                                           | 61                          |
| GMM048           | Propionate synthesis I                                     | 5                           |
| GMM026           | Nitric oxide synthesis II (nitrite reductase)              | 2                           |
| GMM005           | Tryptophan synthesis                                       | 36                          |
| GMM049           | Tryptophan degradation                                     | 45                          |
| GMM027           | Nitric oxide degradation I (NO dioxygenase)                | 31                          |
| GMM006           | Glutamate synthesis I                                      | 428                         |
| GMM029           | ClpB (ATP-dependent chaperone protein)                     | 414                         |
| GMM007           | Glutamate synthesis II                                     | 7                           |
| GMM022           | GABA synthesis III                                         | 51                          |
| GMM044           | Acetate synthesis II                                       | 2                           |
| GMM001           | Serotonin synthesis I                                      | 1                           |
| GMM045           | Acetate synthesis III                                      | 26.5                        |
| GMM023           | Dopamine degradation                                       | 12                          |
| GMM024           | DOPAC synthesis                                            | 4                           |
| GMM047           | Acetate degradation                                        | 150                         |
| GMM003           | Melatonin synthesis                                        | 38                          |
| GMM025           | Nitric oxide synthesis I (NO synthase)                     | 1                           |
| GMM040           | Menaquinone synthesis (vitamin K2) I                       | 81                          |
| GMM041           | Menaquinone synthesis (vitamin K2) II ( fualosine pathway) | 6                           |
| GMM042           | PUFAs synthesis (AA, EPA, DHA)                             | 217                         |
| GMM020           | GABA synthesis I                                           | 8                           |
| GMM043           | Acetate synthesis I                                        | 467                         |
| GMM021           | GABA synthesis II                                          | 6                           |
| GMM009           | Histamine synthesis                                        | 14                          |

| Percentage (%) | Actinobacteria | Bacteroidetes | Candidatus | Cyanobacteria | Elusimicrobia |
|----------------|----------------|---------------|------------|---------------|---------------|
| 42.11          | 5              | 53            | 1          | 2             | 2             |
| 3.33           | 1              | 2             | 0          | 0             | 0             |
| 5.35           | 1              | 33            | 0          | 0             | 0             |
| 16.50          | 1              | 15            | 0          | 0             | 0             |
| 0.14           | 0              | 0             | 0          | 0             | 0             |
| 7.53           | 0              | 5             | 0          | 1             | 0             |
| 0.72           | 0              | 0             | 0          | 0             | 0             |
| 28.65          | 1              | 36            | 0          | 0             | 0             |
| 63.82          | 17             | 78            | 2          | 1             | 2             |
| 9.12           | 0              | 50            | 0          | 0             | 0             |
| 0.72           | 0              | 0             | 0          | 0             | 0             |
| 0.14           | 0              | 0             | 0          | 0             | 0             |
| 0.14           | 0              | 0             | 0          | 0             | 0             |
| 86.69          | 23             | 97            | 2          | 1             | 2             |
| 15.92          | 4              | 7             | 1          | 0             | 0             |
| 66.71          | 10             | 75            | 2          | 1             | 2             |
| 3.33           | 0              | 10            | 0          | 0             | 0             |
| 17.08          | 0              | 50            | 0          | 0             | 2             |
| 2.32           | 0              | 8             | 0          | 0             | 0             |
| 61.22          | 14             | 71            | 1          | 0             | 1             |
| 0.29           | 0              | 0             | 0          | 0             | 0             |
| 6.95           | 0              | 0             | 0          | 0             | 0             |
| 0.72           | 0              | 0             | 0          | 0             | 0             |
| 8.83           | 0              | 0             | 0          | 0             | 0             |
| 0.72           | 0              | 0             | 0          | 0             | 0             |
| 0.29           | 0              | 0             | 0          | 0             | 0             |
| 5.21           | 0              | 0             | 0          | 0             | 0             |
| 6.51           | 0              | 32            | 0          | 0             | 0             |
| 4.49           | 1              | 1             | 0          | 0             | 0             |
| 61.94          | 14             | 86            | 0          | 1             | 2             |
| 59.91          | 9              | 79            | 2          | 1             | 0             |
| 1.01           | 0              | 0             | 0          | 0             | 0             |
| 7.38           | 2              | 36            | 0          | 0             | 0             |
| 0.29           | 0              | 0             | 0          | 0             | 0             |
| 0.14           | 0              | 0             | 0          | 0             | 0             |
| 3.84           | 0              | 11            | 0          | 1.5           | 0             |
| 1.74           | 0              | 0             | 0          | 0             | 0             |
| 0.58           | 0              | 0             | 0          | 0             | 0             |
| 21.71          | 7              | 45            | 0          | 0             | 0             |
| 5.50           | 8              | 0             | 0          | 0             | 0             |
| 0.14           | 0              | 0             | 0          | 0             | 0             |
| 11.72          | 5              | 54            | 0          | 0             | 0             |
| 0.87           | 0              | 2             | 0          | 0             | 0             |
| 31.40          | 1              | 40            | 0          | 0             | 0             |
| 1.16           | 0              | 0             | 0          | 0             | 0             |
| 67.58          | 8              | 78            | 0          | 0             | 1             |
| 0.87           | 0              | 0             | 0          | 0             | 0             |
| 2.03           | 0              | 8             | 0          | 0             | 0             |

| <b>Euryarchaeota</b> | <b>Firmicutes</b> | <b>Fusobacteria</b> | <b>Lentisphaerae</b> | <b>Proteobacteria</b> | <b>Synergistetes</b> |
|----------------------|-------------------|---------------------|----------------------|-----------------------|----------------------|
| 0                    | 185               | 3                   | 4                    | 31                    | 0                    |
| 0                    | 20                | 0                   | 0                    | 0                     | 0                    |
| 2                    | 1                 | 0                   | 0                    | 0                     | 0                    |
| 0                    | 86                | 0                   | 2                    | 9                     | 0                    |
| 0                    | 0                 | 0                   | 0                    | 1                     | 0                    |
| 0                    | 40                | 1                   | 0                    | 5                     | 0                    |
| 0                    | 5                 | 0                   | 0                    | 0                     | 0                    |
| 0                    | 146               | 2                   | 1                    | 12                    | 0                    |
| 5                    | 294               | 3                   | 3                    | 25                    | 2                    |
| 0                    | 9                 | 0                   | 0                    | 0                     | 0                    |
| 0                    | 5                 | 0                   | 0                    | 0                     | 0                    |
| 0                    | 1                 | 0                   | 0                    | 0                     | 0                    |
| 0                    | 0                 | 0                   | 0                    | 1                     | 0                    |
| 3                    | 409               | 3                   | 3                    | 39                    | 2                    |
| 0                    | 89                | 0                   | 2                    | 6                     | 1                    |
| 5                    | 326               | 3                   | 2                    | 27                    | 0                    |
| 0                    | 9                 | 2                   | 0                    | 1                     | 1                    |
| 0                    | 65                | 1                   | 0                    | 0                     | 0                    |
| 0                    | 7                 | 0                   | 0                    | 0                     | 0                    |
| 0                    | 287               | 2                   | 1                    | 31                    | 0                    |
| 0                    | 2                 | 0                   | 0                    | 0                     | 0                    |
| 0                    | 40                | 2                   | 1                    | 4                     | 1                    |
| 0                    | 0                 | 0                   | 0                    | 5                     | 0                    |
| 0                    | 49                | 0                   | 1                    | 11                    | 0                    |
| 0                    | 1                 | 0                   | 0                    | 4                     | 0                    |
| 0                    | 0                 | 0                   | 0                    | 2                     | 0                    |
| 0                    | 28                | 0                   | 0                    | 8                     | 0                    |
| 0                    | 6                 | 0                   | 0                    | 5                     | 0                    |
| 0                    | 12                | 1                   | 0                    | 16                    | 0                    |
| 5                    | 286               | 2                   | 4                    | 20                    | 1                    |
| 0                    | 267               | 3                   | 4                    | 35                    | 0                    |
| 0                    | 7                 | 0                   | 0                    | 0                     | 0                    |
| 0                    | 8                 | 0                   | 0                    | 3                     | 0                    |
| 0                    | 2                 | 0                   | 0                    | 0                     | 0                    |
| 0                    | 1                 | 0                   | 0                    | 0                     | 0                    |
| 0                    | 13                | 1                   | 0                    | 0                     | 0                    |
| 0                    | 4                 | 0                   | 0                    | 8                     | 0                    |
| 0                    | 2                 | 0                   | 0                    | 2                     | 0                    |
| 6                    | 86                | 0                   | 2                    | 4                     | 0                    |
| 0                    | 15                | 0                   | 0                    | 15                    | 0                    |
| 0                    | 1                 | 0                   | 0                    | 0                     | 0                    |
| 0                    | 9                 | 0                   | 0                    | 13                    | 0                    |
| 0                    | 0                 | 0                   | 0                    | 1                     | 0                    |
| 0                    | 142               | 1                   | 4                    | 28                    | 1                    |
| 0                    | 0                 | 0                   | 0                    | 8                     | 0                    |
| 0                    | 340               | 2                   | 3                    | 22                    | 1                    |
| 0                    | 0                 | 0                   | 0                    | 6                     | 0                    |
| 0                    | 1                 | 1                   | 0                    | 1                     | 0                    |

| <u>Tenericutes</u> | <u>Verrucomicrobia</u> |
|--------------------|------------------------|
| 0                  | 5                      |
| 0                  | 0                      |
| 0                  | 0                      |
| 0                  | 1                      |
| 0                  | 0                      |
| 0                  | 0                      |
| 0                  | 0                      |
| 0                  | 0                      |
| 2                  | 7                      |
| 0                  | 4                      |
| 0                  | 0                      |
| 0                  | 0                      |
| 6                  | 9                      |
| 0                  | 0                      |
| 4                  | 4                      |
| 0                  | 0                      |
| 0                  | 0                      |
| 0                  | 1                      |
| 6                  | 9                      |
| 0                  | 0                      |
| 0                  | 0                      |
| 0                  | 0                      |
| 0                  | 0                      |
| 0                  | 0                      |
| 0                  | 0                      |
| 0                  | 0                      |
| 0                  | 0                      |
| 0                  | 2                      |
| 0                  | 0                      |
| 1                  | 6                      |
| 6                  | 8                      |
| 0                  | 0                      |
| 0                  | 2                      |
| 0                  | 0                      |
| 0                  | 0                      |
| 0                  | 0                      |
| 0                  | 0                      |
| 0                  | 0                      |
| 0                  | 0                      |
| 0                  | 0                      |
| 0                  | 0                      |
| 0                  | 0                      |
| 0                  | 0                      |
| 0                  | 0                      |
| 0                  | 3                      |
| 0                  | 0                      |
| 0                  | 0                      |
| 6                  | 6                      |
| 0                  | 0                      |
| 0                  | 3                      |

Supplementary Table 8 Significant differential serum metabolites between the probiotic and placebo groups Remarks:P, Probio-M8 group; C, placebo group; A, 0d; B, 1M; C, 3M

| Differential metabolites | Between the probiotic and placebo groups |          |          |          |          |          |          |          |          |          |          |          |
|--------------------------|------------------------------------------|----------|----------|----------|----------|----------|----------|----------|----------|----------|----------|----------|
|                          | Mean_PA                                  | Mean_CA  | Mean_PB  | Mean_CB  | Mean_PC  | Mean_CC  | SD_PA    | SD_CA    | SD_PB    | SD_CB    | SD_PC    | SD_CC    |
| stearoyl ethanolamide    | 3.84E-05                                 | 3.51E-05 | 3.63E-05 | 3.28E-05 | 3.60E-05 | 3.62E-05 | 1.04E-05 | 9.58E-06 | 8.11E-06 | 6.47E-06 | 1.01E-05 | 8.87E-06 |
| chenodeoxycholate        | 3.85E-04                                 | 4.08E-04 | 4.20E-04 | 3.95E-04 | 3.18E-04 | 4.21E-04 | 2.03E-04 | 2.28E-04 | 1.75E-04 | 2.45E-04 | 2.01E-04 | 1.92E-04 |
| trimethyllysine          | 3.30E-04                                 | 3.50E-04 | 3.28E-04 | 3.62E-04 | 3.20E-04 | 3.71E-04 | 1.06E-04 | 7.77E-05 | 8.68E-05 | 9.84E-05 | 8.37E-05 | 9.72E-05 |
| bilirubin                | 3.51E-04                                 | 3.49E-04 | 3.56E-04 | 3.46E-04 | 3.33E-04 | 3.49E-04 | 3.50E-05 | 3.92E-05 | 2.93E-05 | 3.32E-05 | 3.13E-05 | 3.79E-05 |
| erythronic acid          | 1.14E-04                                 | 1.21E-04 | 1.18E-04 | 1.16E-04 | 1.05E-04 | 1.19E-04 | 2.10E-05 | 2.65E-05 | 2.07E-05 | 2.37E-05 | 2.39E-05 | 2.68E-05 |
| creatine                 | 5.86E-04                                 | 6.69E-04 | 6.77E-04 | 6.67E-04 | 4.77E-04 | 7.03E-04 | 2.95E-04 | 2.83E-04 | 3.59E-04 | 3.36E-04 | 2.37E-04 | 4.18E-04 |
| ADMA                     | 1.35E-04                                 | 1.54E-04 | 1.55E-04 | 1.56E-04 | 1.36E-04 | 1.57E-04 | 3.93E-05 | 4.73E-05 | 4.01E-05 | 4.99E-05 | 4.41E-05 | 5.06E-05 |
| cholate                  | 2.34E-03                                 | 2.45E-03 | 2.55E-03 | 2.47E-03 | 1.99E-03 | 2.56E-03 | 8.17E-04 | 8.72E-04 | 8.16E-04 | 9.95E-04 | 8.12E-04 | 8.30E-04 |
| C20:4 carnitine          | 1.14E-04                                 | 1.16E-04 | 1.12E-04 | 1.17E-04 | 1.27E-04 | 1.12E-04 | 2.11E-05 | 2.94E-05 | 2.21E-05 | 3.22E-05 | 2.47E-05 | 2.77E-05 |
| cholestenone             | 1.02E-03                                 | 9.96E-04 | 9.07E-04 | 9.85E-04 | 1.11E-03 | 9.75E-04 | 3.08E-04 | 3.54E-04 | 2.47E-04 | 3.47E-04 | 2.98E-04 | 3.60E-04 |
| N-acetylglutamic acid    | 5.96E-05                                 | 6.11E-05 | 5.86E-05 | 6.19E-05 | 6.47E-05 | 5.84E-05 | 1.36E-05 | 1.55E-05 | 1.30E-05 | 1.56E-05 | 1.30E-05 | 1.39E-05 |
| urobilin                 | 2.72E-04                                 | 2.75E-04 | 2.47E-04 | 2.89E-04 | 3.40E-04 | 2.67E-04 | 1.38E-04 | 1.67E-04 | 1.42E-04 | 1.78E-04 | 1.47E-04 | 1.60E-04 |

| Differential metabolites | Wilcoxon.test |          |         |
|--------------------------|---------------|----------|---------|
|                          | PA vs CA      | PB vs CB | PCvs CC |
| stearoyl ethanolamide    | no sig        | 0.05     | 0.70    |
| chenodeoxycholate        | no sig        | 0.24     | 0.02    |
| trimethyllysine          | no sig        | 0.14     | 0.03    |
| bilirubin                | no sig        | 0.14     | 0.03    |
| erythronic acid          | no sig        | 0.98     | 0.03    |
| creatine                 | no sig        | 0.88     | 0.03    |
| ADMA                     | no sig        | 0.94     | 0.05    |
| cholate                  | no sig        | 0.52     | 0.01    |
| C20:4 carnitine          | no sig        | 0.51     | 0.02    |
| cholestenone             | no sig        | 0.45     | 0.04    |
| N-acetylglutamic acid    | no sig        | 0.27     | 0.05    |
| urobilin                 | no sig        | 0.35     | 0.05    |

Supplementary Table 9 Four differential serum metabolites identified by LC-MS Remarks:P, Probio-M8 group; C, placebo group; A, 0d; B, 1M; C, 3M

| Serum Metabolites | Intensity |         |         |          |         |          |         |         |         |         |         |         |
|-------------------|-----------|---------|---------|----------|---------|----------|---------|---------|---------|---------|---------|---------|
|                   | Mean_PA   | Mean_CA | Mean_PB | Mean_CB  | Mean_PC | Mean_CC  | SD_PA   | SD_CA   | SD_PB   | SD_CB   | SD_PC   | SD_CC   |
| Tryptophan        | 9036.25   | 9793.08 | 9381.63 | 10399.70 | 8954.96 | 11240.35 | 2793.15 | 3383.19 | 2840.07 | 3285.38 | 2477.05 | 3221.58 |
| Glutamine         | 1695.42   | 1808.30 | 1502.99 | 1795.52  | 1670.76 | 1753.01  | 594.41  | 572.13  | 429.70  | 477.83  | 582.71  | 546.43  |
| 3_Hydroxytyramine | 4.35      | 3.56    | 6.10    | 4.09     | 5.93    | 6.10     | 3.25    | 2.45    | 3.15    | 2.10    | 5.86    | 2.46    |
| Acetic_acid       | 1.46      | 0.95    | 1.41    | 0.44     | 1.38    | 0.55     | 0.65    | 0.82    | 0.58    | 0.22    | 0.55    | 0.31    |

| Serum Metabolites | Wilcoxon.test |          |         |
|-------------------|---------------|----------|---------|
|                   | PA vs CA      | PB vs CB | PCvs CC |
| Tryptophan        | no sig        | 0.27     | 0.04    |
| Glutamine         | no sig        | 0.05     | 0.43    |
| 3_Hydroxytyramine | no sig        | 0.04     | 0.17    |
| Acetic_acid       | no sig        | <0.001   | <0.001  |
